# Supplementary material for: Three-dimensional modeling of theP. falciparumgenome during the erythrocytic cycle reveals a strong connection between genome architecture and gene expression
Source: HighWire-hosted journal article supplement (doi:10.1101/gr.169417.113), 2014-03-26
Supplement: SuppFile1.xlsx [file SuppFile1.xlsx]

## Sheet: mapping-humanGenome
Library	Lane	End of read	# of raw reads	# of mapped and qualified reads	# of non-mapped reads	# of mapped but not qualified reads	Mapping percentage*	# of paired reads	Pairing percentage*
RINGS	L1	1	159661211	96430061	63206515	24635	0.603967	78535617	0.491889
RINGS	L1	2	159661211	90071585	69571842	17784	0.564142
SCHIZONTS	L1	1	19836708	1008120	18823016	5572	0.0508209	361237	0.0182105
SCHIZONTS	L1	2	19836708	959542	18872488	4678	0.048372
SCHIZONTS	L2	1	90484906	4592754	85867103	25049	0.0507571	1626428	0.0179746
SCHIZONTS	L2	2	90484906	4388696	86074738	21472	0.048502
TROPHOZOITES-NL-GTCA	L1	1	3594010	99971	3493741	298	0.027816	41346	0.0115041
TROPHOZOITES-NL-GTCA	L1	2	3594010	102763	3491010	237	0.0285929
TROPHOZOITES-NL-TATC	L1	1	2614669	108552	2505829	288	0.0415165	49941	0.0191003
TROPHOZOITES-NL-TATC	L1	2	2614669	118262	2496102	305	0.0452302
TROPHOZOITES-XL-AGGG	L1	1	27229779	14620205	12608003	1571	0.53692	12749116	0.468205
TROPHOZOITES-XL-AGGG	L1	2	27229779	14440996	12787010	1773	0.530338
TROPHOZOITES-XL-AGGG	L2	1	16169488	8899617	7268980	891	0.550396	7616770	0.471058
TROPHOZOITES-XL-AGGG	L2	2	16169488	8677420	7491079	989	0.536654
TROPHOZOITES-XL-CCAT	L1	1	48843787	29439852	19401144	2791	0.602735	25862056	0.529485
TROPHOZOITES-XL-CCAT	L1	2	48843787	29560448	19279964	3375	0.605204
TROPHOZOITES-XL-CCAT	L2	1	30180363	18158483	12020250	1630	0.601665	15627705	0.51781
TROPHOZOITES-XL-CCAT	L2	2	30180363	17785188	12393026	2149	0.589297
* Mapping and pairing percentages are calculated w.r.t initial library size (# of raw reads column)

## Sheet: mapping-Pfal3D7 
Library	Lane	End of read	# of raw reads	# of mapped and qualified reads	# of non-mapped reads	# of mapped but not qualified reads	Mapping percentage*	# of paired reads (contacts)	Pairing percentage*
RINGS	L1	1	81125594	41386751	34172017	5566826	0.510157	30474465	0.375646
RINGS	L1	2	81125594	39465523	36489949	5170122	0.486474
SCHIZONTS	L1	1	19475471	15183786	2579434	1712251	0.779636	10341229	0.530987
SCHIZONTS	L1	2	19475471	12777124	4901286	1797061	0.656062
SCHIZONTS	L2	1	88858478	69249526	11782584	7826368	0.779324	47138541	0.53049
SCHIZONTS	L2	2	88858478	58237530	22412166	8208782	0.655396
TROPHOZOITES-NL-GTCA	L1	1	3552664	1329579	2034094	188991	0.374248	1101111	0.30994
TROPHOZOITES-NL-GTCA	L1	2	3552664	1309562	2058113	184989	0.368614
TROPHOZOITES-NL-TATC	L1	1	2564728	1378670	990724	195334	0.53755	1147633	0.447468
TROPHOZOITES-NL-TATC	L1	2	2564728	1366948	1002862	194918	0.53298
TROPHOZOITES-XL-AGGG	L1	1	14480663	7062139	6243399	1175125	0.487694	5573742	0.384909
TROPHOZOITES-XL-AGGG	L1	2	14480663	6991027	6334748	1154888	0.482784
TROPHOZOITES-XL-AGGG	L2	1	8552718	4263424	3584345	704949	0.498488	3341227	0.390663
TROPHOZOITES-XL-AGGG	L2	2	8552718	4184216	3669519	698983	0.489226
TROPHOZOITES-XL-CCAT	L1	1	22981731	11514658	9475739	1991334	0.501035	9110040	0.396404
TROPHOZOITES-XL-CCAT	L1	2	22981731	11488710	9496681	1996340	0.499906
TROPHOZOITES-XL-CCAT	L2	1	14552658	7168406	6134561	1249691	0.492584	5634116	0.387154
TROPHOZOITES-XL-CCAT	L2	2	14552658	7087044	6218167	1247447	0.486993
* Mapping and pairing percentages are calculated w.r.t initial library size (# of raw reads column)

## Sheet: contacts-afterPCRduplicateElim
Library	Lane	# of PCR duplicates*	# of contacts after PCR duplicates	# of intra-chr contacts less than 1kb apart	# of intra-chr contacts between 1kb to 20 kb apart	# of intra-chr contacts above 20 kb apart	# of inter-chr contacts	Sum of colF and colG	ICP**	# of long-range contacts	Percentage of long-range contacts (PLRC)***	PLRC per stage
RINGS	L1	19409183	11065282	2078637	1652589	2567651	4766405	4220240	1.12942	7334056	0.0904037	0.0904037
SCHIZONTS	L1	937469	9403760	2670559	1576228	2304880	2852093	3881108	0.734866	5156973	0.264793	0.220388
SCHIZONTS	L2	13678604	33459937	9084869	5656535	8305801	10412732	13962336	0.745773	18718533	0.210656
TROPHOZOITES-NL-GTCA	L1	870781	230330	136195	2930	7654	83551	10584	7.89409	91205	0.0256723	0.0305258
TROPHOZOITES-NL-TATC	L1	903059	244574	145818	3223	8057	87476	11280	7.75496	95533	0.0372488
TROPHOZOITES-XL-AGGG	L1	4088944	1484798	378367	323043	341879	441509	664922	0.664001	783388	0.0540989	0.0763968
TROPHOZOITES-XL-AGGG	L2	1266279	2074948	830928	364678	385390	493952	750068	0.658543	879342	0.102814
TROPHOZOITES-XL-CCAT	L1	6341648	2768392	721440	599673	635314	811965	1234987	0.657468	1447279	0.0629752
TROPHOZOITES-XL-CCAT	L2	1963359	3670757	1524543	629037	667813	849364	1296850	0.654944	1517177	0.104254
* PCR duplicates column gives the number of contacts that are discarded since there exist other paired end reads that map to identical chromosomal locations on both ends
** ICP (Inter-chromosomal contact probability index) is defined as (# of inter-chromosomal interactions)/(# of intra-chromosomal interactions above 1kb distance)
*** Percentage of long-range contacts is calculated w.r.t initial library size (# of raw reads column)
