# Supplementary material for: Three-dimensional modeling of theP. falciparumgenome during the erythrocytic cycle reveals a strong connection between genome architecture and gene expression
Source: HighWire-hosted journal article supplement (doi:10.1101/gr.169417.113), 2014-03-26
Supplement: SuppFile2.xlsx [file SuppFile2.xlsx]

## Sheet: RINGS-FDR_0.1
Locus 1		Locus 2		Raw contact count	After ICE normalization
Chr.	Mid (10 kb)	Chr.	Mid (10 kb)		p-value	q-value
10	935000	12	1285000	39	8.07607e-53	8.66858e-49		FDR <0.01
1	455000	12	1285000	37	2.03334e-52	2.14854e-48		FDR >=0.01 and <0.05
7	555000	7	585000	186	9.84454e-52	1.0165e-47		FDR >=0.05 and <0.1
4	645000	7	815000	35	2.90593e-48	2.71182e-44
6	475000	7	815000	52	8.50795e-48	7.77923e-44		FISH pairs
11	825000	2	445000	51	1.65875e-47	1.50151e-43
12	1285000	13	1175000	44	1.5465e-44	1.23885e-40
12	1285000	14	1075000	34	1.71965e-43	1.30809e-39
1	465000	12	1285000	38	9.33544e-43	6.85175e-39
2	445000	7	815000	43	2.29621e-41	1.59888e-37
12	1285000	7	815000	39	8.90035e-40	5.93856e-36
7	545000	7	575000	102	4.03486e-39	2.61507e-35
7	555000	7	595000	143	1.95412e-38	1.22839e-34
11	825000	13	1175000	49	2.85248e-38	1.76855e-34
2	445000	8	295000	37	4.47189e-38	2.72897e-34
11	825000	7	815000	46	3.16288e-37	1.86316e-33
14	1075000	2	445000	32	3.94275e-37	2.31252e-33
10	935000	6	475000	34	4.92593e-37	2.87676e-33
6	475000	8	295000	39	2.0541e-36	1.1597e-32
1	465000	2	445000	36	2.3578e-36	1.3284e-32
10	935000	11	825000	34	8.26353e-35	4.40876e-31
5	455000	7	815000	28	2.84045e-34	1.47487e-30
14	1075000	5	465000	31	2.99747e-34	1.55343e-30
7	555000	7	605000	157	1.56099e-33	7.83558e-30
12	1275000	7	815000	39	3.23527e-33	1.59162e-29
14	1075000	7	815000	31	5.98068e-33	2.91062e-29
12	1285000	2	455000	30	1.04603e-32	5.00108e-29
1	455000	2	445000	27	1.80691e-32	8.54855e-29
7	815000	8	295000	35	2.45353e-32	1.15674e-28
11	1655000	11	1685000	341	2.52993e-32	1.19069e-28
14	1075000	8	295000	28	3.32357e-32	1.55613e-28
1	465000	7	815000	35	5.05869e-32	2.3523e-28
10	945000	7	815000	38	6.60896e-32	3.05228e-28
11	825000	5	455000	28	1.44496e-31	6.55084e-28
13	1175000	14	1075000	31	2.64765e-31	1.18647e-27
2	455000	7	815000	33	3.40391e-31	1.52285e-27
3	595000	8	295000	31	3.96903e-31	1.76984e-27
12	1285000	8	305000	22	7.28789e-31	3.17674e-27
5	465000	6	475000	37	7.41123e-31	3.22533e-27
12	1695000	12	1725000	135	1.96639e-30	8.36986e-27
12	1285000	5	465000	31	2.73916e-30	1.15505e-26
1	465000	6	485000	29	2.83214e-30	1.1924e-26
11	825000	6	475000	41	2.90372e-30	1.22065e-26
12	1285000	2	445000	30	2.97387e-30	1.24628e-26
12	1285000	8	295000	29	5.30177e-30	2.19475e-26
5	445000	7	815000	41	7.33713e-30	3.02809e-26
12	1285000	9	1245000	23	1.61462e-29	6.5541e-26
13	2615000	13	2645000	193	1.75547e-29	7.10458e-26
13	1175000	2	455000	33	1.82615e-29	7.37964e-26
7	535000	7	565000	131	2.23707e-29	8.97345e-26
13	1175000	2	445000	35	3.4264e-29	1.36634e-25
5	885000	5	915000	214	1.90746e-28	7.36833e-25
1	465000	3	605000	27	4.55406e-28	1.73939e-24
11	835000	6	475000	30	5.40361e-28	2.06097e-24
1	465000	9	1245000	23	5.46506e-28	2.08149e-24
4	645000	8	295000	21	1.10233e-27	4.12897e-24
13	195000	13	225000	143	1.8458e-27	6.85701e-24
11	825000	14	1075000	29	2.30933e-27	8.55559e-24
12	1285000	4	645000	20	3.55837e-27	1.31115e-23
9	255000	9	285000	296	4.39378e-27	1.61459e-23
7	155000	7	185000	252	5.35684e-27	1.95526e-23
7	815000	8	305000	22	7.87857e-27	2.8451e-23
10	935000	8	305000	18	9.1668e-27	3.2841e-23
6	1335000	6	1365000	84	9.43666e-27	3.37633e-23
10	945000	13	1175000	35	1.49069e-26	5.28476e-23
13	1175000	7	815000	35	2.63458e-26	9.26751e-23
1	465000	5	445000	34	3.10014e-26	1.0835e-22
1	465000	14	1075000	24	4.64337e-26	1.61042e-22
14	3225000	14	3255000	76	5.5174e-26	1.899e-22
4	645000	6	475000	22	6.34487e-26	2.17828e-22
1	455000	13	1175000	25	6.77616e-26	2.32048e-22
4	55000	4	1165000	36	7.01127e-26	2.39797e-22
13	275000	13	305000	149	1.22694e-25	4.13386e-22
2	455000	8	295000	26	1.52125e-25	5.09388e-22
14	1785000	14	1815000	227	1.64469e-25	5.48691e-22
1	465000	2	455000	26	2.61207e-25	8.65046e-22
1	465000	11	825000	32	2.92931e-25	9.65397e-22
11	825000	5	445000	40	3.59243e-25	1.17822e-21
13	185000	13	215000	213	3.67966e-25	1.20537e-21
8	435000	8	465000	146	3.77942e-25	1.23507e-21
1	465000	6	475000	30	6.72227e-25	2.16293e-21
1	465000	8	305000	19	2.05946e-24	6.50314e-21
9	215000	9	245000	192	2.35975e-24	7.4083e-21
12	1285000	6	475000	28	2.37917e-24	7.46065e-21
13	1175000	6	475000	34	3.18859e-24	9.89597e-21
11	835000	12	1285000	23	4.136e-24	1.27489e-20
12	1885000	12	1915000	169	4.87988e-24	1.50248e-20
4	655000	7	815000	28	5.43322e-24	1.65781e-20
10	945000	2	445000	29	5.8598e-24	1.78597e-20
10	935000	7	815000	24	7.40294e-24	2.2412e-20
13	205000	13	235000	235	8.34343e-24	2.51471e-20
8	425000	8	465000	149	8.8992e-24	2.67628e-20
1	465000	10	935000	22	1.01817e-23	3.04174e-20
11	2005000	11	2035000	77	1.07475e-23	3.20727e-20
2	445000	4	645000	19	1.2031e-23	3.5785e-20
12	15000	12	55000	81	1.32573e-23	3.92603e-20
5	1245000	5	1275000	230	1.51784e-23	4.48518e-20
13	2885000	9	25000	16	1.52724e-23	4.49875e-20
4	1135000	4	1165000	94	1.58269e-23	4.64647e-20
10	935000	2	455000	21	2.08966e-23	6.10185e-20
11	825000	2	455000	29	2.32234e-23	6.76672e-20
13	1175000	8	295000	29	2.44275e-23	7.10231e-20
14	2165000	14	2195000	247	2.96057e-23	8.58948e-20
10	935000	14	1075000	19	3.17114e-23	9.18082e-20
7	525000	7	555000	79	3.41504e-23	9.8764e-20
11	825000	5	465000	32	5.03956e-23	1.4482e-19
10	945000	11	825000	33	5.12727e-23	1.47029e-19
2	455000	3	595000	24	6.01186e-23	1.71738e-19
2	445000	6	475000	29	6.70825e-23	1.91355e-19
12	2215000	12	2245000	68	7.89566e-23	2.24519e-19
7	815000	9	1235000	28	9.67292e-23	2.74769e-19
12	1285000	3	605000	22	1.0026e-22	2.84502e-19
11	1625000	11	1655000	223	1.06793e-22	3.02094e-19
12	335000	12	365000	171	1.18689e-22	3.35044e-19
14	1075000	4	645000	16	1.30125e-22	3.66185e-19
3	605000	5	445000	28	1.50744e-22	4.22458e-19
10	935000	8	295000	21	1.70639e-22	4.77228e-19
13	1175000	5	455000	21	1.95323e-22	5.4514e-19
7	535000	7	605000	83	2.0761e-22	5.78244e-19
11	835000	13	1175000	26	2.2874e-22	6.35143e-19
2	445000	8	305000	18	2.92633e-22	8.1007e-19
13	1175000	3	595000	28	3.07224e-22	8.4873e-19
12	1275000	14	1075000	23	3.1073e-22	8.56673e-19
14	2035000	14	2075000	183	3.64154e-22	1.00091e-18
13	1175000	5	465000	30	3.93171e-22	1.0774e-18
10	935000	5	465000	22	4.04804e-22	1.10704e-18
5	445000	8	295000	30	4.25142e-22	1.158e-18
14	1075000	3	595000	21	4.70495e-22	1.28024e-18
8	425000	8	455000	114	4.88861e-22	1.32756e-18
2	445000	7	805000	24	5.51962e-22	1.49294e-18
2	455000	4	645000	17	6.29596e-22	1.69954e-18
5	1245000	5	1285000	151	6.42737e-22	1.72986e-18
8	1085000	8	1115000	253	6.89174e-22	1.84751e-18
11	1845000	11	1885000	146	7.00568e-22	1.87436e-18
12	465000	12	495000	228	1.30122e-21	3.43403e-18
6	475000	7	805000	26	1.35315e-21	3.56761e-18
11	1855000	11	1885000	209	1.48836e-21	3.91649e-18
11	835000	3	595000	22	1.59007e-21	4.16797e-18
8	305000	9	1245000	14	2.11965e-21	5.54008e-18
2	445000	5	465000	26	2.30618e-21	6.01605e-18
11	1995000	11	2025000	77	2.43425e-21	6.32581e-18
13	1175000	9	1235000	28	2.63424e-21	6.83898e-18
2	445000	9	1245000	19	2.66851e-21	6.91474e-18
12	1295000	6	475000	30	3.0694e-21	7.91576e-18
10	935000	4	645000	15	3.15512e-21	8.12141e-18
14	2385000	14	2425000	175	3.66771e-21	9.42299e-18
7	545000	7	595000	74	4.36693e-21	1.11666e-17
5	1315000	5	1345000	54	4.81004e-21	1.22765e-17
1	465000	4	645000	17	5.04434e-21	1.28504e-17
5	445000	8	305000	20	5.44969e-21	1.387e-17
7	985000	7	1015000	201	6.18264e-21	1.56766e-17
1	465000	9	1235000	24	6.81271e-21	1.7242e-17
1	465000	12	1295000	26	9.64965e-21	2.42637e-17
2	445000	3	605000	22	1.18189e-20	2.95812e-17
14	1085000	2	445000	28	1.30037e-20	3.24568e-17
11	825000	6	495000	34	1.43042e-20	3.56046e-17
3	595000	6	475000	26	1.46631e-20	3.64645e-17
11	545000	7	775000	25	1.47326e-20	3.66038e-17
4	635000	6	485000	21	2.10945e-20	5.19352e-17
12	35000	12	2245000	29	2.65575e-20	6.50316e-17
11	825000	12	1285000	26	2.70525e-20	6.6184e-17
10	945000	11	835000	23	3.53862e-20	8.60161e-17
11	835000	8	295000	21	3.53806e-20	8.60161e-17
11	825000	9	1235000	28	3.61587e-20	8.76724e-17
14	1075000	6	475000	22	4.67672e-20	1.12991e-16
12	1295000	2	445000	26	5.24685e-20	1.26316e-16
11	825000	8	295000	27	5.8339e-20	1.39829e-16
14	325000	14	355000	254	5.84754e-20	1.40032e-16
8	1075000	8	1115000	148	6.68293e-20	1.59756e-16
14	2755000	14	2785000	222	6.72411e-20	1.60599e-16
11	475000	11	505000	215	7.97218e-20	1.88912e-16
12	1285000	13	1155000	23	8.84791e-20	2.08935e-16
12	1275000	6	485000	23	9.22102e-20	2.17556e-16
12	1275000	6	475000	28	9.31437e-20	2.19568e-16
11	835000	2	455000	20	9.58681e-20	2.25599e-16
5	455000	6	485000	16	1.10153e-19	2.58319e-16
11	825000	6	485000	25	1.26154e-19	2.94825e-16
11	465000	11	495000	215	1.42429e-19	3.31717e-16
7	545000	7	585000	79	1.47361e-19	3.42616e-16
1	465000	6	495000	27	1.48772e-19	3.45602e-16
7	565000	7	595000	92	1.84244e-19	4.24374e-16
14	2505000	14	2535000	226	1.86953e-19	4.30248e-16
11	835000	3	605000	19	1.98028e-19	4.54965e-16
8	1105000	8	1135000	169	2.01306e-19	4.61323e-16
7	535000	7	595000	65	2.42151e-19	5.52132e-16
14	1075000	8	305000	14	2.52765e-19	5.75367e-16
13	1935000	13	1965000	135	2.92605e-19	6.63829e-16
12	25000	12	2245000	17	2.93133e-19	6.6447e-16
12	2195000	14	3255000	15	3.42041e-19	7.72755e-16
11	835000	9	1245000	16	3.44407e-19	7.77453e-16
10	945000	4	645000	17	3.48735e-19	7.8657e-16
11	825000	9	1245000	20	3.68905e-19	8.29996e-16
12	685000	12	715000	288	4.23866e-19	9.51286e-16
11	825000	12	1275000	29	5.0673e-19	1.13351e-15
8	1115000	8	1145000	225	5.29895e-19	1.18436e-15
10	945000	2	455000	23	5.39648e-19	1.20516e-15
1	465000	10	945000	24	5.99931e-19	1.33759e-15
14	1065000	7	815000	21	6.49042e-19	1.4459e-15
6	1235000	6	1265000	344	7.06618e-19	1.56901e-15
14	205000	14	245000	120	7.61674e-19	1.68988e-15
10	935000	13	1175000	21	8.19925e-19	1.81615e-15
14	1065000	8	295000	19	8.53853e-19	1.88669e-15
3	595000	9	1235000	22	9.81062e-19	2.15899e-15
1	455000	10	935000	15	1.00218e-18	2.20368e-15
1	465000	11	835000	20	1.04222e-18	2.28247e-15
4	125000	4	165000	85	1.16664e-18	2.54469e-15
10	935000	3	605000	17	1.2249e-18	2.66964e-15
10	935000	11	835000	17	1.23171e-18	2.68232e-15
6	475000	9	1235000	25	1.31851e-18	2.86675e-15
1	465000	12	1305000	21	1.37236e-18	2.9743e-15
14	3245000	9	65000	11	1.477e-18	3.19344e-15
1	455000	11	835000	16	1.61486e-18	3.4832e-15
5	455000	9	1245000	13	1.7322e-18	3.72446e-15
6	485000	8	295000	20	1.8022e-18	3.86885e-15
4	935000	4	985000	93	1.86921e-18	4.00004e-15
10	215000	10	245000	208	2.04291e-18	4.36488e-15
1	465000	5	455000	16	2.50505e-18	5.33132e-15
7	815000	9	1245000	18	2.55643e-18	5.43641e-15
14	215000	14	245000	149	3.19775e-18	6.76314e-15
13	1175000	4	645000	17	3.74292e-18	7.88544e-15
11	835000	2	445000	20	3.93947e-18	8.28024e-15
1	465000	8	295000	21	5.23115e-18	1.09275e-14
9	515000	9	545000	223	6.68573e-18	1.38489e-14
12	1285000	5	455000	15	7.37372e-18	1.52391e-14
11	2025000	6	5000	19	7.62725e-18	1.57391e-14
11	1995000	11	2035000	51	7.68278e-18	1.58417e-14
6	475000	9	1245000	18	8.90588e-18	1.82666e-14
2	445000	6	485000	20	1.0245e-17	2.08712e-14
14	1735000	14	1765000	335	1.05102e-17	2.13955e-14
11	835000	6	485000	18	1.05609e-17	2.14826e-14
1	455000	2	455000	16	1.14028e-17	2.31606e-14
10	935000	2	445000	18	1.17245e-17	2.37785e-14
14	3245000	14	3275000	53	1.19523e-17	2.42224e-14
14	3195000	14	3225000	76	1.64033e-17	3.30208e-14
1	465000	5	465000	22	1.85195e-17	3.70611e-14
14	1555000	14	1585000	211	2.02859e-17	4.04767e-14
14	2675000	14	2705000	154	2.25249e-17	4.48452e-14
11	1325000	11	1355000	124	2.62759e-17	5.2122e-14
11	1835000	11	1875000	153	2.69565e-17	5.34331e-14
4	1135000	4	1175000	58	2.80105e-17	5.54011e-14
5	915000	5	945000	236	2.87706e-17	5.68631e-14
12	35000	12	65000	84	2.99862e-17	5.91795e-14
12	1275000	2	445000	23	3.04775e-17	6.01054e-14
12	1665000	12	1695000	179	3.14304e-17	6.18948e-14
12	1285000	14	1065000	17	3.81238e-17	7.47506e-14
12	1275000	13	1175000	26	3.83111e-17	7.50636e-14
5	1345000	6	5000	14	4.2859e-17	8.36725e-14
14	1085000	7	795000	31	4.33481e-17	8.45667e-14
14	2135000	14	2165000	225	4.94095e-17	9.61843e-14
5	455000	8	295000	15	5.24899e-17	1.01962e-13
12	1285000	6	485000	18	5.36363e-17	1.0404e-13
10	945000	3	595000	22	5.84746e-17	1.13182e-13
3	595000	5	445000	25	6.44586e-17	1.24322e-13
14	655000	14	685000	251	6.76721e-17	1.30334e-13
12	1635000	12	1665000	175	7.16996e-17	1.37798e-13
11	1845000	11	1875000	157	7.41986e-17	1.425e-13
2	455000	5	475000	22	1.04421e-16	1.99135e-13
10	935000	8	315000	18	1.06378e-16	2.02725e-13
12	1665000	12	1755000	121	1.13579e-16	2.15992e-13
13	205000	13	315000	93	1.17906e-16	2.24063e-13
7	25000	7	555000	28	1.23402e-16	2.34017e-13
10	945000	3	605000	20	1.29634e-16	2.45663e-13
14	1085000	5	445000	30	1.37905e-16	2.60792e-13
13	1175000	3	605000	21	1.4888e-16	2.81154e-13
5	465000	8	295000	21	1.58399e-16	2.98301e-13
11	825000	12	1295000	27	1.64057e-16	3.08529e-13
11	835000	8	305000	13	1.78816e-16	3.35124e-13
4	935000	4	975000	94	1.87298e-16	3.50296e-13
1	445000	9	1235000	17	1.88326e-16	3.51976e-13
4	1005000	4	1035000	330	1.98433e-16	3.70356e-13
7	535000	7	575000	58	2.09003e-16	3.89816e-13
1	465000	13	1165000	13	2.14633e-16	3.99767e-13
3	605000	8	295000	18	2.24474e-16	4.17238e-13
14	3065000	14	3095000	120	2.2897e-16	4.25013e-13
12	1275000	4	645000	15	2.33968e-16	4.33697e-13
13	1175000	4	635000	22	2.52989e-16	4.67679e-13
12	295000	12	335000	153	2.6381e-16	4.87021e-13
11	1855000	11	1895000	93	2.70659e-16	4.98648e-13
11	825000	8	305000	16	2.94145e-16	5.4045e-13
2	455000	5	465000	20	2.96048e-16	5.43578e-13
10	1615000	10	1645000	43	3.12484e-16	5.72596e-13
3	605000	9	1245000	14	3.42554e-16	6.26006e-13
2	455000	5	455000	14	3.55776e-16	6.49732e-13
8	1135000	8	1175000	207	3.71062e-16	6.76284e-13
9	815000	9	845000	224	4.42396e-16	8.00918e-13
5	835000	5	865000	165	4.71438e-16	8.51227e-13
14	115000	14	145000	192	4.82221e-16	8.70118e-13
7	515000	7	555000	85	5.77198e-16	1.03667e-12
2	455000	6	475000	21	6.02649e-16	1.08024e-12
11	1475000	11	1515000	171	6.04439e-16	1.08273e-12
9	165000	9	205000	104	6.14293e-16	1.09966e-12
14	3075000	14	3105000	206	6.19583e-16	1.1084e-12
14	2985000	14	3015000	151	6.53369e-16	1.165e-12
3	605000	6	475000	20	6.93538e-16	1.235e-12
11	1185000	11	1215000	179	7.03674e-16	1.25223e-12
10	945000	14	1075000	18	7.08991e-16	1.26087e-12
9	505000	9	535000	152	7.2402e-16	1.28591e-12
11	545000	7	785000	23	7.32309e-16	1.29978e-12
10	945000	8	295000	21	7.81316e-16	1.38315e-12
1	455000	6	475000	17	8.95055e-16	1.57322e-12
3	595000	7	815000	21	1.0137e-15	1.77831e-12
2	445000	4	635000	19	1.02454e-15	1.79501e-12
1	465000	12	1275000	21	1.05155e-15	1.83878e-12
4	975000	4	1165000	39	1.06934e-15	1.86867e-12
13	1855000	13	1885000	188	1.13778e-15	1.9819e-12
2	445000	7	795000	25	1.15622e-15	2.01272e-12
14	375000	14	405000	175	1.17271e-15	2.03882e-12
10	945000	6	475000	24	1.20026e-15	2.08404e-12
12	1295000	13	1175000	25	1.20776e-15	2.09572e-12
12	1285000	13	1165000	12	1.23108e-15	2.13483e-12
2	445000	9	1235000	20	1.26472e-15	2.18758e-12
11	825000	7	795000	30	1.27199e-15	2.19704e-12
1	55000	2	65000	11	1.31024e-15	2.25768e-12
14	3025000	14	3055000	97	1.34464e-15	2.31549e-12
3	595000	5	455000	14	1.36713e-15	2.35273e-12
7	795000	8	295000	24	1.41257e-15	2.42939e-12
8	1095000	8	1125000	162	1.42776e-15	2.45396e-12
6	5000	6	35000	47	1.55329e-15	2.66128e-12
12	1275000	3	605000	19	1.62921e-15	2.78433e-12
2	465000	3	625000	27	1.78135e-15	3.03862e-12
1	465000	13	1175000	22	1.82305e-15	3.10583e-12
2	455000	9	1245000	14	1.90028e-15	3.23539e-12
14	1065000	4	635000	16	1.95029e-15	3.31844e-12
1	455000	4	645000	11	2.08386e-15	3.54128e-12
7	185000	7	225000	194	2.24479e-15	3.81e-12
10	945000	4	635000	20	2.24737e-15	3.81198e-12
7	565000	7	605000	96	2.27878e-15	3.86286e-12
12	1365000	12	1395000	356	2.29273e-15	3.88165e-12
12	1285000	14	1085000	21	2.40151e-15	4.05571e-12
4	55000	4	1175000	22	2.45627e-15	4.14047e-12
13	2495000	13	2525000	127	2.57326e-15	4.33498e-12
4	635000	9	1245000	14	2.73817e-15	4.60422e-12
4	635000	8	295000	18	3.02414e-15	5.06625e-12
13	2275000	13	2305000	159	3.27645e-15	5.48218e-12
11	35000	8	1415000	15	3.2816e-15	5.48742e-12
13	245000	13	275000	93	3.3223e-15	5.55205e-12
14	1075000	6	485000	15	3.51027e-15	5.86257e-12
2	445000	3	595000	19	3.68023e-15	6.1351e-12
7	555000	7	1425000	28	3.75677e-15	6.24737e-12
13	1175000	14	1085000	26	3.88372e-15	6.45452e-12
9	225000	9	255000	227	4.22031e-15	7.00105e-12
7	1195000	7	1225000	185	4.48368e-15	7.43343e-12
12	25000	12	55000	57	4.54254e-15	7.52182e-12
1	465000	14	1085000	22	4.80562e-15	7.93808e-12
13	2725000	13	2765000	85	4.96507e-15	8.1915e-12
12	1285000	4	635000	17	5.06495e-15	8.35122e-12
1	455000	7	815000	16	5.16108e-15	8.4994e-12
7	1115000	7	1145000	135	5.20762e-15	8.56565e-12
7	515000	7	565000	56	6.01557e-15	9.87068e-12
3	605000	5	465000	18	6.15005e-15	1.00852e-11
4	55000	4	975000	23	6.57659e-15	1.07458e-11
11	35000	6	5000	18	6.84001e-15	1.11695e-11
9	705000	9	735000	180	6.96094e-15	1.13533e-11
13	1175000	14	1055000	27	7.44432e-15	1.21271e-11
11	825000	3	595000	22	8.25897e-15	1.3406e-11
1	465000	14	1065000	16	8.65856e-15	1.40462e-11
11	835000	4	645000	12	8.71331e-15	1.4123e-11
10	975000	10	1005000	215	9.0397e-15	1.46208e-11
13	285000	13	315000	205	1.00378e-14	1.62159e-11
6	1355000	6	1385000	48	1.03617e-14	1.67291e-11
4	1165000	6	1365000	17	1.04863e-14	1.69202e-11
10	945000	14	1085000	24	1.09214e-14	1.76013e-11
1	455000	11	825000	17	1.09287e-14	1.76027e-11
4	645000	5	455000	10	1.10545e-14	1.77947e-11
11	35000	5	1335000	18	1.12385e-14	1.80786e-11
11	35000	11	75000	32	1.19028e-14	1.90699e-11
11	1485000	11	1515000	121	1.27186e-14	2.0317e-11
1	455000	5	455000	11	1.28469e-14	2.05099e-11
4	635000	5	455000	13	1.42483e-14	2.27071e-11
12	265000	12	295000	181	1.55184e-14	2.46733e-11
12	1285000	3	595000	17	1.60635e-14	2.55251e-11
9	475000	9	515000	165	1.66029e-14	2.63666e-11
10	945000	9	1245000	15	1.71004e-14	2.71409e-11
14	2855000	14	2895000	106	1.75679e-14	2.78666e-11
7	795000	9	1245000	17	1.76499e-14	2.7964e-11
13	2565000	13	2595000	121	1.77399e-14	2.80902e-11
1	475000	2	445000	17	1.80566e-14	2.8575e-11
5	445000	6	485000	21	1.82026e-14	2.87893e-11
11	35000	11	2035000	20	1.9698e-14	3.1082e-11
1	465000	7	795000	23	2.0328e-14	3.20389e-11
1	455000	5	465000	15	2.18305e-14	3.4387e-11
14	1075000	9	1245000	12	2.25953e-14	3.55408e-11
9	655000	9	685000	244	2.2605e-14	3.55408e-11
13	1175000	2	425000	25	2.34631e-14	3.6844e-11
11	265000	11	305000	177	2.4181e-14	3.79354e-11
14	3255000	9	65000	8	2.46024e-14	3.85742e-11
1	455000	8	295000	14	2.91134e-14	4.55419e-11
9	125000	9	155000	196	2.94269e-14	4.60059e-11
1	465000	5	435000	18	3.0065e-14	4.69763e-11
5	1215000	5	1245000	163	3.06418e-14	4.785e-11
8	455000	8	485000	154	3.19066e-14	4.97679e-11
4	735000	4	775000	131	3.22116e-14	5.02149e-11
7	785000	7	815000	230	3.27748e-14	5.10635e-11
10	945000	5	465000	21	3.32182e-14	5.1695e-11
14	3045000	14	3075000	158	3.45722e-14	5.37405e-11
14	1075000	3	605000	14	3.6574e-14	5.67549e-11
3	605000	4	655000	16	3.71696e-14	5.75803e-11
6	1005000	6	1035000	157	3.77279e-14	5.84118e-11
14	1055000	8	315000	24	3.80399e-14	5.88614e-11
14	3205000	14	3245000	47	3.81929e-14	5.90645e-11
12	1295000	2	455000	19	3.83474e-14	5.92696e-11
5	465000	7	815000	21	4.63518e-14	7.15192e-11
12	305000	12	335000	113	4.67084e-14	7.20284e-11
12	365000	12	405000	100	4.6873e-14	7.22413e-11
14	2655000	14	2685000	120	4.71324e-14	7.25997e-11
13	185000	13	225000	100	4.74465e-14	7.30422e-11
5	1275000	7	1115000	26	4.90041e-14	7.53546e-11
2	315000	2	345000	247	4.94016e-14	7.59228e-11
4	645000	5	465000	13	5.22416e-14	8.01968e-11
14	1085000	3	605000	19	5.40138e-14	8.28236e-11
9	215000	9	255000	193	5.52991e-14	8.47466e-11
10	965000	8	255000	29	5.77313e-14	8.84242e-11
7	555000	7	1375000	22	6.33275e-14	9.66141e-11
1	455000	6	485000	13	6.44647e-14	9.82938e-11
11	1985000	11	2025000	77	6.56621e-14	1.00007e-10
13	1165000	2	455000	11	6.69014e-14	1.01667e-10
11	2035000	6	5000	14	6.69981e-14	1.01757e-10
5	1215000	5	1265000	140	6.75548e-14	1.02545e-10
11	1955000	11	1985000	199	6.95086e-14	1.05393e-10
14	705000	14	735000	197	6.98593e-14	1.05807e-10
1	455000	14	1075000	12	7.18457e-14	1.08694e-10
7	25000	7	1425000	16	7.43277e-14	1.12386e-10
5	885000	5	945000	98	7.46274e-14	1.12777e-10
13	2075000	13	2105000	179	7.63345e-14	1.15292e-10
1	455000	9	1235000	14	8.32564e-14	1.2519e-10
9	155000	9	185000	152	8.66501e-14	1.30076e-10
5	865000	5	895000	177	8.83099e-14	1.32495e-10
12	1275000	8	295000	19	9.18157e-14	1.37679e-10
7	225000	7	255000	181	9.29924e-14	1.39289e-10
4	755000	4	785000	190	9.33876e-14	1.39804e-10
11	855000	5	475000	26	9.43438e-14	1.4108e-10
4	565000	7	525000	9	9.47117e-14	1.41552e-10
4	1165000	7	555000	20	9.80014e-14	1.46388e-10
11	2035000	5	1335000	14	9.9459e-14	1.48402e-10
11	35000	12	2245000	16	1.06954e-13	1.59149e-10
4	645000	8	305000	9	1.07631e-13	1.60069e-10
13	1175000	5	445000	26	1.1551e-13	1.71504e-10
6	495000	8	295000	21	1.16474e-13	1.72841e-10
10	945000	12	1285000	18	1.18535e-13	1.75708e-10
11	1835000	11	1865000	168	1.18592e-13	1.75708e-10
13	1745000	13	1775000	258	1.27638e-13	1.88748e-10
14	2385000	14	2415000	130	1.34227e-13	1.98102e-10
12	295000	12	325000	134	1.37884e-13	2.03279e-10
14	1075000	9	1235000	15	1.38058e-13	2.03401e-10
1	455000	14	1065000	12	1.45795e-13	2.14244e-10
13	985000	13	1015000	145	1.47232e-13	2.16238e-10
1	475000	11	825000	19	1.51799e-13	2.22705e-10
11	25000	11	55000	36	1.59283e-13	2.33433e-10
6	15000	6	1355000	12	1.6162e-13	2.36602e-10
11	1635000	11	1665000	111	1.74859e-13	2.55433e-10
12	1275000	2	455000	18	1.79264e-13	2.61586e-10
12	1275000	7	805000	18	1.82701e-13	2.66315e-10
2	155000	2	185000	190	1.8489e-13	2.69073e-10
12	335000	12	395000	127	1.86099e-13	2.70687e-10
12	1675000	12	1705000	104	1.9129e-13	2.77791e-10
8	1085000	8	1135000	148	2.03258e-13	2.94541e-10
3	915000	3	945000	194	2.0902e-13	3.02569e-10
12	1725000	7	555000	18	2.118e-13	3.06429e-10
12	345000	12	385000	133	2.22293e-13	3.2094e-10
9	265000	9	295000	181	2.22184e-13	3.2094e-10
5	1345000	7	1165000	14	2.26691e-13	3.26929e-10
4	55000	4	1125000	24	2.40478e-13	3.4626e-10
5	445000	6	475000	25	2.42597e-13	3.49126e-10
5	855000	5	895000	180	2.60579e-13	3.74372e-10
14	3235000	9	65000	8	2.80837e-13	4.01869e-10
3	605000	4	645000	11	2.85039e-13	4.07398e-10
12	1295000	9	1255000	21	2.93781e-13	4.19451e-10
11	465000	11	505000	201	2.96102e-13	4.2232e-10
7	1185000	7	1215000	163	3.33665e-13	4.7465e-10
13	375000	13	405000	126	3.34695e-13	4.75865e-10
6	495000	7	785000	28	3.4499e-13	4.90245e-10
2	345000	2	375000	266	3.56274e-13	5.06016e-10
10	935000	3	595000	14	3.60114e-13	5.10935e-10
14	1755000	14	1815000	121	3.63202e-13	5.15048e-10
14	1795000	14	1825000	129	3.73583e-13	5.2894e-10
14	2035000	14	2065000	135	3.95113e-13	5.5855e-10
9	425000	9	455000	264	3.9623e-13	5.59838e-10
10	945000	9	1235000	19	3.9849e-13	5.62446e-10
12	1285000	5	445000	20	4.01645e-13	5.66604e-10
3	605000	7	815000	17	4.0697e-13	5.73521e-10
11	835000	7	815000	17	4.09129e-13	5.76264e-10
12	1335000	14	1125000	23	4.11883e-13	5.79541e-10
4	635000	7	815000	18	4.15452e-13	5.8426e-10
6	1195000	6	1235000	188	4.31922e-13	6.06167e-10
13	1165000	6	475000	12	4.32335e-13	6.06434e-10
11	1815000	11	1865000	130	4.33827e-13	6.08212e-10
13	1175000	5	475000	23	4.541e-13	6.36306e-10
3	145000	3	935000	31	4.58467e-13	6.41763e-10
4	145000	4	935000	31	4.62686e-13	6.47334e-10
12	1475000	12	1505000	251	4.67764e-13	6.53767e-10
11	55000	2	875000	9	4.84927e-13	6.77056e-10
14	335000	14	375000	176	4.9313e-13	6.88155e-10
8	295000	9	1235000	17	4.98777e-13	6.95678e-10
4	55000	7	545000	16	5.04036e-13	7.02292e-10
12	1295000	7	815000	21	5.24504e-13	7.30062e-10
14	2865000	14	2895000	155	5.28283e-13	7.34946e-10
1	465000	9	1225000	17	5.38289e-13	7.47716e-10
5	185000	5	215000	137	5.5352e-13	7.68481e-10
14	1085000	6	475000	23	5.62514e-13	7.79771e-10
1	455000	3	595000	13	5.69139e-13	7.88553e-10
11	1215000	11	1245000	173	5.77006e-13	7.9823e-10
5	865000	5	915000	144	5.80117e-13	8.02125e-10
12	495000	12	535000	131	5.84527e-13	8.07401e-10
13	1175000	6	485000	18	6.19593e-13	8.54968e-10
11	1335000	11	1365000	177	6.20904e-13	8.56341e-10
12	335000	12	385000	131	6.30603e-13	8.69276e-10
12	745000	12	785000	126	6.62604e-13	9.10155e-10
12	1675000	12	1755000	106	6.65827e-13	9.1412e-10
10	25000	10	1645000	13	6.70462e-13	9.19554e-10
2	35000	2	65000	38	6.73438e-13	9.23169e-10
6	495000	9	1245000	15	6.99907e-13	9.58486e-10
9	805000	9	845000	137	7.25861e-13	9.93527e-10
12	35000	8	45000	19	7.32762e-13	1.00247e-09
11	835000	14	1075000	13	7.42754e-13	1.01563e-09
11	815000	14	1085000	23	7.4454e-13	1.01756e-09
11	1985000	11	2035000	53	7.53691e-13	1.02954e-09
14	3045000	14	3085000	168	7.85046e-13	1.07076e-09
9	1465000	9	1495000	38	7.85429e-13	1.07076e-09
12	1755000	12	1785000	188	7.87595e-13	1.07262e-09
1	465000	4	635000	16	8.12033e-13	1.10424e-09
5	1235000	5	1265000	141	8.69155e-13	1.17838e-09
8	1075000	8	1135000	92	8.97625e-13	1.21576e-09
3	595000	7	795000	21	8.9977e-13	1.21745e-09
9	185000	9	215000	136	9.63497e-13	1.30109e-09
8	1125000	8	1155000	144	9.84268e-13	1.32848e-09
8	1075000	8	1125000	106	1.00148e-12	1.35036e-09
13	605000	13	635000	151	1.00414e-12	1.35328e-09
13	1155000	6	495000	22	1.01154e-12	1.36258e-09
8	1405000	8	1435000	64	1.01468e-12	1.36613e-09
13	1075000	13	1105000	133	1.02997e-12	1.38603e-09
14	3015000	14	3095000	123	1.07167e-12	1.43858e-09
12	1275000	5	455000	13	1.09228e-12	1.46553e-09
10	945000	9	1255000	20	1.09852e-12	1.47317e-09
12	1705000	12	1735000	53	1.12506e-12	1.50727e-09
4	555000	4	615000	53	1.12729e-12	1.50951e-09
3	605000	6	485000	14	1.17762e-12	1.57535e-09
8	485000	8	515000	218	1.18781e-12	1.58742e-09
12	1705000	4	1165000	14	1.19463e-12	1.59574e-09
4	115000	4	145000	114	1.26359e-12	1.68621e-09
14	2365000	14	2405000	158	1.31441e-12	1.75144e-09
10	935000	14	1065000	12	1.3519e-12	1.79963e-09
4	1125000	4	1165000	98	1.3664e-12	1.81625e-09
14	1805000	14	1835000	118	1.40315e-12	1.8642e-09
8	1095000	8	1135000	124	1.42364e-12	1.88864e-09
7	505000	7	535000	113	1.42502e-12	1.88955e-09
13	135000	13	205000	114	1.50182e-12	1.98847e-09
14	715000	14	745000	187	1.55025e-12	2.0506e-09
13	255000	13	305000	134	1.57008e-12	2.07582e-09
1	465000	4	655000	16	1.58848e-12	2.09817e-09
4	895000	4	935000	188	1.58776e-12	2.09817e-09
13	1165000	5	465000	11	1.63566e-12	2.15937e-09
12	465000	12	505000	143	1.65365e-12	2.18205e-09
9	495000	9	525000	119	1.66728e-12	2.19791e-09
13	1175000	9	1255000	21	1.80529e-12	2.37869e-09
14	1085000	8	315000	21	1.96783e-12	2.58784e-09
14	2355000	14	2395000	100	2.02179e-12	2.65493e-09
4	115000	4	1125000	21	2.06993e-12	2.71684e-09
13	1155000	2	445000	18	2.07281e-12	2.7193e-09
7	25000	7	545000	19	2.0964e-12	2.74892e-09
11	835000	9	1225000	15	2.10283e-12	2.75602e-09
4	45000	4	1165000	16	2.34092e-12	3.06363e-09
13	595000	13	625000	176	2.37472e-12	3.10487e-09
3	595000	8	305000	11	2.42672e-12	3.16677e-09
12	1275000	6	495000	22	2.45057e-12	3.19635e-09
8	35000	8	1435000	17	2.57134e-12	3.34905e-09
14	745000	14	775000	152	2.61902e-12	3.40789e-09
2	25000	2	55000	39	2.66202e-12	3.46217e-09
13	565000	13	595000	141	2.74994e-12	3.56968e-09
1	35000	8	1465000	7	2.78097e-12	3.60652e-09
7	575000	7	605000	64	3.07413e-12	3.9791e-09
5	905000	5	935000	107	3.12987e-12	4.04932e-09
6	345000	6	375000	210	3.18747e-12	4.12187e-09
13	2205000	13	2235000	208	3.22761e-12	4.1718e-09
13	2855000	13	2885000	32	3.27332e-12	4.22887e-09
10	935000	5	455000	10	3.38182e-12	4.36489e-09
6	455000	7	785000	25	3.42503e-12	4.41856e-09
3	595000	9	1245000	12	3.50755e-12	4.51858e-09
8	295000	9	1245000	12	3.67663e-12	4.7319e-09
4	545000	4	605000	60	3.68861e-12	4.74282e-09
2	465000	5	475000	21	3.78654e-12	4.86644e-09
3	185000	3	215000	155	3.7915e-12	4.87051e-09
12	1275000	3	585000	16	3.80679e-12	4.88784e-09
11	35000	7	45000	11	3.83728e-12	4.92466e-09
11	1185000	11	1225000	193	3.89749e-12	4.99791e-09
7	815000	9	1225000	18	3.96188e-12	5.07737e-09
10	1435000	10	1475000	64	3.97866e-12	5.09647e-09
12	1665000	12	1765000	76	4.10759e-12	5.25666e-09
7	535000	7	585000	57	4.14283e-12	5.29927e-09
1	195000	1	305000	120	4.19704e-12	5.36608e-09
5	95000	5	935000	26	4.22569e-12	5.39509e-09
4	655000	7	795000	20	4.53594e-12	5.77761e-09
2	25000	8	45000	14	4.67398e-12	5.95065e-09
14	1765000	14	1815000	145	4.68921e-12	5.96725e-09
13	1155000	5	445000	22	4.7667e-12	6.06016e-09
12	1725000	12	1755000	125	4.79451e-12	6.09267e-09
12	485000	12	515000	199	4.82242e-12	6.12528e-09
10	945000	13	1155000	19	4.8868e-12	6.20415e-09
14	1075000	4	635000	13	4.91493e-12	6.23694e-09
4	665000	5	445000	23	5.06572e-12	6.42529e-09
8	445000	8	485000	101	5.2745e-12	6.68385e-09
14	2665000	14	2695000	107	5.4352e-12	6.88429e-09
14	1075000	5	455000	10	5.72636e-12	7.23845e-09
6	145000	6	175000	174	5.72548e-12	7.23845e-09
14	205000	14	235000	129	5.81499e-12	7.34136e-09
10	1345000	10	1375000	154	5.94807e-12	7.50589e-09
13	1165000	3	595000	10	6.0578e-12	7.63017e-09
4	125000	4	985000	20	6.06548e-12	7.6363e-09
1	555000	1	615000	44	6.15218e-12	7.73828e-09
2	425000	7	815000	21	6.25611e-12	7.86536e-09
1	465000	8	315000	17	6.35423e-12	7.98503e-09
7	1245000	7	1275000	280	6.59112e-12	8.27124e-09
11	835000	5	445000	18	6.88622e-12	8.63357e-09
11	855000	2	455000	19	7.05321e-12	8.83478e-09
5	465000	7	805000	16	7.19898e-12	9.00906e-09
3	565000	3	625000	141	7.22681e-12	9.0314e-09
4	1035000	4	1065000	142	7.37003e-12	9.19768e-09
9	255000	9	315000	142	7.47826e-12	9.32847e-09
2	25000	2	65000	45	7.48268e-12	9.3297e-09
14	1955000	14	1985000	186	7.48801e-12	9.33205e-09
1	445000	13	1175000	15	8.00434e-12	9.95726e-09
14	175000	14	205000	109	8.11958e-12	1.0096e-08
11	835000	4	655000	14	8.24786e-12	1.02414e-08
4	1165000	6	5000	15	8.26355e-12	1.02562e-08
1	455000	5	445000	15	8.65521e-12	1.07178e-08
6	805000	6	835000	152	8.6872e-12	1.07476e-08
14	1775000	14	1805000	149	8.73795e-12	1.08055e-08
7	195000	7	225000	157	8.99646e-12	1.10999e-08
1	475000	4	645000	10	9.14129e-12	1.12735e-08
13	2745000	13	2775000	97	9.28066e-12	1.1435e-08
6	455000	9	1255000	20	9.4423e-12	1.16289e-08
12	2245000	9	1465000	11	9.55952e-12	1.17679e-08
4	75000	8	1395000	11	9.6039e-12	1.18172e-08
12	1295000	8	315000	19	9.93281e-12	1.21998e-08
6	485000	7	815000	16	1.00921e-11	1.23898e-08
14	1065000	7	795000	17	1.03748e-11	1.27254e-08
9	1225000	9	1255000	130	1.05379e-11	1.29196e-08
2	455000	7	795000	19	1.07225e-11	1.3134e-08
6	485000	9	1245000	11	1.09231e-11	1.33556e-08
14	1775000	14	1815000	139	1.09318e-11	1.33603e-08
13	1155000	2	455000	16	1.09386e-11	1.33626e-08
14	2745000	14	2785000	191	1.117e-11	1.36269e-08
10	935000	9	1245000	10	1.12299e-11	1.36901e-08
11	825000	7	805000	18	1.12269e-11	1.36901e-08
11	825000	9	1255000	21	1.1633e-11	1.41599e-08
13	1735000	13	1765000	140	1.1886e-11	1.44614e-08
12	1695000	7	555000	18	1.23004e-11	1.49522e-08
4	45000	4	965000	13	1.34522e-11	1.63085e-08
13	1165000	9	1235000	10	1.34983e-11	1.63571e-08
12	2195000	12	2225000	42	1.37112e-11	1.66077e-08
4	655000	8	295000	15	1.40532e-11	1.70143e-08
3	125000	3	155000	93	1.42566e-11	1.72452e-08
8	1395000	8	1435000	55	1.47535e-11	1.78304e-08
13	1155000	14	1075000	14	1.50201e-11	1.81204e-08
11	825000	14	1065000	16	1.52491e-11	1.83802e-08
2	455000	9	1235000	15	1.53096e-11	1.84449e-08
13	1165000	2	445000	10	1.53503e-11	1.84858e-08
6	5000	6	1335000	15	1.62976e-11	1.95572e-08
1	455000	12	1275000	13	1.69257e-11	2.0293e-08
7	795000	8	275000	24	1.71343e-11	2.0534e-08
12	35000	12	2255000	12	1.73457e-11	2.07691e-08
7	545000	7	605000	67	1.79175e-11	2.14443e-08
3	605000	6	495000	17	1.79747e-11	2.15032e-08
2	455000	3	615000	14	1.91371e-11	2.28536e-08
13	425000	14	2065000	15	1.94782e-11	2.32303e-08
7	155000	7	225000	91	1.99781e-11	2.37743e-08
5	465000	8	305000	11	2.00692e-11	2.38722e-08
14	3215000	14	3245000	69	2.07342e-11	2.46416e-08
13	1175000	7	805000	17	2.09613e-11	2.49006e-08
12	2195000	9	65000	7	2.20536e-11	2.6141e-08
14	1755000	14	1785000	195	2.21042e-11	2.61895e-08
4	935000	4	1165000	38	2.21851e-11	2.62625e-08
4	635000	9	1235000	15	2.22233e-11	2.62963e-08
12	1295000	8	295000	17	2.25109e-11	2.66166e-08
12	625000	12	655000	134	2.25038e-11	2.66166e-08
14	3185000	14	3245000	37	2.25778e-11	2.66808e-08
12	1695000	12	2195000	22	2.27767e-11	2.69042e-08
11	825000	12	1265000	24	2.27913e-11	2.69098e-08
3	625000	6	455000	23	2.31147e-11	2.72797e-08
2	455000	4	635000	14	2.36198e-11	2.78637e-08
11	835000	13	1165000	9	2.39856e-11	2.82707e-08
4	25000	4	55000	44	2.40668e-11	2.83541e-08
12	755000	12	785000	111	2.41742e-11	2.84683e-08
12	2245000	6	1385000	10	2.43463e-11	2.86586e-08
14	1055000	5	445000	25	2.49142e-11	2.93143e-08
11	2035000	14	3275000	9	2.5942e-11	3.04937e-08
12	305000	12	595000	31	2.62764e-11	3.08369e-08
8	1105000	8	1155000	70	2.66403e-11	3.12235e-08
6	495000	7	815000	21	2.72949e-11	3.19632e-08
1	465000	3	595000	15	2.74864e-11	3.21735e-08
12	1285000	4	655000	14	2.83065e-11	3.30764e-08
7	85000	7	565000	28	2.95276e-11	3.44588e-08
12	1295000	2	435000	15	3.08752e-11	3.59696e-08
11	35000	7	1425000	14	3.19394e-11	3.71934e-08
3	775000	3	805000	130	3.29042e-11	3.82677e-08
3	35000	3	75000	62	3.39102e-11	3.93872e-08
5	465000	9	1245000	12	3.42307e-11	3.97423e-08
9	285000	9	315000	172	3.50647e-11	4.06411e-08
11	825000	4	655000	18	3.51243e-11	4.06928e-08
4	665000	7	815000	19	3.70016e-11	4.27583e-08
9	955000	9	985000	143	3.75571e-11	4.33634e-08
5	475000	8	315000	19	3.85057e-11	4.44208e-08
13	195000	13	235000	136	3.87282e-11	4.46585e-08
10	1465000	10	1495000	161	3.90054e-11	4.494e-08
11	1985000	11	2015000	63	4.00475e-11	4.61016e-08
2	25000	6	5000	12	4.02077e-11	4.62664e-08
14	3085000	14	3155000	111	4.05784e-11	4.66731e-08
8	445000	8	475000	69	4.09224e-11	4.69693e-08
2	455000	4	655000	14	4.24891e-11	4.87264e-08
14	3015000	14	3055000	129	4.30874e-11	4.93708e-08
3	605000	5	455000	10	4.37254e-11	5.00174e-08
14	1085000	7	805000	17	4.38964e-11	5.01919e-08
8	35000	8	1405000	18	4.6474e-11	5.30721e-08
8	435000	8	475000	68	4.70492e-11	5.36839e-08
3	595000	9	1225000	15	4.7561e-11	5.42451e-08
7	1215000	7	1245000	156	4.78825e-11	5.45888e-08
6	315000	6	345000	140	4.86427e-11	5.53625e-08
13	2865000	13	2895000	28	5.05902e-11	5.75308e-08
13	865000	13	905000	138	5.09912e-11	5.79625e-08
2	445000	5	455000	11	5.13586e-11	5.83313e-08
1	485000	2	445000	15	5.16e-11	5.85809e-08
1	465000	4	625000	16	5.16881e-11	5.86565e-08
11	835000	2	425000	16	5.20046e-11	5.89911e-08
4	55000	4	85000	61	5.30557e-11	6.01331e-08
12	85000	12	135000	92	5.51065e-11	6.24053e-08
4	935000	7	535000	15	5.74756e-11	6.49799e-08
8	465000	8	495000	109	5.82518e-11	6.583e-08
14	1075000	2	455000	12	5.83774e-11	6.5917e-08
13	1175000	7	795000	23	5.937e-11	6.701e-08
14	3165000	14	3225000	46	5.94794e-11	6.71056e-08
12	1275000	4	655000	16	6.10136e-11	6.87794e-08
3	595000	7	805000	14	6.10863e-11	6.88327e-08
14	3175000	14	3225000	55	6.1234e-11	6.89706e-08
1	115000	4	1105000	19	6.13531e-11	6.90474e-08
14	1065000	5	445000	16	6.21504e-11	6.98868e-08
11	1875000	11	1915000	100	6.23199e-11	7.00483e-08
9	255000	9	305000	117	6.58365e-11	7.39093e-08
6	485000	9	1235000	14	6.59821e-11	7.40421e-08
6	1045000	6	1075000	219	6.92762e-11	7.76103e-08
3	585000	5	445000	17	6.99389e-11	7.82881e-08
2	465000	9	1235000	17	7.04852e-11	7.88672e-08
6	5000	6	1355000	16	7.23703e-11	8.081e-08
13	2255000	13	2325000	80	7.40577e-11	8.25923e-08
3	75000	4	1175000	13	7.45306e-11	8.30174e-08
14	2375000	14	2405000	126	7.48947e-11	8.33888e-08
11	1875000	11	1905000	160	7.57096e-11	8.42615e-08
7	515000	7	605000	38	7.57152e-11	8.42615e-08
3	595000	4	645000	10	7.59054e-11	8.43757e-08
10	905000	6	515000	19	7.61129e-11	8.45408e-08
12	1275000	5	445000	21	7.6085e-11	8.45408e-08
11	855000	9	1255000	21	7.67811e-11	8.52096e-08
10	935000	5	475000	14	7.68741e-11	8.5278e-08
3	125000	3	175000	115	7.71385e-11	8.55363e-08
14	2105000	14	2135000	138	7.74384e-11	8.58338e-08
14	3005000	14	3035000	101	7.90927e-11	8.7596e-08
11	815000	5	475000	20	8.10532e-11	8.9621e-08
7	555000	7	615000	112	8.30235e-11	9.16504e-08
2	455000	6	485000	13	8.52174e-11	9.4034e-08
3	595000	4	635000	14	8.52739e-11	9.40581e-08
4	1065000	4	1095000	120	8.56078e-11	9.43881e-08
13	2085000	13	2115000	102	8.6738e-11	9.55954e-08
1	275000	1	305000	189	8.84411e-11	9.73539e-08
4	935000	4	995000	72	9.43207e-11	1.03742e-07
12	365000	12	395000	134	9.56036e-11	1.05025e-07
4	1155000	8	45000	12	9.62593e-11	1.05703e-07
8	1185000	8	1215000	252	9.6896e-11	1.06359e-07
11	1985000	5	1325000	12	9.75475e-11	1.07031e-07
5	465000	9	1235000	16	9.92139e-11	1.08728e-07
3	215000	3	255000	108	9.97215e-11	1.0924e-07
12	1295000	4	645000	11	1.00821e-10	1.10356e-07
11	1765000	14	1705000	14	1.01078e-10	1.10541e-07
14	3005000	14	3045000	96	1.01072e-10	1.10541e-07
9	195000	9	245000	100	1.01907e-10	1.11364e-07
8	1175000	8	1205000	149	1.03568e-10	1.13133e-07
6	235000	6	265000	100	1.04866e-10	1.14459e-07
5	1245000	7	1275000	25	1.05351e-10	1.14943e-07
11	1815000	11	1845000	128	1.05528e-10	1.1509e-07
14	2175000	14	2205000	83	1.07089e-10	1.16698e-07
4	975000	7	1425000	12	1.07148e-10	1.16716e-07
8	475000	8	545000	79	1.09919e-10	1.19687e-07
13	1655000	13	1685000	99	1.1305e-10	1.22899e-07
11	825000	3	615000	17	1.13444e-10	1.23277e-07
6	5000	6	1385000	13	1.13771e-10	1.23534e-07
11	25000	11	2035000	14	1.17163e-10	1.27166e-07
13	1175000	2	435000	15	1.17238e-10	1.27196e-07
14	2605000	14	2635000	114	1.17705e-10	1.27601e-07
1	485000	13	1145000	14	1.18816e-10	1.28755e-07
4	615000	6	5000	15	1.18903e-10	1.28798e-07
11	35000	11	2015000	16	1.2007e-10	1.29958e-07
13	135000	13	165000	128	1.2013e-10	1.29971e-07
11	435000	11	475000	113	1.2269e-10	1.32636e-07
6	1165000	6	1195000	161	1.23247e-10	1.33133e-07
13	2155000	13	2185000	139	1.25059e-10	1.35035e-07
6	475000	7	795000	22	1.26691e-10	1.36687e-07
13	225000	13	255000	98	1.26826e-10	1.3678e-07
12	1285000	9	1255000	15	1.27114e-10	1.37035e-07
11	1635000	11	1695000	92	1.27297e-10	1.37179e-07
4	525000	4	555000	83	1.28556e-10	1.38481e-07
3	35000	3	65000	38	1.2864e-10	1.38516e-07
1	465000	11	845000	13	1.29955e-10	1.39821e-07
14	205000	14	255000	105	1.36881e-10	1.46923e-07
1	565000	1	595000	39	1.38145e-10	1.48163e-07
11	825000	2	475000	20	1.39696e-10	1.49768e-07
10	1625000	12	1665000	15	1.39764e-10	1.49781e-07
11	1795000	11	1875000	97	1.40364e-10	1.50305e-07
12	2245000	4	85000	10	1.4308e-10	1.53153e-07
11	825000	9	1225000	18	1.52732e-10	1.63099e-07
5	1195000	5	1245000	84	1.52956e-10	1.63274e-07
4	645000	5	445000	12	1.53816e-10	1.64127e-07
2	435000	9	1255000	14	1.54451e-10	1.64741e-07
2	135000	2	165000	88	1.55872e-10	1.66191e-07
13	1195000	6	475000	17	1.56159e-10	1.66432e-07
10	935000	9	1255000	13	1.60604e-10	1.70968e-07
11	1475000	11	1505000	232	1.65147e-10	1.75594e-07
5	1015000	7	1225000	17	1.65144e-10	1.75594e-07
12	2115000	12	2145000	142	1.6543e-10	1.7576e-07
9	195000	9	235000	138	1.67798e-10	1.78206e-07
14	3285000	6	5000	8	1.69777e-10	1.80238e-07
10	935000	14	1085000	14	1.77457e-10	1.88171e-07
8	1085000	8	1125000	164	1.78891e-10	1.89617e-07
14	1735000	14	1775000	205	1.8012e-10	1.90846e-07
13	835000	13	885000	142	1.81787e-10	1.92386e-07
14	85000	14	115000	177	1.82286e-10	1.92839e-07
13	205000	13	285000	111	1.82911e-10	1.93425e-07
4	635000	6	495000	17	1.84128e-10	1.94637e-07
7	785000	7	835000	160	1.84292e-10	1.94734e-07
6	155000	6	185000	170	1.85437e-10	1.95791e-07
14	1045000	6	475000	18	1.91393e-10	2.01844e-07
12	1295000	5	445000	21	1.96405e-10	2.06809e-07
14	3175000	14	3205000	50	1.97331e-10	2.07703e-07
10	1195000	10	1235000	131	2.00324e-10	2.10772e-07
6	1245000	6	1285000	105	2.03355e-10	2.13785e-07
7	555000	7	1385000	20	2.03345e-10	2.13785e-07
11	825000	2	465000	20	2.1734e-10	2.27793e-07
7	175000	7	255000	84	2.20702e-10	2.31138e-07
4	55000	4	1145000	12	2.26399e-10	2.37013e-07
14	435000	14	465000	131	2.28242e-10	2.38851e-07
13	1175000	6	515000	19	2.2904e-10	2.39593e-07
10	955000	9	1175000	16	2.2934e-10	2.39815e-07
12	2195000	12	2245000	46	2.3243e-10	2.42953e-07
12	375000	12	405000	102	2.32855e-10	2.43303e-07
11	2035000	14	3255000	9	2.3307e-10	2.43434e-07
3	35000	7	25000	9	2.33467e-10	2.43755e-07
11	2025000	12	15000	10	2.35678e-10	2.45875e-07
1	395000	7	785000	27	2.35922e-10	2.46034e-07
4	75000	4	975000	13	2.41815e-10	2.52083e-07
13	1725000	13	1755000	93	2.46941e-10	2.57328e-07
14	1055000	2	455000	17	2.48536e-10	2.58891e-07
2	465000	7	815000	18	2.48929e-10	2.592e-07
14	2305000	14	2345000	121	2.50172e-10	2.60395e-07
5	1075000	5	1105000	94	2.51322e-10	2.61292e-07
9	345000	9	395000	83	2.56675e-10	2.66551e-07
11	2035000	7	25000	9	2.58417e-10	2.68155e-07
13	1175000	6	495000	21	2.63747e-10	2.73207e-07
1	465000	13	1185000	14	2.63688e-10	2.73207e-07
14	3165000	14	3205000	40	2.65167e-10	2.74425e-07
5	925000	5	965000	157	2.67786e-10	2.7703e-07
14	1495000	14	1525000	135	2.72846e-10	2.8205e-07
14	3015000	14	3045000	194	2.79516e-10	2.88725e-07
1	225000	1	255000	128	2.80734e-10	2.89873e-07
9	245000	9	275000	120	2.81599e-10	2.90656e-07
13	1705000	13	1735000	151	2.84177e-10	2.92982e-07
4	1145000	4	1175000	36	2.86041e-10	2.94792e-07
1	435000	1	465000	147	2.88197e-10	2.96901e-07
1	555000	4	935000	13	2.9306e-10	3.01683e-07
12	1275000	9	1235000	16	2.93483e-10	3.02003e-07
13	2585000	13	2615000	102	2.95488e-10	3.03803e-07
5	1275000	7	1045000	21	2.98801e-10	3.06895e-07
11	855000	8	295000	18	2.99113e-10	3.07099e-07
11	845000	5	445000	16	3.00376e-10	3.08162e-07
10	1065000	3	5000	6	3.00776e-10	3.08456e-07
12	1295000	6	495000	20	3.02804e-10	3.10419e-07
4	835000	4	865000	200	3.10534e-10	3.17864e-07
14	1765000	14	1805000	143	3.11085e-10	3.18307e-07
11	815000	13	1145000	16	3.1704e-10	3.24156e-07
7	1385000	7	1425000	52	3.22655e-10	3.29649e-07
14	2015000	14	2045000	129	3.2764e-10	3.34616e-07
13	205000	13	255000	123	3.2974e-10	3.36634e-07
14	1685000	14	1715000	129	3.40714e-10	3.47315e-07
12	1295000	7	795000	21	3.48523e-10	3.55142e-07
14	675000	14	705000	144	3.54104e-10	3.60619e-07
4	285000	4	315000	109	3.5403e-10	3.60619e-07
14	3105000	14	3145000	156	3.59202e-10	3.65613e-07
14	3155000	14	3245000	52	3.59607e-10	3.65888e-07
13	855000	13	885000	170	3.60887e-10	3.66915e-07
4	645000	6	485000	9	3.66022e-10	3.71857e-07
6	5000	8	25000	13	3.66356e-10	3.72057e-07
6	1035000	6	1075000	112	3.6934e-10	3.74948e-07
14	1945000	14	1985000	182	3.72403e-10	3.77916e-07
14	2815000	14	2845000	111	3.73394e-10	3.78781e-07
14	1815000	6	835000	18	3.75676e-10	3.80953e-07
3	215000	3	245000	148	3.78359e-10	3.8353e-07
9	395000	9	425000	128	3.8164e-10	3.86711e-07
10	35000	10	1645000	12	3.83574e-10	3.88526e-07
13	255000	13	295000	119	4.10215e-10	4.15047e-07
4	1175000	7	555000	14	4.1169e-10	4.16384e-07
7	35000	7	75000	23	4.16221e-10	4.2081e-07
6	635000	6	665000	226	4.17122e-10	4.21564e-07
14	3285000	2	25000	7	4.24126e-10	4.28484e-07
3	615000	6	515000	15	4.27995e-10	4.32231e-07
14	1735000	14	1815000	125	4.30579e-10	4.34517e-07
13	525000	13	555000	133	4.35052e-10	4.38705e-07
4	135000	4	165000	97	4.36406e-10	4.39907e-07
4	655000	9	1235000	14	4.38405e-10	4.41759e-07
13	1175000	9	1245000	12	4.38988e-10	4.42182e-07
9	845000	9	885000	119	4.43574e-10	4.46636e-07
4	85000	4	1165000	14	4.4689e-10	4.49808e-07
13	1165000	2	435000	8	4.48794e-10	4.51389e-07
11	1635000	11	1685000	149	4.53108e-10	4.55391e-07
11	415000	11	445000	100	4.66041e-10	4.6787e-07
13	2235000	13	2265000	130	4.75691e-10	4.77381e-07
1	615000	4	75000	9	4.93206e-10	4.94228e-07
12	1875000	13	1635000	8	5.00303e-10	5.0097e-07
11	2025000	4	1165000	13	5.01286e-10	5.01769e-07
5	445000	7	795000	24	5.03757e-10	5.04057e-07
13	305000	13	335000	165	5.05583e-10	5.05697e-07
13	95000	5	1325000	11	5.11286e-10	5.11025e-07
10	885000	5	495000	23	5.1817e-10	5.17335e-07
13	1935000	13	1975000	121	5.18396e-10	5.1737e-07
12	715000	12	755000	112	5.38979e-10	5.36783e-07
14	2105000	14	2145000	92	5.38836e-10	5.36783e-07
14	1085000	5	465000	18	5.41737e-10	5.39277e-07
2	705000	6	615000	12	5.47679e-10	5.44993e-07
4	35000	4	1175000	13	5.54148e-10	5.50825e-07
5	445000	8	285000	16	5.58179e-10	5.54629e-07
4	185000	9	135000	12	5.62563e-10	5.5878e-07
4	135000	4	175000	135	5.65496e-10	5.61488e-07
7	1155000	7	1185000	158	5.72886e-10	5.6841e-07
10	965000	10	1005000	184	5.85739e-10	5.80738e-07
12	1725000	12	1765000	74	6.00954e-10	5.95606e-07
14	3065000	14	3105000	95	6.02214e-10	5.96636e-07
11	2035000	5	1345000	8	6.03523e-10	5.97716e-07
13	1145000	3	615000	13	6.05996e-10	5.99946e-07
5	775000	5	805000	188	6.06754e-10	6.00478e-07
9	865000	9	895000	129	6.07272e-10	6.00772e-07
4	635000	5	445000	17	6.16373e-10	6.09553e-07
10	955000	5	445000	18	6.23553e-10	6.16429e-07
13	1205000	5	475000	18	6.24471e-10	6.16921e-07
4	125000	4	175000	92	6.24278e-10	6.16921e-07
14	185000	14	225000	150	6.2847e-10	6.20612e-07
11	165000	11	195000	189	6.3849e-10	6.29819e-07
14	1085000	3	585000	15	6.39855e-10	6.30937e-07
12	435000	12	465000	196	6.47266e-10	6.38013e-07
5	435000	6	475000	16	6.55291e-10	6.45689e-07
12	35000	5	1345000	10	6.58063e-10	6.48185e-07
1	435000	5	415000	20	6.60886e-10	6.5073e-07
14	3055000	14	3085000	145	6.6198e-10	6.51334e-07
1	475000	2	455000	12	6.63932e-10	6.53018e-07
14	2295000	14	2325000	97	6.68099e-10	6.56879e-07
2	425000	7	795000	22	6.69511e-10	6.58029e-07
12	1305000	9	1245000	10	6.74527e-10	6.62479e-07
12	1265000	13	1175000	21	6.76981e-10	6.64649e-07
14	1725000	14	1815000	71	6.83777e-10	6.70836e-07
6	1335000	6	1375000	35	6.98332e-10	6.84374e-07
4	485000	4	515000	201	7.00876e-10	6.86619e-07
14	3285000	2	905000	5	7.12739e-10	6.97737e-07
14	2045000	14	2075000	138	7.30156e-10	7.1453e-07
13	235000	13	265000	138	7.3562e-10	7.19619e-07
13	2045000	13	2075000	131	7.37063e-10	7.2077e-07
7	795000	9	1255000	20	7.42783e-10	7.25841e-07
1	195000	2	805000	23	7.46303e-10	7.28351e-07
14	2935000	14	3005000	74	7.66733e-10	7.47899e-07
7	815000	9	1255000	17	7.74549e-10	7.5471e-07
4	935000	4	1115000	33	7.86401e-10	7.65984e-07
4	775000	4	805000	260	7.90259e-10	7.69466e-07
10	965000	13	1215000	16	7.91707e-10	7.70599e-07
11	815000	6	495000	20	7.95122e-10	7.73646e-07
11	825000	4	645000	11	7.97296e-10	7.75483e-07
12	1295000	3	605000	14	7.99498e-10	7.77346e-07
10	985000	7	785000	22	8.12972e-10	7.90165e-07
14	2275000	14	2315000	148	8.14362e-10	7.90949e-07
12	1275000	3	595000	15	8.15246e-10	7.91525e-07
7	165000	7	205000	94	8.17125e-10	7.93066e-07
14	3175000	14	3245000	42	8.26409e-10	8.01503e-07
14	185000	14	215000	129	8.29133e-10	8.03858e-07
3	605000	4	635000	12	8.34505e-10	8.08778e-07
11	835000	4	635000	12	8.3764e-10	8.11526e-07
11	845000	6	475000	14	8.39393e-10	8.12934e-07
11	195000	11	1845000	21	8.50482e-10	8.23088e-07
1	365000	7	815000	18	8.5018e-10	8.23088e-07
2	25000	5	1335000	11	8.62777e-10	8.34689e-07
11	25000	11	2015000	13	8.77143e-10	8.47681e-07
4	935000	4	965000	76	8.86965e-10	8.56868e-07
14	295000	5	795000	10	8.94135e-10	8.63487e-07
14	1745000	14	1785000	103	8.96049e-10	8.65029e-07
7	545000	7	1425000	17	8.96369e-10	8.65029e-07
5	455000	6	475000	11	9.06166e-10	8.73863e-07
3	585000	4	635000	12	9.15394e-10	8.82449e-07
5	865000	5	905000	90	9.17048e-10	8.83416e-07
14	1725000	14	1765000	143	9.26848e-10	8.9254e-07
6	15000	6	1365000	10	9.39021e-10	9.03541e-07
14	2135000	14	2195000	147	9.4624e-10	9.09923e-07
2	145000	2	185000	133	9.73642e-10	9.34949e-07
2	435000	8	315000	13	9.85627e-10	9.45455e-07
11	1335000	11	1375000	158	9.90202e-10	9.49509e-07
2	455000	6	495000	16	9.971e-10	9.55786e-07
12	1695000	8	1455000	8	9.9837e-10	9.56665e-07
14	1745000	14	1815000	67	1.00177e-09	9.59586e-07
12	1665000	12	1725000	82	1.01282e-09	9.69829e-07
12	1655000	12	1695000	127	1.02445e-09	9.80456e-07
6	5000	7	555000	15	1.02428e-09	9.80456e-07
14	1705000	14	1735000	212	1.02709e-09	9.82456e-07
12	195000	12	225000	85	1.06534e-09	1.01832e-06
12	2195000	14	3245000	10	1.08226e-09	1.03377e-06
4	935000	4	1085000	52	1.09299e-09	1.04365e-06
6	485000	7	805000	12	1.10172e-09	1.05125e-06
5	915000	9	455000	24	1.10516e-09	1.05416e-06
13	1145000	8	305000	9	1.10588e-09	1.05447e-06
14	2995000	14	3035000	133	1.11506e-09	1.06285e-06
11	1405000	11	1445000	75	1.12076e-09	1.06791e-06
14	1065000	6	515000	13	1.12206e-09	1.06878e-06
7	95000	7	1385000	14	1.12939e-09	1.07538e-06
6	1225000	6	1265000	178	1.13644e-09	1.08172e-06
4	565000	4	615000	45	1.14616e-09	1.0902e-06
14	2375000	14	2425000	90	1.15495e-09	1.09779e-06
11	825000	3	605000	15	1.16364e-09	1.10567e-06
5	475000	6	495000	20	1.18596e-09	1.12648e-06
10	935000	5	445000	14	1.19311e-09	1.13208e-06
12	2095000	12	2135000	115	1.19639e-09	1.13481e-06
10	1055000	10	1085000	177	1.20512e-09	1.14207e-06
2	855000	7	25000	8	1.21225e-09	1.14824e-06
4	545000	4	615000	79	1.23291e-09	1.167e-06
12	555000	12	595000	147	1.23431e-09	1.16791e-06
12	785000	12	1695000	22	1.25005e-09	1.1824e-06
8	1325000	8	1365000	46	1.25187e-09	1.18329e-06
10	1635000	8	1405000	8	1.25677e-09	1.1871e-06
4	975000	4	1175000	24	1.25737e-09	1.18725e-06
4	775000	6	545000	21	1.26136e-09	1.19061e-06
11	825000	7	785000	23	1.26478e-09	1.19342e-06
13	1155000	6	475000	17	1.26902e-09	1.19701e-06
8	1255000	8	1285000	57	1.27901e-09	1.20559e-06
5	445000	8	315000	19	1.30122e-09	1.22482e-06
1	35000	4	1165000	12	1.32282e-09	1.24426e-06
2	415000	5	445000	25	1.32278e-09	1.24426e-06
9	255000	9	295000	196	1.33163e-09	1.25127e-06
13	255000	13	315000	95	1.35585e-09	1.2736e-06
12	475000	12	505000	132	1.3671e-09	1.28328e-06
14	1955000	14	1995000	98	1.37682e-09	1.2915e-06
13	1175000	5	435000	16	1.41069e-09	1.32237e-06
4	145000	4	1125000	23	1.41643e-09	1.32729e-06
11	45000	12	2245000	10	1.42137e-09	1.33146e-06
4	55000	8	25000	13	1.4285e-09	1.33767e-06
8	45000	8	435000	25	1.43173e-09	1.34024e-06
14	1995000	14	2025000	90	1.44872e-09	1.35521e-06
11	25000	11	2025000	15	1.45222e-09	1.35802e-06
1	315000	1	355000	109	1.45294e-09	1.35822e-06
10	925000	12	1285000	12	1.45348e-09	1.35826e-06
10	945000	12	1295000	17	1.45561e-09	1.35978e-06
14	2635000	14	2675000	124	1.46145e-09	1.3643e-06
9	1085000	9	1115000	123	1.47206e-09	1.37373e-06
11	1945000	14	3145000	11	1.48782e-09	1.38796e-06
4	975000	4	1135000	23	1.50189e-09	1.40012e-06
4	565000	4	605000	33	1.51496e-09	1.41134e-06
12	1275000	13	1135000	14	1.5162e-09	1.412e-06
10	35000	10	65000	80	1.51852e-09	1.41368e-06
12	1295000	6	485000	14	1.51944e-09	1.41406e-06
9	485000	9	515000	119	1.52283e-09	1.41673e-06
14	1085000	3	595000	16	1.52523e-09	1.41847e-06
13	745000	13	775000	114	1.52603e-09	1.41873e-06
11	35000	6	25000	9	1.53545e-09	1.42676e-06
14	2735000	14	2775000	112	1.54195e-09	1.43206e-06
14	1085000	3	565000	19	1.56022e-09	1.44854e-06
10	215000	9	1485000	10	1.57567e-09	1.46238e-06
14	2285000	14	2325000	149	1.58666e-09	1.47207e-06
12	2025000	12	2055000	117	1.59373e-09	1.47762e-06
14	1745000	8	1145000	14	1.59479e-09	1.4781e-06
6	1265000	6	1295000	109	1.60162e-09	1.48342e-06
3	585000	6	495000	15	1.6087e-09	1.48947e-06
1	455000	9	1245000	8	1.62337e-09	1.50202e-06
12	335000	12	495000	57	1.6265e-09	1.50441e-06
11	25000	8	1445000	9	1.63927e-09	1.51571e-06
13	2255000	13	2305000	148	1.66322e-09	1.53733e-06
1	435000	8	315000	18	1.69301e-09	1.56433e-06
12	535000	12	565000	102	1.69663e-09	1.56714e-06
5	195000	5	235000	185	1.70635e-09	1.57558e-06
10	1625000	4	1175000	10	1.71942e-09	1.58711e-06
10	1645000	4	45000	8	1.72293e-09	1.58981e-06
2	515000	2	555000	114	1.7324e-09	1.59746e-06
4	145000	4	1085000	26	1.73615e-09	1.60038e-06
5	915000	5	965000	155	1.73958e-09	1.60299e-06
2	745000	8	545000	16	1.75907e-09	1.6204e-06
14	1685000	14	1765000	121	1.76023e-09	1.62093e-06
12	1305000	13	1155000	14	1.76599e-09	1.62568e-06
11	1465000	11	1505000	111	1.76674e-09	1.62582e-06
10	925000	13	1165000	8	1.77753e-09	1.63519e-06
11	895000	6	565000	21	1.77797e-09	1.63519e-06
5	855000	5	915000	142	1.77811e-09	1.63519e-06
13	1175000	2	465000	18	1.78256e-09	1.63815e-06
11	825000	8	315000	18	1.80681e-09	1.65931e-06
1	485000	10	905000	15	1.80681e-09	1.65931e-06
3	475000	3	515000	141	1.81055e-09	1.66163e-06
2	455000	9	1255000	14	1.83947e-09	1.68703e-06
4	985000	4	1015000	108	1.85753e-09	1.70244e-06
4	1165000	8	35000	13	1.86088e-09	1.70494e-06
7	555000	8	35000	15	1.86605e-09	1.7091e-06
12	1665000	7	595000	14	1.87676e-09	1.71778e-06
1	195000	1	225000	205	1.8918e-09	1.72977e-06
12	2245000	4	1165000	12	1.89616e-09	1.73317e-06
11	1485000	11	1525000	102	1.90939e-09	1.74467e-06
3	645000	5	1345000	9	1.92709e-09	1.76025e-06
4	55000	4	105000	77	1.93233e-09	1.76444e-06
6	795000	6	825000	169	1.96702e-09	1.79491e-06
12	425000	12	455000	117	1.98017e-09	1.80631e-06
2	475000	6	425000	17	1.99217e-09	1.81603e-06
7	785000	9	1255000	20	2.02823e-09	1.84829e-06
10	865000	12	1355000	15	2.03254e-09	1.85159e-06
11	25000	11	1985000	15	2.04596e-09	1.8632e-06
12	1295000	9	1245000	11	2.07344e-09	1.88759e-06
13	2395000	13	2425000	139	2.08088e-09	1.89309e-06
12	1265000	2	455000	16	2.11452e-09	1.92112e-06
6	5000	6	1365000	16	2.12254e-09	1.92776e-06
10	285000	10	315000	77	2.13795e-09	1.94111e-06
9	895000	9	925000	149	2.15599e-09	1.95683e-06
11	855000	3	575000	21	2.15872e-09	1.95865e-06
11	145000	11	175000	103	2.16326e-09	1.96212e-06
1	575000	1	615000	32	2.16957e-09	1.96719e-06
12	1275000	8	315000	16	2.1738e-09	1.97036e-06
3	65000	6	5000	9	2.19729e-09	1.99098e-06
11	835000	8	315000	13	2.2331e-09	2.02276e-06
11	205000	14	455000	14	2.24661e-09	2.03432e-06
14	1055000	8	325000	20	2.24806e-09	2.03496e-06
4	145000	4	175000	171	2.25939e-09	2.04384e-06
8	45000	8	1445000	14	2.28603e-09	2.06657e-06
12	2245000	6	1365000	11	2.29317e-09	2.07164e-06
7	35000	7	1425000	11	2.31022e-09	2.08566e-06
11	855000	11	885000	248	2.3131e-09	2.08756e-06
14	1075000	5	445000	14	2.35743e-09	2.12616e-06
12	1855000	12	1905000	111	2.35903e-09	2.1269e-06
11	835000	13	1155000	13	2.36421e-09	2.13086e-06
4	55000	4	935000	21	2.41328e-09	2.17437e-06
12	95000	12	155000	71	2.41652e-09	2.17656e-06
10	955000	7	815000	15	2.45369e-09	2.20784e-06
5	435000	6	515000	15	2.47399e-09	2.2239e-06
2	45000	7	555000	9	2.52164e-09	2.26448e-06
7	1115000	7	1155000	148	2.53251e-09	2.2735e-06
10	15000	9	135000	6	2.57619e-09	2.31041e-06
3	45000	3	75000	58	2.62442e-09	2.35134e-06
8	1075000	8	1105000	86	2.64426e-09	2.36677e-06
2	445000	9	1255000	15	2.65971e-09	2.37903e-06
4	555000	4	935000	20	2.66421e-09	2.38228e-06
4	965000	4	1165000	25	2.67013e-09	2.38678e-06
10	575000	10	605000	180	2.67911e-09	2.39402e-06
7	525000	7	565000	34	2.70215e-09	2.41382e-06
12	715000	12	745000	171	2.70806e-09	2.4183e-06
3	625000	6	475000	20	2.71112e-09	2.42023e-06
1	445000	7	815000	12	2.74333e-09	2.44819e-06
14	3215000	14	3255000	41	2.79698e-09	2.49442e-06
12	1275000	4	635000	14	2.82049e-09	2.51374e-06
13	1145000	5	1285000	14	2.85089e-09	2.53917e-06
14	2515000	14	2545000	76	2.85156e-09	2.53917e-06
11	1405000	11	1435000	84	2.86633e-09	2.55125e-06
14	2955000	14	2985000	66	2.88589e-09	2.56698e-06
14	2975000	8	1265000	13	2.91936e-09	2.59504e-06
13	555000	13	585000	105	2.9332e-09	2.60649e-06
10	925000	2	465000	14	2.99133e-09	2.65641e-06
11	495000	11	535000	106	3.01211e-09	2.67399e-06
13	2645000	13	2735000	83	3.02096e-09	2.68096e-06
3	135000	6	385000	12	3.05652e-09	2.70987e-06
2	465000	5	465000	16	3.07226e-09	2.72293e-06
10	535000	10	565000	180	3.0808e-09	2.72961e-06
14	2605000	14	2705000	46	3.08571e-09	2.73231e-06
5	105000	8	25000	12	3.08484e-09	2.73231e-06
7	525000	7	595000	22	3.16047e-09	2.79564e-06
1	555000	1	595000	35	3.17031e-09	2.80343e-06
8	875000	8	935000	148	3.18522e-09	2.8157e-06
1	425000	1	465000	99	3.2323e-09	2.85546e-06
5	165000	5	195000	173	3.23774e-09	2.85933e-06
5	865000	5	935000	76	3.24372e-09	2.86368e-06
1	485000	2	375000	17	3.24478e-09	2.86369e-06
3	595000	6	485000	12	3.25677e-09	2.87333e-06
11	2025000	12	55000	13	3.26577e-09	2.88034e-06
7	565000	7	1405000	11	3.26685e-09	2.88035e-06
7	175000	7	225000	107	3.26907e-09	2.88138e-06
14	3025000	14	3095000	68	3.3029e-09	2.91026e-06
14	2375000	14	2575000	33	3.33171e-09	2.93469e-06
14	3205000	14	3235000	40	3.34131e-09	2.94219e-06
11	1975000	11	2035000	34	3.36963e-09	2.9652e-06
14	3165000	14	3215000	48	3.42915e-09	3.01562e-06
13	1175000	8	305000	10	3.46571e-09	3.04679e-06
5	895000	5	925000	176	3.49259e-09	3.06943e-06
4	745000	4	775000	172	3.6134e-09	3.17252e-06
2	85000	7	1385000	11	3.65709e-09	3.20777e-06
9	475000	9	505000	123	3.68564e-09	3.23177e-06
1	445000	10	935000	9	3.72605e-09	3.26614e-06
14	1895000	9	415000	12	3.73043e-09	3.26893e-06
11	845000	12	1285000	11	3.73637e-09	3.27308e-06
4	1165000	6	1355000	11	3.74402e-09	3.27826e-06
7	145000	7	185000	139	3.7881e-09	3.31519e-06
11	2025000	7	555000	14	3.80267e-09	3.32686e-06
14	1085000	9	1225000	16	3.81746e-09	3.33829e-06
8	315000	8	345000	169	3.82314e-09	3.34154e-06
14	3185000	14	3225000	42	3.8436e-09	3.35834e-06
12	1275000	12	1305000	110	3.8532e-09	3.36565e-06
10	905000	12	1285000	14	3.87715e-09	3.38548e-06
7	1235000	9	505000	9	3.89533e-09	3.39917e-06
13	1155000	3	595000	14	3.91134e-09	3.41094e-06
4	55000	4	145000	61	3.91757e-09	3.41529e-06
4	555000	4	605000	33	3.94257e-09	3.43487e-06
12	1265000	6	505000	14	3.99217e-09	3.47475e-06
3	595000	6	495000	16	3.99284e-09	3.47475e-06
14	2365000	14	2425000	111	4.03416e-09	3.50828e-06
5	475000	7	785000	21	4.03329e-09	3.50828e-06
6	485000	8	315000	13	4.04718e-09	3.51811e-06
1	195000	1	315000	97	4.07943e-09	3.54275e-06
13	1175000	14	1065000	13	4.12402e-09	3.58032e-06
4	265000	4	1175000	20	4.12562e-09	3.58057e-06
4	975000	7	585000	10	4.12641e-09	3.58057e-06
13	45000	2	835000	9	4.14376e-09	3.59401e-06
14	1075000	3	585000	10	4.15311e-09	3.60097e-06
14	3225000	5	1345000	8	4.20616e-09	3.64348e-06
4	295000	4	325000	159	4.24436e-09	3.67306e-06
11	825000	11	855000	232	4.24925e-09	3.67611e-06
12	505000	12	535000	122	4.26508e-09	3.68864e-06
10	1645000	4	55000	10	4.28651e-09	3.70363e-06
12	335000	12	475000	61	4.31572e-09	3.7265e-06
11	1655000	11	1695000	136	4.37336e-09	3.77507e-06
14	2365000	14	2395000	126	4.57773e-09	3.94897e-06
7	535000	8	35000	12	4.59839e-09	3.96553e-06
3	605000	9	1235000	12	4.61458e-09	3.9757e-06
12	335000	12	505000	48	4.6604e-09	4.01391e-06
3	625000	7	815000	19	4.76477e-09	4.10001e-06
4	35000	4	1165000	14	4.86263e-09	4.1788e-06
1	455000	8	305000	7	4.89097e-09	4.20183e-06
4	55000	4	95000	36	4.90077e-09	4.20892e-06
12	1025000	12	1055000	178	4.90293e-09	4.20945e-06
5	1175000	5	1205000	85	4.93032e-09	4.23088e-06
6	445000	7	825000	10	4.92946e-09	4.23088e-06
6	775000	6	815000	95	4.96394e-09	4.25644e-06
11	835000	14	1085000	14	5.01722e-09	4.29941e-06
5	205000	5	235000	223	5.15574e-09	4.40977e-06
4	385000	4	415000	226	5.17672e-09	4.42632e-06
1	595000	7	595000	8	5.20672e-09	4.45056e-06
2	55000	8	455000	8	5.31516e-09	4.53754e-06
13	2495000	13	2545000	92	5.35277e-09	4.56678e-06
5	445000	7	825000	14	5.3691e-09	4.57928e-06
11	2015000	4	85000	8	5.39668e-09	4.60135e-06
12	2195000	12	2255000	19	5.41952e-09	4.61793e-06
8	1325000	9	735000	10	5.43638e-09	4.63084e-06
10	945000	5	455000	10	5.47882e-09	4.66552e-06
3	835000	9	1475000	8	5.50233e-09	4.68408e-06
14	3275000	9	65000	5	5.53674e-09	4.7119e-06
11	1205000	11	1235000	139	5.559e-09	4.72787e-06
13	1855000	13	1895000	93	5.56343e-09	4.73016e-06
2	435000	6	475000	13	5.59008e-09	4.74984e-06
14	1115000	2	465000	16	5.60917e-09	4.76458e-06
8	125000	8	1105000	19	5.62388e-09	4.77558e-06
12	965000	6	115000	13	5.63224e-09	4.78118e-06
7	1105000	7	1135000	161	5.75153e-09	4.87939e-06
10	1465000	9	795000	17	5.76766e-09	4.89155e-06
12	1295000	9	1265000	13	5.79351e-09	4.91194e-06
13	535000	13	565000	150	5.92517e-09	5.02099e-06
6	985000	6	1035000	92	5.92398e-09	5.02099e-06
10	925000	5	465000	13	5.92773e-09	5.02103e-06
14	3215000	9	65000	6	5.92846e-09	5.02103e-06
9	115000	9	145000	95	5.92915e-09	5.02103e-06
1	615000	9	25000	9	5.96294e-09	5.04456e-06
14	465000	14	495000	162	5.96655e-09	5.04604e-06
12	295000	12	355000	82	6.00456e-09	5.07661e-06
2	35000	2	865000	10	6.0291e-09	5.09577e-06
3	605000	9	1375000	10	6.12917e-09	5.17552e-06
12	105000	12	135000	129	6.19609e-09	5.22878e-06
7	35000	7	555000	17	6.28382e-09	5.29622e-06
8	85000	8	115000	161	6.34891e-09	5.34942e-06
2	675000	2	705000	163	6.42384e-09	5.4092e-06
11	835000	7	795000	15	6.468e-09	5.44301e-06
4	55000	4	985000	17	6.49303e-09	5.46069e-06
4	45000	4	1175000	11	6.57936e-09	5.52987e-06
1	435000	11	855000	21	6.61417e-09	5.55569e-06
8	295000	9	1255000	14	6.68297e-09	5.60828e-06
12	1695000	12	1735000	53	6.68628e-09	5.60932e-06
10	1425000	10	1465000	122	6.68906e-09	5.60992e-06
13	1935000	5	775000	16	6.69897e-09	5.61649e-06
11	2025000	2	895000	8	6.7521e-09	5.65754e-06
14	685000	14	715000	204	6.82741e-09	5.71712e-06
12	1295000	14	1075000	12	6.84229e-09	5.72782e-06
4	695000	5	425000	17	6.8593e-09	5.73993e-06
14	1085000	4	645000	10	6.89484e-09	5.76292e-06
11	165000	11	205000	155	6.90007e-09	5.76551e-06
14	3165000	14	3235000	34	6.93274e-09	5.79104e-06
13	2495000	13	2735000	39	6.96355e-09	5.81498e-06
10	1315000	2	355000	10	7.00923e-09	5.84953e-06
11	1985000	12	1635000	12	7.10802e-09	5.92651e-06
3	225000	3	255000	118	7.19031e-09	5.99328e-06
7	555000	7	625000	85	7.26834e-09	6.0546e-06
11	815000	3	575000	18	7.28681e-09	6.06659e-06
1	615000	6	1365000	10	7.28496e-09	6.06659e-06
2	45000	2	75000	24	7.35454e-09	6.11891e-06
14	2125000	14	2165000	97	7.36429e-09	6.12514e-06
5	445000	5	475000	208	7.41685e-09	6.16623e-06
7	1115000	7	1165000	143	7.41874e-09	6.16623e-06
7	445000	7	475000	122	7.41596e-09	6.16623e-06
12	1275000	14	1065000	12	7.44119e-09	6.18153e-06
13	345000	13	385000	163	7.46246e-09	6.1973e-06
12	1425000	12	1465000	123	7.47263e-09	6.20385e-06
9	645000	9	675000	88	7.52662e-09	6.24295e-06
4	1165000	5	1325000	11	7.53129e-09	6.24492e-06
2	875000	7	555000	12	7.54787e-09	6.25547e-06
4	105000	4	135000	119	7.54633e-09	6.25547e-06
5	425000	6	475000	18	7.60013e-09	6.29431e-06
1	595000	4	1165000	9	7.63244e-09	6.31914e-06
11	435000	11	465000	160	7.64889e-09	6.33083e-06
2	455000	3	605000	11	7.66497e-09	6.3422e-06
10	955000	4	615000	14	7.6997e-09	6.369e-06
12	1875000	12	1905000	101	7.77106e-09	6.42411e-06
11	835000	7	805000	11	7.78137e-09	6.43068e-06
4	555000	7	555000	11	7.86037e-09	6.49202e-06
9	245000	9	315000	82	7.93499e-09	6.54966e-06
10	945000	14	1065000	12	7.9762e-09	6.57968e-06
3	785000	3	815000	166	7.98901e-09	6.58824e-06
14	1075000	6	495000	13	7.99161e-09	6.58838e-06
12	515000	12	545000	169	7.99433e-09	6.58862e-06
14	1055000	8	295000	16	8.09235e-09	6.66739e-06
5	495000	6	435000	20	8.11059e-09	6.68039e-06
4	1005000	7	555000	21	8.13192e-09	6.69593e-06
8	1435000	9	465000	11	8.22796e-09	6.76971e-06
5	1255000	5	1285000	106	8.25584e-09	6.78768e-06
6	5000	7	575000	9	8.32751e-09	6.84245e-06
14	915000	14	945000	178	8.33127e-09	6.84347e-06
2	305000	2	345000	137	8.34093e-09	6.84934e-06
2	435000	2	465000	95	8.37821e-09	6.87787e-06
3	565000	9	1225000	15	8.38146e-09	6.87846e-06
7	45000	7	555000	16	8.42355e-09	6.90882e-06
14	3155000	14	3215000	67	8.44457e-09	6.92397e-06
13	445000	13	485000	154	8.46346e-09	6.93737e-06
14	3245000	14	3285000	23	8.48114e-09	6.94976e-06
12	1295000	5	455000	10	8.4957e-09	6.95597e-06
14	3035000	14	3095000	105	8.49128e-09	6.95597e-06
1	475000	4	665000	13	8.49197e-09	6.95597e-06
11	1975000	11	2005000	51	8.55693e-09	7.00317e-06
13	1485000	13	2565000	19	8.55663e-09	7.00317e-06
11	855000	3	625000	22	8.65848e-09	7.08226e-06
11	2005000	2	865000	9	8.68607e-09	7.10269e-06
12	1645000	12	1675000	136	8.69646e-09	7.10904e-06
5	855000	5	885000	142	8.73298e-09	7.13675e-06
14	1055000	14	1085000	213	8.75085e-09	7.1492e-06
13	1735000	13	1775000	168	8.793e-09	7.17931e-06
12	905000	4	1085000	11	8.81576e-09	7.19574e-06
14	2455000	14	2485000	93	8.82227e-09	7.19888e-06
5	905000	6	105000	12	8.8381e-09	7.20963e-06
2	35000	4	1135000	7	9.00126e-09	7.34053e-06
7	535000	8	465000	14	9.02374e-09	7.35665e-06
3	665000	9	1215000	16	9.05124e-09	7.37685e-06
10	1605000	3	65000	7	9.07964e-09	7.39778e-06
4	55000	4	125000	53	9.11651e-09	7.42337e-06
13	2645000	13	2775000	49	9.13387e-09	7.43304e-06
3	565000	7	835000	17	9.21838e-09	7.49957e-06
11	1345000	11	1425000	50	9.25783e-09	7.5249e-06
10	35000	6	5000	10	9.29038e-09	7.5491e-06
2	475000	3	595000	14	9.31658e-09	7.56812e-06
10	1495000	10	1555000	73	9.45735e-09	7.67788e-06
1	135000	1	165000	104	9.4664e-09	7.68293e-06
7	825000	9	1225000	11	9.47495e-09	7.68758e-06
7	555000	8	1415000	11	9.57329e-09	7.76505e-06
13	215000	13	305000	84	9.62932e-09	7.80816e-06
12	2245000	8	35000	11	9.65947e-09	7.83027e-06
4	975000	7	555000	13	9.67455e-09	7.84016e-06
10	1465000	11	125000	13	9.72919e-09	7.88208e-06
10	155000	2	935000	6	9.76974e-09	7.91257e-06
3	1005000	4	1075000	5	9.84489e-09	7.96869e-06
2	45000	8	45000	8	9.90209e-09	8.01259e-06
3	1025000	4	75000	5	9.90962e-09	8.01629e-06
5	185000	5	235000	137	9.96104e-09	8.05549e-06
11	885000	14	1135000	20	9.96884e-09	8.0594e-06
14	3145000	14	3175000	91	1.0009e-08	8.08943e-06
3	1025000	8	35000	6	1.00296e-08	8.10368e-06
14	2355000	14	2405000	104	1.00925e-08	8.15211e-06
13	585000	13	665000	50	1.01474e-08	8.19399e-06
10	325000	9	1115000	16	1.01552e-08	8.1971e-06
13	1135000	13	1165000	35	1.01543e-08	8.1971e-06
3	535000	3	565000	113	1.01652e-08	8.20103e-06
11	825000	8	285000	14	1.01753e-08	8.20674e-06
2	65000	4	55000	10	1.01757e-08	8.20674e-06
14	3165000	14	3245000	34	1.02155e-08	8.23428e-06
10	295000	11	1625000	15	1.02402e-08	8.25176e-06
3	625000	8	275000	20	1.04312e-08	8.40322e-06
11	1455000	11	1725000	31	1.04405e-08	8.40817e-06
11	815000	9	1235000	15	1.04433e-08	8.40817e-06
2	295000	2	325000	169	1.05211e-08	8.46557e-06
13	505000	13	605000	73	1.06261e-08	8.54501e-06
11	825000	8	275000	19	1.06299e-08	8.5455e-06
14	1065000	9	1235000	11	1.06767e-08	8.57808e-06
11	825000	3	585000	14	1.06817e-08	8.57949e-06
11	1045000	14	575000	10	1.07033e-08	8.59437e-06
4	1165000	7	535000	12	1.08095e-08	8.6745e-06
5	935000	9	255000	18	1.08876e-08	8.73453e-06
11	1875000	11	1985000	50	1.09062e-08	8.74691e-06
1	445000	5	465000	11	1.09079e-08	8.74691e-06
7	775000	7	805000	121	1.09197e-08	8.74998e-06
14	1945000	14	1975000	116	1.09254e-08	8.75201e-06
9	185000	9	315000	49	1.09546e-08	8.77017e-06
10	1485000	10	1515000	50	1.09969e-08	8.80147e-06
11	45000	11	2015000	11	1.10418e-08	8.83221e-06
10	485000	10	515000	103	1.10588e-08	8.84319e-06
1	465000	3	615000	12	1.11049e-08	8.87745e-06
12	1275000	5	425000	17	1.11286e-08	8.89375e-06
3	115000	3	145000	142	1.12027e-08	8.94773e-06
5	1345000	6	25000	6	1.1393e-08	9.09702e-06
10	215000	10	255000	115	1.1731e-08	9.36418e-06
12	905000	12	1845000	15	1.20309e-08	9.59792e-06
8	1215000	8	1245000	134	1.20341e-08	9.59792e-06
10	75000	14	2125000	12	1.21008e-08	9.64798e-06
12	285000	12	345000	100	1.22087e-08	9.73118e-06
14	1065000	2	445000	11	1.22111e-08	9.73118e-06
10	1205000	10	1235000	140	1.2233e-08	9.74484e-06
11	1955000	11	1995000	96	1.23124e-08	9.80524e-06
11	815000	12	1305000	14	1.23596e-08	9.83988e-06
11	45000	8	1415000	8	1.24902e-08	9.94096e-06
7	245000	7	275000	185	1.25163e-08	9.95882e-06
10	135000	13	1915000	13	1.26414e-08	1.00555e-05
10	1625000	10	1655000	23	1.26419e-08	1.00555e-05
2	455000	8	305000	8	1.26669e-08	1.00698e-05
14	3045000	14	3095000	134	1.27057e-08	1.00977e-05
7	795000	8	315000	18	1.28579e-08	1.02127e-05
12	1285000	9	1235000	12	1.30166e-08	1.03327e-05
9	1065000	9	1095000	124	1.30311e-08	1.03411e-05
7	255000	7	285000	84	1.31809e-08	1.04569e-05
3	465000	3	495000	155	1.32061e-08	1.04739e-05
7	15000	7	45000	15	1.34005e-08	1.06157e-05
14	2265000	14	2295000	101	1.34592e-08	1.06591e-05
6	115000	6	1265000	26	1.34617e-08	1.06591e-05
13	1705000	13	1755000	72	1.35234e-08	1.07021e-05
5	425000	8	425000	15	1.35214e-08	1.07021e-05
12	55000	12	2195000	15	1.35593e-08	1.07259e-05
2	25000	2	855000	11	1.36153e-08	1.0767e-05
12	255000	12	295000	106	1.3628e-08	1.07731e-05
9	995000	9	1025000	150	1.36582e-08	1.07915e-05
7	115000	7	145000	143	1.36636e-08	1.07927e-05
9	145000	9	175000	104	1.37027e-08	1.08204e-05
8	1045000	8	1075000	64	1.37298e-08	1.08386e-05
12	345000	12	405000	77	1.38279e-08	1.09097e-05
11	255000	11	285000	122	1.39343e-08	1.09873e-05
11	815000	7	785000	20	1.39474e-08	1.09944e-05
1	35000	4	55000	11	1.39995e-08	1.10291e-05
13	1175000	9	1225000	15	1.41982e-08	1.11791e-05
5	455000	9	1235000	9	1.42247e-08	1.11935e-05
10	955000	12	1275000	14	1.43303e-08	1.12733e-05
12	295000	12	385000	68	1.45635e-08	1.14535e-05
7	555000	9	75000	10	1.45913e-08	1.1472e-05
11	825000	14	1085000	19	1.47336e-08	1.15785e-05
14	1695000	14	1725000	87	1.4731e-08	1.15785e-05
11	445000	11	505000	95	1.47696e-08	1.16021e-05
12	1265000	14	1075000	13	1.48943e-08	1.16934e-05
10	945000	8	305000	9	1.49752e-08	1.17534e-05
14	2895000	14	2985000	53	1.50111e-08	1.17782e-05
13	2525000	13	2555000	130	1.50547e-08	1.1809e-05
7	45000	8	35000	8	1.50632e-08	1.18122e-05
5	445000	9	1255000	18	1.52449e-08	1.19513e-05
6	1135000	6	1195000	134	1.53582e-08	1.20366e-05
14	2535000	14	2565000	101	1.5415e-08	1.20776e-05
11	55000	6	5000	7	1.54419e-08	1.20953e-05
13	2575000	13	2605000	184	1.54566e-08	1.21009e-05
4	645000	7	805000	8	1.54535e-08	1.21009e-05
12	745000	12	775000	95	1.57797e-08	1.23385e-05
12	1935000	12	1965000	104	1.57892e-08	1.23423e-05
1	465000	9	1215000	13	1.58287e-08	1.23697e-05
2	465000	8	335000	18	1.62522e-08	1.2686e-05
7	405000	7	455000	53	1.62701e-08	1.26963e-05
14	2275000	14	2785000	45	1.63213e-08	1.27327e-05
14	2805000	9	425000	14	1.63441e-08	1.27467e-05
12	1275000	9	1245000	10	1.63737e-08	1.27662e-05
12	95000	9	25000	10	1.63791e-08	1.27667e-05
8	1215000	8	1285000	91	1.64092e-08	1.27865e-05
13	255000	13	285000	168	1.65017e-08	1.28549e-05
1	65000	7	545000	6	1.65808e-08	1.29128e-05
11	835000	5	465000	12	1.65857e-08	1.2913e-05
13	2835000	5	85000	12	1.66978e-08	1.29965e-05
9	215000	9	295000	87	1.67663e-08	1.30461e-05
2	895000	2	925000	17	1.67921e-08	1.30624e-05
2	485000	7	785000	20	1.68576e-08	1.31096e-05
3	575000	7	795000	20	1.70178e-08	1.32266e-05
13	1865000	13	1945000	106	1.71386e-08	1.33129e-05
1	35000	4	25000	7	1.71416e-08	1.33129e-05
12	1725000	4	1135000	9	1.71783e-08	1.33361e-05
12	1285000	7	825000	10	1.73001e-08	1.34268e-05
4	125000	4	1175000	14	1.73023e-08	1.34268e-05
5	465000	8	285000	12	1.73294e-08	1.34419e-05
14	1065000	9	1245000	8	1.73658e-08	1.34663e-05
8	1115000	8	1155000	113	1.7446e-08	1.35246e-05
12	355000	12	395000	119	1.75477e-08	1.35996e-05
6	515000	9	1185000	13	1.77039e-08	1.37167e-05
1	475000	5	465000	12	1.77251e-08	1.37292e-05
13	1145000	5	465000	13	1.78794e-08	1.38448e-05
12	2245000	8	1435000	9	1.80483e-08	1.39716e-05
14	225000	14	255000	206	1.80598e-08	1.39725e-05
10	1645000	9	1505000	7	1.80894e-08	1.39914e-05
8	25000	8	1435000	13	1.81208e-08	1.40117e-05
13	1145000	3	585000	11	1.81565e-08	1.40353e-05
13	505000	13	535000	188	1.81667e-08	1.40392e-05
12	1925000	12	1955000	78	1.82671e-08	1.41128e-05
12	65000	12	2255000	7	1.82806e-08	1.41192e-05
4	675000	8	285000	12	1.84458e-08	1.42386e-05
14	2935000	14	3045000	77	1.86788e-08	1.44062e-05
4	225000	4	255000	285	1.86971e-08	1.44163e-05
14	2935000	14	2965000	108	1.87778e-08	1.44703e-05
14	1255000	8	585000	15	1.88591e-08	1.45288e-05
10	975000	4	635000	14	1.89216e-08	1.45728e-05
11	845000	3	605000	10	1.89533e-08	1.45931e-05
13	1705000	13	1745000	137	1.89762e-08	1.46066e-05
9	455000	9	485000	148	1.90138e-08	1.46314e-05
1	465000	11	855000	16	1.92156e-08	1.47783e-05
14	3185000	14	3215000	48	1.92487e-08	1.47993e-05
6	305000	9	155000	15	1.92483e-08	1.47993e-05
13	1205000	4	695000	15	1.9332e-08	1.48552e-05
12	2245000	4	55000	11	1.94329e-08	1.49285e-05
13	2385000	13	2415000	104	1.94564e-08	1.49423e-05
13	1135000	9	1315000	12	1.94645e-08	1.49443e-05
10	1495000	9	155000	15	1.96658e-08	1.50861e-05
3	35000	3	1045000	8	1.99247e-08	1.52804e-05
5	1265000	7	1205000	22	1.99291e-08	1.52804e-05
13	1015000	14	2975000	12	2.0053e-08	1.53657e-05
14	925000	5	745000	16	2.02251e-08	1.54845e-05
14	2855000	14	3035000	34	2.02595e-08	1.55065e-05
13	1935000	13	1985000	118	2.02679e-08	1.55086e-05
9	245000	9	455000	55	2.02694e-08	1.55086e-05
1	455000	7	805000	9	2.034e-08	1.5555e-05
4	935000	4	1175000	26	2.0493e-08	1.56587e-05
13	2725000	13	2775000	45	2.07366e-08	1.5836e-05
13	1145000	6	495000	15	2.07966e-08	1.58773e-05
5	1235000	7	1055000	15	2.08766e-08	1.59339e-05
14	2735000	14	2765000	90	2.10747e-08	1.60806e-05
4	55000	4	1185000	10	2.10784e-08	1.60806e-05
6	125000	6	165000	79	2.113e-08	1.61137e-05
14	3255000	14	3285000	20	2.1164e-08	1.61352e-05
11	835000	5	455000	8	2.1171e-08	1.61359e-05
14	1065000	6	475000	12	2.11824e-08	1.61401e-05
6	865000	7	325000	15	2.12247e-08	1.61678e-05
12	335000	12	375000	101	2.12307e-08	1.61678e-05
10	865000	10	895000	103	2.12711e-08	1.6194e-05
13	1165000	9	1245000	6	2.1274e-08	1.6194e-05
10	175000	10	1385000	22	2.13655e-08	1.62477e-05
14	1055000	2	465000	18	2.14588e-08	1.63141e-05
13	205000	13	455000	41	2.15365e-08	1.63686e-05
1	555000	6	1355000	9	2.15976e-08	1.64104e-05
5	435000	6	445000	11	2.16451e-08	1.64419e-05
3	145000	3	175000	156	2.16858e-08	1.64682e-05
13	2545000	13	2585000	96	2.16936e-08	1.64695e-05
2	455000	5	445000	15	2.18733e-08	1.66013e-05
12	1995000	12	2075000	41	2.18887e-08	1.66084e-05
11	2025000	5	1335000	11	2.20432e-08	1.67162e-05
12	55000	6	1365000	12	2.20757e-08	1.67362e-05
12	1285000	7	795000	15	2.21836e-08	1.68133e-05
1	475000	3	595000	11	2.22947e-08	1.68928e-05
12	325000	12	395000	77	2.23636e-08	1.69403e-05
5	875000	5	935000	59	2.253e-08	1.70568e-05
4	1135000	7	555000	11	2.27287e-08	1.72025e-05
13	2685000	13	2775000	47	2.30071e-08	1.74051e-05
9	195000	9	255000	117	2.30029e-08	1.74051e-05
6	415000	7	785000	19	2.30537e-08	1.74339e-05
7	1115000	7	1265000	49	2.30801e-08	1.7449e-05
2	125000	2	155000	82	2.30969e-08	1.74568e-05
2	455000	2	525000	58	2.31163e-08	1.74664e-05
3	595000	5	465000	13	2.3116e-08	1.74664e-05
5	785000	8	975000	12	2.31395e-08	1.74744e-05
1	475000	8	295000	11	2.32332e-08	1.75403e-05
1	535000	4	35000	11	2.33141e-08	1.75919e-05
3	605000	9	1285000	13	2.33853e-08	1.76356e-05
5	1245000	7	1015000	15	2.3771e-08	1.79114e-05
12	55000	12	2245000	16	2.39389e-08	1.80279e-05
7	755000	7	785000	210	2.43849e-08	1.83537e-05
14	175000	14	215000	89	2.5009e-08	1.88182e-05
12	2265000	9	105000	6	2.54457e-08	1.91362e-05
3	215000	4	485000	16	2.54805e-08	1.9157e-05
12	1275000	6	455000	16	2.54939e-08	1.91618e-05
7	225000	7	265000	95	2.55297e-08	1.91834e-05
4	265000	4	295000	219	2.5581e-08	1.92167e-05
4	35000	6	1365000	9	2.60262e-08	1.95349e-05
1	315000	1	345000	139	2.60523e-08	1.95491e-05
9	455000	9	505000	113	2.61444e-08	1.96127e-05
13	35000	13	75000	23	2.61932e-08	1.96385e-05
14	1755000	14	1825000	74	2.62043e-08	1.96414e-05
12	495000	12	525000	118	2.62391e-08	1.96566e-05
5	865000	5	925000	96	2.64882e-08	1.98323e-05
8	645000	8	675000	123	2.66541e-08	1.9951e-05
1	455000	13	1155000	10	2.68256e-08	2.00738e-05
6	495000	9	1255000	17	2.68893e-08	2.0116e-05
12	1365000	2	305000	18	2.69911e-08	2.01754e-05
14	1085000	3	615000	14	2.70971e-08	2.02491e-05
14	1815000	14	1855000	100	2.70973e-08	2.02491e-05
9	345000	9	375000	81	2.72038e-08	2.03177e-05
9	835000	9	885000	118	2.74175e-08	2.04717e-05
12	1275000	7	795000	18	2.74567e-08	2.04952e-05
13	2895000	2	25000	7	2.75258e-08	2.05412e-05
14	1085000	3	575000	18	2.75741e-08	2.05716e-05
13	1155000	6	415000	15	2.76722e-08	2.06391e-05
13	1195000	7	815000	14	2.77137e-08	2.06644e-05
4	665000	9	1245000	10	2.77618e-08	2.06889e-05
4	55000	4	965000	14	2.79737e-08	2.08411e-05
7	1265000	7	1295000	74	2.82064e-08	2.10087e-05
11	35000	9	25000	10	2.82736e-08	2.1053e-05
2	425000	4	635000	14	2.85368e-08	2.12431e-05
5	465000	6	485000	12	2.86308e-08	2.13073e-05
9	755000	9	785000	122	2.86559e-08	2.13201e-05
11	435000	11	485000	71	2.86798e-08	2.13321e-05
7	185000	7	275000	129	2.87077e-08	2.13469e-05
14	1745000	14	1775000	107	2.87264e-08	2.1355e-05
1	475000	3	605000	10	2.89569e-08	2.15204e-05
10	1625000	12	35000	11	2.90863e-08	2.16048e-05
12	1015000	9	1445000	11	2.9182e-08	2.16699e-05
11	1825000	11	1865000	82	2.94143e-08	2.18365e-05
11	825000	5	475000	18	2.94852e-08	2.18832e-05
11	835000	3	585000	10	2.95489e-08	2.19244e-05
5	445000	9	1225000	16	2.98099e-08	2.21121e-05
1	35000	3	115000	13	3.00013e-08	2.2248e-05
3	205000	3	245000	95	3.00775e-08	2.22983e-05
10	945000	7	795000	18	3.01707e-08	2.23613e-05
14	1055000	3	575000	19	3.02455e-08	2.24045e-05
8	1055000	8	1115000	123	3.0695e-08	2.27066e-05
3	595000	8	315000	13	3.07843e-08	2.27664e-05
10	585000	9	755000	14	3.09654e-08	2.28941e-05
14	1055000	7	795000	21	3.1076e-08	2.29634e-05
1	355000	13	1205000	14	3.11441e-08	2.30074e-05
13	555000	13	605000	95	3.13224e-08	2.31328e-05
2	505000	7	765000	18	3.14846e-08	2.32463e-05
10	1425000	10	1455000	109	3.15098e-08	2.32528e-05
1	485000	10	745000	12	3.16658e-08	2.3361e-05
13	1175000	4	655000	14	3.1753e-08	2.34127e-05
6	475000	8	305000	9	3.20859e-08	2.36517e-05
3	605000	5	435000	11	3.21312e-08	2.36723e-05
8	1305000	9	145000	14	3.2297e-08	2.37879e-05
1	525000	1	615000	37	3.25175e-08	2.39439e-05
5	1245000	7	1055000	17	3.28137e-08	2.41555e-05
7	1195000	7	1265000	75	3.29608e-08	2.42572e-05
12	1295000	7	805000	13	3.2978e-08	2.42632e-05
10	945000	12	1275000	15	3.30098e-08	2.428e-05
13	595000	13	2015000	23	3.30232e-08	2.42809e-05
14	2615000	14	2665000	101	3.30199e-08	2.42809e-05
4	105000	4	145000	105	3.30975e-08	2.43248e-05
14	1105000	5	475000	15	3.31613e-08	2.43585e-05
5	1305000	5	1335000	86	3.33554e-08	2.44878e-05
13	2155000	13	2195000	82	3.36347e-08	2.46795e-05
4	135000	4	1165000	19	3.37592e-08	2.47642e-05
5	645000	9	355000	13	3.38112e-08	2.47956e-05
8	35000	8	445000	18	3.38177e-08	2.47956e-05
11	1325000	11	1375000	93	3.40699e-08	2.49651e-05
4	1165000	6	735000	12	3.4139e-08	2.5009e-05
12	2015000	6	1285000	14	3.43834e-08	2.51813e-05
4	935000	7	555000	15	3.43983e-08	2.51854e-05
3	605000	9	1255000	12	3.46878e-08	2.53905e-05
12	295000	12	2015000	21	3.482e-08	2.54804e-05
12	1265000	7	835000	18	3.49299e-08	2.55539e-05
11	855000	13	1175000	19	3.50652e-08	2.5646e-05
7	55000	7	565000	10	3.51319e-08	2.56879e-05
3	55000	7	585000	5	3.52702e-08	2.57751e-05
14	2985000	14	3035000	71	3.53372e-08	2.58171e-05
2	465000	5	445000	18	3.54594e-08	2.58994e-05
12	55000	9	1455000	10	3.55698e-08	2.59731e-05
12	1665000	12	1705000	84	3.56762e-08	2.60368e-05
3	595000	5	475000	14	3.59992e-08	2.62584e-05
13	1945000	13	1975000	146	3.6207e-08	2.64028e-05
1	35000	5	95000	11	3.62824e-08	2.64507e-05
4	635000	7	805000	11	3.6368e-08	2.64989e-05
13	2645000	13	2715000	77	3.64398e-08	2.65441e-05
13	2575000	13	2615000	95	3.66127e-08	2.66629e-05
10	965000	12	1225000	20	3.6685e-08	2.67084e-05
4	115000	4	1175000	13	3.70777e-08	2.69681e-05
9	425000	9	485000	78	3.70715e-08	2.69681e-05
14	1685000	14	1795000	75	3.72114e-08	2.70554e-05
10	75000	10	1555000	18	3.72386e-08	2.70679e-05
14	1045000	7	785000	18	3.72491e-08	2.70683e-05
11	835000	12	1275000	12	3.75638e-08	2.72824e-05
12	1285000	6	495000	14	3.75657e-08	2.72824e-05
4	55000	6	1365000	11	3.78523e-08	2.74772e-05
1	475000	3	545000	12	3.79653e-08	2.75446e-05
12	1245000	2	465000	16	3.81625e-08	2.76802e-05
3	615000	7	795000	15	3.81794e-08	2.76851e-05
2	475000	5	475000	16	3.83001e-08	2.77652e-05
4	255000	4	285000	182	3.85205e-08	2.791e-05
4	1125000	4	1175000	57	3.85388e-08	2.79159e-05
3	615000	9	1215000	12	3.85627e-08	2.79257e-05
10	1615000	12	2205000	5	3.87843e-08	2.80787e-05
13	1445000	7	285000	5	3.87938e-08	2.80787e-05
12	55000	4	1135000	10	3.89017e-08	2.81487e-05
2	475000	7	795000	18	3.90785e-08	2.82691e-05
14	3285000	5	1345000	5	3.90972e-08	2.82751e-05
2	505000	2	555000	131	3.91669e-08	2.8318e-05
11	1735000	8	1115000	12	3.9193e-08	2.83293e-05
6	175000	6	205000	178	3.92119e-08	2.83354e-05
5	1265000	7	1135000	18	3.92343e-08	2.8344e-05
12	305000	12	1925000	13	3.94077e-08	2.84617e-05
13	1155000	6	485000	12	3.94193e-08	2.84626e-05
10	935000	12	1295000	11	3.98469e-08	2.8756e-05
5	445000	6	495000	20	3.99718e-08	2.88385e-05
4	765000	4	805000	153	4.00417e-08	2.88812e-05
8	35000	8	1395000	15	4.00716e-08	2.88952e-05
11	45000	6	1365000	9	4.01234e-08	2.89248e-05
13	225000	13	295000	54	4.0198e-08	2.89709e-05
14	5000	14	3255000	6	4.0236e-08	2.89905e-05
13	325000	13	365000	134	4.0516e-08	2.91768e-05
1	125000	4	525000	14	4.08374e-08	2.94005e-05
11	515000	9	705000	8	4.09318e-08	2.94373e-05
2	725000	2	755000	156	4.1132e-08	2.95734e-05
14	2105000	7	345000	11	4.1172e-08	2.95943e-05
10	955000	3	595000	12	4.12163e-08	2.96183e-05
12	185000	9	345000	13	4.12722e-08	2.96446e-05
1	465000	5	415000	14	4.12638e-08	2.96446e-05
10	565000	8	905000	16	4.1631e-08	2.98847e-05
5	845000	5	1275000	39	4.21702e-08	3.02637e-05
7	555000	8	1435000	11	4.23758e-08	3.04033e-05
5	1335000	6	5000	11	4.24309e-08	3.04348e-05
11	35000	8	45000	13	4.24499e-08	3.04404e-05
11	1325000	11	1385000	77	4.25361e-08	3.04941e-05
11	2025000	3	35000	9	4.25792e-08	3.05169e-05
14	1085000	8	285000	13	4.28632e-08	3.07124e-05
5	465000	8	315000	14	4.29995e-08	3.07938e-05
14	1065000	4	655000	10	4.30933e-08	3.08528e-05
4	565000	4	965000	12	4.31403e-08	3.08784e-05
1	545000	8	335000	10	4.33739e-08	3.10373e-05
14	3155000	14	3185000	71	4.3426e-08	3.10665e-05
5	385000	7	785000	19	4.37519e-08	3.12831e-05
2	25000	4	145000	11	4.40675e-08	3.15005e-05
12	1275000	6	465000	10	4.40998e-08	3.15153e-05
8	415000	8	465000	145	4.453e-08	3.18144e-05
3	575000	7	785000	20	4.45845e-08	3.18449e-05
7	525000	7	645000	12	4.45963e-08	3.1845e-05
13	2555000	5	1295000	8	4.48293e-08	3.20029e-05
4	1125000	4	1155000	60	4.50844e-08	3.21766e-05
10	25000	12	2245000	8	4.51109e-08	3.2187e-05
11	55000	12	2195000	6	4.51216e-08	3.2187e-05
6	1125000	9	105000	17	4.52902e-08	3.22895e-05
4	615000	5	445000	17	4.57872e-08	3.26267e-05
4	965000	4	995000	60	4.58204e-08	3.26418e-05
5	1135000	8	1265000	10	4.61441e-08	3.28552e-05
14	2955000	14	2995000	81	4.62831e-08	3.29455e-05
6	1135000	6	1165000	214	4.64247e-08	3.30376e-05
12	1305000	2	415000	16	4.64735e-08	3.30637e-05
10	1625000	14	405000	10	4.67628e-08	3.32521e-05
14	235000	14	2755000	18	4.68951e-08	3.33375e-05
13	1225000	9	1205000	14	4.71433e-08	3.34964e-05
4	1055000	4	1085000	113	4.73454e-08	3.36312e-05
4	535000	4	975000	27	4.78664e-08	3.39923e-05
11	835000	9	1235000	11	4.7937e-08	3.40336e-05
3	565000	3	595000	121	4.80618e-08	3.41133e-05
4	45000	4	85000	28	4.82686e-08	3.42511e-05
4	645000	7	825000	7	4.83486e-08	3.42989e-05
11	1595000	11	1685000	97	4.86519e-08	3.4496e-05
14	2155000	9	365000	11	4.93978e-08	3.50066e-05
13	2445000	13	2475000	137	4.9437e-08	3.50253e-05
11	425000	11	495000	111	4.97115e-08	3.52106e-05
2	825000	3	995000	10	4.97781e-08	3.52486e-05
1	575000	1	635000	10	4.98588e-08	3.52873e-05
10	1245000	13	1205000	14	5.02155e-08	3.55213e-05
4	135000	4	1095000	24	5.02183e-08	3.55213e-05
8	1145000	8	1235000	62	5.02218e-08	3.55213e-05
1	565000	4	965000	8	5.0321e-08	3.55588e-05
14	3095000	14	3145000	113	5.03937e-08	3.56009e-05
1	155000	1	195000	165	5.06873e-08	3.57897e-05
6	785000	7	1315000	10	5.06956e-08	3.57897e-05
13	2865000	4	55000	8	5.07679e-08	3.58186e-05
2	25000	4	65000	6	5.07938e-08	3.58276e-05
8	1125000	8	1185000	127	5.12287e-08	3.6125e-05
11	2025000	4	55000	11	5.14455e-08	3.62591e-05
6	785000	6	865000	59	5.17115e-08	3.64371e-05
2	495000	8	295000	14	5.17509e-08	3.64459e-05
8	45000	8	1415000	13	5.25064e-08	3.69684e-05
11	25000	7	45000	7	5.27461e-08	3.71275e-05
10	945000	13	1185000	13	5.28485e-08	3.719e-05
14	645000	9	1025000	11	5.35401e-08	3.76571e-05
12	635000	14	695000	12	5.36268e-08	3.77084e-05
5	305000	5	635000	32	5.39576e-08	3.79213e-05
12	1295000	13	1165000	8	5.44648e-08	3.8258e-05
7	775000	9	1215000	15	5.46084e-08	3.83489e-05
3	945000	3	975000	144	5.48543e-08	3.85117e-05
14	1995000	14	3105000	25	5.51194e-08	3.86878e-05
11	35000	4	65000	7	5.64313e-08	3.95984e-05
7	175000	7	205000	135	5.66446e-08	3.97378e-05
4	55000	7	585000	10	5.70245e-08	3.99733e-05
4	655000	7	805000	11	5.71389e-08	4.00432e-05
4	975000	7	55000	6	5.7167e-08	4.00525e-05
1	305000	9	1225000	14	5.72889e-08	4.01276e-05
8	45000	8	455000	23	5.72998e-08	4.01276e-05
4	635000	7	835000	13	5.75291e-08	4.0275e-05
6	115000	6	155000	120	5.76037e-08	4.03169e-05
14	1075000	9	1225000	10	5.77516e-08	4.041e-05
7	795000	9	1235000	16	5.79042e-08	4.04959e-05
11	1605000	11	1655000	85	5.83708e-08	4.08012e-05
10	1035000	8	265000	16	5.85678e-08	4.09178e-05
10	905000	5	445000	18	5.85863e-08	4.09202e-05
11	1965000	11	2035000	73	5.86847e-08	4.09784e-05
9	265000	9	315000	102	5.87067e-08	4.09832e-05
14	2635000	14	2665000	108	5.91226e-08	4.1263e-05
14	485000	14	515000	259	5.91353e-08	4.1263e-05
14	3105000	9	65000	7	5.92163e-08	4.13072e-05
14	1025000	5	365000	17	5.92593e-08	4.13105e-05
2	435000	4	635000	10	5.95351e-08	4.14656e-05
4	925000	4	1085000	59	5.95468e-08	4.14656e-05
13	1805000	6	1155000	12	5.95727e-08	4.14705e-05
4	665000	5	475000	16	5.97248e-08	4.15658e-05
6	485000	9	1255000	12	5.98312e-08	4.16291e-05
2	465000	6	495000	17	5.99549e-08	4.17045e-05
13	535000	13	605000	107	6.02302e-08	4.18745e-05
1	285000	3	455000	16	6.02574e-08	4.18828e-05
11	1875000	11	2035000	31	6.03774e-08	4.19554e-05
11	2035000	12	2195000	8	6.03796e-08	4.19554e-05
14	15000	14	3175000	8	6.06754e-08	4.21409e-05
13	1185000	2	425000	14	6.07062e-08	4.21515e-05
14	3175000	14	3235000	38	6.08095e-08	4.22017e-05
5	465000	6	495000	16	6.08482e-08	4.22177e-05
7	1125000	9	1505000	8	6.10196e-08	4.23259e-05
2	35000	2	915000	7	6.12546e-08	4.2478e-05
4	645000	9	1235000	8	6.12666e-08	4.2478e-05
13	1165000	4	635000	7	6.16069e-08	4.27005e-05
14	675000	14	775000	58	6.16696e-08	4.27331e-05
10	945000	2	465000	15	6.23712e-08	4.31972e-05
1	425000	7	785000	18	6.24242e-08	4.32229e-05
13	45000	13	75000	26	6.25133e-08	4.32735e-05
11	825000	4	635000	14	6.27695e-08	4.34398e-05
11	2035000	14	25000	6	6.32203e-08	4.37406e-05
4	235000	6	1215000	13	6.35903e-08	4.39854e-05
9	105000	9	155000	91	6.37058e-08	4.40541e-05
1	35000	5	1325000	9	6.38071e-08	4.41024e-05
2	45000	9	25000	6	6.37919e-08	4.41024e-05
7	25000	7	565000	14	6.3873e-08	4.4136e-05
10	345000	12	795000	12	6.43065e-08	4.44181e-05
13	2725000	13	2755000	71	6.45334e-08	4.45583e-05
9	155000	9	205000	113	6.48879e-08	4.47917e-05
10	1095000	6	615000	9	6.49881e-08	4.48495e-05
3	565000	8	315000	15	6.50765e-08	4.48991e-05
4	115000	4	1165000	15	6.51471e-08	4.49363e-05
6	1255000	6	1285000	108	6.54867e-08	4.51477e-05
13	1605000	13	2545000	22	6.57201e-08	4.52971e-05
12	295000	14	1735000	19	6.58872e-08	4.54007e-05
10	1555000	8	25000	12	6.64951e-08	4.5808e-05
3	115000	9	425000	18	6.65656e-08	4.58449e-05
1	455000	12	1295000	10	6.69798e-08	4.61185e-05
2	865000	2	915000	23	6.7228e-08	4.62659e-05
12	1295000	3	635000	14	6.78818e-08	4.66804e-05
14	1725000	14	1785000	94	6.86418e-08	4.71791e-05
12	1285000	9	1285000	13	6.93899e-08	4.76692e-05
1	595000	8	35000	8	6.96925e-08	4.78649e-05
10	55000	9	1505000	7	6.97545e-08	4.78954e-05
12	755000	2	305000	12	7.04001e-08	4.83143e-05
11	2025000	2	25000	9	7.04515e-08	4.83225e-05
1	465000	14	1055000	15	7.04299e-08	4.83225e-05
11	1835000	9	665000	15	7.07772e-08	4.84894e-05
13	2385000	13	2425000	106	7.07623e-08	4.84894e-05
4	995000	4	1175000	25	7.08382e-08	4.85168e-05
11	595000	5	385000	11	7.10435e-08	4.86452e-05
12	2245000	6	5000	10	7.12193e-08	4.87532e-05
13	2495000	13	2815000	49	7.12298e-08	4.87532e-05
14	3235000	8	1395000	9	7.27448e-08	4.97599e-05
10	15000	12	1045000	6	7.28201e-08	4.97989e-05
5	465000	9	1255000	14	7.3031e-08	4.99306e-05
11	825000	13	1155000	16	7.31472e-08	4.99974e-05
14	2275000	14	2865000	30	7.3317e-08	5.01009e-05
2	475000	3	575000	16	7.34343e-08	5.01684e-05
10	925000	3	605000	10	7.40228e-08	5.05577e-05
7	235000	7	265000	97	7.41596e-08	5.06384e-05
12	2115000	13	2815000	20	7.44662e-08	5.0831e-05
5	65000	9	115000	9	7.44604e-08	5.0831e-05
6	445000	6	475000	97	7.45271e-08	5.0851e-05
11	2015000	3	885000	10	7.48765e-08	5.10765e-05
11	1645000	11	1675000	97	7.50364e-08	5.11728e-05
9	25000	9	85000	38	7.52211e-08	5.12858e-05
11	115000	14	1715000	9	7.52753e-08	5.13099e-05
1	485000	4	495000	13	7.53586e-08	5.13538e-05
14	705000	5	835000	15	7.55248e-08	5.14542e-05
11	855000	13	1185000	15	7.56294e-08	5.15125e-05
2	25000	8	85000	10	7.5765e-08	5.15919e-05
9	795000	9	845000	88	7.64541e-08	5.20351e-05
14	2935000	14	3025000	54	7.73713e-08	5.26461e-05
1	405000	1	465000	87	7.7623e-08	5.27939e-05
7	595000	7	1385000	12	7.7608e-08	5.27939e-05
11	1895000	7	455000	10	7.78416e-08	5.29263e-05
14	1685000	14	1745000	84	7.82124e-08	5.31651e-05
14	1095000	2	415000	13	7.86747e-08	5.3466e-05
5	45000	5	1285000	16	7.94444e-08	5.39756e-05
7	1315000	9	325000	8	7.97525e-08	5.41578e-05
13	2475000	13	2525000	94	8.01044e-08	5.43832e-05
12	1875000	13	195000	11	8.11315e-08	5.4998e-05
12	315000	12	435000	64	8.11708e-08	5.50109e-05
3	945000	4	755000	14	8.11933e-08	5.50124e-05
12	2245000	6	1335000	8	8.1331e-08	5.50919e-05
6	455000	8	315000	15	8.13867e-08	5.51159e-05
11	1245000	11	1285000	127	8.14962e-08	5.51763e-05
11	1455000	14	1605000	11	8.20561e-08	5.55416e-05
12	1245000	9	1275000	12	8.25077e-08	5.58333e-05
12	595000	12	625000	153	8.27688e-08	5.59961e-05
12	35000	2	155000	14	8.28792e-08	5.60568e-05
11	275000	11	305000	217	8.2928e-08	5.60758e-05
12	295000	13	365000	16	8.32332e-08	5.62402e-05
14	3215000	6	5000	10	8.35519e-08	5.64415e-05
11	175000	7	1015000	15	8.36883e-08	5.65196e-05
11	2005000	2	85000	10	8.39717e-08	5.66828e-05
14	2985000	14	3075000	46	8.41427e-08	5.67657e-05
1	555000	4	1135000	8	8.41364e-08	5.67657e-05
14	1195000	14	1225000	113	8.42891e-08	5.68406e-05
11	1595000	11	1625000	144	8.43776e-08	5.68861e-05
1	135000	2	35000	7	8.46182e-08	5.702e-05
13	1195000	8	315000	13	8.47363e-08	5.70854e-05
5	475000	8	265000	19	8.48451e-08	5.71445e-05
4	635000	5	465000	12	8.57688e-08	5.77523e-05
7	85000	7	535000	23	8.58239e-08	5.77751e-05
12	445000	12	475000	116	8.59494e-08	5.78452e-05
6	1175000	9	985000	12	8.62514e-08	5.80341e-05
2	785000	7	355000	12	8.66063e-08	5.8244e-05
10	705000	14	935000	8	8.67555e-08	5.83299e-05
2	525000	5	365000	15	8.77498e-08	5.89547e-05
4	135000	4	1075000	10	8.81227e-08	5.91905e-05
14	465000	8	1085000	18	8.81809e-08	5.9215e-05
4	165000	6	5000	10	8.83938e-08	5.93433e-05
4	55000	4	1155000	12	8.8404e-08	5.93433e-05
1	615000	4	1085000	11	8.90568e-08	5.97589e-05
5	735000	5	865000	45	8.93836e-08	5.99633e-05
7	35000	8	135000	9	8.96735e-08	6.01429e-05
8	265000	9	1225000	16	8.97043e-08	6.01487e-05
2	45000	7	75000	5	9.01199e-08	6.04125e-05
13	1205000	5	445000	17	9.07421e-08	6.08127e-05
6	585000	8	325000	18	9.09532e-08	6.0926e-05
11	1845000	11	1895000	50	9.10913e-08	6.10034e-05
3	625000	9	1255000	17	9.20448e-08	6.16116e-05
10	695000	10	725000	114	9.34074e-08	6.2496e-05
14	1055000	3	625000	20	9.3389e-08	6.2496e-05
1	565000	3	5000	4	9.34578e-08	6.2496e-05
9	95000	9	1455000	11	9.3422e-08	6.2496e-05
11	1445000	11	1475000	106	9.34851e-08	6.24987e-05
1	465000	2	425000	14	9.34911e-08	6.24987e-05
8	1125000	8	1205000	70	9.34949e-08	6.24987e-05
1	475000	7	805000	10	9.35934e-08	6.25249e-05
13	1175000	5	425000	17	9.40599e-08	6.2821e-05
4	265000	4	1095000	29	9.48813e-08	6.33541e-05
2	65000	2	865000	11	9.55293e-08	6.37554e-05
8	595000	8	625000	160	9.56188e-08	6.37994e-05
13	2515000	13	2545000	79	9.7242e-08	6.48347e-05
11	845000	14	1055000	13	9.76661e-08	6.51015e-05
12	295000	12	495000	41	9.78608e-08	6.52153e-05
7	1115000	7	1195000	88	9.82518e-08	6.54598e-05
9	145000	9	245000	67	9.82833e-08	6.54647e-05
8	315000	9	1255000	14	9.85251e-08	6.56096e-05
5	135000	5	1085000	20	9.8635e-08	6.56507e-05
7	1165000	7	1205000	224	9.88345e-08	6.57674e-05
14	665000	14	705000	104	9.89185e-08	6.58071e-05
12	1715000	12	2205000	7	1.00287e-07	6.66682e-05
1	535000	1	565000	79	1.00328e-07	6.66797e-05
4	35000	4	935000	14	1.00806e-07	6.69645e-05
13	325000	13	355000	97	1.01063e-07	6.71185e-05
10	625000	10	1485000	18	1.01446e-07	6.73402e-05
12	1275000	3	625000	17	1.01583e-07	6.74102e-05
4	85000	4	1175000	10	1.01976e-07	6.76257e-05
12	2015000	12	2075000	69	1.02321e-07	6.78381e-05
1	35000	6	1375000	8	1.02656e-07	6.80438e-05
10	935000	7	805000	9	1.02938e-07	6.82137e-05
13	1165000	8	295000	7	1.02939e-07	6.82137e-05
11	855000	12	1275000	17	1.03058e-07	6.82469e-05
12	1445000	12	1475000	295	1.03401e-07	6.84539e-05
10	855000	10	885000	166	1.0359e-07	6.85623e-05
8	425000	8	535000	39	1.03777e-07	6.86692e-05
12	335000	12	525000	40	1.04508e-07	6.91192e-05
13	445000	13	2465000	18	1.04787e-07	6.92698e-05
10	1265000	5	865000	12	1.05002e-07	6.93785e-05
13	1195000	5	475000	14	1.05084e-07	6.94156e-05
1	35000	10	45000	6	1.05615e-07	6.97495e-05
13	2765000	13	2815000	138	1.05899e-07	6.99079e-05
7	25000	8	45000	9	1.05881e-07	6.99079e-05
9	315000	9	345000	143	1.06241e-07	7.00949e-05
13	2035000	13	2075000	99	1.06285e-07	7.01069e-05
11	1975000	2	865000	8	1.06737e-07	7.03875e-05
6	1235000	6	1285000	125	1.07262e-07	7.07168e-05
11	795000	6	185000	16	1.07845e-07	7.10838e-05
3	565000	8	325000	16	1.08453e-07	7.14499e-05
12	1295000	3	575000	16	1.08555e-07	7.14998e-05
11	1975000	14	2855000	9	1.10414e-07	7.26711e-05
9	845000	9	875000	92	1.10754e-07	7.28774e-05
11	1305000	11	1575000	19	1.11006e-07	7.30256e-05
12	355000	12	385000	128	1.11346e-07	7.32312e-05
7	345000	7	385000	114	1.11657e-07	7.34184e-05
13	2225000	13	2255000	179	1.11759e-07	7.34676e-05
7	115000	7	1295000	17	1.13055e-07	7.42837e-05
14	3115000	14	3145000	82	1.13746e-07	7.47193e-05
14	1395000	14	1425000	233	1.14051e-07	7.49018e-05
13	2285000	13	2315000	108	1.14153e-07	7.49505e-05
11	445000	11	475000	107	1.14294e-07	7.50252e-05
2	675000	3	85000	12	1.14611e-07	7.52152e-05
11	1685000	11	1715000	139	1.14663e-07	7.52306e-05
11	555000	11	585000	107	1.15445e-07	7.57072e-05
14	2345000	14	2405000	99	1.15559e-07	7.57639e-05
10	185000	8	895000	11	1.16014e-07	7.60439e-05
1	105000	4	1195000	5	1.16035e-07	7.60439e-05
14	1995000	14	2035000	111	1.16055e-07	7.60439e-05
5	1175000	7	1345000	12	1.1632e-07	7.61893e-05
14	85000	14	2465000	16	1.16489e-07	7.62817e-05
13	1755000	8	795000	7	1.16777e-07	7.64334e-05
1	465000	6	515000	13	1.16889e-07	7.64884e-05
14	2615000	14	2655000	127	1.17026e-07	7.65589e-05
12	275000	5	1025000	15	1.1722e-07	7.66677e-05
4	935000	4	1135000	23	1.18318e-07	7.73299e-05
12	1665000	7	515000	11	1.18425e-07	7.7373e-05
4	745000	4	785000	124	1.18412e-07	7.7373e-05
1	455000	8	285000	8	1.18612e-07	7.74474e-05
10	215000	2	15000	6	1.19147e-07	7.77783e-05
12	345000	12	375000	102	1.19348e-07	7.78907e-05
1	565000	8	25000	9	1.19404e-07	7.79085e-05
14	135000	8	445000	7	1.19782e-07	7.81361e-05
7	45000	7	1425000	9	1.19827e-07	7.81473e-05
1	465000	9	1205000	12	1.19961e-07	7.82156e-05
12	845000	12	895000	124	1.20058e-07	7.82601e-05
11	815000	14	1075000	11	1.2028e-07	7.83861e-05
12	35000	8	25000	12	1.20292e-07	7.83861e-05
14	3005000	14	3105000	59	1.20384e-07	7.83975e-05
7	115000	7	1275000	37	1.20828e-07	7.86673e-05
[truncated: 30,028 more rows]

## Sheet: TROPHOZOITES-XL-FDR_0.1
Locus 1		Locus 2		Raw contact count	After ICE normalization
Chr.	Mid (10 kb)	Chr.	Mid (10 kb)		p-value	q-value
12	1695000	12	1725000	441	6.23755e-278	3.46283e-273		FDR <0.01
8	435000	8	465000	419	4.25361e-214	1.70162e-209		FDR >=0.01 and <0.05
7	555000	7	585000	356	2.43122e-176	6.35922e-172		FDR >=0.05 and <0.1
1	35000	1	615000	97	4.88077e-139	9.35003e-135
7	545000	7	575000	211	5.37809e-135	1.00205e-130		FISH pairs
11	825000	7	815000	97	1.63951e-131	2.97328e-127
12	1695000	12	1735000	209	2.45962e-130	4.43103e-126
4	55000	4	1165000	92	8.15809e-130	1.41352e-125
7	555000	7	595000	262	2.36406e-127	3.99435e-123
7	545000	7	595000	193	2.05306e-126	3.44747e-122
4	965000	4	1165000	120	1.9734e-122	3.19535e-118
4	975000	4	1165000	130	5.68571e-121	8.99227e-117
7	535000	7	585000	181	2.8226e-114	3.95787e-110
7	535000	7	595000	163	9.14706e-109	1.18488e-104
7	545000	7	585000	189	2.25161e-104	2.71018e-100
11	825000	13	1175000	82	3.6826e-101	4.24479e-97
12	15000	12	55000	176	2.65911e-100	2.97675e-96
4	255000	4	295000	492	2.82787e-100	3.14935e-96
6	1335000	6	1365000	175	4.12129e-99	4.44883e-95
12	1705000	12	1735000	162	5.65522e-98	6.00928e-94
7	515000	7	545000	185	5.38948e-96	5.59575e-92
4	55000	4	85000	182	7.97989e-95	8.09982e-91
4	55000	4	965000	66	9.32169e-94	9.28849e-90
7	535000	7	575000	150	7.32893e-93	7.22345e-89
4	265000	4	295000	461	8.64045e-92	8.39444e-88
13	1175000	7	815000	71	2.11436e-90	2.00406e-86
7	515000	7	555000	178	1.91438e-76	1.43067e-72
6	5000	6	1365000	54	2.95652e-74	2.12766e-70
4	935000	4	975000	187	3.9533e-74	2.8152e-70
11	825000	6	475000	64	4.02958e-74	2.86203e-70
6	1135000	6	1165000	418	5.14672e-74	3.6365e-70
6	475000	7	815000	60	8.87342e-74	6.25341e-70
7	515000	7	585000	98	3.70331e-73	2.60311e-69
11	1935000	11	1965000	251	6.62932e-73	4.64784e-69
4	25000	4	55000	123	1.49643e-72	1.0411e-68
9	705000	9	735000	321	6.76533e-72	4.64737e-68
4	965000	4	1175000	72	4.32755e-71	2.95041e-67
12	25000	12	55000	132	1.2584e-70	8.47325e-67
7	565000	7	595000	173	6.85273e-70	4.54667e-66
4	35000	4	1165000	49	2.27768e-69	1.4966e-65
7	535000	7	565000	198	7.69752e-69	4.99747e-65
4	55000	4	1175000	50	2.50387e-66	1.55153e-62
12	35000	12	65000	163	3.33247e-66	2.06028e-62
11	2025000	5	1335000	44	1.54555e-65	9.40565e-62
4	35000	4	1175000	42	1.23473e-63	7.20772e-60
12	1285000	7	815000	47	2.27955e-63	1.32217e-59
5	1335000	7	1425000	42	6.10617e-63	3.51917e-59
12	1685000	12	1725000	168	4.0972e-62	2.31715e-58
7	575000	7	605000	143	6.58138e-62	3.69138e-58
4	975000	4	1155000	66	1.07823e-61	5.99814e-58
4	965000	4	1155000	60	2.7473e-61	1.51284e-57
11	825000	12	1275000	54	3.77666e-61	2.07128e-57
4	45000	4	1165000	42	8.13985e-61	4.42853e-57
4	55000	4	975000	50	1.49877e-60	8.13784e-57
1	35000	10	1645000	35	3.44775e-60	1.8426e-56
10	945000	6	475000	51	7.54065e-60	4.00638e-56
10	35000	10	1645000	37	3.34124e-59	1.75465e-55
14	1385000	14	1425000	433	3.46877e-59	1.81812e-55
4	1135000	4	1165000	150	5.15377e-59	2.68576e-55
7	555000	7	605000	192	8.59324e-59	4.45257e-55
4	975000	4	1175000	69	9.04869e-59	4.67965e-55
14	2505000	14	2535000	333	2.03964e-58	1.05083e-54
4	55000	4	1155000	41	6.86531e-57	3.45204e-53
5	465000	7	815000	47	9.46445e-57	4.75017e-53
7	1395000	7	1425000	110	1.06022e-56	5.31142e-53
11	2035000	5	1335000	36	1.65613e-56	8.28148e-53
10	945000	11	825000	51	1.74083e-56	8.68906e-53
12	1295000	13	1175000	50	3.77842e-56	1.86879e-52
9	255000	9	285000	381	4.80503e-56	2.36366e-52
2	455000	7	815000	43	6.44266e-56	3.16351e-52
11	825000	2	445000	48	8.21323e-56	4.01839e-52
12	1685000	12	1735000	115	8.76769e-56	4.28196e-52
4	935000	4	965000	164	1.00902e-55	4.91902e-52
4	1125000	4	1165000	180	1.68224e-55	8.14265e-52
14	1735000	14	1765000	468	2.96559e-55	1.42279e-51
7	535000	7	605000	122	6.12516e-55	2.91296e-51
1	615000	9	1505000	30	1.53139e-54	7.14545e-51
8	425000	8	465000	207	1.75158e-54	8.14492e-51
7	515000	7	595000	76	2.26327e-53	1.02441e-49
6	1115000	6	1145000	353	2.96771e-53	1.33438e-49
3	755000	3	785000	338	4.85382e-53	2.16455e-49
6	1125000	6	1155000	248	1.89351e-52	8.32128e-49
2	445000	7	815000	43	2.41662e-52	1.05689e-48
11	825000	12	1285000	43	2.60952e-52	1.13578e-48
11	2005000	11	2035000	118	3.51183e-52	1.5212e-48
14	705000	14	735000	307	9.43096e-52	4.05931e-48
7	545000	7	605000	127	1.63702e-51	7.00181e-48
11	2035000	6	5000	33	3.98985e-51	1.68795e-47
7	515000	7	575000	71	5.15137e-51	2.17258e-47
12	1165000	12	1195000	372	1.60576e-50	6.66888e-47
14	1395000	14	1425000	391	2.04014e-50	8.43428e-47
13	35000	13	65000	57	3.82118e-50	1.57019e-46
13	1175000	6	485000	40	4.96015e-50	2.02902e-46
11	825000	9	1235000	44	6.14786e-50	2.50358e-46
11	825000	7	795000	52	8.36637e-50	3.40192e-46
11	825000	12	1295000	47	1.18094e-49	4.78762e-46
13	1175000	5	465000	44	1.1958e-49	4.84065e-46
10	945000	13	1175000	45	1.32832e-49	5.36908e-46
4	555000	4	615000	101	1.75126e-49	7.05766e-46
12	2195000	9	65000	22	2.38844e-49	9.58294e-46
7	815000	8	295000	40	3.80872e-49	1.52141e-45
11	25000	11	2025000	36	1.36414e-48	5.35474e-45
11	1885000	11	1955000	238	1.50103e-48	5.86671e-45
11	35000	12	2245000	35	1.75587e-48	6.82349e-45
12	1295000	7	815000	43	4.19455e-48	1.61619e-44
6	475000	8	295000	40	6.46692e-48	2.48824e-44
11	1475000	11	1505000	362	7.94204e-48	3.05149e-44
12	1705000	12	2245000	44	8.97065e-48	3.43699e-44
6	5000	6	35000	89	1.05141e-47	4.01703e-44
8	1405000	8	1435000	122	2.5356e-47	9.5799e-44
6	485000	7	815000	37	3.52046e-47	1.3191e-43
11	825000	3	595000	41	7.32678e-47	2.7228e-43
4	555000	4	605000	79	8.98144e-47	3.32408e-43
4	35000	4	975000	35	1.06499e-46	3.92026e-43
11	1965000	13	2815000	60	1.07944e-46	3.96807e-43
12	35000	12	2245000	38	1.15194e-46	4.22888e-43
4	55000	4	165000	85	1.81747e-46	6.62739e-43
2	645000	2	675000	364	1.88614e-46	6.86859e-43
11	25000	13	2895000	26	3.05558e-46	1.10349e-42
7	815000	9	1235000	39	3.05456e-46	1.10349e-42
12	2195000	12	2245000	95	5.19632e-46	1.85992e-42
4	285000	4	315000	195	6.05173e-46	2.16326e-42
12	1285000	8	295000	34	6.51548e-46	2.31988e-42
13	1175000	5	445000	47	7.8592e-46	2.78013e-42
13	1175000	9	1235000	40	1.15706e-45	4.05609e-42
4	1175000	7	25000	27	2.02941e-45	7.07764e-42
13	1175000	6	475000	43	4.9887e-45	1.72655e-41
6	1235000	6	1265000	442	8.02774e-45	2.76426e-41
7	515000	7	565000	95	1.19487e-44	4.07827e-41
8	45000	8	85000	179	2.5504e-44	8.6291e-41
12	1725000	12	2245000	45	3.59738e-44	1.21413e-40
12	2215000	12	2245000	98	3.88106e-44	1.30663e-40
7	515000	7	605000	77	5.06233e-44	1.70222e-40
13	1175000	8	295000	38	6.63292e-44	2.21633e-40
1	615000	4	35000	27	6.79935e-44	2.26668e-40
10	945000	12	1265000	43	1.44275e-43	4.79203e-40
13	505000	13	535000	307	1.73518e-43	5.75632e-40
10	1645000	12	2245000	27	2.05592e-43	6.79547e-40
11	35000	11	2035000	33	2.47911e-43	8.1843e-40
3	595000	6	475000	37	2.7043e-43	8.9061e-40
13	35000	13	75000	62	2.83192e-43	9.31514e-40
12	2245000	4	1175000	29	3.50264e-43	1.14935e-39
4	55000	6	1365000	32	4.99567e-43	1.63336e-39
10	35000	12	2245000	28	5.04184e-43	1.64648e-39
10	35000	7	25000	25	7.24132e-43	2.35909e-39
8	15000	8	45000	90	8.452e-43	2.74693e-39
11	835000	13	1175000	35	9.27456e-43	3.01066e-39
4	55000	8	45000	35	9.63891e-43	3.12521e-39
11	35000	4	55000	34	1.05212e-42	3.4072e-39
11	35000	7	25000	28	1.43352e-42	4.62583e-39
12	1285000	3	595000	32	1.53938e-42	4.95566e-39
3	755000	3	795000	330	4.14159e-42	1.32078e-38
5	195000	5	225000	292	6.32762e-42	2.0132e-38
14	325000	14	355000	324	1.01457e-41	3.2092e-38
13	1745000	13	1775000	359	1.10853e-41	3.50233e-38
5	1065000	5	1105000	177	1.1434e-41	3.60833e-38
1	615000	8	25000	29	1.21275e-41	3.82274e-38
4	985000	4	1165000	67	1.73914e-41	5.47562e-38
11	35000	9	25000	29	2.02539e-41	6.36214e-38
11	835000	7	815000	33	2.28378e-41	7.16554e-38
4	55000	7	25000	27	2.83462e-41	8.83272e-38
6	5000	8	25000	31	3.89091e-41	1.20688e-37
12	2245000	2	25000	27	3.91715e-41	1.21364e-37
2	445000	8	295000	33	5.27909e-41	1.62634e-37
14	2135000	14	2195000	217	6.75334e-41	2.07347e-37
3	35000	9	1505000	23	7.38309e-41	2.26427e-37
4	1125000	4	1155000	124	7.89176e-41	2.41754e-37
11	35000	8	1445000	27	8.87586e-41	2.71595e-37
4	965000	7	555000	31	9.78323e-41	2.98353e-37
7	1105000	7	1135000	261	1.2778e-40	3.88812e-37
4	545000	4	615000	132	1.29326e-40	3.93077e-37
11	825000	14	1055000	44	1.40607e-40	4.2641e-37
10	35000	6	1365000	27	2.3672e-40	7.15492e-37
10	945000	9	1235000	35	2.47438e-40	7.4706e-37
1	615000	3	1035000	27	2.51982e-40	7.59934e-37
11	835000	12	1285000	29	2.77653e-40	8.3458e-37
11	1875000	11	1955000	204	3.17942e-40	9.53572e-37
4	975000	4	1125000	70	3.55566e-40	1.06407e-36
13	1175000	14	1065000	32	4.68787e-40	1.39982e-36
10	945000	7	815000	37	5.04816e-40	1.50574e-36
10	1645000	11	25000	25	5.26519e-40	1.56704e-36
12	1265000	5	445000	45	5.90534e-40	1.75373e-36
10	945000	7	805000	33	7.87445e-40	2.32581e-36
10	35000	11	25000	26	8.95637e-40	2.63393e-36
1	615000	8	35000	28	1.10612e-39	3.2459e-36
11	1875000	11	1965000	189	1.27781e-39	3.74568e-36
2	25000	2	65000	84	1.32793e-39	3.88841e-36
12	15000	12	2245000	26	1.45118e-39	4.24018e-36
6	475000	7	795000	42	1.45247e-39	4.24018e-36
11	2035000	12	15000	23	1.47703e-39	4.30647e-36
6	1125000	6	1165000	293	1.56502e-39	4.55813e-36
14	3015000	14	3045000	293	1.67812e-39	4.8823e-36
5	445000	9	1235000	38	1.79197e-39	5.20797e-36
11	825000	8	295000	36	2.54149e-39	7.36269e-36
12	1295000	14	1085000	39	2.54444e-39	7.36339e-36
4	895000	4	925000	410	3.99688e-39	1.15054e-35
3	35000	3	1035000	30	9.06709e-39	2.60179e-35
12	1275000	7	815000	36	1.13931e-38	3.25892e-35
1	615000	8	45000	29	1.17768e-38	3.36161e-35
12	2245000	4	1165000	29	1.20773e-38	3.44378e-35
14	1795000	14	1825000	194	1.50977e-38	4.28704e-35
7	25000	7	545000	36	1.57395e-38	4.46464e-35
11	35000	11	2015000	30	1.76412e-38	4.98844e-35
3	1035000	8	45000	30	1.83523e-38	5.17876e-35
1	615000	6	5000	27	2.00188e-38	5.63733e-35
10	1615000	10	1645000	71	3.38205e-38	9.48464e-35
4	255000	4	315000	181	4.35648e-38	1.21672e-34
11	1995000	11	2025000	104	4.82999e-38	1.3462e-34
12	1725000	4	975000	27	5.5301e-38	1.53818e-34
7	25000	7	555000	41	7.01333e-38	1.94875e-34
11	825000	7	805000	34	7.06014e-38	1.95975e-34
1	455000	11	825000	29	8.65191e-38	2.39914e-34
11	35000	13	35000	26	9.1674e-38	2.5395e-34
13	2855000	13	2885000	63	9.84965e-38	2.72572e-34
12	775000	12	815000	145	1.11933e-37	3.08806e-34
14	1085000	9	1235000	35	1.73634e-37	4.75662e-34
3	35000	3	75000	107	2.00748e-37	5.48834e-34
11	825000	5	445000	42	2.02811e-37	5.53919e-34
13	35000	8	25000	25	2.20176e-37	6.0014e-34
13	1175000	7	795000	41	2.48685e-37	6.76491e-34
11	825000	14	1065000	31	4.21269e-37	1.1414e-33
10	35000	7	1425000	25	5.23972e-37	1.41544e-33
11	25000	7	1425000	26	6.15119e-37	1.65673e-33
10	945000	3	595000	32	6.29461e-37	1.69368e-33
4	975000	7	545000	27	7.49899e-37	2.01177e-33
4	55000	4	1185000	25	8.40486e-37	2.25035e-33
3	595000	7	815000	32	1.08794e-36	2.90148e-33
12	1285000	5	465000	30	1.30882e-36	3.46674e-33
3	605000	7	815000	30	1.50216e-36	3.97112e-33
4	965000	8	45000	27	1.83047e-36	4.82967e-33
12	2245000	7	1425000	26	2.09412e-36	5.49865e-33
14	1055000	5	445000	42	2.48682e-36	6.5172e-33
4	295000	4	325000	247	2.78765e-36	7.27753e-33
7	795000	9	1235000	36	3.48927e-36	9.09175e-33
5	1335000	6	5000	28	3.97847e-36	1.03269e-32
10	35000	10	65000	139	5.29171e-36	1.36704e-32
10	1645000	11	35000	25	5.69871e-36	1.47078e-32
14	2735000	14	2765000	158	5.76949e-36	1.48764e-32
12	1285000	6	475000	31	6.07287e-36	1.56438e-32
14	3015000	14	3055000	191	6.63506e-36	1.70703e-32
4	975000	7	555000	30	6.63289e-36	1.70703e-32
4	1175000	6	5000	26	7.43087e-36	1.90699e-32
14	2135000	14	2165000	287	7.69445e-36	1.97277e-32
4	1005000	4	1035000	410	7.882e-36	2.01895e-32
4	965000	7	565000	25	8.29138e-36	2.11982e-32
11	35000	8	45000	31	8.57605e-36	2.18849e-32
12	1705000	4	965000	23	9.55927e-36	2.4371e-32
12	35000	13	45000	26	1.13346e-35	2.88161e-32
11	1955000	11	1985000	270	1.27628e-35	3.23564e-32
12	1695000	12	2245000	41	1.53487e-35	3.88036e-32
6	475000	7	805000	31	1.61926e-35	4.08233e-32
12	35000	5	1335000	30	1.73233e-35	4.36336e-32
4	965000	4	1135000	43	1.95791e-35	4.92698e-32
10	935000	11	825000	29	2.0629e-35	5.18638e-32
12	1275000	13	1175000	35	2.27392e-35	5.70636e-32
12	1705000	7	535000	25	3.4218e-35	8.53184e-32
2	25000	8	35000	25	3.73976e-35	9.29907e-32
4	975000	7	535000	26	4.43951e-35	1.10189e-31
2	25000	2	915000	23	4.65033e-35	1.15106e-31
11	825000	5	465000	35	5.39876e-35	1.32906e-31
13	1175000	3	595000	32	5.60376e-35	1.37828e-31
1	35000	1	95000	78	6.16555e-35	1.51235e-31
10	935000	7	815000	27	6.91464e-35	1.69457e-31
11	825000	14	1085000	38	8.38762e-35	2.05001e-31
6	5000	8	45000	29	8.4904e-35	2.07327e-31
11	25000	6	1385000	21	1.09961e-34	2.67794e-31
5	345000	5	375000	266	1.10665e-34	2.69267e-31
7	25000	7	1425000	25	1.32163e-34	3.21287e-31
12	55000	12	2245000	30	1.38682e-34	3.36835e-31
4	1125000	4	1175000	103	1.392e-34	3.37488e-31
2	315000	2	345000	323	1.4606e-34	3.53492e-31
14	1085000	5	445000	39	1.56356e-34	3.78071e-31
4	1165000	6	1365000	27	1.66418e-34	4.01689e-31
10	945000	7	795000	37	1.69575e-34	4.08945e-31
14	1065000	9	1235000	26	2.29805e-34	5.52725e-31
9	245000	9	275000	186	2.34509e-34	5.63542e-31
4	55000	4	125000	92	2.81788e-34	6.75962e-31
7	505000	7	535000	167	3.42621e-34	8.19002e-31
11	35000	8	25000	28	3.87545e-34	9.25576e-31
14	2495000	14	2535000	194	3.92489e-34	9.3656e-31
11	835000	6	475000	29	4.4704e-34	1.06393e-30
7	565000	7	605000	132	4.59195e-34	1.0919e-30
5	175000	5	205000	295	4.95505e-34	1.17516e-30
1	35000	8	45000	27	6.24189e-34	1.47906e-30
4	85000	4	1165000	27	6.77089e-34	1.60023e-30
2	455000	8	295000	27	8.62768e-34	2.03553e-30
12	485000	12	515000	274	9.57865e-34	2.25208e-30
12	2245000	13	35000	22	1.01215e-33	2.37766e-30
1	35000	6	1375000	22	1.06078e-33	2.4876e-30
13	1175000	2	445000	32	1.09089e-33	2.55601e-30
4	975000	8	45000	27	1.27629e-33	2.98271e-30
2	305000	2	335000	259	1.28251e-33	2.99467e-30
12	1295000	5	465000	32	1.32162e-33	3.08333e-30
10	35000	10	1625000	25	1.47819e-33	3.44271e-30
10	1605000	10	1645000	65	1.56218e-33	3.6352e-30
2	25000	8	25000	24	1.57069e-33	3.65189e-30
5	445000	7	815000	36	2.00425e-33	4.64405e-30
11	825000	7	785000	40	2.11179e-33	4.88491e-30
1	465000	7	815000	30	2.33622e-33	5.39945e-30
13	35000	6	1375000	20	2.92904e-33	6.75239e-30
8	295000	9	1235000	28	2.9888e-33	6.88431e-30
12	1285000	9	1235000	27	3.00086e-33	6.90624e-30
10	945000	12	1275000	32	3.23065e-33	7.42252e-30
1	35000	4	35000	22	5.13077e-33	1.17583e-29
13	45000	13	85000	69	5.23115e-33	1.19581e-29
11	825000	6	485000	30	5.23872e-33	1.19654e-29
12	1265000	9	1255000	35	5.57113e-33	1.27033e-29
12	1275000	9	1235000	30	6.07873e-33	1.38375e-29
3	35000	3	1045000	20	6.72589e-33	1.52979e-29
4	1165000	8	35000	27	6.94915e-33	1.57793e-29
1	35000	3	45000	21	7.31001e-33	1.65849e-29
11	35000	8	1435000	24	8.03008e-33	1.81882e-29
12	745000	12	775000	158	8.20527e-33	1.85696e-29
5	445000	7	795000	40	8.43748e-33	1.90792e-29
3	595000	8	295000	27	1.18681e-32	2.67036e-29
1	35000	4	1175000	23	1.27384e-32	2.86144e-29
11	825000	13	1165000	22	1.30739e-32	2.93438e-29
11	1335000	11	1365000	240	1.56212e-32	3.50032e-29
10	945000	12	1295000	32	1.66587e-32	3.72667e-29
13	1175000	14	1085000	35	1.80632e-32	4.03424e-29
11	25000	4	1165000	25	1.81198e-32	4.04098e-29
5	455000	7	815000	23	1.81083e-32	4.04098e-29
13	35000	13	85000	60	2.49518e-32	5.55448e-29
12	1295000	9	1235000	30	2.85234e-32	6.33919e-29
10	1385000	10	1425000	155	2.92412e-32	6.49341e-29
10	1405000	10	1435000	100	2.98956e-32	6.6333e-29
10	35000	11	35000	24	3.72611e-32	8.26085e-29
4	1175000	8	25000	24	4.46316e-32	9.87077e-29
11	25000	12	2245000	23	5.43693e-32	1.19563e-28
7	1425000	9	25000	22	5.57946e-32	1.22598e-28
1	615000	3	35000	21	5.59353e-32	1.22808e-28
6	1365000	7	555000	28	5.94962e-32	1.30521e-28
12	1265000	13	1175000	36	6.04055e-32	1.32409e-28
10	25000	10	1645000	21	6.31843e-32	1.38277e-28
7	1245000	7	1275000	365	6.41729e-32	1.40328e-28
1	35000	3	1035000	23	7.4518e-32	1.62298e-28
8	1415000	8	1445000	70	8.65968e-32	1.88303e-28
4	965000	7	585000	21	1.27345e-31	2.75589e-28
1	35000	8	25000	24	1.34099e-31	2.89973e-28
13	1715000	13	1745000	217	1.45705e-31	3.1432e-28
4	965000	4	1125000	53	1.5064e-31	3.24453e-28
9	145000	9	175000	167	1.59605e-31	3.43488e-28
3	35000	4	35000	20	1.78442e-31	3.83422e-28
5	1075000	5	1105000	146	1.89715e-31	4.07323e-28
1	615000	11	35000	24	1.94831e-31	4.17976e-28
10	1645000	6	1365000	21	2.96183e-31	6.32915e-28
11	25000	7	25000	20	3.32518e-31	7.09444e-28
7	25000	7	535000	31	3.56822e-31	7.5951e-28
12	1285000	6	485000	24	3.6613e-31	7.78714e-28
11	835000	9	1235000	25	4.26551e-31	9.05806e-28
4	45000	4	75000	65	4.41615e-31	9.37063e-28
11	25000	11	2015000	23	4.67573e-31	9.90598e-28
12	1275000	3	595000	28	5.10717e-31	1.08032e-27
12	1365000	12	1395000	428	5.45658e-31	1.15244e-27
3	595000	5	445000	31	6.00091e-31	1.26348e-27
13	1165000	7	815000	20	6.19424e-31	1.30217e-27
2	295000	2	325000	248	6.37776e-31	1.33971e-27
11	25000	4	55000	24	6.56321e-31	1.37548e-27
4	35000	8	25000	22	7.10264e-31	1.48739e-27
4	1035000	4	1105000	155	7.33626e-31	1.53395e-27
4	545000	4	605000	87	7.70423e-31	1.60718e-27
11	35000	12	35000	28	8.1027e-31	1.68901e-27
4	565000	4	605000	62	8.15365e-31	1.69833e-27
8	1175000	8	1205000	212	9.39673e-31	1.95277e-27
12	1275000	7	795000	34	9.69618e-31	2.01346e-27
1	35000	9	1495000	19	1.08554e-30	2.24903e-27
4	965000	7	535000	22	1.10091e-30	2.27914e-27
4	255000	4	285000	267	1.14183e-30	2.35488e-27
11	2025000	6	5000	24	1.35209e-30	2.78009e-27
7	805000	8	295000	25	1.4026e-30	2.87959e-27
1	35000	11	25000	22	1.47344e-30	3.02048e-27
4	565000	4	615000	76	1.48473e-30	3.04132e-27
11	855000	7	785000	39	1.49697e-30	3.06408e-27
5	335000	5	375000	191	1.53928e-30	3.14833e-27
12	2245000	9	25000	21	1.73755e-30	3.54852e-27
7	25000	7	85000	72	1.77483e-30	3.62193e-27
11	1855000	11	1965000	148	1.87986e-30	3.83052e-27
13	105000	13	2815000	42	1.88264e-30	3.83332e-27
10	1645000	3	35000	19	1.89333e-30	3.85218e-27
12	1295000	5	445000	34	1.89572e-30	3.85418e-27
11	2025000	12	35000	26	1.90078e-30	3.86157e-27
8	415000	8	465000	204	1.94094e-30	3.94022e-27
13	35000	6	5000	21	2.24904e-30	4.56229e-27
7	1385000	7	1425000	86	2.41981e-30	4.89409e-27
4	55000	4	105000	117	2.47715e-30	5.00635e-27
4	1165000	7	545000	25	2.55257e-30	5.15112e-27
13	35000	9	25000	19	2.61339e-30	5.26604e-27
11	35000	6	1375000	22	2.65435e-30	5.34424e-27
11	835000	8	295000	24	2.65417e-30	5.34424e-27
4	35000	8	45000	23	2.81634e-30	5.66241e-27
7	585000	8	45000	24	3.193e-30	6.41495e-27
14	1065000	3	595000	23	3.39509e-30	6.8109e-27
12	1695000	4	975000	24	3.46611e-30	6.94825e-27
11	855000	14	1055000	37	3.52088e-30	7.05285e-27
11	825000	14	1075000	26	4.03917e-30	8.07917e-27
7	505000	7	585000	76	4.14847e-30	8.29168e-27
12	1265000	2	445000	31	4.61004e-30	9.20749e-27
11	825000	6	495000	35	5.18105e-30	1.03403e-26
13	1175000	9	1245000	23	5.24901e-30	1.04683e-26
4	55000	8	25000	25	5.43496e-30	1.08267e-26
13	45000	7	25000	18	5.81793e-30	1.15774e-26
10	1645000	2	25000	19	5.85443e-30	1.16416e-26
12	1285000	2	445000	25	5.96738e-30	1.18575e-26
12	2245000	6	5000	23	6.34664e-30	1.25835e-26
4	935000	4	1165000	58	6.52348e-30	1.29248e-26
3	595000	6	485000	24	7.90527e-30	1.56056e-26
12	1725000	4	935000	25	7.98575e-30	1.5753e-26
10	945000	2	445000	28	8.16578e-30	1.60965e-26
2	25000	2	55000	64	8.78153e-30	1.72977e-26
7	795000	9	1225000	31	1.10905e-29	2.18301e-26
14	655000	14	685000	299	1.13683e-29	2.23607e-26
4	965000	4	995000	106	1.16108e-29	2.28213e-26
13	185000	13	215000	228	1.17364e-29	2.30515e-26
1	615000	9	1495000	18	1.19535e-29	2.3461e-26
3	1035000	8	25000	23	1.25978e-29	2.46899e-26
11	2025000	9	25000	21	1.30413e-29	2.55405e-26
4	55000	4	985000	30	1.44784e-29	2.83143e-26
11	35000	7	1425000	24	1.47325e-29	2.87905e-26
5	465000	9	1235000	27	1.76875e-29	3.45157e-26
14	1375000	14	1425000	198	2.21863e-29	4.31708e-26
4	415000	4	445000	270	2.30458e-29	4.48113e-26
13	35000	4	55000	21	2.40136e-29	4.66598e-26
13	1175000	2	465000	31	2.58632e-29	5.0182e-26
13	45000	8	45000	22	3.07807e-29	5.96382e-26
3	595000	6	495000	29	3.127e-29	6.05e-26
2	455000	6	485000	23	3.30117e-29	6.38244e-26
12	2245000	6	1365000	22	3.53667e-29	6.82805e-26
11	1845000	11	1955000	122	3.57239e-29	6.89212e-26
11	35000	11	2025000	27	3.75233e-29	7.23414e-26
7	795000	8	295000	30	3.87794e-29	7.47102e-26
13	45000	13	75000	55	3.99297e-29	7.68719e-26
14	1075000	3	595000	22	4.16227e-29	8.00745e-26
4	55000	6	1375000	21	4.9241e-29	9.46637e-26
11	825000	9	1245000	23	5.18001e-29	9.93729e-26
10	945000	14	1065000	24	5.38334e-29	1.03128e-25
13	1175000	2	455000	27	5.68454e-29	1.08821e-25
6	1365000	8	25000	23	5.80722e-29	1.11092e-25
13	2895000	8	1445000	16	5.85424e-29	1.11913e-25
12	2245000	7	25000	19	6.49724e-29	1.23943e-25
4	965000	6	5000	21	6.55642e-29	1.24984e-25
5	465000	6	475000	29	6.76946e-29	1.28955e-25
11	2025000	12	2245000	22	6.87438e-29	1.30862e-25
13	1175000	8	285000	26	7.00797e-29	1.33312e-25
12	1265000	14	1085000	34	8.60841e-29	1.63187e-25
12	1295000	7	795000	33	9.30822e-29	1.7633e-25
11	825000	9	1255000	31	9.69056e-29	1.83445e-25
12	25000	12	2245000	18	1.15325e-28	2.17556e-25
12	1285000	14	1075000	21	1.30451e-28	2.45751e-25
8	165000	8	195000	215	1.35156e-28	2.54437e-25
11	2025000	7	1425000	22	1.43374e-28	2.69536e-25
12	1455000	12	1485000	247	1.46395e-28	2.75025e-25
11	1885000	11	1965000	176	1.47722e-28	2.77325e-25
14	3255000	9	65000	13	1.47829e-28	2.77336e-25
12	1265000	7	795000	36	1.50118e-28	2.81435e-25
12	15000	13	35000	17	1.66406e-28	3.11242e-25
4	1175000	6	1375000	19	1.6636e-28	3.11242e-25
1	35000	9	1505000	18	1.72977e-28	3.22734e-25
10	25000	6	1365000	19	1.81386e-28	3.38191e-25
11	2035000	7	1425000	20	1.9628e-28	3.6521e-25
2	365000	2	395000	284	2.02447e-28	3.76427e-25
12	1295000	14	1055000	32	2.09802e-28	3.89836e-25
1	35000	12	2245000	21	2.1441e-28	3.98126e-25
1	615000	4	1175000	20	2.20668e-28	4.09466e-25
4	55000	8	35000	24	2.63294e-28	4.87566e-25
6	1365000	8	1435000	20	2.71822e-28	5.03013e-25
10	1645000	13	2895000	16	2.91888e-28	5.39414e-25
1	615000	4	25000	16	3.36027e-28	6.1972e-25
11	1835000	11	1965000	121	4.07578e-28	7.50153e-25
5	915000	5	945000	276	4.07936e-28	7.50303e-25
5	445000	7	805000	28	4.51619e-28	8.29527e-25
12	35000	7	1425000	24	4.63972e-28	8.51068e-25
11	45000	6	1375000	18	4.79853e-28	8.79606e-25
12	1285000	9	1245000	19	4.86855e-28	8.91407e-25
10	945000	14	1075000	23	4.93011e-28	9.01901e-25
4	975000	4	1135000	41	5.05995e-28	9.25031e-25
2	25000	7	1425000	20	5.08125e-28	9.28302e-25
12	1275000	6	475000	29	5.56213e-28	1.01411e-24
4	1165000	7	555000	27	5.7568e-28	1.0489e-24
12	2245000	13	25000	15	5.7929e-28	1.05407e-24
13	505000	13	545000	190	5.95107e-28	1.0814e-24
4	295000	4	345000	168	6.47891e-28	1.17496e-24
10	1395000	10	1425000	147	6.98355e-28	1.26563e-24
14	1075000	7	815000	23	7.31551e-28	1.32227e-24
12	1265000	6	495000	34	7.80217e-28	1.4093e-24
12	1725000	7	545000	22	7.95621e-28	1.43617e-24
11	825000	3	605000	26	8.07568e-28	1.45677e-24
11	35000	8	35000	24	8.58277e-28	1.54722e-24
11	825000	3	585000	26	9.95399e-28	1.79203e-24
14	695000	14	735000	179	1.09433e-27	1.96494e-24
10	945000	2	455000	25	1.17623e-27	2.10643e-24
11	1845000	11	1965000	113	1.35032e-27	2.41026e-24
4	35000	4	1155000	20	1.38009e-27	2.46017e-24
11	25000	11	2035000	21	1.38904e-27	2.47288e-24
14	1425000	14	1465000	297	1.39758e-27	2.48646e-24
4	1185000	8	25000	17	1.43118e-27	2.54457e-24
12	55000	12	775000	33	1.44991e-27	2.57619e-24
6	1335000	6	1375000	60	1.49828e-27	2.65694e-24
11	25000	4	1175000	20	1.65182e-27	2.91969e-24
2	455000	3	595000	23	1.68094e-27	2.96924e-24
1	615000	10	1645000	18	1.69829e-27	2.99794e-24
12	1295000	8	295000	26	1.74569e-27	3.07961e-24
13	25000	3	35000	14	1.74667e-27	3.07961e-24
10	945000	3	605000	24	1.76195e-27	3.10428e-24
4	25000	4	1175000	18	1.7717e-27	3.11944e-24
10	945000	11	835000	24	1.77587e-27	3.12475e-24
1	615000	9	1515000	13	1.94599e-27	3.41966e-24
10	35000	12	35000	22	2.05441e-27	3.60785e-24
2	335000	2	375000	278	2.28193e-27	4.00225e-24
4	1165000	8	45000	25	2.34504e-27	4.10764e-24
10	945000	5	445000	31	2.49082e-27	4.36019e-24
11	35000	13	2885000	18	2.60056e-27	4.54936e-24
2	445000	6	485000	23	2.65651e-27	4.64425e-24
2	295000	2	335000	273	2.73347e-27	4.77572e-24
12	2245000	8	45000	23	2.90625e-27	5.07433e-24
4	965000	7	545000	20	2.91114e-27	5.07961e-24
4	655000	5	445000	28	3.05104e-27	5.3169e-24
10	945000	11	855000	31	3.11153e-27	5.41883e-24
10	945000	5	465000	27	3.1698e-27	5.51679e-24
11	35000	2	875000	21	3.2692e-27	5.68615e-24
12	1735000	12	1765000	101	3.31581e-27	5.76353e-24
4	635000	7	815000	25	3.46233e-27	6.01437e-24
1	455000	12	1275000	21	3.49312e-27	6.06399e-24
4	1005000	4	1105000	130	4.02369e-27	6.98058e-24
14	1055000	4	665000	31	4.06174e-27	7.0421e-24
2	445000	5	445000	29	4.22771e-27	7.32053e-24
13	45000	13	95000	66	4.61161e-27	7.97005e-24
10	1365000	10	1405000	140	4.69207e-27	8.10396e-24
12	2245000	3	35000	19	4.79929e-27	8.27864e-24
12	1265000	4	665000	31	4.92523e-27	8.49048e-24
11	835000	12	1295000	24	5.29403e-27	9.11471e-24
11	35000	4	1165000	24	5.32565e-27	9.16334e-24
10	35000	3	35000	18	5.50598e-27	9.46165e-24
12	1295000	14	1065000	23	5.53115e-27	9.49891e-24
3	595000	9	1245000	19	5.64529e-27	9.68882e-24
10	945000	6	485000	24	5.76998e-27	9.89656e-24
11	825000	8	305000	20	6.04174e-27	1.03496e-23
2	465000	7	815000	28	6.27247e-27	1.07314e-23
11	855000	7	795000	35	6.52732e-27	1.11604e-23
6	495000	7	815000	30	7.03373e-27	1.20111e-23
5	335000	5	365000	212	7.32222e-27	1.24937e-23
14	1065000	8	295000	21	7.37801e-27	1.25753e-23
11	35000	13	45000	20	7.90693e-27	1.346e-23
1	35000	2	25000	19	8.01281e-27	1.36317e-23
4	1165000	8	25000	23	8.02233e-27	1.36394e-23
4	1165000	7	575000	19	8.12515e-27	1.37969e-23
12	1695000	12	1745000	101	9.00827e-27	1.52774e-23
8	45000	8	445000	36	9.05137e-27	1.5341e-23
11	2015000	13	35000	17	9.86997e-27	1.66972e-23
13	35000	13	2885000	16	9.93524e-27	1.67972e-23
4	655000	7	815000	25	1.03484e-26	1.7474e-23
1	575000	1	615000	56	1.05e-26	1.7719e-23
2	455000	9	1235000	23	1.07066e-26	1.80564e-23
3	75000	3	1035000	27	1.08475e-26	1.82827e-23
12	1725000	4	55000	22	1.11191e-26	1.87288e-23
4	55000	7	555000	26	1.1158e-26	1.87828e-23
10	945000	14	1085000	29	1.1427e-26	1.92237e-23
10	925000	11	825000	26	1.22275e-26	2.05448e-23
1	465000	5	445000	28	1.25256e-26	2.10329e-23
12	1265000	3	625000	34	1.25521e-26	2.10643e-23
14	1065000	7	795000	25	1.31085e-26	2.19438e-23
6	5000	6	1355000	23	1.39608e-26	2.33419e-23
2	25000	3	1035000	19	1.43871e-26	2.40398e-23
4	975000	7	565000	21	1.47822e-26	2.46848e-23
12	1295000	6	485000	24	1.71688e-26	2.85826e-23
12	1295000	2	445000	26	1.74019e-26	2.89529e-23
12	1285000	13	1175000	25	1.81058e-26	3.00872e-23
9	255000	9	295000	253	1.84228e-26	3.05953e-23
8	45000	8	435000	39	1.89262e-26	3.1393e-23
11	35000	5	1335000	23	1.9397e-26	3.21543e-23
4	975000	8	25000	21	2.05432e-26	3.40337e-23
6	1225000	6	1265000	232	2.1023e-26	3.48073e-23
14	1055000	9	1235000	28	2.31023e-26	3.81802e-23
12	1725000	4	965000	19	2.34035e-26	3.86545e-23
6	5000	7	1425000	21	2.41421e-26	3.98503e-23
11	1795000	11	1955000	118	2.49853e-26	4.12171e-23
12	35000	6	1365000	23	3.14185e-26	5.16105e-23
10	935000	8	295000	20	3.21055e-26	5.27072e-23
1	455000	8	295000	19	3.91185e-26	6.41044e-23
13	1175000	7	805000	25	3.96425e-26	6.4924e-23
11	1955000	13	2815000	41	3.98683e-26	6.52544e-23
6	1115000	6	1165000	128	4.07577e-26	6.66301e-23
11	35000	6	1365000	22	4.08831e-26	6.67948e-23
7	1425000	8	25000	21	4.62855e-26	7.55759e-23
11	35000	3	35000	20	5.02539e-26	8.20063e-23
11	1835000	11	1955000	123	5.42027e-26	8.82913e-23
5	1335000	7	1435000	14	5.96252e-26	9.69499e-23
12	1275000	5	465000	26	6.14885e-26	9.99199e-23
5	475000	9	1225000	26	6.18598e-26	1.00403e-22
12	1265000	3	595000	27	6.34375e-26	1.02841e-22
2	235000	2	265000	187	7.08256e-26	1.14409e-22
2	25000	4	1165000	20	7.20226e-26	1.16274e-22
1	35000	4	1165000	21	7.73815e-26	1.24777e-22
10	1645000	4	1165000	19	7.91972e-26	1.27629e-22
1	455000	6	485000	18	8.39164e-26	1.35154e-22
5	745000	5	775000	212	8.5818e-26	1.38136e-22
7	15000	7	1425000	15	9.34806e-26	1.5038e-22
13	1175000	9	1225000	26	9.36466e-26	1.50558e-22
13	45000	7	1425000	18	9.45578e-26	1.51934e-22
10	975000	10	1005000	256	1.03708e-25	1.66342e-22
4	1135000	8	45000	20	1.12196e-25	1.79744e-22
13	2885000	9	25000	15	1.14456e-25	1.83256e-22
10	935000	12	1285000	19	1.1545e-25	1.84739e-22
12	2245000	4	55000	21	1.25432e-25	2.00317e-22
14	1085000	7	795000	32	1.25406e-25	2.00317e-22
12	1695000	8	435000	21	1.26756e-25	2.02235e-22
11	825000	4	625000	28	1.32635e-25	2.11368e-22
14	1055000	3	625000	33	1.38891e-25	2.21207e-22
12	775000	12	915000	57	1.40611e-25	2.23685e-22
4	565000	4	595000	27	1.45776e-25	2.31766e-22
1	35000	3	35000	18	1.54254e-25	2.45101e-22
5	1335000	8	1435000	19	1.61612e-25	2.56644e-22
1	35000	8	1445000	17	1.61985e-25	2.57085e-22
3	1035000	4	35000	18	1.64699e-25	2.61241e-22
7	1205000	7	1275000	269	1.65127e-25	2.61767e-22
10	165000	10	195000	225	1.66392e-25	2.63618e-22
11	35000	4	1155000	19	1.75356e-25	2.77175e-22
12	1265000	7	775000	31	1.79111e-25	2.82945e-22
12	1705000	7	555000	22	1.83998e-25	2.90497e-22
12	1265000	7	785000	34	1.88869e-25	2.98014e-22
2	445000	7	795000	28	1.92564e-25	3.03668e-22
2	25000	4	1175000	18	1.95201e-25	3.07648e-22
2	445000	5	455000	18	1.96067e-25	3.08834e-22
10	35000	4	1175000	18	1.97996e-25	3.11692e-22
12	1295000	7	825000	22	2.02577e-25	3.18719e-22
14	2675000	14	2705000	178	2.06538e-25	3.24764e-22
7	25000	7	75000	40	2.06917e-25	3.25171e-22
10	1645000	6	1375000	16	2.16615e-25	3.40215e-22
1	565000	1	615000	62	2.48771e-25	3.8937e-22
11	25000	11	55000	52	2.53713e-25	3.96878e-22
12	2245000	8	1435000	18	2.54764e-25	3.98064e-22
2	455000	6	475000	24	2.691e-25	4.20222e-22
12	35000	12	775000	31	3.02537e-25	4.71895e-22
4	1155000	4	1185000	49	3.19059e-25	4.97096e-22
4	35000	4	1185000	16	3.67224e-25	5.70829e-22
2	25000	3	35000	17	3.6748e-25	5.70901e-22
8	45000	9	1495000	18	3.996e-25	6.20448e-22
14	2165000	14	2195000	256	4.22783e-25	6.55321e-22
10	1645000	6	5000	18	4.39542e-25	6.80522e-22
6	485000	8	295000	21	4.48614e-25	6.94172e-22
8	45000	8	1435000	23	4.82752e-25	7.45301e-22
12	1695000	7	585000	20	5.29006e-25	8.1486e-22
4	45000	4	1175000	19	5.44481e-25	8.38223e-22
1	25000	1	615000	18	5.55683e-25	8.54984e-22
4	1175000	8	45000	21	6.30506e-25	9.66283e-22
11	35000	13	2895000	17	6.3567e-25	9.73648e-22
7	785000	9	1235000	28	6.66079e-25	1.01851e-21
4	255000	4	305000	231	6.89206e-25	1.05328e-21
7	415000	7	445000	261	6.91265e-25	1.05583e-21
11	25000	13	35000	17	7.00675e-25	1.0696e-21
8	45000	9	1505000	18	7.07951e-25	1.0801e-21
1	465000	13	1175000	25	7.796e-25	1.18675e-21
8	25000	8	1445000	20	8.38803e-25	1.27403e-21
4	1175000	7	585000	18	8.40212e-25	1.27545e-21
11	35000	12	15000	18	8.71624e-25	1.3224e-21
12	1295000	6	475000	27	9.01358e-25	1.36675e-21
1	25000	3	35000	13	9.0391e-25	1.36985e-21
6	485000	9	1245000	17	9.20827e-25	1.39471e-21
13	35000	13	95000	56	9.50886e-25	1.43864e-21
13	2475000	13	2545000	121	9.86608e-25	1.49103e-21
12	1725000	7	555000	23	9.89897e-25	1.49517e-21
1	455000	6	475000	20	9.9204e-25	1.49757e-21
5	165000	5	195000	232	1.05854e-24	1.59707e-21
3	35000	3	65000	60	1.09807e-24	1.65397e-21
3	45000	3	1035000	20	1.11937e-24	1.68511e-21
3	45000	3	75000	90	1.34738e-24	2.02276e-21
10	1055000	10	1085000	234	1.39157e-24	2.08795e-21
13	1155000	6	475000	26	1.4138e-24	2.11897e-21
4	1145000	4	1175000	58	1.42005e-24	2.12716e-21
7	525000	7	555000	82	1.51418e-24	2.26691e-21
7	25000	7	595000	23	1.517e-24	2.26989e-21
7	815000	9	1245000	19	1.51994e-24	2.27304e-21
12	1705000	4	975000	18	1.60938e-24	2.40547e-21
10	1645000	4	965000	16	1.65112e-24	2.46515e-21
4	85000	4	1175000	19	1.67222e-24	2.49392e-21
4	1165000	9	1495000	17	1.74874e-24	2.60517e-21
6	1375000	8	1435000	16	1.7523e-24	2.60905e-21
3	35000	6	1375000	16	1.87511e-24	2.79038e-21
4	45000	4	85000	51	1.88345e-24	2.79973e-21
14	1055000	6	495000	31	1.90293e-24	2.82714e-21
1	615000	4	965000	17	1.94117e-24	2.88238e-21
7	25000	7	585000	23	1.96514e-24	2.91638e-21
4	45000	4	975000	20	2.09232e-24	3.10343e-21
6	485000	9	1235000	21	2.23513e-24	3.30984e-21
4	105000	4	165000	82	2.24913e-24	3.32876e-21
10	1645000	8	1445000	15	2.28376e-24	3.37817e-21
1	35000	4	55000	20	2.40508e-24	3.55376e-21
12	1695000	4	965000	19	2.4452e-24	3.61109e-21
10	1645000	7	25000	15	2.56793e-24	3.79029e-21
7	815000	8	285000	22	2.58364e-24	3.8114e-21
2	25000	4	55000	19	2.59595e-24	3.82748e-21
4	55000	7	545000	21	2.95285e-24	4.34898e-21
13	1735000	13	1775000	219	3.07945e-24	4.53054e-21
4	55000	4	1125000	27	3.18161e-24	4.67578e-21
8	35000	8	1435000	21	3.28835e-24	4.83004e-21
12	35000	4	55000	23	3.40261e-24	4.99516e-21
4	55000	6	5000	21	3.49726e-24	5.13135e-21
12	55000	3	1035000	21	3.73511e-24	5.46853e-21
14	1055000	7	795000	32	3.95865e-24	5.78958e-21
7	85000	7	535000	37	4.2087e-24	6.15198e-21
11	35000	12	55000	23	5.28424e-24	7.6993e-21
10	35000	13	45000	16	5.3712e-24	7.82181e-21
4	385000	4	415000	293	5.50043e-24	8.00572e-21
6	145000	6	175000	217	6.32669e-24	9.19848e-21
9	225000	9	255000	262	6.41619e-24	9.32362e-21
4	55000	6	1355000	19	6.49758e-24	9.43182e-21
12	55000	5	1335000	22	7.23602e-24	1.0487e-20
14	1735000	14	1815000	149	7.49591e-24	1.0852e-20
5	455000	6	485000	16	7.90568e-24	1.14392e-20
10	25000	11	25000	16	8.02652e-24	1.16079e-20
7	25000	7	515000	22	8.11254e-24	1.1726e-20
10	945000	9	1255000	25	8.15173e-24	1.17764e-20
10	1565000	10	1645000	51	8.42937e-24	1.2171e-20
14	1065000	8	285000	18	8.58835e-24	1.2394e-20
11	835000	5	465000	21	8.68149e-24	1.25218e-20
11	25000	11	75000	33	8.7761e-24	1.26515e-20
4	55000	7	1425000	20	8.81584e-24	1.27021e-20
1	615000	9	1485000	15	8.86933e-24	1.27724e-20
12	2025000	12	2055000	161	8.89734e-24	1.28059e-20
12	1725000	6	1365000	19	8.98771e-24	1.29292e-20
12	1725000	7	585000	18	9.25497e-24	1.33066e-20
3	1035000	4	1175000	18	9.52557e-24	1.36884e-20
1	455000	7	815000	19	9.64081e-24	1.38467e-20
11	605000	11	635000	189	1.04071e-23	1.49237e-20
4	55000	4	1145000	18	1.06283e-23	1.52248e-20
7	805000	9	1235000	21	1.06774e-23	1.52871e-20
3	895000	3	925000	205	1.08102e-23	1.54691e-20
7	555000	8	45000	25	1.15417e-23	1.65072e-20
4	245000	4	295000	158	1.18226e-23	1.68912e-20
11	25000	3	45000	16	1.20835e-23	1.72549e-20
14	655000	14	735000	138	1.32325e-23	1.88758e-20
3	45000	8	45000	18	1.34594e-23	1.91893e-20
14	1985000	14	2015000	256	1.41724e-23	2.01743e-20
13	1175000	14	1055000	29	1.42067e-23	2.02125e-20
12	1285000	3	605000	19	1.58733e-23	2.25364e-20
6	15000	6	1355000	15	1.59514e-23	2.26355e-20
12	2245000	7	545000	19	1.61263e-23	2.28598e-20
13	1155000	8	285000	21	1.72831e-23	2.44614e-20
11	1855000	11	1955000	141	1.73696e-23	2.4571e-20
6	475000	9	1235000	24	1.78432e-23	2.51986e-20
4	635000	9	1235000	21	1.80861e-23	2.5505e-20
12	2245000	8	1445000	16	1.81948e-23	2.56451e-20
11	25000	2	25000	17	1.82751e-23	2.57449e-20
7	155000	7	185000	244	1.87446e-23	2.63925e-20
4	975000	7	25000	16	1.88931e-23	2.65742e-20
13	1155000	14	1055000	27	1.9223e-23	2.70243e-20
3	625000	7	815000	28	2.10774e-23	2.96006e-20
14	1055000	3	595000	25	2.141e-23	3.00522e-20
4	55000	4	135000	84	2.18929e-23	3.07141e-20
10	35000	13	2885000	14	2.28466e-23	3.20191e-20
11	825000	9	1225000	25	2.28637e-23	3.20266e-20
1	35000	10	35000	17	2.38887e-23	3.34451e-20
10	1645000	4	1175000	16	2.56149e-23	3.5825e-20
12	2255000	7	25000	12	2.61109e-23	3.64812e-20
13	35000	4	1175000	16	2.62434e-23	3.66475e-20
10	1645000	9	1505000	14	2.66888e-23	3.72504e-20
11	855000	5	475000	29	2.78486e-23	3.87896e-20
12	15000	2	25000	15	2.8897e-23	4.02292e-20
12	35000	5	1325000	20	2.89177e-23	4.02374e-20
3	75000	3	125000	98	2.99789e-23	4.16927e-20
12	355000	12	385000	182	3.36239e-23	4.66903e-20
12	2245000	8	25000	19	3.38624e-23	4.69975e-20
12	1265000	7	835000	28	3.40227e-23	4.71959e-20
9	815000	9	855000	213	3.41628e-23	4.73419e-20
10	1645000	10	1675000	42	3.61074e-23	4.99858e-20
12	2245000	3	1035000	18	3.85542e-23	5.32918e-20
4	1165000	7	25000	17	3.85815e-23	5.33024e-20
14	695000	14	725000	204	3.88836e-23	5.36925e-20
4	1155000	8	25000	17	4.01079e-23	5.52708e-20
4	1175000	9	1505000	15	4.0334e-23	5.55543e-20
11	2035000	12	35000	19	4.18658e-23	5.76349e-20
1	95000	4	55000	19	4.32964e-23	5.95743e-20
12	1735000	7	535000	17	4.33906e-23	5.96737e-20
13	1725000	13	1775000	144	4.68209e-23	6.42937e-20
6	495000	9	1235000	25	4.99195e-23	6.84105e-20
10	25000	7	25000	14	5.17337e-23	7.08254e-20
3	615000	7	785000	25	5.27464e-23	7.21755e-20
12	1275000	14	1085000	26	5.59595e-23	7.64952e-20
12	1265000	3	605000	23	6.00029e-23	8.194e-20
6	1135000	6	1235000	153	6.0196e-23	8.21625e-20
10	35000	2	25000	16	6.1285e-23	8.35651e-20
12	1275000	14	1055000	27	6.20325e-23	8.4542e-20
11	45000	6	1365000	17	6.74081e-23	9.17303e-20
11	815000	14	1055000	28	7.03995e-23	9.57531e-20
6	1335000	6	1385000	42	7.3838e-23	1.0033e-19
6	485000	7	805000	19	7.45585e-23	1.01258e-19
12	1725000	12	2195000	27	7.9425e-23	1.07813e-19
10	335000	10	365000	174	8.91792e-23	1.20813e-19
14	1065000	5	445000	22	9.90504e-23	1.33919e-19
7	215000	7	245000	148	1.04627e-22	1.41318e-19
3	625000	7	765000	28	1.05285e-22	1.42136e-19
12	35000	8	45000	23	1.11756e-22	1.50723e-19
4	1165000	7	535000	20	1.18805e-22	1.60071e-19
12	2205000	12	2245000	40	1.20766e-22	1.62471e-19
10	935000	13	1175000	20	1.22143e-22	1.64242e-19
11	1995000	11	2035000	57	1.27223e-22	1.70989e-19
5	1255000	5	1285000	148	1.27664e-22	1.71497e-19
4	1165000	6	5000	20	1.28086e-22	1.71979e-19
12	1405000	12	1435000	275	1.36391e-22	1.8295e-19
12	2245000	7	15000	12	1.37445e-22	1.84181e-19
9	915000	9	945000	221	1.43663e-22	1.9223e-19
1	475000	3	625000	23	1.45879e-22	1.951e-19
12	1275000	5	445000	27	1.46521e-22	1.95861e-19
11	35000	4	965000	18	1.47885e-22	1.97588e-19
14	1085000	5	465000	25	1.56036e-22	2.08273e-19
12	1735000	4	975000	16	1.57151e-22	2.09659e-19
12	1395000	12	1425000	314	1.5844e-22	2.11275e-19
5	25000	5	1335000	17	1.72332e-22	2.29575e-19
12	2245000	13	45000	16	1.73473e-22	2.30981e-19
3	335000	3	365000	225	1.81696e-22	2.41694e-19
1	615000	2	25000	16	1.85265e-22	2.46321e-19
1	465000	7	795000	25	1.9087e-22	2.53649e-19
12	1675000	12	1735000	74	1.93491e-22	2.57006e-19
11	45000	13	45000	15	2.05132e-22	2.72204e-19
13	1175000	2	435000	21	2.13217e-22	2.82518e-19
6	5000	6	1375000	19	2.22154e-22	2.93931e-19
4	1135000	4	1175000	65	2.2612e-22	2.99032e-19
12	1695000	7	555000	23	2.43535e-22	3.21593e-19
12	15000	5	1335000	16	2.53097e-22	3.34059e-19
13	35000	6	1365000	16	2.61382e-22	3.44492e-19
10	35000	9	1495000	14	2.62721e-22	3.4609e-19
6	5000	7	25000	16	2.68286e-22	3.53249e-19
4	1005000	4	1095000	140	2.70935e-22	3.56564e-19
11	35000	6	5000	20	2.86728e-22	3.77166e-19
11	25000	6	5000	18	2.98415e-22	3.9235e-19
8	875000	8	905000	256	3.0408e-22	3.99412e-19
2	315000	2	375000	187	3.11883e-22	4.09463e-19
10	1605000	13	35000	14	3.13213e-22	4.11012e-19
11	825000	8	285000	22	3.28268e-22	4.30352e-19
12	55000	12	85000	136	3.31953e-22	4.34974e-19
1	465000	10	945000	22	3.36539e-22	4.40771e-19
4	55000	8	1405000	19	3.37135e-22	4.41338e-19
13	2435000	13	2475000	220	3.38145e-22	4.42447e-19
8	45000	8	75000	108	3.46631e-22	4.53333e-19
13	1175000	14	1075000	20	3.49203e-22	4.56477e-19
10	1625000	6	1365000	17	3.53707e-22	4.61921e-19
10	945000	6	495000	26	3.55306e-22	4.6373e-19
5	175000	5	215000	155	3.55263e-22	4.6373e-19
14	1425000	14	1495000	159	3.57049e-22	4.65615e-19
11	835000	14	1065000	17	3.58486e-22	4.67265e-19
11	25000	3	35000	16	3.60359e-22	4.69481e-19
12	1265000	13	1155000	26	3.65732e-22	4.76253e-19
6	1375000	7	25000	14	3.66963e-22	4.77628e-19
4	1175000	8	35000	18	3.7905e-22	4.92653e-19
4	55000	4	115000	76	3.80999e-22	4.94949e-19
1	35000	1	595000	21	3.84153e-22	4.98523e-19
8	1405000	8	1445000	63	3.87682e-22	5.02671e-19
11	35000	3	1035000	19	3.89197e-22	5.04154e-19
14	1065000	6	475000	20	3.95688e-22	5.12319e-19
6	1355000	6	1385000	60	3.98462e-22	5.15664e-19
4	975000	4	1185000	25	4.20296e-22	5.42888e-19
12	1295000	7	785000	28	4.30173e-22	5.55382e-19
4	265000	4	305000	210	4.4698e-22	5.7626e-19
11	25000	9	25000	16	4.60464e-22	5.92802e-19
7	35000	8	45000	16	4.75016e-22	6.11247e-19
14	3015000	14	3105000	137	4.77647e-22	6.14342e-19
3	35000	8	35000	17	4.7875e-22	6.15469e-19
5	1335000	9	25000	17	4.79665e-22	6.16355e-19
12	2245000	13	2885000	14	4.85261e-22	6.2325e-19
2	465000	3	595000	22	4.87286e-22	6.25556e-19
12	2245000	4	35000	16	4.95318e-22	6.35567e-19
4	635000	7	805000	19	4.96931e-22	6.37337e-19
9	425000	9	455000	305	5.21984e-22	6.68837e-19
1	435000	3	625000	29	5.83504e-22	7.4661e-19
12	1725000	7	515000	16	5.85942e-22	7.49377e-19
2	25000	6	5000	17	6.13367e-22	7.83348e-19
3	1045000	9	1515000	9	6.24514e-22	7.96834e-19
14	225000	14	255000	266	6.40256e-22	8.16537e-19
7	815000	8	305000	16	6.66546e-22	8.4927e-19
10	955000	13	1175000	23	7.25959e-22	9.23672e-19
5	855000	5	895000	204	7.2702e-22	9.24539e-19
11	845000	7	815000	20	8.18005e-22	1.03787e-18
1	465000	12	1265000	24	8.45458e-22	1.07221e-18
1	425000	14	1055000	26	8.64102e-22	1.09534e-18
10	945000	4	625000	23	8.65102e-22	1.0961e-18
5	475000	8	275000	26	8.96315e-22	1.13406e-18
11	45000	8	45000	18	9.03525e-22	1.14265e-18
4	1175000	7	35000	14	9.09381e-22	1.14899e-18
11	465000	11	505000	226	9.36864e-22	1.18316e-18
10	965000	10	1005000	223	9.79527e-22	1.23647e-18
14	255000	14	285000	171	9.82338e-22	1.23944e-18
5	1235000	5	1265000	170	9.97279e-22	1.25771e-18
10	945000	14	1055000	26	1.12054e-21	1.41054e-18
12	1705000	7	545000	17	1.13616e-21	1.42954e-18
7	1275000	7	1305000	332	1.14087e-21	1.43481e-18
12	15000	9	25000	14	1.14761e-21	1.44261e-18
12	2245000	4	965000	16	1.19123e-21	1.49675e-18
11	25000	8	45000	19	1.19973e-21	1.50674e-18
12	15000	7	1425000	15	1.26483e-21	1.5863e-18
12	1725000	12	2225000	22	1.27995e-21	1.60378e-18
12	1275000	2	445000	22	1.28951e-21	1.61428e-18
10	35000	8	1435000	15	1.34348e-21	1.68107e-18
13	1175000	8	275000	26	1.34463e-21	1.68173e-18
12	2245000	13	2895000	14	1.35282e-21	1.69049e-18
7	25000	8	1435000	14	1.38255e-21	1.72678e-18
4	965000	7	575000	14	1.45657e-21	1.81839e-18
3	625000	7	845000	28	1.52233e-21	1.89874e-18
1	465000	12	1285000	19	1.6663e-21	2.07736e-18
2	25000	8	45000	18	1.70533e-21	2.12505e-18
10	35000	8	45000	18	1.72946e-21	2.15412e-18
8	425000	8	455000	114	1.75527e-21	2.18527e-18
12	1285000	7	795000	23	1.7983e-21	2.23475e-18
11	2025000	13	2885000	14	1.86844e-21	2.32086e-18
2	435000	6	475000	20	1.87385e-21	2.32652e-18
4	55000	4	145000	80	1.87491e-21	2.32677e-18
11	45000	7	25000	14	2.03732e-21	2.52487e-18
12	15000	6	1365000	15	2.04444e-21	2.53253e-18
10	1645000	13	25000	11	2.07116e-21	2.56447e-18
4	35000	4	105000	59	2.16984e-21	2.68542e-18
10	1645000	8	45000	17	2.1815e-21	2.6974e-18
13	35000	8	45000	17	2.23788e-21	2.7646e-18
13	2475000	13	2505000	175	2.35331e-21	2.90193e-18
12	35000	4	1165000	21	2.36821e-21	2.91898e-18
3	615000	8	295000	19	2.42922e-21	2.99282e-18
11	35000	11	115000	59	2.69274e-21	3.31298e-18
8	45000	8	1445000	19	2.69488e-21	3.31412e-18
14	2495000	14	2525000	145	2.8798e-21	3.53673e-18
2	25000	8	1445000	14	3.01581e-21	3.70043e-18
4	25000	4	1165000	16	3.01994e-21	3.70382e-18
12	1425000	12	1455000	244	3.10103e-21	3.80157e-18
13	2895000	9	25000	13	3.1489e-21	3.85677e-18
12	775000	4	975000	17	3.41782e-21	4.17979e-18
11	835000	13	1165000	13	3.60948e-21	4.40897e-18
1	195000	1	245000	224	3.64257e-21	4.4474e-18
4	605000	4	965000	25	3.70787e-21	4.5251e-18
4	745000	4	775000	220	3.78512e-21	4.6173e-18
12	1265000	12	1295000	243	3.88623e-21	4.73639e-18
3	1045000	8	45000	14	3.9071e-21	4.75969e-18
2	475000	5	445000	26	3.91455e-21	4.76663e-18
13	75000	13	105000	80	4.16422e-21	5.06386e-18
11	1325000	11	1365000	127	4.22476e-21	5.13517e-18
8	1115000	8	1145000	235	4.33532e-21	5.26721e-18
2	645000	2	695000	167	4.35505e-21	5.28881e-18
9	255000	9	315000	156	4.40221e-21	5.34132e-18
13	35000	4	975000	15	4.66342e-21	5.65573e-18
10	945000	8	295000	21	4.79583e-21	5.81372e-18
14	2735000	14	2775000	143	4.86613e-21	5.89631e-18
7	25000	8	1445000	13	4.88166e-21	5.9125e-18
9	1175000	9	1205000	169	4.90054e-21	5.93273e-18
4	965000	7	605000	17	5.10004e-21	6.16601e-18
12	2245000	7	555000	20	5.16111e-21	6.23707e-18
12	1285000	7	805000	18	5.50867e-21	6.64234e-18
14	1055000	8	275000	27	5.59075e-21	6.73236e-18
7	85000	7	585000	29	5.63591e-21	6.78373e-18
14	685000	14	735000	167	5.64214e-21	6.78823e-18
12	1395000	12	1455000	191	5.95469e-21	7.1611e-18
1	35000	1	105000	59	5.98811e-21	7.19811e-18
13	2885000	7	25000	12	6.05734e-21	7.27812e-18
6	1365000	6	1395000	45	6.08869e-21	7.31256e-18
11	2035000	13	35000	14	6.38087e-21	7.66008e-18
11	25000	12	2255000	12	6.54699e-21	7.85604e-18
4	85000	4	965000	17	7.05091e-21	8.45698e-18
11	1905000	11	1965000	176	7.14409e-21	8.56497e-18
10	945000	12	1285000	20	7.77928e-21	9.32238e-18
11	35000	7	555000	22	7.85297e-21	9.40655e-18
12	1445000	12	1475000	369	8.56205e-21	1.02424e-17
11	825000	12	1305000	22	9.06182e-21	1.08212e-17
10	35000	11	2025000	16	9.14125e-21	1.09112e-17
12	35000	12	2225000	17	9.49448e-21	1.1323e-17
11	35000	2	25000	17	9.50839e-21	1.13345e-17
11	855000	12	1295000	26	9.59131e-21	1.14284e-17
6	1365000	8	45000	19	9.82502e-21	1.17017e-17
12	35000	7	555000	23	9.91838e-21	1.18078e-17
3	605000	6	485000	17	9.9376e-21	1.18255e-17
14	1055000	6	475000	26	9.97974e-21	1.18704e-17
12	1295000	6	455000	24	1.00028e-20	1.18926e-17
11	35000	6	1335000	16	1.0084e-20	1.1984e-17
11	1245000	11	1285000	167	1.07821e-20	1.28053e-17
1	445000	7	815000	18	1.07798e-20	1.28053e-17
4	1115000	4	1165000	79	1.10247e-20	1.30848e-17
11	2035000	13	45000	14	1.11707e-20	1.32523e-17
11	35000	4	975000	18	1.12761e-20	1.33715e-17
12	125000	12	155000	151	1.14776e-20	1.35992e-17
3	625000	6	495000	28	1.22363e-20	1.44722e-17
13	1185000	5	445000	23	1.23108e-20	1.4554e-17
11	35000	6	1385000	15	1.24176e-20	1.46739e-17
10	1645000	12	2255000	11	1.24505e-20	1.47064e-17
10	35000	13	35000	14	1.25717e-20	1.48431e-17
3	45000	3	115000	65	1.29576e-20	1.52921e-17
2	445000	9	1235000	20	1.31548e-20	1.55181e-17
1	35000	6	5000	17	1.40182e-20	1.65151e-17
1	435000	7	795000	28	1.41619e-20	1.66772e-17
4	1165000	6	1375000	16	1.4192e-20	1.67054e-17
4	265000	4	315000	130	1.45446e-20	1.71131e-17
1	615000	4	1165000	17	1.54762e-20	1.82013e-17
11	275000	11	305000	278	1.57814e-20	1.85442e-17
6	1115000	6	1155000	87	1.62997e-20	1.9145e-17
12	1665000	12	1735000	71	1.68244e-20	1.97528e-17
7	785000	8	285000	22	1.75695e-20	2.06008e-17
12	775000	12	1695000	23	1.7846e-20	2.09161e-17
12	1715000	7	555000	16	1.81557e-20	2.12515e-17
13	35000	7	25000	13	1.82599e-20	2.13551e-17
10	1645000	13	2885000	12	1.83623e-20	2.14656e-17
1	465000	3	595000	19	1.84037e-20	2.15049e-17
12	1485000	12	1515000	183	1.87037e-20	2.18459e-17
11	825000	4	655000	22	1.94881e-20	2.27426e-17
11	2025000	12	55000	19	2.04391e-20	2.38422e-17
3	625000	7	795000	29	2.05764e-20	2.39921e-17
3	625000	9	1205000	24	2.07616e-20	2.41977e-17
11	2025000	12	25000	13	2.09823e-20	2.44445e-17
11	855000	9	1205000	24	2.12528e-20	2.47489e-17
1	35000	8	1435000	15	2.1427e-20	2.49412e-17
6	1365000	9	1505000	14	2.17205e-20	2.5272e-17
13	185000	13	225000	113	2.2637e-20	2.63158e-17
4	55000	4	1135000	19	2.27783e-20	2.64687e-17
11	45000	8	25000	16	2.34354e-20	2.72207e-17
7	815000	9	1225000	21	2.35687e-20	2.73638e-17
3	615000	7	815000	20	2.45348e-20	2.84733e-17
2	915000	6	1365000	13	2.63647e-20	3.05709e-17
8	285000	9	1235000	18	2.66015e-20	3.08323e-17
13	2885000	6	1375000	12	2.82863e-20	3.27572e-17
11	835000	12	1275000	19	2.87528e-20	3.32691e-17
12	1295000	2	465000	23	2.89292e-20	3.34589e-17
11	25000	5	25000	13	2.94136e-20	3.40047e-17
14	1055000	9	1225000	23	3.06328e-20	3.53841e-17
4	1065000	4	1095000	150	3.08643e-20	3.56213e-17
2	25000	9	1505000	13	3.13904e-20	3.62132e-17
10	35000	9	1505000	13	3.17158e-20	3.6573e-17
1	515000	4	615000	23	3.32459e-20	3.8305e-17
14	1065000	6	485000	16	3.3514e-20	3.85975e-17
4	565000	7	555000	16	3.43487e-20	3.95421e-17
10	945000	8	285000	19	3.47973e-20	4.00416e-17
3	605000	7	805000	17	3.53937e-20	4.06935e-17
11	825000	4	645000	16	3.54578e-20	4.07499e-17
14	2495000	14	2555000	81	3.55614e-20	4.08518e-17
10	35000	12	25000	12	3.56181e-20	4.08996e-17
4	105000	4	135000	157	3.56559e-20	4.09257e-17
12	1695000	8	45000	20	3.57179e-20	4.09795e-17
12	35000	7	25000	16	3.61312e-20	4.14363e-17
4	925000	4	1095000	80	3.79194e-20	4.34505e-17
11	825000	9	1215000	23	3.9973e-20	4.57265e-17
10	1285000	10	1325000	180	4.00323e-20	4.57751e-17
10	35000	5	1335000	16	4.04707e-20	4.62376e-17
12	1275000	13	1165000	14	4.08115e-20	4.66073e-17
11	825000	12	1265000	27	4.17793e-20	4.76926e-17
11	2035000	12	2245000	15	4.37947e-20	4.99512e-17
1	465000	6	475000	21	4.516e-20	5.14869e-17
4	645000	7	815000	15	4.67519e-20	5.32571e-17
4	45000	4	115000	44	4.69961e-20	5.35129e-17
14	655000	14	705000	168	4.79728e-20	5.45794e-17
1	565000	4	975000	15	4.97944e-20	5.66046e-17
14	2985000	14	3015000	165	5.3307e-20	6.05469e-17
12	1705000	7	515000	14	5.42645e-20	6.16087e-17
10	35000	4	35000	14	5.51803e-20	6.26224e-17
2	465000	9	1235000	21	5.53899e-20	6.2834e-17
6	295000	6	325000	161	5.69657e-20	6.45947e-17
12	1725000	7	535000	17	5.73304e-20	6.49812e-17
13	1825000	13	1865000	172	5.93903e-20	6.72598e-17
11	45000	12	35000	17	5.98845e-20	6.77913e-17
10	25000	12	2245000	14	6.04089e-20	6.83565e-17
2	865000	8	45000	17	6.33242e-20	7.1566e-17
10	945000	7	825000	18	6.4398e-20	7.27493e-17
11	1895000	11	1965000	99	6.46532e-20	7.30073e-17
10	945000	5	475000	23	6.53405e-20	7.37528e-17
14	1055000	8	315000	24	6.53587e-20	7.37528e-17
4	45000	4	965000	16	6.54815e-20	7.38507e-17
13	1175000	7	785000	27	6.58236e-20	7.42057e-17
4	115000	4	165000	70	6.60649e-20	7.44469e-17
2	445000	3	595000	19	6.64416e-20	7.48404e-17
14	2505000	14	2555000	105	6.681e-20	7.52243e-17
13	1165000	8	295000	13	6.93245e-20	7.79909e-17
3	1035000	7	25000	14	6.9912e-20	7.86193e-17
2	25000	2	895000	15	7.24297e-20	8.13497e-17
10	945000	9	1245000	16	7.28632e-20	8.18028e-17
11	705000	11	735000	221	7.31108e-20	8.20469e-17
1	35000	1	635000	13	8.08535e-20	9.06612e-17
14	665000	14	725000	112	8.11718e-20	9.09806e-17
11	845000	6	475000	19	8.12231e-20	9.10006e-17
10	35000	4	975000	15	8.31387e-20	9.31084e-17
11	825000	2	455000	21	8.37321e-20	9.37344e-17
5	175000	5	225000	158	8.39172e-20	9.39029e-17
4	1155000	8	45000	16	8.41697e-20	9.41468e-17
11	35000	4	35000	16	8.44146e-20	9.43819e-17
10	935000	3	595000	16	8.52431e-20	9.52691e-17
13	35000	5	1335000	15	8.61024e-20	9.61899e-17
13	2855000	6	1365000	14	8.76063e-20	9.78299e-17
10	25000	3	35000	13	8.86108e-20	9.88299e-17
4	925000	4	1005000	152	8.9006e-20	9.92299e-17
11	835000	7	795000	21	8.9405e-20	9.96339e-17
1	615000	2	925000	11	9.10577e-20	1.01434e-16
3	45000	4	55000	15	9.15986e-20	1.01995e-16
12	1265000	3	575000	26	9.39569e-20	1.04535e-16
7	35000	7	555000	24	9.82458e-20	1.09262e-16
11	35000	4	1175000	17	9.91728e-20	1.10203e-16
12	2035000	12	2065000	238	9.91924e-20	1.10203e-16
10	35000	9	25000	14	1.00038e-19	1.11028e-16
7	835000	8	265000	26	1.00319e-19	1.11295e-16
8	1115000	8	1195000	117	1.00584e-19	1.11543e-16
13	1175000	5	455000	16	1.00865e-19	1.1181e-16
1	475000	7	795000	21	1.01069e-19	1.1199e-16
12	35000	2	25000	17	1.08922e-19	1.20544e-16
1	595000	8	25000	14	1.108e-19	1.22573e-16
3	595000	7	785000	23	1.13871e-19	1.25919e-16
8	275000	9	1205000	22	1.17773e-19	1.30128e-16
10	25000	11	45000	13	1.20179e-19	1.32571e-16
10	205000	10	245000	239	1.30281e-19	1.43598e-16
14	1085000	6	475000	24	1.31665e-19	1.45065e-16
12	765000	12	795000	150	1.31915e-19	1.45282e-16
11	45000	11	75000	33	1.32477e-19	1.45841e-16
12	755000	12	785000	136	1.34876e-19	1.48422e-16
13	1145000	14	1085000	21	1.35182e-19	1.48699e-16
12	775000	12	805000	80	1.37352e-19	1.51025e-16
14	1055000	8	295000	22	1.38551e-19	1.52281e-16
1	535000	1	615000	65	1.39681e-19	1.53462e-16
8	295000	9	1205000	19	1.41658e-19	1.55571e-16
12	1265000	2	435000	20	1.42866e-19	1.56771e-16
1	505000	4	615000	22	1.43478e-19	1.57379e-16
11	2025000	8	1435000	15	1.449e-19	1.58875e-16
10	35000	12	15000	13	1.4687e-19	1.60906e-16
6	1375000	8	25000	15	1.47953e-19	1.62027e-16
4	965000	7	25000	13	1.48354e-19	1.624e-16
13	1165000	9	1225000	13	1.53177e-19	1.67612e-16
7	525000	7	575000	32	1.57681e-19	1.72333e-16
4	275000	4	315000	113	1.59255e-19	1.73913e-16
6	1365000	8	1445000	14	1.59725e-19	1.74286e-16
4	975000	6	1365000	16	1.62098e-19	1.76805e-16
1	35000	4	1155000	14	1.65954e-19	1.80938e-16
12	1285000	2	455000	17	1.67068e-19	1.8208e-16
12	1395000	12	1465000	133	1.69123e-19	1.84246e-16
12	2185000	12	2245000	33	1.69642e-19	1.84737e-16
14	1195000	14	1225000	153	1.74983e-19	1.90401e-16
10	945000	2	465000	22	1.78453e-19	1.93944e-16
6	475000	8	285000	19	1.80272e-19	1.95842e-16
3	1035000	4	1165000	17	1.80666e-19	1.96193e-16
12	1355000	12	1395000	246	1.81874e-19	1.97426e-16
11	35000	7	545000	18	1.82904e-19	1.98465e-16
8	145000	8	175000	255	1.9076e-19	2.06823e-16
12	1295000	13	1185000	20	1.92943e-19	2.09107e-16
14	1065000	7	835000	18	1.98126e-19	2.14639e-16
12	1265000	14	1055000	27	1.99699e-19	2.16257e-16
3	615000	9	1225000	18	2.00482e-19	2.17019e-16
4	1175000	7	545000	16	2.02199e-19	2.18616e-16
4	35000	4	85000	44	2.08076e-19	2.24791e-16
7	505000	7	555000	129	2.11051e-19	2.27914e-16
11	2035000	5	1345000	12	2.11648e-19	2.28469e-16
13	1425000	13	1465000	174	2.12122e-19	2.2889e-16
13	2895000	8	1435000	12	2.1325e-19	2.30015e-16
13	1005000	13	1035000	180	2.17282e-19	2.34271e-16
11	25000	6	1375000	14	2.18745e-19	2.35713e-16
3	585000	5	465000	18	2.18705e-19	2.35713e-16
7	515000	8	45000	16	2.21287e-19	2.38118e-16
13	2895000	6	1385000	11	2.25363e-19	2.42217e-16
6	1375000	9	1495000	12	2.29563e-19	2.46439e-16
1	615000	4	975000	15	2.33187e-19	2.50132e-16
5	915000	5	955000	157	2.36158e-19	2.53219e-16
2	25000	6	1365000	15	2.36837e-19	2.53847e-16
10	1645000	4	975000	14	2.3767e-19	2.54639e-16
11	2025000	8	1445000	14	2.44003e-19	2.61218e-16
7	595000	8	45000	17	2.45419e-19	2.62631e-16
4	665000	7	795000	25	2.52136e-19	2.69713e-16
1	615000	12	2245000	15	2.52798e-19	2.70315e-16
7	95000	7	505000	33	2.64221e-19	2.82418e-16
7	785000	8	255000	29	2.80878e-19	3.00104e-16
2	445000	7	805000	18	2.86011e-19	3.05469e-16
14	1055000	2	455000	21	2.94414e-19	3.1432e-16
4	565000	8	435000	13	3.06073e-19	3.26383e-16
3	5000	3	35000	22	3.07022e-19	3.27267e-16
12	1435000	12	1465000	214	3.13399e-19	3.33803e-16
10	1645000	8	1435000	13	3.22575e-19	3.43173e-16
8	45000	8	1415000	18	3.30287e-19	3.5124e-16
13	35000	4	1165000	15	3.41466e-19	3.62986e-16
12	1415000	12	1455000	214	3.4345e-19	3.64953e-16
6	475000	9	1255000	22	3.55162e-19	3.77251e-16
4	985000	8	45000	18	3.67035e-19	3.8971e-16
14	1055000	7	785000	28	3.69206e-19	3.91862e-16
14	655000	14	725000	140	3.73616e-19	3.96388e-16
8	1085000	8	1135000	155	3.93872e-19	4.17553e-16
4	55000	9	1505000	14	3.95673e-19	4.19299e-16
4	965000	7	595000	14	4.01853e-19	4.25516e-16
14	3075000	14	3105000	220	4.0491e-19	4.2842e-16
13	1185000	7	795000	22	4.09328e-19	4.32926e-16
13	35000	13	2855000	13	4.13463e-19	4.37129e-16
12	1265000	3	615000	21	4.16377e-19	4.40039e-16
12	2245000	6	1375000	14	4.2221e-19	4.4603e-16
6	455000	7	785000	26	4.46997e-19	4.7185e-16
4	1165000	9	1505000	14	4.47889e-19	4.72608e-16
2	445000	4	635000	18	4.48126e-19	4.72674e-16
4	75000	4	1165000	17	4.57999e-19	4.82714e-16
1	425000	3	625000	24	4.59565e-19	4.84177e-16
13	95000	13	125000	86	4.60716e-19	4.85201e-16
4	785000	4	815000	218	4.65157e-19	4.89689e-16
7	595000	8	445000	14	4.8065e-19	5.05412e-16
7	35000	7	545000	20	4.83066e-19	5.07756e-16
7	805000	9	1245000	14	4.87638e-19	5.12364e-16
7	575000	8	45000	15	4.98598e-19	5.23677e-16
3	595000	7	795000	22	5.03967e-19	5.29112e-16
14	1735000	14	1785000	211	5.0513e-19	5.30129e-16
14	1055000	8	285000	20	5.08897e-19	5.33876e-16
14	1075000	6	485000	15	5.20064e-19	5.45171e-16
4	935000	4	1175000	37	5.23997e-19	5.49059e-16
5	1245000	5	1275000	218	5.23975e-19	5.49059e-16
5	355000	5	385000	208	5.90545e-19	6.17864e-16
11	25000	4	35000	14	5.92409e-19	6.19576e-16
10	935000	14	1065000	14	6.00768e-19	6.28077e-16
11	25000	8	25000	16	6.15308e-19	6.43031e-16
3	35000	8	25000	15	6.41958e-19	6.70366e-16
7	795000	9	1215000	23	6.53479e-19	6.82135e-16
8	285000	9	1255000	18	6.73127e-19	7.02106e-16
6	1375000	7	1425000	14	6.74383e-19	7.03147e-16
8	45000	8	1395000	21	6.92866e-19	7.21865e-16
4	1175000	9	25000	14	6.9577e-19	7.24336e-16
11	35000	6	1355000	16	7.12645e-19	7.4162e-16
8	1165000	8	1195000	157	7.40434e-19	7.6936e-16
6	5000	8	35000	17	7.41064e-19	7.69721e-16
13	35000	2	25000	13	7.49604e-19	7.77997e-16
12	1725000	7	595000	15	7.55012e-19	7.83312e-16
2	465000	9	1225000	20	7.65979e-19	7.94387e-16
5	185000	5	225000	163	7.74418e-19	8.02833e-16
13	2405000	13	2435000	201	7.94608e-19	8.23449e-16
1	365000	1	395000	281	7.98004e-19	8.26654e-16
1	565000	1	595000	53	8.00022e-19	8.28428e-16
12	1265000	9	1235000	22	8.09249e-19	8.37665e-16
11	855000	8	265000	28	8.12854e-19	8.41076e-16
11	825000	2	435000	19	8.14649e-19	8.42613e-16
13	1155000	8	295000	19	8.17343e-19	8.45078e-16
14	1195000	14	1245000	165	8.23351e-19	8.50967e-16
13	1165000	5	465000	13	8.54492e-19	8.82817e-16
2	465000	7	785000	25	8.556e-19	8.83626e-16
11	855000	2	475000	24	8.81504e-19	9.09343e-16
10	945000	6	455000	22	9.02284e-19	9.30074e-16
12	1105000	12	1135000	217	9.04303e-19	9.31801e-16
1	15000	9	1505000	9	9.2089e-19	9.48533e-16
11	2015000	12	35000	16	9.37993e-19	9.65785e-16
12	1695000	7	595000	16	9.3854e-19	9.65981e-16
12	1285000	13	1165000	12	9.44286e-19	9.71528e-16
10	1645000	11	2025000	14	9.77163e-19	1.00497e-15
4	655000	7	785000	22	9.99353e-19	1.02741e-15
4	665000	7	785000	25	1.01008e-18	1.03805e-15
1	465000	11	825000	21	1.01168e-18	1.03929e-15
11	855000	3	605000	20	1.03065e-18	1.05798e-15
3	625000	7	785000	28	1.03124e-18	1.05819e-15
7	25000	8	25000	14	1.03404e-18	1.06066e-15
12	465000	12	495000	221	1.06692e-18	1.09274e-15
12	1265000	8	315000	23	1.08971e-18	1.11525e-15
2	455000	7	795000	21	1.10049e-18	1.12585e-15
13	2895000	5	1335000	13	1.12957e-18	1.15473e-15
14	1965000	14	1995000	150	1.13558e-18	1.16044e-15
3	625000	9	1225000	22	1.14991e-18	1.17464e-15
2	25000	6	1375000	13	1.16965e-18	1.19436e-15
11	165000	11	1965000	39	1.18757e-18	1.21175e-15
11	1335000	11	1375000	186	1.23321e-18	1.25738e-15
3	585000	7	815000	18	1.23275e-18	1.25738e-15
4	1175000	8	1445000	13	1.23995e-18	1.26377e-15
11	855000	13	1175000	25	1.24187e-18	1.26525e-15
7	25000	8	35000	14	1.24229e-18	1.26525e-15
3	595000	9	1235000	18	1.24448e-18	1.26697e-15
12	2045000	12	2075000	186	1.27671e-18	1.29929e-15
12	1265000	2	425000	25	1.2898e-18	1.31212e-15
10	25000	13	2895000	11	1.3005e-18	1.32252e-15
2	465000	5	445000	24	1.32401e-18	1.34591e-15
7	505000	7	605000	68	1.39111e-18	1.41254e-15
12	1265000	6	485000	20	1.39689e-18	1.41788e-15
4	1155000	6	1355000	13	1.40058e-18	1.4211e-15
12	1265000	4	655000	21	1.41228e-18	1.4319e-15
14	1085000	2	445000	21	1.41903e-18	1.43821e-15
6	215000	6	245000	153	1.4346e-18	1.45345e-15
11	1505000	11	1685000	101	1.45288e-18	1.47142e-15
12	1275000	13	1185000	19	1.45943e-18	1.4775e-15
13	1175000	5	475000	23	1.46987e-18	1.48752e-15
7	785000	8	275000	26	1.48877e-18	1.50609e-15
4	555000	4	595000	21	1.48936e-18	1.50613e-15
10	535000	10	565000	220	1.52893e-18	1.54442e-15
3	1035000	8	35000	16	1.56002e-18	1.57407e-15
3	465000	3	495000	195	1.56162e-18	1.57509e-15
10	35000	8	25000	15	1.56277e-18	1.57567e-15
1	35000	4	965000	14	1.57141e-18	1.5838e-15
5	455000	6	475000	15	1.60588e-18	1.61794e-15
12	1295000	3	625000	24	1.65533e-18	1.66653e-15
4	35000	4	965000	16	1.70294e-18	1.71319e-15
12	55000	12	765000	32	1.72074e-18	1.73046e-15
7	555000	8	435000	18	1.7383e-18	1.74683e-15
11	25000	7	15000	10	1.75462e-18	1.76192e-15
12	1735000	12	2245000	21	1.79963e-18	1.80646e-15
11	2015000	9	25000	13	1.83535e-18	1.84163e-15
11	25000	8	1445000	13	1.85478e-18	1.86044e-15
13	2445000	13	2475000	177	1.92017e-18	1.9239e-15
5	895000	5	955000	103	1.93665e-18	1.9397e-15
12	35000	4	965000	16	1.99768e-18	1.99862e-15
4	55000	8	1435000	15	2.02306e-18	2.02252e-15
11	2025000	5	1325000	15	2.09807e-18	2.09674e-15
11	825000	2	465000	23	2.12e-18	2.11788e-15
14	1065000	7	815000	17	2.12283e-18	2.11993e-15
5	1045000	5	1105000	73	2.1782e-18	2.17363e-15
2	585000	2	615000	196	2.2306e-18	2.2251e-15
11	45000	3	1035000	14	2.2688e-18	2.26072e-15
11	1865000	11	1955000	141	2.27028e-18	2.26137e-15
4	295000	4	335000	201	2.28309e-18	2.27329e-15
11	855000	8	275000	25	2.34267e-18	2.33091e-15
12	1705000	7	565000	15	2.37176e-18	2.35899e-15
11	35000	3	75000	18	2.43893e-18	2.42492e-15
7	1425000	8	1435000	14	2.50982e-18	2.49358e-15
10	1645000	5	25000	11	2.52773e-18	2.51045e-15
1	35000	5	25000	12	2.53942e-18	2.52114e-15
10	1425000	10	1455000	143	2.58224e-18	2.56084e-15
11	825000	4	635000	20	2.60984e-18	2.58727e-15
12	55000	8	1415000	15	2.68007e-18	2.65593e-15
11	2035000	9	25000	13	2.76859e-18	2.73866e-15
13	2565000	13	2595000	133	2.84502e-18	2.81018e-15
11	45000	11	2025000	16	2.89474e-18	2.85826e-15
7	245000	7	275000	228	2.96695e-18	2.92849e-15
11	25000	6	1365000	15	2.99431e-18	2.95443e-15
13	1145000	3	625000	21	3.02879e-18	2.98736e-15
11	45000	4	55000	15	3.04657e-18	3.00382e-15
12	1285000	5	455000	13	3.06332e-18	3.01924e-15
5	475000	7	845000	23	3.24286e-18	3.19503e-15
6	1135000	6	1195000	153	3.39147e-18	3.34024e-15
13	1155000	9	1235000	19	3.39708e-18	3.34456e-15
12	1275000	7	785000	24	3.42161e-18	3.36749e-15
12	1725000	8	435000	15	3.44963e-18	3.39384e-15
12	1695000	7	535000	17	3.46161e-18	3.40439e-15
13	335000	13	365000	201	3.52555e-18	3.46602e-15
11	1795000	11	1825000	132	3.63718e-18	3.57319e-15
11	45000	7	1425000	14	3.68439e-18	3.61694e-15
14	1025000	14	1055000	247	3.69914e-18	3.63012e-15
11	825000	7	835000	23	3.7202e-18	3.64947e-15
14	1085000	3	595000	20	3.75653e-18	3.68245e-15
11	2005000	5	1335000	15	3.79897e-18	3.72271e-15
12	1395000	12	1435000	276	3.8719e-18	3.79281e-15
11	825000	13	1155000	22	3.97812e-18	3.89546e-15
14	3285000	5	1335000	11	4.00965e-18	3.92492e-15
13	45000	7	535000	14	4.04844e-18	3.96005e-15
14	15000	5	1335000	12	4.08682e-18	3.99575e-15
3	725000	3	755000	129	4.08641e-18	3.99575e-15
10	1645000	13	35000	12	4.11678e-18	4.02255e-15
11	1505000	11	1955000	68	4.13759e-18	4.04143e-15
8	45000	8	1405000	20	4.1881e-18	4.08931e-15
12	35000	8	1415000	15	4.19896e-18	4.09844e-15
12	1675000	12	1745000	83	4.23616e-18	4.13217e-15
7	555000	8	25000	19	4.23504e-18	4.13217e-15
8	25000	9	1495000	13	4.27552e-18	4.1682e-15
12	55000	7	1425000	17	4.35082e-18	4.23905e-15
11	825000	7	825000	18	4.57338e-18	4.45112e-15
5	915000	5	1105000	58	4.59525e-18	4.4708e-15
7	815000	8	265000	24	4.61573e-18	4.48912e-15
13	1145000	7	835000	19	4.63577e-18	4.507e-15
3	45000	3	125000	43	4.92948e-18	4.79084e-15
10	25000	7	1425000	13	5.01971e-18	4.87678e-15
6	1375000	8	45000	15	5.03508e-18	4.88823e-15
1	615000	11	25000	14	5.21475e-18	5.05905e-15
1	35000	1	605000	14	5.31569e-18	5.15513e-15
7	555000	8	35000	19	5.39188e-18	5.22716e-15
14	1795000	14	1835000	119	5.40327e-18	5.23634e-15
12	35000	13	35000	15	5.42939e-18	5.25977e-15
10	25000	11	35000	14	5.46403e-18	5.29145e-15
12	1135000	12	1175000	203	5.52491e-18	5.3485e-15
11	855000	9	1215000	22	5.53889e-18	5.36013e-15
8	1395000	8	1445000	51	5.55458e-18	5.3734e-15
3	605000	8	295000	16	5.55673e-18	5.37357e-15
7	25000	7	55000	32	5.5912e-18	5.40307e-15
10	35000	2	915000	11	5.67679e-18	5.48382e-15
10	1515000	3	35000	13	5.70359e-18	5.50385e-15
12	485000	12	535000	137	5.76413e-18	5.56029e-15
7	555000	7	1425000	24	5.88935e-18	5.67706e-15
4	935000	7	585000	16	5.90304e-18	5.68824e-15
2	25000	4	965000	13	6.03194e-18	5.81039e-15
12	1305000	5	475000	19	6.28922e-18	6.05394e-15
14	675000	14	705000	173	6.38163e-18	6.14072e-15
7	25000	9	1505000	11	6.40307e-18	6.15916e-15
3	615000	9	1235000	17	6.64328e-18	6.38797e-15
12	1275000	13	1155000	20	6.64735e-18	6.38963e-15
10	1645000	13	45000	12	6.65323e-18	6.39302e-15
10	1365000	10	1395000	177	6.86402e-18	6.59323e-15
7	785000	8	265000	28	6.93682e-18	6.65846e-15
13	35000	13	105000	62	6.99237e-18	6.70941e-15
13	1175000	4	635000	19	7.25676e-18	6.96065e-15
8	1445000	9	25000	12	7.39166e-18	7.08755e-15
11	1685000	11	1955000	95	7.53092e-18	7.21853e-15
8	35000	9	1505000	13	7.66091e-18	7.34054e-15
9	145000	9	185000	138	7.66221e-18	7.34054e-15
12	1265000	14	1035000	26	7.77401e-18	7.44367e-15
3	35000	3	125000	45	8.04605e-18	7.69873e-15
12	1265000	8	345000	25	8.08891e-18	7.73702e-15
3	25000	3	1055000	8	8.30353e-18	7.93672e-15
6	135000	6	175000	162	8.38472e-18	8.01151e-15
13	35000	7	15000	9	8.4916e-18	8.11078e-15
11	2025000	12	15000	13	8.56752e-18	8.17875e-15
4	975000	7	605000	16	8.56576e-18	8.17875e-15
10	555000	10	585000	123	8.63185e-18	8.23318e-15
13	1735000	13	1765000	162	8.63546e-18	8.23374e-15
5	445000	7	785000	27	8.70614e-18	8.29822e-15
7	675000	7	705000	154	9.01771e-18	8.59218e-15
11	2025000	4	965000	14	9.31832e-18	8.8755e-15
7	1335000	7	1365000	132	9.43622e-18	8.98465e-15
13	2435000	13	2485000	131	9.50953e-18	9.04811e-15
9	445000	9	475000	176	9.5385e-18	9.07251e-15
3	115000	3	1035000	24	9.56617e-18	9.09565e-15
6	475000	9	1245000	15	9.78213e-18	9.29773e-15
12	1715000	12	2245000	18	9.82564e-18	9.33583e-15
14	1355000	14	1425000	162	9.82683e-18	9.33583e-15
11	835000	14	1075000	14	9.8373e-18	9.34038e-15
5	325000	5	355000	227	9.91125e-18	9.40732e-15
3	625000	5	475000	24	9.94307e-18	9.43423e-15
5	465000	8	295000	18	1.00649e-17	9.54316e-15
13	25000	4	1175000	10	1.0131e-17	9.60248e-15
7	385000	7	415000	281	1.01707e-17	9.63673e-15
10	935000	9	1235000	15	1.01755e-17	9.638e-15
13	1155000	7	815000	20	1.04463e-17	9.89097e-15
4	35000	6	5000	14	1.06311e-17	1.00555e-14
12	1265000	8	285000	19	1.08089e-17	1.02201e-14
4	975000	7	585000	14	1.08714e-17	1.02756e-14
11	1825000	11	1965000	69	1.09582e-17	1.0354e-14
13	1175000	3	585000	18	1.09962e-17	1.03864e-14
1	45000	4	55000	13	1.11405e-17	1.0519e-14
11	825000	6	455000	23	1.12558e-17	1.06205e-14
11	835000	6	485000	15	1.13031e-17	1.06614e-14
12	55000	4	55000	18	1.14391e-17	1.07785e-14
10	1645000	4	55000	14	1.14912e-17	1.08239e-14
11	25000	13	45000	13	1.15308e-17	1.08573e-14
1	465000	8	295000	17	1.19183e-17	1.12106e-14
12	1265000	8	275000	24	1.24967e-17	1.17465e-14
11	825000	5	475000	23	1.28511e-17	1.20672e-14
14	1085000	9	1225000	20	1.30212e-17	1.22227e-14
11	855000	3	625000	26	1.33094e-17	1.24803e-14
4	985000	4	1175000	33	1.34731e-17	1.26295e-14
12	1265000	13	1195000	21	1.38731e-17	1.29999e-14
4	1185000	7	25000	10	1.41286e-17	1.32348e-14
10	955000	4	665000	19	1.42004e-17	1.32929e-14
1	35000	1	625000	11	1.43255e-17	1.34054e-14
12	1275000	14	1075000	16	1.43514e-17	1.3425e-14
5	25000	8	45000	13	1.43546e-17	1.3425e-14
11	2025000	2	25000	14	1.43795e-17	1.3442e-14
7	545000	8	435000	15	1.44188e-17	1.34741e-14
14	1945000	14	1985000	206	1.45146e-17	1.3559e-14
11	825000	5	455000	15	1.56796e-17	1.46322e-14
11	1815000	11	1955000	100	1.58058e-17	1.47449e-14
12	1275000	3	605000	17	1.64935e-17	1.53759e-14
13	2865000	13	2895000	37	1.66633e-17	1.55235e-14
4	55000	7	585000	15	1.71866e-17	1.59946e-14
10	965000	14	1085000	24	1.74155e-17	1.62022e-14
11	25000	9	1505000	12	1.7512e-17	1.62863e-14
11	2015000	5	1335000	14	1.75675e-17	1.63324e-14
1	465000	4	625000	18	1.78304e-17	1.65598e-14
12	1295000	13	1155000	20	1.8148e-17	1.6849e-14
11	35000	11	75000	35	1.816e-17	1.68544e-14
9	45000	9	1505000	11	1.82624e-17	1.69437e-14
3	605000	9	1235000	16	1.873e-17	1.73715e-14
14	3005000	14	3055000	78	1.88533e-17	1.748e-14
13	35000	8	1435000	12	1.96448e-17	1.8189e-14
4	35000	8	35000	14	1.96848e-17	1.82198e-14
12	15000	6	5000	13	1.97477e-17	1.82718e-14
8	1105000	8	1135000	165	2.00331e-17	1.85296e-14
10	1625000	2	25000	13	2.02504e-17	1.87242e-14
11	1795000	11	1965000	95	2.02612e-17	1.87279e-14
13	45000	4	55000	14	2.04165e-17	1.8865e-14
7	1175000	7	1205000	264	2.05663e-17	1.89905e-14
10	25000	12	15000	11	2.0625e-17	1.90357e-14
1	535000	4	555000	15	2.06223e-17	1.90357e-14
8	45000	8	455000	30	2.18077e-17	2.01095e-14
11	2035000	5	1325000	13	2.20433e-17	2.03199e-14
10	215000	10	245000	207	2.25515e-17	2.07813e-14
1	615000	10	35000	13	2.26044e-17	2.0823e-14
4	295000	4	1035000	41	2.27987e-17	2.09878e-14
11	855000	4	665000	23	2.29341e-17	2.11053e-14
3	75000	4	55000	17	2.32962e-17	2.1424e-14
6	815000	6	845000	174	2.37171e-17	2.18036e-14
12	1285000	3	585000	15	2.41665e-17	2.21944e-14
10	945000	4	655000	18	2.42248e-17	2.22404e-14
1	615000	4	45000	12	2.50117e-17	2.2955e-14
11	35000	11	2005000	17	2.51445e-17	2.30614e-14
13	105000	13	135000	214	2.52411e-17	2.31421e-14
10	1615000	6	1365000	12	2.53887e-17	2.32697e-14
4	975000	4	1145000	23	2.56881e-17	2.35282e-14
14	1085000	7	785000	25	2.63233e-17	2.41019e-14
11	2035000	14	3275000	11	2.64446e-17	2.42048e-14
12	35000	14	3205000	14	2.65754e-17	2.43163e-14
11	1965000	14	3105000	30	2.67161e-17	2.44368e-14
13	2475000	13	2535000	126	2.70216e-17	2.4708e-14
4	45000	7	25000	11	2.70683e-17	2.47424e-14
1	435000	12	1295000	22	2.7905e-17	2.54986e-14
7	535000	8	45000	17	2.8755e-17	2.62665e-14
13	1165000	14	1085000	13	2.88127e-17	2.63104e-14
13	35000	4	965000	12	2.88517e-17	2.63371e-14
7	1195000	7	1275000	156	3.18105e-17	2.90283e-14
14	1055000	9	1255000	22	3.2158e-17	2.93257e-14
4	15000	4	1195000	7	3.26972e-17	2.97975e-14
11	825000	4	665000	22	3.28155e-17	2.98952e-14
13	45000	3	35000	12	3.33615e-17	3.03825e-14
5	185000	5	215000	152	3.35339e-17	3.05293e-14
11	825000	3	615000	19	3.37641e-17	3.07183e-14
11	835000	7	805000	15	3.4528e-17	3.14028e-14
4	965000	8	25000	14	3.51405e-17	3.19385e-14
14	425000	14	465000	169	3.53321e-17	3.21019e-14
12	775000	12	905000	33	3.57736e-17	3.24813e-14
11	25000	8	1435000	13	3.63003e-17	3.29376e-14
1	155000	1	185000	115	3.68503e-17	3.34255e-14
1	615000	3	45000	12	3.74809e-17	3.39748e-14
2	455000	5	465000	17	3.76298e-17	3.40985e-14
12	1705000	12	2225000	17	3.85465e-17	3.49175e-14
4	1095000	4	1125000	175	3.91422e-17	3.54453e-14
14	1085000	4	655000	19	3.93154e-17	3.55903e-14
13	925000	13	955000	200	3.96383e-17	3.58706e-14
13	45000	9	25000	12	4.01033e-17	3.62794e-14
4	925000	4	1035000	109	4.11557e-17	3.72066e-14
4	965000	8	35000	14	4.21677e-17	3.81089e-14
10	375000	10	405000	292	4.28769e-17	3.87241e-14
11	855000	4	655000	20	4.40768e-17	3.97814e-14
12	1295000	3	585000	17	4.49812e-17	4.05842e-14
11	1685000	11	1965000	91	4.49991e-17	4.05868e-14
7	525000	7	585000	32	4.50974e-17	4.06621e-14
12	1705000	7	585000	13	4.60902e-17	4.15435e-14
6	1365000	9	1485000	12	4.67576e-17	4.21171e-14
14	3005000	14	3035000	120	4.88657e-17	4.39578e-14
4	295000	4	385000	124	4.94909e-17	4.44908e-14
13	45000	6	1365000	13	4.95266e-17	4.45081e-14
12	1735000	12	1785000	70	4.98387e-17	4.47739e-14
1	615000	10	1625000	13	5.00295e-17	4.49155e-14
2	25000	2	875000	16	5.22554e-17	4.68985e-14
1	555000	1	615000	49	5.40655e-17	4.8491e-14
12	855000	12	885000	160	5.48918e-17	4.92159e-14
13	2475000	13	2575000	104	5.51891e-17	4.94661e-14
14	1995000	14	2025000	112	5.52596e-17	4.9513e-14
7	765000	7	845000	103	5.53923e-17	4.96155e-14
3	595000	4	635000	16	5.58369e-17	4.99809e-14
14	655000	14	695000	166	5.59232e-17	5.00417e-14
2	445000	6	475000	19	5.62225e-17	5.02929e-14
11	1915000	11	1965000	142	5.65495e-17	5.05688e-14
5	435000	9	1235000	17	5.66517e-17	5.06435e-14
4	135000	4	165000	118	5.69461e-17	5.089e-14
6	1365000	7	545000	15	5.70265e-17	5.09451e-14
7	25000	7	525000	14	5.74773e-17	5.1331e-14
1	615000	9	1465000	12	5.76346e-17	5.14546e-14
4	105000	4	145000	130	5.79184e-17	5.1691e-14
12	35000	6	5000	17	5.86148e-17	5.22954e-14
2	445000	4	625000	18	5.92829e-17	5.2874e-14
4	635000	8	295000	16	5.94822e-17	5.3017e-14
13	35000	7	555000	15	6.0027e-17	5.34676e-14
1	35000	12	35000	16	6.0032e-17	5.34676e-14
1	35000	1	115000	65	6.11374e-17	5.4421e-14
4	555000	8	45000	14	6.12733e-17	5.45242e-14
11	855000	12	1265000	25	6.19879e-17	5.51394e-14
3	765000	3	795000	190	6.1985e-17	5.51394e-14
10	925000	14	1055000	19	6.23792e-17	5.54539e-14
4	835000	4	865000	231	6.31033e-17	5.60792e-14
4	565000	4	975000	19	6.44394e-17	5.72292e-14
6	795000	6	825000	201	6.4966e-17	5.76781e-14
10	1645000	2	915000	10	6.60221e-17	5.85774e-14
6	5000	6	1335000	15	6.75607e-17	5.98839e-14
13	45000	2	25000	12	6.7726e-17	6.00109e-14
11	25000	12	2265000	9	6.81972e-17	6.04087e-14
6	1385000	9	1495000	10	6.83347e-17	6.05108e-14
12	2115000	12	2155000	119	6.84408e-17	6.05851e-14
14	1165000	14	1195000	220	7.04659e-17	6.23574e-14
11	25000	12	15000	12	7.1679e-17	6.34104e-14
12	2245000	4	975000	14	7.21262e-17	6.37852e-14
11	855000	9	1255000	22	7.48532e-17	6.61324e-14
14	2095000	14	2135000	198	7.61408e-17	6.72263e-14
14	2745000	14	2775000	166	7.68195e-17	6.77815e-14
1	455000	2	455000	13	7.86605e-17	6.93609e-14
8	335000	8	365000	254	7.87133e-17	6.93849e-14
1	435000	7	785000	25	7.96356e-17	7.01753e-14
13	1155000	2	445000	18	8.09333e-17	7.12496e-14
11	1965000	13	105000	27	8.19486e-17	7.21201e-14
12	1285000	14	1065000	14	8.24417e-17	7.25305e-14
8	295000	9	1245000	13	8.28694e-17	7.28832e-14
3	35000	4	1165000	14	8.34747e-17	7.33918e-14
2	445000	6	495000	20	8.39711e-17	7.38045e-14
4	145000	4	1165000	23	8.54754e-17	7.51023e-14
2	925000	4	25000	8	8.59149e-17	7.54642e-14
2	465000	8	295000	18	8.6637e-17	7.60738e-14
10	1625000	4	1155000	12	8.79073e-17	7.71643e-14
14	1055000	7	805000	19	8.79299e-17	7.71643e-14
10	945000	7	765000	20	8.87005e-17	7.78104e-14
1	455000	13	1175000	15	9.16457e-17	8.03681e-14
2	915000	6	1375000	10	9.46128e-17	8.29433e-14
4	925000	4	1105000	65	9.54488e-17	8.36492e-14
7	435000	7	465000	136	9.55269e-17	8.36907e-14
12	35000	12	765000	30	9.73851e-17	8.52638e-14
12	1685000	12	1745000	74	9.8011e-17	8.57842e-14
5	1335000	6	1365000	15	9.88365e-17	8.64788e-14
10	925000	9	1235000	16	9.96178e-17	8.71344e-14
4	75000	4	965000	14	9.97711e-17	8.72404e-14
4	965000	4	1005000	117	1.02275e-16	8.93441e-14
13	2855000	13	2895000	35	1.04064e-16	9.08775e-14
14	1055000	3	615000	19	1.04579e-16	9.12982e-14
8	265000	9	1235000	21	1.04945e-16	9.15875e-14
14	1425000	14	1475000	163	1.09071e-16	9.51275e-14
12	1295000	2	425000	21	1.09449e-16	9.54265e-14
1	35000	10	25000	12	1.10432e-16	9.62528e-14
6	635000	6	665000	259	1.11211e-16	9.69006e-14
1	455000	7	795000	16	1.14778e-16	9.99773e-14
11	855000	5	445000	25	1.14968e-16	1.0011e-13
11	885000	7	795000	25	1.18344e-16	1.03017e-13
4	135000	4	1105000	25	1.18397e-16	1.0303e-13
10	925000	2	445000	16	1.22192e-16	1.06299e-13
1	595000	8	45000	13	1.22643e-16	1.06657e-13
1	15000	1	615000	12	1.22855e-16	1.06807e-13
4	975000	7	575000	12	1.24592e-16	1.08283e-13
10	945000	13	1165000	12	1.25004e-16	1.08606e-13
10	935000	13	1165000	10	1.25198e-16	1.0874e-13
6	1375000	8	1445000	11	1.26265e-16	1.09632e-13
3	425000	3	455000	236	1.28227e-16	1.113e-13
12	1195000	12	1225000	294	1.29779e-16	1.12579e-13
4	15000	4	55000	32	1.30565e-16	1.13221e-13
11	2025000	14	3285000	10	1.32329e-16	1.14713e-13
1	465000	12	1295000	18	1.3326e-16	1.15484e-13
11	695000	11	735000	208	1.3503e-16	1.1698e-13
7	545000	7	1425000	19	1.37777e-16	1.19322e-13
3	125000	3	1035000	19	1.39689e-16	1.2094e-13
5	335000	5	395000	137	1.41658e-16	1.22606e-13
10	925000	7	815000	17	1.42086e-16	1.22937e-13
11	835000	3	595000	15	1.43582e-16	1.24192e-13
12	1695000	8	25000	16	1.45373e-16	1.25661e-13
3	15000	3	45000	29	1.46336e-16	1.26453e-13
13	45000	7	545000	13	1.51507e-16	1.30838e-13
12	35000	14	45000	18	1.53092e-16	1.32165e-13
1	35000	10	1675000	10	1.56487e-16	1.35053e-13
2	445000	9	1255000	18	1.57465e-16	1.35811e-13
7	415000	7	455000	156	1.59853e-16	1.37828e-13
11	835000	14	1055000	18	1.60563e-16	1.38395e-13
11	2015000	2	25000	12	1.61701e-16	1.39332e-13
7	35000	7	585000	16	1.68749e-16	1.45313e-13
8	165000	8	215000	109	1.72611e-16	1.48544e-13
6	545000	6	575000	287	1.75345e-16	1.5085e-13
6	5000	9	1535000	8	1.81317e-16	1.55938e-13
10	955000	14	1085000	19	1.82783e-16	1.57099e-13
14	3225000	14	3255000	61	1.86707e-16	1.60422e-13
12	35000	8	1405000	16	1.87475e-16	1.61031e-13
13	1175000	3	605000	17	1.91646e-16	1.64458e-13
4	655000	6	455000	18	1.93679e-16	1.66149e-13
12	55000	13	45000	14	1.99559e-16	1.7114e-13
14	1055000	2	445000	20	2.02359e-16	1.73432e-13
12	1695000	12	2195000	23	2.03667e-16	1.74498e-13
12	15000	8	1405000	12	2.05526e-16	1.76035e-13
6	5000	9	1505000	12	2.10353e-16	1.80057e-13
10	35000	10	1605000	13	2.15785e-16	1.84532e-13
12	1295000	13	1165000	12	2.17259e-16	1.85734e-13
1	35000	10	1625000	13	2.22577e-16	1.9016e-13
11	815000	3	595000	18	2.27113e-16	1.93975e-13
12	15000	12	775000	16	2.30474e-16	1.96722e-13
2	475000	7	795000	22	2.3223e-16	1.98159e-13
11	2025000	8	45000	16	2.39256e-16	2.03962e-13
12	1415000	12	1445000	289	2.43837e-16	2.07803e-13
11	35000	11	1995000	15	2.46822e-16	2.1028e-13
3	615000	7	805000	15	2.51773e-16	2.14431e-13
4	735000	4	775000	134	2.56661e-16	2.18389e-13
5	485000	5	515000	129	2.57135e-16	2.18724e-13
13	35000	4	1155000	11	2.61801e-16	2.22623e-13
11	865000	7	785000	22	2.63118e-16	2.23673e-13
5	445000	7	775000	23	2.63228e-16	2.23697e-13
4	35000	6	1355000	12	2.65912e-16	2.25907e-13
10	1295000	10	1325000	226	2.66943e-16	2.26712e-13
13	2885000	8	1405000	11	2.68707e-16	2.28139e-13
2	315000	2	365000	178	2.7078e-16	2.29828e-13
13	1165000	3	595000	11	2.78253e-16	2.35876e-13
12	35000	6	1375000	14	2.80064e-16	2.37263e-13
12	2245000	6	1355000	13	2.82406e-16	2.39098e-13
1	35000	7	585000	13	2.84003e-16	2.40376e-13
1	565000	4	605000	12	2.86054e-16	2.42036e-13
12	1305000	7	845000	18	2.8764e-16	2.43302e-13
2	25000	2	925000	11	2.94821e-16	2.49299e-13
11	115000	12	35000	15	2.96407e-16	2.50562e-13
14	1065000	5	465000	15	2.96901e-16	2.50901e-13
13	45000	6	1335000	11	2.99468e-16	2.52914e-13
8	1385000	8	1415000	62	2.99752e-16	2.53075e-13
12	1265000	6	475000	22	3.00322e-16	2.53478e-13
4	35000	7	25000	11	3.01932e-16	2.54757e-13
3	75000	8	45000	17	3.0347e-16	2.55976e-13
13	1175000	6	495000	22	3.05497e-16	2.57606e-13
8	25000	9	1505000	12	3.0558e-16	2.57606e-13
12	1705000	4	55000	14	3.09154e-16	2.60528e-13
10	35000	12	1725000	13	3.12108e-16	2.62936e-13
12	1265000	12	1305000	138	3.25521e-16	2.73981e-13
12	1725000	4	1165000	15	3.31925e-16	2.79112e-13
13	1175000	9	1215000	19	3.33868e-16	2.80659e-13
1	455000	10	945000	14	3.43088e-16	2.88242e-13
5	25000	7	1425000	11	3.42994e-16	2.88242e-13
10	955000	7	835000	18	3.44642e-16	2.89448e-13
11	825000	5	435000	19	3.54593e-16	2.97713e-13
10	1405000	10	1455000	78	3.56389e-16	2.99129e-13
13	45000	4	1175000	12	3.60051e-16	3.02109e-13
12	35000	9	45000	12	3.65434e-16	3.06532e-13
11	845000	12	1285000	14	3.67941e-16	3.08444e-13
12	15000	12	45000	50	3.75641e-16	3.14802e-13
11	1805000	11	1955000	85	3.78448e-16	3.17057e-13
4	975000	4	1005000	167	3.79111e-16	3.17515e-13
11	1695000	11	1725000	157	3.83758e-16	3.21209e-13
13	1855000	13	1885000	192	4.00371e-16	3.34908e-13
2	325000	2	375000	140	4.02955e-16	3.36965e-13
12	1735000	13	35000	11	4.05306e-16	3.38828e-13
7	45000	7	555000	20	4.12046e-16	3.44356e-13
4	125000	4	165000	78	4.28874e-16	3.58199e-13
12	35000	8	1395000	16	4.29429e-16	3.58553e-13
11	1325000	11	1955000	40	4.36184e-16	3.64081e-13
1	615000	4	55000	14	4.37875e-16	3.65381e-13
4	625000	6	475000	19	4.41858e-16	3.68592e-13
10	945000	3	585000	16	4.56345e-16	3.80443e-13
11	885000	7	785000	25	4.57204e-16	3.81043e-13
4	795000	4	825000	103	4.6265e-16	3.85463e-13
6	125000	6	175000	94	4.66305e-16	3.88389e-13
8	1315000	8	1365000	123	4.6769e-16	3.89423e-13
12	1695000	4	55000	16	5.16116e-16	4.29089e-13
5	445000	6	475000	22	5.21167e-16	4.33156e-13
11	2025000	4	55000	15	5.26024e-16	4.37059e-13
1	435000	14	1055000	23	5.37495e-16	4.46454e-13
1	555000	8	435000	13	5.40834e-16	4.4909e-13
2	485000	7	785000	23	5.4129e-16	4.49331e-13
10	1645000	3	1035000	12	5.49278e-16	4.55824e-13
8	1115000	8	1165000	125	5.52098e-16	4.58024e-13
10	1615000	11	35000	12	5.52636e-16	4.58331e-13
6	225000	6	255000	106	5.60392e-16	4.64621e-13
11	35000	13	25000	10	5.74471e-16	4.76004e-13
12	1665000	12	1695000	177	5.81303e-16	4.81518e-13
12	1295000	9	1265000	16	5.8243e-16	4.82305e-13
7	85000	7	595000	24	5.92767e-16	4.90715e-13
11	15000	11	2035000	9	5.94178e-16	4.91734e-13
3	625000	6	475000	22	5.9474e-16	4.92049e-13
13	45000	6	1375000	11	5.95549e-16	4.92569e-13
4	965000	4	1085000	45	5.9651e-16	4.93213e-13
10	1645000	12	1695000	13	6.04806e-16	4.99769e-13
12	1275000	2	465000	19	6.05089e-16	4.99852e-13
12	1365000	12	1405000	219	6.07033e-16	5.01305e-13
7	1415000	9	25000	9	6.08329e-16	5.02223e-13
11	1505000	11	1965000	63	6.09904e-16	5.0337e-13
1	535000	4	605000	15	6.11213e-16	5.04298e-13
1	615000	9	1525000	9	6.11876e-16	5.04692e-13
5	365000	5	395000	286	6.12815e-16	5.05313e-13
2	55000	8	45000	12	6.15929e-16	5.07573e-13
10	1605000	7	555000	14	6.24164e-16	5.14204e-13
6	495000	7	805000	18	6.28119e-16	5.17149e-13
4	1165000	7	595000	14	6.33034e-16	5.21037e-13
12	2115000	12	2145000	163	6.42896e-16	5.28995e-13
12	1265000	5	475000	22	6.44219e-16	5.29922e-13
2	635000	2	675000	133	6.59948e-16	5.42534e-13
13	1195000	3	595000	16	6.61167e-16	5.43371e-13
13	1775000	13	1825000	118	6.61996e-16	5.43888e-13
12	1705000	12	2195000	19	6.63803e-16	5.45208e-13
4	985000	4	1155000	28	6.64972e-16	5.46003e-13
14	1085000	5	475000	21	6.66011e-16	5.46692e-13
5	445000	6	485000	18	6.75148e-16	5.54024e-13
3	1035000	6	5000	14	6.97267e-16	5.7183e-13
5	475000	7	785000	23	6.97427e-16	5.7183e-13
12	55000	12	1695000	20	7.03059e-16	5.76233e-13
10	1605000	4	965000	11	7.11855e-16	5.8309e-13
11	2025000	6	1365000	14	7.20361e-16	5.8988e-13
3	595000	8	275000	18	7.21974e-16	5.91023e-13
4	555000	4	965000	18	7.22843e-16	5.91557e-13
10	875000	11	885000	20	7.24774e-16	5.92958e-13
3	615000	6	475000	17	7.30755e-16	5.97672e-13
11	2035000	8	45000	14	7.41694e-16	6.06436e-13
10	35000	6	1355000	12	7.51766e-16	6.14487e-13
2	25000	2	935000	10	7.58444e-16	6.19759e-13
8	415000	8	445000	127	7.62925e-16	6.23234e-13
12	265000	12	295000	188	7.69025e-16	6.28028e-13
2	465000	9	1205000	18	7.80531e-16	6.37233e-13
12	1275000	6	485000	16	7.94052e-16	6.48077e-13
5	465000	7	805000	16	8.04352e-16	6.56287e-13
13	35000	4	35000	11	8.41528e-16	6.86414e-13
12	1265000	2	475000	21	8.45678e-16	6.89592e-13
6	5000	7	555000	17	8.47368e-16	6.90763e-13
11	1955000	13	105000	26	8.51442e-16	6.93876e-13
1	615000	6	1365000	13	8.63237e-16	7.03278e-13
5	195000	5	235000	206	8.67109e-16	7.06221e-13
12	1385000	12	1415000	261	8.70476e-16	7.08539e-13
11	1865000	11	1965000	125	8.72517e-16	7.09988e-13
2	485000	5	445000	22	8.74477e-16	7.1137e-13
14	2505000	14	2545000	85	8.80962e-16	7.16431e-13
7	585000	8	445000	12	8.81181e-16	7.16431e-13
2	445000	5	465000	17	8.89814e-16	7.23198e-13
9	145000	9	225000	93	8.95495e-16	7.27597e-13
1	565000	8	45000	14	8.99271e-16	7.30447e-13
2	25000	3	45000	11	9.07408e-16	7.36837e-13
2	465000	4	655000	17	9.2913e-16	7.5425e-13
3	585000	7	825000	13	9.31758e-16	7.56157e-13
10	925000	13	1155000	16	9.45786e-16	7.67084e-13
10	1645000	9	1495000	10	9.47176e-16	7.67983e-13
4	555000	7	555000	14	9.91776e-16	8.03905e-13
2	25000	7	555000	15	1.00315e-15	8.12881e-13
4	35000	4	75000	43	1.00367e-15	8.13061e-13
12	35000	12	1705000	17	1.00859e-15	8.16804e-13
13	2895000	4	35000	10	1.01275e-15	8.19926e-13
9	25000	9	75000	37	1.02946e-15	8.33205e-13
5	1325000	7	1425000	13	1.03855e-15	8.40318e-13
12	1465000	12	1495000	143	1.05141e-15	8.49967e-13
11	855000	3	595000	19	1.05991e-15	8.56074e-13
2	25000	7	545000	13	1.06951e-15	8.63567e-13
12	55000	7	25000	13	1.07928e-15	8.71196e-13
1	35000	1	565000	19	1.08749e-15	8.77307e-13
12	55000	14	3225000	15	1.10472e-15	8.90151e-13
12	1725000	12	1755000	138	1.11757e-15	9.0024e-13
6	125000	6	155000	140	1.119e-15	9.01121e-13
4	55000	4	935000	22	1.17583e-15	9.46607e-13
7	415000	7	465000	125	1.17846e-15	9.48441e-13
13	35000	4	1125000	13	1.18461e-15	9.5311e-13
1	575000	8	45000	12	1.20842e-15	9.71696e-13
2	345000	2	375000	281	1.21052e-15	9.73095e-13
4	45000	4	1155000	12	1.21085e-15	9.73095e-13
4	975000	8	35000	14	1.2126e-15	9.74189e-13
14	1085000	2	415000	24	1.23434e-15	9.91363e-13
12	35000	12	1695000	20	1.24275e-15	9.97825e-13
1	65000	2	65000	8	1.26859e-15	1.01827e-12
4	55000	9	1395000	13	1.28839e-15	1.03386e-12
8	1085000	8	1125000	179	1.29599e-15	1.03965e-12
11	135000	13	105000	17	1.31875e-15	1.0576e-12
12	2245000	6	1385000	11	1.32079e-15	1.05892e-12
12	1695000	7	515000	13	1.34121e-15	1.07497e-12
6	5000	7	1435000	9	1.34949e-15	1.08129e-12
4	1165000	4	1195000	31	1.35782e-15	1.08765e-12
12	35000	14	3255000	13	1.36976e-15	1.09656e-12
4	925000	4	1085000	68	1.38208e-15	1.1061e-12
12	2215000	4	1165000	12	1.39313e-15	1.11462e-12
3	575000	4	665000	20	1.39605e-15	1.11663e-12
12	1285000	9	1255000	16	1.39874e-15	1.11812e-12
4	1175000	7	1425000	13	1.4006e-15	1.11928e-12
12	775000	12	1705000	16	1.40429e-15	1.12156e-12
4	45000	4	1125000	15	1.44913e-15	1.1567e-12
11	45000	13	35000	11	1.46643e-15	1.16983e-12
14	1075000	6	475000	15	1.47916e-15	1.1796e-12
13	45000	8	1405000	12	1.48902e-15	1.18645e-12
4	55000	4	155000	33	1.50485e-15	1.19871e-12
6	5000	7	15000	9	1.51008e-15	1.20253e-12
12	1295000	3	595000	17	1.51691e-15	1.20761e-12
4	975000	4	1105000	48	1.53136e-15	1.21877e-12
1	435000	11	825000	22	1.56981e-15	1.24899e-12
3	605000	6	475000	16	1.5891e-15	1.2636e-12
10	1675000	3	15000	7	1.59188e-15	1.26526e-12
13	45000	14	25000	9	1.60298e-15	1.27353e-12
1	455000	5	445000	15	1.61406e-15	1.28196e-12
14	3225000	14	3275000	39	1.63968e-15	1.30192e-12
14	1085000	2	465000	20	1.66198e-15	1.31924e-12
5	445000	6	495000	23	1.66203e-15	1.31924e-12
1	615000	7	25000	11	1.68154e-15	1.33399e-12
12	15000	7	25000	10	1.68948e-15	1.3399e-12
2	615000	2	645000	183	1.6948e-15	1.34373e-12
6	375000	6	405000	242	1.69935e-15	1.34694e-12
7	1105000	7	1155000	120	1.72928e-15	1.37026e-12
11	825000	13	1145000	18	1.73139e-15	1.37154e-12
5	1025000	5	1105000	83	1.74335e-15	1.3802e-12
11	825000	9	1205000	19	1.76441e-15	1.39607e-12
4	35000	8	15000	9	1.76571e-15	1.39669e-12
12	1725000	13	45000	12	1.77366e-15	1.40257e-12
13	1175000	3	625000	22	1.77664e-15	1.40452e-12
11	2025000	13	35000	12	1.78148e-15	1.40753e-12
5	1335000	7	25000	12	1.79162e-15	1.41513e-12
11	855000	11	885000	282	1.79746e-15	1.41933e-12
1	115000	4	1105000	19	1.80416e-15	1.42421e-12
13	1195000	7	785000	20	1.85424e-15	1.46331e-12
6	1375000	9	1505000	10	1.86547e-15	1.47175e-12
2	25000	2	865000	15	1.87204e-15	1.4765e-12
10	975000	3	625000	22	1.88369e-15	1.48526e-12
14	1085000	4	665000	20	1.89865e-15	1.49619e-12
1	455000	13	1165000	9	1.90774e-15	1.50205e-12
11	855000	6	495000	23	1.94611e-15	1.53181e-12
10	945000	11	815000	19	1.98493e-15	1.56147e-12
12	1735000	12	2225000	15	2.02244e-15	1.59052e-12
12	1695000	6	5000	15	2.036e-15	1.60072e-12
7	525000	7	595000	28	2.05665e-15	1.61648e-12
12	1245000	9	1205000	18	2.09333e-15	1.64484e-12
10	1625000	7	45000	10	2.10203e-15	1.6512e-12
4	1175000	6	1365000	13	2.11121e-15	1.65793e-12
9	225000	9	275000	99	2.18291e-15	1.71325e-12
4	985000	7	535000	14	2.1874e-15	1.71628e-12
6	1135000	6	1265000	116	2.25017e-15	1.764e-12
14	2145000	14	2195000	143	2.26085e-15	1.77186e-12
1	35000	9	25000	12	2.26355e-15	1.77347e-12
13	935000	13	965000	96	2.26749e-15	1.77605e-12
6	1135000	6	1185000	180	2.26955e-15	1.77715e-12
3	1035000	4	975000	13	2.27455e-15	1.78055e-12
6	5000	6	1385000	13	2.3119e-15	1.80927e-12
7	805000	9	1225000	15	2.33045e-15	1.82326e-12
12	1275000	6	495000	20	2.37386e-15	1.85615e-12
12	35000	8	35000	16	2.38045e-15	1.86077e-12
3	15000	3	1045000	8	2.38517e-15	1.86393e-12
4	555000	4	975000	19	2.4142e-15	1.88607e-12
2	455000	5	445000	18	2.42283e-15	1.89226e-12
7	1125000	7	1155000	141	2.47352e-15	1.93131e-12
11	855000	5	505000	23	2.47908e-15	1.93509e-12
13	475000	13	505000	150	2.504e-15	1.95342e-12
4	1165000	8	1435000	13	2.50822e-15	1.95615e-12
8	1435000	8	1465000	22	2.5178e-15	1.96306e-12
1	35000	7	1425000	13	2.52549e-15	1.96849e-12
4	85000	4	1155000	12	2.5299e-15	1.97136e-12
10	965000	12	1265000	23	2.54273e-15	1.98079e-12
12	35000	14	3235000	14	2.63347e-15	2.04913e-12
11	35000	7	535000	15	2.64529e-15	2.05775e-12
3	615000	9	1255000	16	2.6603e-15	2.06883e-12
13	1145000	8	265000	19	2.67188e-15	2.07724e-12
13	1115000	9	1205000	19	2.67981e-15	2.08281e-12
4	645000	5	455000	9	2.69644e-15	2.09394e-12
12	1215000	4	675000	19	2.72221e-15	2.11214e-12
7	415000	7	475000	104	2.72975e-15	2.11739e-12
11	2035000	4	55000	13	2.73818e-15	2.12332e-12
2	35000	2	65000	42	2.89689e-15	2.2432e-12
12	1835000	12	1865000	210	2.95013e-15	2.28377e-12
12	1275000	3	615000	16	2.96294e-15	2.29304e-12
13	1155000	9	1215000	17	2.96787e-15	2.2962e-12
1	35000	2	915000	10	2.97589e-15	2.30174e-12
14	2745000	14	2785000	200	3.0648e-15	2.36984e-12
11	2025000	4	1175000	13	3.11334e-15	2.4067e-12
10	35000	6	1375000	11	3.18588e-15	2.46137e-12
10	25000	13	25000	8	3.24094e-15	2.50249e-12
10	945000	3	615000	16	3.26412e-15	2.51967e-12
3	625000	4	675000	20	3.27419e-15	2.52673e-12
11	855000	3	615000	18	3.30558e-15	2.54951e-12
12	1275000	9	1255000	18	3.31006e-15	2.55223e-12
2	465000	6	475000	19	3.3364e-15	2.57182e-12
10	965000	7	785000	24	3.39619e-15	2.61642e-12
13	2895000	8	15000	8	3.40441e-15	2.62201e-12
1	515000	4	515000	20	3.42937e-15	2.64049e-12
1	45000	1	615000	15	3.45096e-15	2.6556e-12
4	35000	8	1435000	11	3.45095e-15	2.6556e-12
4	295000	4	395000	102	3.52129e-15	2.70819e-12
11	855000	13	1235000	23	3.5371e-15	2.71959e-12
2	415000	7	785000	26	3.57177e-15	2.74547e-12
1	25000	8	45000	10	3.60239e-15	2.76744e-12
5	495000	8	255000	25	3.60781e-15	2.77082e-12
9	1475000	9	1505000	33	3.64659e-15	2.79981e-12
3	755000	3	815000	148	3.70336e-15	2.8426e-12
12	1245000	14	1055000	21	3.77254e-15	2.89488e-12
11	855000	7	845000	22	3.79858e-15	2.91284e-12
14	255000	14	305000	145	3.79808e-15	2.91284e-12
3	595000	8	285000	14	3.8957e-15	2.98518e-12
13	1155000	3	605000	15	3.91556e-15	2.99956e-12
4	1175000	6	1355000	12	3.92877e-15	3.00883e-12
11	1855000	11	1885000	190	3.94529e-15	3.02063e-12
12	35000	7	1395000	12	3.98925e-15	3.05256e-12
14	1045000	4	655000	16	4.14521e-15	3.16923e-12
4	1005000	4	1165000	65	4.14993e-15	3.17195e-12
1	35000	12	15000	11	4.17402e-15	3.18947e-12
12	2245000	8	1405000	13	4.18465e-15	3.19669e-12
4	925000	4	1025000	64	4.21413e-15	3.2174e-12
7	785000	9	1205000	20	4.21577e-15	3.21775e-12
12	1305000	9	1195000	16	4.22421e-15	3.22329e-12
2	415000	3	625000	25	4.23881e-15	3.23352e-12
13	135000	13	205000	109	4.27599e-15	3.26097e-12
1	615000	4	15000	8	4.33419e-15	3.30443e-12
4	55000	8	1445000	12	4.4122e-15	3.36108e-12
10	975000	2	415000	23	4.46711e-15	3.40114e-12
1	455000	9	1245000	10	4.46604e-15	3.40114e-12
14	2285000	14	2315000	201	4.52701e-15	3.44391e-12
2	485000	8	265000	22	4.52518e-15	3.44391e-12
3	745000	3	775000	153	4.52474e-15	3.44391e-12
13	45000	13	2885000	10	4.62302e-15	3.51577e-12
1	615000	4	1155000	11	4.64483e-15	3.53137e-12
4	985000	7	555000	16	4.66761e-15	3.54769e-12
8	1165000	8	1205000	95	4.72399e-15	3.58954e-12
3	615000	7	825000	13	4.75042e-15	3.60862e-12
10	945000	12	1305000	16	4.76649e-15	3.61982e-12
11	855000	14	1085000	22	4.78172e-15	3.63037e-12
12	2245000	3	75000	14	4.79148e-15	3.63676e-12
11	135000	7	1355000	14	4.80341e-15	3.6448e-12
13	2835000	13	2865000	55	4.80495e-15	3.64495e-12
1	515000	4	535000	21	4.84061e-15	3.66996e-12
4	1105000	4	1165000	87	4.99367e-15	3.78495e-12
3	615000	7	795000	18	5.02406e-15	3.80692e-12
12	1385000	12	1435000	178	5.06984e-15	3.84054e-12
4	965000	6	15000	9	5.07044e-15	3.84054e-12
10	35000	4	55000	13	5.08324e-15	3.84855e-12
12	15000	12	65000	34	5.12312e-15	3.87766e-12
10	965000	3	625000	23	5.12751e-15	3.8799e-12
1	425000	2	475000	18	5.18598e-15	3.92306e-12
7	25000	7	565000	18	5.22472e-15	3.95016e-12
10	965000	11	855000	23	5.23859e-15	3.95955e-12
11	845000	9	1225000	14	5.25051e-15	3.96746e-12
5	1325000	6	5000	13	5.27236e-15	3.98286e-12
14	2135000	14	2185000	119	5.3042e-15	4.0058e-12
13	35000	14	3255000	10	5.3118e-15	4.01043e-12
10	965000	12	1255000	20	5.34053e-15	4.031e-12
10	1665000	9	1525000	6	5.34703e-15	4.03479e-12
2	455000	7	805000	14	5.37661e-15	4.05598e-12
2	465000	7	805000	16	5.44619e-15	4.10734e-12
10	1645000	8	25000	12	5.46215e-15	4.11823e-12
10	1555000	10	1645000	42	5.4789e-15	4.12971e-12
13	1155000	3	595000	16	5.64243e-15	4.25156e-12
3	1035000	6	1365000	13	5.64213e-15	4.25156e-12
4	1155000	7	595000	11	5.6513e-15	4.25612e-12
4	185000	4	295000	69	5.72722e-15	4.31211e-12
7	795000	8	305000	13	5.86665e-15	4.41586e-12
5	475000	8	295000	17	5.9374e-15	4.46665e-12
7	195000	7	275000	111	5.9545e-15	4.47827e-12
13	2575000	13	2605000	215	6.02568e-15	4.53055e-12
2	925000	7	1425000	9	6.14465e-15	4.61872e-12
4	125000	4	1165000	18	6.16725e-15	4.63443e-12
12	415000	12	445000	140	6.22348e-15	4.67539e-12
1	435000	12	1265000	22	6.30751e-15	4.73591e-12
4	1175000	5	25000	10	6.31157e-15	4.73764e-12
3	625000	8	265000	24	6.35887e-15	4.77052e-12
1	555000	7	555000	15	6.36304e-15	4.77233e-12
14	3285000	7	1425000	9	6.37255e-15	4.77814e-12
10	1645000	8	35000	12	6.38657e-15	4.78602e-12
14	3155000	14	3225000	67	6.39376e-15	4.79008e-12
11	25000	13	2885000	10	6.40512e-15	4.79728e-12
13	35000	13	2895000	10	6.43303e-15	4.81685e-12
14	3275000	9	65000	7	6.55216e-15	4.90471e-12
14	1075000	8	295000	13	6.64135e-15	4.96874e-12
12	1295000	3	615000	16	6.6515e-15	4.97496e-12
12	115000	12	155000	96	6.71757e-15	5.02299e-12
14	1085000	8	325000	20	6.71989e-15	5.02335e-12
4	665000	6	495000	20	6.77724e-15	5.06483e-12
1	35000	6	1355000	12	6.78449e-15	5.06886e-12
5	175000	5	235000	147	6.79839e-15	5.07785e-12
2	25000	7	15000	8	6.82073e-15	5.09313e-12
12	1705000	8	435000	12	6.82987e-15	5.09856e-12
2	25000	4	35000	11	6.90379e-15	5.15233e-12
12	35000	12	2195000	15	7.05405e-15	5.26302e-12
14	3245000	9	65000	8	7.07622e-15	5.27812e-12
10	945000	3	575000	19	7.1141e-15	5.30491e-12
7	1255000	7	1285000	202	7.11659e-15	5.30532e-12
1	615000	8	15000	9	7.26949e-15	5.41782e-12
12	105000	12	155000	88	7.27201e-15	5.41821e-12
[truncated: 36,060 more rows]

## Sheet: SCHIZONTS-FDR_0.1
Locus 1		Locus 2		Raw contact count	After ICE normalization
Chr.	Mid (10 kb)	Chr.	Mid (10 kb)		p-value	q-value
6	475000	7	815000	254	5.27487e-286	6.674e-282		FDR <0.01
12	2195000	9	65000	127	2.03824e-283	2.53177e-279		FDR >=0.01 and <0.05
11	825000	6	475000	250	8.32403e-256	8.60976e-252		FDR >=0.05 and <0.1
11	825000	13	1175000	250	4.23269e-250	4.17177e-246
11	825000	7	815000	233	9.09185e-239	7.92704e-235		FISH pairs
13	1175000	7	815000	219	3.35738e-228	2.68618e-224
11	825000	2	445000	209	9.54297e-223	7.3332e-219
2	445000	8	295000	181	2.46239e-222	1.8763e-218
12	1285000	7	815000	183	2.88116e-220	2.14727e-216
11	825000	12	1285000	192	2.66616e-216	1.92891e-212
2	445000	6	475000	191	4.55041e-209	3.17395e-205
13	1175000	6	475000	207	1.19172e-204	7.96514e-201
6	485000	8	295000	158	1.90041e-203	1.24871e-199
7	815000	8	295000	177	1.68488e-200	1.08868e-196
12	1285000	8	295000	158	1.80465e-200	1.16331e-196
2	445000	7	815000	181	1.15293e-199	7.37952e-196
12	1285000	13	1175000	175	5.30685e-198	3.35723e-194
13	1175000	2	445000	186	2.63043e-197	1.65254e-193
11	825000	8	295000	185	4.40226e-195	2.69715e-191
6	475000	8	295000	176	1.42761e-193	8.61086e-190
11	825000	2	455000	174	1.06334e-186	6.11537e-183
13	1175000	5	445000	209	1.83236e-185	1.04279e-181
1	465000	13	1175000	173	1.67954e-183	9.45927e-180
14	1075000	7	815000	146	4.17521e-181	2.31318e-177
1	465000	7	815000	163	1.20269e-177	6.44026e-174
6	1235000	6	1265000	1575	1.41514e-177	7.54816e-174
12	1285000	6	475000	158	8.56505e-176	4.50664e-172
10	935000	11	825000	147	7.13497e-172	3.66902e-168
11	825000	3	605000	157	3.08671e-170	1.56072e-166
4	1005000	4	1035000	1541	1.01036e-169	5.07097e-166
11	835000	7	815000	146	4.72123e-168	2.34362e-164
1	465000	6	475000	158	2.24896e-165	1.09246e-161
13	1175000	8	295000	159	1.21403e-164	5.81425e-161
5	465000	7	815000	161	6.89483e-163	3.2282e-159
11	825000	5	465000	172	3.28566e-162	1.52005e-158
11	825000	6	485000	153	5.16063e-161	2.34755e-157
11	825000	9	1235000	165	6.83822e-161	3.10031e-157
10	945000	11	825000	174	5.75448e-159	2.57464e-155
1	465000	11	825000	160	8.01005e-158	3.54302e-154
6	475000	9	1235000	155	2.47342e-157	1.08522e-153
11	835000	6	475000	141	5.65091e-156	2.44001e-152
2	455000	7	815000	143	9.09981e-156	3.91677e-152
13	1175000	9	1235000	156	3.38344e-155	1.44715e-151
11	825000	5	445000	191	1.20202e-154	5.10116e-151
10	945000	7	815000	159	1.34957e-154	5.7095e-151
14	1075000	2	445000	122	6.25055e-153	2.62396e-149
12	1285000	2	455000	125	4.43181e-152	1.85188e-148
11	835000	2	445000	128	1.67047e-151	6.92704e-148
6	485000	7	815000	137	3.2891e-151	1.35977e-147
10	945000	6	475000	160	3.81389e-151	1.57194e-147
14	1075000	6	475000	130	4.41927e-151	1.81596e-147
12	1285000	2	445000	131	4.974e-151	2.04082e-147
12	1285000	5	455000	102	8.5622e-151	3.48676e-147
11	825000	12	1275000	167	2.9266e-150	1.1847e-146
11	835000	8	295000	123	2.20381e-148	8.7774e-145
5	445000	6	475000	176	5.02066e-148	1.98801e-144
10	935000	6	475000	125	3.81628e-146	1.47044e-142
12	1275000	6	485000	132	4.96497e-145	1.89161e-141
10	945000	13	1175000	156	2.97549e-142	1.11031e-138
1	465000	8	295000	127	2.4196e-141	8.99179e-138
10	935000	12	1285000	107	3.25733e-141	1.2072e-137
3	595000	6	475000	140	3.40955e-141	1.26189e-137
1	455000	6	475000	115	5.88252e-140	2.15371e-136
13	1175000	7	805000	137	1.77343e-139	6.43228e-136
2	445000	9	1235000	131	3.12886e-139	1.13183e-135
11	825000	14	1085000	169	5.37771e-139	1.9376e-135
12	1275000	6	475000	149	6.88782e-137	2.44606e-133
13	1175000	6	485000	132	1.18912e-136	4.2119e-133
10	945000	2	445000	137	1.24607e-136	4.40216e-133
10	935000	7	815000	116	1.16789e-135	4.06785e-132
5	465000	6	475000	143	1.5944e-133	5.44876e-130
5	445000	7	815000	160	2.88953e-133	9.86239e-130
5	445000	9	1235000	149	3.47176e-133	1.182e-129
12	1365000	12	1395000	1551	1.04919e-132	3.54545e-129
2	455000	8	295000	117	1.64559e-132	5.54705e-129
11	825000	14	1075000	122	1.34271e-130	4.46522e-127
13	1175000	6	495000	160	2.95465e-130	9.80178e-127
12	1285000	9	1235000	117	3.54587e-130	1.17345e-126
3	595000	5	445000	142	4.65455e-129	1.52734e-125
14	1085000	5	445000	166	8.54182e-129	2.79953e-125
10	935000	8	295000	103	2.05558e-128	6.72894e-125
4	635000	6	475000	128	2.41628e-128	7.90019e-125
11	825000	9	1255000	149	1.00974e-127	3.29349e-124
5	455000	7	815000	99	6.59632e-127	2.13363e-123
12	1275000	7	815000	138	1.07355e-126	3.46836e-123
14	1065000	6	475000	116	1.84714e-126	5.96054e-123
1	465000	2	445000	120	3.71097e-126	1.18903e-122
1	465000	7	795000	142	1.23238e-125	3.91638e-122
2	445000	6	485000	113	1.30631e-125	4.14648e-122
11	825000	12	1295000	150	2.9184e-125	9.23122e-122
11	835000	13	1175000	122	5.1615e-125	1.63075e-121
14	1085000	6	475000	149	1.22642e-124	3.86134e-121
4	775000	4	805000	1258	1.95107e-124	6.12162e-121
5	445000	7	795000	173	2.83822e-124	8.89486e-121
11	825000	4	635000	130	1.07316e-122	3.34398e-119
7	815000	9	1235000	127	1.45032e-122	4.50374e-119
1	465000	12	1285000	109	9.01052e-121	2.76026e-117
12	1285000	14	1075000	96	3.0632e-120	9.35213e-117
11	825000	7	805000	127	4.78353e-120	1.45554e-116
3	595000	7	815000	122	5.52143e-120	1.67819e-116
12	1295000	7	815000	135	8.73289e-120	2.64837e-116
2	445000	5	445000	139	1.20504e-119	3.64631e-116
1	465000	9	1235000	115	1.42563e-119	4.30422e-116
2	875000	6	55000	59	2.0619e-119	6.19773e-116
1	455000	7	815000	100	4.16524e-119	1.24649e-115
12	1285000	6	485000	102	6.10163e-119	1.82197e-115
12	1275000	13	1175000	137	3.36966e-118	1.00179e-114
5	245000	5	275000	1531	4.5428e-118	1.34762e-114
13	1175000	7	795000	155	4.18752e-117	1.23015e-113
12	1295000	5	445000	148	6.01286e-117	1.76257e-113
12	1295000	13	1175000	138	1.93932e-116	5.63622e-113
1	455000	12	1285000	88	2.17284e-116	6.30815e-113
11	835000	12	1285000	99	2.26334e-116	6.56388e-113
2	455000	3	595000	106	5.22465e-116	1.50876e-112
13	1175000	2	455000	120	7.65192e-116	2.20736e-112
10	945000	5	445000	144	5.49641e-115	1.57719e-111
11	825000	7	795000	158	4.41141e-114	1.25789e-110
12	1275000	8	295000	117	4.46437e-114	1.27166e-110
10	945000	8	295000	117	9.12885e-114	2.59217e-110
7	815000	9	1245000	94	1.41555e-113	4.01531e-110
11	825000	3	595000	126	1.41934e-113	4.02188e-110
3	605000	6	475000	112	1.70685e-113	4.82653e-110
12	1285000	5	465000	109	8.59178e-113	2.41696e-109
11	825000	5	455000	96	1.54537e-112	4.32938e-109
7	815000	8	305000	86	1.97705e-112	5.52735e-109
7	1105000	7	1135000	826	5.29761e-112	1.47201e-108
6	475000	9	1245000	94	1.09917e-110	3.01112e-107
2	645000	2	675000	1104	1.67539e-110	4.57584e-107
2	455000	6	475000	114	2.64186e-110	7.1866e-107
6	475000	9	1255000	128	3.10264e-110	8.43162e-107
6	475000	7	795000	146	4.10544e-110	1.11456e-106
12	1275000	2	445000	117	1.32843e-109	3.59573e-106
12	1275000	5	445000	139	1.99089e-109	5.37813e-106
10	945000	12	1285000	109	4.87312e-109	1.3125e-105
14	1065000	7	815000	102	4.97696e-109	1.33914e-105
12	1285000	4	645000	76	9.39713e-109	2.51108e-105
13	1175000	5	465000	126	1.80922e-108	4.82036e-105
12	1275000	5	465000	120	1.86706e-108	4.96959e-105
14	1055000	14	1085000	1039	1.99033e-108	5.29252e-105
14	1075000	8	295000	92	2.22913e-108	5.92173e-105
6	475000	7	805000	112	1.58777e-107	4.20562e-104
4	645000	7	815000	83	1.93462e-106	5.04089e-103
12	1285000	9	1245000	80	4.00384e-106	1.04026e-102
10	215000	10	245000	851	1.00442e-105	2.59973e-102
13	1175000	3	605000	108	2.05878e-105	5.31353e-102
11	835000	12	1275000	103	4.5717e-105	1.17545e-101
13	1175000	9	1255000	126	6.5243e-105	1.67591e-101
13	1175000	14	1085000	135	1.08767e-104	2.78604e-101
4	835000	4	865000	944	1.36286e-104	3.48109e-101
13	1175000	3	595000	115	2.52213e-104	6.41205e-101
1	465000	11	835000	95	8.31852e-104	2.10499e-100
13	1175000	14	1075000	100	2.50737e-103	6.28641e-100
7	1245000	7	1275000	1225	4.33126e-103	1.08392e-99
2	445000	7	805000	100	5.06272e-103	1.26581e-99
10	945000	14	1085000	127	6.39223e-103	1.59675e-99
4	635000	7	815000	107	7.43747e-103	1.85445e-99
11	835000	6	485000	89	1.81168e-102	4.49251e-99
10	935000	2	445000	89	3.07018e-102	7.59939e-99
11	825000	14	1065000	104	5.13742e-102	1.26817e-98
5	445000	6	495000	146	6.39062e-102	1.57323e-98
3	595000	8	295000	99	2.47707e-101	6.07056e-98
1	465000	5	445000	121	5.15082e-101	1.2544e-97
2	445000	7	795000	125	1.049e-100	2.55011e-97
5	455000	8	295000	77	1.35715e-100	3.29628e-97
10	945000	7	795000	133	2.54513e-100	6.16514e-97
1	465000	6	485000	94	2.58696e-100	6.26091e-97
1	465000	2	455000	96	3.30411e-100	7.98941e-97
11	825000	4	645000	84	5.82416e-100	1.40207e-96
10	935000	13	1175000	95	2.23702e-98	5.30543e-95
1	465000	14	1075000	86	3.43516e-98	8.12572e-95
10	945000	2	455000	102	5.2633e-98	1.24177e-94
10	935000	3	595000	84	5.80793e-98	1.36789e-94
12	1295000	2	445000	110	6.24537e-98	1.46965e-94
8	295000	9	1235000	99	6.57669e-98	1.54628e-94
6	1335000	6	1365000	303	1.82413e-97	4.2814e-94
14	1075000	6	485000	81	1.98152e-97	4.64279e-94
4	895000	4	925000	1275	4.16362e-97	9.72207e-94
4	635000	7	805000	91	9.38201e-97	2.18508e-93
13	1175000	14	1065000	97	1.41555e-96	3.29118e-93
14	1075000	5	455000	67	2.06564e-96	4.79857e-93
14	1085000	6	495000	133	4.68983e-96	1.08668e-92
2	455000	6	485000	87	9.68559e-95	2.22154e-91
2	315000	2	345000	1030	2.02204e-94	4.62228e-91
1	365000	1	395000	1069	2.22805e-94	5.08894e-91
11	835000	14	1075000	78	2.56084e-94	5.83435e-91
1	465000	12	1275000	103	2.78506e-94	6.33987e-91
10	945000	14	1065000	91	8.51473e-94	1.92539e-90
14	1085000	5	465000	116	8.68976e-94	1.96334e-90
12	1295000	6	475000	117	9.64099e-94	2.17464e-90
12	1295000	9	1235000	106	2.1002e-93	4.72159e-90
13	1175000	4	635000	104	2.52597e-93	5.67411e-90
10	945000	14	1075000	89	3.18156e-93	7.14086e-90
13	1175000	9	1245000	84	3.46532e-93	7.76493e-90
6	495000	9	1255000	121	4.8881e-93	1.08992e-89
5	445000	5	475000	970	5.23875e-93	1.16715e-89
10	965000	10	995000	989	7.75562e-93	1.72365e-89
2	445000	4	645000	71	9.09493e-93	2.01965e-89
3	595000	7	795000	114	3.34131e-92	7.38966e-89
5	465000	6	485000	93	4.54014e-92	1.00085e-88
4	745000	4	775000	814	6.2544e-92	1.37651e-88
14	1085000	9	1235000	110	6.40293e-92	1.40806e-88
3	595000	5	465000	98	6.51346e-92	1.43121e-88
10	935000	11	835000	75	3.05017e-91	6.64316e-88
14	1065000	9	1235000	84	6.07768e-91	1.31737e-87
12	1295000	2	455000	98	1.05878e-90	2.28766e-87
11	835000	7	805000	83	1.47747e-90	3.18474e-87
4	655000	7	815000	99	2.94684e-90	6.33693e-87
12	1295000	14	1075000	88	4.7378e-90	1.01481e-86
6	1225000	6	1265000	825	4.95269e-90	1.06001e-86
8	295000	9	1245000	73	5.8299e-90	1.24677e-86
10	945000	12	1275000	108	1.78116e-89	3.80048e-86
2	445000	5	465000	99	2.61044e-89	5.55209e-86
5	445000	9	1255000	121	4.42802e-89	9.39582e-86
14	1085000	8	315000	113	4.6248e-89	9.80572e-86
11	835000	12	1295000	93	5.02967e-89	1.06475e-85
5	1335000	6	5000	86	6.01477e-89	1.27033e-85
12	1285000	3	605000	81	1.0372e-88	2.1855e-85
1	455000	2	445000	76	1.03861e-88	2.18677e-85
12	1285000	7	805000	84	1.06649e-88	2.24373e-85
4	635000	8	295000	88	1.28707e-88	2.70153e-85
5	455000	6	475000	77	1.50657e-88	3.15981e-85
7	155000	7	185000	861	3.47574e-88	7.24519e-85
7	805000	8	295000	87	3.69728e-88	7.7011e-85
12	1195000	12	1225000	1127	6.70808e-88	1.38978e-84
14	1075000	9	1235000	80	4.09794e-87	8.41958e-84
2	445000	9	1245000	73	4.11565e-87	8.4496e-84
3	605000	9	1235000	85	4.28124e-87	8.78293e-84
14	1075000	7	805000	76	5.18787e-87	1.06349e-83
5	445000	6	485000	102	1.01201e-86	2.06677e-83
1	465000	3	595000	89	1.58167e-86	3.22775e-83
11	845000	6	475000	91	3.38481e-86	6.86112e-83
12	1275000	7	805000	93	3.645e-86	7.37206e-83
14	1735000	14	1765000	1266	4.20254e-86	8.48076e-83
2	445000	5	455000	70	4.85701e-86	9.77972e-83
14	1065000	6	485000	75	5.6873e-86	1.14346e-82
12	1295000	5	465000	104	7.30312e-86	1.46616e-82
3	425000	3	455000	910	1.02566e-85	2.05758e-82
11	835000	5	465000	87	1.13599e-85	2.27723e-82
1	405000	1	435000	950	1.17109e-85	2.34588e-82
14	1055000	5	445000	133	1.26835e-85	2.53882e-82
1	465000	9	1255000	96	1.69736e-85	3.39507e-82
12	1275000	9	1235000	98	1.73563e-85	3.46906e-82
10	945000	11	835000	89	2.17658e-85	4.34722e-82
4	655000	5	445000	106	2.68689e-85	5.35464e-82
4	645000	8	295000	65	3.46352e-85	6.88724e-82
11	825000	8	305000	74	4.28177e-85	8.5019e-82
10	975000	10	1005000	868	4.75252e-85	9.42975e-82
12	1295000	14	1065000	86	4.97263e-85	9.8521e-82
7	795000	9	1235000	111	6.76374e-85	1.3391e-81
12	1285000	5	445000	102	7.12314e-85	1.40821e-81
11	835000	2	455000	79	1.10931e-84	2.18827e-81
12	1165000	12	1195000	1013	1.21674e-84	2.39845e-81
5	445000	8	315000	115	1.9375e-84	3.80819e-81
4	635000	9	1235000	87	2.30865e-84	4.53114e-81
6	635000	6	665000	987	3.92319e-84	7.67782e-81
12	1285000	3	595000	83	7.83817e-84	1.53175e-80
3	605000	7	815000	88	2.08882e-83	4.0616e-80
1	455000	11	825000	82	2.93572e-83	5.69612e-80
13	1175000	14	1055000	121	4.55418e-83	8.79875e-80
4	645000	6	475000	70	7.67273e-83	1.48028e-79
13	1175000	4	645000	71	8.73465e-83	1.68277e-79
14	1075000	2	455000	73	1.91247e-82	3.67404e-79
1	465000	10	945000	94	2.02977e-82	3.89665e-79
11	825000	14	1055000	125	2.54836e-82	4.88532e-79
7	815000	9	1255000	102	8.47628e-82	1.61131e-78
14	1085000	2	445000	102	1.11169e-81	2.11034e-78
10	945000	9	1235000	95	1.81834e-81	3.44456e-78
13	1175000	9	1225000	99	2.61841e-81	4.94296e-78
5	175000	5	205000	902	3.99297e-81	7.52737e-78
3	575000	3	625000	722	6.6657e-81	1.25572e-77
5	465000	9	1235000	92	7.44819e-81	1.40216e-77
7	795000	8	315000	113	9.77362e-81	1.83612e-77
2	465000	7	795000	117	1.92618e-80	3.60616e-77
6	475000	8	305000	68	2.07911e-80	3.8898e-77
14	1065000	8	295000	75	2.61802e-80	4.89131e-77
10	935000	6	485000	69	3.56879e-80	6.64938e-77
11	835000	9	1235000	80	4.80448e-80	8.93949e-77
7	555000	7	585000	459	5.71808e-80	1.06321e-76
2	455000	9	1245000	65	5.83715e-80	1.08461e-76
12	1275000	14	1085000	107	7.21723e-80	1.3383e-76
8	1175000	8	1205000	661	7.61031e-80	1.41023e-76
7	805000	9	1235000	83	7.66816e-80	1.41998e-76
6	485000	9	1235000	81	9.9103e-80	1.83268e-76
4	655000	6	475000	93	9.92233e-80	1.83366e-76
10	935000	14	1075000	64	1.49621e-79	2.75939e-76
9	225000	9	255000	890	1.78903e-79	3.29273e-76
10	945000	5	465000	97	2.5864e-79	4.75388e-76
12	1275000	14	1075000	79	3.11271e-79	5.71738e-76
10	945000	4	645000	66	4.34386e-79	7.97335e-76
2	445000	9	1255000	93	5.49308e-79	1.00624e-75
14	3015000	14	3045000	842	6.19135e-79	1.13187e-75
12	1295000	4	655000	91	7.38838e-79	1.3498e-75
7	785000	7	835000	705	1.57058e-78	2.85589e-75
12	1285000	14	1065000	71	1.6111e-78	2.92566e-75
3	605000	8	295000	77	1.9984e-78	3.62414e-75
2	445000	3	605000	79	3.1672e-78	5.73231e-75
11	825000	2	465000	109	1.24804e-77	2.24835e-74
12	1275000	3	605000	83	1.37866e-77	2.48203e-74
2	455000	5	445000	97	1.41003e-77	2.53515e-74
3	935000	3	965000	606	1.47261e-77	2.6459e-74
12	1475000	12	1505000	1005	1.53508e-77	2.75634e-74
2	455000	7	795000	98	1.80017e-77	3.23019e-74
8	1105000	8	1135000	620	1.8707e-77	3.35454e-74
11	825000	6	495000	118	2.48806e-77	4.45277e-74
7	545000	7	575000	270	2.53084e-77	4.52636e-74
10	945000	4	635000	87	3.58987e-77	6.41197e-74
6	485000	9	1245000	62	4.20874e-77	7.5075e-74
8	1185000	8	1215000	1050	4.33034e-77	7.71936e-74
12	1275000	9	1245000	70	4.78043e-77	8.5161e-74
1	455000	13	1175000	75	1.05568e-76	1.87573e-73
5	195000	5	225000	813	1.06096e-76	1.88388e-73
14	1085000	7	785000	123	1.06362e-76	1.88738e-73
14	1075000	5	445000	86	1.24558e-76	2.20882e-73
1	465000	9	1245000	65	1.66047e-76	2.93689e-73
10	935000	5	465000	74	2.41496e-76	4.26029e-73
11	1655000	11	1685000	1062	2.69126e-76	4.74465e-73
11	825000	3	585000	89	4.889e-76	8.58028e-73
10	945000	3	595000	88	7.87088e-76	1.37691e-72
4	755000	4	785000	761	8.08125e-76	1.41281e-72
3	595000	6	485000	76	1.5757e-75	2.74237e-72
4	635000	5	445000	96	2.44898e-75	4.25138e-72
8	335000	8	365000	937	2.74533e-75	4.76279e-72
11	825000	9	1245000	74	3.20452e-75	5.54882e-72
5	1245000	5	1275000	782	3.69123e-75	6.38345e-72
4	785000	4	815000	781	4.90146e-75	8.46562e-72
12	1285000	4	635000	75	5.01657e-75	8.65892e-72
3	75000	3	115000	558	5.81094e-75	1.00173e-71
8	1175000	8	1215000	934	8.37568e-75	1.44021e-71
10	965000	10	1005000	797	1.13019e-74	1.93971e-71
5	445000	8	295000	98	1.19122e-74	2.04316e-71
1	465000	4	645000	59	1.63865e-74	2.80351e-71
12	1265000	12	1295000	841	1.64701e-74	2.81604e-71
2	435000	2	465000	458	1.65278e-74	2.82414e-71
10	925000	7	815000	84	2.58881e-74	4.41522e-71
12	485000	12	515000	816	2.9545e-74	5.03261e-71
6	1115000	6	1145000	902	3.1879e-74	5.42677e-71
12	1295000	7	795000	111	6.06122e-74	1.02666e-70
14	1055000	6	475000	110	6.48821e-74	1.0983e-70
14	1065000	9	1245000	57	7.46353e-74	1.26026e-70
3	595000	9	1235000	81	7.63775e-74	1.28888e-70
11	835000	4	635000	72	1.00108e-73	1.68724e-70
2	455000	7	805000	74	1.81813e-73	3.05487e-70
11	1855000	11	1885000	726	1.82712e-73	3.06807e-70
10	945000	3	605000	80	2.0235e-73	3.39155e-70
2	465000	5	445000	109	2.04393e-73	3.42369e-70
10	935000	5	445000	82	2.22136e-73	3.71859e-70
13	1175000	5	455000	68	2.72763e-73	4.56329e-70
14	1075000	5	465000	73	2.89185e-73	4.83505e-70
2	445000	4	635000	79	3.51883e-73	5.87251e-70
4	55000	4	1165000	116	4.16896e-73	6.94898e-70
12	1415000	12	1445000	1059	6.88797e-73	1.14531e-69
1	455000	8	295000	64	7.77501e-73	1.29043e-69
14	3075000	14	3105000	780	9.58664e-73	1.59014e-69
14	325000	14	355000	898	9.60391e-73	1.59204e-69
12	1295000	6	485000	82	9.92293e-73	1.64392e-69
7	1165000	7	1205000	993	1.03125e-72	1.70741e-69
11	855000	5	475000	112	1.66572e-72	2.74786e-69
10	945000	6	495000	103	2.90937e-72	4.78393e-69
2	445000	3	595000	80	4.18267e-72	6.86251e-69
13	2275000	13	2305000	616	5.25125e-72	8.59499e-69
12	1275000	2	455000	82	5.62805e-72	9.20616e-69
14	485000	14	515000	1119	6.43598e-72	1.05214e-68
14	1055000	9	1235000	97	9.28576e-72	1.51076e-68
12	1295000	4	635000	84	9.62456e-72	1.56401e-68
10	945000	7	805000	82	1.0097e-71	1.63784e-68
2	445000	4	655000	79	1.06903e-71	1.73305e-68
11	835000	5	455000	56	1.50725e-71	2.44057e-68
7	245000	7	275000	814	1.95582e-71	3.16313e-68
8	45000	8	1405000	108	2.22894e-71	3.6027e-68
11	825000	2	435000	83	2.71848e-71	4.38614e-68
12	1275000	9	1255000	92	5.20202e-71	8.35849e-68
6	1225000	6	1255000	566	5.53055e-71	8.88113e-68
3	605000	6	495000	85	7.74461e-71	1.24072e-67
10	945000	12	1295000	94	8.57608e-71	1.37312e-67
2	455000	5	465000	79	1.13805e-70	1.82107e-67
2	465000	6	495000	103	1.76138e-70	2.81354e-67
12	1275000	14	1065000	74	1.92321e-70	3.06843e-67
10	935000	2	455000	64	2.00895e-70	3.20333e-67
11	835000	4	645000	53	2.23046e-70	3.55238e-67
12	1265000	5	445000	118	2.30686e-70	3.67191e-67
8	115000	8	145000	1086	2.59319e-70	4.12526e-67
5	465000	9	1255000	89	2.66592e-70	4.23849e-67
7	805000	9	1245000	59	2.6965e-70	4.2846e-67
11	825000	4	655000	90	2.79793e-70	4.44317e-67
14	1055000	7	795000	119	3.88739e-70	6.16964e-67
13	1155000	5	445000	102	5.04049e-70	7.98575e-67
1	465000	10	935000	66	6.0626e-70	9.58835e-67
12	1285000	14	1085000	85	6.23044e-70	9.84806e-67
12	1265000	7	795000	119	7.82441e-70	1.23272e-66
10	935000	9	1235000	67	8.45159e-70	1.33048e-66
7	1275000	7	1305000	1118	1.12499e-69	1.76487e-66
12	1295000	6	495000	102	2.80769e-69	4.36939e-66
6	1205000	6	1235000	732	2.86464e-69	4.45547e-66
2	425000	2	465000	635	3.18389e-69	4.94918e-66
3	605000	5	445000	86	3.24301e-69	5.03821e-66
14	1075000	3	595000	66	3.70586e-69	5.74414e-66
7	555000	7	595000	378	3.89936e-69	6.04062e-66
12	1395000	12	1435000	1014	4.23446e-69	6.55229e-66
6	495000	9	1235000	93	4.57999e-69	7.08292e-66
14	1085000	9	1255000	97	4.85341e-69	7.5015e-66
7	845000	7	875000	962	1.0761e-68	1.6604e-65
14	1065000	7	795000	82	2.10652e-68	3.23199e-65
7	415000	7	445000	839	2.44424e-68	3.74803e-65
5	1255000	5	1285000	488	2.52242e-68	3.86573e-65
1	465000	7	805000	73	2.77886e-68	4.25396e-65
7	135000	7	175000	549	2.93781e-68	4.49475e-65
2	345000	2	375000	1024	3.04042e-68	4.64913e-65
14	715000	14	745000	744	3.09408e-68	4.72852e-65
14	1075000	4	635000	64	3.1039e-68	4.74086e-65
10	945000	4	655000	81	4.29729e-68	6.54526e-65
11	845000	12	1295000	76	5.39619e-68	8.20063e-65
14	1075000	7	795000	80	5.71067e-68	8.67371e-65
7	555000	7	605000	444	6.86593e-68	1.04167e-64
4	225000	4	255000	1190	7.38996e-68	1.11993e-64
3	595000	9	1245000	59	7.66474e-68	1.16093e-64
14	1085000	7	815000	97	7.75042e-68	1.17325e-64
12	1755000	12	1785000	742	7.95922e-68	1.20419e-64
11	1955000	11	1985000	767	8.17874e-68	1.23671e-64
5	465000	7	795000	100	8.54121e-68	1.2908e-64
12	1295000	14	1085000	98	9.01425e-68	1.36154e-64
14	1055000	9	1255000	100	1.0645e-67	1.60607e-64
9	425000	9	455000	1015	1.37761e-67	2.07501e-64
5	1235000	5	1265000	567	1.51905e-67	2.28503e-64
4	1005000	4	1105000	443	2.57824e-67	3.86847e-64
6	1265000	6	1295000	487	2.78663e-67	4.17883e-64
12	1275000	6	495000	98	3.72871e-67	5.57928e-64
12	1285000	7	795000	88	4.80603e-67	7.17548e-64
5	445000	7	805000	88	4.82886e-67	7.20563e-64
12	355000	12	385000	592	4.90594e-67	7.31662e-64
14	1075000	9	1245000	52	7.50738e-67	1.11597e-63
13	185000	13	215000	683	8.09424e-67	1.20189e-63
5	475000	7	785000	110	8.36485e-67	1.24139e-63
1	455000	10	945000	65	9.13118e-67	1.35438e-63
11	855000	13	1175000	107	9.77613e-67	1.44846e-63
11	855000	14	1085000	109	1.14432e-66	1.6927e-63
5	235000	5	265000	962	1.38954e-66	2.05208e-63
3	415000	3	445000	820	1.62314e-66	2.39317e-63
2	415000	2	475000	604	2.14355e-66	3.15703e-63
11	825000	8	285000	81	2.20667e-66	3.24825e-63
7	1195000	7	1225000	695	3.0141e-66	4.42721e-63
4	655000	9	1225000	74	3.33489e-66	4.89575e-63
12	1265000	6	495000	110	3.44826e-66	5.05945e-63
5	455000	9	1245000	46	3.51931e-66	5.16091e-63
13	1175000	4	655000	83	1.16946e-65	1.7076e-62
12	1295000	9	1255000	89	1.18434e-65	1.7284e-62
12	1295000	3	595000	81	1.19737e-65	1.74648e-62
14	1085000	4	635000	83	1.49807e-65	2.17924e-62
13	1155000	6	475000	89	1.66474e-65	2.42039e-62
10	945000	6	485000	75	2.2402e-65	3.25083e-62
1	465000	5	465000	78	2.2395e-65	3.25083e-62
7	1175000	7	1205000	928	2.56306e-65	3.71654e-62
2	445000	8	305000	54	2.80023e-65	4.05612e-62
7	795000	7	835000	729	2.82916e-65	4.09586e-62
3	455000	3	495000	753	3.38099e-65	4.88695e-62
12	1275000	4	645000	57	3.59356e-65	5.18593e-62
5	465000	8	295000	77	7.67797e-65	1.10626e-61
6	495000	8	315000	94	7.69406e-65	1.10799e-61
10	935000	9	1245000	50	1.14138e-64	1.63932e-61
11	845000	5	445000	81	1.26738e-64	1.81837e-61
12	1385000	12	1415000	938	1.4046e-64	2.01206e-61
3	605000	7	795000	83	1.41636e-64	2.02783e-61
11	835000	5	445000	82	1.7395e-64	2.48656e-61
14	1075000	4	645000	47	1.97018e-64	2.81335e-61
5	475000	7	795000	105	2.05817e-64	2.93746e-61
10	935000	12	1275000	67	2.13385e-64	3.04228e-61
5	465000	7	805000	74	2.73631e-64	3.89306e-61
11	815000	13	1175000	95	2.95293e-64	4.19685e-61
3	625000	5	445000	113	4.29967e-64	6.09818e-61
14	1085000	7	805000	81	4.56434e-64	6.47018e-61
1	165000	1	195000	1149	5.07987e-64	7.19347e-61
2	455000	9	1235000	71	5.20422e-64	7.36572e-61
10	945000	5	455000	59	6.70638e-64	9.47208e-61
11	275000	11	305000	929	8.1542e-64	1.14931e-60
11	835000	9	1245000	53	8.76094e-64	1.23355e-60
12	1285000	8	305000	50	9.21489e-64	1.29612e-60
11	845000	13	1175000	75	1.05557e-63	1.48165e-60
14	1055000	7	785000	115	1.14757e-63	1.60665e-60
10	935000	14	1065000	55	1.15219e-63	1.61228e-60
14	1085000	5	475000	97	1.37407e-63	1.9198e-60
4	415000	4	445000	807	1.39515e-63	1.94826e-60
3	945000	3	975000	640	1.41916e-63	1.98077e-60
14	1055000	6	495000	107	1.46222e-63	2.03982e-60
1	465000	4	655000	71	1.48507e-63	2.07063e-60
9	705000	9	735000	671	1.50121e-63	2.09207e-60
13	1175000	3	585000	76	1.86072e-63	2.59042e-60
2	465000	7	785000	103	1.97179e-63	2.74364e-60
1	465000	14	1085000	84	2.18919e-63	3.04303e-60
7	125000	7	155000	691	2.48609e-63	3.4522e-60
12	2045000	12	2075000	639	3.68443e-63	5.098e-60
3	625000	4	625000	95	4.11948e-63	5.69128e-60
13	1985000	13	2015000	768	5.39887e-63	7.43993e-60
4	655000	8	295000	70	6.63901e-63	9.13966e-60
10	945000	9	1255000	85	8.06191e-63	1.10817e-59
7	795000	8	325000	103	8.45253e-63	1.16128e-59
12	1275000	7	795000	98	9.33693e-63	1.28213e-59
11	1475000	11	1505000	926	9.88287e-63	1.35642e-59
7	1205000	7	1245000	785	9.9534e-63	1.36541e-59
14	1085000	7	795000	106	1.03833e-62	1.42151e-59
6	495000	7	795000	109	1.07908e-62	1.47656e-59
12	1275000	3	595000	77	1.39249e-62	1.90064e-59
10	575000	10	605000	752	1.76243e-62	2.40195e-59
2	465000	9	1255000	86	1.93077e-62	2.63007e-59
12	1275000	4	635000	75	2.04909e-62	2.78845e-59
10	1295000	10	1325000	801	2.80414e-62	3.80262e-59
6	375000	6	405000	867	3.87055e-62	5.24351e-59
6	495000	7	785000	111	5.11603e-62	6.92389e-59
1	455000	4	645000	43	5.19492e-62	7.02716e-59
6	215000	6	245000	524	5.4514e-62	7.37044e-59
4	655000	9	1235000	71	6.83594e-62	9.23319e-59
14	1085000	6	485000	77	8.17924e-62	1.10311e-58
3	145000	3	175000	674	8.46571e-62	1.14118e-58
1	435000	3	625000	106	9.06232e-62	1.2204e-58
10	945000	11	845000	70	9.35792e-62	1.25896e-58
14	1085000	3	575000	97	9.83548e-62	1.32255e-58
3	785000	3	815000	704	1.42087e-61	1.9059e-58
6	475000	8	285000	73	1.43579e-61	1.92496e-58
10	945000	9	1225000	78	1.72823e-61	2.31361e-58
8	295000	9	1255000	76	1.75665e-61	2.35051e-58
6	1255000	6	1285000	492	1.93259e-61	2.58338e-58
11	815000	9	1255000	87	1.95898e-61	2.61737e-58
10	1195000	10	1225000	884	2.49649e-61	3.32899e-58
13	1175000	5	475000	93	2.78249e-61	3.7031e-58
13	1165000	7	815000	51	3.08666e-61	4.10591e-58
7	795000	8	295000	87	3.4318e-61	4.56055e-58
7	385000	7	415000	966	3.55147e-61	4.71498e-58
3	595000	7	805000	67	3.66969e-61	4.86955e-58
2	535000	2	565000	721	3.75723e-61	4.98328e-58
10	1105000	10	1135000	742	3.84063e-61	5.09141e-58
12	2035000	12	2065000	795	4.01708e-61	5.32274e-58
11	1875000	11	1905000	646	4.59848e-61	6.09014e-58
9	545000	9	575000	767	4.84922e-61	6.41597e-58
4	635000	5	465000	72	5.00432e-61	6.61795e-58
11	855000	6	495000	106	6.73614e-61	8.89091e-58
2	465000	4	635000	75	6.85167e-61	9.03902e-58
12	1635000	12	1665000	621	7.21869e-61	9.51859e-58
11	815000	6	495000	96	7.49263e-61	9.87501e-58
14	1395000	14	1425000	982	8.04557e-61	1.05986e-57
1	435000	2	415000	112	8.09202e-61	1.06547e-57
6	125000	6	155000	505	8.57767e-61	1.12886e-57
12	1295000	8	295000	77	8.74099e-61	1.1498e-57
14	1065000	2	445000	63	9.64652e-61	1.26708e-57
14	1085000	2	435000	73	1.11641e-60	1.46429e-57
1	455000	5	455000	44	1.14232e-60	1.49683e-57
10	925000	11	825000	79	1.20469e-60	1.57704e-57
6	485000	7	805000	63	1.38967e-60	1.8157e-57
6	345000	6	375000	807	1.79577e-60	2.3418e-57
8	315000	9	1235000	76	2.08442e-60	2.71562e-57
11	815000	14	1085000	93	2.23992e-60	2.9168e-57
2	335000	2	365000	944	2.42942e-60	3.15904e-57
12	1265000	13	1175000	99	3.07859e-60	3.99553e-57
4	55000	4	1175000	89	3.233e-60	4.19193e-57
4	635000	9	1255000	73	3.31686e-60	4.29861e-57
13	1155000	7	815000	82	3.42164e-60	4.43019e-57
6	5000	6	1365000	88	5.18523e-60	6.70084e-57
11	855000	6	475000	98	5.21073e-60	6.73059e-57
4	625000	4	655000	468	8.27151e-60	1.06487e-56
8	425000	8	465000	466	1.02363e-59	1.31533e-56
13	1175000	2	435000	71	1.13773e-59	1.46126e-56
11	855000	12	1275000	94	1.18269e-59	1.51828e-56
1	455000	4	635000	54	1.3017e-59	1.67027e-56
3	595000	5	475000	78	1.58077e-59	2.0255e-56
6	145000	6	175000	676	1.75148e-59	2.24002e-56
5	175000	5	215000	510	1.77161e-59	2.2647e-56
14	1085000	2	455000	77	1.88344e-59	2.40539e-56
4	635000	7	795000	83	1.93547e-59	2.46952e-56
11	855000	5	445000	108	1.99831e-59	2.54732e-56
4	1005000	4	1045000	456	2.41258e-59	3.0682e-56
4	505000	4	535000	817	2.4603e-59	3.12744e-56
2	465000	7	815000	84	3.37623e-59	4.28772e-56
11	855000	7	785000	112	3.71986e-59	4.72191e-56
10	915000	14	1085000	81	4.40471e-59	5.58082e-56
12	125000	12	155000	490	4.54678e-59	5.75815e-56
13	255000	13	285000	709	4.7968e-59	6.06913e-56
5	455000	7	805000	50	5.7858e-59	7.31365e-56
10	925000	7	785000	83	6.10575e-59	7.71451e-56
8	225000	8	255000	1031	6.97046e-59	8.79888e-56
11	865000	11	895000	752	9.96171e-59	1.25602e-55
1	455000	2	455000	53	9.95941e-59	1.25602e-55
5	365000	5	395000	999	1.01676e-58	1.28109e-55
1	455000	7	805000	53	1.0566e-58	1.33067e-55
7	135000	7	185000	609	1.17139e-58	1.47388e-55
4	485000	4	515000	807	1.21544e-58	1.52859e-55
11	1195000	11	1225000	899	1.38734e-58	1.74317e-55
1	455000	11	835000	51	1.81272e-58	2.27449e-55
14	1085000	8	295000	79	1.82538e-58	2.28933e-55
14	1085000	2	465000	89	1.89849e-58	2.37882e-55
7	1225000	7	1275000	793	2.1781e-58	2.72666e-55
11	855000	11	885000	991	2.2052e-58	2.75932e-55
13	2575000	13	2605000	767	2.5896e-58	3.23676e-55
6	485000	8	315000	68	2.58914e-58	3.23676e-55
11	855000	9	1235000	86	2.83054e-58	3.53366e-55
14	1065000	4	635000	58	3.88503e-58	4.84343e-55
13	1165000	6	475000	50	4.0683e-58	5.06727e-55
13	1175000	2	465000	87	4.58357e-58	5.70123e-55
5	475000	6	475000	88	4.59312e-58	5.7105e-55
3	595000	9	1255000	73	4.69439e-58	5.83374e-55
14	1065000	5	465000	63	5.00939e-58	6.21666e-55
12	1405000	12	1435000	872	6.3734e-58	7.89859e-55
11	625000	11	655000	899	6.63359e-58	8.21731e-55
3	915000	3	965000	469	6.6373e-58	8.21817e-55
12	35000	12	2245000	86	7.06319e-58	8.74151e-55
4	665000	5	445000	94	7.77116e-58	9.60896e-55
4	655000	8	315000	71	9.25752e-58	1.14261e-54
3	615000	5	445000	80	9.68479e-58	1.19426e-54
13	105000	13	135000	731	9.74096e-58	1.20064e-54
3	465000	3	495000	653	1.01564e-57	1.25127e-54
14	1055000	3	615000	79	1.01854e-57	1.25428e-54
12	1275000	13	1155000	79	1.2289e-57	1.50991e-54
10	925000	7	795000	80	1.26475e-57	1.55325e-54
4	145000	4	175000	700	1.27388e-57	1.56377e-54
10	925000	5	445000	79	1.47348e-57	1.80552e-54
12	1385000	12	1435000	691	1.52358e-57	1.86524e-54
13	1155000	2	445000	74	1.60161e-57	1.95901e-54
13	1155000	7	795000	91	2.06746e-57	2.5254e-54
2	465000	8	295000	74	2.10917e-57	2.5752e-54
14	1065000	2	455000	57	2.13958e-57	2.61115e-54
8	115000	8	155000	670	2.20786e-57	2.69327e-54
5	205000	5	235000	901	2.24431e-57	2.73651e-54
14	1055000	2	465000	92	2.36993e-57	2.88839e-54
8	1115000	8	1145000	756	2.66994e-57	3.24821e-54
10	925000	6	475000	72	2.74627e-57	3.33808e-54
14	2135000	14	2165000	780	2.97875e-57	3.61904e-54
1	465000	8	285000	62	3.02884e-57	3.67825e-54
11	855000	7	795000	107	3.44844e-57	4.18595e-54
13	1165000	5	445000	53	3.85474e-57	4.67706e-54
6	475000	7	825000	66	3.85654e-57	4.67716e-54
5	425000	5	475000	561	3.98866e-57	4.83308e-54
2	425000	2	475000	515	4.17101e-57	5.05178e-54
13	1735000	13	1765000	548	4.30981e-57	5.21525e-54
3	575000	5	475000	90	4.4884e-57	5.42654e-54
10	935000	5	455000	44	4.79872e-57	5.79913e-54
6	1045000	6	1075000	849	6.50763e-57	7.85385e-54
6	795000	6	825000	689	6.53847e-57	7.88756e-54
11	825000	13	1155000	86	7.84598e-57	9.46066e-54
7	1115000	7	1275000	427	8.78406e-57	1.05684e-53
11	145000	11	175000	438	9.09866e-57	1.09275e-53
14	2505000	14	2535000	752	1.02127e-56	1.22601e-53
11	835000	3	595000	61	1.07198e-56	1.28632e-53
5	235000	5	275000	1101	1.1e-56	1.31935e-53
12	1285000	13	1165000	43	1.15412e-56	1.38366e-53
3	605000	5	465000	65	1.20985e-56	1.44919e-53
2	455000	4	635000	62	1.24685e-56	1.49286e-53
1	455000	14	1075000	47	1.37255e-56	1.64191e-53
14	1085000	2	425000	92	1.41367e-56	1.69036e-53
3	605000	7	805000	59	1.70737e-56	2.03797e-53
10	955000	10	985000	560	2.0754e-56	2.47509e-53
8	1085000	8	1115000	813	2.09123e-56	2.49287e-53
11	1835000	11	1865000	621	2.20664e-56	2.62929e-53
1	465000	5	455000	50	2.42787e-56	2.89163e-53
2	425000	8	275000	91	2.45013e-56	2.91687e-53
11	825000	13	1165000	51	2.61872e-56	3.1162e-53
8	435000	8	465000	436	2.95752e-56	3.51783e-53
9	215000	9	245000	589	3.00783e-56	3.5761e-53
2	435000	5	445000	73	3.19028e-56	3.79137e-53
3	935000	3	975000	630	3.5958e-56	4.27143e-53
12	1445000	12	1475000	1195	3.70132e-56	4.39486e-53
2	415000	2	485000	556	3.98313e-56	4.72535e-53
14	1385000	14	1425000	1060	4.06058e-56	4.81513e-53
2	455000	4	645000	46	4.50201e-56	5.33626e-53
3	605000	4	655000	60	4.58682e-56	5.43442e-53
7	445000	7	475000	517	4.62526e-56	5.47757e-53
4	385000	4	415000	907	4.63997e-56	5.4926e-53
4	665000	9	1235000	75	5.83838e-56	6.89324e-53
5	445000	7	785000	108	6.16283e-56	7.26999e-53
1	465000	4	635000	64	6.24455e-56	7.3632e-53
8	285000	8	315000	405	7.74439e-56	9.12777e-53
12	1265000	14	1055000	101	9.02162e-56	1.06102e-52
3	915000	3	975000	557	9.14912e-56	1.07555e-52
2	465000	6	475000	83	9.97106e-56	1.17167e-52
3	595000	4	645000	47	1.05941e-55	1.24434e-52
4	255000	4	295000	967	1.0919e-55	1.28194e-52
5	475000	8	315000	81	1.14454e-55	1.34317e-52
13	2765000	13	2815000	597	1.37484e-55	1.61065e-52
11	1935000	11	1965000	470	1.48714e-55	1.74147e-52
11	1335000	11	1365000	660	1.52107e-55	1.78044e-52
1	435000	7	785000	103	1.53465e-55	1.79556e-52
12	1265000	14	1085000	96	1.6152e-55	1.88899e-52
11	835000	7	795000	75	1.87157e-55	2.18694e-52
1	465000	4	625000	70	1.91121e-55	2.23229e-52
4	655000	7	805000	62	1.93256e-55	2.25627e-52
1	465000	13	1165000	44	1.95262e-55	2.27871e-52
14	1055000	3	575000	95	1.98903e-55	2.3202e-52
12	1275000	5	455000	53	2.42724e-55	2.82895e-52
1	315000	1	345000	589	2.51266e-55	2.92599e-52
6	645000	6	675000	594	2.62518e-55	3.05572e-52
3	895000	3	925000	626	2.70354e-55	3.14559e-52
7	1205000	7	1275000	928	2.78868e-55	3.24326e-52
6	475000	9	1225000	75	2.80147e-55	3.25674e-52
7	1215000	7	1275000	695	2.9175e-55	3.39018e-52
4	765000	4	805000	647	3.2288e-55	3.74712e-52
2	455000	3	605000	58	3.49234e-55	4.04434e-52
3	565000	3	625000	543	3.50938e-55	4.06234e-52
11	835000	14	1085000	70	4.29796e-55	4.96883e-52
3	755000	3	785000	793	4.37024e-55	5.05024e-52
2	185000	2	215000	818	4.99006e-55	5.76161e-52
7	1135000	7	1205000	617	5.21037e-55	6.01343e-52
11	35000	11	2025000	82	5.7506e-55	6.63129e-52
4	1005000	4	1095000	488	5.81333e-55	6.7008e-52
9	1295000	9	1325000	721	6.5428e-55	7.53843e-52
3	575000	7	795000	97	7.51386e-55	8.64994e-52
1	465000	9	1225000	66	1.02548e-54	1.17804e-51
13	1155000	14	1055000	86	1.07506e-54	1.23447e-51
4	645000	7	795000	56	1.15258e-54	1.32126e-51
11	815000	11	855000	698	1.16788e-54	1.33822e-51
4	985000	4	1125000	177	1.65546e-54	1.89454e-51
11	855000	14	1055000	101	2.00316e-54	2.28956e-51
8	1085000	8	1125000	646	2.3421e-54	2.67583e-51
1	465000	4	665000	72	2.91401e-54	3.32365e-51
5	445000	7	835000	91	3.1679e-54	3.61022e-51
7	1165000	7	1195000	776	3.19227e-54	3.63645e-51
12	1235000	12	1265000	803	3.43189e-54	3.90324e-51
13	1175000	3	625000	94	3.60699e-54	4.1003e-51
9	515000	9	545000	751	3.69129e-54	4.19438e-51
12	1295000	9	1245000	55	3.82571e-54	4.34349e-51
2	475000	5	445000	89	4.10621e-54	4.66001e-51
7	795000	9	1255000	89	4.6262e-54	5.24575e-51
11	1845000	11	1875000	538	4.63237e-54	5.25056e-51
4	645000	5	445000	55	4.72338e-54	5.35148e-51
11	845000	2	445000	60	5.47189e-54	6.18921e-51
12	1275000	4	655000	69	5.9105e-54	6.68254e-51
2	415000	5	445000	109	5.93897e-54	6.71194e-51
1	465000	12	1265000	79	6.67969e-54	7.54593e-51
2	435000	6	475000	65	6.91381e-54	7.80718e-51
12	1695000	12	1725000	362	7.33804e-54	8.28278e-51
1	465000	11	855000	80	7.50947e-54	8.47277e-51
10	935000	4	635000	53	7.76521e-54	8.75769e-51
10	945000	9	1245000	54	7.78439e-54	8.77568e-51
11	845000	7	815000	64	8.36325e-54	9.41655e-51
13	1185000	9	1255000	69	1.11354e-53	1.25119e-50
6	475000	8	315000	78	1.11379e-53	1.25119e-50
1	275000	1	305000	729	1.20893e-53	1.35725e-50
7	1155000	7	1185000	628	1.21619e-53	1.36484e-50
1	455000	3	595000	51	1.26517e-53	1.41923e-50
14	1055000	4	655000	77	1.27994e-53	1.4352e-50
3	605000	9	1255000	64	1.37603e-53	1.54167e-50
14	3255000	9	65000	30	1.4128e-53	1.58222e-50
4	665000	9	1255000	78	1.52737e-53	1.70771e-50
7	1255000	7	1285000	706	1.56768e-53	1.75207e-50
12	1395000	12	1425000	981	1.70801e-53	1.90812e-50
1	465000	6	495000	77	1.92165e-53	2.1459e-50
13	1175000	8	305000	51	2.09271e-53	2.33406e-50
7	1115000	7	1165000	589	2.47819e-53	2.76059e-50
12	1275000	4	665000	78	2.53281e-53	2.82028e-50
12	1295000	4	625000	76	2.81901e-53	3.13768e-50
1	465000	12	1295000	71	3.06438e-53	3.4094e-50
8	1135000	8	1175000	716	3.37821e-53	3.75396e-50
14	1075000	3	605000	51	3.58407e-53	3.98108e-50
12	1275000	14	1055000	86	3.83875e-53	4.26223e-50
13	1185000	5	445000	78	4.09498e-53	4.54487e-50
11	1215000	11	1245000	637	4.21267e-53	4.67359e-50
12	1355000	12	1395000	828	5.88622e-53	6.50637e-50
3	605000	6	485000	55	6.16517e-53	6.81194e-50
7	415000	7	455000	549	6.35661e-53	7.02061e-50
2	415000	6	495000	104	6.77964e-53	7.48175e-50
11	855000	3	625000	101	7.1393e-53	7.86908e-50
10	1055000	10	1085000	701	7.37411e-53	8.12459e-50
5	325000	5	355000	752	7.76501e-53	8.54836e-50
4	635000	9	1245000	48	8.14133e-53	8.95539e-50
2	555000	2	585000	729	9.62387e-53	1.05819e-49
5	165000	5	195000	693	1.06534e-52	1.1695e-49
14	1075000	9	1255000	59	1.14086e-52	1.2519e-49
2	415000	7	785000	112	1.17319e-52	1.28686e-49
12	1265000	9	1225000	79	1.19384e-52	1.30898e-49
5	1345000	6	5000	44	1.22018e-52	1.33732e-49
11	825000	12	1265000	95	1.22224e-52	1.33903e-49
10	1345000	10	1375000	581	1.30949e-52	1.43347e-49
13	1165000	8	295000	42	1.49015e-52	1.63058e-49
4	645000	9	1235000	46	1.5868e-52	1.73494e-49
14	1055000	7	835000	88	1.62931e-52	1.77927e-49
2	495000	2	525000	608	1.71958e-52	1.87634e-49
12	1025000	12	1055000	714	1.79993e-52	1.96324e-49
1	435000	11	855000	96	1.9726e-52	2.14898e-49
1	455000	3	605000	47	2.07821e-52	2.26223e-49
12	1365000	12	1405000	777	2.28767e-52	2.48824e-49
7	785000	9	1235000	83	2.30697e-52	2.50823e-49
1	525000	1	555000	325	2.36218e-52	2.56724e-49
14	1065000	3	595000	55	2.37309e-52	2.57806e-49
4	1135000	4	1165000	274	2.63699e-52	2.86361e-49
6	285000	6	315000	578	2.69351e-52	2.92383e-49
4	565000	4	605000	151	2.89102e-52	3.13697e-49
6	485000	9	1255000	64	2.95164e-52	3.20147e-49
11	475000	11	505000	695	3.0894e-52	3.34688e-49
4	655000	6	485000	58	3.197e-52	3.46208e-49
13	1155000	6	495000	82	3.19867e-52	3.46251e-49
11	1885000	11	1915000	459	3.30119e-52	3.57206e-49
12	1265000	5	475000	90	3.43439e-52	3.71471e-49
5	465000	6	495000	81	3.64291e-52	3.93868e-49
2	425000	5	445000	93	3.70962e-52	4.00921e-49
7	795000	7	825000	480	3.74745e-52	4.04689e-49
11	815000	5	445000	90	4.53551e-52	4.88821e-49
10	945000	8	305000	48	4.62662e-52	4.98443e-49
3	415000	3	455000	722	4.7727e-52	5.13977e-49
7	1125000	7	1155000	487	5.05555e-52	5.44007e-49
4	635000	6	485000	57	5.19727e-52	5.58815e-49
12	1425000	12	1455000	764	5.67343e-52	6.09771e-49
3	335000	3	365000	690	5.91753e-52	6.35505e-49
14	1085000	4	625000	79	6.17425e-52	6.62813e-49
5	475000	6	455000	83	6.23446e-52	6.69012e-49
2	475000	2	505000	736	6.37564e-52	6.83893e-49
3	915000	3	945000	701	6.83449e-52	7.32245e-49
11	815000	7	795000	91	7.09009e-52	7.59332e-49
2	475000	7	785000	90	7.34866e-52	7.86714e-49
8	1165000	8	1195000	505	8.5954e-52	9.19098e-49
2	465000	4	665000	78	8.75813e-52	9.36131e-49
12	1295000	3	575000	82	8.80422e-52	9.40688e-49
1	435000	9	1225000	76	8.81124e-52	9.41069e-49
7	785000	8	265000	107	9.11815e-52	9.73084e-49
1	435000	2	465000	84	9.38599e-52	1.00127e-48
10	945000	12	1265000	85	9.93798e-52	1.05974e-48
11	815000	6	475000	81	1.03145e-51	1.09947e-48
8	165000	8	195000	603	1.04093e-51	1.10914e-48
14	1085000	4	655000	72	1.14298e-51	1.21644e-48
12	1265000	2	415000	105	1.19442e-51	1.27069e-48
4	665000	7	785000	91	1.21168e-51	1.28855e-48
7	1225000	7	1255000	620	1.23787e-51	1.31588e-48
2	435000	6	495000	67	1.2629e-51	1.34197e-48
8	1115000	8	1175000	597	1.26327e-51	1.34197e-48
14	655000	14	685000	849	1.27519e-51	1.35344e-48
10	935000	7	805000	51	1.32343e-51	1.40354e-48
5	195000	5	235000	730	1.42261e-51	1.50814e-48
2	155000	2	185000	685	1.45611e-51	1.54306e-48
7	1025000	7	1055000	696	1.45755e-51	1.54398e-48
5	445000	8	275000	92	1.49579e-51	1.58387e-48
5	465000	9	1245000	51	1.76898e-51	1.87096e-48
10	1465000	10	1495000	614	1.79938e-51	1.90237e-48
4	285000	4	315000	436	1.85812e-51	1.96372e-48
8	315000	9	1255000	73	1.9224e-51	2.03086e-48
12	1275000	2	465000	76	1.94517e-51	2.05412e-48
6	355000	6	385000	604	2.17818e-51	2.29929e-48
6	455000	9	1255000	78	2.39873e-51	2.52817e-48
2	445000	6	495000	77	2.67741e-51	2.81971e-48
12	1265000	2	455000	73	2.70731e-51	2.85009e-48
2	235000	2	265000	538	2.74021e-51	2.88361e-48
2	425000	6	495000	89	2.9044e-51	3.05521e-48
8	235000	8	265000	793	2.97032e-51	3.12334e-48
13	1165000	9	1245000	34	3.07418e-51	3.23131e-48
14	125000	14	155000	460	3.68439e-51	3.86524e-48
4	665000	4	695000	585	3.74061e-51	3.9227e-48
12	865000	12	895000	786	4.37982e-51	4.5895e-48
13	1165000	2	455000	40	4.59022e-51	4.80811e-48
13	1155000	9	1235000	68	4.73402e-51	4.95683e-48
7	785000	9	1255000	88	4.86876e-51	5.09595e-48
6	455000	6	495000	650	5.07549e-51	5.31029e-48
14	1035000	2	485000	90	5.13264e-51	5.36801e-48
13	1155000	3	595000	66	5.17255e-51	5.40768e-48
1	435000	5	445000	94	6.75763e-51	7.05397e-48
14	1085000	3	595000	72	6.83046e-51	7.12725e-48
6	175000	6	205000	725	6.92782e-51	7.22608e-48
7	1115000	7	1155000	593	7.13343e-51	7.43768e-48
4	665000	6	495000	84	7.4291e-51	7.73707e-48
13	1185000	9	1225000	62	7.74696e-51	8.06501e-48
11	2025000	6	5000	56	8.69289e-51	9.04286e-48
12	1015000	12	1045000	512	8.91726e-51	9.27271e-48
5	445000	9	1225000	78	8.98545e-51	9.34005e-48
14	1055000	6	455000	88	9.57114e-51	9.94127e-48
1	475000	5	445000	70	1.10549e-50	1.14692e-47
6	1215000	6	1245000	471	1.11369e-50	1.15499e-47
6	485000	7	795000	72	1.12905e-50	1.17003e-47
10	175000	10	205000	734	1.14053e-50	1.18147e-47
10	375000	10	405000	968	1.19549e-50	1.23746e-47
14	1055000	8	295000	75	1.45187e-50	1.50114e-47
3	605000	5	455000	43	1.55104e-50	1.60185e-47
11	1875000	11	1965000	513	1.56341e-50	1.61339e-47
14	1085000	7	835000	82	1.62158e-50	1.6728e-47
12	1265000	13	1155000	82	1.68782e-50	1.74046e-47
14	1065000	3	605000	50	1.78486e-50	1.83983e-47
10	475000	10	505000	468	1.86905e-50	1.92588e-47
12	1835000	12	1865000	717	1.90218e-50	1.95928e-47
5	385000	5	415000	663	2.04785e-50	2.10614e-47
1	455000	12	1275000	53	2.08477e-50	2.14248e-47
13	1055000	13	1085000	726	2.30482e-50	2.36773e-47
11	175000	11	205000	583	2.46487e-50	2.5312e-47
6	1185000	6	1235000	639	2.73036e-50	2.80277e-47
7	175000	7	205000	563	3.18277e-50	3.26348e-47
12	1385000	12	1425000	665	3.21312e-50	3.29337e-47
4	655000	5	465000	64	3.3906e-50	3.47397e-47
2	365000	2	395000	809	4.06073e-50	4.15275e-47
7	195000	7	225000	586	4.08075e-50	4.17165e-47
5	865000	5	895000	630	4.14771e-50	4.23851e-47
11	2025000	5	1335000	56	4.2017e-50	4.29208e-47
14	3275000	9	65000	27	4.31233e-50	4.40178e-47
2	295000	2	345000	679	5.21399e-50	5.31616e-47
3	595000	6	495000	73	5.76661e-50	5.8752e-47
11	835000	9	1255000	61	5.8757e-50	5.9841e-47
3	595000	8	305000	43	6.05859e-50	6.16575e-47
2	425000	7	835000	81	6.49679e-50	6.60182e-47
4	625000	4	665000	483	6.55336e-50	6.65682e-47
9	1025000	9	1055000	691	6.56056e-50	6.66165e-47
6	1005000	6	1035000	555	6.67531e-50	6.77058e-47
12	1405000	12	1445000	741	7.11271e-50	7.20885e-47
3	75000	3	125000	301	7.45584e-50	7.5538e-47
9	1225000	9	1255000	489	7.59656e-50	7.69351e-47
14	1785000	14	1815000	668	7.93513e-50	8.03341e-47
13	1155000	14	1075000	56	8.84642e-50	8.94932e-47
13	145000	13	175000	441	9.36967e-50	9.47161e-47
8	1085000	8	1135000	532	9.78351e-50	9.87894e-47
6	1185000	6	1215000	564	9.84916e-50	9.94154e-47
7	1185000	7	1215000	587	1.04403e-49	1.05343e-46
13	1175000	4	665000	79	1.12519e-49	1.13449e-46
11	465000	11	505000	721	1.13025e-49	1.13916e-46
8	1135000	8	1195000	456	1.17143e-49	1.17936e-46
1	435000	9	1255000	80	1.24383e-49	1.25178e-46
5	455000	6	485000	43	1.30985e-49	1.31774e-46
12	1265000	3	575000	89	1.37636e-49	1.38413e-46
11	825000	9	1225000	74	1.46277e-49	1.47049e-46
12	1295000	13	1155000	73	1.50623e-49	1.51194e-46
11	855000	9	1225000	77	1.59096e-49	1.5964e-46
10	945000	8	285000	61	1.60094e-49	1.60583e-46
4	655000	7	795000	75	1.62014e-49	1.62449e-46
14	375000	14	405000	598	1.65986e-49	1.6637e-46
6	545000	6	575000	955	1.72505e-49	1.72841e-46
8	285000	9	1235000	57	1.8353e-49	1.83819e-46
1	115000	1	145000	568	1.87582e-49	1.87808e-46
12	1265000	2	425000	89	1.98546e-49	1.98712e-46
12	285000	12	315000	700	1.99663e-49	1.99757e-46
14	1065000	5	445000	65	2.48814e-49	2.48748e-46
3	625000	7	795000	98	2.51066e-49	2.50907e-46
13	1155000	8	315000	70	2.53324e-49	2.53071e-46
11	825000	4	625000	78	2.7765e-49	2.77169e-46
1	455000	12	1295000	53	3.08846e-49	3.08085e-46
1	455000	7	795000	59	3.14888e-49	3.13767e-46
13	1855000	13	1885000	641	3.66375e-49	3.64536e-46
1	435000	12	1265000	91	3.71642e-49	3.69642e-46
14	1065000	7	805000	51	3.72003e-49	3.69866e-46
12	1435000	12	1475000	923	3.72879e-49	3.70601e-46
9	215000	9	255000	681	3.77402e-49	3.74959e-46
14	1085000	3	585000	65	3.93664e-49	3.9083e-46
3	595000	4	635000	58	3.93863e-49	3.90886e-46
14	1795000	14	1825000	466	4.25831e-49	4.21996e-46
13	2255000	13	2285000	689	4.28402e-49	4.24389e-46
13	135000	13	165000	493	4.39244e-49	4.34971e-46
1	435000	8	285000	66	4.52119e-49	4.47558e-46
10	945000	14	1055000	82	4.91893e-49	4.86753e-46
13	1185000	14	1085000	70	5.04201e-49	4.9857e-46
2	475000	6	495000	81	5.28599e-49	5.22316e-46
11	825000	2	425000	86	5.40275e-49	5.3366e-46
2	335000	2	375000	830	6.11923e-49	6.03991e-46
1	445000	13	1175000	58	6.35136e-49	6.26221e-46
3	745000	3	775000	521	6.4841e-49	6.39078e-46
12	1265000	3	625000	95	6.68207e-49	6.58113e-46
11	825000	8	315000	78	7.11532e-49	7.00276e-46
1	435000	8	265000	95	7.67625e-49	7.55209e-46
13	365000	13	395000	557	7.69808e-49	7.57083e-46
4	105000	4	135000	484	8.09924e-49	7.96248e-46
14	1075000	2	465000	57	8.35745e-49	8.21336e-46
4	755000	4	805000	562	9.13248e-49	8.96532e-46
7	795000	8	285000	69	9.48184e-49	9.30492e-46
13	2395000	13	2425000	550	9.49358e-49	9.31308e-46
11	855000	5	495000	101	1.00539e-48	9.85567e-46
1	325000	1	355000	605	1.01669e-48	9.95772e-46
5	185000	5	215000	495	1.01654e-48	9.95772e-46
2	485000	2	515000	568	1.24356e-48	1.21597e-45
7	865000	7	895000	575	1.48314e-48	1.44815e-45
14	1055000	2	475000	82	1.7745e-48	1.7314e-45
6	475000	7	785000	89	1.8966e-48	1.84987e-45
11	1855000	11	1955000	461	1.90677e-48	1.85911e-45
6	665000	6	695000	707	2.02203e-48	1.96938e-45
13	1175000	7	785000	91	2.23598e-48	2.17621e-45
13	1155000	14	1065000	56	2.24303e-48	2.18229e-45
6	495000	7	835000	82	2.58013e-48	2.50936e-45
5	825000	5	855000	796	2.66622e-48	2.59215e-45
13	1155000	4	635000	62	2.80655e-48	2.72665e-45
2	465000	3	625000	84	3.04715e-48	2.95827e-45
11	855000	2	465000	84	3.29204e-48	3.19261e-45
1	435000	2	425000	85	3.34182e-48	3.23973e-45
1	465000	3	585000	55	3.52358e-48	3.41472e-45
5	425000	6	495000	86	4.58627e-48	4.43826e-45
5	1025000	5	1055000	459	4.65037e-48	4.49868e-45
6	305000	6	335000	554	4.95311e-48	4.78814e-45
11	2035000	6	5000	48	5.04875e-48	4.87886e-45
3	605000	4	635000	53	5.20657e-48	5.02958e-45
2	295000	2	325000	670	5.5477e-48	5.35531e-45
14	1705000	14	1735000	809	6.00787e-48	5.79336e-45
2	465000	3	575000	78	6.27326e-48	6.04499e-45
14	1085000	6	455000	81	6.69519e-48	6.44928e-45
13	1175000	8	315000	74	6.92874e-48	6.6719e-45
3	925000	3	955000	602	7.70684e-48	7.4159e-45
11	825000	8	265000	94	8.01181e-48	7.70663e-45
5	455000	9	1235000	45	8.20556e-48	7.89021e-45
12	1265000	8	325000	85	8.2345e-48	7.91524e-45
13	285000	13	315000	706	8.71758e-48	8.37367e-45
13	135000	13	205000	416	8.76263e-48	8.41397e-45
10	965000	6	495000	90	9.1124e-48	8.74057e-45
3	575000	5	445000	88	9.4026e-48	9.01575e-45
5	565000	5	595000	543	9.88822e-48	9.47471e-45
10	945000	13	1155000	70	1.0013e-47	9.59092e-45
3	775000	3	815000	538	1.02198e-47	9.78553e-45
14	1075000	8	305000	37	1.04209e-47	9.97455e-45
11	835000	14	1065000	48	1.0567e-47	1.01108e-44
4	865000	4	895000	1000	1.10128e-47	1.05337e-44
3	885000	3	915000	699	1.13952e-47	1.08957e-44
11	855000	8	275000	88	1.21337e-47	1.15977e-44
13	1745000	13	1775000	904	1.24301e-47	1.18768e-44
13	1865000	13	1895000	614	1.24743e-47	1.19107e-44
12	1285000	9	1255000	61	1.31664e-47	1.25672e-44
11	1305000	11	1335000	497	1.35671e-47	1.29405e-44
14	1085000	5	435000	70	1.5074e-47	1.43627e-44
14	1055000	4	635000	70	1.59412e-47	1.51783e-44
11	405000	11	435000	552	1.63933e-47	1.56034e-44
11	825000	4	665000	80	1.66502e-47	1.58423e-44
12	1295000	6	455000	76	1.68673e-47	1.60433e-44
13	2105000	13	2135000	632	1.75923e-47	1.6727e-44
12	1285000	13	1155000	60	2.10349e-47	1.99862e-44
8	325000	8	355000	702	2.11708e-47	2.01014e-44
10	945000	11	815000	74	2.1378e-47	2.0291e-44
9	255000	9	285000	859	2.1456e-47	2.03579e-44
11	815000	12	1265000	84	2.2305e-47	2.11561e-44
1	435000	6	495000	87	2.28399e-47	2.16559e-44
2	465000	9	1235000	67	2.36403e-47	2.2407e-44
1	195000	1	225000	786	2.41927e-47	2.29226e-44
14	375000	14	415000	674	2.49797e-47	2.36519e-44
13	1155000	3	605000	58	2.50157e-47	2.36777e-44
7	1035000	7	1065000	620	2.63286e-47	2.4903e-44
14	1055000	8	265000	96	2.74759e-47	2.59701e-44
13	1175000	4	625000	73	2.94539e-47	2.78204e-44
14	2995000	14	3035000	520	2.95256e-47	2.78784e-44
5	665000	5	705000	554	3.23161e-47	3.04921e-44
3	605000	4	645000	39	3.61354e-47	3.40604e-44
3	625000	7	785000	98	3.97584e-47	3.74364e-44
13	835000	13	865000	839	4.1155e-47	3.87381e-44
5	505000	5	535000	600	4.34906e-47	4.09224e-44
14	1135000	14	1165000	740	4.82177e-47	4.53232e-44
4	355000	4	385000	600	4.89585e-47	4.60037e-44
13	1175000	3	615000	65	4.99139e-47	4.68852e-44
11	815000	12	1295000	75	5.00253e-47	4.69737e-44
2	415000	2	465000	625	5.17612e-47	4.85701e-44
5	185000	5	225000	530	5.84256e-47	5.47481e-44
10	925000	12	1295000	62	6.44029e-47	6.03077e-44
12	1675000	12	1755000	382	6.90619e-47	6.46481e-44
10	935000	8	305000	36	7.06722e-47	6.61101e-44
9	815000	9	845000	749	8.4535e-47	7.89964e-44
2	455000	5	455000	42	9.70748e-47	9.06835e-44
6	485000	8	305000	39	9.76538e-47	9.11931e-44
3	625000	8	325000	85	1.0429e-46	9.73565e-44
7	125000	7	175000	476	1.09425e-46	1.02116e-43
1	465000	2	465000	65	1.10281e-46	1.02879e-43
10	925000	13	1175000	64	1.12436e-46	1.04853e-43
7	795000	9	1245000	55	1.13849e-46	1.06135e-43
11	815000	14	1055000	83	1.1525e-46	1.07403e-43
5	275000	5	305000	941	1.22918e-46	1.14432e-43
5	475000	7	805000	64	1.30495e-46	1.21444e-43
11	855000	3	575000	87	1.33084e-46	1.23812e-43
10	925000	11	815000	63	1.3351e-46	1.24165e-43
1	445000	14	1085000	57	1.41241e-46	1.3131e-43
6	645000	6	685000	517	1.47458e-46	1.37044e-43
14	1555000	14	1595000	617	1.49384e-46	1.38786e-43
6	335000	6	375000	686	1.53026e-46	1.42121e-43
1	395000	1	425000	803	1.53305e-46	1.42332e-43
11	815000	2	415000	90	1.71662e-46	1.59267e-43
6	1015000	6	1045000	571	1.76562e-46	1.63756e-43
2	665000	2	695000	746	1.79844e-46	1.66743e-43
3	605000	5	475000	61	1.81871e-46	1.68566e-43
7	1005000	7	1035000	816	1.9492e-46	1.80598e-43
2	445000	8	315000	64	2.21956e-46	2.05298e-43
4	625000	5	445000	78	2.46824e-46	2.28067e-43
12	1265000	4	635000	69	2.68209e-46	2.47575e-43
11	845000	14	1055000	64	3.04769e-46	2.81132e-43
14	1085000	4	665000	77	3.08225e-46	2.84126e-43
1	205000	1	235000	643	3.39237e-46	3.12608e-43
7	765000	7	845000	373	3.40902e-46	3.14036e-43
13	1165000	14	1075000	34	3.43225e-46	3.16069e-43
11	815000	2	465000	74	3.87926e-46	3.56871e-43
12	1435000	12	1465000	667	3.9298e-46	3.61276e-43
14	215000	14	245000	473	4.57435e-46	4.1968e-43
14	1055000	6	485000	66	4.61224e-46	4.23014e-43
3	585000	6	475000	60	4.75091e-46	4.35585e-43
11	835000	3	605000	49	4.89263e-46	4.48276e-43
10	935000	4	655000	48	4.89586e-46	4.48421e-43
4	635000	7	785000	72	4.91334e-46	4.49871e-43
7	975000	7	1005000	552	5.11003e-46	4.67564e-43
13	1185000	7	795000	72	5.65936e-46	5.17481e-43
7	785000	8	315000	81	6.52034e-46	5.95406e-43
13	1485000	13	1515000	559	6.60576e-46	6.02801e-43
13	215000	13	245000	505	6.93185e-46	6.32346e-43
1	375000	1	405000	553	7.14332e-46	6.512e-43
11	815000	7	825000	57	7.43268e-46	6.77352e-43
13	1185000	14	1055000	70	8.43339e-46	7.67777e-43
13	1155000	7	835000	70	8.53038e-46	7.76347e-43
11	825000	7	785000	92	9.6144e-46	8.7471e-43
14	1735000	14	1775000	763	9.90448e-46	9.008e-43
10	945000	5	475000	73	1.04049e-45	9.46001e-43
10	1285000	10	1325000	570	1.05553e-45	9.59346e-43
6	495000	8	295000	69	1.12087e-45	1.01772e-42
12	295000	12	325000	468	1.26637e-45	1.14867e-42
1	475000	7	795000	66	1.73724e-45	1.57316e-42
3	905000	3	935000	563	1.83269e-45	1.65904e-42
4	745000	4	785000	512	1.88475e-45	1.70504e-42
12	1295000	2	435000	57	1.97137e-45	1.78221e-42
10	935000	14	1085000	56	2.16625e-45	1.95774e-42
1	445000	5	445000	59	2.22419e-45	2.00943e-42
11	855000	2	415000	99	2.28758e-45	2.06534e-42
10	205000	10	235000	818	2.32784e-45	2.10099e-42
5	445000	8	285000	65	2.5248e-45	2.27649e-42
11	855000	12	1295000	81	2.58467e-45	2.3297e-42
14	115000	14	145000	636	2.66475e-45	2.39949e-42
13	2495000	13	2525000	425	2.98549e-45	2.68297e-42
10	935000	13	1165000	33	3.16464e-45	2.84303e-42
7	185000	7	275000	521	3.26952e-45	2.93629e-42
1	435000	7	835000	78	3.74987e-45	3.36545e-42
12	1275000	8	325000	72	3.82383e-45	3.42957e-42
8	285000	9	1255000	57	3.91226e-45	3.50772e-42
14	1055000	6	515000	79	3.94862e-45	3.53916e-42
3	615000	6	475000	62	4.01864e-45	3.60073e-42
12	1305000	14	1085000	65	4.02634e-45	3.60644e-42
10	945000	2	465000	70	4.48642e-45	4.01458e-42
1	455000	10	935000	39	4.53954e-45	4.06078e-42
11	825000	5	435000	69	4.69286e-45	4.19654e-42
10	165000	10	195000	636	4.71243e-45	4.21266e-42
8	45000	8	1395000	83	5.0183e-45	4.48167e-42
3	85000	3	115000	386	5.25779e-45	4.69401e-42
10	405000	10	435000	772	5.75082e-45	5.13249e-42
14	625000	14	655000	837	6.04368e-45	5.39209e-42
2	175000	2	205000	522	6.29124e-45	5.60561e-42
11	165000	11	195000	710	6.72616e-45	5.98921e-42
6	495000	8	325000	80	6.77755e-45	6.03299e-42
3	435000	3	465000	712	8.20219e-45	7.29635e-42
9	995000	9	1025000	590	9.13344e-45	8.11679e-42
12	1275000	9	1225000	63	9.18417e-45	8.15921e-42
2	425000	7	795000	86	9.49314e-45	8.43094e-42
13	1175000	2	425000	78	9.90876e-45	8.79432e-42
4	655000	8	275000	65	1.02495e-44	9.09378e-42
2	445000	4	665000	65	1.11536e-44	9.88305e-42
13	595000	13	625000	626	1.1367e-44	1.00688e-41
2	425000	4	665000	75	1.14583e-44	1.01464e-41
4	545000	4	605000	220	1.15886e-44	1.02585e-41
2	465000	8	315000	68	1.34473e-44	1.18883e-41
13	1165000	3	595000	37	1.41297e-44	1.24835e-41
8	695000	8	725000	846	1.66034e-44	1.46547e-41
10	925000	11	855000	67	1.68868e-44	1.48952e-41
4	555000	4	605000	142	1.76544e-44	1.55521e-41
2	425000	6	455000	77	1.77645e-44	1.5644e-41
4	55000	4	1125000	89	1.87802e-44	1.65278e-41
12	2215000	12	2245000	183	1.94437e-44	1.71006e-41
3	575000	3	615000	412	2.36188e-44	2.07391e-41
10	945000	3	575000	73	2.5107e-44	2.20245e-41
13	1175000	8	265000	86	2.52542e-44	2.21465e-41
14	1085000	3	625000	85	2.53118e-44	2.21898e-41
10	915000	6	495000	69	2.56601e-44	2.24879e-41
3	955000	3	985000	534	2.63839e-44	2.31074e-41
5	1245000	5	1285000	443	2.69579e-44	2.35949e-41
11	425000	11	455000	749	2.70755e-44	2.36903e-41
11	845000	9	1235000	52	2.95786e-44	2.58554e-41
3	475000	3	505000	606	3.0024e-44	2.62363e-41
4	1085000	4	1115000	383	3.2098e-44	2.80037e-41
7	185000	7	225000	648	3.35618e-44	2.92713e-41
2	415000	8	275000	90	3.42384e-44	2.98424e-41
12	1265000	12	1305000	462	3.57695e-44	3.11669e-41
7	395000	7	425000	421	3.79748e-44	3.30778e-41
12	1265000	6	475000	80	3.80871e-44	3.3165e-41
7	775000	7	835000	437	3.91568e-44	3.40856e-41
1	435000	11	815000	78	4.02428e-44	3.50086e-41
11	815000	2	425000	76	4.67511e-44	4.06443e-41
12	1265000	9	1235000	71	4.68201e-44	4.06782e-41
11	815000	11	845000	405	4.96737e-44	4.31162e-41
6	565000	6	595000	737	5.57549e-44	4.83484e-41
8	1095000	8	1125000	536	5.59041e-44	4.84623e-41
1	455000	5	445000	54	5.6555e-44	4.89954e-41
1	465000	14	1065000	49	5.71738e-44	4.95156e-41
6	495000	9	1215000	71	6.36756e-44	5.50764e-41
13	1155000	7	785000	79	6.39138e-44	5.52649e-41
11	815000	6	455000	74	6.9593e-44	6.01564e-41
3	575000	4	665000	74	7.60142e-44	6.56236e-41
7	1135000	7	1165000	794	7.62624e-44	6.58169e-41
12	1295000	3	605000	57	7.66005e-44	6.60878e-41
4	635000	4	665000	446	8.09052e-44	6.97796e-41
1	445000	6	495000	56	8.12856e-44	7.00854e-41
10	905000	14	1055000	79	8.18812e-44	7.05765e-41
4	645000	5	455000	31	8.41194e-44	7.24828e-41
6	105000	6	135000	457	8.74005e-44	7.52385e-41
6	475000	8	275000	75	8.78343e-44	7.5588e-41
11	835000	13	1155000	55	8.88285e-44	7.64194e-41
13	235000	13	265000	523	8.93652e-44	7.68569e-41
4	255000	4	285000	712	9.3457e-44	8.03505e-41
5	905000	5	935000	383	1.02475e-43	8.80763e-41
1	475000	13	1175000	59	1.16234e-43	9.98071e-41
2	425000	7	785000	87	1.16873e-43	1.00324e-40
9	1215000	9	1265000	263	1.2017e-43	1.03122e-40
4	655000	7	825000	48	1.20433e-43	1.03315e-40
14	1085000	3	615000	63	1.24568e-43	1.06829e-40
12	1305000	8	315000	58	1.25497e-43	1.07591e-40
14	1035000	8	325000	82	1.25925e-43	1.07924e-40
1	455000	9	1235000	45	1.2859e-43	1.10173e-40
1	465000	13	1155000	60	1.29572e-43	1.1098e-40
8	145000	8	175000	786	1.32478e-43	1.13397e-40
8	195000	8	225000	895	1.33717e-43	1.14422e-40
8	475000	8	505000	439	1.36216e-43	1.16524e-40
5	345000	5	375000	676	1.41701e-43	1.2114e-40
1	445000	10	945000	51	1.43633e-43	1.22753e-40
6	1235000	6	1285000	508	1.46626e-43	1.25271e-40
5	495000	6	495000	91	1.47063e-43	1.25605e-40
3	215000	3	245000	554	1.56509e-43	1.33631e-40
13	1185000	4	655000	54	1.62932e-43	1.39028e-40
11	845000	3	595000	50	1.6314e-43	1.39162e-40
1	435000	4	625000	72	1.66496e-43	1.41979e-40
5	585000	5	615000	643	1.74983e-43	1.4917e-40
6	1215000	6	1265000	508	1.91455e-43	1.63161e-40
7	1145000	7	1205000	398	2.72755e-43	2.32011e-40
8	35000	8	1415000	60	2.7764e-43	2.36092e-40
11	815000	4	655000	62	2.99095e-43	2.54257e-40
5	395000	5	425000	948	3.20937e-43	2.72568e-40
13	1155000	2	455000	57	3.22639e-43	2.73928e-40
12	1665000	12	1755000	388	3.28381e-43	2.7863e-40
1	445000	7	815000	51	3.34646e-43	2.83857e-40
10	1195000	10	1235000	489	3.41472e-43	2.89557e-40
13	1155000	7	805000	57	3.42877e-43	2.90658e-40
9	655000	9	685000	825	3.49218e-43	2.95941e-40
10	935000	4	645000	34	3.51644e-43	2.97904e-40
12	1295000	13	1185000	61	3.64056e-43	3.08323e-40
5	475000	9	1255000	70	3.97278e-43	3.36354e-40
5	475000	8	265000	84	4.04741e-43	3.42566e-40
3	585000	5	445000	63	4.18866e-43	3.54411e-40
6	1195000	6	1265000	471	4.74918e-43	4.01464e-40
4	1015000	4	1105000	300	5.07824e-43	4.29013e-40
9	155000	9	185000	519	5.10106e-43	4.30807e-40
11	845000	2	455000	48	5.31915e-43	4.49087e-40
4	645000	5	465000	41	5.32191e-43	4.4918e-40
1	475000	2	445000	52	5.33244e-43	4.4993e-40
4	885000	4	925000	513	5.34061e-43	4.50479e-40
10	955000	5	445000	70	5.59139e-43	4.71433e-40
9	1225000	9	1265000	281	5.79878e-43	4.88671e-40
3	575000	7	785000	86	5.88716e-43	4.95965e-40
12	1265000	7	835000	78	6.11153e-43	5.14389e-40
12	1275000	5	475000	70	6.20067e-43	5.21731e-40
3	625000	8	315000	75	6.54517e-43	5.50546e-40
3	705000	3	735000	744	6.69896e-43	5.63308e-40
2	425000	8	315000	70	7.14966e-43	6.00836e-40
3	625000	5	475000	81	7.5949e-43	6.37662e-40
5	435000	5	475000	432	7.71075e-43	6.47189e-40
2	395000	2	425000	721	7.80614e-43	6.54993e-40
13	345000	13	385000	627	9.67455e-43	8.10517e-40
10	925000	9	1255000	57	9.79546e-43	8.20393e-40
1	455000	6	485000	41	1.03491e-42	8.66492e-40
8	1145000	8	1175000	681	1.06188e-42	8.88804e-40
10	855000	10	885000	657	1.08769e-42	9.10123e-40
14	275000	14	305000	804	1.10692e-42	9.25648e-40
10	945000	8	315000	65	1.14572e-42	9.57501e-40
12	1265000	7	815000	76	1.19941e-42	1.00206e-39
14	1065000	9	1255000	52	1.21468e-42	1.01452e-39
7	1045000	7	1075000	480	1.27412e-42	1.06383e-39
14	1035000	5	495000	94	1.33308e-42	1.11272e-39
10	935000	12	1295000	51	1.35823e-42	1.13336e-39
6	455000	9	1225000	64	1.37052e-42	1.14327e-39
3	625000	9	1255000	76	1.45164e-42	1.21057e-39
14	1085000	8	285000	59	1.45969e-42	1.21691e-39
11	855000	2	475000	77	1.52903e-42	1.27393e-39
10	555000	10	585000	377	1.59201e-42	1.326e-39
3	795000	3	825000	558	1.75269e-42	1.45894e-39
1	215000	1	245000	714	1.83375e-42	1.52547e-39
12	35000	12	2225000	55	1.9497e-42	1.62144e-39
2	435000	9	1235000	50	2.00888e-42	1.67014e-39
12	1175000	12	1205000	689	2.04316e-42	1.69812e-39
1	465000	5	475000	63	2.11511e-42	1.75738e-39
2	295000	2	335000	787	2.32099e-42	1.92786e-39
14	1065000	6	495000	57	2.50595e-42	2.08086e-39
10	355000	10	385000	564	2.50886e-42	2.08264e-39
11	825000	3	615000	63	2.64226e-42	2.19136e-39
2	305000	2	335000	659	2.7367e-42	2.269e-39
5	475000	7	815000	70	2.78515e-42	2.30847e-39
12	1305000	5	445000	66	2.85736e-42	2.3676e-39
10	945000	2	425000	71	2.87096e-42	2.37814e-39
2	465000	8	275000	72	2.87645e-42	2.38196e-39
3	575000	6	495000	79	2.97185e-42	2.46021e-39
13	1155000	4	665000	66	2.98013e-42	2.46631e-39
3	625000	5	495000	93	3.23076e-42	2.67211e-39
11	845000	8	295000	49	3.43774e-42	2.84157e-39
9	155000	9	205000	455	3.45737e-42	2.85693e-39
2	465000	7	835000	69	3.46742e-42	2.86436e-39
7	805000	8	315000	56	3.55959e-42	2.93961e-39
9	155000	9	195000	489	3.73287e-42	3.08177e-39
2	435000	7	795000	61	4.2817e-42	3.52845e-39
6	285000	6	325000	551	4.7663e-42	3.92661e-39
5	855000	5	915000	537	4.8785e-42	4.01782e-39
4	495000	4	525000	649	5.0548e-42	4.16051e-39
14	1055000	2	415000	93	5.13471e-42	4.225e-39
8	1115000	8	1185000	479	5.39588e-42	4.43855e-39
14	1035000	8	275000	82	5.49798e-42	4.51981e-39
4	1005000	4	1125000	298	5.55209e-42	4.56291e-39
14	1555000	14	1585000	670	5.75835e-42	4.73099e-39
1	435000	3	575000	78	5.78098e-42	4.74815e-39
7	235000	7	275000	604	6.02052e-42	4.9434e-39
11	1855000	11	1965000	415	6.24754e-42	5.12671e-39
14	3245000	9	65000	27	6.55213e-42	5.37342e-39
11	845000	6	485000	46	6.56694e-42	5.38394e-39
5	475000	6	495000	77	6.68163e-42	5.47302e-39
7	155000	7	195000	437	7.01192e-42	5.74184e-39
13	1155000	9	1255000	64	7.26489e-42	5.94719e-39
1	455000	2	435000	39	7.4631e-42	6.10761e-39
14	1085000	9	1225000	65	8.54595e-42	6.98539e-39
11	1075000	11	1105000	481	8.73335e-42	7.13642e-39
13	2785000	13	2815000	613	8.82634e-42	7.21024e-39
11	25000	11	2035000	52	9.14549e-42	7.46871e-39
4	625000	7	785000	76	9.9512e-42	8.12426e-39
1	465000	3	615000	52	1.03018e-41	8.40796e-39
12	1265000	9	1255000	74	1.06764e-41	8.71105e-39
7	1205000	7	1255000	638	1.15358e-41	9.40945e-39
10	925000	14	1065000	45	1.32768e-41	1.08198e-38
14	1035000	5	475000	80	1.34544e-41	1.09613e-38
10	925000	8	295000	51	1.3608e-41	1.10831e-38
14	1085000	3	605000	58	1.41157e-41	1.14931e-38
9	855000	9	885000	543	1.44272e-41	1.17433e-38
5	435000	7	795000	69	1.46576e-41	1.19237e-38
13	1155000	4	655000	57	1.47149e-41	1.19667e-38
2	415000	3	575000	87	1.51546e-41	1.23206e-38
13	1155000	5	465000	62	1.60653e-41	1.30493e-38
5	215000	5	245000	576	1.68919e-41	1.37044e-38
1	445000	8	295000	45	1.75013e-41	1.41861e-38
14	2665000	14	2705000	324	1.76689e-41	1.43176e-38
10	925000	14	1055000	63	1.87699e-41	1.51962e-38
1	475000	14	1085000	58	1.99491e-41	1.61269e-38
14	1055000	5	475000	78	2.07751e-41	1.67897e-38
7	785000	8	275000	84	2.13473e-41	1.72469e-38
5	1075000	5	1105000	351	2.17345e-41	1.75494e-38
6	495000	8	265000	87	2.27382e-41	1.8338e-38
13	2525000	13	2555000	505	2.54612e-41	2.04977e-38
4	225000	4	265000	687	2.58047e-41	2.0768e-38
11	855000	8	255000	89	2.59794e-41	2.09025e-38
8	1095000	8	1135000	432	2.62169e-41	2.10873e-38
5	445000	9	1245000	50	2.63431e-41	2.11825e-38
7	1195000	7	1245000	437	2.68406e-41	2.15635e-38
6	1185000	6	1265000	458	2.71262e-41	2.17864e-38
10	925000	7	805000	49	2.81105e-41	2.25637e-38
7	115000	7	185000	493	2.83674e-41	2.27632e-38
11	1865000	11	1965000	452	3.05287e-41	2.4483e-38
4	735000	4	775000	438	3.12197e-41	2.50225e-38
11	855000	12	1265000	86	3.26131e-41	2.61239e-38
6	5000	6	1335000	57	3.5067e-41	2.80648e-38
9	1305000	9	1335000	459	3.50927e-41	2.80688e-38
9	95000	9	125000	399	3.63035e-41	2.90202e-38
8	1115000	8	1215000	445	3.66294e-41	2.92721e-38
1	435000	12	1295000	73	3.70414e-41	2.95926e-38
7	145000	7	175000	464	3.94107e-41	3.14763e-38
11	855000	4	655000	66	3.9701e-41	3.16988e-38
9	635000	9	665000	610	4.53288e-41	3.61604e-38
8	1315000	8	1345000	467	4.72608e-41	3.76905e-38
13	1085000	13	1115000	607	4.7751e-41	3.80703e-38
11	835000	6	495000	59	4.95708e-41	3.94749e-38
12	1265000	5	425000	80	5.15103e-41	4.09954e-38
11	305000	11	335000	544	5.22239e-41	4.1539e-38
12	685000	12	715000	896	5.76992e-41	4.58673e-38
11	1205000	11	1245000	571	5.93012e-41	4.7127e-38
2	455000	8	305000	36	6.63976e-41	5.27511e-38
11	855000	13	1155000	73	6.80735e-41	5.40668e-38
9	185000	9	215000	469	7.61203e-41	6.0405e-38
5	415000	5	495000	446	7.63311e-41	6.05546e-38
12	1265000	2	475000	74	8.04921e-41	6.37998e-38
11	165000	11	205000	590	8.20859e-41	6.50252e-38
6	775000	6	815000	369	8.61825e-41	6.82306e-38
1	425000	3	575000	69	8.92442e-41	7.0634e-38
8	305000	9	1245000	30	9.41417e-41	7.44668e-38
11	1555000	11	1585000	684	1.00187e-40	7.92027e-38
7	785000	7	845000	560	1.03224e-40	8.15565e-38
3	595000	5	455000	39	1.10705e-40	8.74414e-38
1	475000	4	655000	48	1.13684e-40	8.9768e-38
11	815000	5	465000	65	1.19681e-40	9.44767e-38
5	465000	8	315000	61	1.32302e-40	1.04288e-37
11	1625000	11	1655000	647	1.33146e-40	1.04923e-37
2	415000	5	475000	84	1.34554e-40	1.06002e-37
6	295000	6	325000	472	1.38728e-40	1.09195e-37
2	445000	3	585000	50	1.40989e-40	1.10943e-37
7	1015000	7	1045000	597	1.48968e-40	1.17187e-37
14	3055000	14	3085000	536	1.66371e-40	1.30802e-37
6	325000	6	375000	542	1.66687e-40	1.31013e-37
11	865000	12	1265000	72	1.69297e-40	1.33025e-37
12	1295000	8	315000	64	1.80626e-40	1.41886e-37
14	1085000	5	455000	45	1.8447e-40	1.44864e-37
1	435000	3	605000	58	1.90384e-40	1.49379e-37
5	895000	5	925000	658	1.9105e-40	1.49858e-37
10	1205000	10	1235000	537	1.91358e-40	1.50057e-37
12	1305000	7	795000	65	1.92195e-40	1.50626e-37
4	635000	5	455000	38	2.01824e-40	1.57991e-37
6	115000	6	155000	475	2.21383e-40	1.73252e-37
13	1155000	6	485000	53	2.26614e-40	1.77294e-37
5	445000	7	825000	57	2.30849e-40	1.80556e-37
13	865000	13	895000	603	2.40205e-40	1.8782e-37
13	1175000	7	825000	53	2.47896e-40	1.93729e-37
7	125000	7	275000	337	2.47833e-40	1.93729e-37
14	1755000	14	1785000	689	2.75837e-40	2.15433e-37
10	935000	3	605000	41	2.77838e-40	2.16934e-37
13	1175000	3	575000	73	2.93651e-40	2.29149e-37
10	925000	13	1155000	54	2.96894e-40	2.31613e-37
12	355000	12	395000	463	2.98785e-40	2.33021e-37
11	845000	2	465000	53	2.99191e-40	2.33271e-37
7	395000	7	435000	410	3.06475e-40	2.38882e-37
12	1265000	5	435000	66	3.159e-40	2.46158e-37
14	3105000	14	3155000	569	3.22546e-40	2.51264e-37
8	1285000	8	1315000	464	3.40829e-40	2.65203e-37
8	1165000	8	1215000	464	3.41106e-40	2.65343e-37
5	1215000	5	1245000	541	3.42166e-40	2.66015e-37
1	455000	4	655000	41	3.53252e-40	2.74477e-37
11	845000	12	1275000	52	3.60302e-40	2.79555e-37
9	925000	9	955000	509	3.61472e-40	2.80383e-37
12	1295000	7	835000	67	3.68536e-40	2.85781e-37
10	935000	7	795000	55	3.72673e-40	2.88825e-37
9	535000	9	565000	601	3.9357e-40	3.04846e-37
3	515000	3	545000	672	3.9696e-40	3.07297e-37
7	125000	7	185000	544	3.98925e-40	3.08731e-37
12	1645000	12	1675000	519	3.99726e-40	3.09262e-37
12	1275000	13	1185000	57	4.01658e-40	3.10669e-37
5	495000	8	255000	92	4.15506e-40	3.21288e-37
7	785000	8	255000	91	4.17019e-40	3.22367e-37
5	225000	5	275000	732	4.2762e-40	3.30468e-37
14	1725000	14	1755000	573	4.31536e-40	3.33399e-37
12	1265000	2	465000	74	4.32335e-40	3.33921e-37
14	1945000	14	1985000	663	5.01197e-40	3.86779e-37
9	915000	9	955000	454	5.20333e-40	4.01432e-37
13	1155000	3	625000	72	5.24026e-40	4.04167e-37
7	795000	9	1225000	68	5.35868e-40	4.13183e-37
6	325000	6	355000	529	5.78983e-40	4.463e-37
5	885000	5	915000	567	5.79404e-40	4.46498e-37
5	435000	9	1235000	54	5.79965e-40	4.46805e-37
1	435000	4	635000	61	5.92357e-40	4.56222e-37
1	435000	6	475000	73	5.93148e-40	4.56702e-37
14	1085000	8	275000	74	6.38727e-40	4.91379e-37
12	1265000	8	275000	78	6.52923e-40	5.02016e-37
4	345000	4	375000	446	6.61792e-40	5.08692e-37
8	1135000	8	1165000	529	6.67244e-40	5.12592e-37
4	675000	5	475000	65	6.75184e-40	5.18399e-37
12	1295000	2	465000	66	7.07705e-40	5.43062e-37
2	415000	7	835000	81	7.14295e-40	5.4781e-37
12	1275000	7	785000	76	7.15671e-40	5.4871e-37
4	655000	7	835000	58	7.85828e-40	6.01991e-37
12	1265000	7	805000	62	8.34025e-40	6.38553e-37
2	425000	6	475000	71	8.34608e-40	6.3882e-37
13	1335000	13	1365000	644	8.75263e-40	6.69749e-37
1	445000	2	445000	45	8.88504e-40	6.7969e-37
14	735000	14	775000	524	1.01587e-39	7.75811e-37
10	905000	5	475000	69	1.01703e-39	7.76486e-37
11	835000	8	305000	34	1.02013e-39	7.7863e-37
4	395000	4	425000	585	1.03382e-39	7.88861e-37
2	415000	2	495000	471	1.06482e-39	8.12054e-37
6	1135000	6	1235000	480	1.07887e-39	8.22545e-37
11	815000	12	1275000	66	1.0937e-39	8.33615e-37
12	25000	12	2245000	40	1.14e-39	8.68662e-37
6	455000	7	795000	78	1.22407e-39	9.32455e-37
5	435000	6	495000	64	1.23778e-39	9.42636e-37
8	1055000	8	1135000	364	1.26323e-39	9.61753e-37
8	1405000	8	1435000	219	1.28878e-39	9.8093e-37
7	775000	7	845000	414	1.29375e-39	9.84437e-37
11	1525000	11	1555000	734	1.38446e-39	1.05317e-36
6	1175000	6	1205000	372	1.40095e-39	1.06511e-36
3	325000	3	355000	635	1.41603e-39	1.07598e-36
5	675000	5	705000	521	1.44301e-39	1.09617e-36
4	705000	4	735000	504	1.4629e-39	1.11066e-36
4	475000	4	515000	485	1.54005e-39	1.16891e-36
10	925000	12	1285000	47	1.7267e-39	1.30948e-36
5	195000	5	245000	576	1.82857e-39	1.38558e-36
4	135000	4	1015000	109	1.92135e-39	1.45548e-36
13	2175000	13	2205000	521	2.042e-39	1.54601e-36
2	475000	5	475000	67	2.06049e-39	1.55957e-36
7	805000	8	305000	35	2.20744e-39	1.66987e-36
6	1125000	6	1155000	502	2.20953e-39	1.67098e-36
7	785000	9	1225000	69	2.3856e-39	1.80364e-36
10	1015000	10	1045000	407	2.45221e-39	1.85297e-36
2	465000	9	1225000	59	2.47826e-39	1.87214e-36
8	595000	8	625000	621	2.49761e-39	1.88623e-36
1	485000	5	445000	64	2.73763e-39	2.06635e-36
2	435000	4	635000	45	2.83374e-39	2.1383e-36
12	1415000	12	1455000	668	2.87235e-39	2.16623e-36
11	815000	8	325000	69	3.01775e-39	2.27526e-36
2	465000	3	585000	53	3.10337e-39	2.33916e-36
14	3015000	14	3055000	460	3.20487e-39	2.41499e-36
3	455000	3	505000	612	3.28835e-39	2.47653e-36
2	415000	5	495000	96	3.33402e-39	2.51023e-36
6	455000	8	275000	71	3.44149e-39	2.59043e-36
12	1935000	12	1965000	403	3.47061e-39	2.61163e-36
7	145000	7	185000	522	3.56132e-39	2.67915e-36
7	115000	7	145000	544	3.56393e-39	2.68036e-36
12	1275000	3	585000	52	3.59649e-39	2.7041e-36
10	955000	13	1175000	61	3.83449e-39	2.88066e-36
3	225000	3	255000	449	4.1281e-39	3.09782e-36
2	455000	5	475000	57	4.19984e-39	3.15078e-36
2	455000	6	495000	60	4.24152e-39	3.18117e-36
10	225000	10	255000	465	4.59077e-39	3.44217e-36
4	645000	7	805000	35	5.13066e-39	3.8438e-36
13	1155000	3	575000	66	5.14362e-39	3.85244e-36
12	1265000	4	665000	73	5.36725e-39	4.01883e-36
4	545000	4	615000	298	5.78213e-39	4.32591e-36
12	1295000	7	825000	50	6.03939e-39	4.51465e-36
7	435000	7	485000	283	6.13865e-39	4.58759e-36
11	1845000	11	1885000	411	6.16307e-39	4.60458e-36
13	1185000	2	425000	60	6.65116e-39	4.96379e-36
7	815000	9	1225000	58	6.76307e-39	5.04592e-36
13	1155000	2	425000	66	6.76751e-39	5.04785e-36
1	405000	11	815000	72	6.92395e-39	5.16171e-36
9	255000	9	295000	717	7.12016e-39	5.30652e-36
2	415000	8	265000	94	7.3974e-39	5.51164e-36
4	885000	4	915000	433	7.78058e-39	5.79396e-36
11	1225000	11	1255000	597	7.85128e-39	5.84501e-36
13	205000	13	265000	363	7.96314e-39	5.92666e-36
13	425000	13	455000	413	7.99816e-39	5.9511e-36
8	975000	8	1005000	479	8.24315e-39	6.12835e-36
14	725000	14	755000	668	8.28603e-39	6.15855e-36
13	1195000	2	465000	59	8.49839e-39	6.31294e-36
14	3045000	14	3085000	571	8.95861e-39	6.65299e-36
4	625000	6	475000	63	9.56917e-39	7.1006e-36
2	465000	5	475000	67	9.61781e-39	7.13475e-36
14	2655000	14	2685000	394	9.84755e-39	7.30319e-36
9	1045000	9	1075000	427	1.02448e-38	7.59571e-36
1	435000	1	475000	377	1.03591e-38	7.67836e-36
6	495000	7	815000	70	1.16252e-38	8.6145e-36
3	465000	3	505000	529	1.18438e-38	8.7717e-36
12	365000	12	395000	479	1.18578e-38	8.77971e-36
10	195000	10	225000	538	1.20235e-38	8.89997e-36
6	185000	6	215000	510	1.20722e-38	8.93356e-36
12	1265000	13	1185000	63	1.21948e-38	9.02182e-36
2	305000	2	345000	518	1.27131e-38	9.40274e-36
13	1155000	5	425000	66	1.37916e-38	1.01949e-35
11	675000	11	705000	612	1.46202e-38	1.08015e-35
11	1885000	11	1965000	510	1.46883e-38	1.08488e-35
7	1005000	7	1045000	650	1.58368e-38	1.1694e-35
5	1235000	5	1275000	438	1.65645e-38	1.2228e-35
13	1165000	2	445000	34	1.66954e-38	1.23212e-35
7	115000	7	155000	507	1.74135e-38	1.28477e-35
13	185000	13	235000	446	1.75753e-38	1.29636e-35
4	635000	6	495000	60	1.84228e-38	1.35813e-35
11	1765000	11	1795000	413	1.87079e-38	1.37878e-35
10	905000	3	575000	69	1.96171e-38	1.44501e-35
13	1205000	6	495000	69	1.98794e-38	1.46393e-35
12	1295000	14	1055000	72	2.15898e-38	1.58945e-35
5	375000	5	405000	585	2.18232e-38	1.6062e-35
4	655000	6	495000	61	2.20312e-38	1.62107e-35
8	1085000	8	1215000	322	2.21324e-38	1.62807e-35
11	425000	11	465000	734	2.35738e-38	1.73317e-35
13	505000	13	535000	705	2.41068e-38	1.77188e-35
2	415000	3	625000	90	2.52977e-38	1.85841e-35
14	1055000	8	335000	80	2.65142e-38	1.9462e-35
8	875000	8	905000	735	2.65964e-38	1.9517e-35
9	205000	9	235000	629	2.69435e-38	1.97557e-35
11	35000	11	2015000	56	2.96092e-38	2.16869e-35
4	345000	4	385000	516	3.10376e-38	2.2727e-35
8	45000	8	1435000	64	3.15561e-38	2.31005e-35
10	1045000	10	1075000	516	3.27557e-38	2.39583e-35
7	185000	7	215000	592	3.5796e-38	2.6155e-35
14	1735000	14	1815000	455	3.59043e-38	2.62271e-35
14	1055000	3	625000	82	3.59869e-38	2.62804e-35
7	1165000	7	1275000	493	3.61531e-38	2.63947e-35
14	1055000	2	425000	76	3.9742e-38	2.89993e-35
13	1075000	13	1115000	667	3.98777e-38	2.90905e-35
10	915000	3	625000	65	3.9949e-38	2.91347e-35
14	2675000	14	2705000	471	4.04898e-38	2.95212e-35
1	155000	1	185000	344	4.05275e-38	2.95407e-35
11	265000	11	305000	580	4.1198e-38	3.00214e-35
6	805000	6	835000	526	4.14984e-38	3.02323e-35
2	465000	8	335000	71	4.18685e-38	3.04937e-35
6	495000	9	1225000	63	4.2729e-38	3.11121e-35
8	725000	8	755000	674	4.48279e-38	3.26316e-35
8	1115000	8	1195000	377	4.59806e-38	3.34618e-35
12	1355000	12	1385000	744	4.62495e-38	3.36484e-35
11	1635000	11	1685000	539	4.86142e-38	3.53594e-35
3	635000	8	315000	57	4.97973e-38	3.62102e-35
11	465000	11	495000	643	5.0485e-38	3.66809e-35
1	435000	5	475000	72	5.10144e-38	3.70556e-35
3	625000	3	655000	406	5.1441e-38	3.73556e-35
2	425000	2	485000	434	5.28819e-38	3.83916e-35
5	445000	6	455000	75	5.38417e-38	3.9078e-35
8	485000	8	515000	739	5.48413e-38	3.97929e-35
11	855000	2	445000	66	5.57373e-38	4.04215e-35
8	845000	8	875000	525	5.71119e-38	4.13963e-35
14	2165000	14	2195000	705	5.73043e-38	4.15247e-35
1	475000	10	945000	51	5.83475e-38	4.22694e-35
8	385000	8	415000	528	5.84373e-38	4.23232e-35
6	165000	6	195000	665	6.119e-38	4.4305e-35
2	465000	4	625000	61	6.47514e-38	4.68587e-35
6	15000	6	1355000	38	6.81393e-38	4.92973e-35
1	575000	8	75000	31	7.36035e-38	5.32364e-35
3	625000	6	475000	74	7.75647e-38	5.60568e-35
3	615000	6	495000	59	7.76455e-38	5.60853e-35
1	445000	12	1295000	47	7.97974e-38	5.75938e-35
14	3265000	9	65000	28	8.1035e-38	5.84716e-35
7	565000	7	595000	259	8.13169e-38	5.86594e-35
7	545000	7	595000	196	8.19724e-38	5.91166e-35
8	295000	9	1225000	51	8.20396e-38	5.91493e-35
9	1065000	9	1095000	470	8.32423e-38	5.99847e-35
14	705000	14	735000	650	9.07664e-38	6.53893e-35
2	465000	7	805000	54	9.08741e-38	6.54495e-35
14	1055000	8	285000	57	9.09336e-38	6.54751e-35
12	1265000	4	625000	68	9.36132e-38	6.73688e-35
13	1175000	14	1045000	64	9.44259e-38	6.79356e-35
1	435000	1	485000	376	9.4831e-38	6.82091e-35
13	2885000	9	25000	30	9.64261e-38	6.93197e-35
5	665000	5	695000	579	9.69127e-38	6.96511e-35
11	835000	12	1265000	57	1.03669e-37	7.44674e-35
7	675000	7	705000	460	1.04927e-37	7.53512e-35
7	995000	7	1025000	538	1.18677e-37	8.51355e-35
13	515000	13	545000	770	1.19054e-37	8.53836e-35
3	455000	3	485000	577	1.20255e-37	8.62224e-35
1	455000	9	1255000	43	1.21353e-37	8.69866e-35
6	1195000	6	1235000	631	1.23288e-37	8.83271e-35
7	895000	7	925000	555	1.30349e-37	9.33369e-35
5	835000	5	865000	518	1.32052e-37	9.45059e-35
12	1085000	12	1115000	581	1.37205e-37	9.81681e-35
5	475000	9	1215000	61	1.41359e-37	1.01087e-34
14	1065000	5	455000	33	1.42027e-37	1.01539e-34
7	1165000	7	1215000	489	1.46243e-37	1.04498e-34
1	465000	8	305000	35	1.48214e-37	1.0585e-34
3	615000	8	315000	52	1.53247e-37	1.09416e-34
2	425000	7	775000	71	1.54382e-37	1.10169e-34
13	135000	13	175000	361	1.5504e-37	1.10609e-34
3	595000	4	655000	49	1.6021e-37	1.14208e-34
9	145000	9	185000	425	1.61219e-37	1.14897e-34
11	855000	7	835000	73	1.65894e-37	1.18198e-34
2	675000	2	705000	604	1.73444e-37	1.23544e-34
12	1855000	12	1885000	524	1.74728e-37	1.24426e-34
5	855000	5	885000	531	1.75551e-37	1.2498e-34
9	195000	9	235000	493	1.85393e-37	1.31883e-34
10	725000	10	755000	960	1.97124e-37	1.40191e-34
6	135000	6	165000	520	2.05472e-37	1.4609e-34
10	925000	2	445000	49	2.06647e-37	1.46887e-34
12	1265000	8	315000	68	2.08277e-37	1.48007e-34
7	1215000	7	1245000	547	2.12358e-37	1.50868e-34
1	455000	6	495000	47	2.12731e-37	1.51093e-34
1	425000	7	785000	73	2.2178e-37	1.57393e-34
1	465000	3	605000	46	2.21775e-37	1.57393e-34
1	495000	7	775000	64	2.22252e-37	1.5765e-34
3	925000	3	975000	516	2.29022e-37	1.6241e-34
1	435000	13	1155000	66	2.37458e-37	1.68348e-34
1	435000	11	825000	75	2.42329e-37	1.71757e-34
2	465000	4	655000	55	2.80034e-37	1.98378e-34
4	755000	4	795000	421	2.86201e-37	2.02641e-34
10	925000	12	1265000	59	2.90718e-37	2.05786e-34
2	435000	7	805000	43	2.92106e-37	2.06714e-34
6	385000	6	415000	619	2.96156e-37	2.09526e-34
9	145000	9	175000	396	3.04146e-37	2.15067e-34
12	515000	12	545000	626	3.0496e-37	2.15586e-34
4	1035000	4	1085000	529	3.09614e-37	2.18819e-34
1	435000	9	1235000	62	3.24001e-37	2.2869e-34
3	935000	3	985000	475	3.26019e-37	2.30055e-34
4	645000	8	305000	26	3.37191e-37	2.37877e-34
6	1145000	6	1265000	517	3.53062e-37	2.49009e-34
2	455000	4	655000	47	3.69467e-37	2.60377e-34
12	1395000	12	1445000	794	3.7347e-37	2.63129e-34
14	1055000	2	445000	64	3.77841e-37	2.6614e-34
4	645000	6	485000	33	3.92774e-37	2.76587e-34
6	495000	8	275000	73	3.98346e-37	2.80438e-34
10	335000	10	375000	692	4.06952e-37	2.86422e-34
10	925000	2	465000	53	4.11911e-37	2.89837e-34
13	205000	13	235000	659	4.15392e-37	2.92136e-34
12	1275000	8	285000	50	5.0524e-37	3.54957e-34
6	105000	6	155000	392	5.17669e-37	3.63595e-34
10	925000	3	595000	47	5.4716e-37	3.8421e-34
1	475000	12	1275000	50	5.56423e-37	3.90613e-34
12	1265000	7	785000	84	5.98314e-37	4.19696e-34
11	825000	2	415000	84	6.04793e-37	4.24131e-34
7	115000	7	1335000	96	6.2605e-37	4.38812e-34
11	815000	9	1225000	58	6.37528e-37	4.46743e-34
14	1085000	8	325000	69	6.6747e-37	4.67483e-34
8	95000	8	135000	325	6.79857e-37	4.76036e-34
12	465000	12	495000	658	6.83809e-37	4.7868e-34
7	1195000	7	1275000	539	6.96435e-37	4.87268e-34
2	455000	9	1255000	52	7.43512e-37	5.19938e-34
10	205000	10	245000	735	7.4445e-37	5.2046e-34
14	1055000	3	605000	56	7.65079e-37	5.34608e-34
11	815000	3	575000	68	7.73734e-37	5.40516e-34
1	295000	1	325000	541	7.85424e-37	5.48261e-34
14	1085000	2	475000	66	8.13863e-37	5.67967e-34
12	1295000	5	475000	65	8.5047e-37	5.93361e-34
13	695000	13	725000	532	8.88881e-37	6.19683e-34
7	1155000	7	1205000	642	8.90285e-37	6.20503e-34
10	945000	11	855000	70	8.98052e-37	6.25756e-34
13	1185000	4	665000	55	9.37801e-37	6.53118e-34
6	455000	7	815000	64	9.44223e-37	6.57422e-34
2	415000	7	795000	89	9.89356e-37	6.8867e-34
11	815000	7	785000	76	9.99136e-37	6.953e-34
11	25000	11	2005000	50	1.05263e-36	7.32155e-34
12	325000	12	355000	418	1.07486e-36	7.47427e-34
14	1055000	8	315000	67	1.12748e-36	7.83815e-34
12	365000	12	405000	322	1.14228e-36	7.93896e-34
11	1885000	11	1955000	556	1.21205e-36	8.42172e-34
14	1945000	14	1975000	436	1.22255e-36	8.49252e-34
6	105000	6	145000	367	1.23133e-36	8.55136e-34
10	575000	10	615000	575	1.27165e-36	8.82908e-34
4	745000	4	805000	423	1.27668e-36	8.86175e-34
10	1455000	10	1495000	367	1.28988e-36	8.95111e-34
7	825000	9	1235000	44	1.33303e-36	9.24821e-34
12	1275000	8	305000	37	1.34663e-36	9.34017e-34
3	605000	9	1245000	35	1.34884e-36	9.35307e-34
3	35000	3	1035000	55	1.35953e-36	9.42479e-34
6	555000	6	585000	738	1.40713e-36	9.75232e-34
8	1215000	8	1245000	501	1.48253e-36	1.02723e-33
13	1365000	13	1395000	570	1.48844e-36	1.03106e-33
1	405000	2	415000	83	1.5634e-36	1.08216e-33
7	545000	7	605000	232	1.59951e-36	1.10687e-33
7	835000	8	335000	70	1.60552e-36	1.11074e-33
7	1105000	7	1205000	355	1.60798e-36	1.11217e-33
10	735000	10	765000	670	1.6715e-36	1.15551e-33
4	835000	4	895000	617	1.69135e-36	1.16894e-33
1	465000	10	925000	47	1.69759e-36	1.17296e-33
9	1315000	9	1345000	524	1.71431e-36	1.1842e-33
8	325000	8	365000	574	1.71657e-36	1.18547e-33
12	2015000	12	2045000	665	1.83076e-36	1.26368e-33
14	1955000	14	1985000	635	1.89735e-36	1.30931e-33
13	1155000	5	475000	62	1.99803e-36	1.37809e-33
10	965000	2	425000	74	2.04998e-36	1.41357e-33
1	475000	5	475000	52	2.05668e-36	1.41783e-33
12	655000	12	685000	590	2.07817e-36	1.43228e-33
4	655000	9	1255000	53	2.09664e-36	1.44427e-33
11	815000	13	1195000	58	2.11961e-36	1.45973e-33
14	1085000	6	515000	66	2.13215e-36	1.46799e-33
3	625000	8	275000	75	2.13244e-36	1.46799e-33
10	775000	10	805000	495	2.17614e-36	1.49752e-33
8	315000	8	345000	617	2.30367e-36	1.58448e-33
1	455000	14	1085000	45	2.38223e-36	1.63769e-33
3	625000	7	775000	75	2.38592e-36	1.63981e-33
1	455000	5	465000	41	2.49666e-36	1.71548e-33
14	695000	14	725000	560	2.51024e-36	1.72438e-33
10	905000	2	415000	77	2.5314e-36	1.73848e-33
1	425000	2	415000	74	2.60431e-36	1.7881e-33
13	1155000	9	1225000	54	2.62428e-36	1.80136e-33
5	475000	7	775000	68	2.74633e-36	1.88466e-33
2	425000	4	655000	57	2.79917e-36	1.92044e-33
4	975000	4	1135000	91	2.81782e-36	1.93274e-33
12	1295000	14	1045000	60	2.83004e-36	1.94064e-33
5	435000	7	785000	65	2.95697e-36	2.02665e-33
11	1695000	11	1725000	480	2.98401e-36	2.04467e-33
10	925000	2	425000	55	2.98649e-36	2.04586e-33
11	815000	7	815000	63	2.99045e-36	2.04799e-33
7	815000	8	315000	59	2.99036e-36	2.04799e-33
9	795000	9	835000	473	2.99581e-36	2.05069e-33
12	465000	12	515000	514	3.0775e-36	2.10608e-33
11	815000	2	445000	58	3.08255e-36	2.109e-33
13	1185000	4	625000	52	3.43212e-36	2.3464e-33
12	1285000	4	665000	52	3.53279e-36	2.4134e-33
11	135000	11	165000	508	3.67092e-36	2.50651e-33
1	115000	1	165000	456	3.80276e-36	2.59587e-33
8	665000	8	695000	658	3.84532e-36	2.62427e-33
12	505000	12	535000	450	3.92506e-36	2.67802e-33
11	885000	11	915000	721	3.96055e-36	2.70155e-33
11	855000	2	425000	75	4.04869e-36	2.76098e-33
2	465000	3	605000	50	4.10098e-36	2.79454e-33
4	995000	4	1125000	160	4.14515e-36	2.82393e-33
1	435000	4	675000	64	4.15391e-36	2.82919e-33
11	855000	4	675000	67	4.1853e-36	2.84985e-33
10	905000	8	265000	74	4.32307e-36	2.9422e-33
3	75000	3	1035000	70	4.42928e-36	3.01297e-33
11	1345000	11	1375000	433	4.62017e-36	3.14125e-33
3	555000	3	625000	399	4.78926e-36	3.25378e-33
1	495000	4	615000	57	4.94185e-36	3.35493e-33
1	465000	14	1055000	61	5.1598e-36	3.50115e-33
11	845000	5	465000	47	5.34114e-36	3.62329e-33
5	475000	9	1235000	58	5.34424e-36	3.62448e-33
5	475000	5	505000	718	5.40507e-36	3.66483e-33
5	445000	8	255000	82	5.58467e-36	3.78377e-33
8	1125000	8	1175000	581	5.66102e-36	3.83455e-33
5	435000	9	1255000	54	5.79987e-36	3.92762e-33
2	455000	3	575000	55	5.81203e-36	3.93488e-33
11	855000	4	625000	67	5.87224e-36	3.97169e-33
5	425000	6	455000	68	5.97223e-36	4.03831e-33
9	535000	9	575000	547	5.99792e-36	4.05468e-33
11	1185000	11	1225000	654	6.22567e-36	4.20759e-33
4	395000	4	445000	473	6.28934e-36	4.24956e-33
3	545000	3	575000	597	6.36916e-36	4.30243e-33
3	585000	7	805000	43	6.66047e-36	4.49664e-33
2	485000	8	265000	75	7.29391e-36	4.91855e-33
4	55000	4	1135000	58	7.5137e-36	5.06551e-33
7	385000	7	445000	455	7.80178e-36	5.25713e-33
4	965000	4	1125000	114	7.84018e-36	5.28169e-33
10	535000	10	565000	652	7.95973e-36	5.35958e-33
1	465000	11	815000	56	8.10002e-36	5.45269e-33
13	1175000	7	835000	65	8.14194e-36	5.47955e-33
13	295000	13	325000	489	8.20775e-36	5.52248e-33
12	1275000	5	435000	54	8.21152e-36	5.52365e-33
9	235000	9	265000	609	8.23606e-36	5.53878e-33
13	1155000	14	1085000	63	8.60839e-36	5.78631e-33
1	475000	8	315000	48	9.09625e-36	6.11122e-33
14	1025000	14	1055000	741	9.12626e-36	6.12987e-33
9	155000	9	255000	372	9.21276e-36	6.18644e-33
11	815000	3	625000	72	9.53843e-36	6.40355e-33
13	335000	13	365000	596	9.74658e-36	6.54167e-33
13	1585000	13	1615000	496	1.00251e-35	6.72696e-33
1	435000	2	485000	69	1.0189e-35	6.83354e-33
5	55000	5	85000	412	1.106e-35	7.41227e-33
11	815000	14	1065000	48	1.1646e-35	7.80115e-33
2	475000	4	665000	61	1.17496e-35	7.86668e-33
11	795000	9	1255000	67	1.18122e-35	7.90663e-33
12	855000	12	885000	479	1.18123e-35	7.90663e-33
4	665000	7	795000	71	1.23339e-35	8.24769e-33
2	465000	3	565000	63	1.26064e-35	8.42786e-33
11	815000	13	1185000	55	1.34958e-35	9.02024e-33
14	3085000	14	3115000	406	1.46817e-35	9.80319e-33
10	215000	10	255000	430	1.4877e-35	9.93118e-33
7	1115000	7	1205000	441	1.55195e-35	1.0355e-32
10	765000	10	795000	762	1.55331e-35	1.03615e-32
14	1045000	5	445000	67	1.61256e-35	1.07515e-32
9	915000	9	945000	613	1.63622e-35	1.09039e-32
11	2035000	5	1335000	39	1.66188e-35	1.10695e-32
12	995000	12	1025000	428	1.67473e-35	1.11496e-32
14	1055000	5	465000	65	1.68106e-35	1.11891e-32
12	1275000	6	455000	62	1.7897e-35	1.19034e-32
8	905000	8	935000	733	1.79812e-35	1.19565e-32
4	625000	6	495000	64	1.80125e-35	1.19743e-32
1	445000	5	465000	43	1.85658e-35	1.23392e-32
3	575000	8	285000	52	1.87375e-35	1.24502e-32
13	1175000	6	455000	66	2.03623e-35	1.35232e-32
4	975000	4	1165000	116	2.07441e-35	1.37734e-32
3	575000	7	815000	64	2.08165e-35	1.38181e-32
14	2355000	14	2385000	517	2.09737e-35	1.39191e-32
1	435000	5	425000	71	2.13041e-35	1.41349e-32
1	435000	12	1255000	65	2.20661e-35	1.46369e-32
5	495000	7	835000	74	2.2405e-35	1.48472e-32
2	525000	2	555000	500	2.24232e-35	1.48556e-32
4	935000	4	1125000	154	2.24344e-35	1.48594e-32
11	1875000	11	1955000	505	2.31009e-35	1.52897e-32
13	2655000	13	2685000	442	2.35231e-35	1.55654e-32
8	275000	9	1255000	63	2.35417e-35	1.55739e-32
14	1725000	14	1765000	513	2.3914e-35	1.58087e-32
12	1655000	12	1755000	341	2.42669e-35	1.60381e-32
14	1035000	2	465000	70	2.44698e-35	1.61643e-32
1	485000	3	575000	56	2.50232e-35	1.65219e-32
13	375000	13	415000	350	2.53265e-35	1.6714e-32
14	2855000	14	2895000	334	2.55462e-35	1.68549e-32
4	625000	9	1235000	53	2.63991e-35	1.74134e-32
1	435000	3	615000	56	2.65181e-35	1.74876e-32
10	965000	14	1055000	77	2.67281e-35	1.76219e-32
9	755000	9	785000	459	2.67938e-35	1.76609e-32
8	525000	8	555000	540	2.72537e-35	1.79597e-32
6	1125000	6	1165000	711	2.72824e-35	1.79742e-32
2	425000	5	425000	69	2.76082e-35	1.81845e-32
2	475000	8	315000	58	2.77984e-35	1.83054e-32
8	1125000	8	1215000	433	2.78353e-35	1.83252e-32
6	815000	6	845000	518	2.82037e-35	1.85543e-32
3	445000	3	475000	573	2.89437e-35	1.90365e-32
4	655000	7	785000	62	3.32772e-35	2.18708e-32
2	465000	6	455000	63	3.35275e-35	2.203e-32
11	255000	11	305000	488	3.41229e-35	2.24158e-32
4	985000	4	1135000	96	3.47976e-35	2.2848e-32
9	485000	9	515000	430	3.48527e-35	2.28786e-32
13	2405000	13	2435000	587	3.51115e-35	2.30429e-32
11	825000	3	625000	76	3.75767e-35	2.46548e-32
11	25000	11	2025000	53	3.76566e-35	2.47013e-32
4	665000	9	1225000	55	4.11595e-35	2.69861e-32
10	255000	10	285000	343	4.17006e-35	2.73277e-32
9	975000	9	1005000	639	4.17147e-35	2.73303e-32
4	535000	4	615000	330	4.34219e-35	2.8442e-32
2	415000	2	505000	467	4.37956e-35	2.86799e-32
5	345000	5	395000	579	4.45184e-35	2.91462e-32
11	845000	4	635000	42	4.45655e-35	2.917e-32
6	495000	7	805000	56	4.51291e-35	2.95318e-32
12	2115000	12	2145000	497	4.56842e-35	2.98879e-32
4	635000	8	315000	50	4.64662e-35	3.03922e-32
13	1175000	8	285000	51	4.65619e-35	3.04474e-32
12	2035000	12	2075000	449	4.82344e-35	3.1526e-32
1	435000	10	915000	59	5.06469e-35	3.30868e-32
4	45000	4	1165000	53	5.21163e-35	3.40386e-32
10	965000	2	415000	84	5.22812e-35	3.41381e-32
2	475000	5	425000	64	5.33075e-35	3.47916e-32
4	55000	4	965000	62	5.44134e-35	3.55049e-32
10	925000	14	1085000	54	5.57153e-35	3.63368e-32
4	675000	7	775000	61	5.7307e-35	3.73571e-32
8	425000	8	455000	301	5.74464e-35	3.7439e-32
11	855000	5	425000	74	5.81216e-35	3.78699e-32
7	35000	7	545000	58	5.83723e-35	3.80151e-32
4	135000	4	925000	119	5.9197e-35	3.85429e-32
6	75000	6	105000	333	5.96478e-35	3.88272e-32
8	1135000	8	1215000	453	6.09719e-35	3.96796e-32
14	995000	14	1025000	809	6.11454e-35	3.9783e-32
11	845000	7	785000	56	6.28861e-35	4.09057e-32
2	375000	2	505000	351	6.67019e-35	4.33774e-32
5	445000	8	335000	77	6.86336e-35	4.46123e-32
13	235000	13	285000	491	7.2253e-35	4.69425e-32
10	965000	8	315000	65	7.24018e-35	4.7028e-32
7	535000	7	595000	172	7.3286e-35	4.75909e-32
10	925000	4	635000	44	7.48371e-35	4.85866e-32
8	85000	8	115000	586	7.72333e-35	5.01303e-32
3	1035000	8	1435000	36	7.72727e-35	5.01439e-32
11	855000	3	615000	58	7.79303e-35	5.05465e-32
1	435000	13	1145000	57	8.01492e-35	5.19733e-32
8	35000	8	1405000	63	8.10537e-35	5.25473e-32
3	755000	3	815000	511	8.10938e-35	5.25608e-32
2	435000	4	655000	42	8.31705e-35	5.38811e-32
6	635000	6	675000	517	8.38279e-35	5.42941e-32
7	1175000	7	1215000	447	8.6118e-35	5.57508e-32
4	145000	4	1095000	111	8.68034e-35	5.61677e-32
7	805000	8	285000	42	8.99125e-35	5.81243e-32
3	185000	3	215000	519	9.02896e-35	5.83542e-32
2	465000	5	435000	54	9.37675e-35	6.05876e-32
10	945000	13	1185000	52	9.82617e-35	6.34613e-32
12	1295000	2	415000	74	9.87935e-35	6.37896e-32
14	155000	14	185000	491	9.90991e-35	6.39566e-32
2	445000	5	475000	57	9.96947e-35	6.43257e-32
4	665000	7	815000	60	1.02002e-34	6.57991e-32
7	365000	7	395000	567	1.02181e-34	6.58986e-32
2	415000	4	675000	70	1.02825e-34	6.62982e-32
1	435000	6	455000	68	1.05566e-34	6.80496e-32
11	845000	9	1255000	47	1.06811e-34	6.88029e-32
13	1185000	14	1065000	41	1.11308e-34	7.1683e-32
4	775000	4	815000	586	1.12839e-34	7.2617e-32
13	385000	13	415000	504	1.1311e-34	7.27748e-32
14	205000	14	235000	433	1.14707e-34	7.37844e-32
12	2005000	12	2035000	677	1.15827e-34	7.44697e-32
13	2285000	13	2315000	415	1.18952e-34	7.6443e-32
4	665000	9	1205000	56	1.23569e-34	7.9354e-32
14	2865000	14	2895000	508	1.23818e-34	7.94949e-32
13	1155000	2	465000	58	1.36522e-34	8.75893e-32
12	335000	12	365000	465	1.36774e-34	8.77302e-32
4	175000	4	925000	137	1.39774e-34	8.96334e-32
4	335000	4	375000	427	1.4532e-34	9.31674e-32
10	915000	5	445000	61	1.49005e-34	9.54856e-32
7	1135000	7	1275000	406	1.49414e-34	9.57251e-32
13	1175000	9	1265000	50	1.50588e-34	9.64542e-32
6	495000	7	775000	70	1.56868e-34	1.00453e-31
12	1275000	13	1165000	33	1.63188e-34	1.04426e-31
1	425000	5	475000	61	1.66696e-34	1.06621e-31
4	385000	4	425000	527	1.67754e-34	1.07273e-31
5	205000	5	245000	651	1.68916e-34	1.07991e-31
14	3175000	14	3255000	111	1.71887e-34	1.09838e-31
10	865000	10	895000	386	1.735e-34	1.10843e-31
11	835000	8	285000	40	1.75023e-34	1.1179e-31
3	915000	3	955000	505	1.76865e-34	1.12939e-31
4	135000	4	935000	97	1.84375e-34	1.17652e-31
13	1165000	6	485000	29	1.85135e-34	1.18109e-31
12	1255000	3	625000	67	1.88192e-34	1.20032e-31
14	1055000	5	425000	72	1.92323e-34	1.22638e-31
3	735000	3	765000	509	2.00992e-34	1.28111e-31
11	1165000	11	1195000	431	2.03308e-34	1.29551e-31
11	1845000	11	1955000	317	2.04728e-34	1.30426e-31
11	845000	8	315000	46	2.07314e-34	1.32042e-31
4	635000	5	475000	53	2.14459e-34	1.36529e-31
4	805000	4	835000	828	2.19053e-34	1.39421e-31
1	485000	2	415000	63	2.21512e-34	1.40932e-31
3	575000	4	635000	54	2.23027e-34	1.41851e-31
14	715000	14	755000	575	2.25798e-34	1.4358e-31
12	1275000	3	615000	50	2.27702e-34	1.44756e-31
6	115000	6	145000	438	2.32362e-34	1.47685e-31
13	1065000	13	1095000	459	2.33557e-34	1.48409e-31
8	1155000	8	1185000	457	2.33753e-34	1.48499e-31
6	95000	6	1265000	115	2.37932e-34	1.51118e-31
3	395000	3	425000	628	2.40714e-34	1.5285e-31
5	495000	5	525000	591	2.46607e-34	1.56555e-31
14	1065000	3	585000	38	2.54927e-34	1.61799e-31
14	1685000	14	1735000	767	2.57788e-34	1.63539e-31
10	925000	9	1235000	46	2.64206e-34	1.67571e-31
4	625000	8	315000	55	2.65824e-34	1.68558e-31
8	1125000	8	1205000	274	2.69149e-34	1.70627e-31
11	815000	8	295000	54	2.71293e-34	1.71883e-31
3	395000	3	435000	656	2.74509e-34	1.73863e-31
11	1175000	11	1205000	544	2.75367e-34	1.74366e-31
5	425000	7	795000	74	2.7722e-34	1.75498e-31
12	1285000	4	655000	44	2.778e-34	1.75825e-31
14	1065000	3	575000	48	2.86837e-34	1.81417e-31
8	25000	8	1405000	62	2.94383e-34	1.86147e-31
6	495000	9	1265000	52	3.01126e-34	1.90366e-31
10	945000	3	615000	50	3.04555e-34	1.92489e-31
12	1265000	4	655000	58	3.08615e-34	1.9501e-31
3	585000	7	795000	55	3.2332e-34	2.04207e-31
12	1265000	2	445000	61	3.2573e-34	2.05681e-31
10	965000	7	795000	78	3.27685e-34	2.06868e-31
13	565000	13	595000	468	3.32052e-34	2.09577e-31
3	735000	3	775000	517	3.47972e-34	2.19573e-31
13	2135000	13	2165000	521	3.50282e-34	2.2098e-31
2	415000	7	845000	78	3.60757e-34	2.27536e-31
3	715000	3	755000	573	3.75137e-34	2.3655e-31
5	355000	5	395000	709	3.75521e-34	2.36738e-31
7	835000	7	865000	640	3.82744e-34	2.41235e-31
1	425000	11	815000	60	3.88709e-34	2.44938e-31
1	445000	6	455000	45	3.89227e-34	2.45208e-31
5	445000	8	265000	81	3.90081e-34	2.45688e-31
11	855000	2	455000	57	4.03801e-34	2.54271e-31
14	2735000	14	2765000	338	4.04027e-34	2.54354e-31
8	1145000	8	1195000	391	4.28923e-34	2.69778e-31
12	95000	12	125000	372	4.33644e-34	2.72684e-31
5	485000	6	495000	57	4.38099e-34	2.75422e-31
5	495000	7	785000	86	4.38707e-34	2.75741e-31
12	1295000	5	455000	38	4.45436e-34	2.79905e-31
6	1135000	6	1165000	786	4.50695e-34	2.83144e-31
2	425000	8	265000	75	4.65375e-34	2.923e-31
4	195000	4	1005000	145	4.69088e-34	2.94564e-31
8	1115000	8	1155000	420	4.85005e-34	3.04489e-31
11	825000	3	575000	69	4.86051e-34	3.05075e-31
14	1035000	7	785000	82	4.87969e-34	3.06208e-31
11	1865000	11	1905000	464	4.92483e-34	3.08969e-31
8	185000	8	215000	673	5.12223e-34	3.21205e-31
12	1275000	2	435000	46	5.15611e-34	3.23256e-31
7	115000	7	195000	317	5.24676e-34	3.28863e-31
6	825000	6	855000	577	5.34449e-34	3.34911e-31
10	925000	13	1145000	44	5.81579e-34	3.64277e-31
8	265000	8	335000	517	5.93063e-34	3.71385e-31
6	595000	6	625000	602	6.13008e-34	3.83698e-31
12	1745000	12	1775000	313	6.31834e-34	3.953e-31
11	825000	11	855000	828	6.44316e-34	4.02924e-31
11	845000	14	1085000	50	6.44437e-34	4.02924e-31
8	715000	8	745000	462	6.47184e-34	4.04531e-31
13	1205000	9	1255000	57	6.49969e-34	4.06179e-31
14	1785000	14	1825000	399	6.56912e-34	4.10329e-31
7	505000	7	535000	370	6.93247e-34	4.32727e-31
1	425000	1	485000	272	6.96834e-34	4.34866e-31
14	1085000	6	465000	43	6.98134e-34	4.35578e-31
2	465000	8	285000	48	7.13364e-34	4.44978e-31
6	455000	9	1215000	57	7.23387e-34	4.51126e-31
11	855000	8	315000	65	7.27741e-34	4.53738e-31
12	1275000	12	1305000	399	7.34468e-34	4.57827e-31
6	895000	6	925000	391	7.5159e-34	4.68285e-31
11	815000	3	605000	49	7.5627e-34	4.71093e-31
10	105000	10	135000	392	7.77029e-34	4.83913e-31
6	465000	9	1255000	40	7.98953e-34	4.97339e-31
2	295000	2	395000	360	8.05705e-34	5.01428e-31
1	435000	2	475000	64	8.10477e-34	5.04283e-31
13	2555000	13	2585000	611	8.23742e-34	5.12419e-31
3	585000	9	1255000	47	8.41223e-34	5.23054e-31
[truncated: 218,826+ more rows]
