# Supplementary material for: Three-dimensional modeling of theP. falciparumgenome during the erythrocytic cycle reveals a strong connection between genome architecture and gene expression
Source: HighWire-hosted journal article supplement (doi:10.1101/gr.169417.113), 2014-03-26
Supplement: SuppFile3.xlsx [file SuppFile3.xlsx]

## Sheet: list of immune evasion genes
Org	Chr	GeneStart	GeneEnd	ClusterID	pseudogene?	Gene ID / annotations	Color code
Pf3D7	1	29510	37126	1S		ID=PF3D7_0100100;Name=PF3D7_0100100;description=erythrocyte+membrane+protein+1%2C+PfEMP1+%28VAR%29;size=7617;web_id=PF3D7_0100100;locus_tag=PF3D7_0100100;size=7617;Alias=VAR,PfEMP1,7670005,PFA0005w,124505645,MAL1P4.01,rosetting,CAB89209.1,PF3D7_0100100,XP_001350936.1,PFA0005w,cytoadherencescheme	var gene
Pf3D7	1	38982	40207	1S		ID=PF3D7_0100200;Name=PF3D7_0100200;description=rifin+%28RIF%29;size=1226;web_id=PF3D7_0100200;locus_tag=PF3D7_0100200;size=1226;Alias=RIF,7670006,PFA0010c,124505647,MAL1P4.02,rosetting,CAB89210.1,PF3D7_0100200,XP_001350937.1,PFA0010c,cytoadherencescheme	rifin gene
Pf3D7	1	42367	46507	1S		ID=PF3D7_0100300;Name=PF3D7_0100300;description=var-like+erythrocyte+membrane+protein+1;size=4141;web_id=PF3D7_0100300;locus_tag=PF3D7_0100300;size=4141;Alias=PfEMP1,7670007,PFA0015c,124505649,MAL1P4.03,rosetting,CAB89211.1,PF3D7_0100300,XP_001350938.1,PFA0015c,cytoadherencescheme	stevor gene
Pf3D7	1	50363	51636	1S		ID=PF3D7_0100400;Name=PF3D7_0100400;description=rifin+%28RIF%29;size=1274;web_id=PF3D7_0100400;locus_tag=PF3D7_0100400;size=1274;Alias=RIF,7670008,PFA0020w,124505651,MAL1P4.04,rosetting,CAB89212.1,PF3D7_0100400,XP_001350939.1,PFA0020w,cytoadherencescheme	Pfmc-2tmgene
Pf3D7	1	53169	53280	1S	pseudo	ID=PF3D7_0100500;Name=PF3D7_0100500;description=erythrocyte+membrane+protein+1+%28PfEMP1%29%2C+exon1%2C+pseudogene+%28var+pseudogene%29;size=112;web_id=PF3D7_0100500;locus_tag=PF3D7_0100500;size=112;Alias=PFA0025c,MAL1P4.05,rosetting,PF3D7_0100500,PFA0025c,var pseudogene,cytoadherencescheme	-
Pf3D7	1	53778	55006	1S		ID=PF3D7_0100600;Name=PF3D7_0100600;description=rifin+%28RIF%29;size=1229;web_id=PF3D7_0100600;locus_tag=PF3D7_0100600;size=1229;Alias=RIF,7670010,PFA0030c,124505653,MAL1P4.06,rosetting,CAB89214.1,PF3D7_0100600,XP_001350940.1,PFA0030c,cytoadherencescheme	-
Pf3D7	1	59772	61003	1S		ID=PF3D7_0100800;Name=PF3D7_0100800;description=rifin+%28RIF%29;size=1232;web_id=PF3D7_0100800;locus_tag=PF3D7_0100800;size=1232;Alias=RIF,7670012,PFA0040w,124505657,MAL1P4.07,rosetting,CAB89216.1,PF3D7_0100800,XP_001350942.1,PFA0040w,cytoadherencescheme	-
Pf3D7	1	62187	63400	1S		ID=PF3D7_0100900;Name=PF3D7_0100900;description=rifin+%28RIF%29;size=1214;web_id=PF3D7_0100900;locus_tag=PF3D7_0100900;size=1214;Alias=RIF,7670013,PFA0045c,124505659,MAL1P4.08,rosetting,CAB89217.1,PF3D7_0100900,XP_001350943.1,PFA0045c,cytoadherencescheme	-
Pf3D7	1	65817	66989	1S		ID=PF3D7_0101000;Name=PF3D7_0101000;description=rifin+%28RIF%29;size=1173;web_id=PF3D7_0101000;locus_tag=PF3D7_0101000;size=1173;Alias=RIF,PFA0050c,224591362,296004460,MAL1P1.9a,rosetting,CAX51180.1,PF3D7_0101000,XP_002808598.1,PFA0050c,cytoadherencescheme	-
Pf3D7	1	74563	75366	1S		ID=PF3D7_0101300;Name=PF3D7_0101300;description=Pfmc-2TM+Maurer%27s+cleft+two+transmembrane+protein+%28MC-2TM%29;size=804;web_id=PF3D7_0101300;locus_tag=PF3D7_0101300;size=804;Alias=MC-2TM,MCprot,MAL1P1.4,PFA0065w,224591363,296004462,CAX51181.1,PF3D7_0101300,XP_002808599.1,PFA0065w	-
Pf3D7	1	78241	79891	1S	pseudo	ID=PF3D7_0101500;Name=PF3D7_0101500;description=erythrocyte+membrane+protein+1+%28PfEMP1%29%2C+exon2%2C+pseudogene+%28var+%28pseudogene%29%29;size=1651;web_id=PF3D7_0101500;locus_tag=PF3D7_0101500;size=1651;Alias=MAL1P1.6,PFA0075w,PF3D7_0101500,PFA0075w,var (pseudogene)	-
Pf3D7	1	81765	83106	1S		ID=PF3D7_0101600;Name=PF3D7_0101600;description=rifin+%28RIF%29;size=1342;web_id=PF3D7_0101600;locus_tag=PF3D7_0101600;size=1342;Alias=RIF,23510592,MAL1P1.7,PFA0080c,124505671,rosetting,CAD48976.1,PF3D7_0101600,XP_001350949.1,PFA0080c,cytoadherencescheme	-
Pf3D7	1	84791	86152	1S	pseudo	ID=PF3D7_0101700;Name=PF3D7_0101700;description=erythrocyte+membrane+protein+1+%28PfEMP1%29%2C+exon2%2C+pseudogene+%28var+pseudogene%29;size=1362;web_id=PF3D7_0101700;locus_tag=PF3D7_0101700;size=1362;Alias=MAL1P1.8,PFA0085c,rosetting,PF3D7_0101700,PFA0085c,var pseudogene,cytoadherencescheme	-
Pf3D7	1	87203	88177	1S		ID=PF3D7_0101800;Name=PF3D7_0101800;description=stevor;size=975;web_id=PF3D7_0101800;locus_tag=PF3D7_0101800;size=975;Alias=23510593,PFA0090c,124505673,MAL1P1.9b,rosetting,CAD48978.1,PF3D7_0101800,XP_001350950.1,PFA0090c,cytoadherencescheme	-
Pf3D7	1	90242	91420	1S		ID=PF3D7_0101900;Name=PF3D7_0101900;description=rifin+%28RIF%29;size=1179;web_id=PF3D7_0101900;locus_tag=PF3D7_0101900;size=1179;Alias=RIF,23510594,PFA0095c,124505675,MAL1P1.10,rosetting,CAD48979.1,PF3D7_0101900,XP_001350951.1,PFA0095c,cytoadherencescheme	-
Pf3D7	1	95050	95899	1S	pseudo	ID=PF3D7_0102100;Name=PF3D7_0102100;description=stevor%2C+pseudogene;size=850;web_id=PF3D7_0102100;locus_tag=PF3D7_0102100;size=850;Alias=PFA0105w,rosetting,MAL1P1.11a,PF3D7_0102100,PFA0105w,cytoadherencescheme	-
Pf3D7	1	547597	548380	1E		ID=PF3D7_0114100;Name=PF3D7_0114100;description=Pfmc-2TM+Maurer%27s+cleft+two+transmembrane+protein+%28MC-2TM%29;size=784;web_id=PF3D7_0114100;locus_tag=PF3D7_0114100;size=784;Alias=MC-2TM,MCprot,Maurer,PFA0680c,224591381,296004498,MAL1P4.14,CAX51197.1,PF3D7_0114100,XP_002808615.1,PFA0680c	-
Pf3D7	1	560474	561534	1E	pseudo	ID=PF3D7_0114600;Name=PF3D7_0114600;description=stevor%2C+pseudogene;size=1061;web_id=PF3D7_0114600;locus_tag=PF3D7_0114600;size=1061;Alias=PFA0705c,rosetting,MAL1P4.16e,PF3D7_0114600,apicoplastgene,PFA0705c,cytoadherencescheme	-
Pf3D7	1	563703	564842	1E		ID=PF3D7_0114700;Name=PF3D7_0114700;description=rifin;size=1140;web_id=PF3D7_0114700;locus_tag=PF3D7_0114700;size=1140;Alias=23476998,PFA0710c,124505911,MAL1P4.17,rosetting,CAD48958.1,PF3D7_0114700,XP_001351069.1,PFA0710c,cytoadherencescheme	-
Pf3D7	1	591849	593187	1E		ID=PF3D7_0115200;Name=PF3D7_0115200;description=rifin+%28RIF%29;size=1339;web_id=PF3D7_0115200;locus_tag=PF3D7_0115200;size=1339;Alias=RIF,23477004,PFA0740w,124505923,MAL1P4.23,rosetting,CAD48964.1,PF3D7_0115200,XP_001351075.1,PFA0740w,cytoadherencescheme	-
Pf3D7	1	595102	596273	1E		ID=PF3D7_0115300;Name=PF3D7_0115300;description=rifin+%28RIF%29;size=1172;web_id=PF3D7_0115300;locus_tag=PF3D7_0115300;size=1172;Alias=RIF,23477005,PFA0745w,124505925,MAL1P4.25,rosetting,CAD48965.1,PF3D7_0115300,XP_001351076.1,PFA0745w,cytoadherencescheme	-
Pf3D7	1	598465	599472	1E		ID=PF3D7_0115400;Name=PF3D7_0115400;description=stevor+%28stevor%29;size=1008;web_id=PF3D7_0115400;locus_tag=PF3D7_0115400;size=1008;Alias=stevor,23477006,PFA0750w,124505927,MAL1P4.26,rosetting,CAD48966.1,PF3D7_0115400,XP_001351077.1,apicoplastgene,PFA0750w,cytoadherencescheme	-
Pf3D7	1	604162	605531	1E		ID=PF3D7_0115600;Name=PF3D7_0115600;description=rifin+%28RIF%29;size=1370;web_id=PF3D7_0115600;locus_tag=PF3D7_0115600;size=1370;Alias=RIF,23477007,PFA0760w,124505929,MAL1P4.28,rosetting,CAD48968.1,PF3D7_0115600,XP_001351078.1,PFA0760w,cytoadherencescheme	-
Pf3D7	1	607390	614893	1E		ID=PF3D7_0115700;Name=PF3D7_0115700;description=erythrocyte+membrane+protein+1%2C+PfEMP1+%28VAR%29;size=7504;web_id=PF3D7_0115700;locus_tag=PF3D7_0115700;size=7504;Alias=VAR,PfEMP1,23477008,PFA0765c,124505931,MAL1P4.29,rosetting,CAD48969.1,PF3D7_0115700,XP_001351079.1,PFA0765c,cytoadherencescheme	-
Pf3D7	2	25232	31168	2S		ID=PF3D7_0200100;Name=PF3D7_0200100;description=erythrocyte+membrane+protein+1%2C+PfEMP1+%28VAR%29;size=5937;web_id=PF3D7_0200100;locus_tag=PF3D7_0200100;size=5937;Alias=VAR,812597,O96108,PfEMP1,3845071,9230440,9291676,9786187,9804551,11316367,11420100,12368864,PFB0010w,124775746,PF02_0001,rosetting,AAC71792.1,PF3D7_0200100,XP_001349515.1,cytoadherencescheme	-
Pf3D7	2	33030	34259	2S		ID=PF3D7_0200200;Name=PF3D7_0200200;description=rifin+%28RIF%29;size=1230;web_id=PF3D7_0200200;locus_tag=PF3D7_0200200;size=1230;Alias=RIF,812598,O96109,3845072,9804551,10430943,12368864,PFB0015c,124799935,PF02_0002,rosetting,AAC71793.1,PF3D7_0200200,XP_001349516.1,PFB0015c,cytoadherencescheme	-
Pf3D7	2	38287	39303	2S		ID=PF3D7_0200400;Name=PF3D7_0200400;description=stevor;size=1017;web_id=PF3D7_0200400;locus_tag=PF3D7_0200400;size=1017;Alias=812600,O96111,3845075,9804551,12368864,12477793,PFB0025c,124799942,PF02_0004,rosetting,AAC71795.1,PF3D7_0200400,XP_001349518.1,apicoplastgene,PFB0025c,cytoadherencescheme	-
Pf3D7	2	41515	42858	2S		ID=PF3D7_0200500;Name=PF3D7_0200500;description=rifin+%28RIF%29;size=1344;web_id=PF3D7_0200500;locus_tag=PF3D7_0200500;size=1344;Alias=RIF,812601,O96112,3845076,9804551,10430943,12368864,PFB0030c,124799944,PF02_0005,rosetting,AAC71796.1,PF3D7_0200500,XP_001349519.1,PFB0030c,cytoadherencescheme	-
Pf3D7	2	45286	46558	2S		ID=PF3D7_0200600;Name=PF3D7_0200600;description=rifin+%28RIF%29;size=1273;web_id=PF3D7_0200600;locus_tag=PF3D7_0200600;size=1273;Alias=RIF,812602,O96113,9804551,10430943,12368864,PFB0035c,254688439,258596850,PF02_0006,rosetting,AAC71797.3,PF3D7_0200600,XP_001349520.2,apicoplastgene,PFB0035c,cytoadherencescheme	-
Pf3D7	2	48923	50147	2S		ID=PF3D7_0200700;Name=PF3D7_0200700;description=rifin+%28RIF%29;size=1225;web_id=PF3D7_0200700;locus_tag=PF3D7_0200700;size=1225;Alias=RIF,812603,O96114,3845078,9804551,10430943,12368864,PFB0040c,124799951,PF02_0007,rosetting,AAC71798.1,PF3D7_0200700,XP_001349521.1,PFB0040c,cytoadherencescheme	-
Pf3D7	2	54254	55255	2S	pseudo	ID=PF3D7_0200900;Name=PF3D7_0200900;description=stevor%2C+pseudogene;size=1002;web_id=PF3D7_0200900;locus_tag=PF3D7_0200900;size=1002;Alias=812605,12477793,PFB0050c,PF02_0009,rosetting,PF3D7_0200900,PFB0050c,cytoadherencescheme	-
Pf3D7	2	57344	58421	2S		ID=PF3D7_0201000;Name=PF3D7_0201000;description=rifin+%28RIF%29;size=1078;web_id=PF3D7_0201000;locus_tag=PF3D7_0201000;size=1078;Alias=RIF,812606,O96116,3845082,9804551,10430943,12368864,PFB0055c,124800659,PF02_0010,rosetting,AAC71801.1,PF3D7_0201000,XP_001349524.1,apicoplastgene,PFB0055c,cytoadherencescheme	-
Pf3D7	2	63157	64376	2S		ID=PF3D7_0201200;Name=PF3D7_0201200;description=rifin+%28RIF%29;size=1220;web_id=PF3D7_0201200;locus_tag=PF3D7_0201200;size=1220;Alias=RIF,812608,O96117,9804551,10430943,12368864,PFB0060w,254688440,258596852,PF02_0012,rosetting,AAC71802.3,PF3D7_0201200,XP_001349526.2,PFB0060w,cytoadherencescheme	-
Pf3D7	2	66529	67545	2S		ID=PF3D7_0201300;Name=PF3D7_0201300;description=stevor;size=1017;web_id=PF3D7_0201300;locus_tag=PF3D7_0201300;size=1017;Alias=812609,O96118,9804551,12368864,12477793,PFB0065w,254688441,258596854,PF02_0013,rosetting,AAC71803.3,PF3D7_0201300,XP_001349527.2,PFB0065w,cytoadherencescheme	-
Pf3D7	2	860466	861504	2E		ID=PF3D7_0221400;Name=PF3D7_0221400;description=stevor;size=1039;web_id=PF3D7_0221400;locus_tag=PF3D7_0221400;size=1039;Alias=812795,O96283,9804551,12368864,12477793,PFB0955w,254688496,258596945,PF02_0199,rosetting,AAC71980.3,PF3D7_0221400,XP_001349713.2,apicoplastgene,PFB0955w,cytoadherencescheme	-
Pf3D7	2	863079	863842	2E	pseudo	ID=PF3D7_0221500;Name=PF3D7_0221500;description=Pfmc-2TM+Maurer%27s+cleft+two+transmembrane+protein%2C+pseudogene;size=764;web_id=PF3D7_0221500;locus_tag=PF3D7_0221500;size=764;Alias=812796,MCprot,PFB0960c,PF02_0200,PF3D7_0221500,PFB0960c	-
Pf3D7	2	878468	879251	2E		ID=PF3D7_0222100;Name=PF3D7_0222100;description=Pfmc-2TM+Maurer%27s+cleft+two+transmembrane+protein+%28MC-2TM%29;size=784;web_id=PF3D7_0222100;locus_tag=PF3D7_0222100;size=784;Alias=812805,MC-2TM,MCprot,O96287,23503457,PFB0985c,124801537,PF02_0209,AAC71985.2,PF3D7_0222100,XP_001349723.1,PFB0985c	-
Pf3D7	2	886625	887802	2E	pseudo	ID=PF3D7_0222400;Name=PF3D7_0222400;description=rifin%2C+pseudogene+%28RIF+pseudogene%29;size=1178;web_id=PF3D7_0222400;locus_tag=PF3D7_0222400;size=1178;Alias=812808,10430943,PFB1000w,PF02_0212,rosetting,PF3D7_0222400,RIF pseudogene,PFB1000w,cytoadherencescheme	-
Pf3D7	2	889660	890745	2E		ID=PF3D7_0222500;Name=PF3D7_0222500;description=rifin+%28RIF%29;size=1086;web_id=PF3D7_0222500;locus_tag=PF3D7_0222500;size=1086;Alias=RIF,812809,O96288,3845333,9804551,10430943,12368864,PFB1005w,124801551,PF02_0213,rosetting,AAC71988.1,PF3D7_0222500,XP_001349727.1,PFB1005w,cytoadherencescheme	-
Pf3D7	2	892856	894206	2E		ID=PF3D7_0222600;Name=PF3D7_0222600;description=rifin+%28RIF%29;size=1351;web_id=PF3D7_0222600;locus_tag=PF3D7_0222600;size=1351;Alias=RIF,812810,O96289,3845334,9804551,10430943,12368864,PFB1010w,124801555,PF02_0214,rosetting,AAC71989.1,PF3D7_0222600,XP_001349728.1,PFB1010w,cytoadherencescheme	-
Pf3D7	2	896226	897420	2E		ID=PF3D7_0222700;Name=PF3D7_0222700;description=rifin+%28RIF%29;size=1195;web_id=PF3D7_0222700;locus_tag=PF3D7_0222700;size=1195;Alias=RIF,812811,O96290,3845335,9804551,10430943,12368864,PFB1015w,124801558,PF02_0215,rosetting,AAC71990.1,PF3D7_0222700,XP_001349729.1,PFB1015w,cytoadherencescheme	-
Pf3D7	2	899430	900445	2E		ID=PF3D7_0222800;Name=PF3D7_0222800;description=stevor;size=1016;web_id=PF3D7_0222800;locus_tag=PF3D7_0222800;size=1016;Alias=812812,O96291,9804551,12368864,PFB1020w,254688498,258596949,PF02_0216,rosetting,AAC71991.3,PF3D7_0222800,XP_001349730.2,apicoplastgene,PFB1020w,cytoadherencescheme	-
Pf3D7	2	904551	905775	2E		ID=PF3D7_0223100;Name=PF3D7_0223100;description=rifin+%28RIF%29;size=1225;web_id=PF3D7_0223100;locus_tag=PF3D7_0223100;size=1225;Alias=RIF,812815,O96292,9804551,10430943,12368864,PFB1035w,254688499,258596951,PF02_0219,rosetting,AAC71992.3,PF3D7_0223100,XP_001349733.2,PFB1035w,cytoadherencescheme	-
Pf3D7	2	907678	908861	2E		ID=PF3D7_0223200;Name=PF3D7_0223200;description=rifin+%28RIF%29;size=1184;web_id=PF3D7_0223200;locus_tag=PF3D7_0223200;size=1184;Alias=RIF,812816,O96293,3845339,9804551,10430943,12368864,PFB1040w,124801575,PF02_0220,rosetting,AAC71993.1,PF3D7_0223200,XP_001349734.1,PFB1040w,cytoadherencescheme	-
Pf3D7	2	913244	914457	2E		ID=PF3D7_0223400;Name=PF3D7_0223400;description=rifin+%28RIF%29;size=1214;web_id=PF3D7_0223400;locus_tag=PF3D7_0223400;size=1214;Alias=RIF,812818,O96295,3845342,9804551,10430943,12368864,PFB1050w,124801581,PF02_0222,rosetting,AAC71995.1,PF3D7_0223400,XP_001349736.1,PFB1050w,cytoadherencescheme	-
Pf3D7	2	916352	923648	2E		ID=PF3D7_0223500;Name=PF3D7_0223500;description=erythrocyte+membrane+protein+1%2C+PfEMP1+%28VAR%29;size=7297;web_id=PF3D7_0223500;locus_tag=PF3D7_0223500;size=7297;Alias=VAR,812819,O96296,PfEMP1,9230440,9291676,9786187,9804551,11316367,11420100,12368864,PFB1055c,254688500,258596953,PF02_0223,rosetting,AAC71996.3,PF3D7_0223500,XP_001349737.2,PFB1055c,cytoadherencescheme	-
Pf3D7	3	36965	44482	3S		ID=PF3D7_0300100;Name=PF3D7_0300100;description=erythrocyte+membrane+protein+1%2C+PfEMP1+%28VAR%29;size=7518;web_id=PF3D7_0300100;locus_tag=PF3D7_0300100;size=7518;Alias=VAR,814321,O97324,PfEMP1,7264037,MAL3P8.1,PFC0005w,124504675,rosetting,CAB39115.2,PF3D7_0300100,XP_001351080.1,PFC0005w,cytoadherencescheme	-
Pf3D7	3	46369	47579	3S		ID=PF3D7_0300200;Name=PF3D7_0300200;description=rifin+%28RIF%29;size=1211;web_id=PF3D7_0300200;locus_tag=PF3D7_0300200;size=1211;Alias=RIF,814322,O97325,4494021,MAL3P8.2,PFC0010c,124504677,rosetting,CAB39116.1,PF3D7_0300200,XP_001351081.1,PFC0010c,cytoadherencescheme	-
Pf3D7	3	49772	51152	3S	pseudo	ID=PF3D7_0300300;Name=PF3D7_0300300;description=erythrocyte+membrane+protein+1+%28PfEMP1%29%2C+exon2%2C+pseudogene+%28VAR+pseudogene%29;size=1381;web_id=PF3D7_0300300;locus_tag=PF3D7_0300300;size=1381;Alias=814323,PFC0015c,rosetting,PF3D7_0300300,VAR pseudogene,PFC0015c,cytoadherencescheme	-
Pf3D7	3	52280	53273	3S		ID=PF3D7_0300400;Name=PF3D7_0300400;description=stevor;size=994;web_id=PF3D7_0300400;locus_tag=PF3D7_0300400;size=994;Alias=814324,Q9U5L9,4494022,MAL3P8.4,PFC0025c,124504679,rosetting,CAB39117.1,PF3D7_0300400,XP_001351082.1,PFC0025c,cytoadherencescheme	-
Pf3D7	3	55390	56584	3S		ID=PF3D7_0300500;Name=PF3D7_0300500;description=rifin+%28RIF%29;size=1195;web_id=PF3D7_0300500;locus_tag=PF3D7_0300500;size=1195;Alias=RIF,814325,O97326,4494023,MAL3P8.5,PFC0030c,124504681,rosetting,CAB39118.1,PF3D7_0300500,XP_001351083.1,PFC0030c,cytoadherencescheme	-
Pf3D7	3	61445	62714	3S		ID=PF3D7_0300700;Name=PF3D7_0300700;description=rifin+%28RIF%29;size=1270;web_id=PF3D7_0300700;locus_tag=PF3D7_0300700;size=1270;Alias=RIF,814326,O97327,MAL3P8.6,PFC0035w,rosetting,PF3D7_0300700,PFC0035w,cytoadherencescheme	-
Pf3D7	3	64572	65783	3S		ID=PF3D7_0300800;Name=PF3D7_0300800;description=rifin+%28RIF%29;size=1212;web_id=PF3D7_0300800;locus_tag=PF3D7_0300800;size=1212;Alias=RIF,O97328,4494025,4794143,MAL3P8.7,PFC0040w,124504685,rosetting,CAB39120.1,PF3D7_0300800,XP_001351085.1,apicoplastgene,PFC0040w,cytoadherencescheme	-
Pf3D7	3	67928	68682	3S		ID=PF3D7_0300900;Name=PF3D7_0300900;description=stevor-like;size=755;web_id=PF3D7_0300900;locus_tag=PF3D7_0300900;size=755;Alias=814327,O97329,MAL3P8.8,PFC0045w,rosetting,PF3D7_0300900,apicoplastgene,PFC0045w,cytoadherencescheme	-
Pf3D7	3	1002872	1004267	3E	pseudo	ID=PF3D7_0323900;Name=PF3D7_0323900;description=erythrocyte+membrane+protein+1+%28PfEMP1%29%2C+exon2%2C+pseudogene+%28VAR+pseudogene%29;size=1396;web_id=PF3D7_0323900;locus_tag=PF3D7_0323900;size=1396;Alias=9221785,PFC1070c,MAL3P7.45,rosetting,PF3D7_0323900,VAR pseudogene,PFC1070c,cytoadherencescheme	-
Pf3D7	3	1007413	1008202	3E		ID=PF3D7_0324100;Name=PF3D7_0324100;description=Pfmc-2TM+Maurer%27s+cleft+two+transmembrane+protein+%28MC-2TM%29;size=790;web_id=PF3D7_0324100;locus_tag=PF3D7_0324100;size=790;Alias=814556,MC-2TM,MCprot,O97307,4493995,PFC1080c,124505139,MAL3P7.47,CAB39054.1,PF3D7_0324100,XP_001351311.1,PFC1080c	-
Pf3D7	3	1015795	1016942	3E		ID=PF3D7_0324400;Name=PF3D7_0324400;description=rifin+%283D7-rifT3-5%29+%28RIF%29;size=1148;web_id=PF3D7_0324400;locus_tag=PF3D7_0324400;size=1148;Alias=RIF,814559,O97309,4493998,PFC1095w,124505145,MAL3P7.50,rosetting,CAB39057.1,PF3D7_0324400,XP_001351314.1,PFC1095w,cytoadherencescheme	-
Pf3D7	3	1018874	1019973	3E		ID=PF3D7_0324500;Name=PF3D7_0324500;description=rifin+%28RIF%29;size=1100;web_id=PF3D7_0324500;locus_tag=PF3D7_0324500;size=1100;Alias=RIF,814560,O97310,4493999,PFC1100w,124505147,MAL3P7.51,rosetting,CAB39058.1,PF3D7_0324500,XP_001351315.1,PFC1100w,cytoadherencescheme	-
Pf3D7	3	1021998	1023008	3E		ID=PF3D7_0324600;Name=PF3D7_0324600;description=stevor+%283D7-stevorT3-2%29+%28stevor%29;size=1011;web_id=PF3D7_0324600;locus_tag=PF3D7_0324600;size=1011;Alias=814561,Q9U5M0,stevor,4494000,PFC1105w,124505149,MAL3P7.52,rosetting,CAB39059.1,PF3D7_0324600,XP_001351316.1,PFC1105w,cytoadherencescheme	-
Pf3D7	3	1024030	1025411	3E	pseudo	ID=PF3D7_0324700;Name=PF3D7_0324700;description=erythrocyte+membrane+protein+1+%28PfEMP1%29%2C+exon2%2C+pseudogene+%28VAR+pseudogene%29;size=1382;web_id=PF3D7_0324700;locus_tag=PF3D7_0324700;size=1382;Alias=814562,PFC1110w,rosetting,PF3D7_0324700,VAR pseudogene,PFC1110w,cytoadherencescheme	-
Pf3D7	3	1027571	1028929	3E		ID=PF3D7_0324800;Name=PF3D7_0324800;description=rifin+%28rifin+%283D7-rifT3-7%29%29;size=1359;web_id=PF3D7_0324800;locus_tag=PF3D7_0324800;size=1359;Alias=814563,O97311,4494001,PFC1115w,124505151,MAL3P7.54,rosetting,CAB39060.1,PF3D7_0324800,XP_001351317.1,PFC1115w,cytoadherencescheme,rifin (3D7-rifT3-7)	-
Pf3D7	3	1030822	1038254	3E		ID=PF3D7_0324900;Name=PF3D7_0324900;description=erythrocyte+membrane+protein+1%2C+PfEMP1+%28VAR%29;size=7433;web_id=PF3D7_0324900;locus_tag=PF3D7_0324900;size=7433;Alias=VAR,814564,O97312,PfEMP1,4494002,PFC1120c,124505153,MAL3P7.55,rosetting,CAB39061.1,PF3D7_0324900,XP_001351318.1,PFC1120c,cytoadherencescheme	-
Pf3D7	4	28706	37677	4S		ID=PF3D7_0400100;Name=PF3D7_0400100;description=erythrocyte+membrane+protein+1%2C+PfEMP1+%28VAR%29;size=8972;web_id=PF3D7_0400100;locus_tag=PF3D7_0400100;size=8972;Alias=VAR,812552,PfEMP1,Q8I220,23498127,MAL4P1.1,PFD0005w,124505155,rosetting,CAD49094.1,PF3D7_0400100,XP_001351319.1,PFD0005w,cytoadherencescheme	-
Pf3D7	4	42032	43374	4S		ID=PF3D7_0400300;Name=PF3D7_0400300;description=rifin+%28RIF%29;size=1343;web_id=PF3D7_0400300;locus_tag=PF3D7_0400300;size=1343;Alias=RIF,812550,Q8I219,23498128,MAL4P1.3,PFD0015c,124505157,rosetting,CAD49095.1,PF3D7_0400300,XP_001351320.1,PFD0015c,cytoadherencescheme	-
Pf3D7	4	45555	56860	4S		ID=PF3D7_0400400;Name=PF3D7_0400400;description=erythrocyte+membrane+protein+1%2C+PfEMP1+%28VAR%29;size=11306;web_id=PF3D7_0400400;locus_tag=PF3D7_0400400;size=11306;Alias=VAR,812551,PfEMP1,Q8I218,23498129,MAL4P1.4,PFD0020c,124505159,rosetting,CAD49096.1,PF3D7_0400400,XP_001351321.1,PFD0020c,cytoadherencescheme	-
Pf3D7	4	59636	60939	4S		ID=PF3D7_0400500;Name=PF3D7_0400500;description=rifin+%28RIF%29;size=1304;web_id=PF3D7_0400500;locus_tag=PF3D7_0400500;size=1304;Alias=RIF,812548,Q8I217,23498130,MAL4P1.5,PFD0025w,124505161,rosetting,CAD49097.1,PF3D7_0400500,XP_001351322.1,PFD0025w,cytoadherencescheme	-
Pf3D7	4	63104	64476	4S		ID=PF3D7_0400700;Name=PF3D7_0400700;description=rifin+%28RIF%29;size=1373;web_id=PF3D7_0400700;locus_tag=PF3D7_0400700;size=1373;Alias=RIF,812549,Q8I216,23498131,MAL4P1.6,PFD0030c,124505163,rosetting,CAD49098.1,PF3D7_0400700,XP_001351323.1,PFD0030c,cytoadherencescheme	-
Pf3D7	4	66601	67573	4S		ID=PF3D7_0400800;Name=PF3D7_0400800;description=stevor;size=973;web_id=PF3D7_0400800;locus_tag=PF3D7_0400800;size=973;Alias=812539,Q8I215,23498132,MAL4P1.7,PFD0035c,124505165,rosetting,CAD49099.1,PF3D7_0400800,XP_001351324.1,PFD0035c,cytoadherencescheme	-
Pf3D7	4	69961	71113	4S		ID=PF3D7_0400900;Name=PF3D7_0400900;description=rifin+%28RIF%29;size=1153;web_id=PF3D7_0400900;locus_tag=PF3D7_0400900;size=1153;Alias=RIF,812536,Q8I214,23498133,MAL4P1.8,PFD0040c,124505167,rosetting,CAD49100.1,PF3D7_0400900,XP_001351325.1,PFD0040c,cytoadherencescheme	-
Pf3D7	4	73268	74340	4S		ID=PF3D7_0401000;Name=PF3D7_0401000;description=rifin+%28RIF%29;size=1073;web_id=PF3D7_0401000;locus_tag=PF3D7_0401000;size=1073;Alias=RIF,Q8I213,4794146,23498134,MAL4P1.9,PFD0045c,124505169,rosetting,CAD49101.1,PF3D7_0401000,XP_001351326.1,PFD0045c,cytoadherencescheme	-
Pf3D7	4	79193	80451	4S		ID=PF3D7_0401200;Name=PF3D7_0401200;description=rifin+%28RIF%29;size=1259;web_id=PF3D7_0401200;locus_tag=PF3D7_0401200;size=1259;Alias=RIF,Q8I212,4794149,23498135,PFD0050w,124505171,MAL4P1.10,rosetting,CAD49102.1,PF3D7_0401200,XP_001351327.1,PFD0050w,cytoadherencescheme	-
Pf3D7	4	82247	83575	4S		ID=PF3D7_0401300;Name=PF3D7_0401300;description=rifin+%28RIF%29;size=1329;web_id=PF3D7_0401300;locus_tag=PF3D7_0401300;size=1329;Alias=RIF,Q8I211,4794150,23498136,PFD0055w,124505173,MAL4P1.11,rosetting,CAD49103.1,PF3D7_0401300,XP_001351328.1,PFD0055w,cytoadherencescheme	-
Pf3D7	4	85397	86608	4S		ID=PF3D7_0401400;Name=PF3D7_0401400;description=rifin+%28RIF%29;size=1212;web_id=PF3D7_0401400;locus_tag=PF3D7_0401400;size=1212;Alias=RIF,Q8I210,4794147,23498137,PFD0060w,124505175,MAL4P1.12,rosetting,CAD49104.1,PF3D7_0401400,XP_001351329.1,PFD0060w,cytoadherencescheme	-
Pf3D7	4	89153	90184	4S	pseudo	ID=PF3D7_0401500;Name=PF3D7_0401500;description=stevor%2C+pseudogene;size=1032;web_id=PF3D7_0401500;locus_tag=PF3D7_0401500;size=1032;Alias=812535,PFD0065w,MAL4P1.13,rosetting,PF3D7_0401500,PFD0065w,cytoadherencescheme	-
Pf3D7	4	92576	93809	4S		ID=PF3D7_0401600.1;Name=PF3D7_0401600.1;description=rifin+%28RIF%29;size=1234;web_id=PF3D7_0401600.1;locus_tag=PF3D7_0401600.1;size=1234;Alias=RIF,812534,Q8I209,23498138,PFD0070c,124505177,MAL4P1.14,rosetting,CAD49106.1,XP_001351330.1,apicoplastgene,PFD0070c,PF3D7_0401600.1,cytoadherencescheme	-
Pf3D7	4	92576	93809	4S		ID=PF3D7_0401600.2;Name=PF3D7_0401600.2;description=rifin;size=1234;web_id=PF3D7_0401600.2;locus_tag=PF3D7_0401600.2;size=1234;Alias=PF3D7_0401600.2	-
Pf3D7	4	155877	156984	4M1	pseudo	ID=PF3D7_0402500;Name=PF3D7_0402500;description=rifin%2C+pseudogene;size=1108;web_id=PF3D7_0402500;locus_tag=PF3D7_0402500;size=1108;Alias=812507,PFD0120w,MAL4P1.24,rosetting,PF3D7_0402500,PFD0120w,cytoadherencescheme	-
Pf3D7	4	159279	160314	4M1		ID=PF3D7_0402600;Name=PF3D7_0402600;description=stevor;size=1036;web_id=PF3D7_0402600;locus_tag=PF3D7_0402600;size=1036;Alias=812506,Q8I201,23498147,PFD0125c,PFD0130c,124505195,MAL4P1.26,rosetting,CAD49117.1,PF3D7_0402600,XP_001351339.1,apicoplastgene,PFD0125c,cytoadherencescheme	-
Pf3D7	4	162511	163724	4M1	pseudo	ID=PF3D7_0402700;Name=PF3D7_0402700;description=rifin%2C+pseudogene;size=1214;web_id=PF3D7_0402700;locus_tag=PF3D7_0402700;size=1214;Alias=812499,PFD0135c,MAL4P1.27,rosetting,PF3D7_0402700,PFD0135c,cytoadherencescheme	-
Pf3D7	4	545987	553810	4M2		ID=PF3D7_0412400;Name=PF3D7_0412400;description=erythrocyte+membrane+protein+1%2C+PfEMP1+%28VAR%29;size=7824;web_id=PF3D7_0412400;locus_tag=PF3D7_0412400;size=7824;Alias=VAR,812583,PfEMP1,Q9U0G6,6562758,PFD0615c,124505387,MAL4P2.56,rosetting,CAB62897.1,PF3D7_0412400,XP_001351435.1,PFD0615c,cytoadherencescheme	-
Pf3D7	4	559387	560638	4M2	pseudo	ID=PF3D7_0412600;Name=PF3D7_0412600;description=rifin%2C+pseudogene;size=1252;web_id=PF3D7_0412600;locus_tag=PF3D7_0412600;size=1252;Alias=PFD0620c,PF3D7_0412600	-
Pf3D7	4	561667	569342	4M2		ID=PF3D7_0412700;Name=PF3D7_0412700;description=erythrocyte+membrane+protein+1%2C+PfEMP1+%28VAR%29;size=7676;web_id=PF3D7_0412700;locus_tag=PF3D7_0412700;size=7676;Alias=VAR,812580,PfEMP1,Q9U0G5,6562760,PFD0625c,124505391,MAL4P2.58,rosetting,CAB62899.1,PF3D7_0412700,XP_001351437.1,PFD0625c,cytoadherencescheme	-
Pf3D7	4	576810	584668	4M2		ID=PF3D7_0412900;Name=PF3D7_0412900;description=erythrocyte+membrane+protein+1%2C+PfEMP1+%28VAR%29;size=7859;web_id=PF3D7_0412900;locus_tag=PF3D7_0412900;size=7859;Alias=VAR,812579,PfEMP1,Q8I1V7,23498196,PFD0630c,124505393,rosetting,CAD49166.1,PF3D7_0412900,XP_001351438.1,PFD0630c,cytoadherencescheme	-
Pf3D7	4	591949	599849	4M2		ID=PF3D7_0413100;Name=PF3D7_0413100;description=erythrocyte+membrane+protein+1%2C+PfEMP1+%28VAR%29;size=7901;web_id=PF3D7_0413100;locus_tag=PF3D7_0413100;size=7901;Alias=VAR,PfEMP1,Q8I1V6,4794155,23498197,PFD0635c,124505395,rosetting,CAD49167.1,PF3D7_0413100,XP_001351439.1,PFD0635c,cytoadherencescheme	-
Pf3D7	4	603166	604456	4M2		ID=PF3D7_0413200;Name=PF3D7_0413200;description=rifin+%28RIF%29;size=1291;web_id=PF3D7_0413200;locus_tag=PF3D7_0413200;size=1291;Alias=RIF,812578,Q8I1V5,23498198,PFD0640c,124505397,rosetting,CAD49168.1,MAL4P1.123,PF3D7_0413200,XP_001351440.1,apicoplastgene,PFD0640c,cytoadherencescheme	-
Pf3D7	4	609155	610433	4M2		ID=PF3D7_0413300;Name=PF3D7_0413300;description=rifin+%28RIF%29;size=1279;web_id=PF3D7_0413300;locus_tag=PF3D7_0413300;size=1279;Alias=RIF,812577,Q8I1V4,23498199,PFD0645w,124505399,rosetting,CAD49169.1,MAL4P1.124,PF3D7_0413300,XP_001351441.1,PFD0645w,cytoadherencescheme	-
Pf3D7	4	612798	614069	4M2	pseudo	ID=PF3D7_0413400;Name=PF3D7_0413400;description=erythrocyte+membrane+protein+1+%28PfEMP1%29%2C+exon1%2C+pseudogene+%28VAR+pseudogene%29;size=1272;web_id=PF3D7_0413400;locus_tag=PF3D7_0413400;size=1272;Alias=812573,PFD0655w,rosetting,MAL4P1.126,PF3D7_0413400,VAR pseudogene,PFD0655w,cytoadherencescheme	-
Pf3D7	4	935031	941875	4M3		ID=PF3D7_0420700;Name=PF3D7_0420700;description=erythrocyte+membrane+protein+1%2C+PfEMP1+%28VAR%29;size=6845;web_id=PF3D7_0420700;locus_tag=PF3D7_0420700;size=6845;Alias=VAR,812476,PfEMP1,Q8IFQ6,23498272,PFD0995c,124505543,rosetting,CAD49243.1,MAL4P1.194,PF3D7_0420700,XP_001351513.1,PFD0995c,cytoadherencescheme	-
Pf3D7	4	946169	953773	4M3		ID=PF3D7_0420900;Name=PF3D7_0420900;description=erythrocyte+membrane+protein+1%2C+PfEMP1+%28VAR%29;size=7605;web_id=PF3D7_0420900;locus_tag=PF3D7_0420900;size=7605;Alias=VAR,PfEMP1,Q8IFQ5,4794161,23498273,PFD1000c,124505545,rosetting,CAD49244.1,MAL4P1.195,PF3D7_0420900,XP_001351514.1,PFD1000c,cytoadherencescheme	-
Pf3D7	4	958067	965611	4M3		ID=PF3D7_0421100;Name=PF3D7_0421100;description=erythrocyte+membrane+protein+1%2C+PfEMP1+%28VAR%29;size=7545;web_id=PF3D7_0421100;locus_tag=PF3D7_0421100;size=7545;Alias=VAR,PfEMP1,Q8IFQ4,4794162,23498274,PFD1005c,124505547,rosetting,CAD49245.1,MAL4P1.196,PF3D7_0421100,XP_001351515.1,PFD1005c,cytoadherencescheme	-
Pf3D7	4	967087	968273	4M3		ID=PF3D7_0421200;Name=PF3D7_0421200;description=rifin+%28RIF%29;size=1187;web_id=PF3D7_0421200;locus_tag=PF3D7_0421200;size=1187;Alias=RIF,812474,Q8IFQ3,23498275,PFD1010w,124505549,rosetting,CAD49246.1,MAL4P1.197,PF3D7_0421200,XP_001351516.1,PFD1010w,cytoadherencescheme	-
Pf3D7	4	969031	976591	4M3		ID=PF3D7_0421300;Name=PF3D7_0421300;description=erythrocyte+membrane+protein+1%2C+PfEMP1+%28VAR%29;size=7561;web_id=PF3D7_0421300;locus_tag=PF3D7_0421300;size=7561;Alias=VAR,PfEMP1,Q8IFQ2,4794163,23498276,PFD1015c,124505551,rosetting,CAD49247.1,MAL4P1.198,PF3D7_0421300,XP_001351517.1,PFD1015c,cytoadherencescheme	-
Pf3D7	4	981823	982990	4M3	pseudo	ID=PF3D7_0421500;Name=PF3D7_0421500;description=rifin%2C+pseudogene+%28RIF%29;size=1168;web_id=PF3D7_0421500;locus_tag=PF3D7_0421500;size=1168;Alias=RIF,812473,Q8IFQ1,PFD1020c,rosetting,MAL4P1.199,PF3D7_0421500,PFD1020c,cytoadherencescheme	-
Pf3D7	4	986135	987447	4M3	pseudo	ID=PF3D7_0421600;Name=PF3D7_0421600;description=erythrocyte+membrane+protein+1+%28PfEMP1%29-like+pseudogene+%28VAR+pseudogene%29;size=1313;web_id=PF3D7_0421600;locus_tag=PF3D7_0421600;size=1313;Alias=812472,PFD1025w,rosetting,MAL4P1.200,PF3D7_0421600,VAR pseudogene,PFD1025w,cytoadherencescheme	-
Pf3D7	4	1146672	1147697	4E		ID=PF3D7_0425500;Name=PF3D7_0425500;description=stevor;size=1026;web_id=PF3D7_0425500;locus_tag=PF3D7_0425500;size=1026;Alias=rosetting,PF3D7_0425500,XP_001351559.1,23498318,PFD1220c,CAD49290.1,cytoadherencescheme,PFD1220c,812405,MAL4P1.239,124505635,apicoplastgene,Q8IFL0	-
Pf3D7	4	1149274	1150188	4E	pseudo	ID=PF3D7_0425600;Name=PF3D7_0425600;description=rifin%2C+pseudogene;size=915;web_id=PF3D7_0425600;locus_tag=PF3D7_0425600;size=915;Alias=PF3D7_0425600,PFD1225w,9221813,PFD1225w	-
Pf3D7	4	1152504	1153633	4E		ID=PF3D7_0425700;Name=PF3D7_0425700;description=rifin+%28RIF%29;size=1130;web_id=PF3D7_0425700;locus_tag=PF3D7_0425700;size=1130;Alias=812402,124505637,23498319,Q8IFK9,CAD49292.1,RIF,PFD1230c,PFD1230c,cytoadherencescheme,XP_001351560.1,rosetting,PF3D7_0425700,MAL4P1.241	-
Pf3D7	4	1156423	1167821	4E		ID=PF3D7_0425800;Name=PF3D7_0425800;description=erythrocyte+membrane+protein+1%2C+PfEMP1+%28VAR%29;size=11399;web_id=PF3D7_0425800;locus_tag=PF3D7_0425800;size=11399;Alias=rosetting,124505639,296005120,PFD1235w,XP_002808895.1,cytoadherencescheme,MAL4P1.242,225632294,CAD49293.1,MAL7P1.1,PF3D7_0425800,812400,23498320,PFD1235w,CAX64173.1,VAR,XP_001351561.1	-
Pf3D7	4	1169980	1171184	4E		ID=PF3D7_0425900;Name=PF3D7_0425900;description=rifin+%28RIF%29;size=1205;web_id=PF3D7_0425900;locus_tag=PF3D7_0425900;size=1205;Alias=PFD1240w,MAL4P1.243,812399,rosetting,PF3D7_0425900,RIF,CAD49294.1,Q8IFK8,23498321,124505641,XP_001351562.1,cytoadherencescheme,PFD1240w	-
Pf3D7	4	1173053	1180226	4E		ID=PF3D7_0426000;Name=PF3D7_0426000;description=erythrocyte+membrane+protein+1%2C+PfEMP1+%28VAR%29;size=7174;web_id=PF3D7_0426000;locus_tag=PF3D7_0426000;size=7174;Alias=MAL4P1.244,124505643,rosetting,PF3D7_0426000,Q8IFK7,PfEMP1,VAR,PFD1245c,CAD49295.1,23498322,XP_001351563.1,812398,PFD1245c,cytoadherencescheme	-
Pf3D7	5	20929	28456	5S		ID=PF3D7_0500100;Name=PF3D7_0500100;description=erythrocyte+membrane+protein+1%2C+PfEMP1+%28VAR%29;size=7528;web_id=PF3D7_0500100;locus_tag=PF3D7_0500100;size=7528;Alias=PF3D7_0500100,PFE0005w,MAL5P1.2,VAR,Q8I495,124505933,cytoadherencescheme,PFE0005w,rosetting,XP_001351564.1,23504491,CAD51367.1,812899,PfEMP1	-
Pf3D7	5	29776	30963	5S	pseudo	ID=PF3D7_0500300;Name=PF3D7_0500300;description=rifin%2C+pseudogene;size=1188;web_id=PF3D7_0500300;locus_tag=PF3D7_0500300;size=1188;Alias=PFE0015c,MAL5P1.4,PF3D7_0500300,cytoadherencescheme,812898,PFE0015c,rosetting	-
Pf3D7	5	33056	34378	5S		ID=PF3D7_0500400;Name=PF3D7_0500400;description=rifin+%28RIF%29;size=1323;web_id=PF3D7_0500400;locus_tag=PF3D7_0500400;size=1323;Alias=Q8I494,RIF,XP_001351565.1,23504492,124505935,PFE0020c,MAL5P1.5,CAD51370.1,rosetting,812896,PF3D7_0500400,PFE0020c,cytoadherencescheme	-
Pf3D7	5	36464	37564	5S		ID=PF3D7_0500500;Name=PF3D7_0500500;description=rifin+%28RIF%29;size=1101;web_id=PF3D7_0500500;locus_tag=PF3D7_0500500;size=1101;Alias=Q8I493,RIF,MAL5P1.6,PFE0025c,4794172,PFE0025c,rosetting,PF3D7_0500500,cytoadherencescheme	-
Pf3D7	5	39443	40488	5S	pseudo	ID=PF3D7_0500600;Name=PF3D7_0500600;description=stevor%2C+pseudogene;size=1046;web_id=PF3D7_0500600;locus_tag=PF3D7_0500600;size=1046;Alias=apicoplastgene,PFE0030c,812897,PF3D7_0500600,rosetting,PFE0030c,cytoadherencescheme,MAL5P1.7	-
Pf3D7	5	41129	41403	5S	pseudo	ID=PF3D7_0500700;Name=PF3D7_0500700;description=rifin%2C+pseudogene;size=275;web_id=PF3D7_0500700;locus_tag=PF3D7_0500700;size=275;Alias=PFE0035c,rosetting,PF3D7_0500700,812895,PFE0035c,MAL5P1.8,cytoadherencescheme	-
Pf3D7	5	1322400	1323087	5E	pseudo	ID=PF3D7_0532700;Name=PF3D7_0532700;description=erythrocyte+membrane+protein+1+%28PfEMP1%29%2C+pseudogene+%28VAR+pseudogene%29;size=688;web_id=PF3D7_0532700;locus_tag=PF3D7_0532700;size=688;Alias=cytoadherencescheme,PFE1620c,MAL5P1.318,apicoplastgene,PFE1620c,PF3D7_0532700,813133,rosetting,VAR pseudogene	-
Pf3D7	5	1324239	1325027	5E	pseudo	ID=PF3D7_0532800;Name=PF3D7_0532800;description=stevor%2C+pseudogene;size=789;web_id=PF3D7_0532800;locus_tag=PF3D7_0532800;size=789;Alias=PFE1627c,PF3D7_0532800	-
Pf3D7	5	1326245	1327429	5E		ID=PF3D7_0532900;Name=PF3D7_0532900;description=rifin+%28RIF%29;size=1185;web_id=PF3D7_0532900;locus_tag=PF3D7_0532900;size=1185;Alias=813135,MAL5P1.320,PFE1630w,rosetting,PF3D7_0532900,124506555,XP_001351875.1,23504901,RIF,cytoadherencescheme,apicoplastgene,CAD51684.1,Q8I3E7,PFE1630w	-
Pf3D7	5	1329555	1330808	5E	pseudo	ID=PF3D7_0533000;Name=PF3D7_0533000;description=rifin%2C+pseudogene;size=1254;web_id=PF3D7_0533000;locus_tag=PF3D7_0533000;size=1254;Alias=PFE1635w,MAL5P1.321,PF3D7_0533000,cytoadherencescheme,rosetting,813136,PFE1635w	-
Pf3D7	5	1333470	1342964	5E		ID=PF3D7_0533100;Name=PF3D7_0533100;description=erythrocyte+membrane+protein+1+%28PfEMP1%29%2C+truncated+%28VAR1CSA%29;size=9495;web_id=PF3D7_0533100;locus_tag=PF3D7_0533100;size=9495;Alias=PF3D7_0533100,CAD51686.1,VAR1CSA,rosetting,PFE1640w,124506557,XP_001351876.1,cytoadherencescheme,PfEMP1,23504902,813137,PFE1640w,MAL5P1.322,Q8I3E6	-
Pf3D7	6	653	1432	6S	pseudo	ID=PF3D7_0600100;Name=PF3D7_0600100;description=erythrocyte+membrane+protein+1+%28PfEMP1%29%2C+pseudogene+%28VAR+pseudogene%29;size=780;web_id=PF3D7_0600100;locus_tag=PF3D7_0600100;size=780;Alias=PFF0005c,cytoadherencescheme,VAR pseudogene,rosetting,3885989,MAL6P1.317,PF3D7_0600100,2270.t00001	-
Pf3D7	6	3503	12835	6S		ID=PF3D7_0600200;Name=PF3D7_0600200;description=erythrocyte+membrane+protein+1%2C+PfEMP1+%28VAR%29;size=9333;web_id=PF3D7_0600200;locus_tag=PF3D7_0600200;size=9333;Alias=PfEMP1,86170340,VAR,PF3D7_0600200,C6KSK8,PFF0010w,XP_965997.1,2270.t00002,MAL6P1.316,CAG25173.1,46362239,3885990,cytoadherencescheme,rosetting,PFF0010w	-
Pf3D7	6	15065	16410	6S		ID=PF3D7_0600300;Name=PF3D7_0600300;description=rifin+%28RIF%29;size=1346;web_id=PF3D7_0600300;locus_tag=PF3D7_0600300;size=1346;Alias=86170346,PF3D7_0600300,2270.t00003,46362240,CAG25174.1,cytoadherencescheme,RIF,C6KSK9,MAL6P1.315,rosetting,PFF0015c,PFF0015c,XP_965998.1,3885991	-
Pf3D7	6	18586	22721	6S		ID=PF3D7_0600400;Name=PF3D7_0600400;description=erythrocyte+membrane+protein+1+%28PfEMP1%29-like+protein+%28VAR-like%29;size=4136;web_id=PF3D7_0600400;locus_tag=PF3D7_0600400;size=4136;Alias=2270.t00005,XP_965999.1,MAL6P1.314,46362241,VAR-like,PFF0020c,cytoadherencescheme,PfEMP1,86170351,C6KSL0,PFF0020c,rosetting,CAG25175.1,3885677,PF3D7_0600400	-
Pf3D7	6	26557	27830	6S		ID=PF3D7_0600500;Name=PF3D7_0600500;description=rifin+%28RIF%29;size=1274;web_id=PF3D7_0600500;locus_tag=PF3D7_0600500;size=1274;Alias=2270.t00006,46362242,PFF0025w,cytoadherencescheme,MAL6P1.313,rosetting,86170357,PF3D7_0600500,RIF,3885678,C6KSL1,CAG25176.1,PFF0025w,XP_966000.1	-
Pf3D7	6	29618	31484	6S	pseudo	ID=PF3D7_0600600;Name=PF3D7_0600600;description=erythrocyte+membrane+protein+1+%28PfEMP1%29%2C+pseudogene+%28VAR+pseudogene%29;size=1867;web_id=PF3D7_0600600;locus_tag=PF3D7_0600600;size=1867;Alias=3885679,MAL6P1.312,cytoadherencescheme,PFF0030c,2270.t00007,rosetting,PFF0030c,VAR pseudogene,PF3D7_0600600	-
Pf3D7	6	31965	33244	6S		ID=PF3D7_0600700;Name=PF3D7_0600700;description=rifin+%28RIF%29;size=1280;web_id=PF3D7_0600700;locus_tag=PF3D7_0600700;size=1280;Alias=PFF0035c,RIF,PFF0035c,46362243,rosetting,XP_966001.1,C6KSL2,CAG25178.1,86170362,2270.t00008,PF3D7_0600700,MAL6P1.311,3885680,cytoadherencescheme	-
Pf3D7	6	35355	36595	6S	pseudo	ID=PF3D7_0600800;Name=PF3D7_0600800;description=rifin%2C+pseudogene;size=1241;web_id=PF3D7_0600800;locus_tag=PF3D7_0600800;size=1241;Alias=PFF0040c,PFF0040c,3885681,cytoadherencescheme,PF3D7_0600800,rosetting	-
Pf3D7	6	38721	39781	6S	pseudo	ID=PF3D7_0600900;Name=PF3D7_0600900;description=rifin%2C+pseudogene+%28RIF+pseudogene%29;size=1061;web_id=PF3D7_0600900;locus_tag=PF3D7_0600900;size=1061;Alias=RIF pseudogene,PFF0045c,rosetting,3885682,PFF0045c,PF3D7_0600900,cytoadherencescheme	-
Pf3D7	6	47463	48261	6S		ID=PF3D7_0601200;Name=PF3D7_0601200;description=Pfmc-2TM+Maurer%27s+cleft+two+transmembrane+protein+%28MC-2TM%29;size=799;web_id=PF3D7_0601200;locus_tag=PF3D7_0601200;size=799;Alias=CAG25183.1,PF3D7_0601200,MC-2TM,46362246,3885743,PFF0060w,86170378,PFF0060w,C6KSL5,XP_966004.1,MCprot	-
Pf3D7	6	51351	52898	6S	pseudo	ID=PF3D7_0601400;Name=PF3D7_0601400;description=erythrocyte+membrane+protein+1+%28PfEMP1%29%2C+pseudogene+%28VAR+pseudogene%29;size=1548;web_id=PF3D7_0601400;locus_tag=PF3D7_0601400;size=1548;Alias=VAR pseudogene,3885745,PFF0070w,rosetting,cytoadherencescheme,PFF0070w,PF3D7_0601400	-
Pf3D7	6	723117	731490	6M		ID=PF3D7_0617400;Name=PF3D7_0617400;description=erythrocyte+membrane+protein+1%2C+PfEMP1+%28VAR%29;size=8374;web_id=PF3D7_0617400;locus_tag=PF3D7_0617400;size=8374;Alias=C6KT15,XP_966160.1,CAG24990.1,PF3D7_0617400,rosetting,2270.t00065,46361126,3885794,PFF0845c,cytoadherencescheme,86171174,PFF0845c,VAR,MAL6P1.252	-
Pf3D7	6	735368	736325	6M	pseudo	ID=PF3D7_0617500;Name=PF3D7_0617500;description=rifin%2C+pseudogene;size=958;web_id=PF3D7_0617500;locus_tag=PF3D7_0617500;size=958;Alias=PFF0847w,PFF0847w,cytoadherencescheme,9221871,rosetting,PF3D7_0617500	-
Pf3D7	6	738259	739265	6M		ID=PF3D7_0617600;Name=PF3D7_0617600;description=stevor+%28Stevor%29;size=1007;web_id=PF3D7_0617600;locus_tag=PF3D7_0617600;size=1007;Alias=2270.t00066,Stevor,PFF0850c,apicoplastgene,3885795,rosetting,XP_966161.1,PF3D7_0617600,cytoadherencescheme,PFF0850c,MAL6P1.251,CAG24991.1,46361127,C6KT16,86171178	-
Pf3D7	6	741269	742406	6M		ID=PF3D7_0617700;Name=PF3D7_0617700;description=rifin+%28RIF%29;size=1138;web_id=PF3D7_0617700;locus_tag=PF3D7_0617700;size=1138;Alias=MAL6P1.250,XP_966162.1,PF3D7_0617700,cytoadherencescheme,2270.t00067,86171183,PFF0855c,rosetting,CAG24992.1,PFF0855c,3885796,RIF,C6KT17,46361128,apicoplastgene	-
Pf3D7	6	1313708	1315253	6E	pseudo	ID=PF3D7_0631200;Name=PF3D7_0631200;description=erythrocyte+membrane+protein+1+%28PfEMP1%29%2C+pseudogene+%28VAR+pseudogene%29;size=1546;web_id=PF3D7_0631200;locus_tag=PF3D7_0631200;size=1546;Alias=MAL6P1.18,PFF1515c,MAL6P1.17,PFF1515c,2270.t00307,2270.t00305,rosetting,PF3D7_0631200,cytoadherencescheme,VAR pseudogene,3885816	-
Pf3D7	6	1318327	1319116	6E		ID=PF3D7_0631400;Name=PF3D7_0631400;description=Pfmc-2TM+Maurer%27s+cleft+two+transmembrane+protein+%28MC-2TM%29;size=790;web_id=PF3D7_0631400;locus_tag=PF3D7_0631400;size=790;Alias=C6KTE8,3885818,MCprot,MAL6P1.15,225631780,XP_966295.2,PFF1525c,PFF1525c,296004748,2270.t00309,PF3D7_0631400,12368867,CAG25126.2,MC-2TM	-
Pf3D7	6	1326737	1327918	6E	pseudo	ID=PF3D7_0631700;Name=PF3D7_0631700;description=rifin%2C+pseudogene;size=1182;web_id=PF3D7_0631700;locus_tag=PF3D7_0631700;size=1182;Alias=MAL6P1.12,rosetting,PFF1540w,3885821,2270.t00312,PF3D7_0631700,PFF1540w,cytoadherencescheme	-
Pf3D7	6	1329771	1330963	6E		ID=PF3D7_0631800;Name=PF3D7_0631800;description=rifin+%28RIF%29;size=1193;web_id=PF3D7_0631800;locus_tag=PF3D7_0631800;size=1193;Alias=RIF,MAL6P1.11,PFF1545w,cytoadherencescheme,2270.t00313,apicoplastgene,PFF1545w,PF3D7_0631800,3885822,C6KTF0,rosetting	-
Pf3D7	6	1333013	1334035	6E		ID=PF3D7_0631900;Name=PF3D7_0631900;description=stevor+%28stevor%29;size=1023;web_id=PF3D7_0631900;locus_tag=PF3D7_0631900;size=1023;Alias=3885823,rosetting,296004750,cytoadherencescheme,PFF1550w,PF3D7_0631900,MAL6P1.10,225631781,2270.t00314,XP_966299.2,stevor,C6KTF1,PFF1550w,CAG25131.2	-
Pf3D7	6	1336146	1337473	6E		ID=PF3D7_0632000;Name=PF3D7_0632000;description=rifin+%28RIF%29;size=1328;web_id=PF3D7_0632000;locus_tag=PF3D7_0632000;size=1328;Alias=46361269,rosetting,CAG25132.1,MAL6P1.9,PFF1555w,cytoadherencescheme,C6KTF2,86171892,3885824,RIF,XP_966300.1,2270.t00315,PF3D7_0632000,PFF1555w	-
Pf3D7	6	1338218	1339417	6E		ID=PF3D7_0632100;Name=PF3D7_0632100;description=rifin+%28RIF%29;size=1200;web_id=PF3D7_0632100;locus_tag=PF3D7_0632100;size=1200;Alias=2270.t00316,PFF1560c,PF3D7_0632100,apicoplastgene,CAG25133.1,3885825,PFF1560c,C6KTF3,RIF,MAL6P1.8,46361270,XP_966301.1,cytoadherencescheme,86171898,rosetting	-
Pf3D7	6	1341307	1342595	6E		ID=PF3D7_0632200;Name=PF3D7_0632200;description=rifin+%28RIF%29;size=1289;web_id=PF3D7_0632200;locus_tag=PF3D7_0632200;size=1289;Alias=XP_966302.1,PFF1565c,MAL6P1.7,C6KTF4,PF3D7_0632200,3885826,CAG25134.1,RIF,46361271,2270.t00317,86171903,cytoadherencescheme,PFF1565c,rosetting	-
Pf3D7	6	1347341	1348571	6E		ID=PF3D7_0632300;Name=PF3D7_0632300;description=rifin+%28RIF%29;size=1231;web_id=PF3D7_0632300;locus_tag=PF3D7_0632300;size=1231;Alias=2270.t00318,rosetting,C6KTF5,MAL6P1.6,cytoadherencescheme,PFF1570w,PFF1570w,XP_966303.1,PF3D7_0632300,CAG25135.1,86171908,3885827,46361272,RIF	-
Pf3D7	6	1350724	1352087	6E		ID=PF3D7_0632400;Name=PF3D7_0632400;description=rifin+%28RIF%29;size=1364;web_id=PF3D7_0632400;locus_tag=PF3D7_0632400;size=1364;Alias=PF3D7_0632400,RIF,CAG25136.1,cytoadherencescheme,MAL6P1.5,46361273,rosetting,PFF1575w,XP_966304.1,C6KTF6,86171913,PFF1575w,3885828,2270.t00319	-
Pf3D7	6	1353946	1366430	6E		ID=PF3D7_0632500;Name=PF3D7_0632500;description=erythrocyte+membrane+protein+1%2C+PfEMP1+%28VAR%29;size=12485;web_id=PF3D7_0632500;locus_tag=PF3D7_0632500;size=12485;Alias=PF3D7_0632500,3885829,CAG25137.1,PfEMP1,46361274,VAR,C6KTF7,86171918,2270.t00320,MAL6P1.4,PFF1580c,XP_966305.1,rosetting,cytoadherencescheme,PFF1580c	-
Pf3D7	6	1367912	1369107	6E	pseudo	ID=PF3D7_0632600;Name=PF3D7_0632600;description=rifin%2C+pseudogene+%28RIF+pseudogene%29;size=1196;web_id=PF3D7_0632600;locus_tag=PF3D7_0632600;size=1196;Alias=MAL6P1.3,RIF pseudogene,PFF1585w,rosetting,apicoplastgene,PF3D7_0632600,PFF1585w,cytoadherencescheme,2270.t00321,3885830	-
Pf3D7	6	1371501	1372861	6E		ID=PF3D7_0632700;Name=PF3D7_0632700;description=rifin+%28RIF%29;size=1361;web_id=PF3D7_0632700;locus_tag=PF3D7_0632700;size=1361;Alias=86171923,PFF1590w,PF3D7_0632700,rosetting,C6KTF8,RIF,XP_966306.1,cytoadherencescheme,3885831,2270.t00322,MAL6P1.2,CAG25139.1,PFF1590w,46361275	-
Pf3D7	6	1374797	1382627	6E		ID=PF3D7_0632800;Name=PF3D7_0632800;description=erythrocyte+membrane+protein+1%2C+PfEMP1+%28VAR%29;size=7831;web_id=PF3D7_0632800;locus_tag=PF3D7_0632800;size=7831;Alias=PFF1595c,VAR,PFF1595c,PfEMP1,MAL6P1.1,PF3D7_0632800,cytoadherencescheme,2270.t00323,XP_966307.1,46361276,rosetting,C6KTF9,86171928,3885832,CAG25140.1	-
Pf3D7	7	20307	28083	7S		ID=PF3D7_0700100;Name=PF3D7_0700100;description=erythrocyte+membrane+protein+1%2C+PfEMP1+%28VAR%29;size=7777;web_id=PF3D7_0700100;locus_tag=PF3D7_0700100;size=7777;Alias=296005142,XP_002808906.1,VAR,rosetting,225632305,C0H510,CAX64187.1,PF3D7_0700100,cytoadherencescheme,PfEMP1,9221962,MAL8P1.220,MAL8P1.220	-
Pf3D7	7	30097	31269	7S		ID=PF3D7_0700200;Name=PF3D7_0700200;description=rifin+%28RIF%29;size=1173;web_id=PF3D7_0700200;locus_tag=PF3D7_0700200;size=1173;Alias=rosetting,cytoadherencescheme,PF3D7_0700200,MAL8P1.219,296005140,XP_002808905.1,MAL8P1.219,9221961,CAX64186.1,225632304,RIF,C0H509	-
Pf3D7	7	33585	34804	7S		ID=PF3D7_0700300;Name=PF3D7_0700300;description=rifin+%28RIF%29;size=1220;web_id=PF3D7_0700300;locus_tag=PF3D7_0700300;size=1220;Alias=225632303,RIF,PF3D7_0700300,MAL8P1.218,296005138,XP_002808904.1,CAX64185.1	-
Pf3D7	7	36922	37927	7S		ID=PF3D7_0700400;Name=PF3D7_0700400;description=stevor;size=1006;web_id=PF3D7_0700400;locus_tag=PF3D7_0700400;size=1006;Alias=PF3D7_0700400,MAL8P1.217,C0H507,rosetting,9221946,cytoadherencescheme,MAL8P1.217	-
Pf3D7	7	40288	41453	7S		ID=PF3D7_0700500;Name=PF3D7_0700500;description=rifin+%28RIF%29;size=1166;web_id=PF3D7_0700500;locus_tag=PF3D7_0700500;size=1166;Alias=MAL8P1.218,rosetting,MAL8P1.218,cytoadherencescheme,PF3D7_0700500,C0H508,RIF,9221947	-
Pf3D7	7	45559	46607	7S	pseudo	ID=PF3D7_0700700;Name=PF3D7_0700700;description=stevor%2C+pseudogene;size=1049;web_id=PF3D7_0700700;locus_tag=PF3D7_0700700;size=1049;Alias=9221958,rosetting,PF3D7_0700700,MAL8P1.214,MAL8P1.214,cytoadherencescheme	-
Pf3D7	7	48300	49106	7S		ID=PF3D7_0700800;Name=PF3D7_0700800;description=Pfmc-2TM+Maurer%27s+cleft+two+transmembrane+protein+%28MC-2TM%29;size=807;web_id=PF3D7_0700800;locus_tag=PF3D7_0700800;size=807;Alias=9221949,MC-2TM,CAX64180.1,C0H504,XP_002808900.1,MAL8P1.213,225632299,MCprot,MAL8P1.213,PF3D7_0700800,296005130	-
Pf3D7	7	55562	56781	7S		ID=PF3D7_0701100;Name=PF3D7_0701100;description=rifin+%28RIF%29;size=1220;web_id=PF3D7_0701100;locus_tag=PF3D7_0701100;size=1220;Alias=PF3D7_0701100,RIF	-
Pf3D7	7	59277	60366	7S	pseudo	ID=PF3D7_0701200;Name=PF3D7_0701200;description=rifin%2C+pseudogene+%28RIF%29;size=1090;web_id=PF3D7_0701200;locus_tag=PF3D7_0701200;size=1090;Alias=RIF,PF3D7_0701200	-
Pf3D7	7	62220	63401	7S	pseudo	ID=PF3D7_0701300;Name=PF3D7_0701300;description=rifin%2C+pseudogene;size=1182;web_id=PF3D7_0701300;locus_tag=PF3D7_0701300;size=1182;Alias=PF3D7_0701300,MAL7P1.200,rosetting,9221891,MAL7P1.200,cytoadherencescheme	-
Pf3D7	7	71049	71860	7S		ID=PF3D7_0701600;Name=PF3D7_0701600;description=Pfmc-2TM+Maurer%27s+cleft+two+transmembrane+protein+%28MC-2TM%29;size=812;web_id=PF3D7_0701600;locus_tag=PF3D7_0701600;size=812;Alias=XP_001348951.1,MAL7P1.5,2655003,MCprot,PF3D7_0701600,CAD50789.1,MC-2TM,MAL7P1.5,23498719,Q8IC51,124511636	-
Pf3D7	7	75918	77055	7S		ID=PF3D7_0701800;Name=PF3D7_0701800;description=rifin+%28RIF%29;size=1138;web_id=PF3D7_0701800;locus_tag=PF3D7_0701800;size=1138;Alias=PF07_0003,124511640,rosetting,Q8IC49,2654944,PF3D7_0701800,RIF,CAD50791.1,XP_001348953.1,23498721,PF07_0003,cytoadherencescheme	-
Pf3D7	7	511950	519425	7M		ID=PF3D7_0711700;Name=PF3D7_0711700;description=erythrocyte+membrane+protein+1%2C+PfEMP1+%28VAR%29;size=7476;web_id=PF3D7_0711700;locus_tag=PF3D7_0711700;size=7476;Alias=VAR,124511794,Q8IBX3,2654957,PfEMP1,rosetting,PF3D7_0711700,23498798,cytoadherencescheme,XP_001349030.1,PF07_0048,CAD50868.1,PF07_0048	-
Pf3D7	7	525063	526320	7M	pseudo	ID=PF3D7_0711900;Name=PF3D7_0711900;description=rifin%2C+pseudogene;size=1258;web_id=PF3D7_0711900;locus_tag=PF3D7_0711900;size=1258;Alias=2655001,cytoadherencescheme,MAL7P1.43,MAL7P1.43,rosetting,PF3D7_0711900	-
Pf3D7	7	527338	535131	7M		ID=PF3D7_0712000;Name=PF3D7_0712000;description=erythrocyte+membrane+protein+1%2C+PfEMP1+%28VAR%29;size=7794;web_id=PF3D7_0712000;locus_tag=PF3D7_0712000;size=7794;Alias=2654960,cytoadherencescheme,Q8IBX2,PF3D7_0712000,rosetting,PfEMP1,23498799,PF07_0049,PF07_0049,VAR,CAD50870.1,124511796,XP_001349031.1	-
Pf3D7	7	540343	541541	7M	pseudo	ID=PF3D7_0712200;Name=PF3D7_0712200;description=rifin%2C+pseudogene+%28RIF%29;size=1199;web_id=PF3D7_0712200;locus_tag=PF3D7_0712200;size=1199;Alias=RIF,2655002,MAL7P1.47,MAL7P1.47,cytoadherencescheme,PF3D7_0712200,rosetting	-
Pf3D7	7	542906	550520	7M		ID=PF3D7_0712300;Name=PF3D7_0712300;description=erythrocyte+membrane+protein+1%2C+PfEMP1+%28VAR%29;size=7615;web_id=PF3D7_0712300;locus_tag=PF3D7_0712300;size=7615;Alias=rosetting,MAL7P1.50,PfEMP1,CAD50872.1,PF3D7_0712300,MAL7P1.50,XP_001349032.1,VAR,Q8IBX1,124511798,23498800,cytoadherencescheme,2654929	-
Pf3D7	7	552158	559078	7M		ID=PF3D7_0712400;Name=PF3D7_0712400;description=erythrocyte+membrane+protein+1%2C+PfEMP1+%28VAR%29;size=6921;web_id=PF3D7_0712400;locus_tag=PF3D7_0712400;size=6921;Alias=4794183,rosetting,PF3D7_0712400,cytoadherencescheme,23498801,XP_001349033.1,PfEMP1,124511800,CAD50873.1,PF07_0050,PF07_0050,VAR,Q8IBX0	-
Pf3D7	7	562906	564160	7M	pseudo	ID=PF3D7_0712500;Name=PF3D7_0712500;description=rifin%2C+pseudogene;size=1255;web_id=PF3D7_0712500;locus_tag=PF3D7_0712500;size=1255;Alias=cytoadherencescheme,2655004,rosetting,MAL7P1.52,PF3D7_0712500,MAL7P1.52	-
Pf3D7	7	566726	574308	7M		ID=PF3D7_0712600;Name=PF3D7_0712600;description=erythrocyte+membrane+protein+1%2C+PfEMP1+%28VAR%29;size=7583;web_id=PF3D7_0712600;locus_tag=PF3D7_0712600;size=7583;Alias=Q8IBW9,XP_001349034.1,rosetting,124511802,PF07_0051,4794184,PfEMP1,VAR,PF3D7_0712600,cytoadherencescheme,PF07_0051,CAD50875.1,23498802	-
Pf3D7	7	581386	588923	7M		ID=PF3D7_0712800;Name=PF3D7_0712800;description=erythrocyte+membrane+protein+1%2C+PfEMP1+%28VAR%29;size=7538;web_id=PF3D7_0712800;locus_tag=PF3D7_0712800;size=7538;Alias=VAR,CAD50876.1,rosetting,cytoadherencescheme,Q8IBW8,2654948,MAL7P1.55,124511804,MAL7P1.55,XP_001349035.1,PF3D7_0712800,PfEMP1,23498803	-
Pf3D7	7	590326	597733	7M		ID=PF3D7_0712900;Name=PF3D7_0712900;description=erythrocyte+membrane+protein+1%2C+PfEMP1+%28VAR%29;size=7408;web_id=PF3D7_0712900;locus_tag=PF3D7_0712900;size=7408;Alias=rosetting,MAL7P1.56,PF3D7_0712900,XP_001349036.1,124511806,23498804,PfEMP1,Q8IBW7,MAL7P1.56,4794185,cytoadherencescheme,CAD50877.1,VAR	-
Pf3D7	7	602141	603381	7M		ID=PF3D7_0713000;Name=PF3D7_0713000;description=rifin+%28RIF%29;size=1241;web_id=PF3D7_0713000;locus_tag=PF3D7_0713000;size=1241;Alias=rosetting,XP_001349037.1,MAL7P1.57,MAL7P1.57,Q8IBW6,CAD50878.1,23498805,124511808,PF3D7_0713000,2654942,RIF,cytoadherencescheme	-
Pf3D7	7	605653	606440	7M		ID=PF3D7_0713100;Name=PF3D7_0713100;description=Pfmc-2TM+Maurer%27s+cleft+two+transmembrane+protein+%28MC-2TM%29;size=788;web_id=PF3D7_0713100;locus_tag=PF3D7_0713100;size=788;Alias=CAD50879.1,2655005,PF3D7_0713100,MAL7P1.58,MCprot,MAL7P1.58,23498806,124511810,Q8IBW5,MC-2TM,XP_001349038.1	-
Pf3D7	7	609297	610522	7M	pseudo	ID=PF3D7_0713300;Name=PF3D7_0713300;description=erythrocyte+membrane+protein+1+%28PfEMP1%29%2C+pseudogene+%28VAR+pseudogene%29;size=1226;web_id=PF3D7_0713300;locus_tag=PF3D7_0713300;size=1226;Alias=MAL7P1.60,2655009,MAL7P1.61,VAR pseudogene,MAL7P1.63,MAL7P1.61,cytoadherencescheme,rosetting,MAL7P1.62,PF3D7_0713300	-
Pf3D7	7	1382410	1383524	7E	pseudo	ID=PF3D7_0731900;Name=PF3D7_0731900;description=rifin%2C+pseudogene;size=1115;web_id=PF3D7_0731900;locus_tag=PF3D7_0731900;size=1115;Alias=9221876,MAL7P1.179,PF3D7_0731900,MAL7P1.179	-
Pf3D7	7	1385635	1386626	7E		ID=PF3D7_0732000;Name=PF3D7_0732000;description=stevor+%28stevor%29;size=992;web_id=PF3D7_0732000;locus_tag=PF3D7_0732000;size=992;Alias=2655182,PF07_0130,stevor,124512156,cytoadherencescheme,XP_001349211.1,Q8IBE5,CAD51059.1,apicoplastgene,23498979,rosetting,PF3D7_0732000,PF07_0130	-
Pf3D7	7	1387753	1389037	7E	pseudo	ID=PF3D7_0732100;Name=PF3D7_0732100;description=erythrocyte+membrane+protein+1+%28PfEMP1%29%2C+pseudogene+%28VAR+pseudogene%29;size=1285;web_id=PF3D7_0732100;locus_tag=PF3D7_0732100;size=1285;Alias=cytoadherencescheme,PF3D7_0732100,PF07_0131,MAL7P1.183,rosetting,MAL7P1.183,VAR pseudogene,2654941	-
Pf3D7	7	1390711	1392043	7E		ID=PF3D7_0732200;Name=PF3D7_0732200;description=rifin+%28RIF%29;size=1333;web_id=PF3D7_0732200;locus_tag=PF3D7_0732200;size=1333;Alias=PF3D7_0732200,XP_001349212.1,1791.m00049,Q8IBE4,RIF,cytoadherencescheme,PF07_0132,4794188,124512158,rosetting,PF07_0132,23498980,CAD51061.1	-
Pf3D7	7	1396437	1397639	7E		ID=PF3D7_0732300;Name=PF3D7_0732300;description=rifin+%28RIF%29;size=1203;web_id=PF3D7_0732300;locus_tag=PF3D7_0732300;size=1203;Alias=Q8IBE3,23498981,XP_001349213.1,2654945,PF3D7_0732300,rosetting,MAL7P1.184,124512160,RIF,PF07_0133,CAD51062.1,cytoadherencescheme,MAL7P1.184	-
Pf3D7	7	1399452	1400682	7E		ID=PF3D7_0732400;Name=PF3D7_0732400;description=rifin+%28RIF%29;size=1231;web_id=PF3D7_0732400;locus_tag=PF3D7_0732400;size=1231;Alias=cytoadherencescheme,PF07_0134,CAD51063.1,PF3D7_0732400,PF07_0134,RIF,rosetting,XP_001349214.1,4794189,124512162,1791.m00047,23498982,Q8IBE2	-
Pf3D7	7	1402623	1403978	7E		ID=PF3D7_0732500;Name=PF3D7_0732500;description=rifin+%28RIF%29;size=1356;web_id=PF3D7_0732500;locus_tag=PF3D7_0732500;size=1356;Alias=MAL7P1.185,225632193,296004915,XP_002808802.1,PF3D7_0732500,4794190,cytoadherencescheme,C0H4Q5,RIF,CAX64078.1,PF07_0135,MAL7P1.185,rosetting	-
Pf3D7	7	1408781	1409975	7E		ID=PF3D7_0732700;Name=PF3D7_0732700;description=rifin+%28RIF%29;size=1195;web_id=PF3D7_0732700;locus_tag=PF3D7_0732700;size=1195;Alias=296004917,cytoadherencescheme,225632194,RIF,PF3D7_0732700,XP_002808803.1,PF07_0136,CAX64080.1,PF07_0136,rosetting,MAL7P1.210,4794191,C0H4Q7	-
Pf3D7	7	1410435	1412231	7E		ID=PF3D7_0732800;Name=PF3D7_0732800;description=var-like+erythrocyte+membrane+protein+1;size=1797;web_id=PF3D7_0732800;locus_tag=PF3D7_0732800;size=1797;Alias=C0H4Q8,PF07_0137,cytoadherencescheme,MAL7P1.186,MAL7P1.186,MAL7P1.211,CAX64081.1,2654943,XP_002808804.1,PF3D7_0732800,rosetting,296004919,225632195	-
Pf3D7	7	1414434	1415683	7E		ID=PF3D7_0732900;Name=PF3D7_0732900;description=rifin+%28RIF%29;size=1250;web_id=PF3D7_0732900;locus_tag=PF3D7_0732900;size=1250;Alias=23498986,PF07_0138,124512170,XP_001349218.1,4794192,RIF,rosetting,PF3D7_0732900,1842.m00016,CAD51067.1,PF07_0138,cytoadherencescheme,Q8IBD9	-
Pf3D7	7	1417588	1426234	7E		ID=PF3D7_0733000;Name=PF3D7_0733000;description=erythrocyte+membrane+protein+1%2C+PfEMP1+%28VAR%29;size=8647;web_id=PF3D7_0733000;locus_tag=PF3D7_0733000;size=8647;Alias=rosetting,Q8IBD8,PF07_0139,CAD51068.1,2654949,23498987,MAL7P1.187,PfEMP1,MAL7P1.187,PF3D7_0733000,cytoadherencescheme,XP_001349219.1,VAR,124512172	-
Pf3D7	8	21361	28653	8S		ID=PF3D7_0800100;Name=PF3D7_0800100;description=erythrocyte+membrane+protein+1%2C+PfEMP1+%28VAR%29;size=7293;web_id=PF3D7_0800100;locus_tag=PF3D7_0800100;size=7293;Alias=cytoadherencescheme,4794199,124512762,PF08_0142,rosetting,Q8IAK1,CAD51363.1,XP_001349514.1,23499283,VAR,MAL8P1.168,PfEMP1,PF3D7_0800100	-
Pf3D7	8	29700	39033	8S		ID=PF3D7_0800200;Name=PF3D7_0800200;description=erythrocyte+membrane+protein+1%2C+PfEMP1+%28VAR%29;size=9334;web_id=PF3D7_0800200;locus_tag=PF3D7_0800200;size=9334;Alias=PF08_0141,CAD51362.1,PF3D7_0800200,124512760,PfEMP1,XP_001349513.1,2655302,cytoadherencescheme,VAR,23499282,Q8IAK2,rosetting,PF08_0141,MAL8P1.167	-
Pf3D7	8	40948	50939	8S		ID=PF3D7_0800300;Name=PF3D7_0800300;description=erythrocyte+membrane+protein+1%2C+PfEMP1+%28VAR%29;size=9992;web_id=PF3D7_0800300;locus_tag=PF3D7_0800300;size=9992;Alias=2655305,PF08_0140,cytoadherencescheme,rosetting,PfEMP1,23499281,PF3D7_0800300,VAR,XP_001349512.1,124512758,CAD51361.1,Q8IAK3,PF08_0140,MAL8P1.166	-
Pf3D7	8	52760	53982	8S		ID=PF3D7_0800400;Name=PF3D7_0800400;description=rifin+%28RIF%29;size=1223;web_id=PF3D7_0800400;locus_tag=PF3D7_0800400;size=1223;Alias=PF3D7_0800400,RIF	-
Pf3D7	8	56352	57703	8S		ID=PF3D7_0800500;Name=PF3D7_0800500;description=rifin+%28RIF%29;size=1352;web_id=PF3D7_0800500;locus_tag=PF3D7_0800500;size=1352;Alias=PF3D7_0800500,cytoadherencescheme,124512754,RIF,XP_001349510.1,rosetting,PF08_0138,apicoplastgene,Q8IAK4,PF08_0138,CAD51359.1,2655306,23499279	-
Pf3D7	8	431165	439051	8M		ID=PF3D7_0808600;Name=PF3D7_0808600;description=erythrocyte+membrane+protein+1%2C+PfEMP1+%28VAR%29;size=7887;web_id=PF3D7_0808600;locus_tag=PF3D7_0808600;size=7887;Alias=PfEMP1,cytoadherencescheme,VAR,PF08_0107,23499207,XP_001349438.1,rosetting,CAD51287.1,Q8IAS3,PF08_0107,PF3D7_0808600,124512610,MAL8P1.119,4794195	-
Pf3D7	8	440408	448062	8M		ID=PF3D7_0808700;Name=PF3D7_0808700;description=erythrocyte+membrane+protein+1%2C+PfEMP1+%28VAR%29;size=7655;web_id=PF3D7_0808700;locus_tag=PF3D7_0808700;size=7655;Alias=CAD51286.1,PfEMP1,MAL8P1.118,PF08_0106,PF3D7_0808700,124512608,2655304,XP_001349437.1,cytoadherencescheme,VAR,23499206,PF08_0106,Q8IAS4,rosetting	-
Pf3D7	8	450615	451899	8M		ID=PF3D7_0808800;Name=PF3D7_0808800;description=rifin+%28RIF%29;size=1285;web_id=PF3D7_0808800;locus_tag=PF3D7_0808800;size=1285;Alias=cytoadherencescheme,RIF,23499205,PF3D7_0808800,PF08_0105,PF08_0105,CAD51285.1,XP_001349436.1,Q8IAS5,124512606,4794194,rosetting	-
Pf3D7	8	453803	454919	8M		ID=PF3D7_0808900;Name=PF3D7_0808900;description=rifin+%28RIF%29;size=1117;web_id=PF3D7_0808900;locus_tag=PF3D7_0808900;size=1117;Alias=PF08_0104,PF3D7_0808900,rosetting,23499204,MAL8P1.117,CAD51284.1,Q8IAS6,PF08_0104,cytoadherencescheme,XP_001349435.1,2655307,124512604,RIF	-
Pf3D7	8	459312	466567	8M		ID=PF3D7_0809100;Name=PF3D7_0809100;description=erythrocyte+membrane+protein+1%2C+PfEMP1+%28VAR%29;size=7256;web_id=PF3D7_0809100;locus_tag=PF3D7_0809100;size=7256;Alias=CAD51283.1,XP_001349434.1,PF3D7_0809100,PF08_0103,23499203,rosetting,VAR,Q8IAS7,2655303,cytoadherencescheme,124512602,PfEMP1,PF08_0103	-
Pf3D7	8	1383349	1384377	8E		ID=PF3D7_0832000;Name=PF3D7_0832000;description=stevor;size=1029;web_id=PF3D7_0832000;locus_tag=PF3D7_0832000;size=1029;Alias=9221927,XP_002808742.1,PF3D7_0832000,cytoadherencescheme,MAL7P1.227,296004780,MAL7P1.227,225632126,C0H4J5,rosetting,CAX64015.1	-
Pf3D7	8	1386625	1387578	8E	pseudo	ID=PF3D7_0832100;Name=PF3D7_0832100;description=rifin%2C+pseudogene;size=954;web_id=PF3D7_0832100;locus_tag=PF3D7_0832100;size=954;Alias=cytoadherencescheme,9221890,rosetting,MAL7P1.226,PF3D7_0832100,MAL7P1.226	-
Pf3D7	8	1399560	1400583	8E		ID=PF3D7_0832400;Name=PF3D7_0832400;description=stevor;size=1024;web_id=PF3D7_0832400;locus_tag=PF3D7_0832400;size=1024;Alias=MAL7P1.223,9221926,MAL7P1.223,cytoadherencescheme,PF3D7_0832400,rosetting,C0H4J1	-
Pf3D7	8	1402567	1403711	8E		ID=PF3D7_0832500;Name=PF3D7_0832500;description=rifin+%28RIF%29;size=1145;web_id=PF3D7_0832500;locus_tag=PF3D7_0832500;size=1145;Alias=296004770,rosetting,RIF,225632121,C0H4J0,9221893,XP_002808737.1,MAL7P1.222,cytoadherencescheme,PF3D7_0832500,MAL7P1.222,CAX64010.1	-
Pf3D7	8	1405835	1406999	8E		ID=PF3D7_0832600;Name=PF3D7_0832600;description=stevor;size=1165;web_id=PF3D7_0832600;locus_tag=PF3D7_0832600;size=1165;Alias=C0H4I9,CAX64009.1,XP_002808736.1,296004768,cytoadherencescheme,PF3D7_0832600,rosetting,9221886,225632120,MAL7P1.310,MAL7P1.310	-
Pf3D7	8	1411058	1412141	8E		ID=PF3D7_0832800;Name=PF3D7_0832800;description=rifin+%28RIF%29;size=1084;web_id=PF3D7_0832800;locus_tag=PF3D7_0832800;size=1084;Alias=CAX64007.1,296004764,rosetting,MAL7P1.219,PF3D7_0832800,MAL7P1.219,9221928,225632118,XP_002808734.1,cytoadherencescheme,RIF,C0H4I7	-
Pf3D7	8	1414283	1415293	8E		ID=PF3D7_0832900;Name=PF3D7_0832900;description=stevor+%28stevor%29;size=1011;web_id=PF3D7_0832900;locus_tag=PF3D7_0832900;size=1011;Alias=225632117,MAL7P1.218,9221924,rosetting,cytoadherencescheme,296004762,CAX64006.1,PF3D7_0832900,MAL7P1.218,stevor,XP_002808733.1,C0H4I6	-
Pf3D7	8	1417438	1418625	8E		ID=PF3D7_0833000;Name=PF3D7_0833000;description=rifin+%28RIF%29;size=1188;web_id=PF3D7_0833000;locus_tag=PF3D7_0833000;size=1188;Alias=MAL7P1.217,C0H4I5,9221923,CAX64005.1,XP_002808732.1,rosetting,PF3D7_0833000,225632116,MAL7P1.217,RIF,cytoadherencescheme,296004760	-
Pf3D7	8	1420818	1422077	8E		ID=PF3D7_0833100;Name=PF3D7_0833100;description=rifin+%28RIF%29;size=1260;web_id=PF3D7_0833100;locus_tag=PF3D7_0833100;size=1260;Alias=296004758,RIF,CAX64004.1,PF3D7_0833100,225632115,9221922,C0H4I4,MAL7P1.216,cytoadherencescheme,XP_002808731.1,rosetting,MAL7P1.216	-
Pf3D7	8	1426884	1428135	8E		ID=PF3D7_0833200;Name=PF3D7_0833200;description=rifin+%28RIF%29;size=1252;web_id=PF3D7_0833200;locus_tag=PF3D7_0833200;size=1252;Alias=225632114,PF3D7_0833200,RIF,rosetting,296004756,MAL7P1.215,9221931,XP_002808730.1,MAL7P1.215,C0H4I3,CAX64003.1,cytoadherencescheme	-
Pf3D7	8	1429330	1430514	8E	pseudo	ID=PF3D7_0833300;Name=PF3D7_0833300;description=VAR+pseudogene+fragment%2C+erythrocyte+membrane+protein+1+%28PfEMP1%29+pseudogene+fragment;size=1185;web_id=PF3D7_0833300;locus_tag=PF3D7_0833300;size=1185;Alias=9221921,cytoadherencescheme,PF3D7_0833300,rosetting,MAL7P1.214,MAL7P1.214	-
Pf3D7	8	1432696	1433932	8E		ID=PF3D7_0833400;Name=PF3D7_0833400;description=rifin+%28RIF%29;size=1237;web_id=PF3D7_0833400;locus_tag=PF3D7_0833400;size=1237;Alias=MAL7P1.213,RIF,cytoadherencescheme,9221930,rosetting,296004754,225632113,PF3D7_0833400,MAL7P1.213,C0H4I2,XP_002808729.1,CAX64002.1	-
Pf3D7	8	1435794	1443449	8E		ID=PF3D7_0833500;Name=PF3D7_0833500;description=erythrocyte+membrane+protein+1%2C+PfEMP1+%28VAR%29;size=7656;web_id=PF3D7_0833500;locus_tag=PF3D7_0833500;size=7656;Alias=XP_002808728.1,PfEMP1,9221932,cytoadherencescheme,PF3D7_0833500,CAX64001.1,rosetting,225632112,296004752,MAL7P1.212,VAR,C0H4I1	-
Pf3D7	9	20080	27885	9S		ID=PF3D7_0900100;Name=PF3D7_0900100;description=erythrocyte+membrane+protein+1%2C+PfEMP1+%28VAR%29;size=7806;web_id=PF3D7_0900100;locus_tag=PF3D7_0900100;size=7806;Alias=23504904,VAR,XP_001351877.1,CAD51687.1,124506559,Q8I3E5,cytoadherencescheme,PfEMP1,PFI0005w,rosetting,813289,PF3D7_0900100,PFI0005w	-
Pf3D7	9	29797	31157	9S		ID=PF3D7_0900200;Name=PF3D7_0900200;description=rifin+%28RIF%29;size=1361;web_id=PF3D7_0900200;locus_tag=PF3D7_0900200;size=1361;Alias=Q8I3E4,rosetting,PFI0010c,813290,124506561,23504905,RIF,PF3D7_0900200,PFI0010c,CAD51688.1,cytoadherencescheme,XP_001351878.1	-
Pf3D7	9	33553	34795	9S		ID=PF3D7_0900300;Name=PF3D7_0900300;description=rifin+%28RIF%29;size=1243;web_id=PF3D7_0900300;locus_tag=PF3D7_0900300;size=1243;Alias=CAD51689.1,124506563,Q8I3E3,PFI0015c,4794200,rosetting,23504906,RIF,XP_001351879.1,cytoadherencescheme,PF3D7_0900300,PFI0015c	-
Pf3D7	9	39554	40740	9S		ID=PF3D7_0900400;Name=PF3D7_0900400;description=rifin+%28RIF%29;size=1187;web_id=PF3D7_0900400;locus_tag=PF3D7_0900400;size=1187;Alias=cytoadherencescheme,rosetting,PFI0020w,CAD51690.1,813291,Q8I3E2,XP_001351880.1,PFI0020w,23504907,RIF,PF3D7_0900400,124506565	-
Pf3D7	9	42909	44045	9S		ID=PF3D7_0900500;Name=PF3D7_0900500;description=rifin+%28RIF%29;size=1137;web_id=PF3D7_0900500;locus_tag=PF3D7_0900500;size=1137;Alias=XP_001351881.1,4794201,rosetting,PFI0025c,PF3D7_0900500,cytoadherencescheme,RIF,CAD51691.1,Q8I3E1,124506567,PFI0025c,23504908	-
Pf3D7	9	45902	47236	9S		ID=PF3D7_0900600;Name=PF3D7_0900600;description=rifin+%28RIF%29;size=1335;web_id=PF3D7_0900600;locus_tag=PF3D7_0900600;size=1335;Alias=rosetting,23504909,PF3D7_0900600,cytoadherencescheme,XP_001351882.1,124506569,CAD51692.1,Q8I3E0,RIF,4794202,PFI0030c,PFI0030c	-
Pf3D7	9	49612	50971	9S		ID=PF3D7_0900700;Name=PF3D7_0900700;description=rifin+%28RIF%29;size=1360;web_id=PF3D7_0900700;locus_tag=PF3D7_0900700;size=1360;Alias=4794203,rosetting,124506571,Q8I3D9,PFI0035c,cytoadherencescheme,RIF,23504910,PFI0035c,XP_001351883.1,PF3D7_0900700,CAD51693.1	-
Pf3D7	9	52648	54020	9S	pseudo	ID=PF3D7_0900800;Name=PF3D7_0900800;description=erythrocyte+membrane+protein+1+%28PfEMP1%29%2C+exon2%2C+pseudogene+%28VAR+pseudogene%29;size=1373;web_id=PF3D7_0900800;locus_tag=PF3D7_0900800;size=1373;Alias=PFI0040c,813292,PF3D7_0900800,rosetting,cytoadherencescheme,PFI0040c,VAR pseudogene	-
Pf3D7	9	55074	56081	9S		ID=PF3D7_0900900;Name=PF3D7_0900900;description=stevor+%28STEVOR%29;size=1008;web_id=PF3D7_0900900;locus_tag=PF3D7_0900900;size=1008;Alias=Q8I3D8,813293,cytoadherencescheme,rosetting,PFI0045c,STEVOR,PF3D7_0900900,PFI0045c	-
Pf3D7	9	58162	59240	9S		ID=PF3D7_0901000;Name=PF3D7_0901000;description=rifin+%28RIF%29;size=1079;web_id=PF3D7_0901000;locus_tag=PF3D7_0901000;size=1079;Alias=PFI0050c,rosetting,CAD51696.1,Q8I3D7,XP_001351885.1,PF3D7_0901000,813294,cytoadherencescheme,23504912,RIF,124506575,PFI0050c	-
Pf3D7	9	61342	62553	9S		ID=PF3D7_0901100;Name=PF3D7_0901100;description=rifin+%28RIF%29;size=1212;web_id=PF3D7_0901100;locus_tag=PF3D7_0901100;size=1212;Alias=PF3D7_0901100,PFI0055c,23504913,PFI0055c,124506577,Q8I3D6,4794204,XP_001351886.1,CAD51697.1,cytoadherencescheme,RIF,rosetting	-
Pf3D7	9	67334	68625	9S		ID=PF3D7_0901300;Name=PF3D7_0901300;description=rifin+%28RIF%29;size=1292;web_id=PF3D7_0901300;locus_tag=PF3D7_0901300;size=1292;Alias=23504915,rosetting,PFI0065w,124506581,4794205,PF3D7_0901300,cytoadherencescheme,RIF,XP_001351888.1,PFI0065w,Q8I3D4,CAD51699.1	-
Pf3D7	9	70521	71738	9S		ID=PF3D7_0901400;Name=PF3D7_0901400;description=rifin+%28RIF%29;size=1218;web_id=PF3D7_0901400;locus_tag=PF3D7_0901400;size=1218;Alias=23504916,CAD51700.1,124506583,cytoadherencescheme,PF3D7_0901400,rosetting,PFI0070w,RIF,4794206,PFI0070w,Q8I3D3,XP_001351889.1	-
Pf3D7	9	74409	75746	9S		ID=PF3D7_0901500;Name=PF3D7_0901500;description=rifin+%28RIF%29;size=1338;web_id=PF3D7_0901500;locus_tag=PF3D7_0901500;size=1338;Alias=XP_001351890.1,CAD51701.1,RIF,PFI0075w,Q8I3D2,cytoadherencescheme,PF3D7_0901500,rosetting,124506585,4794207,23504917,PFI0075w	-
Pf3D7	9	77861	78874	9S		ID=PF3D7_0901600;Name=PF3D7_0901600;description=stevor+%28STEVOR%29;size=1014;web_id=PF3D7_0901600;locus_tag=PF3D7_0901600;size=1014;Alias=PFI0080w,cytoadherencescheme,813296,PF3D7_0901600,CAD51702.1,rosetting,XP_001351891.1,PFI0080w,23504918,124506587,STEVOR,Q8I3D1	-
Pf3D7	9	1474431	1475704	9E		ID=PF3D7_0937300;Name=PF3D7_0937300;description=rifin+%28RIF%29;size=1274;web_id=PF3D7_0937300;locus_tag=PF3D7_0937300;size=1274;Alias=XP_001352237.1,PFI1805w,RIF,813641,Q8I2E7,124507281,PFI1805w,PF3D7_0937300,cytoadherencescheme,rosetting,CAD52047.1,23505267	-
Pf3D7	9	1477526	1478736	9E		ID=PF3D7_0937400;Name=PF3D7_0937400;description=rifin+%28RIF%29;size=1211;web_id=PF3D7_0937400;locus_tag=PF3D7_0937400;size=1211;Alias=cytoadherencescheme,124507283,PFI1810w,PF3D7_0937400,rosetting,XP_001352238.1,23505268,Q8I2E6,4794209,RIF,CAD52048.1,PFI1810w	-
Pf3D7	9	1480947	1482211	9E		ID=PF3D7_0937500;Name=PF3D7_0937500;description=rifin+%28RIF%29;size=1265;web_id=PF3D7_0937500;locus_tag=PF3D7_0937500;size=1265;Alias=Q8I2E5,813642,PFI1815c,cytoadherencescheme,PF3D7_0937500,124507285,rosetting,CAD52049.1,PFI1815c,XP_001352239.1,23505269,RIF	-
Pf3D7	9	1492373	1493708	9E		ID=PF3D7_0937700;Name=PF3D7_0937700;description=rifin+%28RIF%29;size=1336;web_id=PF3D7_0937700;locus_tag=PF3D7_0937700;size=1336;Alias=124507289,CAD52051.1,RIF,rosetting,cytoadherencescheme,23505271,PF3D7_0937700,PFI1825w,XP_001352241.1,XP_001349511.1,23499280,813644,PFI1825w,124512756,CAD51360.1	-
Pf3D7	9	1495579	1503336	9E		ID=PF3D7_0937800;Name=PF3D7_0937800;description=erythrocyte+membrane+protein+1%2C+PfEMP1+%28VAR%29;size=7758;web_id=PF3D7_0937800;locus_tag=PF3D7_0937800;size=7758;Alias=PFI1830c,23505272,PFI1830c,CAD52052.1,PF3D7_0937800,cytoadherencescheme,PfEMP1,Q8I2E3,124507291,rosetting,813645,VAR,XP_001352242.1	-
Pf3D7	10	28490	36164	10S		ID=PF3D7_1000100;Name=PF3D7_1000100;description=erythrocyte+membrane+protein+1%2C+PfEMP1+%28VAR%29;size=7675;web_id=PF3D7_1000100;locus_tag=PF3D7_1000100;size=7675;Alias=XP_001347288.1,20403153,21573138,VAR,AAN35201.1,9786187,124801837,cytoadherencescheme,15973412,810160,PF10_0001,21402930,21696460,19119419,11420100,12368864,Q8IK37,PfEMP1,17311092,11316367,9230440,15692070,18844973,19730749,roset…	-
Pf3D7	10	38050	39395	10S		ID=PF3D7_1000200;Name=PF3D7_1000200;description=rifin+%28RIF%29;size=1346;web_id=PF3D7_1000200;locus_tag=PF3D7_1000200;size=1346;Alias=PF3D7_1000200,cytoadherencescheme,10430943,AAN35202.2,12368864,PF10_0002,PF10_0002,Q8IK36,254922367,258596955,XP_001347289.2,810161,RIF,rosetting	-
Pf3D7	10	41773	42963	10S		ID=PF3D7_1000300;Name=PF3D7_1000300;description=rifin+%28RIF%29;size=1191;web_id=PF3D7_1000300;locus_tag=PF3D7_1000300;size=1191;Alias=10430943,Q8IK35,XP_001347290.1,cytoadherencescheme,124801862,rosetting,AAN35203.1,PF3D7_1000300,PF10_0003,PF10_0003,12368864,RIF,23494868,810162,apicoplastgene	-
Pf3D7	10	44816	46133	10S		ID=PF3D7_1000400;Name=PF3D7_1000400;description=rifin+%28RIF%29;size=1318;web_id=PF3D7_1000400;locus_tag=PF3D7_1000400;size=1318;Alias=XP_001347291.1,AAN35204.1,PF3D7_1000400,Q8IK34,10430943,124801864,PF10_0004,PF10_0004,12368864,cytoadherencescheme,810163,RIF,23494869,rosetting	-
Pf3D7	10	48052	49384	10S		ID=PF3D7_1000500;Name=PF3D7_1000500;description=rifin+%28RIF%29;size=1333;web_id=PF3D7_1000500;locus_tag=PF3D7_1000500;size=1333;Alias=810164,rosetting,cytoadherencescheme,PF3D7_1000500,10430943,PF10_0005,RIF,12368864,PF10_0005,Q8IK33	-
Pf3D7	10	51349	52599	10S		ID=PF3D7_1000600;Name=PF3D7_1000600;description=rifin+%28RIF%29;size=1251;web_id=PF3D7_1000600;locus_tag=PF3D7_1000600;size=1251;Alias=124801871,AAN35206.1,10430943,RIF,apicoplastgene,23494871,PF10_0006,rosetting,PF10_0006,XP_001347293.1,cytoadherencescheme,810165,PF3D7_1000600,12368864,Q8IK32	-
Pf3D7	10	57968	58980	10S	pseudo	ID=PF3D7_1000800;Name=PF3D7_1000800;description=stevor%2C+pseudogene;size=1013;web_id=PF3D7_1000800;locus_tag=PF3D7_1000800;size=1013;Alias=rosetting,PF10_0009,PF10_0009,810168,cytoadherencescheme,PF3D7_1000800	-
Pf3D7	10	1591578	1592367	10E		ID=PF3D7_1039700;Name=PF3D7_1039700;description=Pfmc-2TM+Maurer%27s+cleft+two+transmembrane+protein+%28MC-2TM%29;size=790;web_id=PF3D7_1039700;locus_tag=PF3D7_1039700;size=790;Alias=12368864,PF10_0390,Q8IJ11,AAN35587.2,PF10_0390,PF3D7_1039700,810547,MC-2TM,254922502,XP_001347674.2,MCprot,258597173	-
Pf3D7	10	1599900	1601077	10E		ID=PF3D7_1040000;Name=PF3D7_1040000;description=rifin+%28RIF%29;size=1178;web_id=PF3D7_1040000;locus_tag=PF3D7_1040000;size=1178;Alias=AAN35590.1,rosetting,cytoadherencescheme,12368864,PF3D7_1040000,Q8IJ09,RIF,810550,PF10_0393,XP_001347677.1,23495261,10430943,124803042,PF10_0393	-
Pf3D7	10	1602935	1603989	10E		ID=PF3D7_1040100;Name=PF3D7_1040100;description=rifin+%28RIF%29;size=1055;web_id=PF3D7_1040100;locus_tag=PF3D7_1040100;size=1055;Alias=124803044,cytoadherencescheme,10430943,XP_001347678.1,apicoplastgene,PF10_0394,Q8IJ08,AAN35591.1,12368864,810551,PF10_0394,rosetting,23495262,RIF,PF3D7_1040100	-
Pf3D7	10	1605930	1606953	10E		ID=PF3D7_1040200;Name=PF3D7_1040200;description=stevor;size=1024;web_id=PF3D7_1040200;locus_tag=PF3D7_1040200;size=1024;Alias=rosetting,cytoadherencescheme,12477793,124803046,XP_001347679.1,PF3D7_1040200,PF10_0395,Q8IJ07,18474651,AAN35592.1,810552,23495263,PF10_0395,12368864	-
Pf3D7	10	1609063	1610422	10E		ID=PF3D7_1040300;Name=PF3D7_1040300;description=rifin+%28RIF%29;size=1360;web_id=PF3D7_1040300;locus_tag=PF3D7_1040300;size=1360;Alias=PF3D7_1040300,124803048,PF10_0396,23495264,10430943,cytoadherencescheme,Q8IJ06,XP_001347680.1,PF10_0396,RIF,rosetting,810553,12368864,AAN35593.1	-
Pf3D7	10	1612530	1613735	10E		ID=PF3D7_1040400;Name=PF3D7_1040400;description=rifin+%28RIF%29;size=1206;web_id=PF3D7_1040400;locus_tag=PF3D7_1040400;size=1206;Alias=cytoadherencescheme,PF3D7_1040400,23495265,XP_001347681.1,rosetting,Q8IJ05,PF10_0397,810554,12368864,PF10_0397,124803050,RIF,AAN35594.1,10430943	-
Pf3D7	10	1615804	1617070	10E		ID=PF3D7_1040500;Name=PF3D7_1040500;description=rifin+%28RIF%29;size=1267;web_id=PF3D7_1040500;locus_tag=PF3D7_1040500;size=1267;Alias=XP_001347682.1,PF3D7_1040500,23495266,rosetting,12368864,RIF,PF10_0398,124803052,cytoadherencescheme,10430943,PF10_0398,Q8IJ04,AAN35595.1,810555	-
Pf3D7	10	1619086	1620244	10E		ID=PF3D7_1040600;Name=PF3D7_1040600;description=rifin+%28RIF%29;size=1159;web_id=PF3D7_1040600;locus_tag=PF3D7_1040600;size=1159;Alias=PF10_0399,RIF,Q8IJ03,cytoadherencescheme,PF3D7_1040600,rosetting,10430943,810556,12368864,PF10_0399	-
Pf3D7	10	1622368	1623684	10E		ID=PF3D7_1040700;Name=PF3D7_1040700;description=rifin+%28RIF%29;size=1317;web_id=PF3D7_1040700;locus_tag=PF3D7_1040700;size=1317;Alias=RIF,810557,12368864,AAN35597.1,rosetting,cytoadherencescheme,124803060,Q8IJ02,XP_001347684.1,10430943,23495268,PF3D7_1040700,PF10_0400,PF10_0400	-
Pf3D7	10	1625772	1626824	10E		ID=PF3D7_1040800;Name=PF3D7_1040800;description=rifin+%28RIF%29;size=1053;web_id=PF3D7_1040800;locus_tag=PF3D7_1040800;size=1053;Alias=124803064,23495269,AAN35598.1,rosetting,cytoadherencescheme,XP_001347685.1,10430943,PF10_0401,810558,PF3D7_1040800,12368864,PF10_0401,Q8IJ01,RIF	-
Pf3D7	10	1628914	1630023	10E		ID=PF3D7_1040900;Name=PF3D7_1040900;description=rifin+%28RIF%29;size=1110;web_id=PF3D7_1040900;locus_tag=PF3D7_1040900;size=1110;Alias=124803068,rosetting,RIF,cytoadherencescheme,10430943,23495270,AAN35599.1,810559,PF10_0402,Q8IJ00,12368864,PF10_0402,XP_001347686.1,PF3D7_1040900	-
Pf3D7	10	1632398	1633665	10E		ID=PF3D7_1041000;Name=PF3D7_1041000;description=rifin+%28RIF%29;size=1268;web_id=PF3D7_1041000;locus_tag=PF3D7_1041000;size=1268;Alias=23495271,PF3D7_1041000,RIF,12368864,XP_001347687.1,PF10_0403,cytoadherencescheme,rosetting,124803072,810560,Q8IIZ9,PF10_0403,10430943,AAN35600.1	-
Pf3D7	10	1635596	1636779	10E		ID=PF3D7_1041100;Name=PF3D7_1041100;description=rifin+%28RIF%29;size=1184;web_id=PF3D7_1041100;locus_tag=PF3D7_1041100;size=1184;Alias=Q8IIZ8,AAN35601.1,PF3D7_1041100,PF10_0404,810561,PF10_0404,23495272,RIF,124803076,rosetting,cytoadherencescheme,XP_001347688.1,10430943,12368864	-
Pf3D7	10	1639171	1640518	10E		ID=PF3D7_1041200;Name=PF3D7_1041200;description=rifin+%28RIF%29;size=1348;web_id=PF3D7_1041200;locus_tag=PF3D7_1041200;size=1348;Alias=23495273,10430943,PF10_0405,12368864,124803079,PF10_0405,PF3D7_1041200,rosetting,XP_001347689.1,Q8IIZ7,cytoadherencescheme,RIF,AAN35602.1,810562	-
Pf3D7	10	1642401	1649948	10E		ID=PF3D7_1041300;Name=PF3D7_1041300;description=erythrocyte+membrane+protein+1%2C+PfEMP1+%28VAR%29;size=7548;web_id=PF3D7_1041300;locus_tag=PF3D7_1041300;size=7548;Alias=VAR,cytoadherencescheme,rosetting,PF10_0406,1398.t00021,Q8IIZ6,PfEMP1,12368864,AAN35603.2,810563,258597176,254922503,PF10_0406,XP_001347690.2,PF3D7_1041300	-
Pf3D7	11	24160	31598	11S		ID=PF3D7_1100100;Name=PF3D7_1100100;description=erythrocyte+membrane+protein+1%2C+PfEMP1+%28VAR%29;size=7439;web_id=PF3D7_1100100;locus_tag=PF3D7_1100100;size=7439;Alias=11420100,PfEMP1,9230440,124803374,11316367,cytoadherencescheme,23495941,PF3D7_1100100,12368864,rosetting,VAR,9291676,9786187,AAN35604.1,PF11_0007,Q8IIZ5,XP_001347691.1,810585	-
Pf3D7	11	32666	42386	11S		ID=PF3D7_1100200;Name=PF3D7_1100200;description=erythrocyte+membrane+protein+1%2C+PfEMP1+%28VAR%29;size=9721;web_id=PF3D7_1100200;locus_tag=PF3D7_1100200;size=9721;Alias=11316367,9230440,810584,PfEMP1,PF11_0008,PF11_0008,124803377,rosetting,VAR,23495942,XP_001347692.1,11420100,Q8IIZ4,cytoadherencescheme,9291676,AAN35605.1,PF3D7_1100200,12368864,9786187	-
Pf3D7	11	45056	46233	11S		ID=PF3D7_1100300;Name=PF3D7_1100300;description=rifin+%28RIF%29;size=1178;web_id=PF3D7_1100300;locus_tag=PF3D7_1100300;size=1178;Alias=23495943,810583,RIF,AAN35606.1,PF3D7_1100300,12368864,XP_001347693.1,PF11_0009,124803379,Q8IIZ3,10430943,rosetting,PF11_0009,cytoadherencescheme	-
Pf3D7	11	48112	49307	11S		ID=PF3D7_1100400;Name=PF3D7_1100400;description=rifin+%28RIF%29;size=1196;web_id=PF3D7_1100400;locus_tag=PF3D7_1100400;size=1196;Alias=12368864,Q8IIZ2,810582,XP_001347694.1,PF3D7_1100400,10430943,RIF,124803382,PF11_0010,cytoadherencescheme,23495944,PF11_0010,rosetting,apicoplastgene,AAN35607.1	-
Pf3D7	11	51623	52751	11S		ID=PF3D7_1100500;Name=PF3D7_1100500;description=rifin+%28RIF%29;size=1129;web_id=PF3D7_1100500;locus_tag=PF3D7_1100500;size=1129;Alias=XP_001347695.1,23495945,PF3D7_1100500,PF11_0011,RIF,10430943,810581,PF11_0011,rosetting,cytoadherencescheme,124803385,Q8IIZ1,12368864,AAN35608.1	-
Pf3D7	11	56792	57840	11S	pseudo	ID=PF3D7_1100700;Name=PF3D7_1100700;description=stevor%2C+pseudogene;size=1049;web_id=PF3D7_1100700;locus_tag=PF3D7_1100700;size=1049;Alias=810579,rosetting,PF11_0013,Q8IIY9,PF3D7_1100700,apicoplastgene,12368864,cytoadherencescheme,PF11_0013,12477793	-
Pf3D7	11	59550	60328	11S		ID=PF3D7_1100800;Name=PF3D7_1100800;description=Pfmc-2TM+Maurer%27s+cleft+two+transmembrane+protein+%28MC-2TM%29;size=779;web_id=PF3D7_1100800;locus_tag=PF3D7_1100800;size=779;Alias=PF11_0014,MC-2TM,254832582,PF11_0014,258597178,AAN35611.2,810578,MCprot,Q8IIY8,XP_001347698.2,PF3D7_1100800	-
Pf3D7	11	66686	67965	11S		ID=PF3D7_1101100;Name=PF3D7_1101100;description=rifin+%28RIF%29;size=1280;web_id=PF3D7_1101100;locus_tag=PF3D7_1101100;size=1280;Alias=Q8IIY5,RIF,23495951,PF11_0529,810574,XP_001347701.1,PF11_0529,PF3D7_1101100,124803397,rosetting,AAN35614.1,10430943,12368864,cytoadherencescheme	-
Pf3D7	11	70081	71289	11S		ID=PF3D7_1101200;Name=PF3D7_1101200;description=rifin+%28RIF%29;size=1209;web_id=PF3D7_1101200;locus_tag=PF3D7_1101200;size=1209;Alias=AAN35615.1,cytoadherencescheme,23495952,810573,PF11_0020,124803399,rosetting,10430943,Q8IIY4,RIF,XP_001347702.1,PF3D7_1101200,PF11_0020,12368864	-
Pf3D7	11	73244	74442	11S		ID=PF3D7_1101300;Name=PF3D7_1101300;description=rifin+%28RIF%29;size=1199;web_id=PF3D7_1101300;locus_tag=PF3D7_1101300;size=1199;Alias=Q8IIY3,124803401,cytoadherencescheme,10430943,12368864,RIF,AAN35616.1,PF11_0021,PF11_0021,PF3D7_1101300,XP_001347703.1,23495953,rosetting,810599	-
Pf3D7	11	76820	78000	11S	pseudo	ID=PF3D7_1101400;Name=PF3D7_1101400;description=rifin%2C+pseudogene+%28RIF%29;size=1181;web_id=PF3D7_1101400;locus_tag=PF3D7_1101400;size=1181;Alias=cytoadherencescheme,rosetting,PF11_0022,apicoplastgene,PF3D7_1101400,RIF,810571,PF11_0022	-
Pf3D7	11	85629	86418	11S		ID=PF3D7_1101700;Name=PF3D7_1101700;description=Pfmc-2TM+Maurer%27s+cleft+two+transmembrane+protein+%28MC-2TM%29;size=790;web_id=PF3D7_1101700;locus_tag=PF3D7_1101700;size=790;Alias=23495956,PF3D7_1101700,Q8IIY1,PF11_0025,AAN35619.1,XP_001347706.1,MC-2TM,124803408,810569,MCprot,PF11_0025	-
Pf3D7	11	2006706	2007829	11E		ID=PF3D7_1149800;Name=PF3D7_1149800;description=rifin+%28RIF%29;size=1124;web_id=PF3D7_1149800;locus_tag=PF3D7_1149800;size=1124;Alias=23496428,811047,PF3D7_1149800,10430943,124804988,RIF,rosetting,AAN36084.1,12368864,PF11_0515,PF11_0515,Q8IHM5,XP_001348171.1,cytoadherencescheme	-
Pf3D7	11	2009875	2010902	11E		ID=PF3D7_1149900;Name=PF3D7_1149900;description=stevor;size=1028;web_id=PF3D7_1149900;locus_tag=PF3D7_1149900;size=1028;Alias=PF11_0516,cytoadherencescheme,124804991,PF3D7_1149900,apicoplastgene,12368864,12477793,811048,23496429,AAN36085.1,rosetting,Q8IHM4,PF11_0516,XP_001348172.1	-
Pf3D7	11	2012989	2014316	11E		ID=PF3D7_1150000;Name=PF3D7_1150000;description=rifin+%28RIF%29;size=1328;web_id=PF3D7_1150000;locus_tag=PF3D7_1150000;size=1328;Alias=258597446,XP_001348173.2,254832740,rosetting,PF11_0517,RIF,PF11_0517,AAN36086.2,12368864,10430943,Q8IHM3,PF3D7_1150000,cytoadherencescheme,811049	-
Pf3D7	11	2015649	2016509	11E	pseudo	ID=PF3D7_1150100;Name=PF3D7_1150100;description=rifin%2C+pseudogene+%28RIF%29;size=861;web_id=PF3D7_1150100;locus_tag=PF3D7_1150100;size=861;Alias=PF11_0518,811050,PF3D7_1150100,rosetting,cytoadherencescheme,PF11_0518,RIF	-
Pf3D7	11	2018714	2019967	11E		ID=PF3D7_1150200;Name=PF3D7_1150200;description=rifin+%28RIF%29;size=1254;web_id=PF3D7_1150200;locus_tag=PF3D7_1150200;size=1254;Alias=124804998,PF3D7_1150200,Q8IHM2,XP_001348174.1,cytoadherencescheme,10430943,12368864,PF11_0519,23496431,PF11_0519,RIF,AAN36087.1,811051,rosetting	-
Pf3D7	11	2021854	2023034	11E		ID=PF3D7_1150300;Name=PF3D7_1150300;description=rifin+%28RIF%29;size=1181;web_id=PF3D7_1150300;locus_tag=PF3D7_1150300;size=1181;Alias=PF3D7_1150300,rosetting,RIF,cytoadherencescheme,23496432,Q8IHM1,XP_001348175.1,PF11_0520,124805002,12368864,10430943,PF11_0520,811052,AAN36088.1	-
Pf3D7	11	2025817	2035886	11E		ID=PF3D7_1150400;Name=PF3D7_1150400;description=erythrocyte+membrane+protein+1%2C+PfEMP1+%28VAR%29;size=10070;web_id=PF3D7_1150400;locus_tag=PF3D7_1150400;size=10070;Alias=811053,9786187,VAR,cytoadherencescheme,23496433,11420100,9230440,AAN36089.1,XP_001348176.1,124805005,12368864,11316367,PF3D7_1150400,rosetting,PF11_0521,9291676,Q8IHM0,PF11_0521,PfEMP1	-
Pf3D7	12	16973	24497	12S		ID=PF3D7_1200100;Name=PF3D7_1200100;description=erythrocyte+membrane+protein+1%2C+PfEMP1+%28VAR%29;size=7525;web_id=PF3D7_1200100;locus_tag=PF3D7_1200100;size=7525;Alias=2277.t00001,AAN36090.1,cytoadherencescheme,Q8I643,23496532,PfEMP1,811065,XP_001350410.1,MAL12P1.1,PF3D7_1200100,PFL0005w,rosetting,124805331,VAR	-
Pf3D7	12	26321	27687	12S		ID=PF3D7_1200200;Name=PF3D7_1200200;description=rifin+%28RIF%29;size=1367;web_id=PF3D7_1200200;locus_tag=PF3D7_1200200;size=1367;Alias=PFL0010c,2277.t00002,cytoadherencescheme,XP_001350411.1,PFL0010c,Q8I642,23496533,124805335,PF3D7_1200200,AAN36091.1,rosetting,MAL12P1.2,RIF,811064	-
Pf3D7	12	30078	31261	12S		ID=PF3D7_1200300;Name=PF3D7_1200300;description=rifin+%28RIF%29;size=1184;web_id=PF3D7_1200300;locus_tag=PF3D7_1200300;size=1184;Alias=811063,RIF,XP_001350412.1,Q8I641,cytoadherencescheme,AAN36092.1,PF3D7_1200300,23496534,2277.t00003,124805339,rosetting,PFL0015c,MAL12P1.3,PFL0015c	-
Pf3D7	12	32703	41940	12S		ID=PF3D7_1200400;Name=PF3D7_1200400;description=erythrocyte+membrane+protein+1%2C+PfEMP1+%28VAR%29;size=9238;web_id=PF3D7_1200400;locus_tag=PF3D7_1200400;size=9238;Alias=cytoadherencescheme,MAL12P1.4,XP_001350413.1,AAN36093.1,PF3D7_1200400,811062,PfEMP1,VAR,PFL0020w,PFL0020w,rosetting,Q8I640,2277.t00004,23496535,124805343	-
Pf3D7	12	43800	45106	12S		ID=PF3D7_1200500;Name=PF3D7_1200500;description=rifin+%28RIF%29;size=1307;web_id=PF3D7_1200500;locus_tag=PF3D7_1200500;size=1307;Alias=cytoadherencescheme,rosetting,PF3D7_1200500,811061,2277.t00005,PFL0025c,PFL0025c,MAL12P1.5,124805347,RIF,23496536,PF13_0363,XP_001350414.1,Q8I0E0,AAN36094.1	-
Pf3D7	12	46788	56805	12S		ID=PF3D7_1200600;Name=PF3D7_1200600;description=erythrocyte+membrane+protein+1%2C+PfEMP1+%28VAR2CSA%29;size=10018;web_id=PF3D7_1200600;locus_tag=PF3D7_1200600;size=10018;Alias=VAR2CSA,PFL0030c,cytoadherencescheme,MAL12P1.6,AAN36095.1,PF3D7_1200600,PfEMP1,rosetting,Q8I639,23496537,XP_001350415.1,811060,124805350,PFL0030c,2277.t00006	-
Pf3D7	12	764448	765151	12M1	pseudo	ID=PF3D7_1219200;Name=PF3D7_1219200;description=rifin%2C+pseudogene+%28RIF%29;size=704;web_id=PF3D7_1219200;locus_tag=PF3D7_1219200;size=704;Alias=PFL0933w,8445023,PFL0933w,PF3D7_1219200,RIF	-
Pf3D7	12	766654	774197	12M1		ID=PF3D7_1219300;Name=PF3D7_1219300;description=erythrocyte+membrane+protein+1%2C+PfEMP1+%28VAR%29;size=7544;web_id=PF3D7_1219300;locus_tag=PF3D7_1219300;size=7544;Alias=cytoadherencescheme,PFL0935c,811239,124805987,PfEMP1,MAL12P1.188,rosetting,VAR,PF3D7_1219300,2277.t00187,PFL0935c,AAN36275.1,XP_001350595.1,23496720,Q8I5L5	-
Pf3D7	12	776510	779933	12M1	pseudo	ID=PF3D7_1219400;Name=PF3D7_1219400;description=erythrocyte+membrane+protein+1+%28PfEMP1%29%2C+pseudogene+%28VAR+pseudogene%29;size=3424;web_id=PF3D7_1219400;locus_tag=PF3D7_1219400;size=3424;Alias=2277.t00188,PFL0940c,PF3D7_1219400,cytoadherencescheme,811240,PFL0940c,PF12_0001,VAR pseudogene,rosetting	-
Pf3D7	12	783970	784830	12M1	pseudo	ID=PF3D7_1219500;Name=PF3D7_1219500;description=erythrocyte+membrane+protein+1+%28PfEMP1%29%2C+exon2%2C+pseudogene+%28VAR+pseudogene%29;size=861;web_id=PF3D7_1219500;locus_tag=PF3D7_1219500;size=861;Alias=VAR pseudogene,PF12_0002,2277.t00189,cytoadherencescheme,811241,rosetting,PF3D7_1219500,PFL0945w,PFL0945w	-
Pf3D7	12	1694150	1703087	12M2		ID=PF3D7_1240300;Name=PF3D7_1240300;description=erythrocyte+membrane+protein+1%2C+PfEMP1+%28VAR%29;size=8938;web_id=PF3D7_1240300;locus_tag=PF3D7_1240300;size=8938;Alias=rosetting,2277.t00390,AAN36476.1,VAR,124806687,Q8I521,811442,XP_001350796.1,MAL12P1.388,PFL1950w,PFL1950w,23496924,PF3D7_1240300,cytoadherencescheme	-
Pf3D7	12	1704512	1712490	12M2		ID=PF3D7_1240400;Name=PF3D7_1240400;description=erythrocyte+membrane+protein+1%2C+PfEMP1+%28VAR%29;size=7979;web_id=PF3D7_1240400;locus_tag=PF3D7_1240400;size=7979;Alias=2277.t00391,Q8I520,23496925,MAL12P1.389,XP_001350797.1,AAN36477.1,PFL1955w,PF3D7_1240400,cytoadherencescheme,PFL1955w,VAR,124806689,811443,PfEMP1,rosetting	-
Pf3D7	12	1719574	1727456	12M2		ID=PF3D7_1240600;Name=PF3D7_1240600;description=erythrocyte+membrane+protein+1%2C+PfEMP1+%28VAR%29;size=7883;web_id=PF3D7_1240600;locus_tag=PF3D7_1240600;size=7883;Alias=124806691,rosetting,23496926,PfEMP1,VAR,PFL1960w,Q8I519,811444,PF3D7_1240600,AAN36478.1,MAL12P1.390,2277.t00392,cytoadherencescheme,XP_001350798.1,PFL1960w	-
Pf3D7	12	1728774	1730007	12M2	pseudo	ID=PF3D7_1240700;Name=PF3D7_1240700;description=rifin%2C+pseudogene+%28RIF%29;size=1234;web_id=PF3D7_1240700;locus_tag=PF3D7_1240700;size=1234;Alias=PF12_0007,cytoadherencescheme,rosetting,RIF,2277.t00393,PFL1965w,PFL1965w,PF3D7_1240700,811445	-
Pf3D7	12	2188760	2189613	12E	pseudo	ID=PF3D7_1253600;Name=PF3D7_1253600;description=rifin%2C+pseudogene+%28RIF%29;size=854;web_id=PF3D7_1253600;locus_tag=PF3D7_1253600;size=854;Alias=2277.t00514,cytoadherencescheme,811566,MAL12P1.511,RIF,PFL2580w,PF3D7_1253600,PFL2580w,rosetting	-
Pf3D7	12	2190483	2191770	12E		ID=PF3D7_1253700;Name=PF3D7_1253700;description=rifin+%28RIF%29;size=1288;web_id=PF3D7_1253700;locus_tag=PF3D7_1253700;size=1288;Alias=AAN36599.1,PF3D7_1253700,124807141,811567,MAL12P1.512,23497049,PFL2585c,XP_001350919.1,PFL2585c,RIF,cytoadherencescheme,rosetting,2277.t00515,Q8I4Q0	-
Pf3D7	12	2201495	2202686	12E		ID=PF3D7_1254000;Name=PF3D7_1254000;description=rifin+%28RIF%29;size=1192;web_id=PF3D7_1254000;locus_tag=PF3D7_1254000;size=1192;Alias=PFL2605w,Q8I4P7,MAL12P1.516,811571,rosetting,RIF,2277.t00519,XP_001350923.1,AAN36603.1,PFL2605w,23497053,PF3D7_1254000,124807160,cytoadherencescheme	-
Pf3D7	12	2204724	2205714	12E		ID=PF3D7_1254100;Name=PF3D7_1254100;description=stevor+%28stevor%29;size=991;web_id=PF3D7_1254100;locus_tag=PF3D7_1254100;size=991;Alias=apicoplastgene,AAN36604.1,12368864,rosetting,XP_001350924.1,2277.t00520,23497054,Q8I4P6,MAL12P1.517,811572,stevor,PF3D7_1254100,PFL2610w,124807163,cytoadherencescheme,PFL2610w	-
Pf3D7	12	2207830	2209115	12E		ID=PF3D7_1254200;Name=PF3D7_1254200;description=rifin+%28RIF%29;size=1286;web_id=PF3D7_1254200;locus_tag=PF3D7_1254200;size=1286;Alias=XP_001350925.1,811573,Q8I4P5,rosetting,PFL2615w,AAN36605.1,23497055,MAL12P1.518,cytoadherencescheme,PF3D7_1254200,2277.t00521,124807168,RIF,PFL2615w	-
Pf3D7	12	2211543	2212554	12E		ID=PF3D7_1254300;Name=PF3D7_1254300;description=stevor+%28stevor%29;size=1012;web_id=PF3D7_1254300;locus_tag=PF3D7_1254300;size=1012;Alias=XP_001350926.2,MAL12P1.519,811574,2277.t00522,PF3D7_1254300,Q8I4P4,PFL2620w,254945435,258597606,PFL2620w,12368864,cytoadherencescheme,AAN36606.2,rosetting,stevor	-
Pf3D7	12	2214671	2216019	12E		ID=PF3D7_1254400;Name=PF3D7_1254400;description=rifin+%28RIF%29;size=1349;web_id=PF3D7_1254400;locus_tag=PF3D7_1254400;size=1349;Alias=811575,PF3D7_1254400,2277.t00523,Q8I4P3,RIF,cytoadherencescheme,23497057,rosetting,XP_001350927.1,PFL2625w,MAL12P1.520,124807177,AAN36607.1,PFL2625w	-
Pf3D7	12	2218452	2219533	12E		ID=PF3D7_1254500;Name=PF3D7_1254500;description=rifin+%28RIF%29;size=1082;web_id=PF3D7_1254500;locus_tag=PF3D7_1254500;size=1082;Alias=124807182,23497058,PF3D7_1254500,2277.t00524,rosetting,cytoadherencescheme,AAN36608.1,MAL12P1.521,PFL2630w,XP_001350928.1,811576,Q8I4P2,RIF,PFL2630w	-
Pf3D7	12	2221835	2222848	12E		ID=PF3D7_1254600;Name=PF3D7_1254600;description=stevor+%28stevor%29;size=1014;web_id=PF3D7_1254600;locus_tag=PF3D7_1254600;size=1014;Alias=2277.t00525,PFL2635w,PF3D7_1254600,Q8I4P1,stevor,PFL2635w,12368864,cytoadherencescheme,MAL12P1.522,811577,rosetting	-
Pf3D7	12	2224997	2226201	12E		ID=PF3D7_1254700;Name=PF3D7_1254700;description=rifin+%28RIF%29;size=1205;web_id=PF3D7_1254700;locus_tag=PF3D7_1254700;size=1205;Alias=2277.t00526,PFL2640c,23497060,PFL2640c,PF3D7_1254700,XP_001350930.1,AAN36610.1,rosetting,124807190,RIF,MAL12P1.523,811578,cytoadherencescheme,Q8I4P0	-
Pf3D7	12	2228632	2229740	12E		ID=PF3D7_1254800;Name=PF3D7_1254800;description=rifin+%28RIF%29;size=1109;web_id=PF3D7_1254800;locus_tag=PF3D7_1254800;size=1109;Alias=Q8I4N9,rosetting,cytoadherencescheme,PFL2645c,RIF,XP_001350931.1,AAN36611.1,23497061,PFL2645c,PF3D7_1254800,MAL12P1.524,811579,124807193,2277.t00527	-
Pf3D7	12	2234600	2235792	12E		ID=PF3D7_1255000;Name=PF3D7_1255000;description=rifin+%28RIF%29;size=1193;web_id=PF3D7_1255000;locus_tag=PF3D7_1255000;size=1193;Alias=PFL2655w,23497063,AAN36613.1,811581,PF3D7_1255000,rosetting,cytoadherencescheme,PFL2655w,2277.t00529,MAL12P1.526,XP_001350933.1,124807203,Q8I4N7,RIF	-
Pf3D7	12	2238210	2239417	12E		ID=PF3D7_1255100;Name=PF3D7_1255100;description=rifin+%28RIF%29;size=1208;web_id=PF3D7_1255100;locus_tag=PF3D7_1255100;size=1208;Alias=23497064,AAN36614.1,RIF,rosetting,MAL12P1.527,124807208,cytoadherencescheme,PFL2660w,PF3D7_1255100,2277.t00530,PFL2660w,Q8I4N6,811582,XP_001350934.1	-
Pf3D7	12	2241271	2248962	12E		ID=PF3D7_1255200;Name=PF3D7_1255200;description=erythrocyte+membrane+protein+1%2C+PfEMP1+%28VAR%29;size=7692;web_id=PF3D7_1255200;locus_tag=PF3D7_1255200;size=7692;Alias=124807212,VAR,AAN36615.1,XP_001350935.1,rosetting,2277.t00531,PF3D7_1255200,PfEMP1,PFL2665c,811583,Q8I4N5,MAL12P1.528,23497065,cytoadherencescheme,PFL2665c	-
Pf3D7	13	21364	28787	13S		ID=PF3D7_1300100;Name=PF3D7_1300100;description=erythrocyte+membrane+protein+1%2C+PfEMP1+%28VAR%29;size=7424;web_id=PF3D7_1300100;locus_tag=PF3D7_1300100;size=7424;Alias=813647,PF3D7_1300100,XP_001349738.1,PF13_0001,CAD52143.1,23615155,cytoadherencescheme,MAL13P1.1,124512764,VAR,Q8IEV1,PfEMP1,rosetting	-
Pf3D7	13	30605	31881	13S		ID=PF3D7_1300200;Name=PF3D7_1300200;description=rifin+%28RIF%29;size=1277;web_id=PF3D7_1300200;locus_tag=PF3D7_1300200;size=1277;Alias=XP_001349739.1,CAD52144.1,cytoadherencescheme,124512766,23615156,MAL13P1.2,Q8IEV0,RIF,rosetting,PF13_0002,MAL13P1.2,813755,PF3D7_1300200	-
Pf3D7	13	33959	44742	13S		ID=PF3D7_1300300;Name=PF3D7_1300300;description=erythrocyte+membrane+protein+1%2C+PfEMP1+%28VAR%29;size=10784;web_id=PF3D7_1300300;locus_tag=PF3D7_1300300;size=10784;Alias=PF3D7_1300300,124512768,23615157,VAR,cytoadherencescheme,813648,Q8IEU9,CAD52145.1,PF13_0003,PF13_0003,rosetting,PfEMP1,XP_001349740.1	-
Pf3D7	13	47583	48769	13S		ID=PF3D7_1300400;Name=PF3D7_1300400;description=rifin+%28RIF%29;size=1187;web_id=PF3D7_1300400;locus_tag=PF3D7_1300400;size=1187;Alias=XP_001349741.1,PF13_0004,CAD52146.1,rosetting,124512770,813753,cytoadherencescheme,23615158,PF13_0004,PF3D7_1300400,RIF,Q8IEU8	-
Pf3D7	13	50662	51857	13S		ID=PF3D7_1300500;Name=PF3D7_1300500;description=rifin+%28RIF%29;size=1196;web_id=PF3D7_1300500;locus_tag=PF3D7_1300500;size=1196;Alias=PF3D7_1300500,124512772,PF13_0005,Q8IEU7,4794210,rosetting,CAD52147.1,XP_001349742.1,PF13_0005,23615159,RIF,cytoadherencescheme	-
Pf3D7	13	54067	55259	13S		ID=PF3D7_1300600;Name=PF3D7_1300600;description=rifin+%28RIF%29;size=1193;web_id=PF3D7_1300600;locus_tag=PF3D7_1300600;size=1193;Alias=rosetting,PF3D7_1300600,23615160,XP_001349743.1,RIF,cytoadherencescheme,124512774,4794211,PF13_0006,PF13_0006,CAD52148.1,Q8IEU6	-
Pf3D7	13	57109	58422	13S		ID=PF3D7_1300700;Name=PF3D7_1300700;description=rifin+%28RIF%29;size=1314;web_id=PF3D7_1300700;locus_tag=PF3D7_1300700;size=1314;Alias=Q8IEU5,CAD52149.1,cytoadherencescheme,23615161,PF3D7_1300700,813756,MAL13P1.4,XP_001349744.1,RIF,MAL13P1.4,124512776,PF13_0007,rosetting	-
Pf3D7	13	60097	61172	13S		ID=PF3D7_1300800;Name=PF3D7_1300800;description=erythrocyte+membrane+protein+1-like+%28VAR-like%29;size=1076;web_id=PF3D7_1300800;locus_tag=PF3D7_1300800;size=1076;Alias=MAL13P1.6,MAL13P1.6,225631927,296005325,4794212,VAR-like,rosetting,C0H594,PF3D7_1300800,CAX64272.1,cytoadherencescheme,XP_002808991.1	-
Pf3D7	13	62515	63547	13S		ID=PF3D7_1300900;Name=PF3D7_1300900;description=stevor+%28stevor%29;size=1033;web_id=PF3D7_1300900;locus_tag=PF3D7_1300900;size=1033;Alias=MAL13P1.7,MAL13P1.7,23615162,apicoplastgene,124512778,813959,Q8IEU4,rosetting,stevor,PF3D7_1300900,cytoadherencescheme,CAD52151.1,PF13_0009,XP_001349745.1	-
Pf3D7	13	65548	66816	13S	pseudo	ID=PF3D7_1301000;Name=PF3D7_1301000;description=rifin%2C+pseudogene+%28RIF%29;size=1269;web_id=PF3D7_1301000;locus_tag=PF3D7_1301000;size=1269;Alias=4794213,MAL13P1.8,RIF,cytoadherencescheme,rosetting,MAL13P1.8,PF3D7_1301000	-
Pf3D7	13	2854544	2855568	13E	pseudo	ID=PF3D7_1372500;Name=PF3D7_1372500;description=stevor%2C+pseudogene;size=1025;web_id=PF3D7_1372500;locus_tag=PF3D7_1372500;size=1025;Alias=cytoadherencescheme,9222000,MAL13P1.490,MAL13P1.490,PF3D7_1372500,rosetting,C0H5N1	-
Pf3D7	13	2856586	2858026	13E		ID=PF3D7_1372600;Name=PF3D7_1372600;description=rifin+%28RIF%29;size=1441;web_id=PF3D7_1372600;locus_tag=PF3D7_1372600;size=1441;Alias=225632079,MAL13P1.495,XP_002809129.1,296005630,rosetting,C0H5N2,cytoadherencescheme,RIF,PF3D7_1372600,CAX64412.1,MAL13P1.495,9222032	-
Pf3D7	13	2860163	2861441	13E		ID=PF3D7_1372700;Name=PF3D7_1372700;description=rifin+%28RIF%29;size=1279;web_id=PF3D7_1372700;locus_tag=PF3D7_1372700;size=1279;Alias=CAX64413.1,PF3D7_1372700,cytoadherencescheme,XP_002809130.1,C0H5N3,RIF,MAL13P1.500,9222027,MAL13P1.500,296005632,225632080,rosetting	-
Pf3D7	13	2863866	2864869	13E		ID=PF3D7_1372800;Name=PF3D7_1372800;description=stevor;size=1004;web_id=PF3D7_1372800;locus_tag=PF3D7_1372800;size=1004;Alias=cytoadherencescheme,CAX64414.1,C0H5N4,9222028,XP_002809131.1,rosetting,MAL13P1.505,MAL13P1.505,PF3D7_1372800,296005634,225632081	-
Pf3D7	13	2865893	2867226	13E	pseudo	ID=PF3D7_1372900;Name=PF3D7_1372900;description=erythrocyte+membrane+protein+1+%28PfEMP1%29%2C+exon2%2C+pseudogene+%28VAR+pseudogene%29;size=1334;web_id=PF3D7_1372900;locus_tag=PF3D7_1372900;size=1334;Alias=cytoadherencescheme,PF3D7_1372900,MAL13P1.510,MAL13P1.510,rosetting,9222033,VAR pseudogene	-
Pf3D7	13	2868923	2870165	13E		ID=PF3D7_1373000;Name=PF3D7_1373000;description=rifin+%28RIF%29;size=1243;web_id=PF3D7_1373000;locus_tag=PF3D7_1373000;size=1243;Alias=225632082,296005636,rosetting,XP_002809132.1,RIF,MAL13P1.515,cytoadherencescheme,PF3D7_1373000,CAX64416.1,C0H5N5,9222034,MAL13P1.515	-
Pf3D7	13	2871860	2873088	13E		ID=PF3D7_1373100;Name=PF3D7_1373100;description=rifin+%28RIF%29;size=1229;web_id=PF3D7_1373100;locus_tag=PF3D7_1373100;size=1229;Alias=MAL13P1.520,225632083,MAL13P1.520,rosetting,C0H5N6,PF3D7_1373100,CAX64417.1,XP_002809133.1,RIF,cytoadherencescheme,296005638,9222029	-
Pf3D7	13	2877908	2879141	13E		ID=PF3D7_1373300;Name=PF3D7_1373300;description=rifin+%28RIF%29;size=1234;web_id=PF3D7_1373300;locus_tag=PF3D7_1373300;size=1234;Alias=XP_002809135.1,296005642,MAL13P1.530,cytoadherencescheme,225632085,9222001,C0H5N8,CAX64419.1,RIF,rosetting,PF3D7_1373300,MAL13P1.530	-
Pf3D7	13	2881591	2882956	13E		ID=PF3D7_1373400;Name=PF3D7_1373400;description=rifin+%28RIF%29;size=1366;web_id=PF3D7_1373400;locus_tag=PF3D7_1373400;size=1366;Alias=rosetting,C0H5N9,cytoadherencescheme,MAL13P1.535,CAX64420.1,XP_002809136.1,MAL13P1.535,296005644,9222002,PF3D7_1373400,225632086,RIF	-
Pf3D7	13	2884786	2892340	13E		ID=PF3D7_1373500;Name=PF3D7_1373500;description=erythrocyte+membrane+protein+1%2C+PfEMP1+%28VAR%29;size=7555;web_id=PF3D7_1373500;locus_tag=PF3D7_1373500;size=7555;Alias=23615826,XP_001350409.1,MAL13P1.356,PfEMP1,rosetting,VAR,PF3D7_1373500,cytoadherencescheme,PF13_0364,MAL13P1.356,813649,124514106,Q8ID12,CAD52819.1	-
Pf3D7	14	7208	8538	14S		ID=PF3D7_1400200;Name=PF3D7_1400200;description=rifin+%28RIF%29;size=1331;web_id=PF3D7_1400200;locus_tag=PF3D7_1400200;size=1331;Alias=PF14_0002,258597608,PF14_0002,255528742,Q8IM85,PF3D7_1400200,cytoadherencescheme,RIF,10430943,811600,XP_001348177.2,AAN36616.2,rosetting,12368864	-
Pf3D7	14	10974	12117	14S		ID=PF3D7_1400300;Name=PF3D7_1400300;description=rifin+%28RIF%29;size=1144;web_id=PF3D7_1400300;locus_tag=PF3D7_1400300;size=1144;Alias=RIF,Q8I0G7,PF14_0003,cytoadherencescheme,AAN36617.1,XP_001348178.1,124807925,PF3D7_1400300,PF14_0003,rosetting,23497068,12368864,10430943,811596	-
Pf3D7	14	14126	15363	14S		ID=PF3D7_1400400;Name=PF3D7_1400400;description=rifin+%28RIF%29;size=1238;web_id=PF3D7_1400400;locus_tag=PF3D7_1400400;size=1238;Alias=23497069,XP_001348179.1,124807929,AAN36618.1,cytoadherencescheme,10430943,rosetting,811586,Q8IM84,PF3D7_1400400,12368864,RIF,PF14_0004,PF14_0004	-
Pf3D7	14	17469	18808	14S		ID=PF3D7_1400500;Name=PF3D7_1400500;description=rifin+%28RIF%29;size=1340;web_id=PF3D7_1400500;locus_tag=PF3D7_1400500;size=1340;Alias=PF14_0005,124807933,PF3D7_1400500,12368864,rosetting,811605,RIF,23497070,Q8IM83,XP_001348180.1,10430943,cytoadherencescheme,PF14_0005,AAN36619.1	-
Pf3D7	14	20897	22232	14S		ID=PF3D7_1400600;Name=PF3D7_1400600;description=rifin+%28RIF%29;size=1336;web_id=PF3D7_1400600;locus_tag=PF3D7_1400600;size=1336;Alias=23497071,Q8IM82,811606,cytoadherencescheme,12368864,PF3D7_1400600,rosetting,AAN36620.1,10430943,RIF,PF14_0006,PF14_0006,124807938,XP_001348181.1	-
Pf3D7	14	24337	25320	14S		ID=PF3D7_1400700;Name=PF3D7_1400700;description=stevor;size=984;web_id=PF3D7_1400700;locus_tag=PF3D7_1400700;size=984;Alias=PF14_0007,AAN36621.1,Q8IM81,811603,124807943,PF14_0007,23497072,12368864,PF3D7_1400700,XP_001348182.1,cytoadherencescheme,rosetting	-
Pf3D7	14	27321	28428	14S		ID=PF3D7_1400800;Name=PF3D7_1400800;description=rifin+%28RIF%29;size=1108;web_id=PF3D7_1400800;locus_tag=PF3D7_1400800;size=1108;Alias=rosetting,AAN36622.1,811602,124807947,XP_001348183.1,RIF,Q8IM80,PF14_0008,23497073,PF3D7_1400800,10430943,PF14_0008,cytoadherencescheme,12368864	-
Pf3D7	14	3266136	3267377	14E		ID=PF3D7_1479400;Name=PF3D7_1479400;description=rifin+%28RIF%29;size=1242;web_id=PF3D7_1479400;locus_tag=PF3D7_1479400;size=1242;Alias=812347,rosetting,PF14_0766,AAN37378.1,Q8IK44,23497841,12368864,PF14_0766,cytoadherencescheme,XP_001348939.1,RIF,10430943,124810591,PF3D7_1479400	-
Pf3D7	14	3269494	3270496	14E		ID=PF3D7_1479500;Name=PF3D7_1479500;description=stevor;size=1003;web_id=PF3D7_1479500;locus_tag=PF3D7_1479500;size=1003;Alias=12368864,PF3D7_1479500,12477793,cytoadherencescheme,PF14_0767,Q8IK43,AAN37379.1,XP_001348940.1,812348,rosetting,124810593,23497842,PF14_0767	-
Pf3D7	14	3272578	3273848	14E		ID=PF3D7_1479600;Name=PF3D7_1479600;description=rifin+%28RIF%29;size=1271;web_id=PF3D7_1479600;locus_tag=PF3D7_1479600;size=1271;Alias=10430943,RIF,rosetting,255528959,PF14_0768,XP_001348941.2,PF3D7_1479600,12368864,Q8IK42,812349,AAN37380.2,PF14_0768,258597983,cytoadherencescheme	-
Pf3D7	14	3276230	3277501	14E		ID=PF3D7_1479700;Name=PF3D7_1479700;description=rifin+%28RIF%29;size=1272;web_id=PF3D7_1479700;locus_tag=PF3D7_1479700;size=1272;Alias=PF14_0769,RIF,XP_001348942.1,Q8IK41,cytoadherencescheme,PF14_0769,124810597,10430943,23497844,12368864,PF3D7_1479700,812350,AAN37381.1,rosetting	-
Pf3D7	14	3279500	3280662	14E		ID=PF3D7_1479800;Name=PF3D7_1479800;description=rifin+%28RIF%29;size=1163;web_id=PF3D7_1479800;locus_tag=PF3D7_1479800;size=1163;Alias=812351,rosetting,apicoplastgene,PF3D7_1479800,XP_001348943.1,Q8IK40,PF14_0770,23497845,AAN37382.1,124810600,10430943,12368864,RIF,PF14_0770,cytoadherencescheme	-
Pf3D7	14	3282729	3283752	14E		ID=PF3D7_1479900;Name=PF3D7_1479900;description=stevor;size=1024;web_id=PF3D7_1479900;locus_tag=PF3D7_1479900;size=1024;Alias=Q8IK39,PF3D7_1479900,PF14_0771,12368864,PF14_0771,rosetting,12477793,812352,cytoadherencescheme	-
Pf3D7	14	3285900	3287003	14E		ID=PF3D7_1480000;Name=PF3D7_1480000;description=rifin+%28RIF%29;size=1104;web_id=PF3D7_1480000;locus_tag=PF3D7_1480000;size=1104;Alias=PF3D7_1480000,rosetting,10430943,PF14_0772,812353,PF14_0772,AAN37384.1,124810604,RIF,Q8IK38,XP_001348945.1,23497847,cytoadherencescheme,12368864	-

## Sheet: VRSM cluster boundaries
chr	clusterName	start	end	number of VRSM genes	number of pseudo VRSM genes	clusterLength	internal?
1	1S	29510	95899	16	4	66389	No
1	1E	547597	614893	8	1	67296	No
2	2S	25232	67545	10	1	42313	No
2	2E	860466	923648	12	2	63182	No
3	3S	36965	68682	8	1	31717	No
3	3E	1002872	1038254	8	2	35382	No
4	4S	28706	93809	14	1	65103	No
4	4M1	155877	163724	3	2	7847	Yes
4	4M2	545987	614069	8	2	68082	Yes
4	4M3	935031	987447	7	2	52416	Yes
4	4E	1146672	1180226	6	1	33554	No
5	5S	20929	41403	6	3	20474	No
5	5E	1322400	1342964	5	3	20564	No
6	6S	653	52898	11	5	52245	No
6	6M	723117	742406	4	1	19289	Yes
6	6E	1313708	1382627	14	3	68919	No
7	7S	20307	77055	12	3	56748	No
7	7M	511950	610522	13	4	98572	Yes
7	7E	1382410	1426234	11	2	43824	No
8	8S	21361	57703	5	0	36342	No
8	8M	431165	466567	5	0	35402	Yes
8	8E	1383349	1443449	13	2	60100	No
9	9S	20080	78874	15	1	58794	No
9	9E	1474431	1503336	5	0	28905	No
10	10S	28490	58980	7	1	30490	No
10	10E	1591578	1649948	15	0	58370	No
11	11S	24160	86418	12	2	62258	No
11	11E	2006706	2035886	7	1	29180	No
12	12S	16973	56805	6	0	39832	No
12	12M1	764448	784830	4	3	20382	Yes
12	12M2	1694150	1730007	4	1	35857	Yes
12	12E	2188760	2248962	14	1	60202	No
13	13S	21364	66816	10	1	45452	No
13	13E	2854544	2892340	10	2	37796	No
14	14S	7208	28428	7	0	21220	No
14	14E	3266136	3287003	7	0	20867	No
			AVERAGE	8.94444	1.61111	44315.7
