# Supplementary material for: Three-dimensional modeling of theP. falciparumgenome during the erythrocytic cycle reveals a strong connection between genome architecture and gene expression
Source: HighWire-hosted journal article supplement (doi:10.1101/gr.169417.113), 2014-03-26
Supplement: Supplemental_Data.tar.gz [file geneCoordinates-expressionFoldChanges-SorbitolTreatedData.xls]

new_ID	chromosome	geneStart	geneEnd	strand	mid10KbWindow	geneAliasORfamily	geneAnnot	EarlyRingS	LateRingS	EarlyTrophozoiteS	LateTrophozoiteS	EarlySchizontS	LateSchizontS	Merozoite	Gametocyte	Sporozoite	TotalExpression	IsSexualGene
PF3D7_0100100	chr1	29510	37126	+	35000	VAR	erythrocyte+membrane+protein+1%2C+PfEMP1+%28VAR%29	57.1	28.3	33.4	19.2	42.1	20.1	37.1	62.1	122	421.4	0
PF3D7_0100200	chr1	38982	40207	-	35000	RIF	rifin+%28RIF%29	27.8	31.3	24.6	11.6	38	35.3	12.3	51.4	139	371.3	0
PF3D7_0100300	chr1	42367	46507	-	45000	PfEMP1	var-like+erythrocyte+membrane+protein+1	15.4	6.5	18.2	12.8	11.4	15	18.5	24.6	43.9	166.3	0
PF3D7_0100400	chr1	50363	51636	+	55000	RIF	rifin+%28RIF%29	13.6	21.2	27.4	0	36.3	27.1	14.6	56	12.2	208.4	0
PF3D7_0100600	chr1	53778	55006	-	55000	RIF	rifin+%28RIF%29	0	0	0	0	0	0	0	0	0	0	0
PF3D7_0100700	chr1	56690	56893	-	55000	PFA0035c	Plasmodium+exported+protein%2C+unknown+function%2C+fragment	0	0	0	0	0	0	0	0	0	0	0
PF3D7_0100800	chr1	59772	61003	+	65000	RIF	rifin+%28RIF%29	1.7	2.3	0	2.3	1.9	0	3.9	2.7	16.9	31.7	0
PF3D7_0100900	chr1	62187	63400	-	65000	RIF	rifin+%28RIF%29	0	0	0	0	0	0	10.2	1.2	3.1	14.5	0
PF3D7_0101000	chr1	65817	66989	-	65000	RIF	rifin+%28RIF%29	0.6	2.6	13.1	0	0	0.4	10.5	10.5	38	75.7	1
PF3D7_0101300	chr1	74563	75366	+	75000	MC-2TM	Pfmc-2TM+Maurer%27s+cleft+two+transmembrane+protein+%28MC-2TM%29	27.6	122.8	71.3	65.7	56	58.1	48.4	28.8	94.7	573.4	0
PF3D7_0101500	chr1	78241	79891	+	75000	MAL1P1.6	erythrocyte+membrane+protein+1+%28PfEMP1%29%2C+exon2%2C+pseudogene+%28var+%28pseudogene%29%29	16	9.4	33.4	18.7	14.2	33	62.9	28.9	175.7	392.2	0
PF3D7_0101600	chr1	81765	83106	-	85000	RIF	rifin+%28RIF%29	11.5	27.5	28.3	29.4	27.9	26.5	33.3	8.3	45.2	237.9	0
PF3D7_0101700	chr1	84791	86152	-	85000	MAL1P1.8	erythrocyte+membrane+protein+1+%28PfEMP1%29%2C+exon2%2C+pseudogene+%28var+pseudogene%29	1586.9	1243.8	1478.1	1934	2181.2	2020.6	2217.5	1663.5	3311.5	17637.1	0
PF3D7_0101800	chr1	87203	88177	-	85000	23510593	stevor	30.3	36.5	28.8	30.3	100.4	33.2	46.6	51.5	147.9	505.5	0
PF3D7_0101900	chr1	90242	91420	-	95000	RIF	rifin+%28RIF%29	2.7	6.9	1.9	0	0	0	27.8	0.5	34.7	74.5	0
PF3D7_0102000	chr1	93113	93875	-	95000	PFA0100c	Plasmodium+exported+protein+%28PHISTa%29%2C+unknown+function%2C+pseudogene	7	6.6	23.3	0	14.2	0	13.5	0	12.8	77.4	0
PF3D7_0102100	chr1	95050	95899	+	95000	PFA0105w	stevor%2C+pseudogene	0	5.8	0	1.2	2.5	6.1	107.8	5.7	14.2	143.3	0
PF3D7_0102200	chr1	98819	102282	+	105000	PTEX	ring-infected+erythrocyte+surface+antigen+%28RESA%29	1472.9	294.2	101.3	34.1	357.3	1013.1	2941.9	54.3	3.4	6272.5	0
PF3D7_0102500	chr1	110750	115799	-	115000	EBA181	erythrocyte+binding+antigen-181+%28EBA181%29	16.7	0.7	0	0	108.4	143.7	24.8	12.3	25.1	331.7	0
PF3D7_0102600	chr1	119041	121249	-	125000	FIKK1	serine%2Fthreonine+protein+kinase%2C+FIKK+family+%28FIKK1%29	2.9	0	18.5	0	0	0	11.9	3.1	10.1	46.5	0
PF3D7_0102700	chr1	124517	125484	+	125000	23510602	merozoite-associated+tryptophan-rich+antigen%2C+putative	12.2	29.5	16.3	8	25.2	55.2	222.8	34.3	77.1	480.6	0
PF3D7_0102800	chr1	126318	128141	-	125000	PFA0140c	conserved+Plasmodium+protein%2C+unknown+function	3.3	1.9	22.9	43.6	33.9	0	7.9	16.3	12.6	142.4	0
PF3D7_0102900	chr1	128960	130840	-	125000	23510604	aspartyl-tRNA+synthetase	392.2	336.3	708.4	375.6	203.9	138.7	43.3	361	21.4	2580.8	0
PF3D7_0103000	chr1	132086	133624	-	135000	PFA0150c	conserved+Plasmodium+protein%2C+unknown+function	11.6	3.4	0	1.5	3.2	25.9	8.7	19.8	15.4	89.5	0
PF3D7_0103100	chr1	134353	139257	-	135000	23510606	conserved+Plasmodium+protein%2C+unknown+function	0	0	17.8	22.8	29.9	1.9	0.3	55.7	0	128.4	0
PF3D7_0103200	chr1	140662	142219	-	145000	PPM	nucleoside+transporter%2C+putative	464.5	472.5	1316.1	896.5	705	291.3	15.6	433.1	141.4	4736	0
PF3D7_0103300	chr1	143640	146396	-	145000	PFA0165c	conserved+Plasmodium+protein%2C+unknown+function	29.2	29.3	45.2	23.3	54.3	19.9	5.6	62.2	49.6	318.6	0
PF3D7_0103400	chr1	147915	152777	-	155000	PFA0170c	zinc-carboxypeptidase%2C+putative	58	130.3	339.8	243.1	251.6	265.5	15	1362.3	285.4	2951	0
PF3D7_0103500	chr1	154176	160426	+	155000	PFA0175w	conserved+Plasmodium+protein%2C+unknown+function	0	0	0	12	0	0	0	0	0	12	0
PF3D7_0103600	chr1	161131	166229	+	165000	PFA0180w	ATP-dependent+RNA+helicase%2C+putative	38.5	44.9	140.6	118.2	64.3	22.8	0	162.3	65.8	657.4	0
PF3D7_0103700	chr1	166513	168687	+	165000	PFA0185w	conserved+Plasmodium+protein%2C+unknown+function	200.6	235	321	267.9	225.4	94.7	41.4	259.7	343.9	1989.6	0
PF3D7_0103800	chr1	169079	171273	-	175000	ARP1	actin-related+protein+%28ARP1%29	15.8	19.2	21.7	58.4	136.3	80.5	25.4	791.3	86.4	1235	1
PF3D7_0103900	chr1	172864	174591	+	175000	PIEPS15	parasite-infected+erythrocyte+surface+protein+%28PIEPS15%29	13.9	18.7	105.6	80.1	71.5	15.9	2.3	303.4	12.8	624.2	0
PF3D7_0104000	chr1	175609	176376	+	175000	TRSP	thrombospondin-related+sporozoite+protein+%28TRSP%29	0	0	0	3.4	0	8.4	0	21	1433.7	1466.5	1
PF3D7_0104100	chr1	178087	180790	+	175000	23510616	conserved+Plasmodium+membrane+protein%2C+unknown+function	0	0	0	15.1	31.5	9.4	0	84	380.8	520.8	1
PF3D7_0104200	chr1	182822	184222	-	185000	23510617	conserved+Plasmodium+protein%2C+unknown+function	136.9	153.7	381.4	383.8	527.5	758.8	1156	133.2	396.9	4028.2	0
PF3D7_0104300	chr1	190269	201230	+	195000	PCNA_UB	ubiquitin+carboxyl-terminal+hydrolase%2C+putative	140.4	80.5	96.3	64.6	92.6	183.7	233.2	8.4	60.9	960.6	0
PF3D7_0104400	chr1	202536	204143	+	205000	LytB	4-hydroxy-3-methylbut-2-enyl+diphosphate+reductase+%28LytB%29	32.8	117	306	325.7	325	231.8	74.7	708.5	213.6	2335.1	0
PF3D7_0104500	chr1	204622	205389	-	205000	23510621	conserved+Plasmodium+protein%2C+unknown+function	141.9	137.3	270.9	171.9	101.4	30.6	13.8	141.9	44.1	1053.8	0
PF3D7_0104600	chr1	206170	210189	+	205000	PFA0235w	conserved+Plasmodium+protein%2C+unknown+function	3.1	8.3	13.1	11	22	0	4.1	9.3	0	70.9	0
PF3D7_0104700	chr1	210870	213005	+	215000	PFA0240w	transporter%2C+putative	0.5	7.2	4.6	8.3	0	9.3	17.3	81	38.5	166.7	0
PF3D7_0104800	chr1	215776	217509	+	215000	NPT1	novel+putative+transporter+1%3Bwith%3DGeneDB%3APBANKA_020830+%28NPT1%29	12.3	0.4	17.5	34.3	58.1	28.8	33.6	20.8	35.5	241.3	0
PF3D7_0105100	chr1	221202	221633	+	225000	23510625	conserved+Plasmodium+protein%2C+unknown+function	0	0	4.9	25.8	15.2	0	0	20.2	0	66.1	0
PF3D7_0105200	chr1	222254	223960	-	225000	23510626	conserved+Plasmodium+protein%2C+unknown+function	16	60.1	174.1	94.6	82.8	47	0.6	114.5	79.2	668.9	0
PF3D7_0105300	chr1	225110	225779	-	225000	C-CAP	cyclase-associated+protein%2C+putative+%28C-CAP%29	6.2	0	27.6	45.2	148.6	99.2	3.3	107.9	34.8	472.8	0
PF3D7_0105400.1	chr1	226681	227285	-	225000	23510628	conserved+Plasmodium+protein%2C+unknown+function	0.7	4.8	15	60.7	355.5	324.7	22.2	57.1	47.7	888.4	0
PF3D7_0105500	chr1	228485	229519	-	225000	23510629	conserved+Plasmodium+protein%2C+unknown+function	0	0	1.3	0.2	0	0	0	0	3.1	4.6	0
PF3D7_0105600	chr1	230289	234402	-	235000	23510630	conserved+Plasmodium+protein%2C+unknown+function	29.3	25	62.2	52.3	55.9	45.6	10.3	43.1	142.4	466.1	0
PF3D7_0105700	chr1	238666	247857	+	245000	23510631	asparagine-rich+antigen+Pfa35-2	1.1	0	11.2	5.4	19.2	0	0	75.5	31.1	143.5	0
PF3D7_0105800	chr1	249231	252010	-	255000	23510632	conserved+Plasmodium+protein%2C+unknown+function	0.7	10.4	144.4	205	307.4	187.6	5	208.1	158.8	1227.4	0
PF3D7_0105900	chr1	253584	254930	+	255000	DNAgenes	DNA+binding+protein%2C+putative	13	2.8	50.7	54.3	69.3	76.6	0	281.3	44.6	592.6	0
PF3D7_0106000	chr1	255775	258543	-	255000	PFA0295c	conserved+Plasmodium+protein%2C+unknown+function	14.7	10.9	73	128.8	251.5	227.9	11.5	155.2	251.8	1125.3	0
PF3D7_0106100	chr1	260658	261809	-	265000	PPM	vacuolar+ATP+synthase+subunit+c%2C+putative	97.3	96.9	194.3	173.5	176.1	86.7	0.8	53	87.2	965.8	0
PF3D7_0106200	chr1	263340	264223	-	265000	PFA0305c	conserved+Plasmodium+protein%2C+unknown+function	0	0	0	22.1	49.5	15.9	0	37.2	11.8	136.5	0
PF3D7_0106300	chr1	265208	269173	-	265000	ATP6	calcium-transporting+ATPase+%28ATP6%29	370.2	339	845.7	1003.1	1070	479.1	279.7	320.7	524	5231.5	0
PF3D7_0106400	chr1	272454	273404	+	275000	23510638	conserved+Plasmodium+protein%2C+unknown+function	282.9	208.5	339.4	177.3	86.3	48	63.4	151.9	82	1439.7	0
PF3D7_0106500	chr1	274315	278550	+	275000	PFA0320w	conserved+Plasmodium+protein%2C+unknown+function	0	0	9.3	23.5	34.6	26.8	6.6	42.8	5	148.6	0
PF3D7_0106600	chr1	279115	280014	+	275000	23510640	conserved+Plasmodium+protein%2C+unknown+function	1.6	7.2	11.2	0	24.9	0	11.5	0	45.5	101.9	0
PF3D7_0106700	chr1	281155	285459	+	285000	AARP2	small+ribosomal+subunit+assembling+AARP2+protein+%28AARP2%29	331	174.9	199.2	112.2	133.5	73.5	46.8	119.9	90.8	1281.8	0
PF3D7_0106800	chr1	286951	288918	+	285000	RAB5c	Rab+GTPase+5c+%28RAB5c%29	0	3.6	54.8	56.4	72.7	34.6	0	60.3	9.8	292.2	0
PF3D7_0106900	chr1	290386	292590	+	295000	IspD	2-C-methyl-D-erythritol+4-phosphate+cytidylyltransferase%2C+putative+%28IspD%29	0	5	9.9	24.7	36	12.5	0	56.8	0	144.9	0
PF3D7_0107000	chr1	293642	294968	+	295000	CEN1	centrin-1+%28CEN1%29	6.6	0	60.3	99.4	157.9	28.7	17.2	319.9	47.7	737.7	0
PF3D7_0107100	chr1	295300	296931	-	295000	23510645	conserved+Plasmodium+protein%2C+unknown+function	0	16.9	98.4	76.4	46.8	11.4	1.4	54	228.2	533.5	0
PF3D7_0107200	chr1	297362	299397	+	295000	CCR4	carbon+catabolite+repressor+protein+4%2C+putative	4.9	15.1	52.8	42.3	27.9	18.4	11	21.1	18.9	212.4	0
PF3D7_0107300	chr1	299562	300868	-	305000	23510647	probable+protein%2C+unknown+function	5	14.4	22.1	12.1	7	28.6	15.1	412.2	690.5	1207	1
PF3D7_0107400	chr1	302937	303398	+	305000	23510649	conserved+Plasmodium+protein%2C+unknown+function	0	0	18.5	10.6	14.7	60	3.5	168	23.8	299.1	0
PF3D7_0107500	chr1	304362	309257	-	305000	23510650	lipid%2Fsterol%3AH++symporter	1318.3	1042	1656.4	1105.5	942.2	1167	2881	293.8	1958.6	12364.8	0
PF3D7_0107600	chr1	314618	319405	+	315000	PFA0380w	serine%2Fthreonine+protein+kinase%2C+putative	0	3.9	0	1	0	0	5.1	34.9	626.1	671	1
PF3D7_0107700	chr1	320168	321508	+	325000	PFA0385w	conserved+Plasmodium+membrane+protein%2C+unknown+function	0	0	3.1	3.8	0	0	0	8.9	14.1	29.9	0
PF3D7_0107800	chr1	322371	326072	+	325000	DNAgenes	DNA+repair+exonuclease+Mre11%2C+putative	11.7	0	15	1.1	14.1	0.5	7.2	45.1	22.8	117.5	0
PF3D7_0107900	chr1	326397	327224	-	325000	PFA0395c	conserved+Plasmodium+protein%2C+unknown+function	7.7	2.6	17.3	21.1	14.1	7.1	0	5.4	0	75.3	0
PF3D7_0108000	chr1	328431	329304	-	325000	23510655	beta3+proteasome+subunit%2C+putative	105.6	148.8	280	271.4	318.8	86.9	0	196.9	125.9	1534.3	0
PF3D7_0108100	chr1	330738	332708	+	335000	23510656	conserved+Plasmodium+protein%2C+unknown+function	0	1	22	23.3	23.5	12.2	0	102.3	3.5	187.8	0
PF3D7_0108300	chr1	337168	343833	+	345000	PFA0410w	conserved+Plasmodium+protein%2C+unknown+function	480.8	250.9	577.7	261.7	279.3	162.1	171.7	281.4	331.2	2796.8	0
PF3D7_0108400.1	chr1	344400	346540	-	345000	PFA0415c	mitochondrial+carrier+protein%2C+putative	101.3	71.6	110.5	144.8	116.4	83.7	592.3	232	91.9	1544.5	0
PF3D7_0108500	chr1	349170	349709	+	345000	23510659	conserved+Plasmodium+protein%2C+unknown+function	6041	2242	1218.4	490.4	873.8	3429.4	15622.1	683.5	312.1	30912.7	0
PF3D7_0108600	chr1	349995	351626	-	355000	PFA0425c	conserved+Plasmodium+protein%2C+unknown+function	25.6	21.6	64.7	85.4	134.9	40.1	240.9	443.4	32.8	1089.4	0
PF3D7_0108700	chr1	352314	356211	-	355000	PSOP24	secreted+ookinete+protein%2C+putative+%28PSOP24%29	43.4	38.6	65.5	70.2	100.5	18.8	0	79.2	215.2	631.4	0
PF3D7_0108800	chr1	357834	360339	+	355000	23510662	conserved+Plasmodium+protein%2C+unknown+function	105.1	118	207.3	221.7	185.3	94.3	17.2	322	119.4	1390.3	0
PF3D7_0109000	chr1	363318	363992	+	365000	23510663	photosensitized+INA-labeled+protein+1%2C+PhIL1%2C+putative	4.9	5.5	0	0	68.7	68.5	1.7	1022.9	66.2	1238.4	0
PF3D7_0109100	chr1	365610	368795	+	365000	CCp5	LCCL+domain-containing+protein+%28CCp5%29	5.9	0	0	12.3	41.4	123.3	3	917.1	198.6	1301.6	0
PF3D7_0109200	chr1	369480	370178	-	365000	23510665	mRNA+cleavage+factor-like+protein%2C+putative	20.3	30.4	53.5	49.2	41.3	30.3	0	52.5	9.3	286.8	0
PF3D7_0109300	chr1	371815	373012	-	375000	23510666	fatty+acid+elongation+protein%2C+GNS1%2FSUR4+family%2C+putative	7.1	7.9	32	58.4	42.6	12.1	0.5	403.9	13.1	577.6	0
PF3D7_0109400	chr1	374439	375087	-	375000	tubulin	tubulin-specific+chaperone+a%2C+putative	12.1	31.8	78.7	76.6	72.9	27	0	330	92	721.1	0
PF3D7_0109500	chr1	376294	377004	-	375000	Histone	N-acetyltransferase%2C+putative	10.2	0	10.1	0	11.1	10.2	12.6	40.5	5.3	100	0
PF3D7_0109600	chr1	377874	378599	-	375000	23510669	cold-shock+protein%2C+putative	30.5	48.3	95.9	74.8	49.5	11.1	9.5	66.3	26.1	412	0
PF3D7_0109700	chr1	379149	379806	-	375000	PFA0475c	conserved+protein%2C+unknown+function	59.9	19.9	66.9	29.5	18.9	10.8	0	44.5	0	250.4	0
PF3D7_0109800	chr1	380697	382424	+	385000	23510671	phenylalanyl-tRNA+synthetase%2C+putative	107.2	40.1	55	48.5	41.6	4.6	4.8	28.4	10.4	340.6	0
PF3D7_0109900.1	chr1	383284	387940	+	385000	PFA0485w	phosphatidate+cytidylyltransferase%2C+putative	54.6	102	207.3	292.9	329.1	201.5	34.1	325.7	44.1	1591.3	0
PF3D7_0110000	chr1	388372	389076	+	385000	23510673	conserved+Plasmodium+protein%2C+unknown+function	26.2	58.5	130.6	96.3	98.7	34.3	1.7	2105.4	48	2599.7	0
PF3D7_0110100	chr1	389261	392065	-	395000	23510674	selenocysteine-specific+elongation+factor+selB+homologue%2C+putative	17.1	11.5	29.7	27.6	18.1	0	0	31.5	21.6	157.1	0
PF3D7_0110200	chr1	392604	393035	+	395000	23510675	human+hepatopoietin-like+protein%2C+putative	47.4	69.6	150.6	91.7	91.8	36.2	12.2	97.4	136.3	733.2	0
PF3D7_0110400	chr1	393875	394835	-	395000	23510676	DNA-directed+RNA+polymerase+2%2C+putative	343.3	181.5	326.3	222.4	197.5	105.3	60.6	222.3	54.5	1713.7	0
PF3D7_0110500	chr1	396591	403606	+	405000	23510677	bromodomain+protein%2C+putative	15.9	13	74.3	36.1	36.8	0	0	37.9	2	216	0
PF3D7_0110600	chr1	405739	412169	+	405000	PIP5K	phosphatidylinositol-4-phosphate+5-kinase+%28PIP5K%29	117.3	79.8	123.3	109.5	123.5	84.7	59.3	148.7	195.3	1041.4	0
PF3D7_0110700	chr1	413760	415100	-	415000	23510679	chromatin+assembly+factor+1+protein+WD40+domain%2C+putative	29.5	65.6	569.1	374.7	283.9	115	11.2	297.4	150.1	1896.5	0
PF3D7_0110800	chr1	417921	419607	+	415000	23510680	transcription+initiation+factor+TFIIB%2C+putative	144.4	177	330.8	214.7	230.8	132.5	77.7	175	244.1	1727	0
PF3D7_0110900	chr1	420293	420853	-	425000	23510681	adenylate+kinase%2C+putative	17.9	47	156.3	117.6	125.8	28.2	16.2	97.2	29.4	635.6	0
PF3D7_0111000	chr1	421776	427575	-	425000	PFA0535c	kinesin%2C+putative	0	0	3.4	0	39.8	2	5.2	37.5	6.4	94.3	0
PF3D7_0111200	chr1	430152	430858	-	435000	23510683	conserved+Plasmodium+protein%2C+unknown+function	0	0	0	0	0	0	0	0	186.9	186.9	0
PF3D7_0111300	chr1	431539	435042	-	435000	23510684	replication+factor+c+protein%2C+putative	0	5.1	38.8	45.8	85.2	0	0	49.2	0	224.1	0
PF3D7_0111400	chr1	436408	438564	+	435000	GEXP19	conserved+Plasmodium+protein%2C+unknown+function+%28GEXP19%29	0	0	0	0	15	0	0	14.8	4.9	34.7	0
PF3D7_0111500	chr1	439652	441418	-	445000	23510686	UMP-CMP+kinase%2C+putative	0	0	84	78	146.6	104.3	5.5	9.7	0.7	428.8	0
PF3D7_0111600	chr1	442543	443289	-	445000	23510687	conserved+Plasmodium+protein%2C+unknown+function	6.4	4	32.1	0	0	0	0	0	0	42.5	0
PF3D7_0111700	chr1	443585	443938	-	445000	23510688	conserved+Plasmodium+protein%2C+unknown+function	12.7	7	36.1	16	8.1	4.3	0	0	0	84.2	0
PF3D7_0111800	chr1	446026	448849	+	445000	PFA0570w	conserved+Plasmodium+protein%2C+unknown+function	41.1	112.6	192.5	164.7	148.1	33.9	4.1	149.7	30.5	877.2	0
PF3D7_0111900	chr1	450043	450646	-	455000	23477009	conserved+Plasmodium+protein%2C+unknown+function	21	38.1	103.4	101.5	123.5	62	10.4	55.6	27.3	542.8	0
PF3D7_0112000	chr1	450831	453118	-	455000	PFA0580c	TatD-like+deoxyribonuclease%2C+putative	7.9	1.5	11.8	26.6	1	11.6	0	0	0	60.4	0
PF3D7_0112100	chr1	454847	455338	+	455000	6594245	conserved+Plasmodium+protein%2C+unknown+function	0	0	0	0	0	0	0	0	0	0	0
PF3D7_0112200	chr1	464726	470194	+	465000	PPM	multidrug+resistance-associated+protein+1+%28MRP1%29	4.7	2.2	26.9	11.4	10.8	0	0	0	0	56	0
PF3D7_0112800	chr1	481809	482618	-	485000	6594247	Plasmodium+exported+protein+%28hyp11%29%2C+unknown+function	0	0	0	0	0	4.4	0	34.1	1.9	40.4	0
PF3D7_0112900	chr1	486500	487186	+	485000	6594248	Plasmodium+exported+protein%2C+unknown+function	0	0	0	6.8	12.1	84.3	22.2	0	0	125.4	0
PF3D7_0113000	chr1	487892	490127	-	485000	GARP	glutamic+acid-rich+protein+%28GARP%29	874.1	422.5	510.4	314.9	162.6	66.7	1.8	6.6	2.2	2361.8	0
PF3D7_0113100	chr1	495244	500076	+	495000	6594250	surface-associated+interspersed+gene+1.1+%28SURFIN+1.1%29+%28SURF1.1%29	0	0	0	0	0	0	0	0	13.2	13.2	0
PF3D7_0113200	chr1	500959	502868	-	505000	PFA0630c	Plasmodium+exported+protein%2C+unknown+function	43.2	261.6	291.8	163.9	123.8	88	0	54.8	0.1	1027.2	0
PF3D7_0113300	chr1	504938	506874	-	505000	6594252	Plasmodium+exported+protein+%28hyp1%29%2C+unknown+function	404	129.2	79.5	38.6	28.1	83.9	100.7	12.9	7.2	884.1	0
PF3D7_0113400	chr1	508252	509748	-	505000	6594253	Plasmodium+exported+protein%2C+unknown+function	6.3	27.8	25.1	7.1	8.3	3.1	5.6	3.6	11.8	98.7	0
PF3D7_0113600	chr1	512086	517855	+	515000	PFA0655	surface-associated+interspersed+gene+%28SURFIN%29%2C+pseudogene+%28SURF1.2%29	6	0.5	0	0	19.4	0	5.7	16.5	41.4	89.5	0
PF3D7_0113700	chr1	520807	522579	+	525000	HSP40	heat+shock+protein+40%2C+type+II+%28HSP40%29	54.8	12.1	3.7	0.4	18.4	10.1	60.4	1.8	8.1	169.8	0
PF3D7_0113800	chr1	527107	536351	+	535000	23476992	DBL+containing+protein%2C+unknown+function	0	0	0	0	0.1	0	0.8	3.6	8.2	12.7	0
PF3D7_0113900	chr1	537109	538025	-	535000	GEXP10	Plasmodium+exported+protein+%28hyp8%29%2C+unknown+function+%28GEXP10%29	706.9	151.3	81.3	33.5	43.9	64.9	73.7	293	30.2	1478.7	0
PF3D7_0114000	chr1	542480	546983	+	545000	GEXP06	RESA-like+protein+with+DnaJ+domain%2C+putative+%28GEXP06%29	0	0	0	0	0	0	0	22.3	0	22.3	0
PF3D7_0114100	chr1	547597	548380	-	545000	MC-2TM	Pfmc-2TM+Maurer%27s+cleft+two+transmembrane+protein+%28MC-2TM%29	41.9	243.9	233.1	98.2	49.3	41.9	62.1	206.3	284.3	1261	0
PF3D7_0114200	chr1	550576	551713	-	555000	MCprot	Plasmodium+exported+protein+%28hyp4%29%2C+unknown+function	8.6	6	11.4	5.7	8.6	5.4	9.6	2.9	28.6	86.8	0
PF3D7_0114300	chr1	552640	553797	+	555000	PFA0690w	Plasmodium+exported+protein%2C+unknown+function%2C+pseudogene	0	0.2	0	6.6	26.1	14.3	5.7	4.9	34.8	92.6	0
PF3D7_0114400	chr1	554057	555439	-	555000	PFA0695c	erythrocyte+membrane+protein+1+%28PfEMP1%29%2C+exon2%2C+pseudogene	0	0	0	0	0	0	0	0	0	0	0
PF3D7_0114500	chr1	558201	558708	-	555000	23476997	Plasmodium+exported+protein+%28hyp10%29%2C+unknown+function	114.4	192.7	120.5	48.1	12.2	36.1	53.8	62.3	212.6	852.7	0
PF3D7_0114600	chr1	560474	561534	-	565000	PFA0705c	stevor%2C+pseudogene	0.4	0	6.2	0.3	0	0	1.4	2.2	6.2	16.7	0
PF3D7_0114700	chr1	563703	564842	-	565000	23476998	rifin	19.4	12.2	16	10.4	8.6	20.1	19.3	11.2	107.2	224.4	0
PF3D7_0114800	chr1	569485	570272	-	565000	23476999	Plasmodium+exported+protein+%28hyp7%29%2C+unknown+function	0	9.2	3.8	0	1.2	12.7	7.2	16.7	17.5	68.3	0
PF3D7_0114900	chr1	572135	572853	-	575000	PFA0720w	Plasmodium+exported+protein%2C+unknown+function%2C+pseudogene	2.5	19	10	20.4	9.6	4.4	4.3	38.1	50.2	158.5	0
PF3D7_0115000	chr1	577704	583789	+	585000	SURF1.3	surface-associated+interspersed+protein+1.3+%28SURFIN+1.3%29+%28SURF1.3%29	6.3	0	0	0	0	0	3.4	0	12.9	22.6	0
PF3D7_0115200	chr1	591849	593187	+	595000	RIF	rifin+%28RIF%29	0	11	12.1	0	4.3	7.8	2.2	8.5	29.5	75.4	0
PF3D7_0115300	chr1	595102	596273	+	595000	RIF	rifin+%28RIF%29	1630.9	1261.5	1493.4	1950.8	2207.7	2035.5	2247	1705.1	3325.4	17857.3	0
PF3D7_0115400	chr1	598465	599472	+	595000	stevor	stevor+%28stevor%29	45.9	43.1	45.2	35.4	12	53.5	44.8	37.6	84.9	402.4	0
PF3D7_0115500	chr1	600692	601992	+	605000	PFA0755w	erythrocyte+membrane+protein+1+%28PfEMP1%29%2C+pseudogene	6.4	0	13	2.5	0	0	4.8	59.7	14.9	101.3	0
PF3D7_0115600	chr1	604162	605531	+	605000	RIF	rifin+%28RIF%29	27.8	227.2	137.4	59.7	21.2	20.8	28.3	49.2	165.2	736.8	0
PF3D7_0115700	chr1	607390	614893	-	615000	VAR	erythrocyte+membrane+protein+1%2C+PfEMP1+%28VAR%29	18.2	14.2	9.4	0	12.6	2.1	22.8	15.1	45.8	140.2	0
PF3D7_0200100	chr2	25232	31168	+	25000	VAR	erythrocyte+membrane+protein+1%2C+PfEMP1+%28VAR%29	25.2	3.2	14.6	16.6	13.8	10.4	25.8	16.7	17.1	143.4	0
PF3D7_0200200	chr2	33030	34259	-	35000	RIF	rifin+%28RIF%29	18.1	12.6	9.4	16.4	40.7	39	38.3	22.6	83.9	281	1
PF3D7_0200300	chr2	35927	37249	-	35000	812599	erythrocyte+membrane+protein+1+%28PfEMP1%29%2C+exon2	19.2	3.7	0	0	0	0.7	10.2	0	13.8	47.6	0
PF3D7_0200400	chr2	38287	39303	-	35000	812600	stevor	25.6	49.2	52.5	33.3	24	18	60	19.9	59.2	341.7	0
PF3D7_0200500	chr2	41515	42858	-	45000	RIF	rifin+%28RIF%29	0	0	0	0	0	0	7.6	0	35.2	42.8	0
PF3D7_0200600	chr2	45286	46558	-	45000	RIF	rifin+%28RIF%29	30.7	4.7	7.1	7.3	7.5	4.9	4.4	15.9	75.2	157.7	1
PF3D7_0200700	chr2	48923	50147	-	45000	RIF	rifin+%28RIF%29	16.8	15.4	11.2	14.4	0.4	7.4	6.9	15.4	72.6	160.5	0
PF3D7_0200800	chr2	51842	53124	-	55000	812604	erythrocyte+membrane+protein+1+%28PfEMP1%29%2C+truncated	1605	1234.1	1464.2	1934.3	2178.9	2032.8	2236.4	1658.1	3270.6	17614.4	0
PF3D7_0200900	chr2	54254	55255	-	55000	812605	stevor%2C+pseudogene	5.1	13.3	17.1	10.6	14.1	0.4	19.6	16	34.1	130.3	0
PF3D7_0201000	chr2	57344	58421	-	55000	RIF	rifin+%28RIF%29	4.1	4	2.5	0	0	6.5	10.7	7.4	44.8	80	0
PF3D7_0201100	chr2	60107	60319	-	65000	812607	Plasmodium+exported+protein%2C+unknown+function%2C+fragment	0	0	0	0	0	0	0	11.6	0	11.6	0
PF3D7_0201200	chr2	63157	64376	+	65000	RIF	rifin+%28RIF%29	0	4.5	8	10.9	0	0	5.8	5.4	16.1	50.7	0
PF3D7_0201300	chr2	66529	67545	+	65000	812609	stevor	24.5	93	57.9	64.6	49	80.1	78.3	46.6	104.8	598.8	0
PF3D7_0201400	chr2	69088	69771	+	65000	812610	Plasmodium+exported+protein+%28hyp10%29%2C+unknown+function	0	0	0	0	0	0	0	4.8	0	4.8	0
PF3D7_0201500	chr2	73441	74396	-	75000	812611	Plasmodium+exported+protein+%28hyp9%29%2C+unknown+function	58.1	127.9	198.7	140.5	115.1	52.6	16.2	22.8	59.1	791	0
PF3D7_0201600	chr2	77251	78808	-	75000	812612	Plasmodium+exported+protein+%28PHISTb%29%2C+unknown+function	472	350.2	231.5	86.4	65.4	18.9	22.3	0	56.9	1303.6	0
PF3D7_0201700	chr2	81291	84165	-	85000	812613	DnaJ+protein%2C+putative	484.4	67	15.5	0	10.3	77.9	146.7	1.8	85.3	888.9	0
PF3D7_0201800	chr2	86832	88791	-	85000	812614	RESA-like+protein+with+PHIST+and+DnaJ+domains	423.4	292.7	243.8	69.2	38.2	82.7	76.5	0	7.3	1233.8	0
PF3D7_0201900	chr2	91318	98838	-	95000	EMP3	erythrocyte+membrane+protein+3+%28EMP3%29	1256.5	445.5	1023.4	268.6	331.7	70	9.7	0	79.3	3484.7	0
PF3D7_0202000	chr2	103385	105796	-	105000	PTEX	knob-associated+histidine-rich+protein+%28KAHRP%29	6649.7	2801	2940.5	1245.6	886	670	54.2	29.6	88.8	15365.4	0
PF3D7_0202100	chr2	109564	110580	-	115000	812617	Plasmodium+exported+protein+%28PHISTc%29%2C+unknown+function	536.8	90	52.9	31.8	275.8	961.7	2771.7	8.9	6534.8	11264.4	0
PF3D7_0202200	chr2	112547	113682	-	115000	812618	Plasmodium+exported+protein%2C+unknown+function	173.6	28.7	29.5	10.5	18.3	70.4	483.2	2.1	36.4	852.7	0
PF3D7_0202300	chr2	117225	118235	+	115000	812619	Plasmodium+exported+protein+%28hyp11%29%2C+unknown+function	0	0	0	0	0	0	0	0	0	0	0
PF3D7_0202400	chr2	120524	124102	+	125000	812620	conserved+Plasmodium+protein%2C+unknown+function	62.2	95.3	161.3	35.5	37.7	16.5	0	0	6.6	415.1	0
PF3D7_0202500	chr2	127994	128314	+	125000	812621	early+transcribed+membrane+protein+2+%28ETRAMP2%29	15605.2	11470.5	6685.9	1962.7	7222.7	18549.7	22198.2	878.8	784.7	85358.4	0
PF3D7_0202600.1	chr2	129342	133563	-	135000	812622	conserved+Plasmodium+protein%2C+unknown+function	16.8	13.9	19.9	18.4	30.2	14.7	28.4	110.1	10.9	263.3	0
PF3D7_0202700	chr2	135523	137139	+	135000	OPP	octaprenyl+pyrophosphate+synthase+%28OPP%29	1.5	42.7	128.1	142.7	130.1	40.5	13.4	89.8	55.4	644.2	0
PF3D7_0202900	chr2	139324	141192	+	145000	812624	zinc+finger+protein%2C+putative	0	0	18.1	37.3	60.8	17	0	14.2	10.3	157.7	0
PF3D7_0203000	chr2	141625	147564	-	145000	812625	conserved+Plasmodium+protein%2C+unknown+function	0	0	0	0	0	3.3	0	1.9	1.9	7.1	0
PF3D7_0203200	chr2	158137	159660	-	155000	C6S3A8	conserved+Plasmodium+protein%2C+unknown+function	0	1.2	12.5	16	59.9	43.6	0	254.7	118.4	506.3	0
PF3D7_0203300	chr2	160514	161242	+	165000	812627	ERCC1+nucleotide+excision+repair+protein%2C+putative	13.9	10.1	69.2	140.5	120	62.7	0	157	20.2	593.6	0
PF3D7_0203400	chr2	162065	162900	-	165000	812628	conserved+Plasmodium+protein%2C+unknown+function	1.6	12.2	76.3	159.4	160.6	22.9	0	269.2	119	821.2	0
PF3D7_0203600	chr2	166144	168051	+	165000	812629	conserved+Plasmodium+protein%2C+unknown+function	0	0	0.8	0	8.6	0	0	0	0.4	9.8	0
PF3D7_0203700	chr2	168682	170136	-	165000	812630	nucleolar+preribosomal+assembly+protein%2C+putative	304.2	160.9	231.3	71.9	48.1	44.1	87.5	447.2	97.9	1493.1	0
PF3D7_0203800	chr2	171563	174912	-	175000	812632	conserved+Plasmodium+protein%2C+unknown+function	0	0	11.1	8.8	14.1	0.5	0	1743.8	50	1828.3	1
PF3D7_0203900	chr2	176567	178300	+	175000	643632	5%27-3%27+exonuclease%2C+N-terminal+resolvase-like+domain%2C+putative	2.5	14.6	40.8	38.3	30.1	7.4	0	20.1	0.9	154.7	0
PF3D7_0204000	chr2	178955	181526	+	185000	812634	conserved+Plasmodium+protein%2C+unknown+function	4.8	11.5	35.3	43	40	13.6	5.7	66.2	39.3	259.4	0
PF3D7_0204100	chr2	182228	189115	-	185000	812635	conserved+Plasmodium+protein%2C+unknown+function	0	0	0	0	0	0	0	2.1	0	2.1	0
PF3D7_0204200	chr2	192818	194199	+	195000	812636	conserved+Plasmodium+protein%2C+unknown+function	138.4	102.1	161.7	135.2	181.4	307	24.4	122.8	11.1	1184.1	0
PF3D7_0204300	chr2	194826	196916	-	195000	812637	conserved+Plasmodium+protein%2C+unknown+function	4.2	0	0.7	0	3.8	0	0	0	0	8.7	0
PF3D7_0204500	chr2	198353	199570	-	195000	3K7Y	aspartate+aminotransferase%2Caspartate+transaminase+%28AspAT%29	70.7	37	74.6	53.3	43.5	22.9	0	15.1	32.5	349.6	0
PF3D7_0204600	chr2	200482	204048	-	205000	812639	conserved+Plasmodium+protein%2C+unknown+function	9.5	22.8	38.4	18.4	7.4	5.7	2.8	9.1	9.2	123.3	0
PF3D7_0204700	chr2	205889	207403	-	205000	HT	hexose+transporter+%28HT%29	220.1	178.2	264	216.7	219.9	122.3	65.3	88.4	94	1468.9	0
PF3D7_0204800	chr2	209583	210833	-	215000	812641	3%27-5%27+exonuclease%2C+putative	0	7.8	39.3	18.6	19.8	7	0	59.8	14.2	166.5	0
PF3D7_0204900	chr2	211348	212627	+	215000	812642	ubiE%2FCOQ5+methyltransferase%2C+putative	4.9	1.2	5.2	0	0	6.9	7.7	17.3	1.2	44.4	0
PF3D7_0205000	chr2	212982	214508	-	215000	812643	conserved+Plasmodium+protein%2C+unknown+function	5.7	0	9.3	18.3	0	0	0	180.8	0	214.1	0
PF3D7_0205200	chr2	217882	218907	-	215000	PFB0230c	conserved+Plasmodium+protein%2C+unknown+function	5	0	5.7	0	6	0	7.9	31.1	0.4	56.1	0
PF3D7_0205300	chr2	219690	222256	+	225000	812645	conserved+Plasmodium+protein%2C+unknown+function	3.4	7.4	4.9	9.9	5.2	0.3	3.8	64.8	10.3	110	1
PF3D7_0205400	chr2	223478	224851	+	225000	812646	conserved+Plasmodium+protein%2C+unknown+function	12.3	0	17.7	4.9	0	0	4.2	13.4	0	52.5	0
PF3D7_0205500	chr2	225562	226245	-	225000	812647	DNA-directed+RNA+polymerase+II+16+kDa+subunit%2C+putative	234.6	112.7	249.9	181	163.5	76.3	33.3	309.4	8.8	1369.5	0
PF3D7_0205600	chr2	228025	229932	+	225000	812648	conserved+Plasmodium+protein%2C+unknown+function	46.7	75.6	216.1	178.1	219	119.6	84.8	210	172.2	1322.1	0
PF3D7_0205700.1	chr2	231141	232529	+	235000	812649	conserved+Plasmodium+protein%2C+unknown+function	332.9	143	100	99.1	84.6	84.8	107.2	246.2	35.5	1233.3	0
PF3D7_0205900	chr2	235237	238816	+	235000	812651	proteasome+26S+regulatory+subunit%2C+putative	216	274.6	715.1	602.6	669.6	386.9	11.8	930.8	306	4113.4	0
PF3D7_0206000	chr2	239246	243796	-	245000	812652	DNA+repair+endonuclease%2C+putative	207.3	169.7	234.7	185.8	198.6	272.4	52.3	221.8	110.4	1653	0
PF3D7_0206100	chr2	245358	246699	+	245000	SufE	iron-sulfur+assembly+protein%2C+putative+%28SufE%29	112.9	120	181.9	105.4	76	63.9	24.7	29.4	92.3	806.5	0
PF3D7_0206200	chr2	249030	250727	+	245000	PPM	metabolite%2Fdrug+transporter%2C+putative	80.7	36.3	61	73.3	366.7	512.6	95.2	325.6	2856.2	4407.6	0
PF3D7_0206300	chr2	252394	254818	+	255000	812655	conserved+Plasmodium+protein%2C+unknown+function	232.7	86.6	165.9	113.7	84.3	60.3	24.5	39.4	101.7	909.1	0
PF3D7_0206400	chr2	254824	262443	+	255000	812656	conserved+Plasmodium+protein%2C+unknown+function	249.3	178.1	254.9	125.3	80.2	41.2	25.7	48	27	1029.7	0
PF3D7_0206500	chr2	263037	267347	-	265000	812657	conserved+Plasmodium+protein%2C+unknown+function	10.5	9	15.7	0	7.4	6.4	5.1	17.6	13.2	84.9	0
PF3D7_0206600	chr2	270078	270619	-	275000	812658	transcription+factor%2C+putative	291.8	236.6	289.1	188.7	157.6	172.4	1301.8	353.6	336	3327.6	0
PF3D7_0206700	chr2	271594	273009	+	275000	ASL	adenylosuccinate+lyase+%28ASL%29	430.6	454.5	609	360.9	270	225.4	188.2	191.5	91.8	2821.9	0
PF3D7_0206800	chr2	273689	274507	-	275000	MSP2	merozoite+surface+protein+2+%28MSP2%29	212.6	88.6	169.1	1554.6	5972.8	7608.9	103.8	103.8	26.9	15841.1	0
PF3D7_0206900.1	chr2	275540	276577	-	275000	MSP5	merozoite+surface+protein+5+%28MSP5%29	23.9	13.3	72.9	97.5	212.2	402.9	21.1	14.2	316.6	1174.6	0
PF3D7_0207000	chr2	277494	278456	-	275000	MSP4	merozoite+surface+protein+4+%28MSP4%29	24.6	16.8	40.4	88.5	207.4	204.9	34.5	145.8	165.8	928.7	0
PF3D7_0207100	chr2	281907	287345	+	285000	812663	conserved+Plasmodium+protein%2C+unknown+function	0	7.8	10	18.7	61.4	82.1	0	54.4	29.5	263.9	0
PF3D7_0207200	chr2	288183	288665	-	285000	812664	iron-sulfur+assembly+protein%2C+putative	0	0	44.3	9.2	2.9	15.1	11.5	27.4	89.7	200.1	1
PF3D7_0207300	chr2	290168	292703	-	295000	SERA8	serine+repeat+antigen+8+%28SERA8%29	0	8.3	0.6	0	0	6.1	2.1	2	464.8	483.9	1
PF3D7_0207400	chr2	294273	297616	-	295000	SERA7	serine+repeat+antigen+7+%28SERA7%29	0	0	37.4	102.6	225.6	108.4	0	0.8	6.8	481.6	0
PF3D7_0207500	chr2	298897	302564	-	305000	SERA6	serine+repeat+antigen+6+%28SERA6%29	3.1	0	13.8	186.8	450.5	139	13.1	0	0	806.3	0
PF3D7_0207600	chr2	303593	307027	-	305000	SERA5	serine+repeat+antigen+5+%28SERA5%29	41	0	244.3	1707.2	3035	1755.8	10.9	46.5	32.1	6872.8	0
PF3D7_0207700	chr2	308847	312155	-	315000	SERA4	serine+repeat+antigen+4+%28SERA4%29	0	0	7.2	151	333.8	196	0	0	0	688	0
PF3D7_0207800	chr2	313449	316741	-	315000	SERA3	serine+repeat+antigen+3+%28SERA3%29	32	27.6	39.3	182.7	367.9	219.1	13	28.8	62.6	973	0
PF3D7_0207900	chr2	317596	321310	-	315000	SERA2	serine+repeat+antigen+2+%28SERA2%29	33.3	58.5	78.3	89.8	147.3	132.7	87.3	39	132.1	798.3	0
PF3D7_0208000	chr2	322338	325723	-	325000	SERA1	serine+repeat+antigen+1+%28SERA1%29	0	4.4	0	0	8	7.5	0	9.9	10.3	40.1	0
PF3D7_0208100.1	chr2	327932	335203	+	335000	812673	conserved+Plasmodium+protein%2C+unknown+function	0	3.4	28.8	26.6	41.4	19.9	12.9	129.5	0	262.5	0
PF3D7_0208200	chr2	335679	336581	-	335000	812674	RNA+binding+protein%2C+putative	183.7	51.6	140.1	63.8	37.2	16.6	38.7	98	31.1	660.8	0
PF3D7_0208300	chr2	337558	342966	+	345000	812675	conserved+Plasmodium+protein%2C+unknown+function	54.1	24.2	30	7.8	18.2	18.4	16.2	19	0	187.9	0
PF3D7_0208400	chr2	343308	349340	-	345000	812676	conserved+Plasmodium+protein%2C+unknown+function	59.5	28.8	74.7	68.2	98.2	37.4	0	86.4	20.2	473.4	0
PF3D7_0208500	chr2	352836	353628	+	355000	ACP	acyl+carrier+protein+%28ACP%29	13.3	15.7	69	52	107.4	41.9	31.9	72.7	83.2	487.1	0
PF3D7_0208600	chr2	354621	356117	+	355000	RRF	ribosome-recycling+factor%2C+putative+%28RRF%29	7.7	3.2	24.9	15.3	21.6	2.2	7.4	79.2	33	194.5	0
PF3D7_0208700.1	chr2	356501	358014	-	355000	PFB0391c	conserved+Plasmodium+protein%2C+unknown+function	181.2	162.7	355.5	240.3	132	77.8	14.2	381	63.7	1608.4	0
PF3D7_0208800	chr2	359142	359849	+	355000	812680	conserved+Plasmodium+protein%2C+unknown+function	0	8.6	1	8.3	8.3	0	0	37	0	63.2	0
PF3D7_0208900	chr2	360828	368354	+	365000	P230p	6-cysteine+protein+%28P230p%29	11.6	14.2	22.9	26.9	23.3	19.5	25.1	93.2	107.9	344.6	1
PF3D7_0209000	chr2	370438	379845	+	375000	P230	6-cysteine+protein+%28P230%29	0	2.3	2.3	5.3	4.6	0	2.6	42.4	0	59.5	1
PF3D7_0209100	chr2	381130	383445	-	385000	812683	phospholipase+A2%2C+putative	45.6	24.7	46.3	53.6	54.4	7.3	20.9	27.1	59.4	339.3	0
PF3D7_0209200	chr2	384865	386580	-	385000	812684	3%27exoribonuclease%2C+putative	18	11	14.2	14.7	17.4	14.6	10.5	3.5	0.6	104.5	0
PF3D7_0209300	chr2	387273	388151	+	385000	IspF	2C-methyl-D-erythritol+2%2C4-cyclodiphosphate+synthase+%28IspF%29	5.1	30.8	116.8	81.2	82.8	20.4	0	2.8	7.4	347.3	0
PF3D7_0209500	chr2	391275	392789	-	395000	812686	conserved+Plasmodium+protein%2C+unknown+function	2.1	2.1	7.9	3.5	0	0	0	3.2	11.6	30.4	0
PF3D7_0209600	chr2	394237	398745	-	395000	PPM	transporter%2C+putative	28	33	33	94.5	242.6	233	51.3	46.6	93.8	855.8	0
PF3D7_0209700	chr2	400153	401859	-	405000	812688	RING+zinc+finger+protein%2C+putative	44	16.1	21.8	0	27.4	16.5	26	16.1	63.4	231.3	0
PF3D7_0209800	chr2	404281	406355	-	405000	UAP56	ATP-dependent+RNA+helicase+UAP56+%28UAP56%29	1655.9	1047.4	1943	1282.4	1059.9	519.3	809.7	1068.8	318.6	9705	0
PF3D7_0210000	chr2	409983	410228	+	415000	812690	secretory+complex+protein+61+gamma+subunit+%28Sec61-gamma%29	151.5	54.5	123.3	110.7	154.3	92.5	10	461.9	6.8	1165.5	0
PF3D7_0210100.1	chr2	412275	412859	+	415000	812691	60S+ribosomal+protein+L37ae%2C+putative	1669	1476.8	1613.9	1232.5	792.6	297.2	611.1	396.9	352	8442	0
PF3D7_0210200	chr2	413278	421137	-	415000	812692	conserved+Plasmodium+protein%2C+unknown+function	0	13.1	107.1	90.3	119.8	48.6	0.7	148.6	5.5	533.7	0
PF3D7_0210300	chr2	423063	424654	-	425000	PPM	monocarboxylate+transporter%2C+putative	25.5	111.4	274.1	387.3	384.2	211.1	27.7	95.3	36.8	1553.4	0
PF3D7_0210500	chr2	427490	431530	+	425000	812694	conserved+Plasmodium+protein%2C+unknown+function	3.8	0	7.1	3.5	0.2	3.4	0.5	0	0	18.5	0
PF3D7_0210600	chr2	432041	434086	-	435000	812695	conserved+Plasmodium+protein%2C+unknown+function	68.6	29.5	48.3	68.2	490.4	932.8	45.6	760.2	144.4	2588	0
PF3D7_0210700	chr2	436050	436994	+	435000	SYN17	syntaxin%2C+Qa-SNARE+family+%28SYN17%29	0	0	0	0	0	0	0	25.1	0	25.1	1
PF3D7_0210800	chr2	437755	439002	-	435000	812697	conserved+Plasmodium+protein%2C+unknown+function	0	7.5	1.5	3.8	0	16.6	39.3	0	0	68.7	0
PF3D7_0210900	chr2	442080	442934	-	445000	812698	conserved+Plasmodium+protein%2C+unknown+function	538.1	375.3	504.3	279.1	376.8	357.8	493.7	308	493.8	3726.9	0
PF3D7_0211100	chr2	451751	455116	+	455000	812699	conserved+Plasmodium+protein%2C+unknown+function	0	2	26.6	0	0	0	0	11.8	0	40.4	0
PF3D7_0211200	chr2	455579	456286	-	455000	RAB5a	Rab+GTPase+5a+%28RAB5a%29	10.9	38.5	138.9	221.7	127.8	109.3	0	100	8.5	755.6	0
PF3D7_0211300	chr2	457130	458585	-	455000	812701	conserved+Plasmodium+protein%2C+unknown+function	0	0	6.9	5.9	2	0	0	17.9	0	32.7	0
PF3D7_0211400	chr2	459072	461518	-	465000	486945	beta-ketoacyl-ACP+synthase+III+%28KASIII%29	6.9	10.6	16.4	28.6	25.9	23	35.5	83.8	26.9	257.6	1
PF3D7_0211500	chr2	463163	466900	+	465000	812703	GAF+domain-related+protein%2C+putative	0	0	0	2	0	0.9	0	6.8	0	9.7	0
PF3D7_0211600	chr2	467847	468476	+	465000	812704	dolichol-linked+oligosaccharide+biosynthesis+enzyme%2C+putative	1.2	0	16	36.9	106.6	74.3	6.5	38.1	59.5	339.1	0
PF3D7_0211700	chr2	469790	473491	+	475000	TKL1	protein+kinase%2C+putative+%28TKL1%29	3.8	19	26.7	57.2	51.3	17.9	3.6	19.5	23.4	222.4	0
PF3D7_0211800	chr2	475242	477074	+	475000	812706	asparagine-tRNA+ligase%2C+putative	589.4	494.6	854	693.4	573.2	247.3	39.2	493.1	106.2	4090.4	0
PF3D7_0211900	chr2	477432	479091	-	475000	812707	conserved+Plasmodium+protein%2C+unknown+function	6.9	15	67.8	48.3	51.8	15.8	0	34.4	23.8	263.8	0
PF3D7_0212000	chr2	480100	481432	+	485000	812708	GDP-fructose%3AGMP+antiporter%2C+putative	10.5	43.4	253.3	380.5	418.6	258.3	18.6	307.7	90.6	1781.5	0
PF3D7_0212100	chr2	483436	488970	+	485000	812709	conserved+Plasmodium+protein%2C+unknown+function	40.7	9.8	70.2	43.5	98.7	10.6	0	18.3	10.3	302.1	0
PF3D7_0212200	chr2	489904	490818	-	495000	812710	mitochondrial+ribosomal+protein+L12+precursor%2C+putative	17.5	7.9	38.7	62.2	11.1	0	4.3	12.7	0	154.4	0
PF3D7_0212300	chr2	492616	494306	+	495000	812711	peptide+chain+release+factor+subunit+1%2C+putative	250.7	167.3	312.5	226.6	214.8	72.4	144.5	685.8	10.9	2085.5	0
PF3D7_0212400	chr2	495166	507854	-	505000	812712	conserved+Plasmodium+membrane+protein%2C+unknown+function	414.9	261.7	487.3	359.4	394.7	182.1	14.9	146	356.2	2617.2	0
PF3D7_0212500	chr2	509525	521746	+	515000	812713	conserved+Plasmodium+protein%2C+unknown+function	130.9	73.8	128.2	103.1	85.5	105.6	28.6	92.7	150.7	899.1	0
PF3D7_0212600	chr2	522931	523999	+	525000	SPATR	secreted+protein+altered+thrombospondin+repeat+protein+%28SPATR%29	27	0	11.1	70	320.7	513.3	73.3	42.9	1203.7	2262	0
PF3D7_0212700	chr2	524700	526043	-	525000	812715	conserved+Plasmodium+protein%2C+unknown+function	20.9	14.8	35.5	18.9	37.6	11.3	0	540.1	60.8	739.9	0
PF3D7_0212800	chr2	528249	531923	+	535000	812716	multidrug+efflux+pump%2C+putative	0	3.9	15.5	9	1.3	2.8	0	9.9	7.2	49.6	0
PF3D7_0212900	chr2	533253	534350	+	535000	812717	Leu%2FPhe-tRNA+protein+transferase%2C+putative	21.6	21.2	127.6	245.9	417.9	234.9	25.3	115	75.3	1284.7	0
PF3D7_0213000	chr2	535646	536146	+	535000	812718	conserved+Plasmodium+protein%2C+unknown+function	16.3	61.3	280	341.4	276.6	140.4	12.1	1097	425.4	2650.5	0
PF3D7_0213100	chr2	537789	539420	+	535000	812719	heat+shock+protein+40%2C+putative	348.5	470.4	860.8	559.4	436.8	198.4	88.2	798.1	176.9	3937.5	0
PF3D7_0213200	chr2	540409	540969	-	545000	812720	conserved+Plasmodium+protein%2C+unknown+function	10.4	42.8	123.3	101.7	95.5	62	0	116	22.8	574.5	0
PF3D7_0213400	chr2	541811	543807	+	545000	PK7	protein+kinase+7+%28PK7%29	0	3.4	52.1	33.1	31.8	8.6	0	33	4.7	166.7	0
PF3D7_0213500	chr2	543802	545895	-	545000	812722	conserved+Plasmodium+protein%2C+unknown+function	1.3	0	6.2	0	0	0	0	20.7	0	28.2	0
PF3D7_0213600	chr2	546482	555294	-	555000	812723	conserved+Plasmodium+protein%2C+unknown+function	0	16.1	3.2	1	3.6	0	8.6	57.6	8.2	98.3	1
PF3D7_0213700	chr2	557048	557696	+	555000	812724	conserved+protein%2C+unknown+function	129.5	196.7	358.9	202.7	57.1	27.8	0	446.4	83.9	1503	0
PF3D7_0213800	chr2	558585	560594	+	555000	812725	conserved+Plasmodium+protein%2C+unknown+function	0	0	0	0	1.9	0	0	73.7	0	75.6	1
PF3D7_0213900	chr2	561122	564622	-	565000	812726	conserved+Plasmodium+protein%2C+unknown+function	73.4	77.2	102.3	66.6	24.9	26.8	27.3	82.3	51.4	532.2	0
PF3D7_0214000	chr2	566121	567894	+	565000	812727	T-complex+protein+1%2C+putative	112.1	156.7	208.3	137.5	56	28.2	25.7	64.6	20.1	809.2	0
PF3D7_0214100	chr2	568529	573315	-	575000	COPII	protein+transport+protein+sec31+%28SEC31%29	152.7	98.4	103.5	123.7	203.3	85.7	132.1	82.4	315.5	1297.3	1
PF3D7_0214200	chr2	575155	576054	-	575000	812729	mitochondrial+ribosomal+protein+L13+precursor%2C+putative	1.8	10.8	40.2	43	27.2	18.9	37.2	18.1	40.7	237.9	0
PF3D7_0214300	chr2	578662	586164	+	585000	812730	conserved+Plasmodium+protein%2C+unknown+function	0	0	0	0	0	0	0	0.6	0	0.6	0
PF3D7_0214400	chr2	586765	589051	-	585000	812731	conserved+Plasmodium+protein%2C+unknown+function	174.9	159.6	141.4	101.1	54.3	25.6	27	424.8	135.4	1244.1	0
PF3D7_0214500	chr2	590501	591421	+	595000	812732	conserved+Plasmodium+protein%2C+unknown+function	3.7	1.4	15.4	0.4	2.6	0	0	4.2	0	27.7	0
PF3D7_0214600	chr2	594196	599340	+	595000	812733	serine%2Fthreonine+protein+kinase%2C+putative	8.1	4.9	4.4	16	105.9	282.6	5.9	14.3	831.2	1273.3	0
PF3D7_0214700	chr2	599829	601712	-	605000	812734	conserved+Plasmodium+protein%2C+unknown+function	0.9	3	0	0	8.5	8	3.4	2.5	0	26.3	0
PF3D7_0214800	chr2	605045	609325	+	605000	812735	conserved+Plasmodium+membrane+protein%2C+unknown+function	146.1	110.1	130.3	59.4	69.8	114.5	31.9	0	7	669.1	0
PF3D7_0214900	chr2	610625	615372	+	615000	RON6	rhoptry+neck+protein+6+%28RON6%29	5.3	0	11.6	30	231.6	219.2	0	36.1	15.8	549.6	0
PF3D7_0215000	chr2	616772	619429	-	615000	ACS9	acyl-CoA+synthetase%2C+PfACS9+%28ACS9%29	0	6.5	71.7	110.1	122.9	53	0.7	225.1	57.9	647.9	0
PF3D7_0215100	chr2	622524	624306	-	625000	812738	RING+zinc+finger+protein%2C+putative	47.6	30.8	101.8	94.8	127.6	96.4	6.2	60.1	3.2	568.5	0
PF3D7_0215200	chr2	626976	627710	+	625000	812739	conserved+Plasmodium+protein%2C+unknown+function	0	0	0	0	0.6	0	0	16.7	44.2	61.5	1
PF3D7_0215300	chr2	628642	631308	-	625000	ACS8	acyl-CoA+synthetase+%28ACS8%29	54.7	19.8	2.8	0	0	5.8	50.3	0	10.3	143.7	0
PF3D7_0215400	chr2	634589	637507	-	635000	812741	conserved+Plasmodium+protein%2C+unknown+function	21.5	19.9	23.4	19.9	15.2	18.1	23	31.3	49.7	222	0
PF3D7_0215500	chr2	640400	642694	+	645000	812742	conserved+Plasmodium+protein%2C+unknown+function	142.9	96.5	177.4	100.9	124	130.3	51.7	103.1	253.1	1179.9	0
PF3D7_0215600	chr2	643106	644317	-	645000	812743	conserved+Plasmodium+protein%2C+unknown+function	147.8	90.9	133.7	126.1	98.6	53.1	6.9	254.7	89.6	1001.4	0
PF3D7_0215700	chr2	645929	650085	+	645000	812744	DNA-directed+RNA+polymerase+II+second+largest+subunit%2C+putative	417.7	450.3	549.1	477	292.7	109.3	56	183.7	182.2	2718	0
PF3D7_0215800	chr2	650663	653362	-	655000	ORC5	origin+recognition+complex+subunit+5+%28ORC5%29	0	14.4	76.4	95.9	93.1	20.6	0	42.4	15.6	358.4	0
PF3D7_0215900	chr2	654918	656840	-	655000	812746	zinc+finger+protein%2C+putative	11.4	1.9	43.7	52.1	57.6	90.8	42.2	164.4	89.2	553.3	0
PF3D7_0216000	chr2	658636	664629	+	665000	812747	DEAD%2FDEAH+box+helicase%2C+putative	1	0	1.3	5.9	11.4	10.7	4.3	887.5	33.2	955.3	1
PF3D7_0216200	chr2	668985	669841	-	665000	PFB0735c	conserved+Plasmodium+protein%2C+unknown+function	3.1	17.5	45	32.3	22.1	5.5	0	11	7.8	144.3	0
PF3D7_0216300	chr2	670413	674558	+	675000	812749	conserved+Plasmodium+protein%2C+unknown+function	29.7	31.3	75.7	48.3	14.7	10	8.8	14.6	86.3	319.4	0
PF3D7_0216400	chr2	675431	677599	+	675000	812750	vacuolar+protein-sorting+protein+VPS45%2C+putative	0.4	8.3	88.7	100.3	116	29.3	0	63.1	16.8	422.9	0
PF3D7_0216500	chr2	678487	683703	+	685000	812751	conserved+Plasmodium+protein%2C+unknown+function	0	0	9.7	8.1	19.3	8.4	0	38.3	71.7	155.5	0
PF3D7_0216600	chr2	686485	688545	+	685000	812752	MtN3-like+protein	104.4	51.5	71.5	78.6	178	150.2	90.2	162.1	95.9	982.4	0
PF3D7_0216700.1	chr2	690311	695783	+	695000	812753	conserved+Plasmodium+protein%2C+unknown+function	0	0	4.8	1.9	6.5	0	5.9	28.9	165.6	213.6	0
PF3D7_0216800	chr2	696193	699561	-	695000	812754	conserved+Plasmodium+membrane+protein%2C+unknown+function	0	0	0	13.9	60.1	10.7	0	14.2	0	98.9	0
PF3D7_0216900	chr2	701245	702894	+	705000	812755	conserved+Plasmodium+protein%2C+unknown+function	0	3.3	27.3	21.8	75.4	0.7	2.5	18.3	10.8	160.1	0
PF3D7_0217000	chr2	703090	706587	-	705000	812756	conserved+Plasmodium+membrane+protein%2C+unknown+function	0	0	0	0	6.7	0	0	22.6	0	29.3	0
PF3D7_0217100	chr2	707738	709393	+	705000	812757	ATP+synthase+F1%2C+alpha+subunit	12.4	24.5	276.2	335.9	457.5	179.1	12.9	1005.6	472.5	2776.6	0
PF3D7_0217200	chr2	709799	715252	-	715000	812758	conserved+Plasmodium+protein%2C+unknown+function	2.1	0	21.1	6.7	10.6	0	0	28.3	15.8	84.6	0
PF3D7_0217300	chr2	715798	716549	-	715000	812759	clathrin+coat+assembly+protein%2C+putative	96.2	17.9	38.3	42.8	60.6	40.9	28.2	75.4	107.5	507.8	0
PF3D7_0217400	chr2	717692	718281	+	715000	812760	conserved+Plasmodium+protein%2C+unknown+function	14.6	21.7	71.7	92.8	119.3	88.1	0	137.4	51.3	596.9	0
PF3D7_0217500	chr2	720437	722661	+	725000	9878	calcium+dependent+protein+kinase+1+%28CDPK1%29	34.1	0	13.6	157.3	961.5	1182	16.1	316.7	927	3608.3	0
PF3D7_0217600	chr2	723747	729932	-	725000	812763	conserved+Plasmodium+protein%2C+unknown+function	0.2	0.5	7.1	0	0.9	0	0	0	0	8.7	0
PF3D7_0217700	chr2	731120	732312	-	735000	812764	conserved+Plasmodium+protein%2C+unknown+function	0	1.6	6.6	0	0	0	0	0.2	0	8.4	0
PF3D7_0217800	chr2	734272	734595	+	735000	812765	40S+ribosomal+protein+S26e%2C+putative	1105.3	1092.2	1295.6	652	504	209.5	161.7	730.7	108.3	5859.3	0
PF3D7_0217900	chr2	735438	736997	-	735000	812766	conserved+Plasmodium+protein%2C+unknown+function	0	11.6	112.1	125	144.7	57.8	8.9	24	0	484.1	0
PF3D7_0218000	chr2	738860	739852	+	735000	812767	replication+factor+C%2C+subunit+2%2C+putative	0	13.1	114.9	117.8	137.7	42.4	0	78.6	1.2	505.7	0
PF3D7_0218100	chr2	741014	742459	+	745000	812768	conserved+Plasmodium+membrane+protein%2C+unknown+function	13.4	0.1	29.9	67.9	45.9	110.3	0	364.3	31.9	663.7	0
PF3D7_0218300	chr2	747566	749365	-	745000	PFB0855c	apicoplast+RNA+methyltransferase+precursor%2C+putative	5.7	0	19.1	0	2.5	0	0	13.1	17.1	57.5	0
PF3D7_0218400	chr2	750049	751737	-	755000	812770	DEAD%2FDEAH+box+ATP-dependent+RNA+helicase%2C+putative	223.9	227.9	226.5	133.6	89.7	47.5	89.5	88.6	35	1162.2	0
PF3D7_0218500	chr2	752966	753439	+	755000	812771	small+nuclear+ribonucleoprotein+Sm+D2%2C+putative+%28SNRPD2%29	202.2	152.7	287.1	237	139.3	82.2	114.8	83.7	51.2	1350.2	0
PF3D7_0218600	chr2	755418	762560	+	755000	812772	conserved+Plasmodium+protein%2C+unknown+function	75.3	83.1	184.4	88.5	67.2	52.6	0	84.4	136.4	771.9	0
PF3D7_0218700	chr2	763491	765191	-	765000	PRP45	pre-mRNA-processing+protein+45%2C+putative+%28PRP45%29	157	144.3	214.5	186.7	118.3	108.1	176.7	164.1	398.9	1668.6	0
PF3D7_0219100	chr2	769761	771041	+	775000	812774	conserved+protein%2C+unknown+function	19.2	22	46.8	32.4	9.4	13.4	13	87.3	36.4	279.9	0
PF3D7_0219200	chr2	772316	772690	+	775000	812775	40S+ribosomal+protein+S30%2C+putative	2547.2	2161.5	3186.6	2619	1737.6	1255.1	2309.3	809.2	138.3	16763.8	0
PF3D7_0219300	chr2	773335	773754	-	775000	812776	conserved+Plasmodium+protein%2C+unknown+function	20.9	39.7	48.9	35.3	62.7	25.8	31.3	72	5.3	341.9	0
PF3D7_0219400.2	chr2	774815	776036	+	775000	PFB0888w	ribosome+associated+membrane+protein+RAMP4%2C+putative	1520.3	2052.6	2520.6	3568.5	3662.4	3471.5	617.7	7534.7	1606.3	26554.6	0
PF3D7_0219500	chr2	776828	778065	-	775000	812778	pseudouridine+synthase%2C+putative	0	1	23.8	36.3	37.8	11.8	0	39.7	0	150.4	0
PF3D7_0219600	chr2	779418	782132	-	785000	812779	replication+factor+C+subunit+1%2C+putative	0	14.8	72.2	92.5	116.7	36.6	4.3	43.9	10.7	391.7	0
PF3D7_0219700	chr2	783723	784828	-	785000	812780	Plasmodium+exported+protein+%28PHISTc%29%2C+unknown+function+%28GEXP20%29	247.9	28.4	50.2	21.4	35.1	86.4	746.6	2.4	11.3	1229.7	0
PF3D7_0219800	chr2	786870	787940	-	785000	812781	Plasmodium+exported+protein+%28PHISTc%29%2C+unknown+function	86.9	41.5	36.7	58.7	128.3	103.6	375.4	63.9	43.1	938.1	0
PF3D7_0219900	chr2	791464	792381	+	795000	812782	Plasmodium+exported+protein%2C+unknown+function	74.6	15	4.2	0	13.7	19.6	83.7	7.8	1.4	220	0
PF3D7_0220000	chr2	796752	801586	+	795000	LSA3	liver+stage+antigen+3+%28LSA3%29	460.1	104.6	198.3	177.6	275	287.2	625.9	11.4	34.1	2174.2	0
PF3D7_0220100	chr2	804520	807741	+	805000	812784	DnaJ+protein%2C+putative	20.9	10.3	8.8	0.9	6.7	14.1	49.3	13.9	46	170.9	0
PF3D7_0220200	chr2	809511	810298	-	805000	812785	Plasmodium+exported+protein%2C+unknown+function	2547.5	3494.6	5870	4417.9	3630.9	2362.8	1119.7	16.2	67.6	23527.2	0
PF3D7_0220300	chr2	813827	814654	-	815000	812786	Plasmodium+exported+protein%2C+unknown+function	129.4	256.3	284.7	130.1	161.5	65.3	2.9	0.4	175.2	1205.8	0
PF3D7_0220400	chr2	820429	822541	+	825000	812787	DnaJ+protein%2C+putative	0	0	0	0	0	0	0	0	0	0	0
PF3D7_0220500	chr2	823825	824864	-	825000	812788	Plasmodium+exported+protein+%28hyp2%29%2C+unknown+function	37.6	36.3	16.5	23.6	24.6	72.7	22.2	0	4.8	238.3	0
PF3D7_0220600	chr2	831189	832005	+	835000	812789	Plasmodium+exported+protein+%28hyp9%29%2C+unknown+function	91.1	157.1	315.7	159.8	98.2	30.9	161.9	0	25.3	1040	0
PF3D7_0220700	chr2	833805	834688	+	835000	812790	Plasmodium+exported+protein+%28hyp9%29%2C+unknown+function	28.1	36.8	27.9	31.2	13.4	61.9	159.3	2.1	12.1	372.8	0
PF3D7_0220800	chr2	838843	844116	+	845000	CLAG2	cytoadherence+linked+asexual+protein+2+%28CLAG2%29	1	0	3.2	5.4	179.3	119.9	0	0	0	308.8	0
PF3D7_0220900	chr2	845600	846375	-	845000	812792	Plasmodium+exported+protein%2C+unknown+function%2C+pseudogene	0	0	0	0	0	0	40.1	3.2	18.8	62.1	0
PF3D7_0221000	chr2	848092	849119	+	845000	812793	Plasmodium+exported+protein%2C+unknown+function	0.3	0	0	0	0	7.2	9.6	8.4	25.4	50.9	0
PF3D7_0221200	chr2	854966	855738	+	855000	812794	Plasmodium+exported+protein+%28hyp15%29%2C+unknown+function	0	0	27.8	0	0	0	0	0	8.5	36.3	0
PF3D7_0221400	chr2	860466	861504	+	865000	812795	stevor	12.2	0	6.8	3.9	0.8	0	17.9	3.5	36.4	81.5	1
PF3D7_0221500	chr2	863079	863842	-	865000	812796	Pfmc-2TM+Maurer%27s+cleft+two+transmembrane+protein%2C+pseudogene	0	0	0	0	0	0	0	0	0	0	0
PF3D7_0221600	chr2	865916	866538	-	865000	812797	Plasmodium+exported+protein%2C+unknown+function%2C+pseudogene	2.2	9.9	0	6.5	12.6	10.5	9.8	6.3	3.7	61.5	0
PF3D7_0221700	chr2	869508	871202	-	875000	812798	Plasmodium+exported+protein%2C+unknown+function	20	3.4	13.8	0	0	0	7.4	0	0	44.6	0
PF3D7_0221800	chr2	873131	873319	+	875000	812799	hypothetical+protein	0	0	0	0	0	0	0	0	248.2	248.2	0
PF3D7_0222100	chr2	878468	879251	-	875000	812805	Pfmc-2TM+Maurer%27s+cleft+two+transmembrane+protein+%28MC-2TM%29	33.8	347	252.7	79.9	34	31.2	64.5	54.4	202.2	1099.7	0
PF3D7_0222400	chr2	886625	887802	+	885000	812808	rifin%2C+pseudogene+%28RIF+pseudogene%29	1611.6	1246.4	1481.8	1947.4	2202.3	2034.2	2236.6	1731.8	3364.9	17857	0
PF3D7_0222500	chr2	889660	890745	+	895000	RIF	rifin+%28RIF%29	0.9	5.7	0	5	5	0	11.8	0.3	14.2	42.9	0
PF3D7_0222600	chr2	892856	894206	+	895000	RIF	rifin+%28RIF%29	7.1	5.4	13.8	10.6	1.9	16.4	11.5	8.8	26.8	102.3	1
PF3D7_0222700	chr2	896226	897420	+	895000	RIF	rifin+%28RIF%29	9.4	5.7	8.7	2.4	9.9	10.7	18.6	38.3	20.2	123.9	0
PF3D7_0222800	chr2	899430	900445	+	895000	812812	stevor	9.7	25.1	19.4	19.1	10	16.5	40	33.1	112.8	285.7	0
PF3D7_0222900	chr2	901494	902853	+	905000	812813	erythrocyte+membrane+protein+1+%28PfEMP1%29%2C+exon2%2C+pseudogene	1587.5	1251.2	1469.2	1954.3	2234.8	2023.7	2229.7	1681.6	3276.9	17708.9	0
PF3D7_0223100	chr2	904551	905775	+	905000	RIF	rifin+%28RIF%29	11.3	17	10.4	0.2	5.7	0	0	0	4.7	49.3	0
PF3D7_0223200	chr2	907678	908861	+	905000	RIF	rifin+%28RIF%29	43.8	28.1	30.3	24.8	47.2	38.4	45.4	14.8	79.3	352.1	0
PF3D7_0223300	chr2	909350	911054	+	915000	812817	erythrocyte+membrane+protein+1+%28PfEMP1%29%2C+truncated	0.8	37.3	9.6	14.8	22.7	16.9	22	7.9	5.7	137.7	0
PF3D7_0223400	chr2	913244	914457	+	915000	RIF	rifin+%28RIF%29	15.5	19.8	21.6	24	12.2	23.1	29.1	17.8	63.2	226.3	0
PF3D7_0223500	chr2	916352	923648	-	925000	VAR	erythrocyte+membrane+protein+1%2C+PfEMP1+%28VAR%29	61.1	12.4	4.4	10.5	1.7	5.5	25.9	7.4	25.4	154.3	0
PF3D7_0300100	chr3	36965	44482	+	45000	VAR	erythrocyte+membrane+protein+1%2C+PfEMP1+%28VAR%29	62.3	30.1	42	48.7	51.9	21	33.1	40.3	68.3	397.7	0
PF3D7_0300200	chr3	46369	47579	-	45000	RIF	rifin+%28RIF%29	0	4.5	6.3	0	0	0	8.2	0	20.2	39.2	0
PF3D7_0300400	chr3	52280	53273	-	55000	814324	stevor	17.5	38.1	33.4	28	32.7	21.7	13.1	14.2	35.9	234.6	0
PF3D7_0300500	chr3	55390	56584	-	55000	RIF	rifin+%28RIF%29	12.4	11.1	14.2	15.1	0.3	8.9	14.9	5.5	31.3	113.7	0
PF3D7_0300700	chr3	61445	62714	+	65000	RIF	rifin+%28RIF%29	15	10.2	19.5	4.9	9.4	2.4	15.7	16.1	29	122.2	0
PF3D7_0300800	chr3	64572	65783	+	65000	RIF	rifin+%28RIF%29	0	0	0	0	16.4	23.9	11.4	0.9	89.9	142.5	0
PF3D7_0300900	chr3	67928	68682	+	65000	814327	stevor-like	0	0	0	0	0	5.6	0	0	0	5.6	0
PF3D7_0301000	chr3	69460	71919	-	75000	ACS2	acyl-CoA+synthetase+%28ACS2%29	4.8	4.9	8.9	0.4	4.7	0.9	12.7	19.1	51.2	107.6	0
PF3D7_0301100	chr3	76494	77474	+	75000	814329	Plasmodium+exported+protein+%28hyp13%29%2C+unknown+function	0	0	0	0	0	0	0	0	0	0	0
PF3D7_0301200	chr3	78195	80393	-	75000	FIKK3	serine%2Fthreonine+protein+kinase%2C+FIKK+family+%28FIKK3%29	35.7	3	6.9	8.7	25.8	34.5	124.3	4.9	10.6	254.4	0
PF3D7_0301300	chr3	82011	83515	-	85000	814331	alpha%2Fbeta+hydrolase%2C+putative	49.2	34.8	41.3	21.3	17.8	30.2	26.2	13.6	35.2	269.6	0
PF3D7_0301400	chr3	85305	86131	-	85000	C0H467	Plasmodium+exported+protein%2C+unknown+function	52.2	29	65.3	43.9	61.4	30.4	39.1	34.4	39.5	395.2	0
PF3D7_0301500	chr3	88250	89231	-	85000	814333	Plasmodium+exported+protein%2C+unknown+function	1.1	12.6	0	0	0	0	2.4	4.9	0	21	0
PF3D7_0301600	chr3	91115	93463	-	95000	C0H468	Plasmodium+exported+protein+%28hyp1%29%2C+unknown+function+%28GEXP21%29	879.8	637.7	669.9	231.1	121.6	270.1	982.8	169.5	45.2	4007.7	0
PF3D7_0301700	chr3	96568	97907	-	95000	814335	Plasmodium+exported+protein%2C+unknown+function	185.8	270.5	381.9	256.1	258.7	77.8	83.1	0	0	1513.9	0
PF3D7_0301800	chr3	104325	105281	+	105000	814336	Plasmodium+exported+protein%2C+unknown+function	122.5	13.9	6.9	5.4	15.8	118.1	969.7	0.3	11.5	1264.1	0
PF3D7_0301900	chr3	105913	107109	-	105000	814337	conserved+Plasmodium+protein%2C+unknown+function	0	0	0	0	0	0	0	0	0	0	0
PF3D7_0302000	chr3	107961	109880	-	105000	814338	golgi+organization+and+biogenesis+factor%2C+putative	146.2	132.3	174.3	112.7	136.4	91.4	137.1	240.1	264.7	1435.2	0
PF3D7_0302100	chr3	114070	118086	+	115000	SRPK1	serine%2Fthreonine+protein+kinase+%28SRPK1%29	65.2	8	32.3	21.7	1.3	3.8	0	28.7	18.3	179.3	0
PF3D7_0302200	chr3	119458	124735	+	125000	814340	cytoadherence+linked+asexual+protein+3.2+%28CLAG3.2%29	17.8	25.1	28.5	95.3	530.5	645.1	34.4	10.2	40.6	1427.5	0
PF3D7_0302300	chr3	125992	130235	-	125000	9221791	erythrocyte+membrane+protein+1+%28PfEMP1%29%2C+pseudogene	20.7	4.3	0	0	0	0	0	0	0	25	0
PF3D7_0302500	chr3	135418	140660	+	135000	814342	cytoadherence+linked+asexual+protein+3.1+%28CLAG3.1%29	105.2	25.8	77.9	649.6	4568.6	4184.9	45.3	43.7	25.9	9726.9	0
PF3D7_0302600	chr3	141556	145653	+	145000	814343	ABC+transporter%2C+%28TAP+family%29%2C+putative	0	23.1	93.9	100.2	62.9	16.4	1.6	11.2	0	309.3	0
PF3D7_0302700	chr3	146372	147056	-	145000	814344	CDGSH+iron-sulfur+domain-containing+protein%2C+putative	1	21.4	46.5	85	66.1	34.4	0	221.4	45.2	521	0
PF3D7_0302800	chr3	148046	149305	-	145000	814345	conserved+Plasmodium+protein%2C+unknown+function	13.1	0	9.3	0	5.7	0	0	0.6	0	28.7	0
PF3D7_0302900	chr3	152168	156146	-	155000	814346	exportin+1%2C+putative	63.7	45.9	65.8	77.8	54.4	17.8	3.8	36	14	379.2	0
PF3D7_0303000	chr3	159353	161704	-	165000	814347	N-ethylmaleimide+sensitive+fusion+protein%2C+putative	34.1	16	74.8	72.9	65	20.9	0	84.4	34.3	402.4	0
PF3D7_0303100	chr3	162778	167103	-	165000	814348	conserved+Plasmodium+protein%2C+unknown+function	1.9	5.4	6.2	8.7	25.1	23.6	0	8	0	78.9	0
PF3D7_0303200	chr3	169571	174300	+	175000	814349	HAD+superfamily+protein%2C+putative	20.5	34.7	86.9	198.9	386.6	252.3	6.6	142	377.3	1505.8	0
PF3D7_0303300	chr3	175022	175799	-	175000	814350	DNA-directed+RNA+polymerase+subunit+I%2C+putative	79.7	36.5	69	15.9	3.1	6.9	27.1	32.8	46	317	0
PF3D7_0303400	chr3	178420	181127	+	175000	814351	palmitoyl+transferase+%28AnkDHHC%29	0	0	0	38.3	83.3	38.1	1.8	24.8	0.2	186.5	0
PF3D7_0303500	chr3	182731	189411	+	185000	814352	spindle+pole+body+protein%2C+putative	10	35.1	106.3	57.8	73.2	26.2	4.6	56.3	10.7	380.2	0
PF3D7_0303700	chr3	191245	192591	-	195000	814354	dihydrolipoamide+acyltransferase%2C+putative	0	0	19.4	7.9	37.6	0	0	0.2	0	65.1	0
PF3D7_0303800	chr3	194430	196211	+	195000	814355	IBR+domain+protein%2C+putative	2.1	13	55	46.2	28.3	17.1	0	58.2	7	226.9	0
PF3D7_0303900	chr3	196570	197438	-	195000	814356	conserved+Plasmodium+protein%2C+unknown+function	0	0	5	12.6	14.6	4.4	0.6	5038.1	61.8	5137.1	1
PF3D7_0304000	chr3	198542	201584	-	205000	IMC1a	inner+membrane+complex+protein+1a%2C+putative+%28IMC1a%29	1.4	0	0	0	3.9	0	0	4.1	12.9	22.3	0
PF3D7_0304100	chr3	204542	206119	+	205000	ALV2	membrane+skeletal+protein+IMC1-related+%28ALV2%29	12.6	20.5	9.4	19.9	94.9	81.7	32.7	661	51.4	984.1	0
PF3D7_0304200	chr3	207342	208943	-	205000	PAST1	EH+%28Eps15+homology%29+protein+%28PAST1%29	445.5	291.3	261.9	200.8	328	281.9	282.9	527.7	1261.7	3881.7	1
PF3D7_0304300	chr3	212283	216572	+	215000	814361	conserved+Plasmodium+protein%2C+unknown+function	0	0	0	3.4	7.7	4.6	0	0	0	15.7	0
PF3D7_0304400	chr3	217941	218489	+	215000	814362	60S+ribosomal+protein+L44%2C+putative	73.6	9.3	67.6	29	39.2	0	20.4	20	18	277.1	0
PF3D7_0304500	chr3	219117	219872	-	215000	GLP1	1-cys-glutaredoxin-like+protein-1+%28GLP1%29	0	0	62.4	41.6	17.2	4.4	5.8	2.8	88.2	222.4	0
PF3D7_0304600	chr3	221323	222516	-	225000	CSP	circumsporozoite+%28CS%29+protein+%28CSP%29	61.6	282.3	835.3	428.6	620.2	262	162.9	691.4	28684.1	32028.4	1
PF3D7_0304700	chr3	224160	225793	-	225000	814365	conserved+Plasmodium+protein%2C+unknown+function	0	0	0	3.4	0	0	0	3	33.9	40.3	0
PF3D7_0304800	chr3	227057	231397	+	225000	814366	conserved+Plasmodium+membrane+protein%2C+unknown+function	0	0	31.8	19.8	32.2	17.5	0	10.4	10.5	122.2	0
PF3D7_0304900	chr3	231793	232305	-	235000	814367	conserved+Plasmodium+protein%2C+unknown+function	4.3	0	8.3	0	0	0	5.4	0	25.6	43.6	0
PF3D7_0305000	chr3	234058	235334	-	235000	EF-Ts	elongation+factor+Ts+%28EF-Ts%29	16.6	17.9	45.9	52.6	41.8	28.1	21.8	40.5	259.2	524.4	1
PF3D7_0305100	chr3	236334	248270	-	245000	814369	conserved+Plasmodium+protein%2C+unknown+function	0	12.2	76.1	66.6	62.4	14.2	0	85	11.8	328.3	0
PF3D7_0305200	chr3	251242	254661	+	255000	814370	conserved+Plasmodium+protein%2C+unknown+function	47.4	6.9	31.6	4.4	31.6	1.7	0	60.4	0	184	0
PF3D7_0305300	chr3	255276	258416	-	255000	814371	conserved+Plasmodium+membrane+protein%2C+unknown+function	37.2	15.9	12.3	13.4	3.4	11.2	25.1	17.9	26	162.4	0
PF3D7_0305400	chr3	260332	261085	+	265000	814372	conserved+Plasmodium+protein%2C+unknown+function	4.7	17.5	32.6	48.2	66.4	38.3	10.1	99.7	47.1	364.6	0
PF3D7_0305500	chr3	261485	273286	-	265000	814373	conserved+Plasmodium+protein%2C+unknown+function	89.9	76.9	142.8	71.5	104.5	64	0	23.1	45.6	618.3	0
PF3D7_0305600	chr3	275864	277717	-	275000	814374	AP+endonuclease+%28DNA-%5Bapurinic+or+apyrimidinic+site%5D+lyase%29%2C+putative	2.3	3.1	40.4	86.4	99.7	40.4	0	837.2	36.5	1146	0
PF3D7_0305700	chr3	278956	279828	-	275000	814375	ubiquitin+conjugating+enzyme+E2%2C+putative	373.5	193.9	287.9	322.2	358	295.8	9.9	574.7	236.6	2652.5	0
PF3D7_0305800	chr3	281916	285260	+	285000	814376	P-loop+containing+nucleoside+triphospahte+hydrolase%2C+putative	0	0	0	0	0	0	0	132.1	12.2	144.3	1
PF3D7_0305900	chr3	285579	286112	-	285000	814377	conserved+Plasmodium+protein%2C+unknown+function	0	0	1.3	0	0	0	0	20.2	0	21.5	0
PF3D7_0306000	chr3	286906	287319	-	285000	814378	conserved+Plasmodium+protein%2C+unknown+function	15.8	12	33.9	81.9	110.7	72.6	23.8	489.8	31	871.5	0
PF3D7_0306100	chr3	288637	290747	-	285000	814379	conserved+Plasmodium+protein%2C+unknown+function	8.7	0	0.7	0	0	0	0	8.4	0	17.8	0
PF3D7_0306200	chr3	292943	294548	+	295000	3N72	activator+of+Hsp90+ATPase+%28AHA1%29	16.7	23.9	76.1	42.9	20.4	5.3	0	133.5	40.2	359	0
PF3D7_0306300	chr3	295107	296094	-	295000	GRX1	glutaredoxin+1+%28GRX1%29	287	382.5	807.7	789.6	604.3	152.2	40.1	1353.4	274.6	4691.4	0
PF3D7_0306400	chr3	298517	300478	+	295000	814382	FAD-dependent+glycerol-3-phosphate+dehydrogenase%2C+putative	0	0.8	59.1	131.6	187	86.5	0	181.7	67.7	714.4	0
PF3D7_0306500	chr3	301007	301906	-	305000	814383	conserved+Plasmodium+protein%2C+unknown+function	4.1	1.7	35.3	65.2	87.2	37.1	1.7	151.9	0.8	385	0
PF3D7_0306600	chr3	302826	303083	+	305000	814384	conserved+Plasmodium+protein%2C+unknown+function	164.4	213	531.8	929.2	944.9	517.1	131.9	730	365.9	4528.2	0
PF3D7_0306700	chr3	304317	304999	+	305000	814385	conserved+Plasmodium+protein%2C+unknown+function	492.1	474.6	547.4	533.4	338.5	143.5	17.4	842.4	340.8	3730.1	0
PF3D7_0306800	chr3	306108	307984	-	305000	814386	T-complex+protein+beta+subunit%2C+putative	179.5	109.2	287.9	177.5	96.6	52.5	0	152.2	49.8	1105.2	0
PF3D7_0306900	chr3	310652	311805	+	315000	814387	40S+ribosomal+protein+S23%2C+putative	4282.6	4308.8	4425.4	3926.2	2694.2	1535.9	1028.5	430.2	1412.5	24044.3	0
PF3D7_0307100	chr3	312693	313342	-	315000	814388	40S+ribosomal+protein+S12%2C+putative	126.2	91	105.8	62.7	25	39.2	29.9	51.1	148.8	679.7	0
PF3D7_0307200	chr3	314976	316236	-	315000	814389	60S+ribosomal+protein+L7%2C+putative	152.9	97.3	133.3	82	92	30.4	23.7	99.8	100.2	811.6	0
PF3D7_0307300	chr3	318804	320336	+	315000	814390	EB1+homolog%2C+putative	0	0	0	0	5.5	0	9.7	63.6	15.4	94.2	1
PF3D7_0307400	chr3	321050	322162	-	325000	2F6I	ATP-dependent+Clp+protease+proteolytic+subunit+%28ClpP%29	0	21.7	129.1	175.6	144.6	120.2	0	164	11.4	766.6	0
PF3D7_0307500	chr3	322933	324836	-	325000	814392	conserved+Plasmodium+protein%2C+unknown+function	0.8	0	19	1.8	26	36.2	0	56.4	25.1	165.3	0
PF3D7_0307600	chr3	325922	328383	+	325000	814393	conserved+Plasmodium+protein%2C+unknown+function	0	21.8	74.9	57.7	69.2	41.2	20.7	104.1	132.8	522.4	0
PF3D7_0307700	chr3	328787	335269	-	335000	814394	conserved+Plasmodium+protein%2C+unknown+function	21.3	35.8	96	124.6	183.1	123.1	33.1	61.1	98.8	776.9	0
PF3D7_0307800	chr3	337179	339278	+	335000	814395	conserved+Plasmodium+protein%2C+unknown+function	28.3	12.4	46.5	35.3	35.4	14.9	0	28.1	27.5	228.4	0
PF3D7_0307900	chr3	340028	351652	-	345000	814396	conserved+Plasmodium+protein%2C+unknown+function	3.7	14.8	15.5	16.2	4.9	6.8	0	25.1	0	87	0
PF3D7_0308000	chr3	353549	355045	+	355000	643632	DNA+polymerase+epsilon+subunit+b%2C+putative	12	113.6	504.3	459.5	347.9	108.4	37.6	297.2	210.8	2091.3	0
PF3D7_0308100	chr3	356319	361454	+	355000	814398	conserved+Plasmodium+protein%2C+unknown+function	1.9	0	0	36.2	79.1	79.5	16.1	97.2	19.9	329.9	0
PF3D7_0308200	chr3	362342	364233	-	365000	814399	TCP-1%2Fcpn60+chaperonin+family%2C+putative	245.4	312.5	532.2	269.1	171.7	131.6	13.9	116	43	1835.4	0
PF3D7_0308300	chr3	365659	366672	-	365000	814400	conserved+Plasmodium+protein%2C+unknown+function	8.5	0	0	1.4	56.7	84.8	0.6	29.4	1.6	183	0
PF3D7_0308500	chr3	369925	370789	+	375000	814401	activator+of+Hsp90+ATPase%2C+putative	594.7	703.4	1256.8	897.7	549.1	279.7	619.5	251.9	314.5	5467.3	0
PF3D7_0308600	chr3	372632	374230	+	375000	814402	pre-mRNA-processing+factor+19%2C+putative+%28PRPF19%29	223.3	213.2	278.2	231.5	166	65.2	55.7	25.8	20.9	1279.8	0
PF3D7_0308700	chr3	375806	377437	+	375000	814403	conserved+Plasmodium+protein%2C+unknown+function	7.4	0	0	6.4	44.1	26.1	0	0	188.9	272.9	0
PF3D7_0308800	chr3	378045	378517	+	375000	814404	conserved+protein%2C+unknown+function	136.9	115.6	135.5	201	281.9	325.8	67.9	309.1	370.3	1944	0
PF3D7_0308900	chr3	379130	383290	-	385000	SF3B1	splicing+factor+3B+subunit+1%2C+putative+%28SF3B1%29	657.1	486.3	626.1	542.1	344.7	189.5	82.1	223	670	3820.9	0
PF3D7_0309000	chr3	384375	386879	+	385000	YVH1	dual+specificity+phosphatase+%28YVH1%29	229.5	250.3	316.7	257.4	208.7	126.9	39	344.6	147.5	1920.6	0
PF3D7_0309100	chr3	387219	388473	-	385000	814407	conserved+Plasmodium+protein%2C+unknown+function	17.4	15.9	26.5	60.7	61.5	42.8	2.1	420.3	81.8	729	1
PF3D7_0309200	chr3	389137	394604	-	395000	ARK2	serine%2Fthreonine+protein+kinase%2C+putative+%28ARK2%29	15.9	22.1	79.2	114.6	133.3	48.3	13.6	185.8	98.7	711.5	0
PF3D7_0309300	chr3	397649	400516	+	395000	814409	N2227-like+protein%2C+putative	95.5	50.1	62.1	58.7	52.9	55.2	22.3	60	43.7	500.5	0
PF3D7_0309500	chr3	402933	405440	+	405000	814410	asparagine+synthetase%2C+putative	130.5	83.3	150.2	122.7	88.5	54.3	140	27.3	40.9	837.7	0
PF3D7_0309600	chr3	407980	408318	+	405000	814411	60S+acidic+ribosomal+protein+P2%2C+putative	4097.9	3494.8	4739.6	3472.7	2884.1	1446.6	1940.4	1773.3	3275.5	27124.9	0
PF3D7_0309700	chr3	409102	410928	-	415000	SBP2	SECIS-binding+protein+2%2C+putative+%28SBP2%29	3.6	0	0	0	0.9	0	0	4.2	38.8	47.5	0
PF3D7_0309800	chr3	412089	413762	+	415000	814413	YT521-B-like+family+protein%2C+putative	31.7	9.7	27.3	13.5	19.5	6.3	19.8	18.4	103.8	250	0
PF3D7_0309900	chr3	414234	419673	-	415000	814414	conserved+Plasmodium+protein%2C+unknown+function	0	4.1	11.8	8.3	3.5	0	1.4	31.8	0	60.9	0
PF3D7_0310000	chr3	420697	421515	+	425000	814415	conserved+Plasmodium+protein%2C+unknown+function	0	10.1	16.8	11	20.7	0	10.2	129.6	10.8	209.2	1
PF3D7_0310100	chr3	422379	424680	+	425000	CDPK3	calcium+dependent+protein+kinase+3+%28CDPK3%29	15.7	12	8.6	14.4	17.3	20.7	65.7	39.4	96.4	290.2	0
PF3D7_0310200	chr3	427290	440942	+	435000	814417	phd+finger+protein%2C+putative	163.1	55.4	137.7	43.4	37.1	43.6	133.1	109.8	233.7	956.9	0
PF3D7_0310300	chr3	442720	446457	+	445000	C0H469	phosphoglycerate+mutase%2C+putative	78.7	52.1	102.7	52.4	24.7	11.3	11	131.8	72.3	537	0
PF3D7_0310400	chr3	447500	451384	+	445000	814419	parasite-infected+erythrocyte+surface+protein+%28PIESP1%29	14.2	10	87.5	404.6	453.7	337.8	15.8	231.4	59.4	1614.4	0
PF3D7_0310500	chr3	452297	459106	-	455000	814420	DEAD+box+helicase%2C+putative	31.5	18.7	68.1	51.2	49.3	6.3	0	43.4	2.8	271.3	0
PF3D7_0310600.1	chr3	461175	462027	-	465000	814421	SAC3%2FGNAP+family-related+protein%2C+putative	11.9	2.1	27.1	8.2	15	2.7	3.3	6.2	0	76.5	0
PF3D7_0310700	chr3	463326	464274	+	465000	814422	sybindin-like+protein%2C+putative	20.2	43	58.4	51.9	71.1	52.8	48.2	2.1	15.9	363.6	0
PF3D7_0310800	chr3	464662	464991	+	465000	814423	conserved+Plasmodium+protein%2C+unknown+function	4.6	16.6	31.9	9	78.5	15.3	16.4	0	2	174.3	0
PF3D7_0310900	chr3	466085	468445	+	465000	814424	conserved+Plasmodium+protein%2C+unknown+function	0	0	9.9	3.6	9.6	1.8	0	18.4	1.2	44.5	0
PF3D7_0311000	chr3	469287	470118	+	465000	814425	conserved+Plasmodium+protein%2C+unknown+function	0	1.5	0.2	17	10	0	0	22.8	6.9	58.4	0
PF3D7_0311100	chr3	470860	473161	-	475000	814426	pre-mRNA+splicing+factor%2C+putative	122.6	88.8	195.4	174.7	144.9	43.6	3.5	143.6	222.3	1139.4	0
PF3D7_0311200	chr3	474788	479086	+	475000	814427	valine-tRNA+ligase%2C+putative	22.8	14.7	34.6	19	17.1	12.7	5.8	10.7	79.8	217.2	0
PF3D7_0311300	chr3	480122	483453	-	485000	814428	phosphatidylinositol+3-+and+4-kinase%2C+putative	5.2	4.1	32.7	27.3	91.3	32.4	10.4	68.1	102.1	373.6	0
PF3D7_0311400	chr3	488804	496510	+	495000	814429	protein+kinase%2C+putative	1.1	9.8	13.6	5	9.1	16.4	2.7	112.2	33.5	203.4	1
PF3D7_0311500	chr3	497118	497363	-	495000	814430	conserved+Plasmodium+protein%2C+unknown+function	219.8	92.3	80.2	49.2	74.3	51.1	174.1	314.1	68.8	1123.9	0
PF3D7_0311600	chr3	499602	502353	+	505000	814431	conserved+Plasmodium+protein%2C+unknown+function	0	10.1	48.3	23.1	5.5	4.4	8.5	34.5	1.6	136	0
PF3D7_0311700	chr3	502698	505848	+	505000	814432	plasmepsin+VI	19.6	26.7	27.7	11.3	13.8	15.4	17.9	292.8	70.6	495.8	1
PF3D7_0311800	chr3	506655	508846	+	505000	814433	conserved+protein%2C+unknown+function	0	0	33.7	42.9	52.6	14.2	0	115.9	12.9	272.2	0
PF3D7_0311900	chr3	509291	511597	-	515000	814434	conserved+Plasmodium+protein%2C+unknown+function	24.6	41.7	44.6	46.2	50.3	43.6	37.7	56.8	67	412.5	0
PF3D7_0312000	chr3	512130	512951	+	515000	814435	conserved+Plasmodium+protein%2C+unknown+function	44.3	60.7	132.8	151.4	160	119.4	90.6	93	203.4	1055.6	0
PF3D7_0312100	chr3	513752	516262	+	515000	SCF	RING+zinc+finger+protein%2C+putative	0	2.4	93.1	209.2	291.2	92.1	10	321.9	197.9	1217.8	0
PF3D7_0312200	chr3	516793	520503	-	515000	814437	TPR+domain+containing+protein	0	0	5.9	11.4	33.6	5.9	0	23.5	0	80.3	0
PF3D7_0312300	chr3	521969	522883	+	525000	814438	26S+proteasome+regulatory+subunit+S14%2C+putative	19	21.8	38.7	33.9	42	29.1	0	30.2	0	214.7	0
PF3D7_0312400	chr3	524154	526439	-	525000	GSK3	glycogen+synthase+kinase+3+%28GSK3%29	11.1	102	517.5	530.8	506	317.6	14.9	1660.3	265	3925.2	0
PF3D7_0312500	chr3	529037	530776	+	525000	814440	transporter%2C+putative	36.8	17.7	49.4	19.8	34.2	6.9	10.3	27.8	32.2	235.1	0
PF3D7_0312800	chr3	534239	535238	+	535000	814443	60S+ribosomal+protein+L26%2C+putative	221.2	172.7	273.6	141.8	120.8	40.7	79.9	35	25.1	1110.8	0
PF3D7_0312900	chr3	536043	537274	+	535000	814444	hypothetical+protein	26.9	9.7	24.9	5	8.1	0	25	274.1	41.4	415.1	1
PF3D7_0313000	chr3	537621	538804	-	535000	814445	conserved+Plasmodium+protein%2C+unknown+function	28.1	0	34.4	15.2	4.6	9.3	0	24.3	0.7	116.6	0
PF3D7_0313100	chr3	539743	542810	+	545000	HRD3	ubiquitin-protein+ligase%2C+putative+%28HRD3%29	5.7	19.9	58.6	39	36.2	4	0	13	47	223.4	0
PF3D7_0313200	chr3	543241	543942	-	545000	814447	conserved+Plasmodium+protein%2C+unknown+function	16.9	17.7	98.2	140.6	125.4	52.4	0	399.6	90.5	941.3	0
PF3D7_0313400	chr3	545828	548182	-	545000	814448	conserved+Plasmodium+protein%2C+unknown+function	37.8	38.5	55.1	33.3	30	27.6	7.4	191.5	34.6	455.8	0
PF3D7_0313500	chr3	548718	551453	+	555000	814449	GTP-binding+protein+EngA%2C+putative	64.4	52.8	76.9	47.7	45.4	8.6	0	58	1.6	355.4	0
PF3D7_0313600	chr3	552001	554621	-	555000	814450	conserved+Plasmodium+protein%2C+unknown+function	13.4	16.7	49.5	62.9	52.1	7.5	14.2	304.1	13.9	534.3	0
PF3D7_0313700.1	chr3	555035	558684	-	555000	814451	conserved+Plasmodium+protein%2C+unknown+function	5.2	9.7	87.9	71.7	84.9	32.3	3.9	36.2	51.6	383.4	0
PF3D7_0313800	chr3	559334	562253	+	565000	C0H472	conserved+Plasmodium+protein%2C+unknown+function	0	0.9	16.3	0	9.3	0	0	2	0	28.5	0
PF3D7_0313900	chr3	562366	565656	-	565000	814453	conserved+Plasmodium+protein%2C+unknown+function	1	0	8.8	11.9	23.3	0.9	0	52.8	23.7	122.4	0
PF3D7_0314000	chr3	567247	568850	+	565000	P23	co-chaperone+p23+%28P23%29	65.4	96	330.5	498.3	854.4	562.2	26.6	1814.9	95.8	4344.1	0
PF3D7_0314100.1	chr3	569308	571051	-	575000	COPI	vesicle+transport+v-SNARE+protein%2C+putative	33.5	11.3	61.9	18.9	22.7	35.9	39.8	36.9	59.8	320.7	0
PF3D7_0314300	chr3	577008	578366	-	575000	Der1-2	DER1-like+protein+%28Der1-2%29	0	0	76.5	53.3	43.7	11	0.6	8.7	0	193.8	0
PF3D7_0314400	chr3	579539	580465	-	585000	134683	serine%2Fthreonine+protein+phosphatase%2C+putative	213.4	116.2	141.2	93.7	44.9	27.7	29.9	66.2	65.2	798.4	0
PF3D7_0314500	chr3	584226	585168	+	585000	814458	conserved+Plasmodium+protein%2C+unknown+function	91.6	51.4	89.1	41.9	43.2	9.3	8.8	8.1	1.3	344.7	0
PF3D7_0314600	chr3	586555	587331	+	585000	814459	conserved+Plasmodium+protein%2C+unknown+function	6.9	0	18.3	33.1	16	16.7	0	21.2	66.5	178.7	0
PF3D7_0314700	chr3	589002	592547	-	595000	814460	zinc+finger+protein%2C+putative	6.2	8.1	27.8	27	50.1	12	14.2	18.8	44.8	209	0
PF3D7_0314800	chr3	604595	607931	+	605000	C0H475	conserved+Plasmodium+protein%2C+unknown+function	0.4	0	0	3.3	1.4	0	0	0	4	9.1	0
PF3D7_0314900	chr3	608883	610718	+	605000	814462	conserved+Plasmodium+membrane+protein%2C+unknown+function	1.6	0	0	2.7	8.1	0	0	12.8	9.6	34.8	0
PF3D7_0315000	chr3	611334	612014	+	615000	814463	zinc+finger+protein%2C+putative	0	0	17.5	25.1	17.1	0	33.5	26.9	15.9	136	0
PF3D7_0315100	chr3	612739	613422	-	615000	eIF4E	translation+initiation+factor+4E+%28eIF4E%29	128.7	119.2	144.5	110.4	89.2	50	142	29.1	16.8	829.9	0
PF3D7_0315200	chr3	616472	622816	+	615000	CTRP	circumsporozoite-+and+TRAP-related+protein+%28CTRP%29	48.8	26.3	25.2	18.9	43.7	30.2	50.5	217.1	115.2	575.9	0
PF3D7_0315300	chr3	623446	630178	+	625000	814467	conserved+Plasmodium+protein%2C+unknown+function	5.2	0	11	0	24.1	0	0	1.7	8.5	50.5	0
PF3D7_0315400	chr3	630611	631381	-	635000	814468	conserved+Plasmodium+protein%2C+unknown+function	18.3	32.6	200.8	198.9	210.4	138.2	15.6	183	28.3	1026.1	0
PF3D7_0315500	chr3	632846	633544	-	635000	814469	mitochondrial+ribosomal+protein+L29%2FL47+precursor%2C+putative	0	0	18.4	7.4	20.8	0	0	23.3	0	69.9	0
PF3D7_0315600	chr3	635586	637462	+	635000	814470	conserved+Plasmodium+protein%2C+unknown+function	6.1	10.2	11.9	18.6	13.6	12.2	11.2	40.7	26.6	151.1	0
PF3D7_0315700	chr3	638283	641306	+	635000	814471	conserved+Plasmodium+membrane+protein%2C+unknown+function	17.3	10.8	13.4	10.9	33.1	16.3	0	160	40.5	302.3	0
PF3D7_0315800	chr3	641482	642579	-	645000	814472	zinc+finger+protein%2C+putative	69	60.3	76.2	55.4	56	44	49.4	23.5	99.3	533.1	0
PF3D7_0315900	chr3	644186	645268	+	645000	814473	conserved+Plasmodium+protein%2C+unknown+function	0	0	0	0	0	13.5	0	0	17.9	31.4	0
PF3D7_0316000	chr3	645921	646844	-	645000	814474	conserved+Plasmodium+protein%2C+unknown+function	0.6	0	1.1	0.4	40.8	68.3	9	147.1	48.6	315.9	0
PF3D7_0316100	chr3	648635	649531	+	645000	814475	mitochondrial+ribosomal+protein+L27+precursor%2C+putative	6.1	0	26.7	26.2	20.3	51.7	23.8	180.8	55	390.6	0
PF3D7_0316200	chr3	649849	657247	-	655000	814476	conserved+Plasmodium+protein%2C+unknown+function	0	9.8	30.7	24.4	69.8	20.7	0	74.8	45.2	275.4	0
PF3D7_0316300.2	chr3	658272	661643	+	655000	PFC0710w	inorganic+pyrophosphatase%2C+putative	23.9	95.1	705.3	986.1	1430.6	826	4.7	1426.6	756.8	6255.1	0
PF3D7_0316400	chr3	662126	665152	-	665000	814478	conserved+Plasmodium+protein%2C+unknown+function	0	1.9	2.8	0	0	0	0	0	0	4.7	0
PF3D7_0316500	chr3	667006	668391	+	665000	814479	conserved+Plasmodium+protein%2C+unknown+function	0	0	8.5	11.6	35.4	24.7	0	16.9	0	97.1	0
PF3D7_0316600	chr3	669302	670873	-	675000	814480	formate-nitrite+transporter%2C+putative	395.2	298.2	455.4	370.5	322.9	149.2	26.9	126	495.5	2639.8	0
PF3D7_0316700	chr3	674458	675636	+	675000	814481	HVA22%2FTB2%2FDP1+family+protein%2C+putative	72.1	104	106	200.2	157.2	161.1	5.1	36.3	176.9	1018.9	0
PF3D7_0316800	chr3	677842	678474	+	675000	814482	40S+ribosomal+protein+S15A%2C+putative	1339.7	1194.5	1543.4	903.5	862	439.2	744.5	491.9	234.1	7752.8	0
PF3D7_0316900	chr3	679234	681277	-	685000	814483	RING+zinc+finger+protein%2C+putative	207.7	141.6	170.5	134.3	203.3	227.8	124.9	269.2	86.2	1565.5	0
PF3D7_0317000	chr3	682795	683685	-	685000	814484	proteasome+component+C8%2C+putative	118.1	151.9	663	391.1	456.5	161.1	6.2	269.1	115.4	2332.4	0
PF3D7_0317100	chr3	686282	689482	+	685000	C0H478	conserved+Plasmodium+protein%2C+unknown+function	16	15.9	32.4	32.8	36.1	51.9	17.3	69	726.5	997.9	1
PF3D7_0317200	chr3	690154	694815	-	695000	CRK4	cdc2-related+protein+kinase+4+%28CRK4%29	7.6	16.8	113.6	261.9	353	147.9	5.6	32.5	25.5	964.4	0
PF3D7_0317300	chr3	699544	709728	-	705000	814487	conserved+Plasmodium+protein%2C+unknown+function	73.1	35.4	87.4	57.9	107	27.1	17.2	44.5	59.7	509.3	0
PF3D7_0317400	chr3	712253	714082	-	715000	814488	conserved+Plasmodium+protein%2C+unknown+function	1.1	23.1	26.3	14.5	36.1	10.7	23.5	33	41.8	210.1	0
PF3D7_0317500	chr3	716523	721831	-	715000	814489	kinesin-like+protein%2C+putative	11.4	19.5	57.3	73.2	75.1	28.7	0	38.9	48.8	352.9	0
PF3D7_0317600	chr3	725015	726130	+	725000	814490	40S+ribosomal+protein+S11%2C+putative	144.1	325.3	250.9	193.6	174	94.9	78.3	63.2	66.5	1390.8	0
PF3D7_0317700	chr3	728259	738076	+	735000	814491	CPSF+%28cleavage+and+polyadenylation+specific+factor%29%2C+subunit+A%2C+putative	33.1	40.7	75.1	58.4	38.1	20.7	16.1	21.3	11.8	315.3	0
PF3D7_0317800	chr3	738205	738882	-	735000	814492	proteasome+regulatory+protein%2C+putative	126	79.3	190.8	117.1	105.3	27.3	13.4	22.7	12.4	694.3	0
PF3D7_0317900	chr3	739428	741733	+	745000	C0H479	conserved+Plasmodium+protein%2C+unknown+function	8.9	15.6	21.7	37.6	15.8	0	3.2	18.4	13.8	135	0
PF3D7_0318000	chr3	742191	742799	+	745000	814494	conserved+Plasmodium+protein%2C+unknown+function	3.2	0	0	0	0	0	10.3	697.2	0	710.7	1
PF3D7_0318100	chr3	743929	745053	+	745000	814495	band+7-related+protein	12.9	17.7	36.1	20.5	2.8	2.7	7.1	2.8	9.2	111.8	0
PF3D7_0318200	chr3	748465	755838	+	755000	814496	DNA-directed+RNA+polymerase+II%2C+putative	1336.8	1405.1	1483.9	996.9	979	381.5	336	478.6	1137.7	8535.5	0
PF3D7_0318300	chr3	756491	760292	-	755000	814497	conserved+Plasmodium+protein%2C+unknown+function	132.3	34.2	100.2	57	64.3	32.8	17	125.5	84.2	647.5	0
PF3D7_0318400	chr3	761693	765439	-	765000	814498	conserved+Plasmodium+protein%2C+unknown+function	3	0	1.9	0	0	5.4	0	3.2	0	13.5	0
PF3D7_0318500	chr3	767815	782760	+	775000	814499	conserved+Plasmodium+protein%2C+unknown+function	0	0	0	2.5	12.6	0	0	18.6	16.2	49.9	0
PF3D7_0318600	chr3	783112	786165	-	785000	814500	cleavage+and+polyadenylation+specifity+factor%2C+putative	133.2	75	94.6	50.5	52.2	55.6	40.1	57.2	19.4	577.8	0
PF3D7_0318700	chr3	788453	788812	+	785000	814501	trophozoite+stage+antigen	19.9	9.4	0	0	53.9	244.8	56.6	1.2	28.2	414	0
PF3D7_0318800	chr3	789858	791308	+	795000	2589	triosephophate+isomerase%2C+putative	0	0	0	1.5	0	6.5	1.2	0	0	9.2	0
PF3D7_0318900	chr3	791840	793481	-	795000	814503	conserved+protein%2C+unknown+function	119.6	41.3	126.6	159.4	116.8	48.5	0	90.8	27.6	730.6	0
PF3D7_0319000	chr3	795577	801171	+	795000	PPM	P-type+ATPase%2C+putative+%28ATPase7%29	8.3	11	75.6	101.5	120.1	68.1	0	91.2	12.9	488.7	0
PF3D7_0319100	chr3	802260	802583	-	805000	SCF	ubiquitin-protein+ligase%2C+putative	22.9	37.1	128.8	111.2	146.5	64.7	4	548.2	122.4	1185.8	0
PF3D7_0319200	chr3	803592	806312	-	805000	CCR4	endonuclease%2Fexonuclease%2Fphosphatase+family+protein%2C+putative	92.3	86.7	176.8	113.3	91.1	34.3	5.7	105.6	69.2	775	0
PF3D7_0319300	chr3	807277	807859	+	805000	814507	ubiquitin+conjugating+enzyme%2C+putative	115.2	143.4	132.1	167	140.9	101.3	130.4	137.1	118	1185.4	0
PF3D7_0319400	chr3	810081	814172	+	815000	814508	kinesin%2C+putative	3.6	6.2	119.6	322.9	359.5	179.6	3	576.8	118.6	1689.8	0
PF3D7_0319500	chr3	815569	816855	+	815000	814509	RNA+binding+protein%2C+putative	76.7	59.1	112.3	91.8	85.7	15.3	8	72.3	17.9	539.1	0
PF3D7_0319600	chr3	817913	818695	+	815000	814510	elongation+factor+1+%28EF-1%29%2C+putative	257.8	135.7	286.1	191.5	105.3	54.6	37.1	137.5	32.4	1238	0
PF3D7_0319700	chr3	820708	830802	+	825000	814511	ABC+transporter%2C+putative	58.6	12.2	41.3	6.8	15.1	1.1	6.8	31.5	20.2	193.6	0
PF3D7_0319800	chr3	831076	832509	-	835000	814512	conserved+Plasmodium+protein%2C+unknown+function	1.9	0	8.9	0	0	0	0	85.3	0	96.1	1
PF3D7_0319900	chr3	833833	834777	-	835000	814513	conserved+Plasmodium+protein%2C+unknown+function	145	134.2	95.7	99.5	110.1	92	35.1	104.3	78.3	894.2	0
PF3D7_0320000	chr3	837307	838271	+	835000	814514	conserved+Plasmodium+protein%2C+unknown+function	0	0	0	0	27.1	0	0	4.7	3	34.8	0
PF3D7_0320100	chr3	840362	841758	+	845000	COPI	SNARE+protein+%28SEC22%29	91.5	36.7	77.6	110	133.3	50.4	8	157.2	118.6	783.3	0
PF3D7_0320200	chr3	842539	844290	+	845000	C0H481	CPW-WPC+family+protein	1.8	14.4	30.7	10	23.3	12.4	19.5	1688.2	28.3	1828.6	1
PF3D7_0320300	chr3	845713	847320	+	845000	814517	T-complex+protein+1+epsilon+subunit%2C+putative	213.8	216.1	438.9	252.1	169.4	56.8	34.1	135.3	167.6	1684.1	0
PF3D7_0320400	chr3	848247	857504	-	855000	814518	oocyst+capsule+protein+%28Cap380%29	0	0	2	0	6.2	5.3	0	11.9	9	34.4	0
PF3D7_0320500	chr3	860813	862102	+	865000	814519	conserved+Plasmodium+protein%2C+unknown+function	16.5	91.1	102.3	81.9	138.4	24.1	0	82.6	19.9	556.8	0
PF3D7_0320600	chr3	862741	863832	-	865000	814520	conserved+Plasmodium+protein%2C+unknown+function	0	1.8	68.9	93.8	63.9	50.8	0	268.2	38.5	585.9	0
PF3D7_0320700	chr3	865014	866420	+	865000	SPC2	signal+peptidase+complex+subunit+2%2C+putative+%28SPC2%29	0	13.4	179.1	268.5	257.9	118.6	0	355.1	38.5	1231.1	0
PF3D7_0320800	chr3	870817	872342	+	875000	CCR4	ATP-dependent+RNA+helicase%2C+putative+%28DOZI%29	7.6	121.3	547.3	436	583.2	170.9	0	1413.7	459.7	3739.7	0
PF3D7_0320900	chr3	875213	876295	+	875000	H2A.Z	histone+H2A+variant%2C+putative+%28H2A.Z%29	262.2	207.7	291.5	480.8	591.8	776.1	128.9	95.2	45.2	2879.4	0
PF3D7_0321000	chr3	877735	879511	+	875000	814524	conserved+Plasmodium+protein%2C+unknown+function	159.8	118.9	216.7	186	149.2	38.3	4.9	140	54	1067.8	0
PF3D7_0321100	chr3	879959	885493	-	885000	814525	conserved+Plasmodium+protein%2C+unknown+function	4.3	10.1	19.4	67.9	159.9	173	3.7	12	15.6	465.9	0
PF3D7_0321200	chr3	886962	888976	-	885000	814526	N-acetylglucosamine-1-phosphate+transferase%2C+putative	11.5	41.2	105.6	111.8	181.1	110	24.3	151.2	63.4	800.1	0
PF3D7_0321300	chr3	890014	892764	-	895000	814527	conserved+Plasmodium+protein%2C+unknown+function	0	0	0	13.9	0	0	0	34	21.6	69.5	1
PF3D7_0321400	chr3	894761	896112	+	895000	C0H482	protein+kinase%2C+putative	4.7	0	1.2	3.7	39.1	16	10.6	30.1	5.5	110.9	0
PF3D7_0321500	chr3	896546	899770	-	895000	814529	peptidase%2C+putative	44.6	160.2	363	408.4	427.7	224.2	42.7	694	130.3	2495.1	0
PF3D7_0321600	chr3	900857	903369	+	905000	814530	ATP-dependent+RNA+helicase%2C+putative	63.1	67.1	217.3	211.7	195.7	73.3	2.9	186.4	4.8	1022.3	0
PF3D7_0321700	chr3	903764	910118	-	905000	814531	microtubule+and+actin+binding+protein%2C+putative	0	0	0	0	0	0.4	0	0	0	0.4	0
PF3D7_0321800	chr3	912916	921036	+	915000	814532	conserved+Plasmodium+protein%2C+unknown+function	79.8	32	82.7	37.8	53	32.5	3.1	38.6	19.9	379.4	0
PF3D7_0321900	chr3	922974	927942	+	925000	C0H483	cyclic+amine+resistance+locus+protein	288.1	160.5	235.6	278.3	336.2	217	64.6	286.3	130.6	1997.2	0
PF3D7_0322000	chr3	928644	929159	-	925000	2534	peptidyl-prolyl+cis-trans+isomerase+%28CYP19A%29	663.7	447.8	1128.5	593.7	415.8	170.5	60	113.2	38	3631.2	0
PF3D7_0322100	chr3	930640	932415	-	935000	Prt1	RNA+triphosphatase+%28Prt1%29	98.9	14.8	57.5	24.9	41.9	5.4	0	27.8	0.3	271.5	0
PF3D7_0322200	chr3	933188	937006	-	935000	814536	conserved+Plasmodium+protein%2C+unknown+function	0	0	0	0	0	0	0	4	0	4	0
PF3D7_0322300	chr3	938212	940173	-	935000	814537	acyl+CoA%3Adiacylglycerol+acyltransferase%2C+putative	50	56.1	153.6	356.6	411.7	229.6	5.8	126.6	50	1440	0
PF3D7_0322400	chr3	942545	945301	+	945000	C0H485	regulator+of+initiation+factor+2+%28eIF2%29	51.6	27.7	62.1	38.6	48.5	16.1	0	68.7	113.2	426.5	0
PF3D7_0322500	chr3	945537	946751	-	945000	814539	iron-sulfur+cluster+assembly+accessory+protein%2C+putative	0	0	56.6	46.1	60	21.8	0	58.2	193.3	436	0
PF3D7_0322600	chr3	948374	952693	+	955000	814540	conserved+Plasmodium+protein%2C+unknown+function	0	0	0	0	0	0	1	19.5	0	20.5	0
PF3D7_0322700	chr3	952964	962367	-	955000	814541	conserved+Plasmodium+protein%2C+unknown+function	69.8	41.7	80.5	59.6	59.1	9.3	0	30.3	0	350.3	0
PF3D7_0322800	chr3	964101	965203	+	965000	814543	conserved+Plasmodium+protein%2C+unknown+function	0	0	0	0	0	0	0	0	0	0	0
PF3D7_0322900	chr3	965553	966502	-	965000	814544	40S+ribosomal+protein+S3A%2C+putative	147.7	121.8	131.3	96.7	112.7	26.4	26.1	11.3	25.4	699.4	0
PF3D7_0323000	chr3	968675	969202	-	965000	814545	conserved+Plasmodium+protein%2C+unknown+function	71.7	81.5	149.8	135.8	150.9	18.5	0	428.1	0	1036.3	0
PF3D7_0323100	chr3	971166	975794	+	975000	814546	conserved+Plasmodium+protein%2C+unknown+function	10.5	8.1	14.3	7.5	20.5	6.3	10.3	13.1	0.8	91.4	0
PF3D7_0323200	chr3	976870	978195	+	975000	814547	conserved+Plasmodium+protein%2C+unknown+function	12.5	56	123.4	157.4	155.7	86.2	16.6	257.3	100.7	965.8	0
PF3D7_0323300	chr3	978970	980271	+	975000	814548	conserved+Plasmodium+protein%2C+unknown+function	0	3.9	6.3	21.3	27.7	11.2	4.9	132.7	33.1	241.1	1
PF3D7_0323400	chr3	980706	983966	-	985000	RIPR	Rh5+interacting+protein+%28RIPR%29	0	0	0	2.5	28.7	52.5	0	25.8	17.4	126.9	0
PF3D7_0323500	chr3	986265	987610	+	985000	814550	survival+of+motor+neuron+%28SMN%29-like+protein	29.8	16.7	45.9	37.1	47.4	53.3	8	26.1	68.2	332.5	0
PF3D7_0323600	chr3	988631	990882	+	985000	814551	conserved+Plasmodium+protein%2C+unknown+function	1.4	0	1.7	1	9.2	0	0	0	0	13.3	0
PF3D7_0323700	chr3	991544	993625	-	995000	SART1	U4%2FU6.U5+tri-snRNP-associated+protein+1%2C+putative+%28SART1%29	51.1	37.6	56.2	41.3	50.3	42.9	16.2	28.1	93.2	416.9	0
PF3D7_0323800	chr3	998649	1001582	+	1005000	814553	conserved+Plasmodium+protein%2C+unknown+function	22.4	0	16.4	1.7	7.7	0	0	75.9	0	124.1	0
PF3D7_0323900	chr3	1002872	1004267	-	1005000	9221785	erythrocyte+membrane+protein+1+%28PfEMP1%29%2C+exon2%2C+pseudogene+%28VAR+pseudogene%29	0	0	0	5	0	0	0	0	0	5	0
PF3D7_0324100	chr3	1007413	1008202	-	1005000	814556	Pfmc-2TM+Maurer%27s+cleft+two+transmembrane+protein+%28MC-2TM%29	38.3	86.8	73.5	84.9	73.4	37.1	79.3	69.7	56.8	599.8	0
PF3D7_0324400	chr3	1015795	1016942	+	1015000	RIF	rifin+%283D7-rifT3-5%29+%28RIF%29	7	18.8	9	3.8	7.4	2.4	13.5	12.5	24.4	98.8	0
PF3D7_0324500	chr3	1018874	1019973	+	1015000	RIF	rifin+%28RIF%29	3.5	6.3	16.1	10.5	0	7.3	10.2	2.9	42	98.8	1
PF3D7_0324600	chr3	1021998	1023008	+	1025000	814561	stevor+%283D7-stevorT3-2%29+%28stevor%29	0	19	26.4	7	15.3	28.5	22.6	22.3	85.8	226.9	0
PF3D7_0324700	chr3	1024030	1025411	+	1025000	814562	erythrocyte+membrane+protein+1+%28PfEMP1%29%2C+exon2%2C+pseudogene+%28VAR+pseudogene%29	2.1	4.2	26.8	31.2	48.9	24.2	0	57.4	22	216.8	0
PF3D7_0324800	chr3	1027571	1028929	+	1025000	814563	rifin+%28rifin+%283D7-rifT3-7%29%29	24.6	36.1	45.7	29.1	25	13.1	24.8	59.2	138.2	395.8	0
PF3D7_0324900	chr3	1030822	1038254	-	1035000	VAR	erythrocyte+membrane+protein+1%2C+PfEMP1+%28VAR%29	150.7	179.5	186.5	188.7	199.7	233.2	145.9	195.7	294.1	1774	0
PF3D7_0400100	chr4	28706	37677	+	35000	VAR	erythrocyte+membrane+protein+1%2C+PfEMP1+%28VAR%29	61.3	97.3	62.6	44.1	30.9	52.8	63.2	55.1	111.6	578.9	0
PF3D7_0400300	chr4	42032	43374	-	45000	RIF	rifin+%28RIF%29	0	7	0	1.4	9.9	4.9	3.8	13.8	34.5	75.3	1
PF3D7_0400400	chr4	45555	56860	-	55000	VAR	erythrocyte+membrane+protein+1%2C+PfEMP1+%28VAR%29	63.7	55.6	44.6	21.5	34.8	49.9	43.6	49.2	104.8	467.7	0
PF3D7_0400500	chr4	59636	60939	+	65000	RIF	rifin+%28RIF%29	14.9	21.8	13	12.9	35	20.1	24.7	15.2	49.1	206.7	0
PF3D7_0400700	chr4	63104	64476	-	65000	RIF	rifin+%28RIF%29	15.2	5.2	4.7	14.3	9.8	6	13.2	16.3	79.3	164	1
PF3D7_0400800	chr4	66601	67573	-	65000	812539	stevor	17	28.6	40.5	32	12.5	14.6	45.2	53.8	107.8	352	0
PF3D7_0400900	chr4	69961	71113	-	75000	RIF	rifin+%28RIF%29	2.6	19.2	17.8	11.8	2.2	14.2	20	13.2	67.5	168.5	0
PF3D7_0401000	chr4	73268	74340	-	75000	RIF	rifin+%28RIF%29	7.8	23.5	14.3	19.5	22.1	26.6	58.9	27.5	118.7	318.9	1
PF3D7_0401200	chr4	79193	80451	+	75000	RIF	rifin+%28RIF%29	4	7.6	12.5	4.2	18.8	0	3.4	17.4	21.8	89.7	0
PF3D7_0401300	chr4	82247	83575	+	85000	RIF	rifin+%28RIF%29	3.4	2.6	8.9	0	3.3	1.2	8.3	8.4	35.5	71.6	0
PF3D7_0401400	chr4	85397	86608	+	85000	RIF	rifin+%28RIF%29	11	5.7	6	9.4	3.4	4.2	17.2	24.5	56.4	137.8	1
PF3D7_0401500	chr4	89153	90184	+	85000	812535	stevor%2C+pseudogene	1.5	9.9	11	8.5	9.7	21.1	25.1	29.3	107.5	223.6	0
PF3D7_0401600.1	chr4	92576	93809	-	95000	RIF	rifin+%28RIF%29	420	747.7	824.5	481	283.5	224.5	183.1	11.8	37.3	3213.4	0
PF3D7_0401700	chr4	100684	102110	+	105000	812533	Plasmodium+exported+protein%2C+unknown+function%2C+pseudogene	1.1	70.2	95.6	54.3	18.1	7.4	4.8	11.9	23.6	287	0
PF3D7_0401800	chr4	103742	105603	-	105000	PfD80	Plasmodium+exported+protein+%28PHISTb%29%2C+unknown+function+%28PfD80%29	66.4	246.5	184.6	7.5	26.7	9.2	1.1	0	0	542	0
PF3D7_0401900	chr4	108380	111295	-	105000	ACS6	acyl-CoA+synthetase+%28ACS6%29	15.5	0	1	0	0	0	32.5	1.1	17.5	67.6	0
PF3D7_0402000	chr4	114601	116058	-	115000	812529	Plasmodium+exported+protein+%28PHISTa%29%2C+unknown+function	117.8	718	1613.1	519	491.7	77.8	6.3	1.2	15.6	3560.5	0
PF3D7_0402100	chr4	123588	125464	-	125000	812530	Plasmodium+exported+protein+%28PHISTb%29%2C+unknown+function	63.6	4.4	0.7	0.7	2.4	28.4	175.1	0	0.1	275.4	0
PF3D7_0402200	chr4	127712	134468	-	135000	812527	surface-associated+interspersed+gene+4.1%2C+pseudogene+%28SURFIN4.1%29+%28SURF4.1%29	20.2	9.8	3.6	7.3	108.7	170.3	30.1	4.8	12.4	367.2	0
PF3D7_0402300	chr4	137640	146653	+	145000	RH1	normocyte+binding+protein+1%2Creticulocyte+binding+protein+homologue+1+%28RH1%29	8	0	0	0	44.8	151.2	2.8	0	0	206.8	0
PF3D7_0402400	chr4	147490	148380	-	145000	812508	Plasmodium+exported+protein%2C+unknown+function+%28GEXP18%29	257.2	244.1	404.7	226.6	275	152.5	291	153.4	102	2106.5	0
PF3D7_0402500	chr4	155877	156984	+	155000	812507	rifin%2C+pseudogene	3.6	0	1.9	0	18.9	0	10.1	10.9	5.6	51	0
PF3D7_0402600	chr4	159279	160314	-	155000	812506	stevor	7.6	3	12.1	10.3	5.1	12.6	23.5	6.5	38.6	119.3	0
PF3D7_0403100	chr4	175372	177252	-	175000	812589	regulator+of+chromosome+condensation%2C+putative	2.2	0	15.8	6.3	5.9	3.8	12.6	24.4	33.6	104.6	0
PF3D7_0403200	chr4	178518	180200	+	175000	812590	conserved+Plasmodium+protein%2C+unknown+function	49.5	19.8	67.5	17.1	18.9	5.7	1.2	25.1	0	204.8	0
PF3D7_0403300	chr4	180430	181551	-	185000	812496	conserved+Plasmodium+protein%2C+unknown+function	16.4	10.1	33.5	25.5	30.3	0	14.2	23.3	0	153.3	0
PF3D7_0403400	chr4	182870	194712	+	185000	812491	conserved+Plasmodium+protein%2C+unknown+function	98.9	64.2	92.7	74.8	88.8	46.6	31	71	42.7	610.7	0
PF3D7_0403500	chr4	195543	196745	+	195000	812487	ubiquitin+specific+protease%2C+putative	13.6	7.2	48.1	36.7	46.8	7.3	0	10.4	103.6	273.7	0
PF3D7_0403600	chr4	197846	201208	-	195000	812481	conserved+Plasmodium+protein%2C+unknown+function	0	2.9	127.5	157.4	246.6	85.5	0	218.5	9.9	848.3	0
PF3D7_0403700	chr4	206228	209394	-	205000	812468	CGI-201+protein%2C+short+form	476.1	413.3	578.2	385.3	301.5	150.2	47.9	197.1	109.2	2658.8	0
PF3D7_0403800	chr4	211650	213854	-	215000	812465	conserved+Plasmodium+protein%2C+unknown+function	25.8	4.8	7.3	17.1	64.3	98	50.3	251.3	85.4	604.3	0
PF3D7_0403900	chr4	219087	222838	+	225000	SET8	SET+domain+protein%2C+putative+%28SET8%29	0	0	8.2	22.9	87.8	71.5	0.7	39.3	30.6	261	0
PF3D7_0404000	chr4	223711	224131	-	225000	812461	conserved+Plasmodium+protein%2C+unknown+function	0	0	0	0	74.3	58.1	0	333.2	176.8	642.4	0
PF3D7_0404100	chr4	224779	231733	-	225000	812462	transcription+factor+with+AP2+domain%28s%29%2C+putative+%28ApiAP2%29	0	0	0	0	0	0	0	0	0	0	0
PF3D7_0404200	chr4	232595	233249	-	235000	812455	conserved+Plasmodium+protein%2C+unknown+function	11.6	2.3	4.4	15.9	16.1	0	1.3	42.1	17.7	111.4	0
PF3D7_0404400	chr4	238360	239499	-	235000	P36	6-cysteine+protein+%28P36%29	92.6	57.7	81.1	57.7	74.6	67.4	10.5	47.8	94.5	583.9	0
PF3D7_0404500	chr4	240911	242347	-	245000	P52	6-cysteine+protein+%28P52%29	7.2	0	0	7	11.2	10.7	0	19.6	792.1	847.8	1
PF3D7_0404600	chr4	247731	260147	+	255000	812451	conserved+Plasmodium+membrane+protein%2C+unknown+function	11.7	9.1	4.3	0	7	0	0.6	17.2	362.9	412.8	0
PF3D7_0404700	chr4	260454	263418	-	265000	DPAP3	dipeptidyl+peptidase+3+%28DPAP3%29	0	0	0	8.8	45.4	28.6	0	0	8.6	91.4	0
PF3D7_0404800	chr4	264305	266170	-	265000	812444	conserved+Plasmodium+protein%2C+unknown+function	0	0	0	0	0	0	0	2	118.8	120.8	1
PF3D7_0404900	chr4	267244	268380	-	265000	P41	6-cysteine+protein+%28P41%29	32.9	11.4	34.2	168.4	654.5	461.3	11.5	33.8	198.7	1606.7	0
PF3D7_0405000	chr4	268960	271134	-	275000	812448	ATP-dependent+RNA+helicase%2C+putative	125.8	95.6	165.3	67.3	76.8	41.4	2.1	333.8	55.1	963.2	0
PF3D7_0405100	chr4	272255	276824	-	275000	COPII	Sec24+subunit+b+%28SEC24b%29	78.5	42.3	142.8	111.8	142.4	127.5	13	48.2	50.1	756.6	0
PF3D7_0405200	chr4	279072	281983	+	285000	812431	ag-1+blood+stage+membrane+protein+homologue+%28PfMAg-1%29	15.4	4.3	54	81.9	240.4	184	0	278	13.7	871.7	0
PF3D7_0405300	chr4	282403	288297	-	285000	812430	sequestrin	8.2	5.4	2.8	10.3	5.2	7.3	15.1	42.5	47.7	144.5	0
PF3D7_0405400	chr4	291251	300976	+	295000	PRPF8	pre-mRNA-processing-splicing+factor+8%2C+putative+%28PRPF8%29	513.6	325.7	532.2	448.8	452.7	221.3	65.3	256.9	295.2	3111.7	0
PF3D7_0405500	chr4	301259	302267	-	305000	812423	conserved+Plasmodium+protein%2C+unknown+function	3.4	18.4	15.8	20.4	0	0	0	31.1	13.2	102.3	0
PF3D7_0405600	chr4	303329	305343	+	305000	812422	conserved+Plasmodium+membrane+protein%2C+unknown+function	267.2	371.2	614.4	469.2	377.9	179.6	58.7	291.3	63.2	2692.7	0
PF3D7_0405700	chr4	305746	312993	-	305000	812417	lysine+decarboxylase%2C+putative	19.3	20.3	29.8	23.1	59.7	6.2	0	55.4	152.8	366.6	0
PF3D7_0405800	chr4	315562	315870	+	315000	812413	conserved+Plasmodium+protein%2C+unknown+function	9.4	0	0	0	0	0	0	0	6.2	15.6	0
PF3D7_0405900	chr4	316540	319178	-	315000	ASP	apical+sushi+protein+%28ASP%29	2.9	0	0	15.1	211.8	239	0	11.9	19.9	500.6	0
PF3D7_0406000	chr4	321019	322545	+	325000	812408	conserved+Plasmodium+protein%2C+unknown+function	27.7	13.5	41.6	21.2	74.5	26.8	0	28.8	65.9	300	0
PF3D7_0406100	chr4	323267	325225	-	325000	PPM	vacuolar+ATP+synthase+subunit+b	337.2	201.8	454	297.5	356.6	217.8	12.9	169.6	52.5	2099.9	0
PF3D7_0406200	chr4	329216	329689	+	325000	Pfs16	sexual+stage-specific+protein+precursor+%28Pfs16%29	953.2	1108.2	1134.9	958.5	979.8	812.2	1569.8	8664.8	342.8	16524.2	1
PF3D7_0406500	chr4	334282	344054	-	335000	812391	conserved+Plasmodium+protein%2C+unknown+function	420.4	96.6	186.3	56.5	224.8	144	37.7	150	341.1	1657.4	0
PF3D7_0406600	chr4	346308	346727	+	345000	812386	conserved+Plasmodium+protein%2C+unknown+function	0	33	71.4	49	45.9	21	37.5	121.4	91.8	471	0
PF3D7_0406700	chr4	347458	351499	+	345000	812384	conserved+Plasmodium+protein%2C+unknown+function	0	0	0	26.6	16.4	6.7	0	4.3	0	54	0
PF3D7_0406800	chr4	351527	352983	-	355000	812373	conserved+Plasmodium+protein%2C+unknown+function	4.4	5.7	24.4	49.7	20.4	13.7	9	75.9	20.1	223.3	0
PF3D7_0406900	chr4	353655	359878	-	355000	C0H493	conserved+Plasmodium+protein%2C+unknown+function	0	0	2.7	7.1	8.4	2.9	0	573.5	24.1	618.7	1
PF3D7_0407000	chr4	360547	361764	-	365000	812371	conserved+Plasmodium+protein%2C+unknown+function	0	0	0	0	0	0	0	6.8	0	6.8	0
PF3D7_0407100	chr4	362301	363442	+	365000	812372	conserved+Plasmodium+protein%2C+unknown+function	0	0	6.4	3.1	0	0	0	0	2.1	11.6	0
PF3D7_0407200	chr4	363599	364933	-	365000	812370	peptidyl-tRNA+hydrolase+PTH2%2C+putative	537.5	425.9	553.5	452.4	351.6	302.3	234.2	1132.3	113.7	4103.4	0
PF3D7_0407300	chr4	366379	367341	+	365000	812367	transcription+factor%2C+putative	0	0	0	0	0	5.9	7	10.2	2.5	25.6	0
PF3D7_0407400	chr4	367845	368153	-	365000	812368	conserved+Plasmodium+protein%2C+unknown+function	68.8	109.8	264.4	160.5	99.1	22.7	8.9	349.7	500.6	1584.5	0
PF3D7_0407500	chr4	369885	371270	+	375000	C0H498	mitochondrial+carrier+protein%2C+putative	58.3	78.9	108.1	69.3	43.9	22	1.1	7.4	49.9	438.9	0
PF3D7_0407600	chr4	373039	376677	+	375000	812366	conserved+Plasmodium+protein%2C+unknown+function	0	0	0	0	0	0	0	44.5	96.2	140.7	1
PF3D7_0407700	chr4	377481	383087	-	385000	812365	conserved+Plasmodium+protein%2C+unknown+function	0	0	0	2.4	0.8	9.1	0	0	5.7	18	0
PF3D7_0407800	chr4	384924	390806	+	385000	812363	conserved+Plasmodium+protein%2C+unknown+function	5.5	0	13.1	107.2	443.6	400.6	2.9	732.8	73.3	1779	0
PF3D7_0407900	chr4	391347	393350	-	395000	812364	AAA+family+ATPase%2C+putative	37.5	18.9	66.5	64.3	200.1	320.9	1.3	176.3	98.5	984.3	0
PF3D7_0408000	chr4	394065	394580	-	395000	812361	conserved+Plasmodium+protein%2C+unknown+function	0	0	0	0	0	0	0	0	7.8	7.8	0
PF3D7_0408100	chr4	397328	400693	+	395000	812362	conserved+Plasmodium+protein%2C+unknown+function	0	0	0	0	0	0	0	0	0	0	0
PF3D7_0408300	chr4	403626	405366	-	405000	812358	zinc+finger%2C+RAN+binding+protein%2C+putative	9.3	4.3	4.6	0	2.6	0	7.5	105.3	7.7	141.3	1
PF3D7_0408400	chr4	406233	407909	-	405000	812355	conserved+Plasmodium+protein%2C+unknown+function	1.5	0	17.4	7.9	17.8	0	2.7	28.5	7.7	83.5	0
PF3D7_0408500	chr4	408679	410697	-	405000	FEN1	flap+endonuclease+1+%28FEN1%29	1.9	21.7	64.3	100.3	141.9	64.1	17.7	80.2	102.3	594.4	0
PF3D7_0408600	chr4	413403	416357	+	415000	812415	sporozoite+invasion-associated+protein+1%2C+putative+%28SIAP-1%29	9.6	0	0	0.8	10.4	9.9	3.8	5.9	398.9	439.3	1
PF3D7_0408700	chr4	417372	420824	-	415000	812416	perforin+like+protein+1+%28SPECT2%29	21.8	19.7	26.4	32.7	53.8	24.9	39.7	223.8	4333.1	4775.9	1
PF3D7_0408800	chr4	422011	422958	-	425000	812543	conserved+Plasmodium+protein%2C+unknown+function	0	0	0	0	0	0	0	1.3	9.8	11.1	0
PF3D7_0408900.1	chr4	424300	427194	+	425000	812544	peptidase%2C+M22+family%2C+putative	4.3	18.5	113.8	106.2	81.7	27.8	6	52.7	46.4	457.4	0
PF3D7_0409000	chr4	427664	435367	-	435000	812410	conserved+Plasmodium+protein%2C+unknown+function	3.9	0	8.1	22.8	14.4	0	8.5	6.6	1.6	65.9	0
PF3D7_0409100	chr4	436217	437981	-	435000	812409	U4%2FU6+small+nuclear+ribonucleoprotein+PRP31%2C+putative+%28PRPF31%29	498.2	504.1	617.2	499.8	493.9	434.7	440.9	446.7	1719.8	5655.3	1
PF3D7_0409200	chr4	438887	440335	+	435000	812403	40S+ribosomal+processing+protein%2C+putative	327.4	268.1	315.4	258.3	184.7	166.6	310.4	971.9	295.3	3098.1	0
PF3D7_0409300	chr4	440968	444242	-	445000	812404	conserved+Plasmodium+protein%2C+unknown+function	67.7	44.6	94.7	52.2	46.9	0	1	39	16.1	362.2	0
PF3D7_0409400	chr4	446000	448018	+	445000	DnaJ	heat+shock+protein+40+%28DnaJ%29	62.6	100.1	116.1	83.3	54.9	23	12.1	85.2	54	591.3	0
PF3D7_0409600	chr4	452134	455571	-	455000	RPA1	replication+protein+A1%2C+large+subunit+%28RPA1%29	25.7	117.3	406.8	337.2	432.1	246.5	0	435.3	457.2	2458.1	0
PF3D7_0409700	chr4	456922	458020	+	455000	812393	peptide+chain+release+factor+2%2C+putative	51.7	89	134.7	131.9	171.7	131.9	19.3	165.2	381.2	1276.6	0
PF3D7_0409800	chr4	459710	461437	+	465000	812387	conserved+Plasmodium+protein%2C+unknown+function	73.4	42	61	31.9	48.4	60	13.5	26.3	26.5	383	0
PF3D7_0409900	chr4	461991	463957	-	465000	actin	actin-like+protein%2C+putative	0.6	2.8	1.6	8.1	26	14.4	6.2	14.9	19.3	93.9	0
PF3D7_0410000	chr4	464732	467339	-	465000	812383	conserved+Plasmodium+protein%2C+unknown+function	137	102.4	77.1	29.7	102.4	184.7	22.2	20.6	18	694.1	0
PF3D7_0410300	chr4	470528	473596	-	475000	Q9U0I5	protein+phosphatase%2C+putative	179.6	100.7	207.2	175.4	189.2	67.4	26.6	150.4	482.6	1579.1	0
PF3D7_0410400	chr4	474542	475558	+	475000	RRP4	exosome+complex+component+RRP4%2C+putative+%28RRP4%29	125.4	145.1	170.8	143.3	128.4	58.6	43.7	209.1	115.7	1140.1	0
PF3D7_0410500	chr4	475944	476585	-	475000	812380	conserved+Plasmodium+protein%2C+unknown+function	0	0	0	13.7	0	0	0	72.3	15.2	101.2	0
PF3D7_0410600	chr4	479028	480468	+	475000	812381	conserved+Plasmodium+protein%2C+unknown+function	59.9	90	172.3	93.2	77.9	75.5	14.4	69.1	106.8	759.1	0
PF3D7_0410700	chr4	481177	483891	-	485000	812379	GTPase%2C+putative	7.4	12.3	36.8	89.9	262.4	133	0	160	184.9	886.7	0
PF3D7_0410800	chr4	485832	489728	+	485000	812377	conserved+Plasmodium+protein%2C+unknown+function	16.1	13.7	56.2	42	99.3	47.9	0	79.4	98.7	453.3	0
PF3D7_0410900	chr4	490442	493375	-	495000	812378	conserved+Plasmodium+protein%2C+unknown+function	33.3	20.7	70.8	46.6	41.6	13.9	0	44.1	5.1	276.1	0
PF3D7_0411000	chr4	499168	503880	+	505000	812375	conserved+Plasmodium+protein%2C+unknown+function	150.3	46.3	16.2	0	5.8	0	0	526.5	20.4	765.5	0
PF3D7_0411100	chr4	504478	505095	-	505000	812376	conserved+Plasmodium+protein%2C+unknown+function	0	0	12.5	6.2	13.1	0	0	38.7	19.5	90	1
PF3D7_0411200	chr4	505933	509670	-	505000	812374	conserved+Plasmodium+protein%2C+unknown+function	23.4	156.5	221.4	163.1	128.6	41.3	8.1	119.3	59.7	921.4	0
PF3D7_0411300	chr4	510380	512548	+	515000	Q9U0H5	conserved+Plasmodium+protein%2C+unknown+function	0	0	0	0	1.3	0	0	2.7	0	4	0
PF3D7_0411400	chr4	513154	517068	-	515000	812359	DEAD+box+ATP-dependent+RNA+helicase%2C+putative	39.4	31.5	88.1	28	16.6	0	4.9	5.4	142.3	356.2	0
PF3D7_0411700	chr4	518685	519101	-	515000	812357	conserved+Plasmodium+protein%2C+unknown+function	10.7	0	0.3	1.2	20.2	0	6.2	2203.9	248.8	2491.3	1
PF3D7_0411800	chr4	519832	525618	-	525000	812587	conserved+Plasmodium+protein%2C+unknown+function	0	0	4.5	8.3	6.5	5.1	0	9.4	2.9	36.7	0
PF3D7_0411900	chr4	528192	534485	-	535000	643632	DNA+polymerase+alpha	0	0	4.3	4.6	18.2	0	0	10.4	0	37.5	0
PF3D7_0412000	chr4	536774	539110	+	535000	812584	conserved+Plasmodium+protein%2C+unknown+function	2.2	18.3	87.8	214.2	246.7	73	0	78.8	54.5	775.5	0
PF3D7_0412100	chr4	540188	541198	-	545000	812585	mitochondrial+ribosomal+protein+S12+precursor%2C+putative	5.6	0.3	47.4	26.6	16.4	15.1	0	13	6.5	130.9	0
PF3D7_0412200	chr4	541811	542809	-	545000	812586	conserved+Plasmodium+protein%2C+unknown+function	3.1	8.7	5	12.5	2.4	0	0	3.4	12.2	47.3	0
PF3D7_0412300	chr4	543625	545247	+	545000	812582	phosphopantothenoylcysteine+synthetase%2C+putative	0	0	0	1.5	4.8	0	0	10.8	0	17.1	0
PF3D7_0412400	chr4	545987	553810	-	545000	VAR	erythrocyte+membrane+protein+1%2C+PfEMP1+%28VAR%29	80.5	26.1	32.6	16	11.3	9	32.9	51.4	53.1	312.9	0
PF3D7_0412600	chr4	559387	560638	-	565000	PFD0620c	rifin%2C+pseudogene	119.2	290.1	217.7	271.9	191.7	266.7	334.2	274.6	279	2245.1	0
PF3D7_0412700	chr4	561667	569342	-	565000	VAR	erythrocyte+membrane+protein+1%2C+PfEMP1+%28VAR%29	468.3	179.1	64.8	15.3	16.3	8.3	0	62.8	26	840.9	0
PF3D7_0412900	chr4	576810	584668	-	585000	VAR	erythrocyte+membrane+protein+1%2C+PfEMP1+%28VAR%29	1780.3	836.5	393.5	90.4	56.4	113.8	99.2	107	251.6	3728.7	0
PF3D7_0413100	chr4	591949	599849	-	595000	VAR	erythrocyte+membrane+protein+1%2C+PfEMP1+%28VAR%29	134.3	53.2	19.3	8.7	13.5	11.2	27	35.2	108.4	410.8	0
PF3D7_0413200	chr4	603166	604456	-	605000	RIF	rifin+%28RIF%29	18.4	8.1	2.8	8.1	51.9	4.6	12	3.9	22.3	132.1	0
PF3D7_0413300	chr4	609155	610433	+	605000	RIF	rifin+%28RIF%29	11.1	5.4	6.6	9.5	0	10.4	2.7	13.9	44	103.6	0
PF3D7_0413400	chr4	612798	614069	+	615000	812573	erythrocyte+membrane+protein+1+%28PfEMP1%29%2C+exon1%2C+pseudogene+%28VAR+pseudogene%29	10.6	0.3	4.3	3.8	1.3	0	6.9	0.9	35.1	63.2	0
PF3D7_0413500	chr4	615356	616243	+	615000	PGM2	phosphoglucomutase-2+%28PGM2%29	51.6	8.8	135.1	385.7	647.6	431.5	16.2	346.1	245.7	2268.3	0
PF3D7_0413600	chr4	616914	618350	-	615000	812570	26S+proteasome+AAA-ATPase+subunit+RPT3%2C+putative	54.7	49.3	107.9	79.9	148.6	38.7	24.6	112.7	89.2	705.6	0
PF3D7_0413700	chr4	619786	620802	-	625000	812571	lysine+decarboxylase-like+protein%2C+putative	4.8	26.2	302.4	319.3	295.5	139.4	1.2	126.9	25	1240.7	0
PF3D7_0413800	chr4	622094	622936	+	625000	812574	apicoplast+ribosomal+protein+L10+precursor%2C+putative	0.5	16.7	0	23.5	42.4	28.2	0.1	53.1	2.7	167.2	0
PF3D7_0413900	chr4	623168	626226	-	625000	812575	ubiquitin+carboxyl-terminal+hydrolase+a%2C+putative	19.8	17.7	45.4	41.8	69.1	5.9	6.9	118	0	324.6	0
PF3D7_0414000	chr4	626891	633126	-	635000	812569	chromosome+associated+protein%2C+putative	0	0	45.5	53.8	17.8	36.7	0	59.1	28.4	241.3	0
PF3D7_0414100	chr4	634029	638905	-	635000	812567	conserved+Plasmodium+membrane+protein%2C+unknown+function	0	0	6.1	0	0	0	0	0	0	6.1	0
PF3D7_0414400	chr4	652350	653554	+	655000	812566	conserved+Plasmodium+protein%2C+unknown+function	0	2.1	0	4.9	0	0	1.3	0	16.7	25	0
PF3D7_0414500	chr4	655025	657314	-	655000	812564	RNA+binding+protein%2C+putative	28.9	1.2	8	11.2	20.5	12.7	17.2	252.5	22.8	375	1
PF3D7_0414600	chr4	658620	659538	-	655000	812565	conserved+protein%2C+unknown+function	6	8.1	46.7	33.6	76.9	69.6	34.9	114	119.8	509.6	0
PF3D7_0414700	chr4	660624	662519	+	665000	812563	GTP+binding+protein%2C+putative	0	5.5	55.8	57.2	99.2	80.7	2.4	47.5	51.9	400.2	0
PF3D7_0414800	chr4	663416	664015	-	665000	812561	conserved+Plasmodium+protein%2C+unknown+function	4.9	0	0	2.3	49.3	68.4	13.4	0	13.2	151.5	0
PF3D7_0414900	chr4	665973	668147	+	665000	812562	conserved+ARM+repeats+protein%2C+unknown+function	62.4	22.5	20.5	50	390.2	620.5	51.8	49.6	66.4	1333.9	0
PF3D7_0415000	chr4	668578	669717	-	665000	812559	arsenical+pump-driving+ATPase%2C+putative	55.3	15.9	40.9	39.6	34.1	7.9	0	21.3	0	215	0
PF3D7_0415100	chr4	670883	672124	+	675000	812560	conserved+Plasmodium+protein%2C+unknown+function	31	15.2	4.4	10.5	38.4	6.3	7.8	20.8	0	134.4	0
PF3D7_0415200	chr4	672500	679138	-	675000	812556	conserved+Plasmodium+protein%2C+unknown+function	0	28.8	134.6	185.9	197.9	84.1	0	172.9	28	832.2	0
PF3D7_0415300	chr4	681810	685968	+	685000	CRK3	cdc2-related+protein+kinase+3+%28CRK3%29	275.9	224.9	277.8	166.8	166.9	94.6	75.9	383.6	342.2	2008.6	0
PF3D7_0415400	chr4	686414	687040	-	685000	COPI	nonclathrin+coat+protein+zeta2-cop-related+protein%2C+putative	445.9	188.2	304.1	301	416.1	416.4	415.3	423.9	1291.1	4202	1
PF3D7_0415500	chr4	688192	689053	+	685000	812555	nuclear+cap-binding+protein%2C+putative	36.2	20.4	41.5	27.3	27.6	17.2	26.8	76.6	75.9	349.5	0
PF3D7_0415600	chr4	689640	690329	-	685000	GAK	adenylate+kinase+%28GAK%29	23.7	34.2	169.4	92	48	17.4	37	154.4	43.1	619.2	0
PF3D7_0415700	chr4	691131	692516	-	695000	812547	conserved+Plasmodium+protein%2C+unknown+function	4.9	16.3	94.3	94.7	150.1	87.1	7.3	27.8	17.9	500.4	0
PF3D7_0415800	chr4	693906	696533	+	695000	812545	RING+zinc+finger+protein%2C+putative	0	0	0	0	5	0	0	3.4	0	8.4	0
PF3D7_0415900	chr4	697918	698768	-	695000	C0H4A6	60S+ribosomal+protein+L15%2C+putative	2425.8	1464.7	2665.2	1620.2	1105.7	687	423.2	1176.1	292.4	11860.3	0
PF3D7_0416000	chr4	701526	704162	-	705000	812542	RNA+binding+protein%2C+putative	119.6	274.5	464.4	514.2	542.6	495.7	93.2	426.8	406.9	3337.9	0
PF3D7_0416100	chr4	706529	709009	+	705000	812540	glutamyl-tRNA%28Gln%29+amidotransferase+subunit+A%2C+putative	2.4	0	6.4	15.3	22.2	0.5	0	15.4	21.2	83.4	0
PF3D7_0416200	chr4	709460	710083	-	705000	812541	conserved+Plasmodium+protein%2C+unknown+function	82.8	54.2	82.1	52.9	57.2	22.5	77.3	55.3	155.1	639.4	0
PF3D7_0416300	chr4	711092	715489	-	715000	812537	DNA+replication+licensing+factor%2C+putative	0	0	9.9	10.9	34.3	0.9	6.2	31.6	0	93.8	0
PF3D7_0416400	chr4	718202	722654	+	725000	HAT1	histone+acetyltransferase%2C+putative+%28HAT1%29	12.6	22.5	80.5	89	149.6	84.7	4.5	63.7	97.2	604.3	0
PF3D7_0416500	chr4	723073	724242	-	725000	812526	conserved+Plasmodium+protein%2C+unknown+function	11.7	8	10.9	30.6	53.5	66.5	28	122.8	5.9	337.9	0
PF3D7_0416600	chr4	726265	727128	+	725000	812524	prohibitin-like+protein%2C+putative	0	3.7	18.1	20	25.7	17.5	0	33.6	0	118.6	0
PF3D7_0416800	chr4	729962	731223	+	735000	COPI	small+GTP-binding+protein+sar1+%28SAR1%29	1246.2	1152.8	1717.7	2347	2460.8	1357.3	148.2	973.8	723.3	12127.1	0
PF3D7_0416900	chr4	732452	739872	-	735000	812523	conserved+Plasmodium+protein%2C+unknown+function	72.7	46.6	110.9	83.7	54.7	25.3	6	99	29.9	528.8	0
PF3D7_0417000	chr4	742149	743091	+	745000	812522	conserved+Plasmodium+protein%2C+unknown+function	5.8	9.9	3.1	11.8	1	8.1	9.1	151.6	14.6	215	1
PF3D7_0417100	chr4	743611	745637	-	745000	PUF2	RNA+binding+protein+Puf2+%28PUF2%29	0	3	0	0	0	0	1.7	33.4	124.8	162.9	1
PF3D7_0417200	chr4	748088	749914	+	745000	3QGT	bifunctional+dihydrofolate+reductase-thymidylate+synthase+%28DHFR-TS%29	0	0.7	19.1	31	37.7	17.8	0.7	1.6	10.8	119.4	0
PF3D7_0417300	chr4	750860	753712	-	755000	812521	LETM1-like+protein%2C+putative	179	204.6	250.7	220.2	179.2	70.8	25.5	237.6	511	1878.6	0
PF3D7_0417400	chr4	756294	776603	+	765000	812519	conserved+Plasmodium+protein%2C+unknown+function	133.5	102.3	127.9	84.9	120.1	53.6	24.9	126.4	386	1159.6	0
PF3D7_0417500	chr4	777200	779424	-	775000	C0H4B1	memo-like+protein	17.4	78.2	199.5	205.9	348.2	178.9	31	119.5	188.6	1367.2	0
PF3D7_0417600	chr4	780250	783246	-	785000	812516	conserved+Plasmodium+protein%2C+unknown+function	0	11.1	7.7	16.7	32.6	4.6	18.6	114.4	145	350.7	1
PF3D7_0417700	chr4	784194	786430	+	785000	812515	conserved+Plasmodium+protein%2C+unknown+function	0	0	0	0	6.8	0	0	68.7	20.8	96.3	1
PF3D7_0417800	chr4	787243	789342	-	785000	CRK1	cdc2-related+protein+kinase+1+%28CRK1%29	60.9	89.5	225.2	260.3	191.1	71.2	7.7	207.9	277.5	1391.3	0
PF3D7_0417900	chr4	790724	792985	+	795000	812517	conserved+Plasmodium+protein%2C+unknown+function	0	0	0	0.6	0	0	0	12.1	0	12.7	0
PF3D7_0418100	chr4	810995	814642	-	815000	812513	conserved+Plasmodium+protein%2C+unknown+function	349.2	229.7	284	205.6	149.9	102.4	121.7	244.2	100.1	1786.8	0
PF3D7_0418200	chr4	817400	818689	+	815000	812514	golgi+organization+and+biogenesis+factor%2C+putative	198	99.2	260.3	129.3	103.9	45.4	66.2	42.5	31	975.8	0
PF3D7_0418300	chr4	819362	822340	-	825000	812511	conserved+Plasmodium+protein%2C+unknown+function	66.2	29.6	49.5	44.5	74.4	21.6	69.6	20.9	108.7	485	0
PF3D7_0418400	chr4	829963	830594	+	835000	812512	conserved+Plasmodium+protein%2C+unknown+function	49.3	70.5	83.5	64.2	56.3	15.9	6.4	17.5	32.5	396.1	0
PF3D7_0418500	chr4	830989	832428	-	835000	BET3p	Bet3+transport+protein%2C+putative+%28BET3p%29	30	37.8	100.1	88.7	83.6	26.6	0	59.4	24.4	450.6	0
PF3D7_0418600	chr4	834394	840429	+	835000	812503	regulator+of+chromosome+condensation%2C+putative	9	0	2.3	13.4	127.9	246.6	7.5	31.9	62.3	500.9	0
PF3D7_0418700	chr4	841196	842905	+	845000	812504	conserved+Plasmodium+protein%2C+unknown+function	118.4	66.4	105.5	55.5	58.3	74.6	23.4	132.2	71.8	706.1	0
PF3D7_0418800	chr4	843562	845169	+	845000	812501	conserved+Plasmodium+protein%2C+unknown+function	11.7	40.5	2.7	48.8	8.3	16.6	28	3528.1	35.4	3720.1	1
PF3D7_0418900	chr4	847231	849059	+	845000	812502	conserved+Plasmodium+protein%2C+unknown+function	0	11	38	58.7	35.2	14.3	0	143.7	808.5	1109.4	0
PF3D7_0419000	chr4	849793	852242	+	855000	812497	conserved+Plasmodium+protein%2C+unknown+function	0	0	0	0	6.1	0	3.3	61.2	8.4	79	1
PF3D7_0419100	chr4	852510	853566	+	855000	812494	conserved+Plasmodium+protein%2C+unknown+function	1.9	11.7	10.7	15.7	7.2	0	12.2	5.5	22.8	87.7	0
PF3D7_0419200	chr4	854879	855289	+	855000	812492	CGI-141+protein+homolog%2C+putative	83.2	53.5	79.8	150.6	268.5	269.3	14.8	138.5	73.5	1131.7	0
PF3D7_0419300	chr4	855898	857049	-	855000	812493	conserved+Plasmodium+protein%2C+unknown+function	0	1.8	36.2	74.8	98.1	40.2	7.2	16.8	17	292.1	0
PF3D7_0419400	chr4	857998	865957	+	865000	812490	conserved+Plasmodium+protein%2C+unknown+function	6.8	1.7	14.4	51.1	104.7	66	24.4	59.7	42.4	371.2	0
PF3D7_0419500	chr4	866501	868111	-	865000	812488	conserved+Plasmodium+membrane+protein%2C+unknown+function	20.5	0	33.6	13.7	28.5	0	0	0	1.1	97.4	0
PF3D7_0419600	chr4	870737	871873	+	875000	812489	ran+binding+protein+1%2C+putative	484.6	112.8	357.4	282.9	231.9	88.3	148.5	324.6	108.3	2139.3	0
PF3D7_0419700	chr4	873138	874115	+	875000	Pf34	apical+merozoite+protein+%28Pf34%29	59.7	12	33.7	246.5	1285.8	1109.1	150.6	288.2	159.2	3344.8	0
PF3D7_0419800	chr4	874811	875521	-	875000	812486	60S+ribosomal+protein+L7ae%2FL30e%2C+putative	96.5	49.7	117.4	28.1	57.1	27.1	47	41.5	19.6	484	0
PF3D7_0419900	chr4	878022	893866	+	885000	9221806	phosphatidylinositol+4-kinase%2C+putative	271.9	206.1	183.9	194.9	324.6	125.2	5.2	151.7	31.9	1495.4	0
PF3D7_0420000	chr4	894612	904724	-	895000	812483	zinc+finger+protein%2C+putative	52	20.2	91.4	18.7	39.5	19.4	15.8	37	46	340	0
PF3D7_0420100	chr4	907056	908801	+	905000	RIO2	RIO-like+serine%2Fthreonine+kinase%2C+putative+%28RIO2%29	195.6	124.6	213.2	142.7	97.4	58.2	70.3	268.4	421.1	1591.5	0
PF3D7_0420200	chr4	910187	911971	+	915000	486945	holo-%28acyl-carrier+protein%29+synthase%2C+putative	3.8	0	0	14.2	0	6.7	5.5	18.1	6.7	55	0
PF3D7_0420300	chr4	917990	928411	+	925000	812480	transcription+factor+with+AP2+domain%28s%29+%28ApiAP2%29	141.6	52.4	174	71.6	116.2	333.5	15.6	139.4	1194.8	2239.1	0
PF3D7_0420400	chr4	929340	930140	+	925000	812475	ribosome+recycling+factor%2C+putative	26	52.8	140.6	137.5	131.2	50.2	34.8	335	286	1194.1	0
PF3D7_0420700	chr4	935031	941875	-	935000	VAR	erythrocyte+membrane+protein+1%2C+PfEMP1+%28VAR%29	5.2	2.1	0	0	1.1	6.7	0	0	0	15.1	0
PF3D7_0421100	chr4	958067	965611	-	965000	VAR	erythrocyte+membrane+protein+1%2C+PfEMP1+%28VAR%29	73.1	51.3	37	54	41.7	51.4	59.4	48.3	54.3	470.5	0
PF3D7_0421200	chr4	967087	968273	+	965000	RIF	rifin+%28RIF%29	9.1	14.2	18	12.3	2.8	4.6	28.4	20.2	85.7	195.3	1
PF3D7_0421300	chr4	969031	976591	-	975000	VAR	erythrocyte+membrane+protein+1%2C+PfEMP1+%28VAR%29	109.8	23.7	12.9	0	9.2	1.9	14	125.2	59.2	355.9	0
PF3D7_0421500	chr4	981823	982990	-	985000	RIF	rifin%2C+pseudogene+%28RIF%29	10.4	28.9	26.3	7.3	15.3	14.1	15.2	91.2	17.5	226.2	0
PF3D7_0421600	chr4	986135	987447	+	985000	812472	erythrocyte+membrane+protein+1+%28PfEMP1%29-like+pseudogene+%28VAR+pseudogene%29	2.6	0	2.2	0	4.8	3.8	0	0	5.4	18.8	0
PF3D7_0422000	chr4	998647	1000185	+	995000	654432	steroid+dehydrogenase%2C+putative	52.7	37.3	62.3	56.5	38.6	21.5	0	422.1	149.7	840.7	0
PF3D7_0422100	chr4	1001613	1002770	+	1005000	812466	transmembrane+emp24+domain-containing+protein%2C+putative	19	7.4	26.2	9	17.5	0.8	0	9.3	4.1	93.3	0
PF3D7_0422200	chr4	1004462	1017247	-	1015000	812467	erythrocyte+membrane-associated+antigen	2.7	0.1	19.3	0.1	20.5	0	0	15.2	0	57.9	0
PF3D7_0422300	chr4	1022487	1024166	+	1025000	160108	alpha+tubulin+2	12.9	7.4	36.4	68.9	93.2	74.2	27.7	220.3	49.6	590.6	0
PF3D7_0422400	chr4	1026648	1027399	+	1025000	812460	40S+ribosomal+protein+S19%2C+putative	220.9	133.6	247.1	109.1	122	55.4	52.7	55.8	55.2	1051.8	0
PF3D7_0422500	chr4	1029329	1037953	+	1035000	BRR2	pre-mRNA-splicing+helicase+BRR2%2C+putative+%28BRR2%29	110.1	40.8	154.4	103	99	29	13.6	96.8	22.1	668.8	0
PF3D7_0422600	chr4	1038697	1039119	-	1035000	812457	conserved+Plasmodium+protein%2C+unknown+function	24.4	0	21	12.5	4.1	0	0	28.3	0	90.3	0
PF3D7_0422700	chr4	1040470	1041642	+	1045000	812458	eukaryotic+initiation+factor%2C+putative	103.2	42.4	137.9	71.5	64.4	16.3	5.9	44.9	0	486.5	0
PF3D7_0422800	chr4	1042564	1044896	+	1045000	PfSR12	serpentine+receptor%2C+putative+%28PfSR12%29	18.7	4.4	17.5	49.4	70.3	78.7	32.5	66.8	63.2	401.5	0
PF3D7_0422900	chr4	1045381	1046696	+	1045000	812452	conserved+Plasmodium+protein%2C+unknown+function	0	0	1.2	0	4.2	8.8	0	80.8	28	123	1
PF3D7_0423000	chr4	1047696	1048478	+	1045000	812440	conserved+Plasmodium+protein%2C+unknown+function	0	1.2	0	4.8	0	0	0	38	0	44	0
PF3D7_0423100	chr4	1049270	1049894	-	1045000	812595	clathrin+assembly+protein%2C+putative	176.4	109.2	218.1	257.4	217.9	99.2	6.6	344	93.6	1522.4	0
PF3D7_0423200	chr4	1050407	1050974	+	1055000	812445	BSD+domain%2C+putative	33.9	16.3	24.5	13.4	45.9	20.1	30.4	68.3	55.2	308	0
PF3D7_0423300	chr4	1051576	1053006	-	1055000	812446	conserved+Plasmodium+protein%2C+unknown+function	8.7	0	3.7	85.4	406.1	401.9	1.7	1877.3	126.5	2911.3	0
PF3D7_0423400	chr4	1055665	1056318	+	1055000	AARP	asparagine-rich+protein+%28AARP%29	2.9	0	0	4.4	128.4	87	8.8	20.9	0	252.4	0
PF3D7_0423500	chr4	1058997	1060551	+	1055000	GAPM2	glideosome+associated+protein+with+multiple+membrane+spans+2+%28GAPM2%29	72.7	80	160.1	487.9	892.6	889.3	94	604.9	162.9	3444.4	0
PF3D7_0423600	chr4	1061790	1066628	-	1065000	812438	conserved+Plasmodium+protein%2C+unknown+function	164.4	113.8	148.3	116.9	123.1	91.2	28.4	177.4	76.8	1040.3	0
PF3D7_0423700	chr4	1071435	1071845	-	1075000	812439	early+transcribed+membrane+protein+4+%28ETRAMP4%29	108.3	154.5	461	902.3	1166.4	1397.5	412.3	163	95.1	4860.4	0
PF3D7_0423800	chr4	1076347	1077534	+	1075000	812432	conserved+Plasmodium+protein%2C+unknown+function	2.8	0	1.2	13.4	88.2	107.3	1.8	9.4	96.8	320.9	0
PF3D7_0423900	chr4	1077926	1078488	-	1075000	812433	probable+protein%2C+unknown+function	163.3	51	22.1	38.8	143.7	341.3	715.1	25.5	435.5	1936.3	0
PF3D7_0424000	chr4	1080959	1082189	+	1085000	812434	Plasmodium+exported+protein+%28PHISTc%29%2C+unknown+function	83.2	183.5	271.5	70.6	27.7	0	6.2	3.6	40	686.3	0
PF3D7_0424100	chr4	1082363	1084150	-	1085000	RH5	reticulocyte+binding+protein+homologue+5+%28RH5%29	0	0	0	0	47	32.8	0	0	6.5	86.3	0
PF3D7_0424200	chr4	1085979	1091277	-	1085000	RH4	reticulocyte+binding+protein+homologue+4+%28RH4%29	0.6	0	0	0	17.9	63.2	3.4	0	0.1	85.2	0
PF3D7_0424300	chr4	1093138	1097835	+	1095000	812436	erythrocyte+binding+antigen-165%2C+pseudogene+%28EBA165%29	12.2	4.3	0.5	11.2	34.9	148.4	16	0	26.1	253.6	0
PF3D7_0424400	chr4	1099811	1107111	+	1105000	812428	surface-associated+interspersed+gene+4.2%2C+%28SURFIN4.2%29+%28SURF4.2%29	0	0	0	0	0	0	0	0	0	0	0
PF3D7_0424500	chr4	1110060	1112293	+	1115000	CAD49279.1	serine%2Fthreonine+protein+kinase%2C+FIKK+family+%28FIKK4.1%29	140.7	74.6	25.9	18.8	41.9	66.2	528.1	7.4	33.2	936.8	0
PF3D7_0424600	chr4	1113345	1114486	-	1115000	PF3D7_0424600	Plasmodium+exported+protein+%28PHISTb%29%2C+unknown+function	377.2	141	219.2	84.9	55.6	279.7	3244.3	1.9	0	4403.8	0
PF3D7_0424700	chr4	1118430	1122414	+	1125000	PFD1175w	serine%2Fthreonine+protein+kinase%2C+FIKK+family+%28FIKK4.2%29	1407.3	859.1	447.3	77.6	43	108.4	382.5	7.7	36.5	3369.4	0
PF3D7_0424800	chr4	1123986	1125004	+	1125000	Q8IFL8	Plasmodium+exported+protein+%28PHISTb%29%2C+unknown+function	6.4	0	3.2	0	0	4.7	30.2	2.9	3.1	50.5	0
PF3D7_0424900	chr4	1127779	1128802	+	1125000	Q8IFL7	Plasmodium+exported+protein+%28PHISTa%29%2C+unknown+function	30.5	0	0	0	0	0	1	0	0	31.5	0
PF3D7_0425000	chr4	1129660	1130893	-	1135000	PFD1195c	Plasmodium+exported+protein%2C+unknown+function%2C+pseudogene	16.5	0	0	0	0	6.5	0	0	17.9	40.9	0
PF3D7_0425200	chr4	1136586	1137385	+	1135000	Q8IFL3	Plasmodium+exported+protein+%28hyp15%29%2C+unknown+function	41.3	10.4	0	8	1	13.2	306.3	0	8.7	388.9	0
PF3D7_0425300	chr4	1141222	1142096	+	1145000	PF3D7_0425300	Plasmodium+exported+protein+%28PHISTa%29%2C+unknown+function%2C+pseudogene	0.1	0	0	5.5	3.7	0	3.3	6.5	18.7	37.8	0
PF3D7_0425400	chr4	1143992	1144824	+	1145000	812407	Plasmodium+exported+protein+%28PHISTa%29%2C+unknown+function	23.8	11.7	7.4	6.9	7.3	2.6	32.3	0	22	114	0
PF3D7_0425500	chr4	1146672	1147697	-	1145000	rosetting	stevor	0.7	0	0	0	0	0	0	0	5.3	6	0
PF3D7_0425600	chr4	1149274	1150188	+	1145000	PF3D7_0425600	rifin%2C+pseudogene	1.7	21.7	29.2	24.4	6.8	0	12.3	24.4	44.1	164.6	0
PF3D7_0425700	chr4	1152504	1153633	-	1155000	812402	rifin+%28RIF%29	13.1	7.9	14	0	7.4	6.7	21.5	28.5	32.1	131.2	0
PF3D7_0425800	chr4	1156423	1167821	+	1165000	rosetting	erythrocyte+membrane+protein+1%2C+PfEMP1+%28VAR%29	127.8	45.9	35.5	24.1	22.8	27.3	31.4	55.7	73.8	444.3	0
PF3D7_0425900	chr4	1169980	1171184	+	1175000	PFD1240w	rifin+%28RIF%29	27.8	46.7	31.6	34.1	42.9	97.2	20.6	39.4	49.3	389.6	0
PF3D7_0426000	chr4	1173053	1180226	-	1175000	MAL4P1.244	erythrocyte+membrane+protein+1%2C+PfEMP1+%28VAR%29	47.7	79	60.3	64.3	62.5	86.2	63.2	93.9	112.2	669.3	0
PF3D7_0500100	chr5	20929	28456	+	25000	PF3D7_0500100	erythrocyte+membrane+protein+1%2C+PfEMP1+%28VAR%29	89.4	54	46.7	27.1	73.4	62.3	28.5	60.6	87.9	529.9	0
PF3D7_0500300	chr5	29776	30963	-	35000	PFE0015c	rifin%2C+pseudogene	14.9	15.4	0	9.8	11.2	24.9	17	19.5	93.9	206.6	1
PF3D7_0500400	chr5	33056	34378	-	35000	Q8I494	rifin+%28RIF%29	11.1	11.6	11.3	18	13.6	7	35.4	11.1	114.3	233.4	1
PF3D7_0500500	chr5	36464	37564	-	35000	Q8I493	rifin+%28RIF%29	0.6	2.2	4.2	0	17.1	0	7	12	29.9	73	0
PF3D7_0500600	chr5	39443	40488	-	35000	apicoplastgene	stevor%2C+pseudogene	0	0	4.2	12.1	10.8	7.6	9.5	0	15.2	59.4	0
PF3D7_0500700	chr5	41129	41403	-	45000	PFE0035c	rifin%2C+pseudogene	1594.5	1237.5	1457.5	1935.3	2178	2033.2	2220.3	1651	3268.4	17575.7	0
PF3D7_0500800	chr5	43327	47761	-	45000	Q8I492	mature+parasite-infected+erythrocyte+surface+antigen%2Cerythrocyte+membrane+protein+2+%28MESA%29	16.5	26.7	226.9	35.5	36.9	25.5	0	0	0	368	0
PF3D7_0500900	chr5	50422	52510	-	55000	PFE0045c	serine%2Fthreonine+protein+kinase%2C+FIKK+family+%28FIKK5%29	9.7	11.6	7.3	24.4	68.1	56.8	25	10.7	22	235.6	0
PF3D7_0501000	chr5	55841	56872	+	55000	124505943	Plasmodium+exported+protein%2C+unknown+function	1430.2	1207.6	1722.1	1040.7	690.8	309	86.5	13.7	19.6	6520.2	0
PF3D7_0501100.1	chr5	58037	59726	-	55000	Q8I489	heat+shock+protein+40%2C+type+II+%28HSP40%29	116	39.4	28.9	21.8	38.6	49.3	434.3	0	8.9	737.2	0
PF3D7_0501200	chr5	64065	65489	+	65000	Q8I488	parasite-infected+erythrocyte+surface+protein+%28PIESP2%29	390.7	470.1	839.5	467.3	404.4	114.4	34.6	13.2	0	2734.2	0
PF3D7_0501300	chr5	68930	70113	+	65000	124505949	skeleton-binding+protein+1+%28SBP1%29	7962.1	2687.9	955.1	265.8	314.3	1437.2	5796.3	34.9	59.2	19512.8	0
PF3D7_0501400	chr5	74509	79842	+	75000	hist_chap	interspersed+repeat+antigen+%28FIRA%29	11527.6	2050.2	782.5	544.6	1169.6	3294.7	6698.1	195.1	89.6	26352	0
PF3D7_0501500	chr5	81134	82336	-	85000	MCprot	rhoptry-associated+protein+3+%28RAP3%29	0	0	0	35.1	308	312.4	0	0	0	655.5	0
PF3D7_0501600	chr5	84041	85237	-	85000	PF3D7_0501600	rhoptry-associated+protein+2+%28RAP2%29	15.1	0	21.5	70.5	234.2	143.4	4.3	22.6	5.2	516.8	0
PF3D7_0501700	chr5	86820	89201	-	85000	124505957	anaphase+promoting+complex+subunit%2C+putative	0	0.9	0	0	0	0	0	0	0	0.9	0
PF3D7_0501800	chr5	91361	94591	+	95000	Q8I482	chromosome+assembly+factor+1+%28CAF1%29	0	9.3	48.6	52.3	78.5	13.2	0	28.5	0	230.4	0
PF3D7_0501900	chr5	95161	96633	-	95000	MAL5P1.20	conserved+Plasmodium+protein%2C+unknown+function	8.3	17.8	9.4	15.6	17.6	27.6	5.8	20.1	12.3	134.5	0
PF3D7_0502000	chr5	97657	101895	+	95000	23504506	conserved+Plasmodium+protein%2C+unknown+function	129.1	22.3	82.4	82.6	75	40.5	4.2	47	0	483.1	0
PF3D7_0502100	chr5	102193	102897	-	105000	12368867	HCNGP-like+protein	0	0	3.4	16.7	18.4	0	0	29.5	0	68	0
PF3D7_0502200	chr5	104256	105737	+	105000	Q8I478	conserved+Plasmodium+membrane+protein%2C+unknown+function	49.4	49.6	144.9	117.8	146.1	82.2	0	77.3	15.8	683.1	0
PF3D7_0502300	chr5	107075	107938	-	105000	12368867	conserved+Plasmodium+protein%2C+unknown+function	0	0	0	0	2.5	0	1.9	1914.7	818.1	2737.2	1
PF3D7_0502400	chr5	109898	111691	-	115000	MSP8	ring-stage+membrane+protein+1%2Cmerozoite+surface+protein+8+%28MSP8%29	13.6	0	15.3	0	1.2	0.3	6.5	0	0	36.9	0
PF3D7_0502500	chr5	114149	115933	+	115000	PF3D7_0502500	conserved+Plasmodium+protein%2C+unknown+function	3.5	8.6	3.2	13.5	14.5	8.6	42.5	57	11.4	162.8	0
PF3D7_0502700	chr5	120107	121455	-	125000	C0H4C2	conserved+Plasmodium+protein%2C+unknown+function	3.9	9.2	78.5	55.3	35.3	0	0	49.2	1.9	233.3	0
PF3D7_0502800	chr5	122449	122862	+	125000	CAD51393.1	DnaJ+protein%2C+putative	105.6	72.7	143.9	72.4	28.2	0	1.6	151.9	7.7	584	0
PF3D7_0502900	chr5	123332	123904	-	125000	23504514	mitochondrial+inner+membrane+TIM10+associated+protein%2C+putative	128.5	175.3	319.2	253.2	214.1	105.2	0	925.4	23.5	2144.4	0
PF3D7_0503000	chr5	125116	126514	+	125000	PF3D7_0503000	organelle+ribosomal+protein+L28+precursor%2C+putative	23.4	51.4	233.1	243.5	291.8	125.7	8.5	1821.4	118.4	2917.2	0
PF3D7_0503100	chr5	127064	128677	-	125000	MAL5P1.31	4-diphosphocytidyl-2c-methyl-D-erythritol+kinase+%28CMK%29%2C+putative	26.9	37.9	136.6	175.9	211	74.6	3	30.4	104	800.3	0
PF3D7_0503200	chr5	130453	133392	+	135000	Q8I469	conserved+Plasmodium+protein%2C+unknown+function	2.2	0	8.9	28.8	12.7	5	0	142.9	10.6	211.1	0
PF3D7_0503300	chr5	135004	135930	-	135000	PFE0160c	Ser%2FArg-rich+splicing+factor%2C+putative	71.7	27.8	92.1	42.6	30.5	5.5	0	50.3	0	320.5	0
PF3D7_0503400	chr5	140710	141471	+	145000	PF3D7_0503400	actin-depolymerizing+factor+1+%28ADF1%29	521.3	460.3	1493.9	2624.5	4497.5	4494.1	3396.4	2147.3	3706.8	23342.1	0
PF3D7_0503500	chr5	142871	145423	-	145000	PFE0170c	protein+kinase%2C+putative	21.9	46.8	51	39.3	29.2	39.8	17.8	105.8	68.2	419.8	0
PF3D7_0503600	chr5	146639	150131	-	145000	12368867	myosin+B+%28MyoB%29	0	0	0	0	50.8	81.2	0	0	0	132	0
PF3D7_0503800	chr5	151422	152384	-	155000	XP_001351596.1	60S+ribosomal+protein+L31%2C+putative	207.2	99.6	214	70.8	171.5	15.8	4.5	28.5	0.8	812.7	0
PF3D7_0503900	chr5	153889	156057	-	155000	Q8I462	conserved+Plasmodium+protein%2C+unknown+function	0	15.3	13.5	6.6	14.8	0	0	0	0	50.2	0
PF3D7_0504000	chr5	157625	164968	+	165000	PF3D7_0504000	cation+transporting+P-ATPase+%28ATPase3%29	13.1	82.5	285.3	211.6	170.8	48.7	0.6	8	5.3	825.9	0
PF3D7_0504100	chr5	165650	166642	-	165000	MAL5P1.41	AN1-like+zinc+finger+family+protein	1.4	0	10.6	0	22	10.8	7.6	145.9	0	198.3	1
PF3D7_0504200	chr5	167649	169502	+	165000	PF3D7_0504200	ATP-dependent+helicase%2C+putative	6.8	27.5	140.2	99.4	96.9	86.8	29.5	73.7	126.7	687.5	0
PF3D7_0504300	chr5	169549	170590	-	175000	12368867	conserved+Plasmodium+protein%2C+unknown+function	0	0	0	0	0	0	0	39.4	0	39.4	0
PF3D7_0504400	chr5	172150	174417	+	175000	baseExcision	ATP-dependent+helicase%2C+putative	17.4	65.6	188.5	271.3	203	107.4	18.3	90.4	32.8	994.7	0
PF3D7_0504500	chr5	174989	176433	+	175000	12368867	conserved+Plasmodium+protein%2C+unknown+function	14.6	29.3	15.2	52.2	41.2	34.8	53.3	4858	64.3	5162.9	1
PF3D7_0504600	chr5	177410	178555	+	175000	PFE0225w	3-methyl-2-oxobutanoate+dehydrogenase+%28lipoamide%29%2C+putative	3.8	8.6	45.8	101.5	196.8	164.2	8.7	317.3	15.8	862.5	0
PF3D7_0504700	chr5	180421	187470	+	185000	812929	conserved+Plasmodium+protein%2C+unknown+function	0	0	0	0	0	0	0	12.1	0	12.1	0
PF3D7_0504800	chr5	187813	204732	-	195000	PFE0235c	conserved+Plasmodium+protein%2C+unknown+function	2.4	0	13.9	28	36.4	17.1	7.6	24.2	8.6	138.2	0
PF3D7_0504900	chr5	206450	208375	+	205000	PF3D7_0504900	conserved+Plasmodium+protein%2C+unknown+function	36.1	45.8	120.2	322.2	336.3	181	65	2197.1	82.8	3386.5	0
PF3D7_0505000	chr5	209062	218189	-	215000	296004512	conserved+Plasmodium+membrane+protein%2C+unknown+function	270.1	139.7	279.9	118.7	113.3	43.7	35.8	236.4	90.4	1328	0
PF3D7_0505100	chr5	220839	229253	+	225000	12368867	conserved+Plasmodium+protein%2C+unknown+function	0	0	7.8	2	2.9	0	0	2.1	0	14.8	0
PF3D7_0505200	chr5	230695	232392	+	235000	actin	actin-like+protein%2C+putative	4.1	6.6	7.1	6.5	0.8	0	4.4	3.2	13.8	46.5	0
PF3D7_0505300	chr5	233815	235650	+	235000	XP_001351611.1	UDP-N-acetyl+glucosamine%3AUMP+antiporter	0	0	13.2	37.5	32.6	55.3	24.5	0	0	163.1	0
PF3D7_0505400	chr5	236143	238365	-	235000	MAL5P1.54	conserved+Plasmodium+protein%2C+unknown+function	0	2	27	44	74.8	26	0	56	109.2	339	0
PF3D7_0505500	chr5	239456	243880	-	245000	PFE0270c	DNA+repair+protein%2C+putative	38.1	73.7	449.1	611	715.2	349.3	16.5	253.4	399.8	2906.1	0
PF3D7_0505600	chr5	245933	246934	+	245000	PF3D7_0505600	conserved+Plasmodium+protein%2C+unknown+function	0	0	0	0	0	0	0	3.8	0	3.8	0
PF3D7_0505700	chr5	247801	250575	-	245000	23504542	conserved+Plasmodium+membrane+protein%2C+unknown+function	0	0	9.3	4.2	26.6	0.3	0	22	3.9	66.3	0
PF3D7_0505800	chr5	252047	252606	-	255000	MAL5P1.58	small+ubiquitin-related+modifier%2C+putative+%28SUMO%29	323	469.8	786.4	676.9	565.8	284	35	171.5	91.2	3403.6	0
PF3D7_0505900	chr5	254473	255517	-	255000	PFE0290c	conserved+Plasmodium+protein%2C+unknown+function	11.9	44	143.3	144.8	180.1	35.6	0	114.4	0	674.1	0
PF3D7_0506000	chr5	256225	257378	+	255000	23504545	conserved+Plasmodium+protein%2C+unknown+function	93.2	90.3	107.8	152	102.1	68.9	23	108.8	15.3	761.4	0
PF3D7_0506100	chr5	257748	258831	-	255000	Q8I441	60S+ribosomal+subunit+protein+L24-2%2C+putative	115.3	49.4	148.3	78.2	33.9	14.4	40.8	506.6	102.6	1089.5	0
PF3D7_0506200	chr5	259764	260747	+	265000	RNApolyII	transcription+initiation+factor+TFiid%2C+TATA-binding+protein+%28TBP%29	12.6	8.2	10.5	0	24.4	0	6.1	10.8	3.8	76.4	0
PF3D7_0506300	chr5	260961	262184	-	265000	812893	conserved+Plasmodium+protein%2C+unknown+function	5.4	30.1	115.3	71	54.8	10	15.6	31.3	49.5	383	0
PF3D7_0506400	chr5	262672	263925	-	265000	MAL5P1.64	conserved+Plasmodium+protein%2C+unknown+function	62.8	98.3	72	86.9	85.6	87.7	85.2	3684.4	214.2	4477.1	1
PF3D7_0506500	chr5	265595	278345	+	275000	CAX63951.1	conserved+Plasmodium+protein%2C+unknown+function	39.9	21.2	87.2	60.8	41	16.2	26.6	56.7	78.2	427.8	1
PF3D7_0506700	chr5	280886	283345	+	285000	812886	conserved+Plasmodium+protein%2C+unknown+function	91.5	82.5	150.9	143.5	180	122.6	5.7	186.9	296.1	1259.7	0
PF3D7_0506800	chr5	284691	288023	+	285000	812884	conserved+Plasmodium+protein%2C+unknown+function	148.5	166.1	157.7	125.5	126.4	72.4	48	140.1	555.7	1540.4	1
PF3D7_0506900	chr5	288776	291055	-	285000	Q8I433	rhomboid+protease+ROM4+%28ROM4%29	37.1	22.5	92.2	537.2	1748.1	1341.4	92.6	4175.2	2785.8	10832.1	0
PF3D7_0507000	chr5	292696	293474	-	295000	CAD51435.1	conserved+Plasmodium+protein%2C+unknown+function	27.4	10.7	49.1	41.1	39.8	38.1	24	108.5	62.7	401.4	0
PF3D7_0507100	chr5	294668	295903	-	295000	PFE0350c	60S+ribosomal+protein+L4%2C+putative	3901.2	2458	3627.7	3258.4	2669.8	1110.5	1036	1380.4	750.9	20192.9	0
PF3D7_0507200	chr5	298427	300736	-	295000	proteases	subtilisin-like+protease+3%2C+putative+%28SUB3%29	11	28.8	24.4	127.8	547.6	314.2	40.9	272.2	416.4	1783.3	0
PF3D7_0507300	chr5	301930	304611	-	305000	CAD51438.1	conserved+Plasmodium+protein%2C+unknown+function	8.7	0	3.1	0	16.5	77.2	4.1	35.7	2694.7	2840	1
PF3D7_0507400	chr5	305961	306422	-	305000	12368867	conserved+Plasmodium+protein%2C+unknown+function	8.8	0	0	4	20.3	288.5	30.9	0	512.6	865.1	0
PF3D7_0507500	chr5	307490	309556	-	305000	23504560	subtilisin-like+protease+1+%28SUB1%29	21.8	14.7	30.8	52	260	733.1	38.8	39.1	160.3	1350.6	0
PF3D7_0507600	chr5	313199	315157	+	315000	P_body	cell+differentiation+protein%2C+putative+%28CAF40%29	63.9	164.1	109.6	155	129.3	118.3	89.1	156.1	64.2	1049.6	0
PF3D7_0507700	chr5	316766	318361	-	315000	124506075	nuclear+protein+localization+protein+4%2C+putative+%28NPL4%29	47.8	40	73.5	81.2	84.5	1.7	7.1	48.1	38.3	422.2	0
PF3D7_0507800	chr5	322239	326822	+	325000	CAD51443.1	conserved+Plasmodium+protein%2C+unknown+function	149.4	71.1	146.4	69.2	72.3	54.1	2.2	63.3	2148.4	2776.4	1
PF3D7_0507900	chr5	327656	328316	+	325000	XP_002808682.1	conserved+Plasmodium+protein%2C+unknown+function	22.5	7.1	8.4	15	11.4	1.5	8.5	59.5	89.2	223.1	0
PF3D7_0508000	chr5	328666	329715	-	325000	23504565	6-cysteine+protein+%28P38%29	9.4	2	19.3	140.4	725.1	657.4	13.6	1520.7	579.2	3667.1	0
PF3D7_0508100	chr5	331680	336704	+	335000	chrom_mod_prot	SET+domain+protein%2C+putative+%28SET9%29	16.7	14.4	14	49.6	89	51.6	13.8	53.1	59.6	361.8	0
PF3D7_0508200	chr5	337426	339025	-	335000	XP_002808683.1	longevity-assurance+%28LAG1%29+domain+protein%2C+putative	6.6	8.6	29.7	73.4	105.2	37.3	26	1253.4	163.1	1703.3	0
PF3D7_0508300	chr5	342205	343233	+	345000	isoprenoidmetpath	triose+phosphate+transporter+%28oTPT%29	98.9	165.6	369.6	316.5	296.4	71.5	8	21	26.2	1373.7	0
PF3D7_0508400	chr5	344931	346744	+	345000	812860	transcription+factor+IIb%2C+putative	0.5	6.8	8.6	4.4	7.1	9	16.6	88.8	21.6	163.4	0
PF3D7_0508500	chr5	347219	355039	-	355000	23504571	guanidine+nucleotide+exchange+factor+%28RCC1%29	4.7	23.1	19.3	31.1	72.6	48	3.7	19.4	0.5	222.4	0
PF3D7_0508600	chr5	356222	357010	+	355000	PFE0425w	conserved+Plasmodium+protein%2C+unknown+function	427.3	211.3	332.1	296.5	479.8	449.4	92.1	767.9	163.8	3220.2	0
PF3D7_0508700	chr5	358261	362733	+	365000	PFE0430w	Pre-mRNA-processing+ATP-dependent+RNA+helicase+prp5%2C+putative+%28PRP5%29	8.2	3.9	24	12	32.9	12.9	0	45	0	138.9	0
PF3D7_0508800	chr5	363588	364442	-	365000	apicoplastgene	single-stranded+DNA-binding+protein+%28SSB%29	7.5	1.7	0	5.3	11.8	2.2	0	5.6	10.2	44.3	0
PF3D7_0508900	chr5	367022	376426	+	375000	MAL5P1.90	conserved+Plasmodium+protein%2C+unknown+function	0	8.3	4.2	12.8	40.9	26	16.8	113.6	17.8	240.4	0
PF3D7_0509000	chr5	376855	378452	-	375000	MAL5P1.91	SNAP+protein+%28soluble+N-ethylmaleimide-sensitive+factor+Attachment+Protein%29%2C+putative	3.6	11.5	40.1	32.6	57.1	23.6	0	42	13.8	224.3	0
PF3D7_0509100	chr5	381077	386203	+	385000	12368867	chromosome+condensation+protein%2C+putative	4	6.5	56.3	130.5	154.7	48.5	1.8	36.8	46.1	485.2	0
PF3D7_0509200	chr5	386956	388505	+	385000	124506105	leucine-rich+repeat+protein+%28LRR2%29	9.6	0.3	15.9	2	11.6	0	6.9	22	5.2	73.5	0
PF3D7_0509300	chr5	388696	389191	-	385000	12368867	conserved+Plasmodium+protein%2C+unknown+function	10.2	30.5	43.5	44.3	12.9	0	10.3	113.8	80.8	346.3	0
PF3D7_0509400	chr5	389914	398997	-	395000	124506109	RNA+polymerase+I+%28RNAPI%29	279.9	224.3	302.3	178	82.6	60.6	60.7	65.5	228.5	1482.4	0
PF3D7_0509500	chr5	401437	402771	+	405000	Q8I409	conserved+Plasmodium+protein%2C+unknown+function	0	2.8	9.9	13.1	7.5	4.2	1.3	37.9	8.4	85.1	1
PF3D7_0509600	chr5	403342	405642	+	405000	12368867	asparagine-tRNA+ligase%2C+putative	41.7	117	159.1	151.7	92.7	65.5	41.7	222.8	149.6	1041.8	0
PF3D7_0509700	chr5	405961	407897	-	405000	MAL5P1.98	conserved+Plasmodium+protein%2C+unknown+function	0	0	0	0	0	0	0	395.7	0	395.7	1
PF3D7_0509800	chr5	410268	415308	+	415000	PFE0485w	phosphatidylinositol+4-kinase	175.4	156.7	175.3	122.7	171.9	201.7	7.5	160.1	447.3	1618.6	0
PF3D7_0509900	chr5	416365	417309	+	415000	PFE0490w	conserved+Plasmodium+protein%2C+unknown+function	0	0	9.1	15.9	9.6	5.3	0	17.1	0	57	0
PF3D7_0510000	chr5	418136	421425	+	415000	23504586	conserved+Plasmodium+protein%2C+unknown+function	0	0	0	0	9.4	0	0	20.4	0	29.8	1
PF3D7_0510100	chr5	422746	430353	-	425000	MAL5P1.102	conserved+Plasmodium+protein%2C+unknown+function	7.5	17.8	240	246.5	292.2	131.7	0	43.7	109.5	1088.9	0
PF3D7_0510200	chr5	437495	439738	+	435000	2555	peptidyl-prolyl+cis-trans+isomerase+%28CYP87%29	94	63.7	111.7	123.2	91.2	67.7	14.1	64.7	40.8	671.1	0
PF3D7_0510300	chr5	440779	441879	-	445000	PFE0510c	conserved+Plasmodium+protein%2C+unknown+function	0	0	0	1.3	0	0	2.6	101.7	18.1	123.7	1
PF3D7_0510400	chr5	444260	445579	+	445000	XP_001351662.1	conserved+Plasmodium+protein%2C+unknown+function	7.5	9.9	17.7	18.8	0	0	0	0	0	53.9	0
PF3D7_0510500	chr5	445983	448502	-	445000	PFE0520c	topoisomerase+I	161.8	181.8	367.3	389.2	422	183.3	10.5	106.4	21.8	1844.1	0
PF3D7_0510700	chr5	459301	460344	+	455000	812829	conserved+Plasmodium+protein%2C+unknown+function	0	0	0	0	0	0	0	169.6	0	169.6	1
PF3D7_0510800	chr5	461017	464399	+	465000	PFE0540w	conserved+Plasmodium+protein%2C+unknown+function	22.7	22.4	38.6	28.1	44.2	16.6	64	120.8	177.3	534.7	1
PF3D7_0511000	chr5	467585	468100	-	465000	Q8I3Z5.1	translationally+controlled+tumor+protein+homolog%2C+putative	545.8	206.9	491.9	442.1	318.6	132.1	36.8	1193.5	12.3	3380	0
PF3D7_0511100	chr5	469276	469842	+	465000	12368867	conserved+Plasmodium+protein%2C+unknown+function	0	0	0	0	0	0	0	0	0	0	0
PF3D7_0511200	chr5	471055	474058	+	475000	Q8I0W9	stearoyl-CoA+delta+9+desaturase%2C+putative	17	5.8	38.5	78.1	135.7	89.3	3.4	188.4	770.9	1327.1	0
PF3D7_0511300	chr5	474487	478882	-	475000	MAL5P1.113	MORN+repeat+protein%2C+putative	1.5	7	25.2	29.7	17.9	5.2	1.2	9	25.5	122.2	0
PF3D7_0511400	chr5	481423	482568	+	485000	XP_001351671.1	conserved+Plasmodium+protein%2C+unknown+function	0	0	0	0	0	0	0	0	75.8	75.8	1
PF3D7_0511500	chr5	486602	516787	+	505000	15477199	RNA+pseudouridylate+synthase%2C+putative	41.7	20.3	34.1	24	31.4	5.1	12.6	2.5	8.2	179.9	0
PF3D7_0511600	chr5	517259	517885	-	515000	MAL5P1.116	conserved+Plasmodium+protein%2C+unknown+function	8.8	0	0	0	46.4	35.3	0	2	0	92.5	0
PF3D7_0511700	chr5	519129	520078	+	515000	PFE0580w	kinase+binding+protein+CGI-121%2C+putative	34.3	22.4	52.1	21.7	64.3	28.1	0	5.1	10.5	238.5	0
PF3D7_0511800	chr5	520720	522693	-	525000	23504603	myo-inositol+1-phosphate+synthase%2C+putative	83.1	30.9	103.2	122.1	162.2	51.5	18.1	278.8	16.8	866.7	0
PF3D7_0511900	chr5	525026	527218	+	525000	MAL5P1.119	conserved+Plasmodium+protein%2C+unknown+function	37.9	15.9	37.2	20.2	4.4	17.8	3.6	8	4	149	0
PF3D7_0512000	chr5	527639	528666	+	525000	12368867	prefoldin+subunit%2C+putative	93.4	66.9	266.9	132.5	104.3	30.9	0	551.2	395.6	1641.7	0
PF3D7_0512100	chr5	528846	529409	-	525000	PFE0600c	conserved+Plasmodium+protein%2C+unknown+function	0	0	4.6	0	0	0	0	95.8	1.2	101.6	1
PF3D7_0512200	chr5	529934	531901	-	535000	redoxmetpath	glutathione+synthetase+%28GS%29	23.6	68.3	62.1	74.5	40.7	6.2	14.6	51.5	18.7	360.2	0
PF3D7_0512300	chr5	533556	534338	-	535000	PF3D7_0512300	CDK-activating+kinase+assembly+factor+%28MAT1%29	3.2	0	14	5.5	0	0	0	6	0	28.7	0
PF3D7_0512400	chr5	536273	536977	+	535000	MAL5P1.124	conserved+Plasmodium+protein%2C+unknown+function	0	0	0	0	0	0	0	0	0.9	0.9	0
PF3D7_0512500	chr5	539731	542593	-	545000	23504610	conserved+Plasmodium+protein%2C+unknown+function	10.9	0	43.7	17.9	27	0	0	21.4	8.8	129.7	0
PF3D7_0512600	chr5	544540	545993	+	545000	PF3D7_0512600	Rab+GTPase+1b+%28Rab1b%29	221.4	150.8	332.1	337.1	410.4	165.1	28	671.7	360.8	2677.4	0
PF3D7_0512700	chr5	546734	547579	-	545000	pyrimidinemetpath	orotate+phosphoribosyltransferase+%28OPRT%29	128.5	116.1	247.7	119.3	98.1	12.5	8.5	50.9	25.8	807.4	0
PF3D7_0512800	chr5	548406	553340	-	555000	Q8I3X9	conserved+Plasmodium+protein%2C+unknown+function	0	0	3.3	0	0	0	0	0	0	3.3	0
PF3D7_0512900	chr5	553990	554787	+	555000	124506177	conserved+Plasmodium+protein%2C+unknown+function	7.3	24.5	30.7	29.3	14.9	19.4	0	0	3.1	129.2	0
PF3D7_0513000	chr5	555264	556073	+	555000	Q8I3X7	conserved+Plasmodium+protein%2C+unknown+function	10	9.1	56	45.3	51.2	1.9	2.4	703.6	21.9	901.4	0
PF3D7_0513100	chr5	557039	558012	-	555000	C0H4D5	conserved+Plasmodium+protein%2C+unknown+function	0	0.5	0	3.2	1.1	0.1	0	34.1	0	39	1
PF3D7_0513200	chr5	559513	568384	+	565000	XP_001351689.1	conserved+Plasmodium+protein%2C+unknown+function	135.2	129.7	227.3	118.9	143.5	70.5	14	36.4	46.9	922.4	0
PF3D7_0513300	chr5	569182	569919	-	565000	PNP	purine+nucleoside+phosphorylase+%28PNP%29	2296.2	1550	3932.6	2948.4	2742.7	1402.8	133.2	346.4	77.7	15430	0
PF3D7_0513400	chr5	571058	572661	-	575000	MAL5P1.134	GTP+binding+protein%2C+putative	23	51	55.7	60.3	39.7	19.8	10	38.4	73.5	371.4	0
PF3D7_0513500	chr5	573588	574248	+	575000	PF3D7_0513500	mitochondrial+matrix+protein%2C+putative	48	68.6	114.7	35	16.2	0	10.1	47.4	4.9	344.9	0
PF3D7_0513600	chr5	574941	578505	-	575000	MAL5P1.136	deoxyribodipyrimidine+photolyase+%28photoreactivating+enzyme%2C+DNA+photolyase%29%2C+putative	13.7	106.9	264.7	237.8	190.9	120.3	11.4	336.3	44.8	1326.8	0
PF3D7_0513700	chr5	581227	584124	+	585000	XP_002808688.1	secreted+ookinete+protein%2C+putative+%28PSOP12%29	3.6	7.1	1.4	6.9	3.8	0	1.6	180.2	4.8	209.4	1
PF3D7_0513800	chr5	585357	585980	-	585000	AAF15358.1	Rab+GTPase+1a+%28RAB1a%29	0	41.1	161.6	162.8	171.3	64.4	10.8	628.2	60.7	1300.9	0
PF3D7_0513900	chr5	587752	588677	+	585000	Q8I3W8	conserved+Plasmodium+protein%2C+unknown+function	5.6	45.7	113.5	89.6	72.7	21.6	31.1	162.7	28.8	571.3	0
PF3D7_0514000	chr5	588921	590769	-	585000	812955	tubulin-tyrosine+ligase%2C+putative+%28TTL%29	8.4	7.8	25.8	49.7	114.5	44.5	5.6	243.2	179.6	679.1	0
PF3D7_0514100	chr5	591338	595663	-	595000	dnareplication	helicase%2C+belonging+to+UvrD+family%2C+putative	0	7.3	22.4	40.3	57.7	13.6	0	92.1	75.7	309.1	0
PF3D7_0514200	chr5	596818	599421	+	595000	XP_001351700.1	conserved+Plasmodium+protein%2C+unknown+function	25.8	2.8	23.8	25.8	40.2	25.3	5.1	13	19.1	180.9	0
PF3D7_0514300	chr5	600047	603433	+	605000	11738814	aspartyl-tRNA+synthetase%2C+putative	6.4	8	33.5	37.2	17.9	0	0	21.1	0	124.1	0
PF3D7_0514500	chr5	605027	606330	-	605000	812959	conserved+Plasmodium+membrane+protein%2C+unknown+function	112.9	257.5	194.4	285.8	155	219.6	216.1	2410.3	201.9	4053.5	1
PF3D7_0514600	chr5	607105	608451	-	605000	MAL5P1.146	ribose+5-phosphate+epimerase%2C+putative	313.1	256.5	497.2	289.6	170.6	63	40	702.6	69.2	2401.8	0
PF3D7_0514700	chr5	610089	614771	+	615000	PFE0735w	conserved+Plasmodium+protein%2C+unknown+function	0.6	0	0.5	1.8	0	0	4.6	11.7	0	19.2	0
PF3D7_0514800	chr5	615282	617993	-	615000	CAD51512.1	kinase%2C+putative	3.2	7.9	4.8	9.5	11.3	3.7	0	0	3.5	43.9	0
PF3D7_0514900	chr5	618629	619945	+	615000	XP_001351706.1	conserved+Plasmodium+protein%2C+unknown+function	17	6.7	17.8	16.4	5.3	0	0	28.9	0	92.1	0
PF3D7_0515000	chr5	620810	623356	-	625000	XP_001351707.1	RNA+recognition+motif%2C+putative	69.1	42.3	89.8	49.6	46.4	25.9	0	53.1	7.3	383.5	0
PF3D7_0515100	chr5	624719	626481	-	625000	PFE0755c	rhomboid+protease+ROM9+%28ROM9%29	18.2	20.6	64.6	20.4	25.6	19.8	31.3	43.5	29.7	273.7	0
PF3D7_0515200	chr5	627298	627961	+	625000	812966	conserved+Plasmodium+protein%2C+unknown+function	0	0	2.7	0	0	0	29.9	5	0	37.6	0
PF3D7_0515300	chr5	628981	635382	+	635000	Q8I3V5	phosphatidylinositol+3-kinase+%28PI3K%29	22.5	31.8	69.8	94.2	133.3	68.1	7.5	67.4	51.5	546.1	0
PF3D7_0515400	chr5	637354	640381	+	635000	PF3D7_0515400	conserved+Plasmodium+protein%2C+unknown+function	0.1	0	0	0	14.2	6.6	0	39.9	14.2	75	0
PF3D7_0515500	chr5	641137	644685	-	645000	PFE0775c	amino+acid+transporter%2C+putative	11.7	9.4	20.5	39.5	49.1	53.6	24.7	402.6	74.7	685.8	1
PF3D7_0515600	chr5	646659	652106	+	645000	12368867	conserved+Plasmodium+protein%2C+unknown+function	0	0	0	7.2	0	0	12.5	92	18.1	129.8	1
PF3D7_0515700	chr5	653966	655336	-	655000	12368867	glideosome-associated+protein+40%2C+putative+%28GAP40%29	9.1	12.9	49.5	229.1	766.6	569.1	13	288.3	32.8	1970.4	0
PF3D7_0515800	chr5	658423	658677	-	655000	PFE0790c	BolA-like+protein%2C+putative	54.1	102.5	145.3	96.9	96.1	39.9	38.1	285.8	35.8	894.5	0
PF3D7_0515900	chr5	660150	661136	-	665000	12368867	protein+phosphatase%2C+putative	21.1	76.2	194.5	170	202.5	252.1	20.5	74.3	45.9	1057.1	0
PF3D7_0516000	chr5	663551	666917	+	665000	CAD51524.1	RAP+protein%2C+putative	8.8	19.9	116.1	35.5	31.5	9.5	0	193.5	4.3	419.1	0
PF3D7_0516100	chr5	667486	674861	+	675000	Q8I3U7	cation-transporting+ATPase+1+%28ATPase1%29	20.7	13.7	43.1	54.1	67.6	29.5	30.7	130.9	25.2	415.5	0
PF3D7_0516200	chr5	675809	676614	-	675000	ribosomeStruct	40S+ribosomal+protein+S14%2C+putative	1377.8	1177.6	1155.3	840.7	609	284.9	391.8	642	168.7	6647.8	0
PF3D7_0516300	chr5	678910	680955	+	675000	CAD51527.1	tRNA+pseudouridine+synthase%2C+putative	706.4	851.2	998.7	499.2	280.1	116.9	173.6	897.3	136.4	4659.8	0
PF3D7_0516400	chr5	681430	682437	-	685000	CAD51528.1	conserved+Plasmodium+protein%2C+unknown+function	21.4	16.2	42	26.2	42.8	12.5	8.4	278.3	29.1	476.9	0
PF3D7_0516500	chr5	683708	685859	+	685000	CAX63963.1	metabolite%2Fdrug+transporter%2C+putative	14.1	20.4	23.1	36.7	63.5	40.7	40.5	1033.5	287.5	1560	1
PF3D7_0516600	chr5	686810	691642	-	685000	XP_001351723.1	translation+initiation+factor+IF-2%2Csporozoite+surface+antigen+MB2+%28MB2%29	7.7	6	36.7	20.1	12.7	0	0.6	20	7.2	111	0
PF3D7_0516700	chr5	694492	698778	+	695000	XP_001351724.1	ubiquitin+carboxyl-terminal+hydrolase+2%2C+putative	2.9	0.8	0	0	2.9	0	0	0	0	6.6	0
PF3D7_0516800	chr5	700120	707256	-	705000	Q8I3U0	transcription+factor+with+AP2+domain%28s%29+%28ApiAP2%29	3.3	10.4	11.3	40.1	32.4	45.9	8.6	231.6	9.7	393.3	0
PF3D7_0516900	chr5	712762	713772	-	715000	23504655	60S+ribosomal+protein+L8%2C+putative	4899.9	4487.3	5261.5	3475	2317.1	1147.1	967.5	998.5	434	23987.9	0
PF3D7_0517000	chr5	715765	716675	-	715000	12368867	60S+ribosomal+protein+L12%2C+putative	566.1	358.1	404.6	441.9	388.8	271.6	450.4	265.8	565.3	3712.6	0
PF3D7_0517100	chr5	718425	719855	-	715000	PF3D7_0517100	conserved+Plasmodium+protein%2C+unknown+function	9.5	14.2	29	32.8	9.3	23.4	111.6	17.7	30.1	277.6	0
PF3D7_0517200	chr5	720743	722641	-	725000	PFE0860c	conserved+Plasmodium+protein%2C+unknown+function	18.1	12.6	1.9	9.7	17.9	23.3	133.2	164.5	57.1	438.3	0
PF3D7_0517300	chr5	724681	725751	-	725000	12368867	pre-mRNA-splicing+factor+%28SR1%29	1648.7	863.3	1032.4	739	568.6	508.5	2962.3	291.4	144.7	8758.9	0
PF3D7_0517400	chr5	731407	735162	+	735000	12368867	FACT+complex+subunit+SPT16%2C+putative%3Bwith%3DGeneDB%3APBANKA_123220+%28FACT-L%29	71.8	75.7	263.7	201.3	172.8	69.1	40.1	193.1	76	1163.6	0
PF3D7_0517500	chr5	735887	738400	-	735000	PFE0875c	conserved+Plasmodium+protein%2C+unknown+function	17.1	11.3	23.1	8.1	37.6	12.7	38.3	335	74.7	557.9	1
PF3D7_0517600	chr5	740156	741034	-	745000	PFE0880c	f-actin+capping+protein+beta+subunit%2C+putative+%28CP%29	8.7	0	0	1.3	0	0	0	79.6	100.8	190.4	1
PF3D7_0517700	chr5	743179	745329	+	745000	PF3D7_0517700	eukaryotic+translation+initiation+factor%2C+putative	871.3	558.7	1113.6	736.4	494.4	190.4	167.1	320.8	177.5	4630.2	0
PF3D7_0517800	chr5	745798	746634	-	745000	12368867	apicortin%2C+putative	8.9	13.1	15.1	20.4	18	27.3	29.9	2440.7	53.2	2626.6	1
PF3D7_0517900	chr5	747795	749677	-	745000	12368867	zinc+finger+protein%2C+putative	11.8	5.3	9	14.3	54.5	57.9	22	156.3	3.2	334.3	0
PF3D7_0518000	chr5	750661	752435	+	755000	12368867	conserved+protein%2C+unknown+function	55	76.5	73.3	81.7	65.7	70.8	26.5	241.8	34	725.3	0
PF3D7_0518100	chr5	753298	757544	+	755000	PFE0905w	RAP+protein%2C+putative	38.9	85.7	172.3	196.2	150	55.3	0	334	143.6	1176	0
PF3D7_0518200	chr5	758503	758898	-	755000	C0H4E7	conserved+Plasmodium+protein%2C+unknown+function	0	0	0	22.8	50.4	42.6	0	57.3	0	173.1	0
PF3D7_0518300	chr5	759831	760998	-	765000	PFE0915c	proteasome+subunit+beta+type+1%2C+putative	363.5	540.9	1256.6	1318.9	1076.7	594.2	75.2	215.1	113.3	5554.4	0
PF3D7_0518400	chr5	762103	762792	-	765000	PFE0920c	cyclin+%28CYC3%29	2.7	0	10.6	9.3	22.1	0	8	103.7	44.4	200.8	1
PF3D7_0518500	chr5	763532	766903	-	765000	PF3D7_0518500	ATP-dependent+RNA+helicase+DDX23%2C+putative+%28DDX23%29	92.7	86.8	155.7	165.5	151.9	57.6	13.8	217.2	181.4	1122.6	0
PF3D7_0518600	chr5	769310	773140	+	775000	Q8I3S4	WD-repeat+protein%2C+putative	5.7	6.4	32.1	81	144.8	67.3	9	622.8	263.1	1232.2	0
PF3D7_0518700	chr5	774075	780438	-	775000	PUF1	mRNA-binding+protein+PUF1+%28PUF1%29	9.3	0	0	0	6.4	0	6.1	74.2	14.2	110.2	1
PF3D7_0518800	chr5	783638	784991	-	785000	225631687	secreted+ookinete+protein%2C+putative+%28PSOP13%29	0	16.1	5.8	18.7	0	4.6	8.6	517.9	2.4	574.1	1
PF3D7_0518900	chr5	785664	786565	-	785000	PF3D7_0518900	conserved+Plasmodium+protein%2C+unknown+function	0	0	0	0	0	0	0	24.5	260.7	285.2	1
PF3D7_0519000	chr5	788599	789480	+	785000	MAL5P1.191	conserved+Plasmodium+protein%2C+unknown+function	0	9.1	82	39.8	35	0.5	0	24.5	14.2	205.1	0
PF3D7_0519100	chr5	790399	790773	+	795000	PFE0960w	mitochondrial+ribosomal+protein+L14+precursor%2C+putative	0	0	20.1	33.3	22.2	0	0	30	91.9	197.5	0
PF3D7_0519200	chr5	791719	792936	-	795000	transporters	vacuolar+ATP+synthetase	2141.4	2158.6	2691.5	2674.2	2549.1	1208.3	1411	3126.9	3531.8	21492.8	0
PF3D7_0519300	chr5	795527	797473	+	795000	813009	cytochrome+c+oxidase+assembly+protein+%28heme+A%3A+farnesyltransferase%29%2C+putative	18.6	41.5	108.7	163.2	113.3	61.7	38.4	144.2	79.3	768.9	0
PF3D7_0519400	chr5	798036	798775	-	795000	124506309	40S+ribosomal+protein+S24%2C+putative	494.2	333.4	714.1	410.4	342.6	145.3	176.8	120.8	237.2	2974.8	0
PF3D7_0519500	chr5	801450	809127	-	805000	Factors	carbon+catabolite+repressor+protein+4%2C+putative+%28CCR4%29	0	2.7	1.4	7.5	6.6	0	0	0	12.7	30.9	0
PF3D7_0519600	chr5	812648	814915	+	815000	124506313	conserved+Plasmodium+protein%2C+unknown+function	17.1	12.4	43.1	22.3	23.7	8.1	0	13.1	0.2	140	0
PF3D7_0519700	chr5	817066	819139	+	815000	225631689	conserved+Plasmodium+protein%2C+unknown+function	8	0	5.7	23.3	5.1	0	17.4	0	4.8	64.3	0
PF3D7_0519800	chr5	820719	822908	-	825000	MAL5P1.199	conserved+protein%2C+unknown+function	443.3	351.6	436.4	288.8	200	131.5	44.1	203.2	327.5	2426.4	0
PF3D7_0519900	chr5	825835	827412	-	825000	124506319	conserved+Plasmodium+protein%2C+unknown+function	5.5	27	56.8	20.3	30	18.6	3.3	111.4	30.1	303	0
PF3D7_0520000	chr5	828953	829883	+	825000	PFE1005w	40S+ribosomal+protein+S9%2C+putative	585.3	476.9	959.3	738.4	360.4	220	130.4	123.4	256.4	3850.5	0
PF3D7_0520100	chr5	831617	834343	+	835000	296004568	protein+phosphatase%2C+putative	67	74.2	117.1	61.1	54.9	9.6	16.3	72.2	3.5	475.9	0
PF3D7_0520200	chr5	835314	837407	-	835000	12368867	conserved+Plasmodium+protein%2C+unknown+function	2.1	3.9	13.4	0	0	0	0	0	0	19.4	0
PF3D7_0520300	chr5	838428	839083	+	835000	23504690	U6+snRNA-associated+sm-like+protein+lsm2%2C+putative+%28LSM2%29	186.5	125.7	303.5	211	84.9	58.1	0	141.1	12.8	1123.6	0
PF3D7_0520400	chr5	839655	840560	-	845000	PFE1025c	conserved+Plasmodium+protein%2C+unknown+function	0	6	77.1	71.9	60.7	3.8	0	6.9	67.9	294.3	0
PF3D7_0520500	chr5	841723	842655	-	845000	thiaminemetpath	phosphomethylpyrimidine+kinase%2C+putative	12	11.4	87.6	103.2	119.4	59	8.5	36.4	110.5	548	0
PF3D7_0520600	chr5	843586	844817	-	845000	PFE1035c	BIS%285%27-nucleosyl%29-tetraphosphatase+%28diadenosine+tetraphosphatase%29%2C+putative	943.2	639.5	768.9	477.7	259.7	168.3	329.7	71.1	25.2	3683.3	0
PF3D7_0520700	chr5	845843	848767	-	845000	PF3D7_0520700	conserved+Plasmodium+protein%2C+unknown+function	20.9	18.4	50.6	22.8	19.8	3.7	1.5	24.7	11.6	174	0
PF3D7_0520800	chr5	849862	856026	-	855000	PF3D7_0520800	conserved+Plasmodium+protein%2C+unknown+function	0.2	0	15.2	8.5	8.2	0	0	0	0	32.1	0
PF3D7_0520900	chr5	857038	858477	+	855000	PF3D7_0520900	S-adenosyl-L-homocysteine+hydrolase+%28SAHH%29	526.7	402.1	1202.6	1113.3	1285.3	633.3	24.8	55.5	39.6	5283.2	0
PF3D7_0521000	chr5	859373	861063	-	865000	Q8I3Q2	conserved+Plasmodium+protein%2C+unknown+function	80.5	34.4	130.2	95.2	110.9	13.7	31.7	218.7	59.9	775.2	0
PF3D7_0521100	chr5	861930	867583	-	865000	CAD51576.1	conserved+Plasmodium+protein%2C+unknown+function	4.6	2.5	6.4	15.6	51.1	15.2	23.7	15.9	1.6	136.6	0
PF3D7_0521200	chr5	868892	869878	+	865000	12368867	conserved+Plasmodium+protein%2C+unknown+function	0	0	2.2	0	5.7	0	0	37.3	0	45.2	0
PF3D7_0521300	chr5	870184	874570	-	875000	PFE1070c	conserved+Plasmodium+protein%2C+unknown+function	9.1	0	4.1	0	0	0	0	3.4	23.7	40.3	0
PF3D7_0521400	chr5	875873	877561	-	875000	Q8I3P8	conserved+Plasmodium+protein%2C+unknown+function	0	0.3	3.3	7.9	0	0	0	0.3	0	11.8	0
PF3D7_0521500	chr5	878068	879762	+	875000	813031	ribosomal+large+subunit+pseudouridylate+synthase%2C+putative	3.2	25.8	53.2	57.8	41.7	10.2	1.8	107.6	10.8	312.1	0
PF3D7_0521700	chr5	882376	884901	+	885000	12368867	DEAD%2FDEAH+box+ATP-dependent+RNA+helicase%2C+putative	41.8	8.6	50.9	33	18.5	18.1	4.3	31.2	53.7	260.1	0
PF3D7_0521800	chr5	885714	888232	+	885000	PFE1090w	nucleotide+binding+protein%2C+putative	0	0	0	4.8	0	0	0	0.2	0	5	0
PF3D7_0521900	chr5	888657	895144	+	895000	813034	conserved+Plasmodium+protein%2C+unknown+function	0	0	1.2	0	0	0	0	3.5	0	4.7	0
PF3D7_0522000	chr5	896018	896940	+	895000	PFE1100w	conserved+Plasmodium+protein%2C+unknown+function	154.8	86.4	237.1	131	109.1	34.5	67.2	191.4	264.6	1276.1	0
PF3D7_0522100	chr5	897465	899756	-	895000	XP_001351778.1	conserved+Plasmodium+protein%2C+unknown+function	0	0	0	0	8.9	0	0	0	0	8.9	0
PF3D7_0522200	chr5	901414	902173	+	905000	23504708	conserved+Plasmodium+protein%2C+unknown+function	90.7	19	41.1	35.7	57.3	20.2	13.5	62.3	36.2	376	0
PF3D7_0522300	chr5	902613	904844	-	905000	XP_002808708.1	S-adenosylmethionine-dependent+methyltransferase%2C+putative	189.8	172.2	216.1	88.4	129.9	71.8	36.9	44.9	96.6	1046.6	0
PF3D7_0522400	chr5	907837	936315	+	925000	PF3D7_0522400	conserved+Plasmodium+protein%2C+unknown+function	11.3	7.7	36.6	184.5	488	278.6	1.3	200	25.7	1233.7	0
PF3D7_0522500	chr5	937231	938037	+	935000	296004582	mitochondrial+ribosomal+protein+L17+precursor%2C+putative	0.1	5.9	10.6	6	14.9	1.5	5.9	50.1	47.2	142.2	0
PF3D7_0522600	chr5	940249	941700	+	945000	23504712	conserved+protein%2C+unknown+function	17	3	25.4	141.5	491.6	738.9	9.6	138.9	162.8	1728.7	0
PF3D7_0522700	chr5	942767	943873	+	945000	PF3D7_0522700	iron-sulfur+assembly+protein%2C+putative+%28SufA%29	0	0	6.7	17.3	1.2	0	0	43.3	2.1	70.6	0
PF3D7_0522800	chr5	944184	944931	-	945000	XP_001351785.1	G10+protein%2C+putative	98.4	46.6	102.5	73.4	40.5	9.2	5.8	31.5	7.8	415.7	0
PF3D7_0522900	chr5	948951	953609	+	955000	PF3D7_0522900	zinc+finger+protein%2C+putative	0.7	0	0	0	0	0	0	35.8	0	36.5	0
PF3D7_0523000	chr5	957890	962149	+	965000	PF3D7_0523000	multidrug+resistance+protein+%28MDR1%29	533.1	228	420.7	218.7	144	235.1	1222.1	753.2	3.2	3758.1	0
PF3D7_0523100	chr5	963227	965044	-	965000	12368867	mitochondrial+processing+peptidase+alpha+subunit%2C+putative	64.4	97.6	256.5	178.4	105.3	62.1	26.8	77.9	26.5	895.5	0
PF3D7_0523200	chr5	966123	969737	+	965000	PFE1160w	conserved+Plasmodium+protein%2C+unknown+function	28.9	40	87.8	71.6	39.6	31	6.7	31.6	12	349.2	0
PF3D7_0523300	chr5	970266	970962	-	975000	12368867	conserved+Plasmodium+protein%2C+unknown+function	34.4	50.3	140.2	172.6	179.3	142.3	20.9	236.4	68.9	1045.3	0
PF3D7_0523400	chr5	973518	975876	+	975000	Pf_chaperones	DnaJ+protein%2C+putative	21.1	29.9	68.5	56.7	101.8	37.7	0.8	26	19.9	362.4	0
PF3D7_0523600	chr5	978665	979870	+	975000	PFE1175w	conserved+Plasmodium+protein%2C+unknown+function	0	0	0	0	0	0	0	6.9	0.1	7	0
PF3D7_0523700	chr5	980754	985354	-	985000	MAL5P1.236	conserved+Plasmodium+membrane+protein%2C+unknown+function	0	0	0	0	0	0	0	0	0	0	0
PF3D7_0523800	chr5	990005	992059	+	995000	PF3D7_0523800	transporter%2C+putative	22.6	2	0	5.3	8.6	0	0	18.3	18.2	75	0
PF3D7_0523900	chr5	993433	994607	-	995000	PFE1190c	conserved+Plasmodium+membrane+protein%2C+unknown+function	411.2	156.1	114.4	112.1	146.1	163.8	176.8	28.7	60.4	1369.6	0
PF3D7_0524000	chr5	998753	1002124	+	1005000	AAO85775.1	karyopherin+beta+%28KASbeta%29	1372.8	1016.3	1576.6	1131.7	1140.6	646.1	1037.2	96.3	131.6	8149.2	0
PF3D7_0524100	chr5	1004237	1008108	+	1005000	PF3D7_0524100	conserved+Plasmodium+protein%2C+unknown+function	5.8	0	0	0	12.1	7	0	3.1	7	35	0
PF3D7_0524200	chr5	1008636	1009404	-	1005000	813056	conserved+Plasmodium+membrane+protein%2C+unknown+function	15.1	14.6	27.5	26.9	46.1	50.9	37.6	80.6	141.1	440.4	1
PF3D7_0524300	chr5	1010951	1012171	-	1015000	CAD51606.1	conserved+Plasmodium+protein%2C+unknown+function	30.5	15.4	38.9	36.1	43.4	0	0	25.4	0	189.7	0
PF3D7_0524400	chr5	1013453	1014550	-	1015000	813058	cytosolic+preribosomal+GTP-binding+protein%2C+putative	106.1	107.7	101.9	68.4	64.2	67.8	71.5	30	100	717.6	0
PF3D7_0524500	chr5	1016198	1016569	+	1015000	PF3D7_0524500	conserved+Plasmodium+protein%2C+unknown+function	13.8	5	15.9	15.8	55.3	9.5	6.3	2.4	0	124	0
PF3D7_0524600	chr5	1017809	1018582	+	1015000	CAD51609.1	organelle+ribosomal+protein+L7%2FL12+precursor%2C+putative	0	11.7	22.7	27.1	35.2	26.4	4.7	73.7	0	201.5	0
PF3D7_0524700	chr5	1019585	1019902	-	1015000	124506411	mitochondrial+import+receptor+subunit+tom22%2C+putative	273.5	608.1	1075	720.5	329.9	147	50.5	758.9	162.5	4125.9	0
PF3D7_0524800	chr5	1021408	1024307	-	1025000	Q8I3L7	ubiquitin+fusion+degradation+protein+UFD1%2C+putative	6.7	0	13.2	0	11.8	17.6	0	34.9	0	84.2	1
PF3D7_0524900	chr5	1027396	1030362	+	1025000	XP_001351805.1	tRNA-YW+synthesizing+protein%2C+putative	281.3	223.2	317.7	151.1	82.6	36.8	16.3	235.7	61.6	1406.3	0
PF3D7_0525000	chr5	1036229	1038343	+	1035000	CAD51613.1	zinc+finger+protein%2C+putative	130.8	560.6	862.9	445.4	296.5	117.3	10.9	462.9	106.8	2994.1	0
PF3D7_0525100	chr5	1041745	1043766	+	1045000	adenylyl	acyl-CoA+synthetase+%28ACS10%29	1011.6	632.6	1180.4	1104.4	1386.2	1487.7	2390	1209.7	346.6	10749.2	0
PF3D7_0525200	chr5	1045462	1051253	+	1045000	PFE1255w	conserved+Plasmodium+protein%2C+unknown+function	6.1	5.1	89.1	102.4	166.4	76.3	49.3	67	30.8	592.5	0
PF3D7_0525300	chr5	1052468	1053913	-	1055000	12368867	conserved+Plasmodium+protein%2C+unknown+function	5.8	11.4	24.3	42.8	143.3	152.1	12.3	477.4	42.3	911.7	0
PF3D7_0525400	chr5	1057651	1059054	+	1055000	Q8I3L1	G-protein+coupled+receptor%2C+putative	6.2	13.1	18.8	22.5	30.9	5	16.6	46.2	7.8	167.1	0
PF3D7_0525500	chr5	1059918	1065509	-	1065000	813069	conserved+Plasmodium+protein%2C+unknown+function	84.1	87	131.9	48.4	33.7	41	5.8	33.6	12.4	477.9	0
PF3D7_0525600	chr5	1066526	1067712	-	1065000	PFE1275c	RNA+methyltransferase%2C+putative	4.7	15	142	155.2	103.4	48.7	14	215.3	48	746.3	0
PF3D7_0525700	chr5	1068516	1069285	+	1065000	PF3D7_0525700	conserved+Plasmodium+protein%2C+unknown+function	0	85.4	152.4	228	222.7	163.7	19.8	43.7	50.6	966.3	0
PF3D7_0525800	chr5	1071247	1072149	+	1075000	Q8I3K7	membrane+skeletal+protein+IMC1-related	65.3	17.2	32.3	67.1	483.5	752.1	66.9	238.8	320.5	2043.7	0
PF3D7_0525900	chr5	1073646	1075644	+	1075000	PF3D7_0525900	NIMA+related+kinase+2+%28NEK2%29	7.5	7.1	0	3.7	0	12.5	0	708.2	18.2	757.2	0
PF3D7_0526000	chr5	1075913	1078333	-	1075000	XP_001351816.1	RAP+protein%2C+putative	0	18.2	30.7	49.6	40.1	14.9	0	72.7	111.4	337.6	0
PF3D7_0526100	chr5	1079779	1081008	+	1085000	813076	conserved+Plasmodium+membrane+protein%2C+unknown+function	0	0	0	0	0	0	0	106.1	0	106.1	1
PF3D7_0526200.1	chr5	1081558	1083816	-	1085000	12368867	ADP-ribosylation+factor+GTPase-activating+protein%2C+putative	3.8	28.1	164.4	196.9	254.8	147.7	15.3	390.4	189.1	1390.5	0
PF3D7_0526300	chr5	1085623	1086594	-	1085000	XP_001351819.1	nucleolar+Jumonji+domain+interacting+protein%2C+putative	182.6	84.8	122.1	73.8	68.1	31.3	24.2	161.7	72.5	821.1	0
PF3D7_0526400	chr5	1088423	1089508	+	1085000	PF3D7_0526400	conserved+Plasmodium+protein%2C+unknown+function	0	6.6	11.8	7.5	22.2	14	2.5	20.7	21.2	106.5	0
PF3D7_0526500	chr5	1090930	1095084	+	1095000	PF3D7_0526500	conserved+Plasmodium+protein%2C+unknown+function	137.9	68.9	126.7	69.7	70.6	34.3	34.8	57.8	16.4	617.1	0
PF3D7_0526600	chr5	1101203	1114777	+	1105000	MAL5P1.265	conserved+Plasmodium+protein%2C+unknown+function	0	0	2.5	0	1.6	0	1.6	3.8	2.1	11.6	0
PF3D7_0526700	chr5	1117261	1119651	-	1115000	PFE1330c	conserved+Plasmodium+protein%2C+unknown+function	5.1	17.7	59.9	57	50.6	0	0	73	0	263.3	0
PF3D7_0526800	chr5	1120704	1121810	-	1125000	124506453	conserved+Plasmodium+protein%2C+unknown+function	254.1	240.1	405.7	195.5	171.1	57.9	48.9	142	187.3	1702.6	0
PF3D7_0526900	chr5	1123610	1124595	+	1125000	XP_001351825.1	conserved+Plasmodium+protein%2C+unknown+function	32.2	1.6	6.4	9	6.2	0.7	5.3	21.1	33.4	115.9	1
PF3D7_0527000	chr5	1125099	1128146	-	1125000	replicationForm	minchromosome+maintenance+%28MCM%29+complex+subunit%2C+putative+%28MCM3%29	5.8	13.4	183.5	230.4	316.2	134.9	10.7	445.4	242.4	1582.7	0
PF3D7_0527100	chr5	1129959	1130754	-	1135000	124506459	ubiquitin-conjugating+enzyme+E2+N%2C+putative+%28UBC13%29	457.2	473.7	757.4	945.5	823.4	363.7	68.8	571.6	58.5	4519.8	0
PF3D7_0527200	chr5	1132937	1134854	-	1135000	proteasome_new	ubiquitin+carboxyl-terminal+hydrolase%2C+putative	64.6	95.7	201.3	144	160.9	101.7	15.4	48.6	9.3	841.5	0
PF3D7_0527300	chr5	1135976	1137870	-	1135000	296004596	methionine+aminopeptidase+1a%2C+putative+%28MetAP1a%29	142.3	130.8	302.6	198.7	134.1	113.6	82.8	191.1	106.5	1402.5	0
PF3D7_0527400	chr5	1140627	1141154	+	1145000	XP_001351830.1	conserved+Plasmodium+protein%2C+unknown+function	189.3	49.5	89.4	34.3	29.5	61.7	120.9	61	47.6	683.2	0
PF3D7_0527500	chr5	1143618	1145359	+	1145000	12368867	hsp70+interacting+protein%2C+putative	563.4	530.9	1259.4	585.1	475	239.9	239.3	486.9	1013.5	5393.4	0
PF3D7_0527600	chr5	1145857	1148810	-	1145000	PF3D7_0527600	conserved+Plasmodium+protein%2C+unknown+function	43.9	84.7	136.5	115.3	146.4	86.2	2.8	213.4	9.6	838.8	0
PF3D7_0527900	chr5	1153676	1155673	+	1155000	Ribosomegenes	RNA+helicase+1	175.2	122.5	157	114.2	89	50.5	18.9	59.8	61.5	848.6	0
PF3D7_0528000	chr5	1156205	1156579	-	1155000	PFE1395c	conserved+Plasmodium+protein%2C+unknown+function	31.2	34.4	84.1	45.1	58	10	0	176.4	0.8	440	0
PF3D7_0528100	chr5	1157840	1161553	-	1155000	XP_001351835.2	beta+adaptin+protein%2C+putative	230.3	182.2	338.1	281.8	346.1	324.3	212.6	236	444.6	2596	0
PF3D7_0528200	chr5	1163408	1165072	-	1165000	CAD51643.1	eukaryotic+translation+initiation+factor+3%2C+subunit+6%2C+putative	40.2	11.7	60.1	21.2	37.7	12.8	4.2	20.9	0.6	209.4	0
PF3D7_0528300	chr5	1166520	1168010	-	1165000	813096	conserved+Plasmodium+protein%2C+unknown+function	0	0	0	0	19.7	32.2	0	0	0	51.9	0
PF3D7_0528400	chr5	1171659	1173890	+	1175000	PFE1415w	cell+cycle+regulator+with+zn-finger+domain%2C+putative	18.6	3.5	17.4	94.8	449.3	566.4	21	1172.4	753.6	3097	0
PF3D7_0528500	chr5	1174907	1177067	+	1175000	actin	f-actin+capping+protein+alpha+subunit%2C+putative	10.7	3.9	19.9	40.6	43.2	14.9	0.4	264.3	0	397.9	0
PF3D7_0528600	chr5	1176969	1177286	-	1175000	12368867	conserved+Plasmodium+protein%2C+unknown+function	891.9	747.5	905.7	707.2	438.2	508.9	1237.5	1833.8	1498.2	8768.9	0
PF3D7_0528700	chr5	1178276	1178890	-	1175000	662803	peptidyl-prolyl+cis-trans+isomerase+%28CYP23%29	14	3.7	12.4	0	11.8	0.7	0	31	41.7	115.3	0
PF3D7_0528800	chr5	1180425	1182038	-	1185000	PFE1435c	nucleolar+preribosomal+GTPase%2C+putative	67.1	37.3	87.2	37.5	17.9	0.6	11.2	27.8	17.9	304.5	0
PF3D7_0528900	chr5	1183916	1185639	-	1185000	PFE1440c	conserved+Plasmodium+protein%2C+unknown+function	28.2	26.4	33.1	11.5	57.2	71.4	38.2	158.6	74.5	499.1	0
PF3D7_0529000	chr5	1186787	1188946	-	1185000	apicoplastgene	conserved+Plasmodium+protein%2C+unknown+function	240.2	106.4	210.2	225.8	191.6	211.8	101.4	102.2	443.8	1833.4	0
PF3D7_0529100	chr5	1191000	1191682	-	1195000	PF3D7_0529100	conserved+Plasmodium+protein%2C+unknown+function	0	0	0	2.7	0	0	0	0	0	2.7	0
PF3D7_0529200	chr5	1192973	1195332	+	1195000	PF3D7_0529200	sugar+transporter%2C+putative	9.1	17.8	32.5	30	46.3	34.8	12.1	84.7	288	555.3	0
PF3D7_0529300	chr5	1196315	1197389	+	1195000	CAD51654.1	apicoplast+TIC22+precursor+%28TIC22%29	1.7	0	0	12.7	27.3	0	0	37.2	42.8	121.7	0
PF3D7_0529400.1	chr5	1199165	1205187	+	1205000	PFE1465w	conserved+Plasmodium+protein%2C+unknown+function	0	4.4	18.6	48.6	78.1	27.3	0	36.6	25.4	239	0
PF3D7_0529500	chr5	1206473	1207679	+	1205000	Q8I3H2	cell+cycle+regulator+protein%2C+putative	5.7	0	8.3	2.2	0	0	0	0.4	0	16.6	0
PF3D7_0529700	chr5	1209006	1212102	-	1215000	CAD51657.1	conserved+Plasmodium+protein%2C+unknown+function	0	0	20.6	7.5	10.7	0	0	17.4	1.6	57.8	0
PF3D7_0529800	chr5	1213533	1219376	+	1215000	813110	conserved+Plasmodium+protein%2C+unknown+function	1	3.4	57.3	79.9	80	48.3	7.3	48.6	106.5	432.3	0
PF3D7_0529900	chr5	1220777	1221992	-	1225000	Q8I3G9	RING+zinc+finger+protein%2C+putative	1027.1	656.4	917.2	787.2	816.2	904.5	920.3	631.3	847.3	7507.5	0
PF3D7_0530000	chr5	1224598	1224891	-	1225000	PFE1500c	conserved+Plasmodium+protein%2C+unknown+function	0	0	0	0	13.2	0	0	3.3	2.4	18.9	0
PF3D7_0530100	chr5	1226883	1227757	+	1225000	PFE1505w	SNARE+protein%2C+putative+%28SYN6%29	3.5	0	3.3	0	0	0	0	0	0	6.8	0
PF3D7_0530200	chr5	1229077	1230651	-	1225000	iTPT	triose+phosphate+transporter+%28iTPT%29	13.6	64.5	195.9	239.3	258.3	81.8	27.7	157.7	24.6	1063.4	0
PF3D7_0530300	chr5	1233401	1238086	+	1235000	PFE1515w	conserved+Plasmodium+membrane+protein%2C+unknown+function	6.4	3.5	4	11.4	18.6	14.3	0	63	6.4	127.6	0
PF3D7_0530400	chr5	1238633	1243987	-	1245000	124506521	conserved+Plasmodium+protein%2C+unknown+function	2.2	3	32.3	11.7	14.2	1.9	0	38.8	0	104.1	0
PF3D7_0530500	chr5	1244751	1248359	+	1245000	PF3D7_0530500	conserved+Plasmodium+membrane+protein%2C+unknown+function	0	0.3	0	0	0	0	0	30	11.3	41.6	0
PF3D7_0530600	chr5	1248368	1249961	-	1245000	PF3D7_0530600	XAP-5+DNA+binding+protein%2C+putative	32.4	21.6	42.1	23.4	46.1	7.4	0	53	0.6	226.6	0
PF3D7_0530700	chr5	1250737	1254190	+	1255000	MAL5P1.304	conserved+Plasmodium+protein%2C+unknown+function	11.8	24.2	35.2	22	18.8	12.9	0	29.7	6.6	161.2	0
PF3D7_0530800	chr5	1255221	1257254	+	1255000	PFE1540w	CPW-WPC+family+protein	8.4	21.9	21.1	45.9	36.4	14	6.4	4043.7	54.9	4252.7	1
PF3D7_0530900	chr5	1257723	1265750	-	1265000	124506531	formin+1%2C+putative	0	0	0	2.7	55.9	39.6	0	68.3	4.9	171.4	0
PF3D7_0531000	chr5	1267410	1269539	+	1265000	813122	conserved+Plasmodium+protein%2C+unknown+function	0	0	0	0	0	0	0	0	0	0	0
PF3D7_0531100	chr5	1270388	1278484	-	1275000	PFE1555c	conserved+Plasmodium+protein%2C+unknown+function	0.1	12.5	2	17.3	31.8	18.2	0	58.1	0	140	0
PF3D7_0531200	chr5	1279958	1280599	-	1285000	23504892	mitochondrial+ribosomal+protein+S16+precursor%2C+putative	0	5.8	28.1	18.9	14.7	2.9	0	152.5	0	222.9	0
PF3D7_0531300	chr5	1281289	1282254	+	1285000	PFE1565w	conserved+Plasmodium+protein%2C+unknown+function	0	0	9.2	6.9	23.3	5.2	6	39.8	0	90.4	0
PF3D7_0531400	chr5	1282591	1286106	-	1285000	12368867	conserved+Plasmodium+protein%2C+unknown+function	11.8	1	8.7	16.9	19.2	3.8	0.5	0	17.5	79.4	0
PF3D7_0532100	chr5	1301224	1301769	+	1305000	Q8I3F3	early+transcribed+membrane+protein+5+%28ETRAMP5%29	2387.3	3131.4	5238.2	2640	1566.2	1060.1	1519.3	40.8	599.4	18182.7	0
PF3D7_0532200	chr5	1303662	1304526	-	1305000	11738814	Plasmodium+exported+protein+%28PHISTc%29%2C+unknown+function	12.3	5.4	12.3	12.2	65.9	9.3	8.1	44.2	0	169.7	0
PF3D7_0532300	chr5	1308278	1309940	+	1305000	XP_001351871.1	Plasmodium+exported+protein+%28PHISTb%29%2C+unknown+function	1669	943.1	793.3	191.6	102.3	94.2	23	0.4	12.1	3829	0
PF3D7_0532400	chr5	1312471	1314154	+	1315000	23504898	Plasmodium+exported+protein+%28PHISTb%29%2C+unknown+function	296.1	136.3	390.9	101.5	70.2	25	0	0	0	1020	0
PF3D7_0532600	chr5	1318531	1319229	-	1315000	813132	Plasmodium+exported+protein%2C+unknown+function	15.2	60	78.1	31.3	30.5	4	3.9	4.7	3.9	231.6	0
PF3D7_0532700	chr5	1322400	1323087	-	1325000	cytoadherencescheme	erythrocyte+membrane+protein+1+%28PfEMP1%29%2C+pseudogene+%28VAR+pseudogene%29	0	0	0	0	0	0	0	0	0	0	0
PF3D7_0532900	chr5	1326245	1327429	+	1325000	813135	rifin+%28RIF%29	0	5	0.6	3.3	0	0	8.6	12.8	42.4	72.7	0
PF3D7_0533000	chr5	1329555	1330808	+	1335000	PFE1635w	rifin%2C+pseudogene	0	15.7	14.7	5.9	10.9	0	5.5	11.3	32.1	96.1	1
PF3D7_0533100	chr5	1333470	1342964	+	1335000	PF3D7_0533100	erythrocyte+membrane+protein+1+%28PfEMP1%29%2C+truncated+%28VAR1CSA%29	0.9	2.6	1.9	0	7.9	3.3	4.7	10.3	56.8	88.4	1
PF3D7_0600100	chr6	653	1432	-	5000	PFF0005c	erythrocyte+membrane+protein+1+%28PfEMP1%29%2C+pseudogene+%28VAR+pseudogene%29	10.3	3.3	0	0	0	0	3.8	0	28.1	45.5	0
PF3D7_0600200	chr6	3503	12835	+	5000	PfEMP1	erythrocyte+membrane+protein+1%2C+PfEMP1+%28VAR%29	26	12.1	4.6	3.6	10	4.6	12.4	15.2	25.4	113.9	0
PF3D7_0600300	chr6	15065	16410	-	15000	86170346	rifin+%28RIF%29	14.9	23.4	12.4	18.6	27.2	26.9	18.7	16.2	104.6	262.9	1
PF3D7_0600400	chr6	18586	22721	-	25000	2270.t00005	erythrocyte+membrane+protein+1+%28PfEMP1%29-like+protein+%28VAR-like%29	5	0	0	2.4	0	0	0	0	2.6	10	0
PF3D7_0600500	chr6	26557	27830	+	25000	2270.t00006	rifin+%28RIF%29	2.9	7.5	13	7	29.6	13.4	22.6	21.5	30.2	147.7	0
PF3D7_0600600	chr6	29618	31484	-	35000	3885679	erythrocyte+membrane+protein+1+%28PfEMP1%29%2C+pseudogene+%28VAR+pseudogene%29	8.9	23.3	15.5	16.2	21.8	27	33.7	32.6	104.2	283.2	0
PF3D7_0600700	chr6	31965	33244	-	35000	PFF0035c	rifin+%28RIF%29	11.3	13.8	10.1	6.5	7.2	9.1	30.5	9.4	71.3	169.2	1
PF3D7_0601600	chr6	68833	69693	-	65000	PF3D7_0601600	Tetratricopeptide+repeat+protein%2C+putative	1.8	0	8.4	0	0	0	0	7.1	1.8	19.1	0
PF3D7_0601700	chr6	70948	71935	+	75000	2270.t00297	Plasmodium+exported+protein+%28PHISTa%29%2C+unknown+function%2C+pseudogene	33.7	47.3	35.7	28.5	24.9	14.8	0	39.7	0.1	224.7	0
PF3D7_0602000	chr6	82609	86922	-	85000	12368867	conserved+Plasmodium+protein%2C+unknown+function	4.5	14.8	60.2	56	70.1	12.6	6	462.4	27.5	714.1	0
PF3D7_0602100	chr6	92506	96668	+	95000	Factors	ATP-dependent+RNA+helicase%2C+putative	60.9	20.2	62.1	12.4	1.6	0	0	52.9	4.3	214.4	0
PF3D7_0602400	chr6	101385	104561	-	105000	apicoplastgene	elongation+factor+G+%28EF-G%29	43.1	113.1	292.5	204.6	164.3	40.7	6.9	44.6	30.9	940.7	0
PF3D7_0602500	chr6	105503	106642	+	105000	46362257	geranylgeranyltransferase%2C+putative	158.5	353.4	734.6	497.9	313.9	111.1	27.9	81.7	77.2	2356.2	0
PF3D7_0602600	chr6	107037	111664	-	105000	86170439	conserved+Plasmodium+protein%2C+unknown+function	11.8	10.2	24.1	0.8	0	0	2.2	16.2	0	65.3	0
PF3D7_0602700	chr6	113824	115224	-	115000	86170444	conserved+Plasmodium+protein%2C+unknown+function	0	0	0	0	0	0	0	319.6	2.4	322	1
PF3D7_0602800	chr6	116084	118024	+	115000	MAL6P1.31	JmjC+domain+containing+protein+%28JmjC2%29	22.7	19.6	35.7	21.7	36.3	23.6	24.5	17.3	11.2	212.6	0
PF3D7_0602900	chr6	118638	120203	-	115000	C6KSM9	conserved+Plasmodium+protein%2C+unknown+function	29.9	6.2	14.8	13.8	31.8	16	5.9	94.1	20.1	232.6	0
PF3D7_0603000	chr6	122634	124412	+	125000	12368867	conserved+Plasmodium+protein%2C+unknown+function	41.6	17.3	24.7	24.6	53.5	32.6	4.8	87.3	12.2	298.6	0
PF3D7_0603100	chr6	125458	126816	-	125000	86170464	conserved+Plasmodium+protein%2C+unknown+function	0	7.7	40.9	29.5	27.5	15	5.8	143.7	2.1	272.2	0
PF3D7_0603200	chr6	128621	130036	+	125000	PFF0155w	mitochondrial+chaperone+BCS1%2C+putative	6	49.7	178.4	204.8	125	58.7	34.7	65.7	37.1	760.1	0
PF3D7_0603300	chr6	130329	132038	-	135000	12368867	dihydroorotate+dehydrogenase%2C+mitochondrial+precursor+%28DHODH%29	16.1	35.2	69	42.1	28.7	6.8	8.9	11.6	14.4	232.8	0
PF3D7_0603400	chr6	133150	136461	-	135000	74911696	conserved+Plasmodium+protein%2C+unknown+function	0.5	0	0	0	0	0	0	0	5	5.5	0
PF3D7_0603500	chr6	139193	140518	+	135000	PFF0170w	cation%2FH++antiporter+%28CHA%29	10.3	6.3	54.1	123	145.3	116.1	12.7	45.8	22.9	536.5	0
PF3D7_0603600	chr6	141418	148943	-	145000	PFF0175c	conserved+Plasmodium+protein%2C+unknown+function	0.6	0	18.3	10.2	27.9	20.6	8.2	64.8	17.4	168	1
PF3D7_0603700	chr6	151055	152386	+	155000	XP_966027.1	phenylalanyl-tRNA+synthetase+subunit%2C+putative	3.7	11.9	80.3	94.2	64	22.5	0	31.5	43.6	351.7	0
PF3D7_0603800	chr6	152541	160455	-	155000	C6KSN6	conserved+Plasmodium+protein%2C+unknown+function	17	19.2	56.2	69.4	57.6	53.4	27	42.3	50.4	392.5	0
PF3D7_0604000	chr6	163828	169860	-	165000	86170512	conserved+Plasmodium+protein%2C+unknown+function	0	0	5.6	3.9	0	0	0	0.3	0	9.8	0
PF3D7_0604100	chr6	171301	177240	-	175000	86170517	transcription+factor+with+AP2+domain%28s%29%2CSPE2-interacting+protein+%28SIP2%29	0	0	0	6.3	106.9	24.5	0	0	0	137.7	0
PF3D7_0604200	chr6	180936	181481	+	185000	PFF0205w	mitochondrial+ribosomal+protein+L41+precursor%2C+putative	10.1	67.2	139.2	104.4	127	36.8	13	44.4	7.5	549.6	0
PF3D7_0604300	chr6	182216	184537	+	185000	MAL6P1.46	conserved+Plasmodium+protein%2C+unknown+function	0	0	2.3	0	0	0	0	12.6	0	14.9	0
PF3D7_0604400	chr6	184892	185843	+	185000	11738814	conserved+Plasmodium+protein%2C+unknown+function	0	8.9	15.7	13.1	14	5.2	10.3	562	0.1	629.3	1
PF3D7_0604500	chr6	189012	198078	+	195000	PFF0220w	conserved+Plasmodium+protein%2C+unknown+function	430.7	304.4	412.3	314.6	288.3	265.2	283.9	222.8	301.8	2824	0
PF3D7_0604600	chr6	198862	204355	+	205000	PF3D7_0604600	DNA+helicase%2C+putative	0	0	13	3.9	7.5	0	0	0.2	0	24.6	0
PF3D7_0604700	chr6	204640	206207	-	205000	46362279	glyoxalase+I+%28GILP%29	10.1	7.1	80.8	128.6	130.1	28.3	4	46.4	31	466.4	0
PF3D7_0604800	chr6	206855	211159	-	205000	PFF0235c	RAP+protein%2C+putative	0	3.1	41.7	22.9	4.2	0	0	42.5	4.2	118.6	0
PF3D7_0604900	chr6	212415	213032	-	215000	86170562	conserved+Plasmodium+protein%2C+unknown+function	10.9	23.9	112.7	87.6	65.4	27.5	24.4	109.1	47	508.5	0
PF3D7_0605000	chr6	213558	214142	+	215000	PFF0245w	mitochondrial+ribosomal+protein+L24+precursor%2C+putative	6.6	0	67.9	41.2	30.5	3.8	0	49.2	13.1	212.3	0
PF3D7_0605100	chr6	217240	219507	+	215000	86170571	RNA+binding+protein%2C+putative	100	79.9	157.8	57.1	129.4	71.9	67.6	113.8	89.1	866.6	0
PF3D7_0605200	chr6	220407	221813	-	225000	CAG25222.1	conserved+Plasmodium+protein%2C+unknown+function	6	16.4	94	178.1	178.4	98.7	34.5	277.6	186.3	1070	0
PF3D7_0605300	chr6	222739	224287	+	225000	PF3D7_0605300	serine%2Fthreonine+protein+kinase+%28ARK1%29	1.8	31.7	36.2	91	92.9	53.3	66	538.6	73.5	985	0
PF3D7_0605400	chr6	224613	225095	-	225000	CAG25224.1	calcium-binding+protein%2C+putative	0	0	9.2	16.8	16.7	3.3	2.2	69.7	0	117.9	0
PF3D7_0605500	chr6	225346	227446	-	225000	XP_966045.1	cyclin+dependent+kinase+binding+protein%2C+putative	12.3	14.6	59.1	70.4	112.4	79.7	19.4	102.5	41.8	512.2	0
PF3D7_0605600	chr6	228132	234835	-	235000	46362288	nucleoside+diphosphate+kinase%2C+putative	3.8	0	0.9	0	10.3	0	10.1	144.2	22.4	191.7	0
PF3D7_0605700	chr6	236397	237251	+	235000	2270.t00258	conserved+Plasmodium+protein%2C+unknown+function	0	0	0	0	0	0	0	49.7	1.1	50.8	0
PF3D7_0605800	chr6	237811	244521	-	245000	PFF0285c	DNA+repair-like+protein%2C+putative	8.5	5.3	59.2	70.1	53.3	10.5	55.4	51.5	21	334.8	0
PF3D7_0605900	chr6	247640	249166	+	245000	XP_966049.1	long+chain+polyunsaturated+fatty+acid+elongation+enzyme%2C+putative	680.9	250.6	189.1	240.9	445.9	1075.5	3964.1	1502	434.2	8783.2	0
PF3D7_0606000	chr6	250612	253803	-	255000	2270.t00255	conserved+Plasmodium+protein%2C+unknown+function	359.4	155.1	207.1	150.8	298.6	236.9	637.3	95.8	178	2319	0
PF3D7_0606100	chr6	257604	259974	+	255000	XP_966051.1	RNA+binding+protein%2C+putative	269.7	222.4	349.2	264	215.5	134	151.7	169.3	379.8	2155.6	0
PF3D7_0606200	chr6	261031	261945	-	265000	PF3D7_0606200	ubiquitin+conjugating+enzyme+E2%2C+putative	145.8	70.2	99	116.1	187.1	196.1	83.1	364.9	664.9	1927.2	0
PF3D7_0606500	chr6	265839	268399	-	265000	2270.t00251	polypyrimidine+tract+binding+protein%2C+putative	88.7	58.4	86.7	63.5	99.7	70	65.7	70.9	70.5	674.1	0
PF3D7_0606600	chr6	270332	277762	-	275000	PFF0325c	conserved+Plasmodium+protein%2C+unknown+function	119.6	38.8	105.1	53.7	61.4	20.6	40.8	42	161.3	643.3	0
PF3D7_0606700	chr6	282049	287017	+	285000	296004628	coatomer+alpha+subunit%2C+putative	68.6	30.9	95.2	48.6	78.1	20.9	28.1	62.8	12.3	445.5	0
PF3D7_0607000	chr6	293864	296797	+	295000	2270.t00246	translation+initiation+factor+IF-2%2C+putative	485.1	316.9	631	401.3	389	173.8	60.5	123.4	332.9	2913.9	0
PF3D7_0607300	chr6	304638	306042	+	305000	C6KSS1	uroporphyrinogen+III+decarboxylase+%28UROD%29	9.3	7.5	43.5	41.1	21.7	0	13.1	116.9	30.6	283.7	0
PF3D7_0607600	chr6	313856	316882	-	315000	XP_966066.2	conserved+Plasmodium+protein%2C+unknown+function	0	0	0.9	18.1	46.9	16	0	15.1	3.1	100.1	0
PF3D7_0607700	chr6	320740	328998	+	325000	PFF0380w	conserved+Plasmodium+protein%2C+unknown+function	0	0	0	60.7	189.5	101.8	0.1	1518.1	8.2	1878.4	0
PF3D7_0607800	chr6	329537	331725	-	335000	12368867	conserved+Plasmodium+protein%2C+unknown+function	0	0	25.3	8.5	9.3	7.5	4.1	58	7.3	120	0
PF3D7_0607900	chr6	332343	334934	+	335000	3885836	conserved+Plasmodium+protein%2C+unknown+function	5.3	7	58.6	46.4	25.2	17.9	3.6	42.5	13.6	220.1	0
PF3D7_0608000	chr6	335107	337368	-	335000	C6KSS8	conserved+protein%2C+unknown+function	84.5	124.2	259.5	227.5	151.2	52	12.1	132.9	191.8	1235.7	0
PF3D7_0608100	chr6	337792	341760	+	335000	12368867	conserved+Plasmodium+protein%2C+unknown+function	137.2	117.8	320.5	340.7	286.9	81.4	0	213.7	237.3	1735.5	0
PF3D7_0608200	chr6	341874	342821	-	345000	XP_966072.2	conserved+Plasmodium+protein%2C+unknown+function	0	3.4	10.6	15.6	15.3	0	0	42.1	0	87	0
PF3D7_0608300	chr6	343212	347507	+	345000	2270.t00230	conserved+Plasmodium+protein%2C+unknown+function	50.1	52.8	108.6	76.9	89.1	20	0	33.9	26.3	457.7	0
PF3D7_0608400	chr6	349946	350515	-	355000	C6KST2	conserved+Plasmodium+protein%2C+unknown+function	75.9	0	56.3	69.4	67.8	117.2	74.9	373.3	0	834.8	0
PF3D7_0608500	chr6	351780	352775	-	355000	PF3D7_0608500	proteasome+subunit+alpha+type+2%2C+putative	150.1	141.6	398.1	404.3	379.3	179.4	7.5	288.4	98.8	2047.5	0
PF3D7_0608600	chr6	355229	356276	+	355000	XP_966076.1	conserved+Plasmodium+protein%2C+unknown+function	0	0	4.6	8.1	6.9	0	0	269.1	1	289.7	1
PF3D7_0608700	chr6	358391	360203	+	355000	Pf_chaperones	chaperone%2C+putative	482.3	469.2	922.2	525.8	324.5	128.2	29.5	130.1	144.4	3156.2	0
PF3D7_0608800	chr6	362635	363879	+	365000	585604	ornithine+aminotransferase+%28OAT%29	2599.4	4937.1	7498.4	4459.5	4174.1	2616.2	197.2	1822.2	121	28425.1	0
PF3D7_0608900	chr6	365287	368459	+	365000	PF3D7_0608900	conserved+Plasmodium+protein%2C+unknown+function	0	2	23	46	67.1	17.1	2.1	27.4	9.2	193.9	0
PF3D7_0609000	chr6	370261	388494	+	375000	CAG25332.1	conserved+Plasmodium+protein%2C+unknown+function	205.6	179.4	247.6	219.4	208.7	83	5.4	88.8	40.2	1278.1	0
PF3D7_0609100	chr6	388915	390748	-	385000	MAL6P1.94	Zn2++or+Fe2++permease	466.3	288.9	364.4	289.1	345.2	346.9	132.2	2388	70.1	4691.1	1
PF3D7_0609200	chr6	392991	394611	+	395000	3885935	citrate+synthase-like+protein%2C+putative	55.6	47.4	77.5	45.6	67.9	8.2	4.4	37.3	0	343.9	0
PF3D7_0609300	chr6	396242	399289	+	395000	CAG25335.1	conserved+Plasmodium+protein%2C+unknown+function	0	0	13.6	0	11.2	0	0	17.3	0	42.1	0
PF3D7_0609500	chr6	402722	407242	+	405000	3885938	conserved+Plasmodium+protein%2C+unknown+function	6.6	9.9	3.9	7.6	4.2	0	19.4	6	0.8	58.4	0
PF3D7_0609700	chr6	413652	419781	+	415000	12368867	conserved+Plasmodium+protein%2C+unknown+function	235	164.6	95.2	49.1	142.9	200.2	164.9	177.8	304.8	1534.5	0
PF3D7_0609900	chr6	425805	431858	+	425000	PFF0490w	conserved+Plasmodium+protein%2C+unknown+function	14.6	0	0	8.7	6	0	0	2.6	0	31.9	0
PF3D7_0610100	chr6	434807	436465	-	435000	XP_966091.1	Pre-mRNA-splicing+factor+SLU7%2C+putative+%28SLU7%29	51.5	8.8	67.2	33.9	64.9	20.4	2	96.2	8.2	353.1	0
PF3D7_0610400	chr6	444747	445157	+	445000	XP_724814.1	histone+H3+%28H3%29	94.4	199.6	699.4	966.5	1721.9	866.5	75.4	731	1340.3	6695	0
PF3D7_0610500	chr6	445761	446363	-	445000	PFF0515c	conserved+protein%2C+unknown+function	5.6	0	1.8	1.5	21.1	0	0	27.8	7.6	65.4	0
PF3D7_0610600	chr6	449291	451198	+	455000	nuclearGenes	calcium-dependent+protein+kinase+%28CDPK2%29	14.7	63.9	155.9	130.5	196.3	90.3	25.8	96.5	32.5	806.4	0
PF3D7_0610700	chr6	452667	453446	+	455000	46361061	conserved+Plasmodium+protein%2C+unknown+function	414.4	115.2	171.6	135.1	57.5	27.9	185.2	101.1	807.7	2015.7	0
PF3D7_0610800	chr6	453671	455689	+	455000	C6KSV3	transketolase+%28TK%29	604	476.4	709.8	515.4	290.2	244.2	341.5	122.1	647.2	3950.8	0
PF3D7_0610900	chr6	456747	460589	-	455000	86170855	trancription+factor%2C+putative	98.7	57.8	111	87.5	107.6	43	97.8	54.7	61.5	719.6	0
PF3D7_0611000	chr6	463564	464676	-	465000	CAG25351.2	conserved+Plasmodium+membrane+protein%2C+unknown+function	31.5	123.5	136.3	227.3	268.8	290	110.9	1749.6	135.2	3073.1	1
PF3D7_0611400	chr6	471658	474150	-	475000	12368867	SWI%2FSNF-related+matrix-associated+actin-dependent+regulator+of++chromatin	24.4	6.2	0	2.4	8.6	9.7	0.3	15	7.8	74.4	0
PF3D7_0611800	chr6	490858	501140	-	495000	46361071	conserved+Plasmodium+protein%2C+unknown+function	0	0	1.6	0	0	0	0	0	1.1	2.7	0
PF3D7_0612200	chr6	512972	519548	-	515000	PF3D7_0612200	leucine-rich+repeat+protein+%28LRR6%29	8.2	0	42	88.7	152.2	116.8	3.4	597.3	22.8	1031.4	0
PF3D7_0612600	chr6	523657	525105	-	525000	PFF0610c	PP-loop+family+protein%2C+putative	27.3	11.6	46.6	66.4	69.7	47.2	0	96.1	31.1	396	0
PF3D7_0612700	chr6	525987	527030	-	525000	86170934	6-cysteine+protein+%28P12%29	45.6	25.7	58	149.3	486.1	510	0	313.5	224.1	1812.3	0
PF3D7_0612900	chr6	531126	533186	+	535000	Ribosomegenes	nucleolar+GTP-binding+protein+1%2C+putative	686.5	653.2	669.6	418.6	256.6	139.4	107.8	1137.8	812.2	4881.7	0
PF3D7_0613300	chr6	540077	544798	-	545000	PF3D7_0613300	integral+membrane+protein%2C+putative	0	0	0	0	21.7	21.9	0	0	0	43.6	0
PF3D7_0613400	chr6	546964	547741	+	545000	CAG25373.1	apicoplast+ribosomal+protein+L18+precursor%2C+putative	7.2	17.2	124.4	187.3	241.1	109.6	0	462.8	105	1254.6	0
PF3D7_0613500	chr6	548280	552371	-	555000	tubulin	adapter-related+protein%2C+putative	5.3	0	28.1	10	0	0	8.3	33.6	0	85.3	0
PF3D7_0613600	chr6	554457	558228	+	555000	XP_966123.1	conserved+Plasmodium+protein%2C+unknown+function	0	0	0.8	0	4.2	9.1	0	34.4	0	48.5	0
PF3D7_0613700	chr6	559349	561460	-	565000	PFF0665c	syntaxin+binding+protein%2C+putative	104.7	199.4	414.2	468.4	605.4	350.5	13.3	1133	240.4	3529.3	0
PF3D7_0613800	chr6	566139	578993	+	575000	3885716	transcription+factor+with+AP2+domain%28s%29+%28ApiAP2%29	3	0	51.9	266.3	534	280.9	0	30.5	70	1236.6	0
PF3D7_0613900	chr6	579435	585896	-	585000	molecularMotor	myosin+E%2C+putative+%28PfmyoE%29	0	0	4.6	10.4	68	182.3	0	3.9	15.9	285.1	0
PF3D7_0614000	chr6	587019	588635	-	585000	CAI79613.1	thiamin-phosphate+pyrophosphorylase%2C+putative	5.5	12.2	82.2	108.8	93	45.9	3.3	33.1	23	407	0
PF3D7_0614200	chr6	593172	595904	-	595000	2270.t00032	conserved+Plasmodium+protein%2C+unknown+function	20.6	10.7	39.7	94.5	131.2	123.9	4.4	199.4	61.1	685.5	0
PF3D7_0614300	chr6	597484	600517	-	595000	46361094	organic+anion+transporter	468.6	476.7	547.6	592.1	632	554.7	7.4	96.3	23.7	3399.1	0
PF3D7_0614400	chr6	604573	605340	+	605000	PFF0695w	conserved+Plasmodium+protein%2C+unknown+function	208.6	137.7	122.8	91.4	103	66.9	44.1	150.3	0	924.8	0
PF3D7_0614500	chr6	606142	607259	-	605000	MAL6P1.281	60S+ribosomal+protein+L19%2C+putative	740.9	512.6	849.7	671.8	446.1	171.4	40	303.6	236.3	3972.4	0
PF3D7_0614800	chr6	615297	616610	-	615000	MAL6P1.278	endonuclease+III+homologue%2C+putative	7.7	22.4	64.8	75.2	63.5	34.9	20.4	309.4	89.9	688.2	0
PF3D7_0614900	chr6	617762	621536	+	615000	3885809	conserved+Plasmodium+membrane+protein%2C+unknown+function	0	9.4	36.8	80.6	174	68.7	8.6	121.1	134.4	633.6	0
PF3D7_0615000	chr6	622272	622712	+	625000	12368867	conserved+Plasmodium+protein%2C+unknown+function	261.6	96.2	106.6	53.2	52.2	26.7	72.8	1052.1	331.3	2052.7	0
PF3D7_0615100	chr6	623023	624321	-	625000	XP_966137.1	enoyl-acyl+carrier+reductase+%28ENR%29	7.8	0	7.1	7.2	8.8	4.6	8	456.7	49.4	549.6	1
PF3D7_0615300	chr6	627693	630317	-	625000	C6KSZ4	conserved+Plasmodium+membrane+protein%2C+unknown+function	10.3	17.4	81.5	130.7	136.2	39.7	0.2	305.9	32.5	754.4	0
PF3D7_0615400	chr6	630956	640174	-	635000	MAL6P1.272	ribonuclease%2C+putative	126.8	47.1	108.6	106.8	121	46.4	0	41.9	40	638.6	0
PF3D7_0615500	chr6	644052	646169	+	645000	MAL6P1.271	cdc2-related+protein+kinase+5+%28CRK5%29	4.3	6	53.3	245.5	476.3	163	0	519.5	84.5	1552.4	0
PF3D7_0615600	chr6	646637	655596	-	655000	PFF0755c	conserved+Plasmodium+protein%2C+unknown+function	293.3	252.4	327.1	219	264.2	75	47	103	1171.3	2752.3	0
PF3D7_0615700	chr6	656376	657636	+	655000	2270.t00472	RNA+and+export+factor+binding+protein%2C+putative	209.6	176.8	281.8	246.7	264.7	112.5	7.5	327.3	134	1760.9	0
PF3D7_0615800	chr6	657939	661789	-	655000	46361109	conserved+Plasmodium+protein%2C+unknown+function	19.2	37.7	53.7	109.1	92.6	51.6	24.2	36.2	74	498.3	0
PF3D7_0615900	chr6	662435	667855	-	665000	12368867	conserved+Plasmodium+protein%2C+unknown+function	22.4	55.9	115.2	109.5	102.5	27.7	0.7	98.3	70.9	603.1	0
PF3D7_0616000	chr6	669860	671632	+	675000	MAL6P1.266	pyridoxine+kinase+%28PdxK%29	10.2	37.7	58.6	29.8	6.9	13.2	0.9	9.3	68.7	235.3	0
PF3D7_0616100	chr6	672119	672754	+	675000	12368867	conserved+Plasmodium+protein%2C+unknown+function	1615.2	1237.6	1456.1	1950.7	2191.8	2024.4	2219.4	1678.2	3285.1	17658.5	0
PF3D7_0616200	chr6	674118	676375	+	675000	12368867	Ndc80+homologue%2C+putative	5.6	57.6	114.9	172.1	185.6	114.8	5.6	207.4	59.1	922.7	0
PF3D7_0616400	chr6	678387	683429	+	685000	46361115	conserved+Plasmodium+protein%2C+unknown+function	9.1	41.2	70.8	48.4	47.8	27.7	1.7	0	0	246.7	0
PF3D7_0616600	chr6	689254	691131	-	695000	MAL6P1.260	conserved+Plasmodium+protein%2C+unknown+function	0	0	48.5	91.6	74.5	28.3	0	343.2	99.2	685.3	0
PF3D7_0616700	chr6	691769	693319	-	695000	46361118	ras+GTPAse%2C+putative	0	20	14.8	20.2	16.5	9	4	28	20.6	133.1	0
PF3D7_0616800	chr6	695929	697494	+	695000	86171141	malate%3Aquinone+oxidoreductase%2C+putative	162.6	398.6	608.7	759.1	542.3	256.7	29.7	742.8	374.4	3874.9	0
PF3D7_0616900	chr6	699252	703217	+	705000	C6KT10	conserved+Plasmodium+protein%2C+unknown+function	46.8	16.5	107.2	45.2	72.5	15.8	0	60.9	46.2	411.1	0
PF3D7_0617100	chr6	710059	714576	+	715000	PFF0830w	alpha+adaptin-like+protein%2C+putative	308.4	232.7	341.5	252.2	263.8	209.9	178.6	204.9	264.4	2256.4	0
PF3D7_0617200	chr6	717050	718917	+	715000	86171162	conserved+Plasmodium+protein%2C+unknown+function	356.4	255.6	469.6	306.7	300.7	150.1	26.8	324.8	31.1	2221.8	0
PF3D7_0617400	chr6	723117	731490	-	725000	C6KT15	erythrocyte+membrane+protein+1%2C+PfEMP1+%28VAR%29	13.2	7.7	7.4	15.6	22.3	1.6	13.4	46.5	21.9	149.6	0
PF3D7_0617700	chr6	741269	742406	-	745000	MAL6P1.250	rifin+%28RIF%29	4.6	4	8.8	2.2	3.2	8.1	16.3	15.5	24.6	87.3	0
PF3D7_0618000	chr6	758609	760996	+	755000	PF3D7_0618000	conserved+Plasmodium+membrane+protein%2C+unknown+function	0	0	0	2.4	111.5	177.7	0.3	0	1.2	293.1	0
PF3D7_0618100	chr6	761939	764170	+	765000	PF3D7_0618100	conserved+Plasmodium+protein%2C+unknown+function	5.5	3.3	34.8	16.6	50.4	18.7	0	55.3	13.4	198	0
PF3D7_0618500	chr6	774529	775470	+	775000	46361136	malate+dehydrogenase+%28MDH%29	13.4	14.4	50	112.2	127.8	105	28.8	930.3	65.7	1447.6	0
PF3D7_0618600	chr6	775980	777835	-	775000	296004686	rhomboid+protease+ROM10+%28ROM10%29	0	0.9	19.1	18	0	1.4	1.2	55.5	0.2	96.3	1
PF3D7_0619000.1	chr6	788707	796025	-	795000	12368867	conserved+Plasmodium+protein%2C+unknown+function	8.3	0	23.4	4.1	14.7	0	0.1	24.8	0	75.4	0
PF3D7_0619100	chr6	797211	798518	+	795000	3885939	conserved+Plasmodium+protein%2C+unknown+function	0	0	0	0	0	0	0	0	0	0	0
PF3D7_0619200	chr6	799397	802789	+	805000	MAL6P1.235	conserved+Plasmodium+protein%2C+unknown+function	128.3	49.6	102.6	68.6	108.2	12.2	11	53.5	72.1	606.1	0
PF3D7_0619300	chr6	803374	814552	-	805000	225631752	conserved+Plasmodium+protein%2C+unknown+function	0	0	0	3.8	3	0	1.4	29.3	12.3	49.8	0
PF3D7_0619400	chr6	815622	818247	-	815000	12368867	cell+division+cycle+protein+48+homologue%2C+putative	696.2	697.9	1846.4	1780.9	2326.6	1147.1	47	457	515.3	9514.4	0
PF3D7_0619500	chr6	820069	824247	-	825000	PF3D7_0619500	acyl-CoA+synthetase+%28ACS12%29	72.3	95	116.1	92.7	78.9	31.6	14	8.4	8.4	517.4	0
PF3D7_0619900	chr6	840523	841224	+	845000	SF3A2	splicing+factor+3A+subunit+2%2C+putative+%28SF3A2%29	19.1	22.9	30.5	24	30.5	21	16.1	33.6	15.1	212.8	0
PF3D7_0620000	chr6	841846	843363	-	845000	GPI_prots	conserved+Plasmodium+protein%2C+unknown+function	0	0	0	0	0	0	0	33.9	0	33.9	1
PF3D7_0620400	chr6	851378	852955	-	855000	XP_966190.1	merozoite+surface+protein+10+%28MSP10%29	6.2	0	1.9	13.3	140.6	89.9	21.5	1.4	25.9	300.7	0
PF3D7_0620700	chr6	859026	860114	-	855000	PFF1010c	DnaJ+protein%2C+putative	29.6	28.3	48.9	110.4	270.7	252.7	9.3	2861.2	69.7	3680.8	0
PF3D7_0621000	chr6	862882	865416	+	865000	86171353	conserved+Plasmodium+protein%2C+unknown+function	0	0	0.7	16.1	6	8.8	0	0	0	31.6	0
PF3D7_0621100	chr6	865845	869909	-	865000	225631757	conserved+Plasmodium+protein%2C+unknown+function	0	0.1	0	16.4	65.1	52	0	74.4	28.4	236.4	0
PF3D7_0621200	chr6	871297	872202	-	875000	PFF1025c	pyridoxine+biosynthesis+protein+PDX1+%28Pdx1%29	1291.6	1103.6	1673.6	698.9	277.7	131.4	124.9	923.5	51.5	6276.7	0
PF3D7_0621300	chr6	873809	876190	+	875000	3885889	mRNA+binding+Pumilio-homology+domain+protein%2C+putative	275.2	161.3	231	95.3	31	19	37.1	76.5	0	926.4	0
PF3D7_0621400	chr6	878790	880784	+	875000	PF3D7_0621400	Pf77+protein+%28ALV7%29	1.7	3.2	3.7	11.2	13.4	22.5	15.6	2714.8	32.2	2818.3	1
PF3D7_0621500	chr6	881963	882994	+	885000	CAG25029.1	conserved+Plasmodium+protein%2C+unknown+function	27.4	30.1	107.1	50.8	69.5	47.3	0	49.7	8.4	390.3	0
PF3D7_0621700	chr6	884428	889614	+	885000	3885893	conserved+Plasmodium+protein%2C+unknown+function	0	0	0	0	0	0	0	0	0	0	0
PF3D7_0621900	chr6	893450	895780	-	895000	86171395	conserved+Plasmodium+protein%2C+unknown+function	47.6	22.6	57.3	36.9	44.3	10.6	19.2	13.2	12.3	264	0
PF3D7_0622100	chr6	898341	902363	-	905000	PFF1065c	conserved+Plasmodium+protein%2C+unknown+function	0	0	0	2.6	0.2	0	0	57.9	0	60.7	1
PF3D7_0622200	chr6	903740	906322	-	905000	46361171	radical+SAM+protein%2C+putative	108.2	80.4	93.9	48.3	33	7.8	8.5	49.3	4.2	433.6	0
PF3D7_0622300	chr6	908017	911096	+	905000	12368867	conserved+Plasmodium+protein%2C+unknown+function	7.4	27.4	12.7	24.9	8.5	11.5	30.4	9	29.3	161.1	0
PF3D7_0622500	chr6	912406	913710	-	915000	86171421	RNA+methyltransferase%2C+putative	1.4	0	8.5	6.2	6.5	0	4.2	26.3	0	53.1	0
PF3D7_0622800	chr6	919685	924028	+	925000	XP_966210.1	leucyl+tRNA+synthase	116	45.2	123.6	60	86.8	8.6	0.8	34.7	105.1	580.8	0
PF3D7_0622900	chr6	925105	931074	-	925000	225631760	transcription+factor+with+AP2+domain%28s%29%2C+putative+%28ApiAP2%29	37.2	6.4	11.6	0.2	10	8.3	34	4.7	0	112.4	0
PF3D7_0623100	chr6	939660	943720	-	945000	CAG25043.1	coronin+binding+protein%2C+putative	474.1	417	521.9	356.6	280.3	155.2	329.4	298.1	241.8	3074.4	0
PF3D7_0623200	chr6	946129	947244	+	945000	PF3D7_0623200	ferredoxin+NADP+reductase+%28FNR%29	111	68.4	133.3	125.1	64.5	38.1	65.4	690.3	30.1	1326.2	0
PF3D7_0623300	chr6	947493	948644	-	945000	PF3D7_0623300	EGF-like+membrane+protein%2C+putative	5.7	0	121.9	199.9	206.5	97.6	21.9	91.8	30.5	775.8	0
PF3D7_0623400	chr6	950223	951506	-	955000	2270.t00121	RNA-binding+protein+mei2+homologue%2C+putative	9.8	9.3	14.7	31.1	19.8	11.4	15.2	209.5	38.8	359.6	1
PF3D7_0623500	chr6	952906	954848	-	955000	comp_redox	superoxide+dismutase+%28SOD2%29	28.7	19.1	18.5	7.5	11.4	15.7	28.7	23.9	25.1	178.6	0
PF3D7_0623600	chr6	956765	958756	+	955000	CAG25048.1	transcription+or+splicing+factor-like+protein%2C+putative	373.2	308.4	465.7	346.8	276.6	165.8	140.1	173.9	242.8	2493.3	0
PF3D7_0623700	chr6	959132	962545	-	965000	12368867	ATP+dependent+DEAD-box+helicase%2C+putative	0	8.7	38.4	38	33.4	1	18.5	57.5	7.1	202.6	0
PF3D7_0623800	chr6	963741	970955	-	965000	PF3D7_0623800	protein+kinase%2C+putative+%28TKL4%29	714	216.4	150.3	65	79.1	211.7	1432.8	55	156.8	3081.1	0
PF3D7_0623900	chr6	977183	978049	+	975000	86171485	ribonuclease+HII%2C+putative	4.3	8.6	36.6	47.4	31.2	3.6	47	71.7	7.3	257.7	0
PF3D7_0624000	chr6	981066	982547	+	985000	12368867	hexokinase+%28HK%29	1115	1145.7	1770.6	1362.7	986.4	694.8	490.1	430.7	276.1	8272.1	0
PF3D7_0624100	chr6	983946	984989	+	985000	CAG25053.2	conserved+Plasmodium+protein%2C+unknown+function	8.9	10.4	34.4	76.7	71.1	31.8	17.5	228.1	44.8	523.7	0
PF3D7_0624200	chr6	985047	986870	-	985000	PFF1165c	conserved+Plasmodium+protein%2C+unknown+function	0	0	17.7	9.9	24.9	0	0	86.2	0	138.7	0
PF3D7_0624400	chr6	990375	992198	-	995000	12368867	conserved+Plasmodium+protein%2C+unknown+function	41.5	44.1	124.4	80.7	91.8	15.5	0	38.6	37.6	474.2	0
PF3D7_0624500	chr6	994284	994553	+	995000	complex_ubiquitin_ligase	anaphase+promoting+complex+subunit%2C+putative	20.4	31.4	156.5	408.4	605.1	335.1	19.7	1443.8	441.6	3462	0
PF3D7_0624600	chr6	999524	1007683	+	1005000	2270.t00132	SNF2+helicase%2C+putative+%28ISWI%29	131.1	110.1	155.9	140.9	221.2	116.3	107.9	74.1	195.1	1252.6	0
PF3D7_0624700	chr6	1009457	1010718	-	1015000	3885976	N-acetylglucosaminylphosphatidylinositol+deacetylase%2C+putative	37.1	49	130.2	169.6	242.9	131.6	104.4	235.4	167.5	1267.7	0
PF3D7_0624800	chr6	1011429	1014569	-	1015000	3885977	conserved+Plasmodium+protein%2C+unknown+function	0	0	0	0	0	0	0	0	0	0	0
PF3D7_0625000.1	chr6	1020024	1021875	+	1025000	2270.t00137	phosphatidic+acid+phosphatase+%28PAP%29	12.7	2.1	12.7	40.6	83.8	70	9.9	89.8	91.9	413.5	0
PF3D7_0625100	chr6	1023015	1024214	+	1025000	3885685	sphingomyelin+synthase%2C+putative	0	0	0	0	18.5	0	3.1	1383.2	130.5	1535.3	0
PF3D7_0625300	chr6	1026823	1031157	-	1025000	nuclearGenes	DNA+polymerase+1%2C+putative	0	7	71.9	121.9	98.7	50.5	1.2	42.1	2.2	395.5	0
PF3D7_0625600	chr6	1039655	1041550	+	1045000	12368867	poly%28A%29+polymerase+PAP%2C+putative	287	96.5	98.1	57.4	56.6	38.6	306.3	35.7	22	998.2	0
PF3D7_0625700	chr6	1042652	1042948	-	1045000	12368867	conserved+Plasmodium+protein%2C+unknown+function	0	0	0	0	0	0	0	0	0	0	0
PF3D7_0625800	chr6	1043546	1045474	+	1045000	3885692	conserved+Plasmodium+protein%2C+unknown+function	26.1	37.9	58.4	46	40.5	42.5	54.2	52.5	117.5	475.6	0
PF3D7_0625900	chr6	1046986	1048052	+	1045000	2270.t00146	conserved+Plasmodium+protein%2C+unknown+function	0	0	0	0	0	0	0	1	2.8	3.8	0
PF3D7_0626000	chr6	1048710	1053965	-	1055000	PFF1260c	conserved+Plasmodium+protein%2C+unknown+function	58.6	51.5	41.3	33.6	23.4	18.6	6.2	58.5	9.6	301.3	0
PF3D7_0626100	chr6	1056052	1058529	+	1055000	C6KT97	oxidoreductase%2C+short-chain+dehydrogenase+family%2C+putative	1.3	18.7	60.3	158.5	115.8	76.6	4.7	86.2	99	621.1	0
PF3D7_0626200	chr6	1058666	1059922	-	1055000	PF3D7_0626200	conserved+Plasmodium+protein%2C+unknown+function	0	0	0	7.9	0	0	0	0	0	7.9	0
PF3D7_0626300	chr6	1061115	1062891	-	1065000	C6KT99	3-oxoacyl-acyl-carrier+protein+synthase+I%2FII+%28FabB%2FFabF%29	6.3	4.9	17	23.8	24.3	14.2	4.8	35.5	41.6	172.4	0
PF3D7_0626400	chr6	1065147	1068626	+	1065000	3885997	Sec14+domain+containing+protein	0	0	13	0	19.6	4	1.2	57.8	40.8	136.4	0
PF3D7_0626800	chr6	1078995	1081320	+	1085000	PyrK	pyruvate+kinase+%28PyrK%29	281.8	99.8	191.1	259.3	262.6	128.2	42.2	23.1	0	1288.1	0
PF3D7_0627100	chr6	1089190	1094328	+	1095000	86171655	ankyrin-repeat+protein%2C+putative	2628.9	1709	2612.9	2910.7	2990.4	3251.7	3475.4	1876.4	3790.6	25246	0
PF3D7_0627700	chr6	1108197	1111640	+	1105000	12368867	transportin	466.2	246.4	551.5	466.8	533.2	332.6	518.5	257	486.3	3858.5	0
PF3D7_0627800	chr6	1114544	1117537	-	1115000	PF3D7_0627800	acetyl-CoA+synthetase%2C+putative	158.3	130.1	254.3	240.6	216.7	202.8	122.1	28.5	34.4	1387.8	0
PF3D7_0627900	chr6	1119587	1120858	+	1125000	riboMaturation	conserved+Plasmodium+protein%2C+unknown+function	57.5	29.8	51.7	56.9	57.8	44.2	117.5	38.6	34.8	488.8	0
PF3D7_0628000	chr6	1121690	1122211	+	1125000	PTPS	6-pyruvoyltetrahydropterin+synthase+%28PTPS%29	0	20.2	4.6	19.4	0.5	0	10.1	6	0	60.8	0
PF3D7_0628100	chr6	1122801	1153664	-	1135000	3885722	HECT-domain+%28ubiquitin-transferase%29%2C+putative	3	0	5.6	32.9	321.3	207.3	3	149.9	60.5	783.5	0
PF3D7_0628200	chr6	1159862	1169080	+	1165000	XP_966265.1	protein+kinase+PK4+%28PK4%29	170.3	75.8	161.8	87.5	151.2	42.7	32.1	85.6	34.3	841.3	0
PF3D7_0628400	chr6	1176265	1178587	+	1175000	PFF1377w	conserved+Plasmodium+membrane+protein%2C+unknown+function	1585.5	1243.1	1447.1	1930.2	2177	2015.6	2223.2	1655.7	3280.4	17557.8	0
PF3D7_0628500	chr6	1179053	1180003	-	1175000	XP_966267.1	conserved+Plasmodium+protein%2C+unknown+function	0	0	4.2	0	0	0	0	18.3	0	22.5	0
PF3D7_0628600	chr6	1180573	1182353	-	1185000	chrom_remod	conserved+Plasmodium+protein%2C+unknown+function	0	0	0.8	0	5.6	0	0	0	0	6.4	0
PF3D7_0628900	chr6	1189472	1193978	+	1195000	PF3D7_0628900	RAP+protein%2C+putative	1.8	43.2	247.7	187.8	100.8	27.8	5.1	259	66.8	940	0
PF3D7_0629000	chr6	1194304	1195179	-	1195000	2270.t00178	conserved+protein%2C+unknown+function	1601.8	1242.8	1483.6	1946.4	2186	2021.9	2225.5	1666.8	3283.7	17658.5	0
PF3D7_0629100	chr6	1196041	1198038	-	1195000	PF3D7_0629100	nicotinate+phosphoribosyltransferase%2C+putative	107.2	67.8	200.8	176.5	158.8	76.2	63.6	265.2	186.1	1302.2	0
PF3D7_0629200	chr6	1199853	1200995	-	1205000	eukaryotes	DnaJ+protein%2C+putative	11.4	0	22.6	23.2	13.8	0	0	0	0	71	0
PF3D7_0629400	chr6	1210420	1212762	+	1215000	PFF1425w	RNA+binding+protein%2C+putative	0	12.1	72.3	27.2	38	1.6	0	94.4	0	245.6	0
PF3D7_0629500	chr6	1213948	1216005	-	1215000	MAL6P1.133	amino+acid+transporter%2C+putative	493.5	425.3	876.1	438.6	363	428.8	337.1	176.4	131.2	3670	0
PF3D7_0629700	chr6	1221941	1242922	+	1235000	chrom_mod_prot	SET+domain+protein%2C+putative+%28SET1%29	130	61.7	178.7	173.6	214.2	81.3	15.7	72	206.4	1133.6	0
PF3D7_0629800	chr6	1243580	1247219	-	1245000	2270.t00185	cullin-like+protein%2C+putative	24.7	0	38.5	17.9	8.2	16.2	7.1	24.5	80.5	217.6	0
PF3D7_0630300	chr6	1260398	1269596	-	1265000	C6KTD8	DNA+polymerase+epsilon%2C+catalytic+subunit+a%2C+putative	0	16.5	21.2	22.3	31.3	7.4	12.2	65.6	0	176.5	0
PF3D7_0630400	chr6	1272363	1273532	-	1275000	2270.t00193	conserved+Plasmodium+protein%2C+unknown+function	0	0	0	2.2	37.7	16.1	0	48	34.1	138.1	0
PF3D7_0630500	chr6	1276329	1277825	+	1275000	12368867	microtubule-associated+protein+ytm1+homologue%2C+putative	24.2	30.8	61.1	16.9	5.8	6.6	5.5	21.1	23.6	195.6	0
PF3D7_0630600	chr6	1279820	1283246	+	1285000	3885771	conserved+Plasmodium+protein%2C+unknown+function	0	0	1.4	2.3	10.5	0.3	1.5	5.8	12.6	34.4	0
PF3D7_0630700	chr6	1285058	1287031	+	1285000	3885772	conserved+Plasmodium+protein%2C+unknown+function	11.2	10.9	19.8	10.3	14.3	6	13.2	39.8	13.8	139.3	0
PF3D7_0630800	chr6	1288237	1290805	+	1285000	12368867	conserved+Plasmodium+protein%2C+unknown+function	1.3	0	4.9	0	0	0	0	160.5	0	166.7	1
PF3D7_0630900	chr6	1291035	1292972	-	1295000	riboMaturation	DEAD%2FDEAH+box+ATP-dependent+RNA+helicase+%28Has1p%29	152.4	255.1	308.2	169.2	80.9	66.4	69.8	89.2	61.1	1252.3	0
PF3D7_0631200	chr6	1313708	1315253	-	1315000	MAL6P1.18	erythrocyte+membrane+protein+1+%28PfEMP1%29%2C+pseudogene+%28VAR+pseudogene%29	197	136	316	306.6	148.4	445.1	491.2	117.1	351.6	2509	0
PF3D7_0631400	chr6	1318327	1319116	-	1315000	C6KTE8	Pfmc-2TM+Maurer%27s+cleft+two+transmembrane+protein+%28MC-2TM%29	1608.9	1262.9	1496.9	1958	2199.2	2083.6	2236.2	1661.9	3313.1	17820.7	0
PF3D7_0631500	chr6	1321320	1322094	-	1325000	86171870	Plasmodium+exported+protein+%28hyp4%29%2C+unknown+function	1590.4	1222	1455.6	1936.6	2177.8	2004.5	2224.2	1661.5	3277.8	17550.4	0
PF3D7_0631800	chr6	1329771	1330963	+	1335000	RIF	rifin+%28RIF%29	13	16.8	25.4	20.5	15.3	16	34.9	26.5	130.7	299.1	0
PF3D7_0631900	chr6	1333013	1334035	+	1335000	3885823	stevor+%28stevor%29	29.6	85.8	70	53.5	53.2	40	66.2	32.7	86.6	517.6	0
PF3D7_0632000	chr6	1336146	1337473	+	1335000	46361269	rifin+%28RIF%29	6.5	0.7	7	9.6	14.6	5.9	10.5	15.7	30.7	101.2	0
PF3D7_0632100	chr6	1338218	1339417	-	1335000	2270.t00316	rifin+%28RIF%29	0	0	0	15.7	20.4	0	10.7	0	4.8	51.6	0
PF3D7_0632200	chr6	1341307	1342595	-	1345000	XP_966302.1	rifin+%28RIF%29	0	4.6	0	0.6	6.7	0	15.3	5	18.1	50.3	0
PF3D7_0632300	chr6	1347341	1348571	+	1345000	2270.t00318	rifin+%28RIF%29	0	0	0	0	0	0	0	4.1	7.7	11.8	0
PF3D7_0632400	chr6	1350724	1352087	+	1355000	PF3D7_0632400	rifin+%28RIF%29	19.4	12.8	18.3	0.6	13.6	19.1	22.6	3.4	96.6	206.4	0
PF3D7_0632500	chr6	1353946	1366430	-	1365000	PF3D7_0632500	erythrocyte+membrane+protein+1%2C+PfEMP1+%28VAR%29	115.4	73.9	45.3	35.7	45.7	39.4	41.9	30.9	77.2	505.4	0
PF3D7_0632600	chr6	1367912	1369107	+	1365000	MAL6P1.3	rifin%2C+pseudogene+%28RIF+pseudogene%29	15.3	0	10.4	0	0	0	7.3	0	2.4	35.4	0
PF3D7_0632700	chr6	1371501	1372861	+	1375000	86171923	rifin+%28RIF%29	15.1	15.1	16.9	22.8	11.7	21.6	19.3	16.7	127.5	266.7	1
PF3D7_0632800	chr6	1374797	1382627	-	1375000	PFF1595c	erythrocyte+membrane+protein+1%2C+PfEMP1+%28VAR%29	161.4	71.2	27.7	22.4	25.3	29.3	24.9	27.4	64.2	453.8	0
PF3D7_0701800	chr7	75918	77055	-	75000	PF07_0003	rifin+%28RIF%29	0	0	0	0	0	0	12.3	60.1	16	88.4	1
PF3D7_0701900	chr7	79890	82943	-	85000	XP_001348954.1	Plasmodium+exported+protein%2C+unknown+function	112.4	25.1	17.1	0.9	9.9	72.6	327.4	3.8	16.8	586	0
PF3D7_0702000	chr7	84797	85674	+	85000	MAL7P1.6	Plasmodium+exported+protein+%28hyp12%29%2C+unknown+function	572.3	150.3	66.4	10.1	54.5	306.4	881.3	2.2	4.5	2048	0
PF3D7_0702100	chr7	88685	90886	+	85000	2655018	Plasmodium+exported+protein+%28PHISTb%29%2C+unknown+function%2C+pseudogene	36	26.8	4.7	12.7	31.3	25.8	88.8	12.2	27.8	266.1	0
PF3D7_0702200	chr7	91867	93141	-	95000	PF07_0005	lysophospholipase%2C+putative	144.2	56.9	30.6	6.5	31.9	155.6	95	23.8	1.2	545.7	0
PF3D7_0702300	chr7	96761	98730	+	95000	2654973	sporozoite+threonine+and+asparagine-rich+protein+%28STARP%29	65.8	1.5	0	0	0	0	0.2	0	0	67.5	0
PF3D7_0702400	chr7	101694	102285	+	105000	23498727	conserved+Plasmodium+protein%2C+unknown+function	6662.3	3403.3	3585.5	2038.9	907.8	1109.2	4200.8	254.7	239.1	22401.6	0
PF3D7_0702500	chr7	104957	105989	-	105000	PF07_0008	Plasmodium+exported+protein%2C+unknown+function	523.1	243.7	231.7	98.5	59	25.7	29.2	11.4	30.8	1253.1	0
PF3D7_0702600	chr7	109915	110178	+	115000	23498729	chitinase+precursor+fragment%2C+truncated	94.7	121	43.3	56.9	59	191.3	676.1	79.2	115.9	1437.4	0
PF3D7_0702900	chr7	113144	113948	-	115000	mitoticCentro	centrin%2C+putative	56.1	7.1	27	18.1	30.1	11.6	25.9	302.1	6	484	0
PF3D7_0703000	chr7	115239	120770	+	115000	PF07_0010	conserved+Plasmodium+protein%2C+unknown+function	0	5.5	0	7	4.9	0	0	0	0	17.4	0
PF3D7_0703100	chr7	121414	121956	+	125000	Q8IC39	conserved+Plasmodium+protein%2C+unknown+function	18.2	0.1	42.7	22.1	0	0	13.9	59.2	0	156.2	0
PF3D7_0703200	chr7	122513	127135	-	125000	Q8IC38	conserved+Plasmodium+protein%2C+unknown+function	0	0	6.3	5.2	39.1	0	0	30.5	0	81.1	0
PF3D7_0703400	chr7	129370	131832	-	135000	23498735	conserved+Plasmodium+protein%2C+unknown+function	2.2	7.9	26.4	83	32.8	3.5	5.7	20.1	5	186.6	0
PF3D7_0703500	chr7	135606	142505	+	135000	MAL7P1.12	erythrocyte+membrane-associated+antigen	625.1	702.2	790	559.2	567.6	261.5	148.2	416.4	330.4	4400.6	0
PF3D7_0703600	chr7	144019	145953	+	145000	PF3D7_0703600	conserved+Plasmodium+protein%2C+unknown+function	23.7	66.7	99.6	169.4	310.9	365.9	104.7	240	60.7	1441.6	0
PF3D7_0703700	chr7	146645	147394	-	145000	MAL7P1.14	conserved+Plasmodium+protein%2C+unknown+function	465.6	459.8	654.5	437.6	266.6	209.2	760.5	144.8	57.4	3456	0
PF3D7_0703800	chr7	149804	152980	+	155000	PF07_0014	conserved+Plasmodium+protein%2C+unknown+function	0	0	0	0	0	0	0	16.7	3.4	20.1	0
PF3D7_0703900	chr7	153320	166396	-	155000	PF3D7_0703900	conserved+Plasmodium+membrane+protein%2C+unknown+function	96.4	40.9	103.6	38.7	34.2	0	3.5	22.9	0.9	341.1	0
PF3D7_0704000	chr7	167489	177295	-	175000	MAL7P1.16	conserved+Plasmodium+membrane+protein%2C+unknown+function	11.8	0	15.8	3	0	0	0	0.1	0	30.7	0
PF3D7_0704100	chr7	180036	190715	+	185000	225632135	conserved+Plasmodium+membrane+protein%2C+unknown+function	0	0	0	43.6	91.7	65.5	0	515	77.8	793.6	0
PF3D7_0704200	chr7	191309	194890	-	195000	PF07_0015	tRNA+m5C-methyltransferase%2C+putative	12	0	0	0	0	0	7.6	0	3.6	23.2	0
PF3D7_0704300	chr7	197691	203249	+	205000	PF07_0016	conserved+Plasmodium+membrane+protein%2C+unknown+function	23.7	12.1	121.3	280.7	608.5	280.3	15.8	121.6	71.3	1535.3	0
PF3D7_0704400	chr7	204718	207750	+	205000	124511688	phosphoinositide-binding+protein%2C+putative	28	21.5	81	76.8	139.9	41.6	11.3	232.3	0	632.4	0
PF3D7_0704500	chr7	208690	213501	-	215000	MAL7P1.18	serine%2Fthreonine+protein+kinase%2C+putative	17.8	4.3	11	47.3	146.9	55.1	29.9	96.3	2	410.6	0
PF3D7_0704600	chr7	216024	229072	-	225000	XP_002808753.1	ubiquitin+transferase%2C+putative	100.4	65	127.5	85.7	114.8	63.5	20.2	104.4	99.5	781	0
PF3D7_0704700	chr7	233401	237414	+	235000	23498748	conserved+Plasmodium+membrane+protein%2C+unknown+function	15.5	10.2	22.9	25.6	33.6	15.8	0	11.1	0	134.7	0
PF3D7_0704800	chr7	238159	242052	-	245000	XP_001348981.1	conserved+Plasmodium+protein%2C+unknown+function	3.3	0.5	38.6	67.4	110.8	131.3	0	52.1	53.9	457.9	0
PF3D7_0704900	chr7	243898	245016	-	245000	nuclearGenes	peptide+chain+release+factor%2C+putative	0	0	0	0	0	0	0	15.9	11.4	27.3	0
PF3D7_0705000	chr7	246259	250152	-	245000	XP_001348983.1	methyltransferase%2C+putative	231.8	136.7	258	222.7	232.1	101	5.1	94.4	15.7	1297.5	0
PF3D7_0705100	chr7	252282	255251	+	255000	23498752	conserved+Plasmodium+protein%2C+unknown+function	0	4.8	0	20.7	94.8	27.3	10.7	41	2.5	201.8	0
PF3D7_0705200	chr7	256086	260684	+	255000	Q8IC18	conserved+Plasmodium+protein%2C+unknown+function	0	15.5	51.1	33.6	30.1	12.5	17	23.1	22.4	205.3	0
PF3D7_0705300	chr7	261977	264454	+	265000	CAD50824.1	origin+recognition+complex+subunit+2%2C+putative+%28ORC2%29	0	0	0	8.6	15.2	0	0	1.6	0	25.4	0
PF3D7_0705400	chr7	264973	267438	-	265000	PF07_0023	minchromosome+maintenance+%28MCM%29+complex+subunit%2C+putative+%28MCM7%29	10.5	25.6	127.4	165.6	250.9	154	30.8	249.7	155.8	1170.3	0
PF3D7_0705500	chr7	270022	278706	-	275000	23498756	inositol-phosphate+phosphatase%2C+putative	17.8	17.7	12.6	20.6	29	11.2	58.9	12.2	27.4	207.4	0
PF3D7_0706700	chr7	322907	325528	+	325000	Q8IAJ9	DNA+mismatch+repair+protein%2C+putative+%28MSH2-2%29	8.4	7.6	6.5	5.5	14.2	0	18.9	62	26.1	149.2	0
PF3D7_0707500	chr7	348277	353082	+	355000	2655194	conserved+Plasmodium+protein%2C+unknown+function	15.3	0	0	0	0	0	9	0	0	24.3	0
PF3D7_0707600	chr7	353986	354720	+	355000	PF07_0025	conserved+Plasmodium+protein%2C+unknown+function	62.3	18.3	53.6	21.7	44.9	11.5	54.1	150.9	0	417.3	0
PF3D7_0707700	chr7	357700	360585	+	355000	PF07_0026	ubiquitin-protein+ligase+e3%2C+putative	56.3	29.8	82.3	58.6	86.8	78	3.4	53.3	105.8	554.3	0
PF3D7_0707800	chr7	362005	365779	+	365000	23498760	RAP+protein%2C+putative	0	4.3	3.9	15.7	8.1	0	7.5	19.5	8.8	67.8	0
PF3D7_0707900	chr7	366929	367708	+	365000	CAD50831.1	large+ribosomal+subunit+processing+protein%2C+putative	96.2	75.9	140.5	94.5	66.8	22.5	152.7	168.2	40	857.3	0
PF3D7_0708000	chr7	368707	371672	+	375000	CAX64042.1	cytoskeleton+associated+protein%2C+putative	7.9	38.3	87.5	52.7	48.9	16.7	2.8	276.2	1.6	532.6	0
PF3D7_0708100	chr7	372897	373106	-	375000	PF07_0027	DNA-directed+RNA+polymerase+2+8.2+kDa+polypeptide%2C+putative	398.9	280.2	448.8	296.7	219.2	122.9	445.3	567.8	232.8	3012.6	0
PF3D7_0708200	chr7	374243	377393	-	375000	2655064	conserved+Plasmodium+protein%2C+unknown+function	6	18.8	12.7	14.1	12.9	7.5	34.4	27.1	64	197.5	0
PF3D7_0708300	chr7	378031	379305	+	375000	12368867	O-sialoglycoprotein+endopeptidase%2C+putative	71.4	77.4	90.5	57	58.4	52.4	37.2	38.1	49.1	531.5	0
PF3D7_0708400	chr7	381592	384614	+	385000	Pf_chaperones	heat+shock+protein+90+%28HSP90%29	1534	1135.5	2844.8	1604.6	1583.4	897.2	1682.9	645.4	2046.2	13974	0
PF3D7_0708500	chr7	385583	388321	-	385000	PF07_0030	heat+shock+protein+86+family+protein	377	296.2	332.6	181.9	166.5	105.7	67.2	609.2	300.4	2436.7	0
PF3D7_0708600	chr7	389473	390365	-	385000	124511734	heat+shock+protein+86+family+protein	0	0	0	0	3.5	1.6	0	704.5	0.2	709.8	1
PF3D7_0708700	chr7	391502	392188	-	395000	PF07_0032	Cg8+protein	59	90.7	332.1	415.2	541.8	466	116.9	703	81.2	2805.9	0
PF3D7_0708800	chr7	395711	398332	+	395000	chapfold	heat+shock+protein+70+%28HSP70-z%29	547.3	376.2	764.5	390.2	314.3	166.5	133.9	321	78.2	3092.1	0
PF3D7_0708900	chr7	399290	400243	-	395000	BiogenesisCytochromeOxidase	Cg3+protein	57.1	5.3	33.2	59.1	114.4	43.6	49.5	136.3	47.6	546.1	0
PF3D7_0709000	chr7	403222	406317	+	405000	AAF60275.1	chloroquine+resistance+transporter+%28CRT%29	276.8	167.2	270.7	125.2	118.1	98.9	382.1	45.7	61.2	1545.9	0
PF3D7_0709100	chr7	408215	411961	+	415000	2655071	Cg1+protein	51.1	110.7	561	780.8	730.5	402.7	59.1	540.9	124.4	3361.2	0
PF3D7_0709200	chr7	412343	413161	-	415000	Q8IBZ7	Cg6+protein%2Cglutaredoxin-like+protein+%28GLP3%29	0	0	12.1	8.7	18.2	0	0	1.5	0.1	40.6	0
PF3D7_0709300	chr7	413560	421749	-	415000	2655073	Cg2+protein	127	95.1	157.3	131.6	101	62	40.8	124.4	127	966.2	0
PF3D7_0709400	chr7	423236	427234	-	425000	124511750	Cg7+protein	0	0	0.4	0	18.3	0	0	11.2	0.8	30.7	0
PF3D7_0709500	chr7	428723	429346	+	425000	23498777	conserved+Plasmodium+protein%2C+unknown+function	2	0	0	7.6	0.3	0	0	12.1	0.3	22.3	0
PF3D7_0709600	chr7	429857	433758	-	435000	CAX64043.1	rRNA%2FtRNA+ribonuclease+MRP%2FP+subunit%2C+putative	86.5	62.3	93.1	52.3	49	14.6	18.1	10	21.1	407	0
PF3D7_0709700	chr7	435089	436195	-	435000	PF07_0040	lysophospholipase%2C+putative	65.9	22.5	99.8	117.5	170.1	132.5	26.6	698.7	100.2	1433.8	0
PF3D7_0709900	chr7	438557	445881	-	445000	2655201	conserved+Plasmodium+membrane+protein%2C+unknown+function	2.3	5.4	7.5	9.7	29.4	14.1	21.7	380.3	176.1	646.5	1
PF3D7_0710000	chr7	447515	458496	-	455000	2655203	conserved+Plasmodium+protein%2C+unknown+function	29.6	8.1	15.3	47.1	59.6	22.6	2	20.6	30.8	235.7	0
PF3D7_0710100	chr7	460057	461436	+	465000	PF3D7_0710100	conserved+Plasmodium+protein%2C+unknown+function	12.6	0	2.4	0	1	0	0	36.9	7.5	60.4	0
PF3D7_0710200	chr7	463105	471837	+	465000	23498783	conserved+Plasmodium+protein%2C+unknown+function	0	0	1.8	0	17.5	0	0	35.9	0	55.2	1
PF3D7_0710300	chr7	472501	473541	-	475000	262092697	conserved+Plasmodium+membrane+protein%2C+unknown+function	89.1	118.6	277.9	167	152.2	48.4	33.5	104.5	37.5	1028.7	0
PF3D7_0710400	chr7	474623	475720	+	475000	MAL7P1.32	nucleotide+excision+repair+protein%2C+putative	13.1	0	0	0	0.5	0	0	2.5	0	16.1	0
PF3D7_0710500	chr7	476116	477552	-	475000	Q8IBY5	conserved+Plasmodium+protein%2C+unknown+function	6.3	41.1	134.2	76.3	37.6	12.7	8.3	173.4	33.6	523.5	0
PF3D7_0710600	chr7	478468	479138	-	475000	PF07_0043	60S+ribosomal+protein+L34a%2C+putative	1085.6	778.4	1286.8	840.7	538.3	365.1	272.1	335.3	137.2	5639.5	0
PF3D7_0710700	chr7	481369	481974	-	485000	XP_001349020.1	conserved+Plasmodium+protein%2C+unknown+function	34.6	1.5	8.2	0	3.4	0	0	23.9	0	71.6	0
PF3D7_0710800	chr7	482701	483831	-	485000	2655093	conserved+Plasmodium+protein%2C+unknown+function	31.1	16.7	72.3	77.2	82.4	32.5	11.6	212.1	5	540.9	0
PF3D7_0710900	chr7	484838	486037	+	485000	PF07_0046	mitochondrial+ribosomal+protein+L1+precursor%2C+putative	76.4	77.8	126.2	122.5	91.3	52.4	19.1	147.8	14.2	727.7	0
PF3D7_0711000	chr7	487281	490970	-	485000	CAD50861.1	AAA+family+ATPase%2C+CDC48+subfamily+%28Cdc48%29	43.9	216	534.1	402.1	308.1	100.7	49.3	203.3	82.4	1939.9	0
PF3D7_0711100	chr7	492519	493232	-	495000	2655207	conserved+Plasmodium+membrane+protein%2C+unknown+function	118.8	56.2	68.7	55.9	72.5	109.2	194.3	64.3	28.7	768.6	0
PF3D7_0711200	chr7	495238	498240	+	495000	Q8IBX8	conserved+Plasmodium+protein%2C+unknown+function	0	0	5.6	1.3	7.9	1.2	25.7	47	2.3	91	1
PF3D7_0711300	chr7	499336	499695	+	495000	MAL7P1.36	conserved+Plasmodium+protein%2C+unknown+function	254.1	426	496.7	379.8	233.4	187.9	236	488.2	730.3	3432.4	0
PF3D7_0711400	chr7	500408	502594	-	505000	CAD50865.1	sin3+associated+polypeptide+p18-like+protein	18.4	0	19.5	42	27.9	0.9	5.1	8.3	0.3	122.4	0
PF3D7_0711500	chr7	505245	507311	+	505000	MAL7P1.38	regulator+of+chromosome+condensation%2C+putative	137.2	154.3	249.9	181.2	178.7	40.3	10	140.9	132.8	1225.3	0
PF3D7_0711700	chr7	511950	519425	-	515000	VAR	erythrocyte+membrane+protein+1%2C+PfEMP1+%28VAR%29	76.6	31.9	37.8	16.4	36.3	30.1	45.8	132.4	178.1	585.4	0
PF3D7_0711900	chr7	525063	526320	-	525000	2655001	rifin%2C+pseudogene	4.9	1.2	1.5	5.6	0	13.4	11.8	12.9	19.4	70.7	0
PF3D7_0712000	chr7	527338	535131	-	535000	2654960	erythrocyte+membrane+protein+1%2C+PfEMP1+%28VAR%29	183.5	105	129	134	305.5	122.6	60.9	426.9	268.3	1735.7	0
PF3D7_0712200	chr7	540343	541541	-	545000	RIF	rifin%2C+pseudogene+%28RIF%29	7	18.6	12.1	14	12	20	15.4	10	46.5	155.6	0
PF3D7_0712300	chr7	542906	550520	-	545000	rosetting	erythrocyte+membrane+protein+1%2C+PfEMP1+%28VAR%29	16.3	0	11.2	8.2	24	21.2	12.9	50	23.4	167.2	0
PF3D7_0712400	chr7	552158	559078	-	555000	4794183	erythrocyte+membrane+protein+1%2C+PfEMP1+%28VAR%29	85.5	45.9	8.9	1.7	8.7	0.9	17.5	12.9	21.9	203.9	0
PF3D7_0712500	chr7	562906	564160	-	565000	cytoadherencescheme	rifin%2C+pseudogene	3.7	2.1	0	0	4.2	1.2	10.3	1.3	6.6	29.4	0
PF3D7_0712600	chr7	566726	574308	-	575000	Q8IBW9	erythrocyte+membrane+protein+1%2C+PfEMP1+%28VAR%29	29.4	5.9	0	0	1.7	10.6	8.6	20.8	7.8	84.8	0
PF3D7_0712800	chr7	581386	588923	-	585000	VAR	erythrocyte+membrane+protein+1%2C+PfEMP1+%28VAR%29	45	7.6	0.9	0.9	5.4	0	0	10.4	37	107.2	0
PF3D7_0712900	chr7	590326	597733	-	595000	rosetting	erythrocyte+membrane+protein+1%2C+PfEMP1+%28VAR%29	26.1	6.6	14.4	3.6	12.1	19.2	11.1	17	25.1	135.2	0
PF3D7_0713000	chr7	602141	603381	+	605000	rosetting	rifin+%28RIF%29	6.5	0.7	0	0.5	0	2.4	1.3	0	13.7	25.1	0
PF3D7_0713100	chr7	605653	606440	+	605000	CAD50879.1	Pfmc-2TM+Maurer%27s+cleft+two+transmembrane+protein+%28MC-2TM%29	3.7	3.6	0	13.1	0	0	0	0	0	20.4	0
PF3D7_0713200	chr7	607111	607785	-	605000	Q8IBW4	RESA-like+protein	0	0	0	0	0	0	0	0	0	0	0
PF3D7_0713300	chr7	609297	610522	+	605000	MAL7P1.60	erythrocyte+membrane+protein+1+%28PfEMP1%29%2C+pseudogene+%28VAR+pseudogene%29	1691.6	1262.7	1461.9	1928.8	2181.2	2026.2	2228.5	1706.9	3294.6	17782.4	0
PF3D7_0713400	chr7	612458	613740	+	615000	Q8IBW3	serpentine+receptor%2C+putative+%28PfSR25%29	101.8	73.5	86.9	61	158.6	39.1	52.8	60	58	691.7	0
PF3D7_0713500	chr7	614385	617249	+	615000	23498809	conserved+Plasmodium+protein%2C+unknown+function	0	0	0	2.1	0	0	0	3.9	0	6	0
PF3D7_0713600	chr7	617933	620867	+	615000	MAL7P1.66	mitochondrial+ribosomal+protein+S5+precursor%2C+putative	0.3	6.2	53.2	69.6	41.8	44.8	7.1	37	52.9	312.9	0
PF3D7_0713700	chr7	621463	623521	-	625000	XP_002808774.1	conserved+Plasmodium+protein%2C+unknown+function	23.9	0	19.6	26.1	11.4	2.5	0	45.4	45.2	174.1	0
PF3D7_0713800	chr7	624379	625300	-	625000	PF07_0052	conserved+Plasmodium+protein%2C+unknown+function	12	2.1	20.5	38.7	97.5	89.7	0	39.3	31	330.8	0
PF3D7_0713900	chr7	627067	637776	-	635000	296004846	conserved+Plasmodium+protein%2C+unknown+function	60.5	26.8	71.1	45.2	58.1	22.3	0	0.9	0	284.9	0
PF3D7_0714000	chr7	643101	643472	-	645000	NucleoAssembly	histone+H2B+variant%2C+putative+%28H2Bv%29	780	456.1	904.1	910.9	1517.8	875	676.7	313.8	571.3	7005.7	0
PF3D7_0714100	chr7	646719	648767	-	645000	124511828	conserved+Plasmodium+protein%2C+unknown+function	0	2.7	0	0	1.3	7.4	9.7	18.9	6	46	0
PF3D7_0714200	chr7	650834	654919	+	655000	124511830	conserved+Plasmodium+protein%2C+unknown+function	4.6	0	0	0	5.1	0	0	0	0	9.7	0
PF3D7_0714300	chr7	656871	661669	+	655000	PF3D7_0714300	zinc+finger+protein%2C+putative+%28ERF2%29	64.1	38.4	90.4	95.7	116.1	61.9	22.2	289.2	94.6	872.6	0
PF3D7_0714400	chr7	662284	663407	-	665000	MAL7P1.69	calmodulin%2C+putative	0	4.6	21.7	5.6	6.2	0	10.8	9.5	0	58.4	0
PF3D7_0714500	chr7	664956	666167	+	665000	2655101	transcription+elongation+factor+s-II%2C+putative	26.3	26.5	51.3	46.4	55.2	10.5	7.1	18.9	25.8	268	0
PF3D7_0714600	chr7	667985	669712	+	665000	PF07_0058	conserved+Plasmodium+protein%2C+unknown+function	1261.2	743.5	1194.8	991.3	1138.3	640.8	192.4	849.5	2794.7	9806.5	0
PF3D7_0715000	chr7	673451	674419	+	675000	XP_001349053.1	4-nitrophenylphosphatase+%28PNPase%29	7.1	0	2.8	10.6	2.4	4.2	0	0	0	27.1	0
PF3D7_0715100	chr7	674610	675130	-	675000	PF07_0060	conserved+Plasmodium+protein%2C+unknown+function	44.6	36.1	29.9	36.1	25.7	20	36	327.4	52.9	608.7	1
PF3D7_0715200	chr7	676061	682681	-	675000	PF3D7_0715200	conserved+Plasmodium+protein%2C+unknown+function	0	0	49	52.4	155.1	81.8	0	1387.1	18.1	1743.5	0
PF3D7_0715300	chr7	684539	686691	-	685000	Q8IBU7	calcium%2Fcalmodulin-dependent+protein+kinase%2C+putative	0	0	0	0	3.2	0	0	1.4	0	4.6	0
PF3D7_0715400	chr7	687891	688848	-	685000	2655039	secreted+ookinete+protein%2C+putative+%28PSOP20%29	5	36.4	242.1	301.8	226	117	19.2	2750.8	56.1	3754.4	0
PF3D7_0715500	chr7	689543	690057	-	685000	CAD50903.1	mitochondrial+ATP+synthase+F1%2C+epsilon+subunit%2C+putative	10.5	33.2	493.4	441.8	398	140.5	8.5	493.7	55.9	2075.5	0
PF3D7_0715600	chr7	691068	693332	+	695000	PF07_0062	GTP-binding+translation+elongation+factor+tu+family+protein%2C+putative	0.3	26.8	84	101.4	80	42.2	15.1	49.2	4.3	403.3	0
PF3D7_0715700	chr7	694523	694882	+	695000	124511854	conserved+Plasmodium+protein%2C+unknown+function	42	74	172.7	230.7	193.2	242.4	116.4	1058.9	335.9	2466.2	0
PF3D7_0715800	chr7	695600	696904	-	695000	PF07_0064	drug%2Fmetabolite+exporter%2C+drug%2Fmetabolite+transporter	18.3	28.6	129.8	140.3	122.5	40.5	0	263.2	24.5	767.7	0
PF3D7_0715900	chr7	699239	700909	+	705000	transporters	zinc+transporter%2C+putative	1	67.4	454.3	561.7	546.8	237.4	2.4	272.2	104.5	2247.7	0
PF3D7_0716000	chr7	703207	706584	+	705000	PF3D7_0716000	RNA+binding+protein%2C+putative	109.3	61.2	116.1	59	71.7	26.2	4.3	117.5	13.3	578.6	0
PF3D7_0716100	chr7	707699	710908	-	705000	PF3D7_0716100	large+ribosomal+subunit+assembling+factor%2C+putative	111.4	59.3	115.6	47.3	25.7	7.3	33.8	78.5	13.4	492.3	0
PF3D7_0716200	chr7	712469	714967	+	715000	124511864	conserved+Plasmodium+protein%2C+unknown+function	637.5	365.3	385.9	190.2	192.2	166.3	279.5	809.7	36	3062.6	0
PF3D7_0716300	chr7	717281	718968	+	715000	23498834	conserved+Plasmodium+protein%2C+unknown+function	36.1	141	524	563	689.9	353.2	1.4	226	181.5	2716.1	0
PF3D7_0716400	chr7	720010	721467	+	725000	RNApolyIII	conserved+Plasmodium+protein%2C+unknown+function	29.5	6	42.2	72	104.6	41.7	13	248.9	62.5	620.4	0
PF3D7_0716500	chr7	721717	724715	+	725000	C0H4M9	conserved+Plasmodium+protein%2C+unknown+function	30.4	110.2	388.5	391.3	319.2	156.6	52	209.4	131.3	1788.9	0
PF3D7_0716600	chr7	725296	727219	+	725000	PF07_0068	cysteine+desulfurase%2C+putative+%28SufS%29	36.7	47.6	128.6	156.5	154.2	45.7	25.7	143.4	63.2	801.6	0
PF3D7_0716700	chr7	728109	731126	+	725000	2655113	conserved+Plasmodium+protein%2C+unknown+function	13.2	12.9	101.2	85.2	60.7	28	11.6	166.2	98	577	0
PF3D7_0716800	chr7	732070	733496	-	735000	intTranslation	eukaryotic+translation+initiation+factor+3+37.28+kDa+subunit%2C+putative	443.1	320.7	567.6	369.2	221.4	84.1	55.8	295.3	386.3	2743.5	0
PF3D7_0716900	chr7	736370	737338	+	735000	XP_001349072.1	drug+metabolite+transporter%2C+putative	201	272.8	684.6	526.5	311.4	198.3	61.5	666.8	254.2	3177.1	0
PF3D7_0717000	chr7	738578	741209	+	735000	PF3D7_0717000	conserved+Plasmodium+membrane+protein%2C+unknown+function	2.2	0	20.6	109.8	142.2	111.1	0	90.1	28.3	504.3	0
PF3D7_0717100	chr7	742010	744901	+	745000	CAX64051.1	conserved+Plasmodium+protein%2C+unknown+function	15	53.2	85.1	108	93.8	37.1	7.8	32.7	103.9	536.6	0
PF3D7_0717200	chr7	745191	746663	-	745000	MAL7P1.84	conserved+Plasmodium+protein%2C+unknown+function	145.3	111.4	174.2	221	381.5	357	89.5	453.8	244.6	2178.3	0
PF3D7_0717300	chr7	748990	750699	+	745000	PF3D7_0717300	transcription+initiation+factor+IIE%2C+alpha+subunit%2C+putative	118.5	110.3	138.6	127.6	231.3	219.2	11.7	183.5	191.3	1332	0
PF3D7_0717400	chr7	751877	754132	+	755000	nuclearGenes	queuine+tRNA-ribosyltransferase%2C+putative	87	86.5	104.5	77.3	54.9	23.4	25.8	57.4	118.2	635	0
PF3D7_0717500	chr7	755763	757696	+	755000	Q8IBS5.3	calcium+dependent+protein+kinase+4+%28CDPK4%29	60.4	79.4	115.2	264.1	652.9	633.3	28.3	410.4	897.2	3141.2	0
PF3D7_0717600	chr7	758720	762877	-	765000	2655050	conserved+Plasmodium+protein%2C+unknown+function	0	0	0	4	18.9	0	0	152.2	8.2	183.3	0
PF3D7_0717700	chr7	764794	766413	-	765000	PF07_0073	seryl-tRNA+synthetase%2C+putative	148	142.5	273.7	227.7	231.3	122.1	3.8	364.2	22.5	1535.8	0
PF3D7_0717800	chr7	767357	771949	-	765000	CAD50926.1	conserved+Plasmodium+protein%2C+unknown+function	10.2	17.9	44.1	34.9	32.4	14	4.2	434.7	170.6	763	0
PF3D7_0717900	chr7	772951	775264	-	775000	thioredoxinpath	thioredoxin-like+protein	15.8	35.7	84.6	37.7	21.6	1	0	90.9	53.4	340.7	0
PF3D7_0718000	chr7	776141	795637	-	785000	C0H4N5	dynein+heavy+chain%2C+putative	1.3	0	2.1	0.5	0	0	2.4	25	3	34.3	0
PF3D7_0718100	chr7	796514	804739	-	805000	PF3D7_0718100	exported+serine%2Fthreonine+protein+kinase+%28EST%29	0	3.4	20.2	38.7	42.5	2.4	6.4	34.4	0	148	0
PF3D7_0718300	chr7	812301	820635	-	815000	CAD50930.1	cysteine+repeat+modular+protein+2+%28CRMP2%29	0	0	0	0	0	0	0	0	3.6	3.6	0
PF3D7_0718400	chr7	822438	823015	+	825000	Q8IBR7	mitochondrial+ribosomal+protein+S8+precursor%2C+putative	49.6	203	566.6	535	409.5	230.5	41.7	58.2	566.2	2660.3	0
PF3D7_0718500	chr7	824445	825884	+	825000	CAD50932.1	prefoldin+subunit+3%2C+putative	405.5	589.3	895.8	792.2	734.2	509.9	53.5	586.2	158.9	4725.5	0
PF3D7_0718600	chr7	826837	831305	+	825000	MAL7P1.95	conserved+Plasmodium+protein%2C+unknown+function	0	0	4.3	13.7	12.9	0.8	0	7.2	7.5	46.4	0
PF3D7_0718700	chr7	831549	832922	-	835000	124511912	conserved+Plasmodium+membrane+protein%2C+unknown+function	0	15.4	50.2	31	23.7	0	0	19.8	8.8	148.9	0
PF3D7_0718800	chr7	833630	835051	-	835000	PF07_0076	conserved+Plasmodium+protein%2C+unknown+function	1.6	8.7	7.6	4	3.8	12.9	13.8	39.3	32.9	124.6	0
PF3D7_0718900	chr7	835957	836861	+	835000	MAL7P1.97	conserved+Plasmodium+protein%2C+unknown+function	0	7.2	0	9	12.6	0	16.2	13.2	7	65.2	0
PF3D7_0719000	chr7	838135	838596	+	835000	MAL7P1.98	conserved+Plasmodium+protein%2C+unknown+function	6	0	39.7	14.1	0	0	0	18	5.5	83.3	0
PF3D7_0719100	chr7	838990	840024	-	835000	MAL7P1.99	conserved+Plasmodium+protein%2C+unknown+function	18.1	28.2	146.2	211.6	217.5	91	18.1	1573.4	126.2	2430.3	0
PF3D7_0719200	chr7	841108	842830	+	845000	phosphorylation	NIMA+related+kinase+4+%28NEK4%29	4	3.4	4.4	3.8	4.5	14.4	11.8	648.5	23.5	718.3	1
PF3D7_0719300	chr7	844495	847593	+	845000	actin	actin-like+protein%2C+putative	79.7	50.9	134.3	78.7	78.4	10.9	0	164.7	69.6	667.2	0
PF3D7_0719400	chr7	848398	853593	-	855000	2654955	conserved+Plasmodium+protein%2C+unknown+function	0	1.2	29	45.3	66.3	33	0	195.3	11.9	382	0
PF3D7_0719500	chr7	854652	856654	-	855000	PF07_0078	conserved+membrane+protein%2C+unknown+function	0	0	11.2	44.5	84.4	22.9	0	38.7	64.3	266	0
PF3D7_0719700	chr7	861583	862487	+	865000	23498866	40S+ribosomal+protein+S10%2C+putative	942	767.4	980	602.9	409.1	107.9	81.9	144.2	98.8	4134.2	0
PF3D7_0719800	chr7	863452	864813	-	865000	23498867	conserved+Plasmodium+protein%2C+unknown+function	123.4	102.4	134.9	169.3	187.9	99.9	20.6	268.1	191.9	1298.4	0
PF3D7_0719900	chr7	865927	876132	+	875000	XP_001349100.1	conserved+Plasmodium+membrane+protein%2C+unknown+function	12.7	15.5	21.2	10.4	37.4	6.9	8	16	0	128.1	0
PF3D7_0720000	chr7	876795	877500	+	875000	Q8IBQ2	3%27-5%27+exoribonuclease+Csl4+homolog%2C+putative	20.1	51.7	49.8	42.1	37.4	12	7.2	79	18.9	318.2	0
PF3D7_0720100	chr7	877865	878632	-	875000	PF07_0083	small+subunit+rRNA+processing+protein%2C+putative	53.8	3.7	43.3	32.1	11.5	1.4	14.8	98.3	102.3	361.2	0
PF3D7_0720200	chr7	879454	879946	+	875000	PF3D7_0720200	conserved+Plasmodium+protein%2C+unknown+function	100.6	65.4	135.5	60.7	69.5	45.1	32.1	100	88.8	697.7	0
PF3D7_0720300	chr7	880465	880863	-	885000	23498872	conserved+Plasmodium+protein%2C+unknown+function	0	7.2	0	0	0	0	2.8	0	4.5	14.5	0
PF3D7_0720400	chr7	882936	884988	+	885000	nuclearGenes	ferrodoxin+reductase-like+protein	51.3	73.4	283.2	130.3	104.3	40.3	0	20	103.6	806.4	0
PF3D7_0720500	chr7	886346	887487	+	885000	C0H4N9	conserved+Plasmodium+protein%2C+unknown+function	67.5	263.9	646.4	690.3	635.6	387.7	33.8	1298.3	131.1	4154.6	0
PF3D7_0720600	chr7	887816	889378	-	885000	PF3D7_0720600	conserved+Plasmodium+protein%2C+unknown+function	230	166.6	214.5	227.8	304.6	125.4	7.1	97.4	20.9	1394.3	0
PF3D7_0720700	chr7	891683	899051	+	895000	MAL7P1.108	phosphoinositide-binding+protein%2C+putative	334.8	160.9	156.6	187.9	402.8	278.7	14.5	228.7	741.4	2506.3	0
PF3D7_0720800	chr7	899751	901137	+	905000	MAL7P1.110	Ham1-like+protein%2C+putative	8.6	21.2	187.2	149	85.5	35.6	0	145.4	105.4	737.9	0
PF3D7_0720900	chr7	901549	902787	+	905000	Q8IBP2	conserved+Plasmodium+protein%2C+unknown+function	0	0	6.6	10	12.4	0	8.8	17.5	16	71.3	0
PF3D7_0721000	chr7	904143	914671	+	905000	PF07_0086	conserved+Plasmodium+membrane+protein%2C+unknown+function	32.5	44.2	74.4	66.7	120.3	36.5	3.1	69.1	123.3	570.1	0
PF3D7_0721100	chr7	916434	917168	+	915000	XP_001349113.1	conserved+Plasmodium+protein%2C+unknown+function	21.6	37.6	150.4	76.3	121.3	21.4	3	106.8	59	597.4	0
PF3D7_0721200	chr7	917958	920816	-	915000	CAD50960.1	conserved+Plasmodium+protein%2C+unknown+function	7	0	4.9	0.4	0	0	0	6.3	0	18.6	0
PF3D7_0721300	chr7	922285	924984	+	925000	XP_001349115.1	DEAD%2FDEAH+box+ATP-dependent+RNA+helicase%2C+putative	228.5	179.8	256.7	113	71.4	22.9	29.6	63.1	133.6	1098.6	0
PF3D7_0721400	chr7	926692	928028	+	925000	MAL7P1.114	P36-like+protein+homologue%2C+putative	16.8	28.4	182.2	213	191.8	83.2	0	110.5	0	825.9	0
PF3D7_0721500	chr7	928514	930853	+	925000	23498885	conserved+Plasmodium+membrane+protein%2C+unknown+function	0	0	8.7	20.3	23.1	2.5	0	55.2	5	114.8	0
PF3D7_0721600	chr7	931459	932164	-	935000	CAD50964.1	40S+ribosomal+protein+S5%2C+putative	1210.7	1613.8	1871.8	1094.4	956.5	357.1	242.5	299.3	120.7	7766.8	0
PF3D7_0721700	chr7	935497	936900	+	935000	Q8IBN4	secreted+ookinete+protein%2C+putative+%28PSOP1%29	0	0.1	1	0	9.7	0	2.7	228.4	12.9	254.8	1
PF3D7_0721800	chr7	938279	938895	+	935000	PF3D7_0721800	conserved+Plasmodium+protein%2C+unknown+function	45.5	65.8	70.5	57.4	90.7	36.1	63.4	31.9	31.2	492.5	0
PF3D7_0722000	chr7	941776	942513	+	945000	Q8IBN2	conserved+Plasmodium+protein%2C+unknown+function	42.2	20.3	55.9	31.3	28.3	15.3	2.2	285.7	45.1	526.3	0
PF3D7_0722100	chr7	944023	945234	+	945000	Q8I6Z3	PelOta+protein+homologue%2C+putative	32	4.8	30.6	25	33.4	3.3	1.7	9.7	0	140.5	0
PF3D7_0722200	chr7	946363	948612	+	945000	RALP1	rhoptry-associated+leucine+zipper-like+protein+1+%28RALP1%29	0	0	0	22.4	156.4	176.2	0	11.9	0	366.9	0
PF3D7_0722300	chr7	949449	953114	-	955000	proteaUbiqpath	ubiquitin+carboxyl-terminal+hydrolase%2C+putative	312	141.2	319.3	166.4	139.2	61	28.4	95.4	362.8	1625.7	0
PF3D7_0722400	chr7	954784	956343	+	955000	2655188	GTP+binding+protein%2C+putative	88.2	62.1	158	95.7	83.6	65	46.4	3.9	17.1	620	0
PF3D7_0722500	chr7	956920	958017	-	955000	124511986	cell+cycle+control+protein+cwf15%2C+putative	184.1	176.7	199.5	194.3	169.7	102	38.6	414	62.2	1541.1	0
PF3D7_0722600	chr7	958886	960694	-	955000	124511988	nucleolar+rRNA+processing+protein%2C+putative	236.7	186.8	246.9	186.7	218.5	108.5	83	569.5	154.2	1990.8	0
PF3D7_0722700	chr7	962031	962447	+	965000	PF3D7_0722700	conserved+Plasmodium+protein%2C+unknown+function	92.7	56.8	142.3	200.8	233.3	240.6	81.2	312.3	42	1402	0
PF3D7_0722800	chr7	963370	965109	+	965000	23498897	conserved+Plasmodium+protein%2C+unknown+function	16.4	11.3	11.4	20.6	19.3	5.7	10.5	1827.5	43.2	1965.9	1
PF3D7_0722900	chr7	965664	967782	-	965000	Q8IBM4	conserved+Plasmodium+protein%2C+unknown+function	28.8	38.7	28.4	27.3	49.3	36.6	35.1	72.6	100.6	417.4	0
PF3D7_0723000	chr7	968836	969735	-	965000	PF07_0095	tRNAHis+guanylyltransferase%2C+putative	13.6	28.1	63.1	30	10	12	8.4	8	3.6	176.8	0
PF3D7_0723100	chr7	970492	971877	-	975000	124511998	conserved+Plasmodium+protein%2C+unknown+function	0	0	0	0	0	0	0	38.8	0	38.8	1
PF3D7_0723200	chr7	972658	974272	+	975000	Q8IBM1	conserved+Plasmodium+protein%2C+unknown+function	16.4	0	18.9	15.6	4	17.5	43.6	38.1	37.5	191.6	0
PF3D7_0723300	chr7	975766	978408	+	975000	2655148	conserved+Plasmodium+protein%2C+unknown+function	0	0	0	42.3	127.2	87.2	0	1008.4	1396.7	2661.8	0
PF3D7_0723400	chr7	978920	983188	-	985000	CAD50981.1	conserved+Plasmodium+protein%2C+unknown+function	99.7	25.7	51.5	31.1	11.6	2.3	6	10.2	69.2	307.3	0
PF3D7_0723500	chr7	984778	985458	-	985000	23498904	dynactin+4%2C+putative	34.7	5	7.3	0.1	0	0	0	7.3	16.8	71.2	0
PF3D7_0723600	chr7	986598	987365	+	985000	PF07_0099	conserved+Plasmodium+protein%2C+unknown+function	58.8	60	62.7	18.7	24.2	6.2	3.2	36.8	22.2	292.8	0
PF3D7_0723700	chr7	988145	991243	+	985000	PF07_0100	conserved+Plasmodium+protein%2C+unknown+function	60.1	29.5	66.3	34.9	70.1	33.3	40.6	124	174.8	633.6	0
PF3D7_0723800	chr7	993232	1000233	+	995000	XP_001349139.1	conserved+Plasmodium+protein%2C+unknown+function	11	14.7	38.6	51.8	103.3	81.6	5.7	69.4	44.8	420.9	0
PF3D7_0723900	chr7	1000701	1004746	-	1005000	PF3D7_0723900	conserved+Plasmodium+protein%2C+unknown+function	86.1	37.8	40.3	52.8	53.6	3.7	0	13.1	6.6	294	0
PF3D7_0724000	chr7	1006335	1012145	+	1005000	225632176	conserved+Plasmodium+membrane+protein%2C+unknown+function	35.1	72.1	156.1	183.5	232.3	139.9	48.5	128.7	65.7	1061.9	0
PF3D7_0724100	chr7	1013295	1016449	-	1015000	CAD50989.1	conserved+Plasmodium+protein%2C+unknown+function	19.1	11.2	31.4	9.6	23.3	12	0	127.1	52.2	285.9	0
PF3D7_0724200	chr7	1019384	1020667	-	1025000	Pkno005211AAA	immunoglobulin-binding+protein+1-related%2C+putative	1.5	1.5	16.4	4.3	7.2	0	0	16.9	0.1	47.9	0
PF3D7_0724300	chr7	1021508	1022630	+	1025000	PF3D7_0724300	3-demethylubiquinone-9+3-methyltransferase%2C+putative	0	8.6	30.9	35.4	20.5	11.7	16.5	23.8	30.2	177.6	0
PF3D7_0724400	chr7	1023651	1024121	+	1025000	XP_001349146.1	mitochondrial+import+inner+membrane+translocase+subunit+tim14%2C+putative	239.9	146.1	208.2	138.1	146.4	126.6	267.8	163.7	261.6	1698.4	0
PF3D7_0724500	chr7	1024672	1026167	+	1025000	124512028	conserved+Plasmodium+protein%2C+unknown+function	0	1.1	0	0	0	0	0	5.9	0	7	0
PF3D7_0724600	chr7	1026444	1033077	-	1025000	PF3D7_0724600	conserved+Plasmodium+protein%2C+unknown+function	28.1	53.1	114.1	195.4	230.5	138.8	34.6	59.5	79.1	933.2	0
PF3D7_0724700	chr7	1034969	1046109	-	1045000	MAL7P1.134	conserved+Plasmodium+protein%2C+unknown+function	246.8	188.9	253.5	183.3	112.4	33.5	13.3	85.7	56.9	1174.3	0
PF3D7_0724800	chr7	1047427	1049362	-	1045000	12368867	kelch+protein%2C+putative	28.4	24.2	32.3	50.1	77.9	85.3	27.5	161	251.3	738	0
PF3D7_0724900	chr7	1052465	1058158	+	1055000	PF07_0104	kinesin-like+protein%2C+putative	0	0	0	0	0	16.2	0	280.4	9	305.6	1
PF3D7_0725000	chr7	1058933	1062976	-	1065000	2655158	exonuclease+I%2C+putative	0	0	24.3	22.7	34.7	7.6	0	36	54.4	179.7	0
PF3D7_0725100	chr7	1065252	1070240	+	1065000	23498922	conserved+Plasmodium+membrane+protein%2C+unknown+function	34.1	18.1	28.1	23.8	14.8	10.9	9.2	20.5	33.7	193.2	0
PF3D7_0725200	chr7	1070980	1071737	+	1075000	Q8IBJ9	mago+nashi+protein+homolog%2C+putative	208.5	162.8	307.2	291.3	219.1	105	39.2	332.5	156.8	1822.4	0
PF3D7_0725300	chr7	1072202	1074754	-	1075000	PF07_0106	conserved+Plasmodium+protein%2C+unknown+function	124.1	110.2	129.7	58.3	35.1	32.2	7.7	27.8	33.1	558.2	0
PF3D7_0725400	chr7	1079015	1080055	+	1075000	CAD51003.1	conserved+Plasmodium+protein%2C+unknown+function	217	116.1	64.5	179.2	1378.4	2020.4	180.9	112.9	163.6	4433	0
PF3D7_0726100	chr7	1093566	1096122	-	1095000	PF07_0107	Plasmodium+exported+protein%2C+unknown+function	28.4	0	4	1.2	0	2.8	0	2.8	1.8	41	0
PF3D7_0726200	chr7	1100134	1102967	+	1105000	225632179	serine%2Fthreonine+protein+kinase%2C+FIKK+family+%28FIKK7.1%29	244.5	442.8	381.4	101	34.8	24.2	38	437.6	44.5	1748.8	0
PF3D7_0726300	chr7	1104156	1108364	+	1105000	MAL7P1.145	mismatch+repair+protein+pms1+homologue%2C+putative	64.9	28.6	54	95.7	104	54.9	17.1	98.9	35.1	553.2	0
PF3D7_0726400	chr7	1108831	1124492	-	1115000	XP_002808791.1	conserved+Plasmodium+membrane+protein%2C+unknown+function	67.9	6.2	32.4	39.5	82.5	15.3	0	13.2	8.8	265.8	0
PF3D7_0726500	chr7	1126556	1136577	-	1135000	Q8IBJ1	ubiquitin+carboxyl-terminal+hydrolase%2C+putative	101.9	68.5	113	109.7	86	26.8	4	119.2	162.6	791.7	0
PF3D7_0726600	chr7	1140479	1142754	+	1145000	23498932	conserved+Plasmodium+protein%2C+unknown+function	0	7.7	56.3	69.8	43.2	22.8	0.4	142.2	29.4	371.8	0
PF3D7_0726700	chr7	1143303	1143815	-	1145000	XP_001349165.1	conserved+Plasmodium+protein%2C+unknown+function	3.8	13.1	25.1	25.5	56.3	12.9	2.2	56.3	7.2	202.4	0
PF3D7_0726900	chr7	1145648	1147207	+	1145000	PF07_0110	protein+phosphatase%2C+putative	21.7	38.8	101.8	62.3	38.4	23.7	0.3	43.9	88.4	419.3	0
PF3D7_0727000	chr7	1147570	1151058	-	1145000	PF07_0111	conserved+Plasmodium+protein%2C+unknown+function	0.8	4.1	2.6	9.3	13.9	10.6	0	119.2	36.1	196.6	0
PF3D7_0727100	chr7	1152155	1155355	-	1155000	296004893	conserved+Plasmodium+protein%2C+unknown+function	36.4	12.2	104.8	81.1	113.4	25	29	112.3	76.5	590.7	0
PF3D7_0727200	chr7	1156748	1158409	-	1155000	vitaminB6metpath	cysteine+desulfurase%2C+putative+%28NFS%29	135.7	70.7	114.8	65.8	28.5	2.7	4	318.5	312.3	1053	0
PF3D7_0727300	chr7	1159700	1161820	-	1165000	11738814	DNA+%28cytosine-5%29-methyltransferase%2C+putative+%28DNMT2%29	9.9	2	3.4	6.6	1.8	0	0	0.3	0	24	0
PF3D7_0727400	chr7	1162710	1163831	+	1165000	Q8IBI3	proteasome+subunit+alpha+type+5%2C+putative	120.3	125.2	267.1	251.9	303.7	120.4	7.9	34.6	62.6	1293.7	0
PF3D7_0727500	chr7	1164455	1166578	-	1165000	124512078	conserved+Plasmodium+protein%2C+unknown+function	0	5.3	27.2	22.2	27.6	7.7	0	0.8	0	90.8	0
PF3D7_0727600	chr7	1167441	1170817	+	1165000	MAL7P1.152	conserved+Plasmodium+protein%2C+unknown+function	0	14.4	11.7	7	14.4	0	0	0	0	47.5	0
PF3D7_0727700	chr7	1171286	1174156	-	1175000	XP_001349174.1	conserved+Plasmodium+protein%2C+unknown+function	11.1	19.2	74.7	69.7	74.8	30.5	0	22.4	0	302.4	0
PF3D7_0727800	chr7	1175944	1181700	+	1175000	PF07_0115	cation+transporting+ATPase%2C+putative	6.1	1.2	14.8	10.3	12.6	1.3	0	24.1	11.4	81.8	0
PF3D7_0727900	chr7	1184401	1190172	+	1185000	124512086	conserved+Plasmodium+protein%2C+unknown+function	8.8	0.8	2.6	0	0	0	0	5.4	2.6	20.2	0
PF3D7_0728000	chr7	1191179	1192289	-	1195000	2655170	eukaryotic+translation+initiation+factor+2+alpha+subunit%2C+putative	164.9	85.1	180.4	126.3	75.7	76.9	81.4	35.5	18.9	845.1	0
PF3D7_0728100	chr7	1193616	1210301	-	1205000	2655171	conserved+Plasmodium+membrane+protein%2C+unknown+function	0	0	18.8	25.1	32.6	7.2	0	6.5	2.2	92.4	0
PF3D7_0728200	chr7	1211657	1213517	+	1215000	CAD51025.1	actin-like+protein%2C+putative	6.7	10	25.1	75	94.7	32.8	15.3	157.7	110.8	528.1	0
PF3D7_0728300	chr7	1213841	1214476	-	1215000	23498948	conserved+Plasmodium+protein%2C+unknown+function	7.5	13.5	74	74	66.7	25.2	15.9	471.5	14	762.3	0
PF3D7_0728400.1	chr7	1215174	1215763	+	1215000	MAL7P1.154	conserved+Plasmodium+protein%2C+unknown+function	0	0	0	0	0	0	0	3.6	0	3.6	0
PF3D7_0728600	chr7	1218426	1225473	+	1225000	124512098	zinc+finger%2C+C3HC4+type%2C+putative	11.6	6.4	78.3	174.9	190.5	113.1	14.5	575.9	543.1	1708.3	0
PF3D7_0728700	chr7	1226029	1228714	-	1225000	XP_001349183.1	conserved+Plasmodium+protein%2C+unknown+function	0	1	2.3	4	3.8	1.4	0	852.6	1092.5	1957.6	1
PF3D7_0728800	chr7	1230589	1232180	+	1235000	CAD51030.1	conserved+Plasmodium+protein%2C+unknown+function	1.6	19.1	77	75.9	89.1	22.8	2	53.7	201.6	542.8	0
PF3D7_0729000	chr7	1235699	1236707	+	1235000	SRP9	signal+recognition+particle+SRP9+%28SRP9%29	118.2	76.3	138	88.7	77.2	65.7	35.4	182.7	0	782.2	0
PF3D7_0729100	chr7	1238446	1246188	+	1245000	PF07_0120	conserved+Plasmodium+protein%2C+unknown+function	0	0	0	3.7	5.2	0	0	0	0	8.9	0
PF3D7_0729200	chr7	1247398	1248264	+	1245000	34591895	1-cys+peroxiredoxin+%28AOP%29	0	0	4.9	0.7	0	0	1.4	0	14.2	21.2	0
PF3D7_0729300	chr7	1248837	1251503	-	1255000	PF3D7_0729300	60S+ribosomal+subunit+export+protein%2C+putative	734.6	724.3	874.3	467.8	256.2	245.4	372.3	190	342.9	4207.8	0
PF3D7_0729400	chr7	1252847	1254097	+	1255000	Q8IBG5	BRIX+protein%2C+putative	70.1	59.6	75.2	51.8	41.4	27.7	79.3	69.6	99.6	574.3	0
PF3D7_0729500	chr7	1255371	1257653	+	1255000	PF3D7_0729500	mRNA+%28N6-adenosine%29-methyltransferase%2C+putative	83.2	70.4	79.4	64.8	36.7	31.4	25.5	55	110.9	557.3	0
PF3D7_0729700	chr7	1260154	1262780	-	1265000	124512118	conserved+Plasmodium+protein%2C+unknown+function	0	0	0.5	10.3	25.5	15	3.1	65.7	0	120.1	0
PF3D7_0729900	chr7	1265910	1281347	+	1275000	PF3D7_0729900	dynein+heavy+chain%2C+putative	5.3	0	4.7	12.4	5.9	7.9	7.4	125.8	112.1	281.5	1
PF3D7_0730000	chr7	1281785	1282322	-	1285000	MAL7P1.163	conserved+Plasmodium+protein%2C+unknown+function	22.3	15.3	83.3	38.7	45.1	0	1.4	58.3	36.8	301.2	0
PF3D7_0730100	chr7	1282913	1285519	+	1285000	2655178	tRNA+pseudouridine+synthase+D%2C+putative	0	0.4	2.8	1.3	0	0	0	6.4	0	10.9	0
PF3D7_0730200	chr7	1286057	1289399	-	1285000	XP_001349197.2	adapter-related+protein%2C+putative	10.2	5	9.8	2.4	12.1	0	10.9	0	0	50.4	0
PF3D7_0730300	chr7	1297459	1301454	+	1295000	23498967	transcription+factor+with+AP2+domain%28s%29+%28ApiAP2%29	926.8	327.1	851.8	340	331.5	372.7	468.3	37.4	318.5	3974.1	0
PF3D7_0730400	chr7	1304347	1305096	+	1305000	XP_001349200.1	conserved+Plasmodium+protein%2C+unknown+function	0	0	0	1	37.1	0	7.4	37.9	32.3	115.7	0
PF3D7_0730500	chr7	1305894	1314215	-	1315000	PF3D7_0730500	conserved+Plasmodium+protein%2C+unknown+function	0	0	0.1	27.2	5.4	0	0	2.6	0	35.3	0
PF3D7_0730800.1	chr7	1321306	1322367	+	1325000	2654992	Plasmodium+exported+protein%2C+unknown+function	2906.5	1317.9	793.9	147.6	213.5	837.8	4244.1	16.7	18.2	10496.2	0
PF3D7_0730900	chr7	1325375	1331813	+	1325000	CAD51050.1	Plasmodium+exported+protein%2C+unknown+function	314.6	178.3	181.3	24.8	10.9	7.9	78.2	0	0	796	0
PF3D7_0731100	chr7	1338959	1341790	+	1345000	MAL7P1.172	Plasmodium+exported+protein+%28PHISTc%29%2C+unknown+function+%28GEXP11%29	1121.8	332.8	170.2	89.4	117.6	255.6	684.5	24.3	2.9	2799.1	0
PF3D7_0731200	chr7	1342842	1343996	-	1345000	XP_001349205.1	Plasmodium+exported+protein%2C+unknown+function	16.4	0	0	5.1	0	0	43.5	0	0	65	0
PF3D7_0731300	chr7	1350032	1351149	+	1355000	124512146	Plasmodium+exported+protein+%28PHISTb%29%2C+unknown+function+%28PfG174%29	1150	402	643	255.6	193.4	136.8	451.3	3.7	5	3240.8	0
PF3D7_0731400	chr7	1353758	1355482	+	1355000	2654997	serine%2Fthreonine+protein+kinase%2C+FIKK+family%2C+pseudogene+%28FIKK7.2%29	45.2	80.4	206.7	122.5	78.3	42.7	24.2	1.8	26.3	628.1	0
PF3D7_0731500	chr7	1358055	1362929	+	1365000	CAD51055.2	erythrocyte+binding+antigen-175+%28EBA175%29	234.1	30.1	14.3	16.8	230.8	819.2	998.5	0	0	2343.8	0
PF3D7_0731600	chr7	1368161	1370596	+	1365000	CAD51056.1	acyl-coA+synthetase%2C+PfACS5+%28ACS5%29	114.3	185.2	340.4	339.6	333.4	110.6	36.5	37	70.3	1567.3	0
PF3D7_0731700	chr7	1372063	1372760	+	1375000	CAD51057.1	Plasmodium+exported+protein+%28hyp9%29%2C+unknown+function	14	16.6	19.9	20.1	28.5	40.7	4.5	1.4	26.4	172.1	0
PF3D7_0731800	chr7	1378618	1380769	+	1375000	296004913	alpha%2Fbeta+hydrolase%2C+putative+%28GEXP08%29	67.5	3.4	1.2	3.8	12	15.4	81.7	46	1.6	232.6	0
PF3D7_0732000	chr7	1385635	1386626	+	1385000	2655182	stevor+%28stevor%29	24.3	10.7	16.2	6.6	13.6	0	29.2	28.4	110.3	239.3	0
PF3D7_0732100	chr7	1387753	1389037	+	1385000	cytoadherencescheme	erythrocyte+membrane+protein+1+%28PfEMP1%29%2C+pseudogene+%28VAR+pseudogene%29	8	0	0.6	0	0	0	0	3.9	10.1	22.6	0
PF3D7_0732200	chr7	1390711	1392043	+	1395000	PF3D7_0732200	rifin+%28RIF%29	11.7	35.7	33	14.3	9.1	6.6	14.1	6.2	44	174.7	0
PF3D7_0732300	chr7	1396437	1397639	-	1395000	Q8IBE3	rifin+%28RIF%29	7.9	8.2	14	12	8.1	5.8	17.9	15.2	53.5	142.6	0
PF3D7_0732400	chr7	1399452	1400682	-	1405000	cytoadherencescheme	rifin+%28RIF%29	0.7	3.3	3.2	2.6	3	0	2.6	8.1	34.2	57.7	0
PF3D7_0732500	chr7	1402623	1403978	-	1405000	MAL7P1.185	rifin+%28RIF%29	11.6	13.1	17	2.5	13.9	22.6	29.7	35.2	102.9	248.5	0
PF3D7_0732900	chr7	1414434	1415683	+	1415000	23498986	rifin+%28RIF%29	0	8.7	2.6	8.2	4.4	0	5.1	1.8	17.6	48.4	0
PF3D7_0733000	chr7	1417588	1426234	-	1425000	rosetting	erythrocyte+membrane+protein+1%2C+PfEMP1+%28VAR%29	107.3	92.7	53.1	51.7	56	50.8	69.9	51.7	130.8	664	0
PF3D7_0800100	chr8	21361	28653	+	25000	cytoadherencescheme	erythrocyte+membrane+protein+1%2C+PfEMP1+%28VAR%29	71.4	147.4	75.3	51.8	70.4	85.8	32.1	50.6	129.8	714.6	0
PF3D7_0800200	chr8	29700	39033	-	35000	PF08_0141	erythrocyte+membrane+protein+1%2C+PfEMP1+%28VAR%29	26.8	16.8	5.7	17.4	6	19.7	5.5	14.5	17.4	129.8	0
PF3D7_0800300	chr8	40948	50939	+	45000	2655305	erythrocyte+membrane+protein+1%2C+PfEMP1+%28VAR%29	34.7	50.9	46.6	39.1	41.5	38.1	82.8	49.9	61	444.6	0
PF3D7_0800500	chr8	56352	57703	-	55000	PF3D7_0800500	rifin+%28RIF%29	20.9	9.3	26.2	21.8	11.6	27.3	18.2	8.1	69	212.4	0
PF3D7_0800600	chr8	61138	62135	-	65000	23499278	Plasmodium+exported+protein+%28PHISTa%29%2C+unknown+function	1591.2	1234.5	1454.4	1916.2	2176.9	2003.7	2213.2	1645	3269.4	17504.5	0
PF3D7_0800700	chr8	65716	71785	-	65000	cytoadherencescheme	surface-associated+interspersed+gene+8.3+%28SURFIN8.3%29+%28SURF8.3%29	1.2	0	0	15.6	0	0	0	33.8	25.9	76.5	0
PF3D7_0800800	chr8	79823	80642	+	85000	MAL8P1.161	Plasmodium+exported+protein+%28hyp7%29%2C+unknown+function	48	140.6	56.6	35.6	49.4	77.6	9.7	11.4	29	457.9	0
PF3D7_0800900	chr8	83128	83904	+	85000	PF3D7_0800900	Plasmodium+exported+protein+%28hyp7%29%2C+unknown+function	32.8	15.1	1.8	0	1.4	30.7	75.5	0	20.8	178.1	0
PF3D7_0801000	chr8	84568	88422	-	85000	124512744	Plasmodium+exported+protein+%28PHISTc%29%2C+unknown+function	143.1	55.5	105.2	39.5	26	33.9	26.5	23	0	452.7	0
PF3D7_0801400	chr8	104525	104888	-	105000	2655334	probable+protein%2C+unknown+function	20.7	32.5	20.6	21.1	31.7	8.7	18	23.5	19.6	196.4	0
PF3D7_0801500	chr8	106593	108242	-	105000	CAD51350.1	conserved+Plasmodium+protein%2C+unknown+function	41.3	18.3	38.5	17.8	25.9	0	10	16.3	30.8	198.9	0
PF3D7_0801600	chr8	109180	109557	-	105000	23499269	conserved+Plasmodium+protein%2C+unknown+function	2.4	0	10.8	16.7	28	0	0	82.8	0	140.7	0
PF3D7_0801700	chr8	112299	117877	+	115000	proteases	sentrin-specific+protease+2%2C+putative+%28SENP2%29	21.8	46.4	87.9	83.7	40.2	16.6	10.1	66.5	14.7	387.9	0
PF3D7_0801800	chr8	119032	122067	-	125000	124512730	mannose-6-phosphate+isomerase%2C+putative	59	59.3	149.6	77.6	75.1	8.8	4.2	11.7	22	467.3	0
PF3D7_0801900	chr8	128849	142837	+	135000	MAL8P1.154	conserved+Plasmodium+protein%2C+unknown+function	22.9	4.9	21.4	16.4	14.1	2.5	2.4	171.3	202.8	458.7	1
PF3D7_0802000	chr8	146089	150282	+	145000	nitrogenmetpath	glutamate+dehydrogenase%2C+putative+%28GDHc%29	368.8	687.8	1106	726.4	696	361.2	3.4	240.8	1146.4	5336.8	0
PF3D7_0802100	chr8	151808	159668	-	155000	Q8IAM1	transcription+factor+with+AP2+domain%28s%29+%28ApiAP2%29	0	0	0	10.1	39.3	12.5	0	44.5	61.7	168.1	0
PF3D7_0802200	chr8	165416	166078	+	165000	PF08_0131	1-cys+peroxiredoxin+%281-cyspxn%29	248.4	866.6	1652.8	1496.5	1406.3	663.6	35.7	208.9	82.2	6661	0
PF3D7_0802300	chr8	167069	170434	-	165000	Q8IAM3	rRNA+processing+WD-repeat+protein%2C+putative	61.4	44.3	94.7	26.3	11.7	11.8	15.3	49.8	71.4	386.7	0
PF3D7_0802400	chr8	171865	174385	+	175000	XP_001349490.1	conserved+Plasmodium+protein%2C+unknown+function	158.6	93.1	158.7	107.9	79.1	35.2	27.6	110.4	132.4	903	0
PF3D7_0802500	chr8	174647	178906	-	175000	C0H4Q9	inositol+phosphatase%2C+putative	71.9	41.3	58.1	50.6	152.7	81.2	8.3	50.6	115.2	629.9	0
PF3D7_0802600	chr8	180563	188113	+	185000	CAX64087.1	adenylyl+cyclase+beta%2C+putative+%28ACbeta%29	79.7	159	141.3	330.6	926.6	1567	150.5	275.2	227.1	3857	0
PF3D7_0802700	chr8	188566	190316	+	185000	MAL8P1.149	conserved+Plasmodium+protein%2C+unknown+function	0	0	0	0	6	0	0	77.8	0	83.8	1
PF3D7_0802800	chr8	191976	194103	+	195000	Phos_tmd_exprs	serine%2Fthreonine+protein+phosphatase%2C+putative	11.7	25.5	9.5	69	236.9	296.4	21.9	165.4	379.1	1215.4	0
PF3D7_0802900	chr8	195148	195678	-	195000	MAL8P1.148	conserved+Plasmodium+protein%2C+unknown+function	0	0	0	7.3	0	0	0	31	3.2	41.5	0
PF3D7_0803000	chr8	196581	198614	+	195000	Q8IAN0	peptidyl-prolyl+cis-trans+isomerase+%28CYP81%29	19.3	24.6	19.8	13.5	20.9	0.9	0	33.8	34.5	167.3	0
PF3D7_0803100	chr8	199181	202918	-	205000	XP_001349483.1	conserved+Plasmodium+protein%2C+unknown+function	29.4	12.2	33.5	3.1	24.1	6.7	9	56.6	38	212.6	0
PF3D7_0803200	chr8	204241	206661	-	205000	XP_001349482.1	filament+assembling+protein%2C+putative	0	0	0.1	41.6	107.5	79.6	0	351.1	10.6	590.5	0
PF3D7_0803300	chr8	208451	210291	+	205000	Protein_kinases	mitogen-activated+protein+kinase+organizer+1%2C+putative+%28PfMORG1%29	10.1	0	27.3	15.8	55.7	0	4.2	156.5	54.5	324.1	0
PF3D7_0803400	chr8	212252	215971	+	215000	CAD51329.1	DNA+repair+protein+rad54%2C+putative	50.9	33.1	101	123.7	200.8	74.2	57	2117.9	395	3153.6	1
PF3D7_0803500	chr8	217888	222291	+	225000	23499248	AAA+family+ATPase%2C+putative	21.9	30.5	32	24.1	42.9	120.9	0	6.3	5.7	284.3	0
PF3D7_0803700	chr8	231398	232756	+	235000	XP_001349477.1	tubulin+gamma+chain+%28g-tub%29	0	33.3	181.8	189.9	181.9	64.9	6.1	185.7	32	875.6	0
PF3D7_0803800	chr8	233467	234426	-	235000	MAL8P1.142	20S+proteasome+beta+subunit	397.3	469.2	812.7	1079.8	1097.9	697.1	47.1	863.9	82.7	5547.7	0
PF3D7_0804000	chr8	237853	241048	+	235000	Q8IAN8	cactin+homolog%2C+putative	46.2	74.2	84.1	59.1	56.8	38	77.2	36.8	114.4	586.8	0
PF3D7_0804300	chr8	242103	244775	+	245000	XP_001349474.1	conserved+Plasmodium+protein%2C+unknown+function	21.9	4.8	12.3	0	2.4	0	0	67.6	0	109	1
PF3D7_0804400	chr8	245711	247933	+	245000	PF3D7_0804400	methionine+aminopeptidase+1c%2C+putative+%28MetAP1c%29	0	0	4.7	15.3	19.6	1.1	0	8.7	0	49.4	0
PF3D7_0804500	chr8	250083	268437	+	255000	MAL8P1.139	conserved+Plasmodium+membrane+protein%2C+unknown+function	136.2	220.1	340.4	376.3	472.5	214.5	9.5	189.5	106.7	2065.7	0
PF3D7_0804600	chr8	268856	270696	-	265000	PF08_0123	U2+snRNA%2FtRNA+pseudouridine+synthase%2C+putative	41.6	13	63.2	39.5	14.2	0.7	9.7	20	13.6	215.5	0
PF3D7_0804700	chr8	271417	277413	-	275000	PF3D7_0804700	conserved+Plasmodium+protein%2C+unknown+function	8.3	9.5	8.1	16.4	14.3	4.8	17	625.8	108.4	812.6	1
PF3D7_0804800	chr8	278381	279034	+	275000	2655320	peptidyl-prolyl+cis-trans+isomerase+%28CYP24%29	180	62.2	115.2	107.2	63.3	39.8	28.3	95.2	12.8	704	0
PF3D7_0804900	chr8	279711	281186	-	285000	PF08_0120	GTPase+activator%2C+putative	34.3	14.8	42	14	66.4	42.5	33.2	32.9	9.2	289.3	0
PF3D7_0805000	chr8	283066	284522	-	285000	MAL8P1.138	alpha%2Fbeta+hydrolase%2C+putative	1.3	18.6	20.3	51.5	71.5	28	10.7	20.3	31.3	253.5	0
PF3D7_0805100	chr8	286959	288620	+	285000	MAL8P1.137	conserved+Plasmodium+protein%2C+unknown+function	0	0	0	0	2.4	0	0	213.4	0	215.8	1
PF3D7_0805200	chr8	290902	291183	+	295000	23499234	conserved+Plasmodium+protein%2C+unknown+function	1290.9	401.3	115.7	130.5	534.2	2201.4	9509.1	854.7	7528.9	22566.7	0
PF3D7_0805300	chr8	293113	296871	-	295000	CAD51313.1	conserved+Plasmodium+protein%2C+unknown+function	4	0	0	2	18.6	13.6	0	347.7	0	385.9	0
PF3D7_0805900	chr8	324279	325655	-	325000	PF3D7_0805900	conserved+Plasmodium+protein%2C+unknown+function	0	0	0	0	0	2.1	0.3	98.4	0	100.8	1
PF3D7_0806000	chr8	326215	330004	-	325000	PF3D7_0806000	AAA+family+ATPase%2C+putative	16.1	23.4	41.1	33.9	29.3	12.5	0	35.6	44.3	236.2	0
PF3D7_0806100	chr8	330651	332678	+	335000	PF08_0116	conserved+Plasmodium+protein%2C+unknown+function	54.4	32.8	78.8	73.7	65.8	11.5	0	74.2	103.8	495	0
PF3D7_0806200	chr8	333379	337727	+	335000	296004953	conserved+Plasmodium+membrane+protein%2C+unknown+function	0	0	0	1.9	39.1	4.2	0	0	0	45.2	0
PF3D7_0806300	chr8	337902	343254	-	345000	CAX64098.1	ferlin+like+protein%2C+putative	12.3	4.4	15.5	109.2	186.3	223.2	19.8	185	471.1	1226.8	0
PF3D7_0806400	chr8	344288	344821	+	345000	23499227	glycosyltransferase+family+28+protein%2C+putative	2.4	0.4	9.4	34	74.6	29.1	0.2	8.9	12.7	171.7	0
PF3D7_0806500	chr8	345427	347454	-	345000	23499226	DnaJ+protein%2C+putative	198.3	175.9	225.2	208.9	244.2	318.2	47.3	201.6	1057.3	2676.9	0
PF3D7_0806600	chr8	349317	353362	-	355000	2655223	kinesin-like+protein%2C+putative	23.7	2.8	1.5	10.2	2	0	2.1	8.9	1.4	52.6	0
PF3D7_0806700	chr8	354472	362396	+	355000	PF08_0114	conserved+Plasmodium+membrane+protein%2C+unknown+function	318.7	164	359.5	347.3	268	74.4	20.5	212.4	78.2	1843	0
PF3D7_0806800	chr8	363260	366421	-	365000	PPM	vacuolar+proton+translocating+ATPase+subunit+A%2C+putative	108.2	64.3	83.1	79.4	73.5	60.8	96.4	39.6	167.9	773.2	0
PF3D7_0806900	chr8	368607	369746	-	365000	PF3D7_0806900	conserved+Plasmodium+protein%2C+unknown+function	2	0	2.9	20.4	3.9	28	0	18	0	75.2	0
PF3D7_0807000	chr8	370922	372623	+	375000	chrom_remod	gas41+homologue%2C+putative	118.6	111.9	186.1	139.7	105.7	60.4	32	98.6	46.7	899.7	0
PF3D7_0807100	chr8	372902	376867	-	375000	PF08_0111	RNA+helicase%2C+putative	131.3	94.2	147.1	75.7	93.7	46	14.1	114.9	15.6	732.6	0
PF3D7_0807200	chr8	378024	379446	+	375000	MAL8P1.130	conserved+Plasmodium+membrane+protein%2C+unknown+function	104.5	131.3	105.6	82.2	99.4	59.2	72	62.1	77.5	793.8	0
PF3D7_0807300	chr8	381564	382847	+	385000	23499218	Rab+GTPase+18+%28RAB18%29	46.6	46.3	59.4	86.1	78.7	37	27.1	11.9	44.3	437.4	0
PF3D7_0807500	chr8	387219	388364	+	385000	proteaUbiqpath	proteasome+subunit+alpha%2C+putative	175.9	242.2	512.1	568	459.5	260.2	2.6	167.5	53.7	2441.7	0
PF3D7_0807600	chr8	389596	394259	-	395000	PF3D7_0807600	conserved+Plasmodium+protein%2C+unknown+function	237.2	216.3	322.5	194.7	209.3	76.6	28	112.6	244.5	1641.7	0
PF3D7_0807700	chr8	395648	398787	-	395000	23499215	serine+protease%2C+putative	21.4	12.6	53.8	34.8	84.1	38	6.7	42.7	195.5	489.6	0
PF3D7_0807800	chr8	399591	401360	-	405000	CAD51294.1	proteasome+subunit+alpha+type+5%2C+putative	143.9	75.8	186.4	181.2	284.9	104.2	4.1	245.5	95.1	1321.1	0
PF3D7_0807900	chr8	402595	404141	+	405000	23499213	tyrosyl-tRNA+synthetase%2C+putative	160.1	147.2	303	293.7	333.4	116.3	36.9	134.3	259.2	1784.1	0
PF3D7_0808000	chr8	404996	409084	+	405000	11738814	conserved+Plasmodium+protein%2C+unknown+function	0	4.4	12.9	0	12.7	0	0	0	0	30	0
PF3D7_0808100	chr8	409936	415168	+	415000	CAX64106.1	conserved+Plasmodium+protein%2C+unknown+function	0	0	8.7	4.8	2.2	1.4	0	0	10	27.1	0
PF3D7_0808200	chr8	416344	418065	-	415000	AAW78323.1	plasmepsin+X	35.6	8.6	0	10.1	169.1	509.1	13.2	167.9	986.1	1899.7	0
PF3D7_0808300	chr8	421493	422640	+	425000	CAD51289.1	ubiquitin+regulatory+protein%2C+putative	137.8	48.2	45.1	76.6	82.4	70.5	54.8	126.4	125.6	767.4	0
PF3D7_0808400	chr8	423527	424536	+	425000	MAL8P1.121:exon:1	coatomer+epsilon+subunit%2C+putative	1.4	0	0	0	6.5	0	0	0.8	0	8.7	0
PF3D7_0808600	chr8	431165	439051	+	435000	PfEMP1	erythrocyte+membrane+protein+1%2C+PfEMP1+%28VAR%29	219.6	70.9	42.1	53.1	55.3	70.9	48	49.7	63.3	672.9	0
PF3D7_0808700	chr8	440408	448062	+	445000	CAD51286.1	erythrocyte+membrane+protein+1%2C+PfEMP1+%28VAR%29	50	28.5	22.4	17	26.6	30.7	27.4	67.8	56.6	327	0
PF3D7_0808800	chr8	450615	451899	+	455000	cytoadherencescheme	rifin+%28RIF%29	0	10.8	8.5	0	0	3.1	13.8	1.1	40	77.3	0
PF3D7_0808900	chr8	453803	454919	+	455000	PF08_0104	rifin+%28RIF%29	24.4	41.4	53.8	19.1	38	27.5	25.5	45.2	54.6	329.5	0
PF3D7_0809100	chr8	459312	466567	+	465000	CAD51283.1	erythrocyte+membrane+protein+1%2C+PfEMP1+%28VAR%29	163.4	96.9	47.7	54.9	59.6	53.7	16.3	44.6	39.8	576.9	0
PF3D7_0809200	chr8	467943	471893	-	465000	XP_001349433.2	asparagine-rich+antigen+Pfa55-14+%28pfa55-14%29	21.8	6.7	20.5	28.8	10.2	0	0	152.5	41.3	281.8	0
PF3D7_0809400	chr8	475573	478125	+	475000	2655300	conserved+Plasmodium+protein%2C+unknown+function	2.2	0	20.4	13.4	27.5	3.2	0	24.1	4.9	95.7	0
PF3D7_0809500	chr8	478512	478826	-	475000	PF3D7_0809500	conserved+Plasmodium+protein%2C+unknown+function	90	36.5	90.1	67.5	41.3	36	107	101.7	1.9	572	0
PF3D7_0809600	chr8	479980	497382	-	485000	2655237	peptidase+family+C50%2C+putative	0.7	42.7	157.3	135.2	129.8	36.8	4.1	100.2	34.5	641.3	0
PF3D7_0809700	chr8	499463	501569	-	505000	ExcisionRepairTab	RuvB+DNA+helicase%2C+putative	0	1.2	0.8	5.8	11.2	2.3	6.5	100.2	24	152	1
PF3D7_0809800	chr8	502338	506698	-	505000	2655236	conserved+Plasmodium+protein%2C+unknown+function	0	0.7	0	0	0	0	0	11.1	0	11.8	0
PF3D7_0809900	chr8	508224	512428	-	515000	JmjC1	JmjC+domain+containing+protein+%28JmjC1%29	77.1	44	84.3	121.9	151.1	70.6	42.7	93.6	23.8	709.1	0
PF3D7_0810000	chr8	517421	517693	-	515000	CAD51275.1	acyl-CoA+binding+protein%2C+putative	1	0	0.3	0	0	0	2.8	0	0	4.1	0
PF3D7_0810100	chr8	519331	519991	-	515000	XP_002808834.1	apicoplast+ribosomal+protein+L33+precursor%2C+putative	16.9	31.9	133.5	185.6	195.2	62.9	2	219.4	114.4	961.8	0
PF3D7_0810200	chr8	521187	524009	+	525000	peptideExport	ABC1+family%2C+putative+%28ABCK1%29	0	0	11.7	1.3	3.8	4.9	0	52.3	29.9	103.9	1
PF3D7_0810300	chr8	525058	527604	-	525000	Phos_tmd_exprs	protein+phosphatase%2C+putative	1.2	8.4	10.7	49.8	155.7	125.5	3.5	143.2	18	516	0
PF3D7_0810400	chr8	532220	534031	+	535000	XP_002808836.1	conserved+Plasmodium+membrane+protein%2C+unknown+function	57.5	103.1	180.9	152.5	121.2	50.7	8.7	733.2	40.6	1448.4	0
PF3D7_0810500	chr8	534469	536619	-	535000	23499190	protein+phosphatase%2C+putative	140.8	82.8	175.6	113.6	88.5	15.9	24.9	278.2	48.8	969.1	0
PF3D7_0810600	chr8	541971	544796	+	545000	CAD51269.1	RNA+helicase%2C+putative	166.3	61.5	208	118.2	82.2	20.1	22.2	297.6	222.8	1198.9	0
PF3D7_0810700	chr8	546163	547365	-	545000	C0H4T8	conserved+Plasmodium+protein%2C+unknown+function	7.3	2.5	16.7	9.2	6.6	0	0	13	0	55.3	0
PF3D7_0810800	chr8	548200	550616	+	545000	639670	dihydropteroate+synthetase+%28DHPS%29	22.7	17.4	79.9	45.7	37.7	4.1	0	5.6	9.6	222.7	0
PF3D7_0810900.1	chr8	551199	552428	-	555000	PF3D7_0810900.1	conserved+Plasmodium+protein%2C+unknown+function	2.3	10	44.8	48.6	110.5	68.5	12.9	109.6	4.8	412	0
PF3D7_0811000	chr8	554437	557205	+	555000	PF08_0094	cullin-like+protein%2C+putative	0	0	25.9	72.4	92.9	53.5	0	63.2	0	307.9	0
PF3D7_0811100	chr8	557884	559506	-	555000	transporters	mitochondrial+carrier+protein%2C+putative	15.5	7.5	24.5	36.2	109.9	34.2	5.7	16.9	0.1	250.5	0
PF3D7_0811200	chr8	560744	564276	+	565000	MAL8P1.105	conserved+protein%2C+unknown+function	47	11.9	54.2	29	38.7	6.2	0	4.6	0	191.6	0
PF3D7_0811300	chr8	567824	573148	+	575000	225632233	CCR4-associated+factor+1+%28CAF1%29	166.1	65.4	101.1	87.1	125	55	106.6	29.1	40.9	776.3	0
PF3D7_0811400	chr8	575986	578370	+	575000	2655221	conserved+Plasmodium+protein%2C+unknown+function	529.8	329.9	690.5	350.7	355.2	158.9	40.9	163.3	195.6	2814.8	0
PF3D7_0811500	chr8	579483	582221	+	585000	arginine	histone-arginine+methyltransferase%2C+putative+%28CARM1%29	16.8	11.3	26.1	28.8	5.9	0	5.6	0	0	94.5	0
PF3D7_0811600	chr8	582983	586953	-	585000	124512554	conserved+Plasmodium+protein%2C+unknown+function	9.6	8.7	9.4	16.1	87.3	27.2	4.8	8.7	11.4	183.2	0
PF3D7_0811700	chr8	589821	593489	+	595000	CAD51258.1	conserved+Plasmodium+protein%2C+unknown+function	0	0	0	0	0	0	0	0	0	0	0
PF3D7_0811800	chr8	593649	595412	-	595000	XP_001349408.1	conserved+Plasmodium+protein%2C+unknown+function	0	0	12.5	0	10.2	0	0	0	0	22.7	0
PF3D7_0811900	chr8	596190	600328	+	595000	2655243	RNA+binding+protein%2C+putative	1.8	15.6	88.8	96.1	140.6	83.1	3.6	153.3	8.8	591.7	0
PF3D7_0812000	chr8	600525	602247	-	605000	PF3D7_0812000	conserved+Plasmodium+protein%2C+unknown+function	10.9	0	23.6	7.2	4.5	9.3	5.5	32	0	93	0
PF3D7_0812100	chr8	604923	612878	+	605000	PF08_0089	conserved+Plasmodium+protein%2C+unknown+function	69.4	49.8	130.3	88.8	231.8	48.7	1.9	44.8	33.9	699.4	0
PF3D7_0812200	chr8	614919	617821	-	615000	PF3D7_0812200	trypsin-like+serine+protease%2C+putative	0	6.6	17.2	19.5	18.4	7.9	2	1.2	10.2	83	0
PF3D7_0812220	chr8	613325	614862	-	615000	MAL8P1.99	GTPase%2C+putative	0	0	8.8	4.9	54.5	0	0	0	3.7	71.9	0
PF3D7_0812300	chr8	618843	620228	-	615000	PF08_0088	conserved+Plasmodium+protein%2C+unknown+function	0	4.2	0	0	16.4	0	0	17.7	200	238.3	1
PF3D7_0812400	chr8	621805	623442	-	625000	PF3D7_0812400	karyopherin+alpha+%28KARalpha%29	350.8	416.8	816	790.4	688.1	242.4	88.6	215.5	231.8	3840.4	0
PF3D7_0812500	chr8	626069	628945	-	625000	Q8IAW1	RNA+binding+protein%2C+putative	119.1	35	56.8	61.5	36.4	8.7	13.1	53.3	1.1	385	0
PF3D7_0812600	chr8	631584	632229	-	635000	proteasome_new	ubiquitin+conjugating+enzyme%2C+putative	283.2	261.7	454.5	565.7	486	344.8	104.6	1423.3	541.8	4465.6	0
PF3D7_0812700	chr8	633990	634697	+	635000	74815005	RNA-binding+protein+%28U1+snRNP-like%29%2C+putative	31.1	23.4	53.6	36.3	45	8.3	8.5	37.9	13.4	257.5	0
PF3D7_0812900	chr8	636628	641458	-	635000	Q8IAW4	probable+protein%2C+unknown+function	1.4	0.6	11.6	0	5.1	0	30.4	40.5	67.8	157.4	0
PF3D7_0813000	chr8	643086	644885	-	645000	23499165	conserved+Plasmodium+protein%2C+unknown+function	44.6	17.1	14.4	10.6	19.3	15.6	129	17	17.9	285.5	0
PF3D7_0813100	chr8	647316	649304	-	645000	PF3D7_0813100	conserved+Plasmodium+protein%2C+unknown+function	0	0	10.2	32.7	108.3	91.1	11.3	83.6	252.8	590	0
PF3D7_0813200	chr8	651417	652804	-	655000	XP_001349394.1	CS+domain+protein%2C+putative	29.1	49.1	116.6	124.7	162.6	105.9	64.1	239.7	89.1	980.9	0
PF3D7_0813300	chr8	656078	657630	+	655000	MAL8P1.95	conserved+Plasmodium+protein%2C+unknown+function	968.2	1037.7	1683.5	640.2	317.9	304.9	1313.8	310.7	260.4	6837.3	0
PF3D7_0813400	chr8	658493	662095	-	665000	PF08_0081	conserved+Plasmodium+protein%2C+unknown+function	171.3	112.2	151.7	57.2	67.9	11.1	95.7	242.5	127	1036.6	0
PF3D7_0813500	chr8	665548	667095	-	665000	PF3D7_0813500	conserved+Plasmodium+protein%2C+unknown+function	0	9.6	41.2	29.8	31.7	0.4	0	244.4	44.7	401.8	0
PF3D7_0813600	chr8	669541	670734	+	675000	23499158	translation+initiation+factor+SUI1%2C+putative	104.2	68.7	101.2	47.8	37.1	12.6	3.8	71.1	29.4	475.9	0
PF3D7_0813700	chr8	671157	675416	-	675000	11738814	ABC+transporter%2C+putative	13.8	34.3	153.2	90.5	78.9	38.9	24.2	61.3	26.6	521.7	0
PF3D7_0813800	chr8	676391	677464	+	675000	2655276	GDP-mannose+4%2C6-dehydratase%2C+putative	3.9	0	0	0.6	8.9	0.1	0	376.2	10.1	399.8	1
PF3D7_0813900	chr8	677989	678725	-	675000	2655275	40S+ribosomal+protein+S16%2C+putative	536.9	390.9	494.5	279.9	278.9	52.5	90.4	103.2	16	2243.2	0
PF3D7_0814000	chr8	680957	681809	+	685000	Q8IAX6	60S+ribosomal+protein+L13-2%2C+putative	1157.9	684.4	1248.6	727.4	562.9	328.1	759.3	238.5	40	5747.1	0
PF3D7_0814100	chr8	682518	683572	-	685000	2655444	conserved+Plasmodium+protein%2C+unknown+function	0	0	0	0	0	0	0.4	0	0	0.4	0
PF3D7_0814200	chr8	687340	688086	+	685000	2655273	DNA%2FRNA-binding+protein+Alba+1+%28ALBA1%29	3598.8	1563.6	3383.1	2565	1958.1	924	2051.1	1227.7	2565.2	19836.6	0
PF3D7_0814300	chr8	690541	694143	-	695000	MAL8P1.92	ATPase%2C+putative	99.3	73.1	90.7	62.8	43.7	20	34	44.1	26.4	494.1	0
PF3D7_0814400	chr8	695215	697522	-	695000	124512496	phospholipase+DDHD1%2C+putative	6.2	0	0.6	30.2	59.4	68.3	197.4	92.6	261.5	716.2	0
PF3D7_0814500	chr8	700376	702652	+	705000	23499148	conserved+Plasmodium+protein%2C+unknown+function	59.9	21.7	3.7	6.6	6.2	35.1	309.5	21.9	7.4	472	0
PF3D7_0814600	chr8	703502	704683	-	705000	PF08_0073	conserved+Plasmodium+protein%2C+unknown+function	14.3	20.1	10.2	24.7	18.8	40.4	105.2	142.4	113.8	489.9	1
PF3D7_0814700	chr8	706076	706996	+	705000	PF08_0072	conserved+Plasmodium+protein%2C+unknown+function	28.1	21.4	0	0	0.5	17.4	72.3	91.9	115.7	347.3	1
PF3D7_0814900	chr8	708228	708824	+	705000	AAD03754.1	Fe-superoxide+dismutase+%28FeSOD%29	215.8	197.1	423	549	369.1	210.4	9.2	280.6	324.7	2578.9	0
PF3D7_0815000	chr8	709333	710600	-	705000	MAL8P1.86	unspecified+product+%28Sel3%29	0	20	53.4	26.5	40.4	2.4	0	24.7	0	167.4	0
PF3D7_0815100	chr8	711239	714166	+	715000	PF3D7_0815100	RAP+protein%2C+putative	0	9.7	4.7	0	7.5	0	0	10.5	23.9	56.3	0
PF3D7_0815200	chr8	717113	719746	+	715000	PF3D7_0815200	importin+beta%2C+putative	3.7	0	8.9	19.8	6.8	0	0	10.4	8.9	58.5	0
PF3D7_0815300	chr8	721928	725476	+	725000	XP_001349371.1	FAD-dependent+monooxygenase%2C+putative	2.8	15.2	78.7	87.5	74.3	25.6	15.7	195.8	47.2	542.8	0
PF3D7_0815400	chr8	725781	726502	-	725000	Q8IAZ1	conserved+Plasmodium+protein%2C+unknown+function	0	15.2	63.6	105.4	99.7	45.4	18.2	116.7	23.4	487.6	0
PF3D7_0815500	chr8	727662	729728	+	725000	2655435	conserved+Plasmodium+protein%2C+unknown+function	0	0	8	71.1	128.2	33.1	0	2.6	2.5	245.5	0
PF3D7_0815600	chr8	729917	732187	-	735000	MAL8P1.83	eukaryotic+translation+initiation+factor%2C+putative	50.3	14.6	45.3	54.4	27.4	10.8	12.3	21.7	6	242.8	0
PF3D7_0815700	chr8	733279	734573	-	735000	apicoplastgene	ubiquitin+%28Ub%29	0	0	0	10.1	0.9	0	0	3	0	14	0
PF3D7_0815800	chr8	735680	741181	-	735000	PF3D7_0815800	vacuolar+sorting+protein+VPS9%2C+putative	5.2	18	14.3	6.2	28.2	11.3	0.6	30.4	67.2	181.4	0
PF3D7_0815900	chr8	743505	745505	+	745000	XP_001349365.1	lipoamide+dehydrogenase+%28aLipDH%29	2	0.8	0.3	19.2	24.4	6.1	0	138.9	5.4	197.1	0
PF3D7_0816000	chr8	746013	747488	-	745000	23499133	nucleolar+preribosomal+assembly+protein%2C+putative	83.2	45	78	25.5	12.7	1.1	18.8	34	9.1	307.4	0
PF3D7_0816100	chr8	748653	749623	+	745000	Q8IAZ8	flavoprotein%2C+putative	106.2	38.8	13.1	27.8	95.5	85.7	61.8	31.7	9.3	469.9	0
PF3D7_0816200	chr8	750082	750711	-	755000	XP_001349362.1	vacuolar+protein-sorting+protein+VPS2%2C+putative	0.8	0	0	15.3	44.6	1.9	0	146.8	74.3	283.7	0
PF3D7_0816300	chr8	751942	756173	-	755000	225632243	conserved+Plasmodium+protein%2C+unknown+function	33.9	11.8	32.7	25.7	21.5	14.3	13.9	50.4	7.7	211.9	0
PF3D7_0816400	chr8	757224	758207	+	755000	MAL8P1.79	conserved+Plasmodium+protein%2C+unknown+function	8	20.2	82.8	100	139.5	87.7	37.3	333.7	196.9	1006.1	0
PF3D7_0816500	chr8	760138	761031	+	765000	12368867	small+heat+shock+protein+HSP20%2C+putative%3Bwith%3DGeneDB%3APBANKA_071430	1.3	0.1	11.6	0	10.5	11.1	20.6	791.9	48.3	895.4	1
PF3D7_0816600	chr8	762118	765330	-	765000	11738814	ClpB+protein%2C+putative+%28ClpB1%29	7	44.1	250.1	141.4	121.3	25.6	4.3	84.6	54.8	733.2	0
PF3D7_0816700	chr8	767110	767880	+	765000	MAL8P1.77	conserved+Plasmodium+protein%2C+unknown+function	12.2	19.8	71.7	57.2	55.7	45.3	25.5	132.6	0	420	0
PF3D7_0816800	chr8	767916	769792	-	765000	AAK43698.1	meiotic+recombination+protein+dmc1-like+protein	12.2	34.5	37.7	40.9	44	34.5	45.2	3431.9	136.1	3817	1
PF3D7_0816900	chr8	770946	771773	+	775000	124512444	adenylate+kinase+2+%28AK2%29	0	0	0	0	0	0	0	0	0	0	0
PF3D7_0817000	chr8	772568	773737	+	775000	CAX64128.1	ubiquitin-activating+enzyme%2C+putative	2.5	5.4	32.4	8.3	7	0	0	13	0	68.6	0
PF3D7_0817200	chr8	777257	779647	-	775000	23499122	conserved+Plasmodium+protein%2C+unknown+function	45.6	27.8	70.9	57.3	96.2	49.8	34.3	51.2	230.4	663.5	0
PF3D7_0817300	chr8	782909	789616	-	785000	23499121	asparagine-rich+antigen	257.8	693.1	964.9	634.5	724.9	233	1.1	259.5	375	4143.8	0
PF3D7_0817400	chr8	794287	797806	-	795000	2655424	conserved+Plasmodium+protein%2C+unknown+function	0	21.5	80.4	42.3	52.9	29.1	0	42.1	1.6	269.9	0
PF3D7_0817500	chr8	798777	800205	+	795000	PF3D7_0817500	protein+kinase+c+inhibitor-like+protein%2C+putative	500.3	701.7	827.5	788.3	782.1	323.6	33.7	1572.3	76.4	5605.9	0
PF3D7_0817600	chr8	800920	804034	-	805000	124512432	conserved+Plasmodium+protein%2C+unknown+function	0	1.8	1.5	25.4	95	43.2	0	102.8	10.2	279.9	0
PF3D7_0817700	chr8	805797	813465	-	805000	11738814	rhoptry+neck+protein+5+%28RON5%29	9	22.4	41	45.6	374.5	362.2	10.5	111.9	18.6	995.7	0
PF3D7_0817800	chr8	815150	815451	+	815000	PF08_0057	conserved+Plasmodium+protein%2C+unknown+function	1599.2	1247.8	1583.5	2172	2370.4	2192.2	2232.8	2151	3333.2	18882.1	0
PF3D7_0817900	chr8	816803	817102	-	815000	CAD51195.1	high+mobility+group+protein+%28HMGB2%29	292.9	400.7	582.2	886.8	1134.8	509.3	782.2	5133.3	332.1	10054.3	1
PF3D7_0818000	chr8	821334	822452	+	825000	MAL8P1.71	conserved+Plasmodium+protein%2C+unknown+function	41.2	18.6	70.1	46.4	47.3	22.1	47.4	110.5	109.5	513.1	0
PF3D7_0818100	chr8	824564	826518	+	825000	Q8IB16	zinc+finger+protein%2C+putative	55.6	0	14.3	22.9	200	501	21.1	51.3	528.3	1394.5	0
PF3D7_0818200	chr8	830006	831454	+	835000	14-3-3prot	14-3-3+protein%2C+putative	1273.8	1162.7	1906.4	2484.9	2010.1	1303.2	2694.6	512.8	1135.5	14484	0
PF3D7_0818300	chr8	833185	835334	+	835000	MAL8P1.68	conserved+Plasmodium+protein%2C+unknown+function	0	0	0	2.8	1.2	0	15.8	40.8	4.7	65.3	0
PF3D7_0818400	chr8	835978	836848	-	835000	MAL8P1.67	nucleolar+preribosomal+assembly+protein%2C+putative+%28UTP24%29	281.4	251.4	376.2	222.5	118.1	44.6	126.8	653.7	161.7	2236.4	0
PF3D7_0818500	chr8	842317	843215	+	845000	124512414	zinc+finger+protein%2C+putative	435.9	169.2	307	142.5	359.5	464.1	763.3	376	197.2	3214.7	0
PF3D7_0818600	chr8	845253	847380	-	845000	2655392	conserved+Plasmodium+protein%2C+unknown+function	18.9	0	31.9	36.4	65	105.5	67.2	542.7	1302.6	2170.2	0
PF3D7_0818700	chr8	848277	852947	-	855000	MAL8P1.65	DNA+helicase%2C+putative	31	4.5	20.9	15.1	13.7	2	0	9.7	4.3	101.2	0
PF3D7_0818800	chr8	855654	856742	-	855000	2655255	U3+small+nucleolar+ribonucleoprotein+protein%2C+putative	37.2	30.6	28.9	21.8	18.1	17.1	77	44.4	42	317.1	0
PF3D7_0818900	chr8	860384	862417	+	865000	chaperone	heat+shock+protein+70+%28Hsp70%29	4765.4	5519.4	9077.1	7614	7015.3	4626	8307.6	1935.9	8684.4	57545.1	0
PF3D7_0819000	chr8	863505	868137	-	865000	PF3D7_0819000	conserved+Plasmodium+protein%2C+unknown+function	66.6	49.6	57.4	39.6	34.7	32.3	23.4	36	65.4	405	0
PF3D7_0819100	chr8	869562	870574	+	875000	Ribosomegenes	BRIX+domain%2C+putative	37.5	26.9	29.9	26.1	28.9	15.8	25.5	39.5	11.1	241.2	0
PF3D7_0819200	chr8	871410	873440	+	875000	XP_001349333.1	perforin+like+protein+5+%28PPLP5%29	3.7	0	0	6	0	0	8.4	0	19.1	37.2	0
PF3D7_0819300	chr8	874367	877498	+	875000	PF08_0051	conserved+Plasmodium+protein%2C+unknown+function	0	4.1	44.9	44.9	27.2	0	0	0	18	139.1	0
PF3D7_0819400	chr8	878495	880459	+	875000	PF08_0050	perforin+like+protein+4+%28PPLP4%29	0	0	5	6.2	0	9.7	9.7	14.5	32.8	77.9	0
PF3D7_0819500	chr8	881590	884390	+	885000	PF3D7_0819500	conserved+protein%2C+unknown+function	9.9	37.7	84.6	13.6	6.8	0	0	71.4	5.8	229.8	0
PF3D7_0819600	chr8	885198	886136	-	885000	124512392	conserved+Plasmodium+protein%2C+unknown+function	37.8	91	208.3	184.8	337.4	328.5	3.1	1373.4	53.5	2617.8	0
PF3D7_0819700	chr8	888126	890471	-	885000	PF3D7_0819700	conserved+Plasmodium+protein%2C+unknown+function	18.6	14	57.1	83.8	172.5	71.7	8.1	96	20.8	542.6	0
PF3D7_0819800	chr8	891658	898502	-	895000	splicing	conserved+Plasmodium+protein%2C+unknown+function	0	0	2.5	3.8	8.2	0	0	21.8	7.7	44	0
PF3D7_0820000	chr8	900742	907714	-	905000	PF08_0048	Snf2-related+CBP+activator%2C+putative+%28SRCAP%29	263.7	298.4	509.2	295.7	228.6	67.8	24.3	118.5	27.8	1834	0
PF3D7_0820100	chr8	909207	910716	-	905000	11738814	conserved+Plasmodium+protein%2C+unknown+function	0	0	0	0	0	0	0	0	0	0	0
PF3D7_0820200	chr8	912264	914249	-	915000	124512380	phosphatidylglycerophosphate+synthase+%28PGPS%29	133.7	129.2	231.4	202.4	263	128.2	19.1	88.3	16.4	1211.7	0
PF3D7_0820300	chr8	919055	920896	+	915000	CAD51171.1	conserved+Plasmodium+protein%2C+unknown+function	164.3	36.9	84	47.6	139.7	83.4	208.1	56.9	145.8	966.7	0
PF3D7_0820400	chr8	922208	923932	+	925000	PF08_0046	conserved+Plasmodium+protein%2C+unknown+function	0	0	18.8	12.4	10.1	0	5.8	49.5	4.2	100.8	0
PF3D7_0820500	chr8	925113	927671	+	925000	2655339	C-13+antigen	51.4	80.7	40.8	31.3	52.7	42.6	54.4	16.8	59	429.7	0
PF3D7_0820600	chr8	929145	930861	+	935000	23499088	conserved+Plasmodium+membrane+protein%2C+unknown+function	1.7	4.9	4.9	25.8	34.9	35.4	3.7	47.4	77.8	236.5	0
PF3D7_0820700	chr8	932321	935626	+	935000	2655496	2-oxoglutarate+dehydrogenase+E1+component	0.3	8.2	42.2	86.8	91.7	17	0	51.2	141.1	438.5	0
PF3D7_0820800	chr8	936426	938876	-	935000	CAD51166.1	conserved+Plasmodium+protein%2C+unknown+function	0	0	5	7.8	3.8	0	2.7	12	14.2	45.5	0
PF3D7_0820900	chr8	939583	944645	-	945000	CAD51165.1	conserved+Plasmodium+protein%2C+unknown+function	15.6	2	5.9	10.5	19.6	15.6	0	11.9	19.1	100.2	0
PF3D7_0821100	chr8	953448	956314	+	955000	PK1	protein+kinase+1+%28PK1%29	15.9	0	7.6	11.6	9.6	0.8	29.6	3.9	5.9	84.9	0
PF3D7_0821200	chr8	957498	958073	+	955000	PF3D7_0821200	conserved+Plasmodium+protein%2C+unknown+function	22.4	4.5	23.8	5.5	33.4	0	11.2	7.4	40.4	148.6	0
PF3D7_0821300	chr8	958531	961740	-	965000	CAD51161.1	ATP-dependent+RNA+helicase+prh1%2C+putative	8.3	16.3	8.9	19.4	6.6	4.3	18.8	35.2	30.4	148.2	0
PF3D7_0821400	chr8	965822	966657	+	965000	23499080	conserved+Plasmodium+protein%2C+unknown+function	199.1	165.2	176.7	232.2	392.9	493.2	1467.9	254.6	153.8	3535.6	0
PF3D7_0821600	chr8	969690	971714	+	975000	2655491	clp1-related+protein%2C+putative	48.2	31.3	53.6	32.8	27.7	34.1	41.4	46.3	28.6	344	0
PF3D7_0821700	chr8	973586	974267	+	975000	XP_001349308.1	60S+ribosomal+protein+L22%2C+putative	724.1	534.2	1067.4	562.8	412	251.6	277.4	341.2	192.1	4362.8	0
PF3D7_0821800	chr8	976074	976644	+	975000	MAL8P1.51	secretory+complex+protein+61+beta+subunit+%28Sec61-beta%29	503.4	688.8	732.3	897.5	932	403.5	169.9	1429.7	317.9	6075	0
PF3D7_0821900	chr8	977432	978188	-	975000	CAX64145.1	conserved+Plasmodium+protein%2C+unknown+function	0.7	14.6	116.9	102.3	74.3	15.4	13.3	46.2	32.4	416.1	0
PF3D7_0822000	chr8	978798	980634	+	975000	PF08_0038	mitochondrial+ribosomal+protein+L4+precursor%2C+putative	4.1	0	21.7	34.7	24.3	7.2	0	52.3	11.3	155.6	0
PF3D7_0822100	chr8	981018	981722	-	985000	XP_001349304.1	RNA+polymerase+II+mediator+complex+protein+MED7%2C+putative	61.7	26.1	72.3	28.8	6.1	3	0	26.2	0	224.2	0
PF3D7_0822200	chr8	982570	987696	+	985000	MAL8P1.49	conserved+Plasmodium+membrane+protein%2C+unknown+function	27.1	8.6	23.7	24.8	26.1	0	2.7	13.5	0	126.5	0
PF3D7_0822300	chr8	988281	988763	-	985000	Ribosomegenes	small+nuclear+ribonucleoprotein+G%2C+putative+%28SNRPG%29	31.5	11.5	33	31.5	9.4	4.9	29.3	37.9	96.6	285.6	0
PF3D7_0822400	chr8	990250	992191	+	995000	XP_002808869.1	conserved+Plasmodium+protein%2C+unknown+function	0	0	0	0	0	0	0	0.4	0	0.4	0
PF3D7_0822500	chr8	992655	993965	-	995000	XP_001349300.1	dynein+light+chain+1+%28DLC1%29	0.2	0	0	0	0	0	18.9	39.7	12.4	71.2	0
PF3D7_0822600	chr8	997055	999529	+	995000	2655487	protein+transport+protein+Sec23+%28SEC23%29	287.2	103.1	186.4	250.1	418.7	234.9	231.9	183.8	29.3	1925.4	0
PF3D7_0822700	chr8	1000981	1003755	-	1005000	splicing	conserved+Plasmodium+protein%2C+unknown+function	4.3	0	61.5	73	54.9	3	6.2	15.6	140.7	359.2	1
PF3D7_0822800	chr8	1005836	1006810	+	1005000	C0H4X1	U5+snrnp-specific+protein%2C+putative	150.8	142.7	234.7	216.1	164.8	76.4	58.5	119.1	168.8	1331.9	0
PF3D7_0822900	chr8	1007777	1011307	-	1005000	124512324	conserved+Plasmodium+protein%2C+unknown+function	6.8	0	8.9	1.2	136.9	202.1	3.9	14.6	0	374.4	0
PF3D7_0823000	chr8	1012927	1017376	-	1015000	23499063	protein+kinase+%2C+putative	17.2	5.7	38.6	3.9	23.7	14.2	5	39.8	16.1	164.2	0
PF3D7_0823100	chr8	1018089	1019268	-	1015000	MAL8P1.41	RWD+domain-containing+protein%2C+putative	0	0	0	0	1.2	0	4.6	0	0	5.8	0
PF3D7_0823200	chr8	1022629	1023846	-	1025000	124512318	RNA+binding+protein%2C+putative	2322.7	1622.2	2264	1603.1	1083.3	923.9	3338.5	579.3	715.1	14452.1	0
PF3D7_0823300	chr8	1028752	1033514	+	1035000	chromatin	histone+acetyltransferase+GCN5+%28GCN5%29	55.7	52.2	107.1	101.4	100.2	32.4	28.5	28	37.2	542.7	0
PF3D7_0823400	chr8	1034417	1036428	+	1035000	CAX64151.1	alpha%2Fbeta-hydrolase%2C+putative	0	0	0	0	0.4	0	0	13.3	0	13.7	0
PF3D7_0823500	chr8	1037100	1038608	-	1035000	Q8IB69	membrane+skeletal+protein+IMC1-related	0	0	0	0	0	0	0	100.3	43.8	144.1	1
PF3D7_0823600	chr8	1039907	1041211	-	1045000	BiosynthFeS	lipoate-protein+ligase	0	0	0	0	0	0	0	0	0	0	0
PF3D7_0823700	chr8	1041832	1042327	-	1045000	CAD51136.1	conserved+Plasmodium+protein%2C+unknown+function	39	17.7	90.6	26.7	17.3	0.7	0	21.3	3.6	216.9	0
PF3D7_0823800	chr8	1043813	1045780	+	1045000	PF08_0032	DnaJ+protein%2C+putative	42.5	20.9	57.4	50.2	73.5	37	0	0	0	281.5	0
PF3D7_0823900	chr8	1047551	1048507	+	1045000	antioxidantSystem	dicarboxylate%2Ftricarboxylate+carrier+%28DTC%29	39.2	68.3	243.7	204.4	150.2	69.6	13.2	112.9	40	941.5	0
PF3D7_0824000	chr8	1049282	1051705	-	1055000	XP_001349284.1	conserved+Plasmodium+protein%2C+unknown+function	0	0	2.2	4.2	1.1	0	0	21.9	14.1	43.5	1
PF3D7_0824100	chr8	1052771	1053991	+	1055000	PF3D7_0824100	exonuclease%2C+putative	0	17	54.9	36.4	36	19.4	2.8	21.9	38.8	227.2	0
PF3D7_0824200	chr8	1055135	1059003	+	1055000	2655375	conserved+Plasmodium+protein%2C+unknown+function	3.6	27.3	108.9	86.2	80.1	27.1	0.3	56.4	24.7	414.6	0
PF3D7_0824300	chr8	1059246	1061567	-	1065000	2655416	GTP+binding+protein%2C+putative	0	3.7	34.9	26.1	52	36.6	3.4	41.8	0	198.5	0
PF3D7_0824400	chr8	1062304	1064061	-	1065000	Q8IB78	nucleoside+transporter+2+%28NT2%29	52.9	295.1	870.2	441.8	337.9	75.5	4	45.9	19.6	2142.9	0
PF3D7_0824600	chr8	1068563	1069902	+	1065000	XP_002808875.1	anamorsin+related+protein%2C+putative	59.5	24.6	59.9	35.2	33.7	6	27.6	152.3	57.5	456.3	0
PF3D7_0824700	chr8	1070988	1074417	+	1075000	MAL8P1.30	conserved+Plasmodium+membrane+protein%2C+unknown+function	22.8	35.3	44.8	79.3	94.9	33.3	47.7	89.3	76	523.4	0
PF3D7_0824800	chr8	1075800	1079630	+	1075000	PF3D7_0824800	conserved+Plasmodium+membrane+protein%2C+unknown+function	186.3	124.3	205.2	169.6	203.2	69.9	13.3	210.8	163.4	1346	0
PF3D7_0824900	chr8	1080055	1082991	-	1085000	PF08_0027	conserved+Plasmodium+protein%2C+unknown+function	41.2	0	41.5	41.6	10.3	0	0	9.7	6.5	150.8	0
PF3D7_0825000	chr8	1086048	1091248	+	1085000	296005082	conserved+Plasmodium+protein%2C+unknown+function	0	0	15.6	15.2	30.6	7.5	0	285.7	36.7	391.3	0
PF3D7_0825100	chr8	1091998	1093221	+	1095000	Q8IB85	conserved+Plasmodium+protein%2C+unknown+function	0	0	0	0	0	2.7	0	107	0	109.7	0
PF3D7_0825200	chr8	1093690	1094489	+	1095000	XP_001349272.1	translation+initiation+factor+IF-3%2C+putative	0	2.7	63.1	101	110	70.2	14.5	106	1.8	469.3	0
PF3D7_0825300	chr8	1095116	1095562	-	1095000	11738814	conserved+protein%2C+unknown+function	26.1	51.3	87.8	140.4	77.7	70.3	11.9	1095.9	287.2	1848.6	1
PF3D7_0825500	chr8	1098484	1100376	+	1095000	PF08_0026	conserved+protein%2C+unknown+function	80.3	18.7	59.8	29.8	77.9	27.5	34.3	69.4	244.2	641.9	0
PF3D7_0825600	chr8	1100816	1101073	-	1105000	PF3D7_0825600	cytochrome+c+oxidase+assembly+protein%2C+putative	44.8	51.8	145.5	209.7	141.3	61	38.4	395.3	44.4	1132.2	0
PF3D7_0825700	chr8	1101887	1102804	-	1105000	2655474	conserved+Plasmodium+protein%2C+unknown+function	2.1	0	0	0	0	0	4.8	123.7	1.3	131.9	1
PF3D7_0825800	chr8	1103768	1105108	+	1105000	PF3D7_0825800	conserved+Plasmodium+protein%2C+unknown+function	0	0	3.7	0.6	0.4	0	2	402.4	6.8	415.9	1
PF3D7_0825900	chr8	1106048	1107961	+	1105000	2655473	conserved+Plasmodium+protein%2C+unknown+function	0	0	1.5	0	0.4	0	0	83.4	0	85.3	1
PF3D7_0826000	chr8	1109276	1112794	+	1115000	CAD51114.1	conserved+Plasmodium+protein%2C+unknown+function	0	3.4	10	14.9	0	0	0	3.2	0	31.5	0
PF3D7_0826100	chr8	1113369	1139144	-	1125000	proteasome_new	E3+ubiquitin-protein+ligase%2C+putative	109.4	84.6	192.6	82.5	88.3	5.2	0	68.5	92.4	723.5	0
PF3D7_0826200	chr8	1142499	1144307	-	1145000	proteases	conserved+Plasmodium+protein%2C+unknown+function	0	1.2	0	9.1	7.9	14.8	10.9	7.4	3.1	54.4	0
PF3D7_0826300	chr8	1146167	1147504	+	1145000	PF08_0021	SPRY+domain%2C+putative	0	13.2	79.3	106.8	118.9	45.6	0	94.7	20.6	479.1	0
PF3D7_0826400	chr8	1148010	1149830	-	1145000	XP_001349261.2	dehydrodolichyl+diphosphate+synthetase%2C+putative	0	9.5	4.6	5.4	25.7	5.1	0	4.4	0	54.7	0
PF3D7_0826500	chr8	1152302	1156282	+	1155000	PF08_0020	ubiquitination-mediated+degradation+component%2C+putative	136.3	68.5	223.7	182.2	203	104.6	11.3	264.3	246.5	1440.4	0
PF3D7_0826600	chr8	1157321	1158151	-	1155000	MAL8P1.21	SNARE+protein%2C+putative+%28VAMP7%29	8.5	12.7	40.2	3	19.5	3.7	0	33.3	0	120.9	0
PF3D7_0826700	chr8	1160164	1161708	-	1165000	redoxReg	receptor+for+activated+c+kinase+%28RACK%29	3899.7	3212.6	4965.2	4185.2	2457.4	1415.1	1376.8	497.7	858.2	22867.9	0
PF3D7_0826900	chr8	1164655	1167205	+	1165000	MAL8P1.20	conserved+Plasmodium+protein%2C+unknown+function	0	0	10.4	34	45.6	0.9	0	52	1.3	144.2	0
PF3D7_0827000	chr8	1167579	1171448	-	1165000	riboMaturation	ATP-dependent+RNA+helicase+DBP10%2C+putative+%28DBP10%29	205.2	165.9	191.3	116.6	76.6	38	18.6	75	173.2	1060.4	0
PF3D7_0827100	chr8	1172394	1176587	+	1175000	PF08_0018	translation+initiation+factor+IF-2%2C+putative	15.2	28.7	70	39.5	55.9	28	0.3	32.5	26.2	296.3	0
PF3D7_0827200	chr8	1177310	1180324	+	1175000	PF08_0017	conserved+Plasmodium+protein%2C+unknown+function	0	0	0	0	0	0	0	1492.7	0	1492.7	1
PF3D7_0827300	chr8	1181295	1183796	+	1185000	Q8IBA5	conserved+Plasmodium+protein%2C+unknown+function	11.2	1.3	5.5	0	9	7.5	1.6	2	0	38.1	0
PF3D7_0827400	chr8	1184595	1185251	+	1185000	Q8IBA6	conserved+Plasmodium+protein%2C+unknown+function	12.8	4.6	17.3	6.9	17.8	1.5	14.2	2905.7	38.5	3019.3	1
PF3D7_0827500	chr8	1186175	1187125	+	1185000	PF08_0014	apicoplast+ribosomal+protein+L21+precursor%2C+putative	5.4	11.1	65.5	51.6	69.2	36	14.1	257.2	14.2	524.3	0
PF3D7_0827600	chr8	1187623	1192925	-	1195000	MAL8P1.18	conserved+Plasmodium+protein%2C+unknown+function	0	11.2	66.2	95.4	61.1	31.1	13.5	72	7.4	357.9	0
PF3D7_0827700	chr8	1193847	1196678	-	1195000	CAD51098.1	conserved+Plasmodium+membrane+protein%2C+unknown+function	0	0	0	0	0	0	0	20.9	0	20.9	0
PF3D7_0827800	chr8	1198858	1206057	+	1205000	CAD51097.1	SET+domain+protein%2C+putative+%28SET3%29	9.4	3	3.4	8.6	21.3	0.5	11.8	37.4	20.6	116	0
PF3D7_0827900	chr8	1206788	1208394	-	1205000	296005096	protein+disulfide+isomerase+%28PDI8%29	2156.1	1592.8	3056.7	3400.1	3113.3	1805.2	237.7	1170.6	2385.4	18917.9	0
PF3D7_0828000	chr8	1210692	1211860	+	1215000	296005098	rhomboid+protease+ROM3+%28ROM3%29	35.1	12.2	36.6	47.6	49	11.5	23.4	5155.8	82.3	5453.5	1
PF3D7_0828100	chr8	1212337	1215579	-	1215000	Q8IBB2	conserved+Plasmodium+protein%2C+unknown+function	0	33.6	63.9	49.1	54.5	1.4	0	76.4	12.6	291.5	0
PF3D7_0828200	chr8	1216271	1220716	+	1215000	PF08_0011	leucine-tRNA+ligase%2C+putative	14.4	36.2	103.3	89.6	62	3.1	0	85.4	371.6	765.6	0
PF3D7_0828300	chr8	1221025	1222683	-	1225000	Q8IBB4	conserved+Plasmodium+protein%2C+unknown+function	8.3	16.2	61.6	56.5	82.2	33.4	0	9	9.7	276.9	0
PF3D7_0828400	chr8	1224094	1225863	-	1225000	23499011	mitochondrial+inner+membrane+protein%2C+putative+%28Oxa1%29	0	30.6	100.1	120.8	84.1	58.8	15.2	25.1	87.9	522.6	0
PF3D7_0828500	chr8	1226750	1228409	-	1225000	PF08_0009	translation+initiation+factor+EIF-2b+alpha+subunit%2C+putative	0	0.8	37.7	64.8	52.8	39	2.6	156.2	27.2	381.1	0
PF3D7_0828600	chr8	1229899	1232132	-	1235000	124512214	folate+transporter+1+%28FT1%29	0	0	1.3	18.8	113.4	144.7	7.1	231.7	43.7	560.7	0
PF3D7_0828700	chr8	1233372	1236473	+	1235000	23499008	conserved+Plasmodium+protein%2C+unknown+function	0	0	0	15.6	31.1	5.4	0	302.1	5.1	359.3	1
PF3D7_0828800	chr8	1237285	1239501	-	1235000	124512210	GPI-anchored+micronemal+antigen+%28GAMA%29	6.6	3.4	8.7	0	60.9	66.5	1.1	16.3	259.8	423.3	0
PF3D7_0828900	chr8	1241966	1242895	-	1245000	Pfal005255AAA	conserved+Plasmodium+protein%2C+unknown+function	8.5	12.2	0	18.6	39.5	46.5	1	9.9	111.3	247.5	0
PF3D7_0829000	chr8	1245211	1251078	+	1245000	MAL8P1.11	conserved+Plasmodium+membrane+protein%2C+unknown+function	30.9	22.1	75.3	77.8	71.3	43.5	6.5	58.9	50.1	436.4	0
PF3D7_0829100	chr8	1252349	1253796	+	1255000	XP_002808885.1	conserved+protein%2C+unknown+function	4.1	0.5	12.6	23.2	0	8.9	0	10.6	63.7	123.6	0
PF3D7_0829200	chr8	1254558	1255376	+	1255000	CAD51083.1	prohibitin%2C+putative	50.4	215.6	518.4	245.4	112.9	27.4	0.2	651.2	98.6	1920.1	0
PF3D7_0829300	chr8	1256555	1257133	+	1255000	MAL8P1.9	U6+snRNA-associated+Sm-like+protein+LSm8%2C+putative+%28LSM8%29	175.8	148	299.1	192.4	173.2	85.4	20.8	399.4	98.4	1592.5	0
PF3D7_0829400	chr8	1257716	1259041	-	1255000	225632286	prolyl+4-hydroxylase+alpha+subunit+1%2C+putative	3.7	19	12.9	75.9	94.8	66.7	16.3	44.3	328.4	662	0
PF3D7_0829500	chr8	1260048	1266698	-	1265000	2655419	conserved+Plasmodium+protein%2C+unknown+function	0	0	0	0	0	0	0	1.8	37.3	39.1	1
PF3D7_0829600	chr8	1269135	1269647	+	1265000	296005108	early+transcribed+membrane+protein+8+%28ETRAMP8%29	20.2	5.2	12.9	15.4	27.7	41.6	20.7	272.9	1821.5	2238.1	1
PF3D7_0830300	chr8	1290240	1291406	-	1295000	2655454	conserved+Plasmodium+protein%2C+unknown+function	0	0	0	9	0.4	0	16.6	2.6	177.6	206.2	1
PF3D7_0830400	chr8	1294022	1294722	+	1295000	PF08_0004	conserved+Plasmodium+protein%2C+unknown+function	1508.6	1142.2	1470.7	1081.1	787.4	756.4	2934.6	1514.2	126.2	11321.4	0
PF3D7_0830500	chr8	1296134	1298328	-	1295000	CAD51075.1	tryptophan%2Fthreonine-rich+antigen+%28TryThrA%29	27.3	0	0	0	0	2.8	43.3	0	0	73.4	0
PF3D7_0830600	chr8	1303323	1304813	+	1305000	CAD51074.1	Plasmodium+exported+protein+%28PHISTc%29%2C+unknown+function	123.7	14.1	8.8	0	0	6	87.7	0	0	240.3	0
PF3D7_0830700	chr8	1307053	1307924	+	1305000	MAL8P1.3	Plasmodium+exported+protein+%28hyp9%29%2C+unknown+function	208.6	426.4	592.9	449.3	149.3	90	94.8	53	41.8	2106.1	0
PF3D7_0830800	chr8	1310637	1316955	+	1315000	PF08_0002	surface-associated+interspersed+gene+8.2+%28SURFIN8.2%29+%28SURF8.2%29	2.7	0	1.5	0	0	0	0	18	0	22.2	0
PF3D7_0830900	chr8	1317600	1318341	-	1315000	PF08_0001	Plasmodium+exported+protein%2C+unknown+function	89.1	168.3	127.5	29.9	22.2	43	1.8	158.2	142.8	782.8	0
PF3D7_0831000	chr8	1321417	1322825	+	1325000	GEXP09	Plasmodium+exported+protein+%28PHISTb%29%2C+unknown+function+%28GEXP09%29	16.7	0	0	0	0	0	0	1.2	0	17.9	0
PF3D7_0831100	chr8	1325144	1331187	+	1325000	2655214	surface-associated+interspersed+gene+8.1%2C+%28SURFIN8.1%29+%28SURF8.1%29	1.9	3	3.3	0.5	0	0	8.4	22	29.5	68.6	0
PF3D7_0900100	chr9	20080	27885	+	25000	23504904	erythrocyte+membrane+protein+1%2C+PfEMP1+%28VAR%29	151.1	107.1	123.5	55	83.8	93.1	153.8	133.2	249.5	1150.1	0
PF3D7_0900200	chr9	29797	31157	-	35000	Q8I3E4	rifin+%28RIF%29	4.1	22.4	12.1	25.3	14.4	5	21.3	6.9	36.6	148.1	0
PF3D7_0900300	chr9	33553	34795	-	35000	CAD51689.1	rifin+%28RIF%29	1.2	13.9	8.2	0	2.9	11.1	30	21	189.6	277.9	0
PF3D7_0900400	chr9	39554	40740	+	45000	cytoadherencescheme	rifin+%28RIF%29	1.7	45.1	18	33.2	44.1	21.7	24.4	17.3	46.9	252.4	0
PF3D7_0900500	chr9	42909	44045	-	45000	XP_001351881.1	rifin+%28RIF%29	23.4	11.6	26.8	24.1	77.6	57.1	31.2	46.5	83.7	382	0
PF3D7_0900600	chr9	45902	47236	-	45000	rosetting	rifin+%28RIF%29	8.8	12.6	18	8.8	10.4	7.2	26.7	12.4	44.5	149.4	0
PF3D7_0900700	chr9	49612	50971	-	55000	4794203	rifin+%28RIF%29	33.7	21	22.6	69.5	22.8	36.5	28.9	77.5	99.4	411.9	0
PF3D7_0900800	chr9	52648	54020	-	55000	PFI0040c	erythrocyte+membrane+protein+1+%28PfEMP1%29%2C+exon2%2C+pseudogene+%28VAR+pseudogene%29	15.4	6.3	3.7	0	21.4	7.5	15.3	7.1	8.3	85	0
PF3D7_0900900	chr9	55074	56081	-	55000	Q8I3D8	stevor+%28STEVOR%29	16.4	8.2	22.1	60	9.9	7.7	10.3	7.7	16.6	158.9	0
PF3D7_0901000	chr9	58162	59240	-	55000	PFI0050c	rifin+%28RIF%29	13.2	9.6	18	21.8	27.5	4.1	9.9	4.7	23.6	132.4	0
PF3D7_0901100	chr9	61342	62553	-	65000	PF3D7_0901100	rifin+%28RIF%29	1.4	29.7	13	0	8.9	22.6	2.4	34.7	13.5	126.2	0
PF3D7_0901200	chr9	64216	64428	-	65000	PF3D7_0901200	Plasmodium+exported+protein%2C+unknown+function%2C+fragment	41.7	96.2	67.3	52	58.7	85.2	95.5	19.3	69.7	585.6	0
PF3D7_0901300	chr9	67334	68625	+	65000	23504915	rifin+%28RIF%29	8.3	9.5	5.5	5	0.9	4.1	7.3	11.3	55.4	107.3	0
PF3D7_0901400	chr9	70521	71738	+	75000	23504916	rifin+%28RIF%29	11.9	25.9	21.6	15	25.3	17.2	31.7	19.2	53.1	220.9	1
PF3D7_0901500	chr9	74409	75746	+	75000	XP_001351890.1	rifin+%28RIF%29	2.5	13.7	6	7.2	0	3.1	16.7	4.6	137.5	191.3	1
PF3D7_0901600	chr9	77861	78874	+	75000	PFI0080w	stevor+%28STEVOR%29	0	7.1	0	0.5	6.1	0	6.5	0	24.1	44.3	1
PF3D7_0901700	chr9	82002	82998	-	85000	813297	Plasmodium+exported+protein+%28hyp5%29%2C+unknown+function	18.8	103.3	324.1	293	244.1	68.2	11.8	5.5	32.1	1100.9	0
PF3D7_0901900	chr9	86774	88075	-	85000	PF3D7_0901900	probable+protein%2C+unknown+function	0	0	0.6	0	0	0	0	0	0	0.6	0
PF3D7_0902000	chr9	89361	91295	-	95000	PFI0095c	serine%2Fthreonine+protein+kinase%2C+FIKK+family+%28FIKK9.1%29	32.8	40.7	54.4	32.4	46.8	25.7	20.8	25.9	48.8	328.3	0
PF3D7_0902100	chr9	93830	95613	-	95000	Q8I3C7	serine%2Fthreonine+protein+kinase%2C+FIKK+family+%28FIKK9.2%29	2.2	10.1	1.7	9.4	38.7	35.8	7.9	3.2	9	118	0
PF3D7_0902200	chr9	98175	100339	-	95000	Protein_kinases	serine%2Fthreonine+protein+kinase%2C+FIKK+family+%28FIKK9.3%29	25.9	29.9	35	20.1	6.6	3.6	17.5	11	44	193.6	0
PF3D7_0902300	chr9	102492	104593	-	105000	XP_001351897.1	serine%2Fthreonine+protein+kinase%2C+FIKK+family+%28FIKK9.4%29	311.2	176.7	39.7	26.9	30.3	70.5	294.2	30.1	20.2	999.8	0
PF3D7_0902400	chr9	106514	108406	-	105000	redoxReg	serine%2Fthreonine+protein+kinase%2C+FIKK+family+%28FIKK9.5%29	0	0	27.7	20.5	12.9	5.4	12.1	0	6.4	85	0
PF3D7_0902500	chr9	109334	111329	-	115000	XP_001351899.1	serine%2Fthreonine+protein+kinase%2C+FIKK+family+%28FIKK9.6%29	43.8	12	2.2	0	6.1	7.1	103.6	0	2.2	177	0
PF3D7_0902600	chr9	113409	115549	-	115000	Protein_kinases	serine%2Fthreonine+protein+kinase%2C+FIKK+family+%28FIKK9.7%29	22.8	5.5	10.8	15.7	1	1.1	9.7	0	18.4	85	0
PF3D7_0902700	chr9	119261	120749	-	125000	12368867	Plasmodium+exported+protein+%28PHISTb%29%2C+unknown+function%2C+pseudogene	0	32.1	85.6	61.7	36.3	34.4	0	31.9	109	391	0
PF3D7_0902800	chr9	121621	125006	-	125000	XP_001351902.1	serine+repeat+antigen+9+%28SERA9%29	8.5	15.1	157.4	137	202.2	81.7	9.2	11.1	250.2	872.4	0
PF3D7_0903000	chr9	129224	129700	+	125000	813309	conserved+protein%2C+unknown+function	0	0	17.1	11.4	7.5	4	0	54.3	389	483.3	1
PF3D7_0903100	chr9	130140	130937	-	135000	PF3D7_0903100	retrieval+receptor+for+endoplasmic+reticulum+membrane+proteins%2C+putative	157.7	78.8	93	65.8	95.4	9.5	29.1	255.7	84.2	869.2	0
PF3D7_0903300	chr9	140977	150588	+	145000	12368867	conserved+Plasmodium+membrane+protein%2C+unknown+function	0	0	8.8	43.9	79.5	20	0	20.6	11.7	184.5	0
PF3D7_0903400	chr9	151700	159541	-	155000	PFI0165c	DEAD%2FDEAH+box+helicase%2C+putative	94.4	50.3	116.4	60.3	47.5	41.5	35.1	14.8	135.2	595.5	0
PF3D7_0903500	chr9	162769	166923	+	165000	XP_001351909.1	conserved+Plasmodium+protein%2C+unknown+function	52.7	37.2	43.2	32.8	9.1	14.6	14.5	0	0	204.1	0
PF3D7_0903600.1	chr9	168493	172887	+	175000	12368867	conserved+Plasmodium+protein%2C+unknown+function	0	0	0	0	16.8	24.1	0	28.7	20.4	90	0
PF3D7_0903700	chr9	175542	177442	+	175000	P14642.1	alpha+tubulin+1	5.6	18.4	51.2	71	56.1	73.6	22.3	106.5	26.9	431.6	0
PF3D7_0903800	chr9	179187	183991	+	185000	PFI0185w	LCCL+domain-containing+protein+%28CCp4%29	20.2	6.6	5.1	0.2	1.5	0	2.6	1789.8	2.7	1828.7	1
PF3D7_0903900	chr9	185821	186383	+	185000	124506631	60S+ribosomal+protein+L32%2C+putative	564.3	444.2	841.5	389.8	339.2	148.2	256.6	38.2	155	3177	0
PF3D7_0904000	chr9	187342	188622	-	185000	Q8I3A9	GTPase+activator%2C+putative	105.7	30.1	75.5	59.1	110.3	19.9	45.4	255.6	40	741.6	0
PF3D7_0904100	chr9	190858	195827	-	195000	PFI0200c	adapter-related+protein%2C+putative	4.2	0	9.2	0	3.2	0	0	2.8	0	19.4	0
PF3D7_0904200	chr9	197867	198816	+	195000	12368867	conserved+Plasmodium+protein%2C+unknown+function	0	0	0	0	0	0	0	2471	0	2471	1
PF3D7_0904300	chr9	199051	207458	-	205000	813322	conserved+protein%2C+unknown+function	0	4.1	1.2	9.7	0	9.1	0	56.3	16.7	97.1	1
PF3D7_0904400	chr9	208168	208725	-	205000	23504945	signal+peptidase+complex+subunit+3%2C+putative+%28SPC3%29	61.2	204.2	255.3	368.2	377.1	340	51.4	380.3	111.2	2148.9	0
PF3D7_0904500	chr9	210077	210609	+	215000	813324	prefoldin+subunit%2C+putative	0	0	0	0	0	0	0	15.2	0	15.2	0
PF3D7_0904600	chr9	212515	217983	+	215000	813325	ubiquitin+specific+protease%2C+putative	84	35	82.4	88.6	98.6	56.3	0	51.8	64.9	561.6	0
PF3D7_0904700	chr9	218675	219462	-	215000	PF3D7_0904700	bacterial+histone-like+protein+%28HU%29	10.3	27.6	73.2	92.7	113.9	93.6	5.1	66.5	61.5	544.4	0
PF3D7_0904800	chr9	222271	224156	+	225000	23504949	replication+protein+A1%2C+small+fragment	4.8	32.8	217.8	201.4	229.2	85	7.7	151.6	65.5	995.8	0
PF3D7_0904900	chr9	225019	232831	-	225000	124506651	Cu2++-transporting+ATPase%2C+putative+%28CUP%29	1.5	1.8	34.2	46.5	94.9	17.5	8.6	11.3	19.7	236	0
PF3D7_0905000	chr9	234501	235346	-	235000	813329	conserved+Plasmodium+protein%2C+unknown+function	0	0	0	0	0	0	0	0.5	0.6	1.1	0
PF3D7_0905100	chr9	236359	242969	-	235000	NUP100	nucleoporin+NUP100%2FNSP100%2C+putative+%28NUP100%29	115.7	83.2	190.4	137.5	179.9	103.5	77.5	38	39.2	964.9	0
PF3D7_0905200	chr9	245261	248860	-	245000	XP_001351926.1	mitochondrial+carrier+protein%2C+putative	0	3.5	9.6	0	5.5	1.7	21.7	0	39.6	81.6	0
PF3D7_0905300	chr9	251353	269709	-	265000	813332	dynein+heavy+chain%2C+putative	0	0	0	0	0	0	0	0	9	9	0
PF3D7_0905400	chr9	270740	274789	-	275000	RhopH3	high+molecular+weight+rhoptry+protein+3+%28RhopH3%29	70.6	5.1	102.3	410.8	1597.4	1074.4	24	35.7	21.6	3341.9	0
PF3D7_0905500	chr9	278369	279088	+	275000	PFI0270w	conserved+Plasmodium+protein%2C+unknown+function	50.9	38.7	53.8	265.3	956.6	1008.1	50.1	164.1	80.4	2668	0
PF3D7_0905600	chr9	280207	284102	+	285000	PF3D7_0905600	conserved+Plasmodium+protein%2C+unknown+function	0	0	0	0	0	0	0	15.6	0	15.6	1
PF3D7_0905700.2	chr9	284200	286640	-	285000	12368867	autophagy-related+protein+3%2C+putative	47.7	77.9	120.1	120.4	105.8	83.7	19	140	40.8	755.4	0
PF3D7_0905800	chr9	289050	292897	+	295000	CAD51743.1	conserved+Plasmodium+protein%2C+unknown+function	9.8	8	26.8	0	0.3	0	0	0	0.5	45.4	0
PF3D7_0905900	chr9	293585	296617	-	295000	813338	beta+subunit+of+coatomer+complex%2C+putative	27	0	15.6	6.2	44.2	0.3	0	2.3	0	95.6	0
PF3D7_0906000	chr9	298665	304179	-	305000	C0H520	RNB-like+protein%2C+putative	0	4.7	8.1	15.1	1.8	0	0	2	0	31.7	0
PF3D7_0906100	chr9	305070	306626	+	305000	PFI0300w	developmental+protein%2C+putative	5.7	18.3	47.2	75.6	84.4	54.9	22.2	86.9	30.1	425.3	0
PF3D7_0906200	chr9	307303	309039	-	305000	124506677	conserved+Plasmodium+protein%2C+unknown+function	0	3.2	1.2	7	7.9	0	3.8	0	2	25.1	0
PF3D7_0906300	chr9	310691	311995	+	315000	XP_001351937.1	Maf-like+protein%2C+putative	29.6	17.6	18.8	34.4	19.4	7	9.1	111.3	2.4	249.6	0
PF3D7_0906400	chr9	312474	314987	-	315000	molecularMotor	dynein+light+intermediate+chain+2%2C+cytosolic	0.4	1.5	2.5	1.7	6.8	0	8.5	221	33	275.4	1
PF3D7_0906500	chr9	318311	319546	+	315000	813344	arginase	54.3	45.3	29.5	29.4	28.2	35.5	78.3	124.7	50.8	476	0
PF3D7_0906600	chr9	320811	323342	-	325000	PFI0325c	zinc+finger+protein%2C+putative	531.3	143.3	403	187.9	80	112.3	541.8	72.8	364.5	2436.9	0
PF3D7_0906800	chr9	332255	334597	-	335000	296005169	probable+protein%2C+unknown+function	18.3	16.8	38	39	33.7	2.3	20.1	21.2	8.8	198.2	0
PF3D7_0906900	chr9	335071	336770	+	335000	23504970	tubulin-specific+chaperone%2C+putative	65.7	34.1	106.1	46.2	52.7	8.1	15.4	79.4	120.3	528	0
PF3D7_0907100	chr9	338140	342408	-	345000	124506691	conserved+Plasmodium+protein%2C+unknown+function	0.6	8.5	83.2	27.2	24.7	16.6	5.4	66.9	51.8	284.9	0
PF3D7_0907200	chr9	345892	349293	+	345000	23504972	GTPase+activator%2C+putative	175.6	38.9	88.5	56.6	71.1	73.1	31.3	54	50.4	639.5	0
PF3D7_0907300	chr9	350186	350962	-	355000	12368867	conserved+Plasmodium+protein%2C+unknown+function	5.7	0	13	1	0	6.4	3.4	11	7.7	48.2	0
PF3D7_0907400	chr9	351955	354723	-	355000	124506697	ATP-dependent+protease+ATPase+subunit+ClpY+%28ClpY%29	3.1	1.7	8.4	13.1	35.7	0	8.4	18.2	0	88.6	0
PF3D7_0907500	chr9	356665	357683	-	355000	124506699	conserved+Plasmodium+protein%2C+unknown+function	8.4	4.6	25.1	39	209.6	262.3	30.1	759.2	68.4	1406.7	0
PF3D7_0907600	chr9	360535	363215	+	365000	813353	translation+initiation+factor+SUI1%2C+putative	38.8	44.1	50.3	29.3	63.1	19.2	0	64.9	11.8	321.5	0
PF3D7_0907700	chr9	364069	364908	-	365000	23504977	subunit+of+proteaseome+activator+complex%2C+putative	77.7	18.6	72.4	37.5	48.6	51.1	60.1	5.2	19.9	391.1	0
PF3D7_0907800	chr9	366925	367500	+	365000	apicoplastgene	apicoplast+ribosomal+protein+L35+precursor%2C+putative	40.4	31.3	94.4	143.7	211.5	55	87.4	490.7	242	1396.4	0
PF3D7_0907900	chr9	367865	368789	-	365000	apicoplastgene	peptide+deformylase+%28PDF%29	0	0.6	42.4	41.9	52.2	16.9	0	77.5	64	295.5	0
PF3D7_0908000	chr9	369870	371554	-	375000	225631804	P1+nuclease%2C+putative	4.4	0.1	3.5	3.5	29.2	12.6	0	0.1	1.2	54.6	0
PF3D7_0908100	chr9	373762	375586	-	375000	PFI0390c	conserved+Plasmodium+membrane+protein%2C+unknown+function	2.5	0.1	6.3	14.8	25.9	39.6	4.4	17.4	15	126	0
PF3D7_0908200	chr9	378035	382996	+	385000	PF3D7_0908200	conserved+Plasmodium+protein%2C+unknown+function	0	0	1.4	21.2	39.1	22.7	0	18.4	20.9	123.7	0
PF3D7_0908300.1	chr9	383650	385716	-	385000	PFI0400c	conserved+Plasmodium+membrane+protein%2C+unknown+function	8.2	23.2	222.7	285.6	264.4	145.3	23.5	760.9	41.2	1775	0
PF3D7_0908400	chr9	388149	388736	+	385000	PFI0405w	conserved+Plasmodium+protein%2C+unknown+function	0	0	14.8	36.2	68.2	41.2	0	69.8	0	230.2	0
PF3D7_0908500	chr9	389605	397843	-	395000	12368867	conserved+Plasmodium+protein%2C+unknown+function	0	0	2.6	7	49.9	26.9	0	17.2	0	103.6	0
PF3D7_0908600	chr9	399202	400725	-	395000	12368867	ribosomal+RNA+methyltransferase%2C+putative	8.8	4	6.1	14.9	9.8	1.5	0	2.8	6.7	54.6	0
PF3D7_0908700	chr9	401495	403394	-	405000	XP_001351959.2	tRNA+pseudouridine+synthase%2C+putative	20.9	10	57.4	20.5	38.1	11.3	2.3	61.1	9.3	230.9	0
PF3D7_0908800	chr9	404312	406285	+	405000	Q8I364	transporter%2C+putative	53.8	61.5	64.1	62.6	45.5	19.6	0.2	28	24.5	359.8	0
PF3D7_0908900	chr9	406522	409665	-	405000	PFI0430c	conserved+Plasmodium+protein%2C+unknown+function	4.4	9.2	46.3	23.3	25.6	0.3	0	19.3	1.4	129.8	0
PF3D7_0909000	chr9	410326	413841	-	415000	Q8I362	conserved+Plasmodium+protein%2C+unknown+function	0	0	0	0	0	0	0	17.2	2.5	19.7	0
PF3D7_0909100	chr9	415205	417433	+	415000	CAX64205.1	conserved+Plasmodium+membrane+protein%2C+unknown+function	0	3.5	5.6	28.1	24	14.6	3.2	245.2	9.7	333.9	0
PF3D7_0909200	chr9	418208	419895	-	415000	124506733	conserved+Plasmodium+protein%2C+unknown+function	0	0	0	0	0.2	0	0	31.7	9.3	41.2	0
PF3D7_0909300	chr9	420485	421682	-	425000	XP_001351965.2	apoptosis-related+protein%2C+putative+%28ARP%29	15.1	7.1	13.8	0	0	1.7	8.2	10.1	6.1	62.1	0
PF3D7_0909400	chr9	424171	428106	+	425000	PFI0455w	exoribonuclease%2C+putative	300.1	223.8	416.2	275.4	263.1	137.7	86.9	591.7	51	2345.9	0
PF3D7_0909500	chr9	430578	432047	+	435000	Q8I357	subpellicular+microtubule+protein+1%2C+putative+%28SPM1%29	40.4	110.4	58.2	80.3	78.1	118	98.1	2401	102.8	3087.3	1
PF3D7_0909600	chr9	433238	435373	-	435000	23504996	conserved+Plasmodium+protein%2C+unknown+function	0	0	56.7	128.5	110.6	84.5	1	74.5	144.9	600.7	0
PF3D7_0909700	chr9	440914	444024	+	445000	XP_001351969.1	FHA+domain+protein%2C+putative	28.6	2.3	14.9	0.3	33.8	32.2	39.5	67.4	7.9	226.9	0
PF3D7_0909800	chr9	445788	446329	+	445000	SNRPD3	small+nuclear+ribonucleoprotein+Sm+D3%2C+putative+%28SNRPD3%29	226	138.9	255	164.4	131.8	55.3	94.6	267	81.8	1414.8	0
PF3D7_0909900	chr9	447928	452049	+	445000	PF3D7_0909900	helicase+with+Zn-finger+motif%2C+putative	4.2	4.5	4.9	0	2.6	0	0	0	0	16.2	0
PF3D7_0910000	chr9	452399	455743	-	455000	23505000	SET+domain+protein%2C+putative+%28SET4%29	10	17.1	20.9	28.9	20	10.1	13.5	12.8	14	147.3	0
PF3D7_0910100	chr9	456959	461318	-	455000	12368867	Ran-binding+protein%2C+putative	177.4	151.9	313	339.1	323.6	227.1	11.4	77.6	55.9	1677	0
PF3D7_0910200	chr9	464559	473768	+	465000	12368867	conserved+Plasmodium+protein%2C+unknown+function	52.7	1.6	33.9	18.4	72.1	9.9	0	23.4	29.1	241.1	0
PF3D7_0910300	chr9	475671	476969	+	475000	PF3D7_0910300	conserved+Plasmodium+protein%2C+unknown+function	54.9	46.3	93	44.6	47.3	17.9	6.5	20.8	28.5	359.8	0
PF3D7_0910400	chr9	477777	481358	-	475000	CAD51787.1	selenide+water+dikinase%2C+putative	3	6.7	30.5	25	38.2	0	0	19.6	16.6	139.6	0
PF3D7_0910500	chr9	482461	487554	-	485000	23505005	DNA+repair+protein+REV1%2C+putative	0	0	0	0	0	0	0	3.6	0	3.6	0
PF3D7_0910600	chr9	489467	490865	+	495000	PF3D7_0910600	SNARE+protein+%28Ykt6.1%29	51.7	60	111.2	91.8	91.5	173.3	18.7	394.6	136.6	1129.4	0
PF3D7_0910700	chr9	491275	492906	+	495000	813384	actin-like+protein%2C+putative	0	0.9	9.7	10.4	0	4.5	0	0.4	4.1	30	0
PF3D7_0910800	chr9	494163	495506	+	495000	PFI0525w	nucleotide+binding+protein%2C+putative	24.3	36.1	94.6	94.7	70.4	28.8	4.8	24.7	23	401.4	0
PF3D7_0910900	chr9	495946	497727	-	495000	dnareplication	DNA+primase+large+subunit%2C+putative	2.7	4.3	93.1	166.1	180.7	91.4	20.6	200.5	196.5	955.9	0
PF3D7_0911000	chr9	500183	502733	+	505000	PFI0535w	phosphatidylinositol+N-acetylglucosaminyltransferase%2C+putative	1660.6	1381.4	2019	3179.3	3332.4	2981.2	2402.1	4147.6	9362.7	30466.3	0
PF3D7_0911100	chr9	504412	508130	+	505000	CAD51794.1	conserved+Plasmodium+protein%2C+unknown+function	11.2	2.8	0.6	5.5	102.2	328.7	0	176	1135.8	1762.8	0
PF3D7_0911200	chr9	509934	510527	+	515000	PFI0545w	conserved+Plasmodium+protein%2C+unknown+function	0	0	12	19.4	12.6	9.5	7.5	122	29.8	212.8	1
PF3D7_0911300	chr9	511497	521529	+	515000	813390	cysteine+repeat+modular+protein+1+%28CRMP1%29	0	0	8.9	2.1	6.7	0	0	17.1	76.3	111.1	1
PF3D7_0911400	chr9	522221	526018	-	525000	813391	conserved+Plasmodium+protein%2C+unknown+function	71.9	74.5	203.1	83.6	53	20.9	17	24.2	14.8	563	0
PF3D7_0911500.1	chr9	526940	527978	-	525000	PFI0560c	conserved+Plasmodium+protein%2C+unknown+function	7.3	0	0	67.6	0.9	0	0	76	5	156.8	1
PF3D7_0911600	chr9	529912	531444	+	535000	296005197	conserved+Plasmodium+protein%2C+unknown+function	0	0	5	17.2	10.2	0	0	83.6	14.3	130.3	0
PF3D7_0911700	chr9	532341	535598	+	535000	23505017	GTP+binding+protein%2C+putative	3.6	25.3	91.3	87.2	78.6	56.9	16.4	4.9	15.4	379.6	0
[truncated: 2,958 more rows]
