# Supplementary material for: Three-dimensional modeling of theP. falciparumgenome during the erythrocytic cycle reveals a strong connection between genome architecture and gene expression
Source: HighWire-hosted journal article supplement (doi:10.1101/gr.169417.113), 2014-03-26
Supplement: Supplemental_Figures__Information.pdf [file Supplemental_Figures__Information.pdf]

## Supplementary Tables

|    |                                                                                                                                                |    |
|----|------------------------------------------------------------------------------------------------------------------------------------------------|----|
| 1  | Quality measures for Hi-C data. . . . .                                                                                                        | 3  |
| 2  | GSEA results for genes involved in stage-specific contacts. . . . .                                                                            | 4  |
| 3  | Assessing sensitivity of the 3D inference to different parameter settings. . . . .                                                             | 5  |
| 4  | Assessing sensitivity of the 3D inference to spatial constraints. . . . .                                                                      | 6  |
| 5  | Colocalization test for 21 gene/locus sets. . . . .                                                                                            | 7  |
| 6  | Sequences of primers used for the generation of FISH probes. . . . .                                                                           | 8  |
| 7  | Gradient values of the log-linear fits that best capture the scaling of contact probability with genomic distance for each chromosome. . . . . | 9  |
| 8  | GSEA results for the ring stage on the first component of the kCCA. . . . .                                                                    | 10 |
| 9  | GSEA results for the trophozoite stage on the first component of the kCCA. . . . .                                                             | 11 |
| 10 | GSEA results for the schizont stage on the first component of the kCCA. . . . .                                                                | 12 |
| 11 | kCCA enrichment of 15 expression clusters. . . . .                                                                                             | 13 |
| 12 | GSEA results for the second component of the kCCA. . . . .                                                                                     | 14 |
| 13 | Density score for varying values of $\beta$ parameter at different stages. . . . .                                                             | 15 |

## Supplementary Figures

|    |                                                                                                                        |    |
|----|------------------------------------------------------------------------------------------------------------------------|----|
| 1  | Power-law fits to 10 kb aggregated data. . . . .                                                                       | 16 |
| 2  | Biases in raw and corrected contact maps for ring stage. . . . .                                                       | 17 |
| 3  | Chromosome visualizations. . . . .                                                                                     | 18 |
| 4  | Similarity between 3D models inferred from 100 different initializations. . . . .                                      | 33 |
| 5  | Clustering of the 100 structures using pairwise RMSD values. . . . .                                                   | 34 |
| 6  | Conservation of centromere, telomere and VRSM gene colocalizations across 100 different initializations. . . . .       | 35 |
| 7  | 3D structures of all three stages (centromere clustering). . . . .                                                     | 36 |
| 8  | Hierarchical clustering of compartment distance matrices. . . . .                                                      | 37 |
| 9  | Validation of 3D models with DNA FISH. . . . .                                                                         | 38 |
| 10 | Clustering of highly transcribed rDNA units in Lemieux et al. data. . . . .                                            | 39 |
| 11 | Comparison of inter and intrachromosomal contact prevalence. . . . .                                                   | 40 |
| 12 | Changes in chromosome territories during the erythrocytic cycle. . . . .                                               | 41 |
| 13 | Movement of chromosome compartments with respect to each other. . . . .                                                | 42 |
| 14 | Volume exclusion modeling and correlation calculation. . . . .                                                         | 43 |
| 15 | Quantification of domain-like behavior of VRSM gene clusters. . . . .                                                  | 44 |
| 16 | Revisiting the relationship between 3D architecture and gene expression by excluding VRSM genes. . . . .               | 45 |
| 17 | The relationship between distance to the telomeres, nuclear center and centromeres versus the gene expression. . . . . | 46 |
| 18 | kCCA expression profiles component score. . . . .                                                                      | 47 |

## Supplementary Notes

|   |                                                            |    |
|---|------------------------------------------------------------|----|
| 1 | Tethered conformation capture procedure protocol . . . . . | 48 |
|---|------------------------------------------------------------|----|

|   |                                                                         |    |
|---|-------------------------------------------------------------------------|----|
| 2 | Assigning statistical significance to normalized contact maps . . . . . | 49 |
| 3 | DNA-FISH protocol . . . . .                                             | 50 |
| 4 | Volume exclusion modeling . . . . .                                     | 50 |

## Supplementary Files

Files and datasets that are too large to include in this supplement are made available through <http://noble.gs.washington.edu/proj/plasmo3d>.

**SuppFile1-mapping-and-filtering.xlsx** This file summarizes the results of applying our mapping and filtering pipeline to the sequences from each Hi-C library generated in this work.

**SuppFile2-contacts-at-0.1-FDR.xlsx** This file lists, for each stage (ring, trophozoite, schizont), the set of contacts at 10 kb that were assigned a q-value  $< 0.1$  (Methods). Rows are sorted from lowest to highest q-value and are colored using two other q-value thresholds (0.05 and 0.01).

**SuppFile3-Var,Rif,Stevor,MC(VRSM)-clusters.xlsx** This file contains the chromosomal coordinates of all *var*, *rifin*, *stevor*, and *Pfmc-2tm* (VRSM) genes, as well as the boundaries of subtelomeric and internal VRSM gene clusters.

**SuppFile4-dynamic-model-all-chromosomes.mov** This movie shows the dynamic changes in the architecture of all chromosomes during the *Plasmodium* erythrocytic cycle inferred by a linear interpolation of bead positions from one stage to the next by aligning the structures of adjacent stages. The movie starts and ends at the ring stage (ring–trophozoite–schizont–ring). Each chromosome is represented by a different color, and purple regions mark VRSM gene clusters. Telomeres are indicated by white spheres.

**SuppFile{5–18}-dynamic-model-chr{1–14}.mov** These movies are the same as the previous movie, but each focuses on a single chromosome.

## Supplementary Tables

**Supplementary Table 1: Quality measures for Hi-C data.**

*P. falciparum* libraries are presented in this work and *S. cerevisiae* libraries from Duan et al. [1] are listed here for comparison. Rows marked with bold are control libraries that were generated without the cross-linking step of the Hi-C protocol. Interchromosomal contact probability (*ICP* [2]) and percent of long-range contacts (*PLRC*) values are computed as described in Methods.

| <i>Organism</i>          | <i>Library</i>                         | <i>ICP</i>  | <i>PLRC</i>  |
|--------------------------|----------------------------------------|-------------|--------------|
| <i>P. falciparum</i>     | Ring                                   | 1.13        | 9.04%        |
|                          | Trophozoite                            | 0.66        | 7.64%        |
|                          | Schizont                               | 0.74        | 22.04%       |
|                          | <b>Trophozoite (not cross-linked)</b>  | <b>7.82</b> | <b>3.05%</b> |
| <i>S. cerevisiae</i> [1] | HindIII-MspI                           | 1.92        | 8.99%        |
|                          | HindIII-MseI                           | 2.31        | 12.08%       |
|                          | EcoRI-MspI                             | 1.71        | 3.99%        |
|                          | EcoRI-MseI                             | 1.86        | 4.19%        |
|                          | <b>HindIII-MspI (not cross-linked)</b> | <b>4.26</b> | <b>3.39%</b> |

**Supplementary Table 2: GSEA results for genes involved in stage-specific contacts.**

For each stage, GSEA is applied to the set of genes that participate in contacts that are specific to that stage (Methods). For the *Type* column CC denotes “Cellular Component”, MF denotes “Molecular Function” and BP denotes “Biological Process”. Enrichments with  $q\text{-value} < 0.1$  are shown.

| <i>Stage</i> | <i>GO term</i> | <i>Description</i>                                     | <i>Type</i> | <i>q-value</i> |
|--------------|----------------|--------------------------------------------------------|-------------|----------------|
| Ring         | GO:0020033     | antigenic variation                                    | BP          | 0.099          |
|              | GO:0020002     | host cell plasma membrane                              | CC          | 0.004          |
| Trophozoite  | GO:0020030     | infected host cell surface knob                        | CC          | 0.008          |
|              | GO:0016021     | integral to membrane                                   | CC          | 0.015          |
|              | GO:0004872     | receptor activity                                      | MF          | 0.007          |
|              | GO:0050839     | cell adhesion molecule binding                         | MF          | 0.020          |
|              | GO:0020033     | antigenic variation                                    | BP          | 0.010          |
|              | GO:0009405     | pathogenesis                                           | BP          | 0.010          |
|              | GO:0020013     | modulation by symbiont of host erythrocyte aggregation | BP          | 0.012          |
|              | GO:0020035     | cytoadherence to microvasculature                      | BP          | 0.016          |
|              | GO:0016337     | cell-cell adhesion                                     | BP          | 0.022          |
|              |                |                                                        |             |                |



**Supplementary Table 3: Assessing sensitivity of the 3D inference to different parameter settings.**

RMSD and distance difference values in nanometers (nm) between structures inferred from an unconstrained MDS with five different  $\beta$  values ranging from 0.4 to 0.6.

| <i>Stage</i> | <i>RMSD</i>               | <i>Distance difference</i> |
|--------------|---------------------------|----------------------------|
|              | Mean (Standard deviation) | Mean (Standard deviation)  |
| Ring         | 10.39 (4.24)              | 5.75 (2.68)                |
| Trophozoite  | 17.76 (6.57)              | 10.62 (4.65)               |
| Schizont     | 12.90 (5.71)              | 8.10 (4.08)                |

**Supplementary Table 4: Assessing sensitivity of the 3D inference to spatial constraints.**

RMSD and distance difference values in nanometers (nm) between a structure inferred using constrained MDS and a structure from the corresponding unconstrained MDS.

| <i>Stage</i> | <i>RMSD</i> | <i>Distance difference</i> |
|--------------|-------------|----------------------------|
| Ring         | 8.05        | 0.01                       |
| Trophozoite  | 61.99       | 0.83                       |
| Schizont     | 7.86        | 0.01                       |

**Supplementary Table 5: Colocalization test for 21 gene/locus sets.**

We applied a previously described statistical test [3] to assess whether the loci in each set colocalize more than expected by chance (only interchromosomal pairs are considered). This test involves calculation of a colocalization statistic, which requires labeling of each locus pair as “close” or “far”. We used varying distance thresholds (10%, 20% and 40% of the nuclear diameter) to deem a locus pair “close” and labeled all remaining pairs in the set as “far”. We generated 3000 random locus sets to compute a p-value for each test. We corrected the p-values for multiple hypothesis testing using the Benjamini-Hochberg procedure [4] to compute the associated q-value. Grey color indicates a q-value < 0.05. Centromere coordinates were extracted from Hoeijmakers et al. [5]. Telomeres were defined as 20 kb regions at each end of each chromosome. The sets of internal and subtelomeric VRSM genes were tested all together as well as separately. The rDNA set consists of five units of 18S-5.8S-28S rDNA genes and one tandem of three 5S rDNA genes [6]. Clusters 1–15 correspond to expression clusters described in Le Roch et al. [7].

| <i>Gene set</i>      | <i>Ring</i> |       |       | <i>Trophozoite</i> |       |       | <i>Schizont</i> |       |       |
|----------------------|-------------|-------|-------|--------------------|-------|-------|-----------------|-------|-------|
|                      | 10%         | 20%   | 40%   | 10%                | 20%   | 40%   | 10%             | 20%   | 40%   |
| Centromeres          | 0.003       | 0.000 | 0.000 | 0.000              | 0.000 | 0.000 | 0.000           | 0.000 | 0.000 |
| Telomeres            | 0.000       | 0.000 | 0.000 | 0.000              | 0.000 | 0.000 | 0.000           | 0.000 | 0.000 |
| VRSM (all)           | 0.000       | 0.000 | 0.000 | 0.000              | 0.000 | 0.000 | 0.000           | 0.000 | 0.000 |
| VRSM (internal)      | 0.388       | 0.215 | 0.070 | 0.152              | 0.023 | 0.079 | 0.246           | 0.077 | 0.025 |
| VRSM (sub-telomeric) | 0.000       | 0.000 | 0.000 | 0.000              | 0.000 | 0.000 | 0.000           | 0.000 | 0.000 |
| rDNA genes           | 1.000       | 0.277 | 0.463 | 0.124              | 0.037 | 0.060 | 1.000           | 1.000 | 0.442 |
| Cluster 1            | 0.103       | 0.011 | 0.115 | 0.018              | 0.133 | 0.133 | 0.135           | 0.007 | 0.013 |
| Cluster 2            | 0.449       | 0.069 | 0.014 | 0.219              | 0.054 | 0.015 | 0.947           | 0.809 | 0.117 |
| Cluster 3            | 0.215       | 0.014 | 0.075 | 0.437              | 0.002 | 0.001 | 0.758           | 0.809 | 0.033 |
| Cluster 4            | 0.106       | 0.000 | 0.000 | 0.002              | 0.000 | 0.000 | 0.701           | 0.089 | 0.000 |
| Cluster 5            | 0.449       | 0.701 | 0.291 | 0.779              | 0.045 | 0.002 | 0.508           | 0.528 | 0.682 |
| Cluster 6            | 0.849       | 0.228 | 0.000 | 0.029              | 0.000 | 0.000 | 0.396           | 0.441 | 0.026 |
| Cluster 7            | 0.291       | 0.000 | 0.000 | 0.596              | 0.001 | 0.074 | 0.704           | 0.523 | 0.011 |
| Cluster 8            | 0.047       | 0.054 | 0.016 | 0.015              | 0.006 | 0.033 | 0.208           | 0.117 | 0.592 |
| Cluster 9            | 0.508       | 0.063 | 0.014 | 0.040              | 0.001 | 0.002 | 0.468           | 0.809 | 0.117 |
| Cluster 10           | 0.048       | 0.043 | 0.007 | 0.000              | 0.000 | 0.000 | 0.355           | 0.208 | 0.007 |
| Cluster 11           | 0.198       | 0.019 | 0.063 | 0.411              | 0.000 | 0.000 | 0.601           | 0.446 | 0.013 |
| Cluster 12           | 0.028       | 0.010 | 0.000 | 0.006              | 0.000 | 0.000 | 0.523           | 0.007 | 0.000 |
| Cluster 13           | 0.091       | 0.021 | 0.075 | 0.033              | 0.003 | 0.000 | 0.711           | 0.028 | 0.001 |
| Cluster 14           | 0.155       | 0.082 | 0.046 | 0.688              | 0.000 | 0.000 | 0.751           | 0.039 | 0.000 |
| Cluster 15           | 0.046       | 0.014 | 0.103 | 0.016              | 0.058 | 0.002 | 0.758           | 0.809 | 0.011 |

**Supplementary Table 6: Sequences of primers used for the generation of FISH probes.**

| <i>Chr.</i> | <i>Annotation</i> | <i>Locus (kb)</i> | <i>Forward primer</i>        | <i>Reverse primer</i>        |
|-------------|-------------------|-------------------|------------------------------|------------------------------|
| 7           | VRSM              | 550 - 560         | 5'-GATGGTAGAAGATAATAGGG -3'  | 5'-GACAAGTATAAGAACCAACC-3'   |
| 8           | VRSM              | 40 - 50           | 5'-CGAAAGATAGTAGTGATGGT-3'   | 5'-CACTTATGCATTTCCATCCA-3'   |
| 7           | Non-VRSM          | 810 - 820         | 5'-GCTTCCTTAATTGGACATTC-3'   | 5'-GAATTCGTTGGAGATTCTGT-3'   |
| 11          | Non-VRSM          | 820 - 830         | 5'-CACTGAACAAGTAGTGTAATCA-3' | 5'-GTTTCATCTTCAGAAGTAAGAG-3' |
| 2           | Non-VRSM          | 440 - 450         | 5'-GTTCCTACAGGTTTAGATCT-3'   | 5'-CATGAGGACATATTCACTTG-3'   |
| 4           | Non-VRSM          | 1,160 - 1,170     | 5'-AAGTACAGGTGTAGGTAAAG-3'   | 5'-CGTAGCTTTAACCTGTTGTA-3'   |

**Supplementary Table 7: Gradient values of the log-linear fits that best capture the scaling of contact probability with genomic distance for each chromosome.**

Gradient ( $\alpha$ ) values for each chromosome at each stage calculated by fitting a power-law curve of the form  $P(s) \sim s^\alpha$  to the intrachromosomal contact probability  $P(s)$  as a function of genomic distance  $s$ . The reported  $\alpha$  values are computed using raw contact maps at a single restriction enzyme fragment resolution for a genomic distance range of 20–250 kb.

| <i>Chromosome</i> | <i>Ring</i> | <i>Trophozoite</i> | <i>Schizont</i> |
|-------------------|-------------|--------------------|-----------------|
| 1                 | -1.02       | -1.18              | -1.04           |
| 2                 | -0.99       | -1.22              | -1.01           |
| 3                 | -0.99       | -1.20              | -0.98           |
| 4                 | -0.97       | -1.13              | -0.99           |
| 5                 | -0.97       | -1.14              | -0.96           |
| 6                 | -1.01       | -1.19              | -1.00           |
| 7                 | -1.02       | -1.27              | -1.01           |
| 8                 | -1.00       | -1.19              | -0.98           |
| 9                 | -0.99       | -1.11              | -0.94           |
| 10                | -0.97       | -1.14              | -0.96           |
| 11                | -0.97       | -1.11              | -0.94           |
| 12                | -0.99       | -1.14              | -0.97           |
| 13                | -0.97       | -1.07              | -0.93           |
| 14                | -0.98       | -1.09              | -0.93           |

**Supplementary Table 8: GSEA results for the ring stage on the first component of the kCCA.**

GSEA is applied to the ranked list of genes per projection on the kCCA component. For the *Enrichment* column, *t* denotes enrichment near the telomeres, and *n-t* denotes enrichment in non-telomeric regions. For the *Type* column CC denotes “Cellular Component”, MF denotes “Molecular Function” and BP denotes “Biological Process”. Enrichments with *q*-value < 0.1 are shown.

| <i>GO term</i> | <i>Description</i>                                     | <i>Type</i> | <i>Enrichment</i> | <i>q-value</i> |
|----------------|--------------------------------------------------------|-------------|-------------------|----------------|
| GO:0020002     | host cell plasma membrane                              | CC          | t                 | 0.000          |
| GO:0020030     | infected host cell surface knob                        | CC          | t                 | 0.000          |
| GO:0020036     | Maurer’s cleft                                         | CC          | t                 | 0.000          |
| GO:0005840     | ribosome                                               | CC          | n-t               | 0.000          |
| GO:0005622     | intracellular                                          | CC          | n-t               | 0.000          |
| GO:0022627     | cytosolic small ribosomal subunit                      | CC          | n-t               | 0.000          |
| GO:0022625     | cytosolic large ribosomal subunit                      | CC          | n-t               | 0.000          |
| GO:0015935     | small ribosomal subunit                                | CC          | n-t               | 0.000          |
| GO:0005783     | endoplasmic reticulum                                  | CC          | n-t               | 0.000          |
| GO:0015934     | large ribosomal subunit                                | CC          | n-t               | 0.000          |
| GO:0005789     | endoplasmic reticulum membrane                         | CC          | n-t               | 0.000          |
| GO:0005839     | proteasome core complex                                | CC          | n-t               | 0.006          |
| GO:0005794     | Golgi apparatus                                        | CC          | n-t               | 0.008          |
| GO:0005829     | cytosol                                                | CC          | n-t               | 0.008          |
| GO:0005739     | mitochondrion                                          | CC          | n-t               | 0.018          |
| GO:0016021     | integral to membrane                                   | CC          | t                 | 0.034          |
| GO:0005694     | chromosome                                             | CC          | n-t               | 0.064          |
| GO:0004872     | receptor activity                                      | MF          | t                 | 0.000          |
| GO:0050839     | cell adhesion molecule binding                         | MF          | t                 | 0.000          |
| GO:0046789     | host cell surface receptor binding                     | MF          | t                 | 0.000          |
| GO:0003735     | structural constituent of ribosome                     | MF          | n-t               | 0.000          |
| GO:0004175     | endopeptidase activity                                 | MF          | n-t               | 0.010          |
| GO:0003677     | DNA binding                                            | MF          | n-t               | 0.011          |
| GO:0005215     | transporter activity                                   | MF          | n-t               | 0.034          |
| GO:0004298     | threonine-type endopeptidase activity                  | MF          | n-t               | 0.035          |
| GO:0003676     | nucleic acid binding                                   | MF          | n-t               | 0.094          |
| GO:0016881     | acid-amino acid ligase activity                        | MF          | n-t               | 0.094          |
| GO:0020033     | antigenic variation                                    | BP          | t                 | 0.000          |
| GO:0009405     | pathogenesis                                           | BP          | t                 | 0.000          |
| GO:0020035     | cytoadherence to microvasculature                      | BP          | t                 | 0.000          |
| GO:0020013     | modulation by symbiont of host erythrocyte aggregation | BP          | t                 | 0.000          |
| GO:0016337     | cell-cell adhesion                                     | BP          | t                 | 0.000          |
| GO:0006412     | translation                                            | BP          | n-t               | 0.000          |
| GO:0006886     | intracellular protein transport                        | BP          | n-t               | 0.000          |
| GO:0006511     | ubiquitin-dependent protein catabolic process          | BP          | n-t               | 0.001          |
| GO:0045454     | cell redox homeostasis                                 | BP          | n-t               | 0.019          |
| GO:0007264     | small GTPase mediated signal transduction              | BP          | n-t               | 0.025          |
| GO:0006281     | DNA repair                                             | BP          | n-t               | 0.025          |
| GO:0006260     | DNA replication                                        | BP          | n-t               | 0.025          |
| GO:0016192     | vesicle-mediated transport                             | BP          | n-t               | 0.027          |
| GO:0006414     | translational elongation                               | BP          | n-t               | 0.029          |
| GO:0015031     | protein transport                                      | BP          | n-t               | 0.029          |

**Supplementary Table 9: GSEA results for the trophozoite stage on the first component of the kCCA.**

GSEA is applied to the ranked list of genes per projection on the kCCA component. For the *Enrichment* column, *t* denotes enrichment near the telomeres, and *n-t* denotes enrichment in non-telomeric regions. For the *Type* column CC denotes “Cellular Component”, MF denotes “Molecular Function” and BP denotes “Biological Process”. Enrichments with *q*-value < 0.1 are shown.

| <i>GO term</i> | <i>Description</i>                                     | <i>Type</i> | <i>Enrichment</i> | <i>q-value</i> |
|----------------|--------------------------------------------------------|-------------|-------------------|----------------|
| GO:0005840     | ribosome                                               | CC          | n-t               | 0.000          |
| GO:0005622     | intracellular                                          | CC          | n-t               | 0.000          |
| GO:0022627     | cytosolic small ribosomal subunit                      | CC          | n-t               | 0.000          |
| GO:0005789     | endoplasmic reticulum membrane                         | CC          | n-t               | 0.000          |
| GO:0005783     | endoplasmic reticulum                                  | CC          | n-t               | 0.000          |
| GO:0022625     | cytosolic large ribosomal subunit                      | CC          | n-t               | 0.000          |
| GO:0015935     | small ribosomal subunit                                | CC          | n-t               | 0.000          |
| GO:0020002     | host cell plasma membrane                              | CC          | t                 | 0.000          |
| GO:0020030     | infected host cell surface knob                        | CC          | t                 | 0.000          |
| GO:0020036     | Maurer’s cleft                                         | CC          | t                 | 0.000          |
| GO:0016021     | integral to membrane                                   | CC          | t                 | 0.000          |
| GO:0015934     | large ribosomal subunit                                | CC          | n-t               | 0.001          |
| GO:0005794     | Golgi apparatus                                        | CC          | n-t               | 0.005          |
| GO:0005739     | mitochondrion                                          | CC          | n-t               | 0.028          |
| GO:0005839     | proteasome core complex                                | CC          | n-t               | 0.084          |
| GO:0005829     | cytosol                                                | CC          | n-t               | 0.087          |
| GO:0003735     | structural constituent of ribosome                     | MF          | n-t               | 0.000          |
| GO:0004872     | receptor activity                                      | MF          | t                 | 0.000          |
| GO:0050839     | cell adhesion molecule binding                         | MF          | t                 | 0.000          |
| GO:0046789     | host cell surface receptor binding                     | MF          | t                 | 0.000          |
| GO:0005215     | transporter activity                                   | MF          | n-t               | 0.003          |
| GO:0003677     | DNA binding                                            | MF          | n-t               | 0.059          |
| GO:0005509     | calcium ion binding                                    | MF          | n-t               | 0.088          |
| GO:0020033     | antigenic variation                                    | BP          | t                 | 0.000          |
| GO:0009405     | pathogenesis                                           | BP          | t                 | 0.000          |
| GO:0016337     | cell-cell adhesion                                     | BP          | t                 | 0.000          |
| GO:0020035     | cytoadherence to microvasculature                      | BP          | t                 | 0.000          |
| GO:0020013     | modulation by symbiont of host erythrocyte aggregation | BP          | t                 | 0.000          |
| GO:0006412     | translation                                            | BP          | n-t               | 0.000          |
| GO:0045454     | cell redox homeostasis                                 | BP          | n-t               | 0.011          |
| GO:0006886     | intracellular protein transport                        | BP          | n-t               | 0.012          |
| GO:0006511     | ubiquitin-dependent protein catabolic process          | BP          | n-t               | 0.099          |

**Supplementary Table 10: GSEA results for the schizont stage on the first component of the kCCA.**

GSEA is applied to the ranked list of genes per projection on the kCCA component. For the *Enrichment* column, *t* denotes enrichment near the telomeres, and *n-t* denotes enrichment in non-telomeric regions. For the *Type* column CC denotes “Cellular Component”, MF denotes “Molecular Function” and BP denotes “Biological Process”. Enrichments with *q*-value < 0.1 are shown.

| <i>GO term</i> | <i>Description</i>                                     | <i>Type</i> | <i>Enrichment</i> | <i>q-value</i> |
|----------------|--------------------------------------------------------|-------------|-------------------|----------------|
| GO:0020030     | infected host cell surface knob                        | CC          | t                 | 0.000          |
| GO:0005840     | ribosome                                               | CC          | n-t               | 0.000          |
| GO:0005622     | intracellular                                          | CC          | n-t               | 0.000          |
| GO:0022627     | cytosolic small ribosomal subunit                      | CC          | n-t               | 0.000          |
| GO:0022625     | cytosolic large ribosomal subunit                      | CC          | n-t               | 0.000          |
| GO:0005783     | endoplasmic reticulum                                  | CC          | n-t               | 0.000          |
| GO:0015935     | small ribosomal subunit                                | CC          | n-t               | 0.000          |
| GO:0020036     | Maurer’s cleft                                         | CC          | t                 | 0.000          |
| GO:0020002     | host cell plasma membrane                              | CC          | t                 | 0.000          |
| GO:0015934     | large ribosomal subunit                                | CC          | n-t               | 0.001          |
| GO:0005789     | endoplasmic reticulum membrane                         | CC          | n-t               | 0.001          |
| GO:0005839     | proteasome core complex                                | CC          | n-t               | 0.002          |
| GO:0016021     | integral to membrane                                   | CC          | t                 | 0.003          |
| GO:0005794     | Golgi apparatus                                        | CC          | n-t               | 0.008          |
| GO:0005739     | mitochondrion                                          | CC          | n-t               | 0.026          |
| GO:0004872     | receptor activity                                      | MF          | t                 | 0.000          |
| GO:0050839     | cell adhesion molecule binding                         | MF          | t                 | 0.000          |
| GO:0046789     | host cell surface receptor binding                     | MF          | t                 | 0.000          |
| GO:0003735     | structural constituent of ribosome                     | MF          | n-t               | 0.000          |
| GO:0004175     | endopeptidase activity                                 | MF          | n-t               | 0.008          |
| GO:0005215     | transporter activity                                   | MF          | n-t               | 0.011          |
| GO:0003677     | DNA binding                                            | MF          | n-t               | 0.013          |
| GO:0004298     | threonine-type endopeptidase activity                  | MF          | n-t               | 0.015          |
| GO:0020033     | antigenic variation                                    | BP          | t                 | 0.000          |
| GO:0009405     | pathogenesis                                           | BP          | t                 | 0.000          |
| GO:0020013     | modulation by symbiont of host erythrocyte aggregation | BP          | t                 | 0.000          |
| GO:0020035     | cytoadherence to microvasculature                      | BP          | t                 | 0.000          |
| GO:0016337     | cell-cell adhesion                                     | BP          | t                 | 0.000          |
| GO:0006412     | translation                                            | BP          | n-t               | 0.000          |
| GO:0006511     | ubiquitin-dependent protein catabolic process          | BP          | n-t               | 0.002          |
| GO:0006886     | intracellular protein transport                        | BP          | n-t               | 0.003          |
| GO:0045454     | cell redox homeostasis                                 | BP          | n-t               | 0.016          |
| GO:0007264     | small GTPase mediated signal transduction              | BP          | n-t               | 0.017          |
| GO:0006260     | DNA replication                                        | BP          | n-t               | 0.028          |
| GO:0015031     | protein transport                                      | BP          | n-t               | 0.043          |
| GO:0006281     | DNA repair                                             | BP          | n-t               | 0.091          |
| GO:0016192     | vesicle-mediated transport                             | BP          | n-t               | 0.091          |



**Supplementary Table 11: kCCA enrichment of 15 expression clusters.**

GSEA is applied to the ranked list of genes per projection on the first and second kCCA components (*Comp*), relative to 15 expression clusters defined by Le Roch et al. [7] (*Cluster*). For the enrichment column (*Enr.*), *t* refers to an enrichment in telomeric regions, *n-t* to an enrichment in non-telomeric regions, *c* to enrichment in the centromeric regions, and *n-c* to enrichment in non-centromeric regions. Enrichments with q-values < 0.05 are shaded grey.

| <i>Comp</i> | <i>Cluster</i> | <i>Ring</i>    |             | <i>Trophozoite</i> |             | <i>Schizont</i> |             |
|-------------|----------------|----------------|-------------|--------------------|-------------|-----------------|-------------|
|             |                | <i>q-value</i> | <i>Enr.</i> | <i>q-value</i>     | <i>Enr.</i> | <i>q-value</i>  | <i>Enr.</i> |
| 1           | 1              | 0.000          | n-t         | 0.000              | n-t         | 0.000           | n-t         |
|             | 2              | 0.358          | n-t         | 0.730              | n-t         | 0.667           | n-t         |
|             | 3              | 0.000          | t           | 0.000              | t           | 0.000           | t           |
|             | 4              | 0.000          | n-t         | 0.000              | n-t         | 0.000           | n-t         |
|             | 5              | 0.482          | t           | 0.216              | t           | 0.997           | t           |
|             | 6              | 0.000          | t           | 0.003              | t           | 0.003           | t           |
|             | 7              | 0.036          | t           | 0.818              | n-t         | 1.000           | n-t         |
|             | 8              | 0.759          | n-t         | 0.897              | n-t         | 0.819           | n-t         |
|             | 9              | 0.000          | t           | 0.000              | t           | 0.000           | t           |
|             | 10             | 0.000          | t           | 0.000              | t           | 0.000           | t           |
|             | 11             | 0.011          | t           | 0.000              | t           | 0.000           | t           |
|             | 12             | 0.000          | t           | 0.000              | t           | 0.000           | t           |
|             | 13             | 0.000          | t           | 0.000              | t           | 0.000           | t           |
|             | 14             | 0.000          | t           | 0.000              | t           | 0.000           | t           |
|             | 15             | 0.230          | n-t         | 0.703              | n-t         | 0.924           | n-t         |
| 2           | 1              | 0.000          | n-c         | 0.000              | n-c         | 0.000           | n-c         |
|             | 2              | 0.006          | n-c         | 0.002              | n-c         | 0.005           | n-c         |
|             | 3              | 0.000          | c           | 0.000              | c           | 0.000           | c           |
|             | 4              | 0.000          | c           | 0.000              | c           | 0.000           | c           |
|             | 5              | 0.686          | c           | 1.000              | c           | 0.980           | n-c         |
|             | 6              | 0.838          | c           | 1.000              | c           | 0.999           | c           |
|             | 7              | 0.000          | c           | 0.000              | c           | 0.000           | c           |
|             | 8              | 0.956          | n-c         | 1.000              | c           | 1.000           | n-c         |
|             | 9              | 0.004          | c           | 0.000              | c           | 0.000           | c           |
|             | 10             | 0.071          | n-c         | 0.996              | c           | 1.000           | n-c         |
|             | 11             | 0.000          | n-c         | 0.000              | n-c         | 0.000           | n-c         |
|             | 12             | 0.000          | n-c         | 0.000              | n-c         | 0.000           | n-c         |
|             | 13             | 0.000          | n-c         | 0.000              | n-c         | 0.002           | n-c         |
|             | 14             | 0.000          | n-c         | 0.000              | n-c         | 0.000           | n-c         |
|             | 15             | 0.000          | n-c         | 0.000              | n-c         | 0.000           | n-c         |

**Supplementary Table 12: GSEA results for the second component of the kCCA.**

GSEA is applied to the ranked list of genes per projection on the kCCA component. For the *Enrichment* column, *c* denotes enrichment near the centromeres, *n-c* denotes enrichment in non centromeric regions. For the *Type* column CC denotes “Cellular Component”, MF denotes “Molecular Function” and BP denotes “Biological Process”. Enrichments with *q*-value < 0.1 are shown.

| <i>Stage</i> | <i>GO term</i> | <i>Description</i>                    | <i>Type</i> | <i>Enrichment</i> | <i>q-value</i> |
|--------------|----------------|---------------------------------------|-------------|-------------------|----------------|
| Ring         | GO:0020008     | rhoptry                               | CC          | n-c               | 0.014          |
|              | GO:0016459     | myosin complex                        | CC          | n-c               | 0.020          |
|              | GO:0005839     | proteasome core complex               | CC          | n-c               | 0.031          |
|              | GO:0008234     | cysteine-type peptidase activity      | MF          | n-c               | 0.001          |
|              | GO:0004713     | protein tyrosine kinase activity      | MF          | n-c               | 0.007          |
|              | GO:0003779     | actin binding                         | MF          | n-c               | 0.009          |
|              | GO:0004175     | endopeptidase activity                | MF          | n-c               | 0.015          |
|              | GO:0004298     | threonine-type endopeptidase activity | MF          | n-c               | 0.018          |
|              | GO:0003774     | motor activity                        | MF          | n-c               | 0.035          |
|              | GO:0005516     | calmodulin binding                    | MF          | n-c               | 0.039          |
|              | GO:0016255     | attachment of GPI anchor to protein   | BP          | n-c               | 0.066          |
| Trophozoite  | GO:0005839     | proteasome core complex               | CC          | n-c               | 0.033          |
|              | GO:0020008     | rhoptry                               | CC          | n-c               | 0.058          |
|              | GO:0016459     | myosin complex                        | CC          | n-c               | 0.084          |
|              | GO:0008234     | cysteine-type peptidase activity      | MF          | n-c               | 0.000          |
|              | GO:0004175     | endopeptidase activity                | MF          | n-c               | 0.028          |
|              | GO:0004713     | protein tyrosine kinase activity      | MF          | n-c               | 0.029          |
|              | GO:0004298     | threonine-type endopeptidase activity | MF          | n-c               | 0.029          |
|              | GO:0003779     | actin binding                         | MF          | n-c               | 0.048          |
|              | GO:0003774     | motor activity                        | MF          | n-c               | 0.090          |
|              | GO:0005516     | calmodulin binding                    | MF          | n-c               | 0.093          |
|              | GO:0016740     | transferase activity                  | MF          | n-c               | 0.099          |
|              | GO:0016255     | attachment of GPI anchor to protein   | BP          | n-c               | 0.036          |
| Schizont     | GO:0005839     | proteasome core complex               | CC          | n-c               | 0.026          |
|              | GO:0020008     | rhoptry                               | CC          | n-c               | 0.044          |
|              | GO:0016459     | myosin complex                        | CC          | n-c               | 0.083          |
|              | GO:0008234     | cysteine-type peptidase activity      | MF          | n-c               | 0.000          |
|              | GO:0004175     | endopeptidase activity                | MF          | n-c               | 0.013          |
|              | GO:0004298     | threonine-type endopeptidase activity | MF          | n-c               | 0.018          |
|              | GO:0004713     | protein tyrosine kinase activity      | MF          | n-c               | 0.019          |
|              | GO:0003779     | actin binding                         | MF          | n-c               | 0.053          |

**Supplementary Table 13: Density score for varying values of  $\beta$  parameter at different stages.**

For each stage the  $\beta$  value that yields the minimal density score (shown in boldface) is used for three-dimensional modeling.

| <i>Stage</i> | $\beta = 0.4$ | $\beta = 0.45$ | $\beta = 0.5$ | $\beta = 0.55$ | $\beta = 0.6$ |
|--------------|---------------|----------------|---------------|----------------|---------------|
| Ring         | 0.109         | 0.077          | <b>0.057</b>  | 0.063          | 0.110         |
| Trophozoite  | 0.127         | 0.087          | 0.048         | <b>0.044</b>   | 0.540         |
| Schizont     | 0.051         | <b>0.048</b>   | 0.128         | 0.313          | 0.591         |

## Supplementary Figures

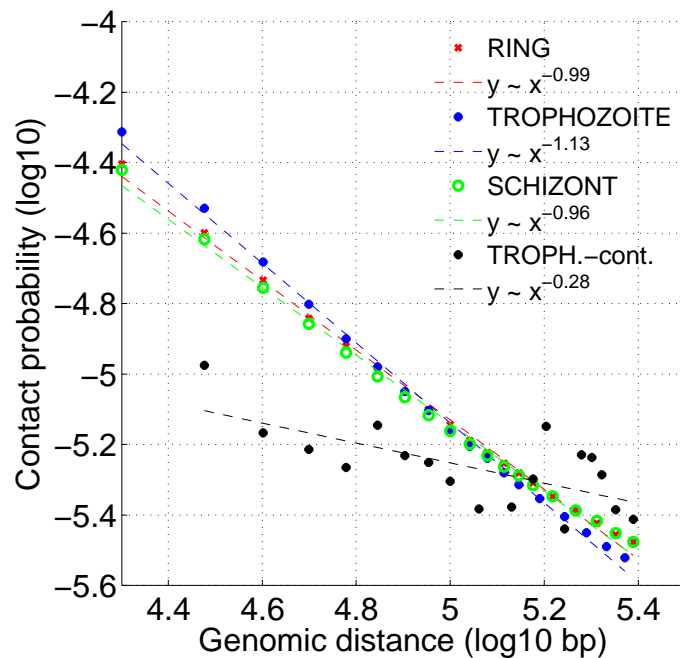

(a)

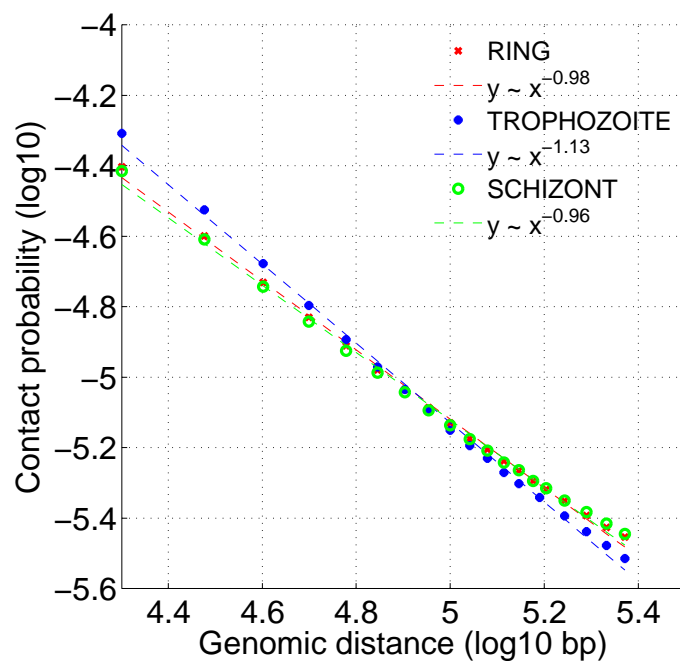

(b)

**Supplementary Figure 1: Power-law fits to 10 kb aggregated data.**

A power law of the form  $P(s) \sim s^\alpha$  is fit to the intrachromosomal contact probability  $P(s)$  as a function of genomic distance  $s$  for each stage (Methods). These log-linear fits are visualized by dashed lines and the corresponding gradient ( $\alpha$ ) values are reported in the legend for (a) raw and (b) normalized Hi-C contact maps at 10 kb resolution.

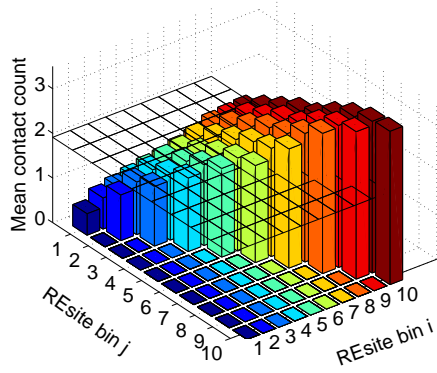

(a) Before normalization - No. of RE cut sites

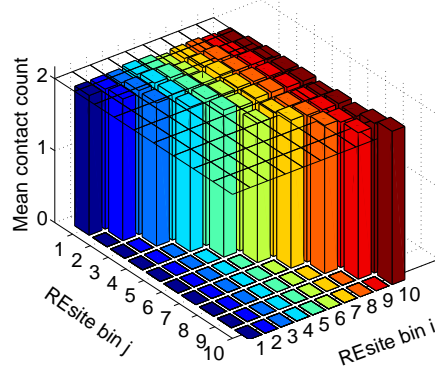

(b) After normalization - No. of RE cut sites

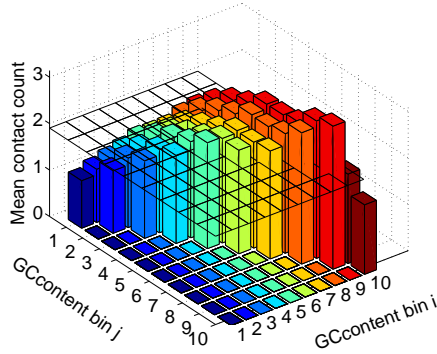

(c) Before normalization - Mappability

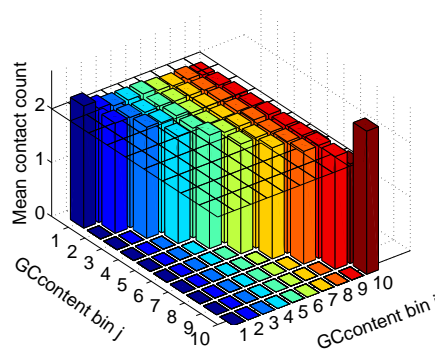

(d) After normalization - Mappability

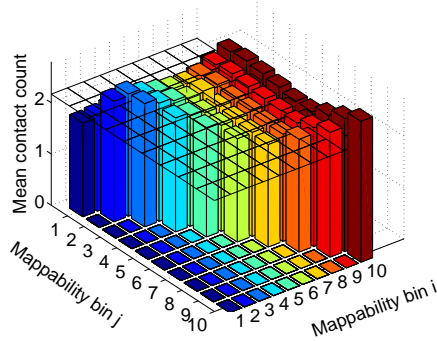

(e) Before normalization - GC content

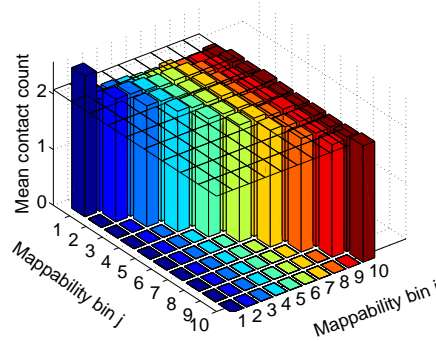

(f) After normalization - GC content

### Supplementary Figure 2: Biases in raw and corrected contact maps for ring stage.

For each non-overlapping 10 kb window in the genome we compute a genomic feature such as the number of restriction enzyme (RE) cut sites, the fraction of uniquely mappable bases and GC content. For each feature, we group all windows into 10 equal sized bins based on the feature value. Each possible locus pair belongs to one specific bin pair (2D bin) which is indexed by the two horizontal axes. For each 2D bin we compute the mean contact count using all locus pairs that fall into that bin. The black, horizontal grid plane corresponds to the overall mean. For perfectly unbiased data all vertical bars will be of equal height and equal to the overall mean. (a, c, e) and (b, d, f) plots show biases for each indicated feature before and after normalization, respectively. Plots for trophozoite and schizont stages are similar (data not shown).

### **Supplementary Figure 3: Chromosome visualizations.**

In the following fourteen pages, each page of figures corresponds to one chromosome, with the three time points (ring, trophozoite, schizont) arranged in three columns. Within each column, the top panels show the 10kb resolution contact count matrix after normalization using ICE [8], the  $p$ -values assigned to contacts, and the pairwise Euclidean distances derived from the 3D model. Within each matrix, clusters of VSRM genes are indicated with yellow boxes, and centromere locations are indicated with blue dotted lines. The fourth panel in each column illustrates the eigenvalue analysis, with compartment boundaries aggregated over the three stages (Methods) indicated by black dotted lines. The bottom panel shows the chromosome's inferred configuration in 3D with light blue spheres indicating centomeres, white spheres indicating telomeres and green spheres indicating midpoints of VSRM gene clusters.

# Chromosome 1

Rings

Trophozoites

Schizonts

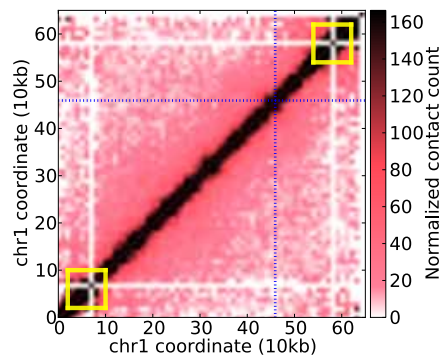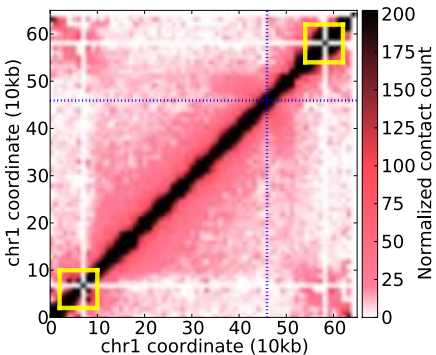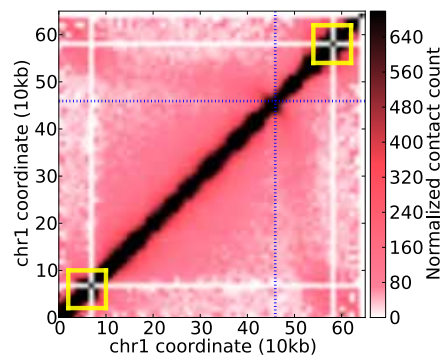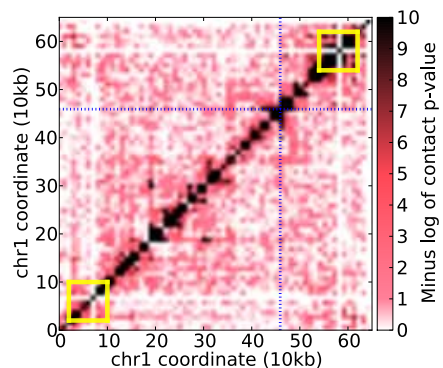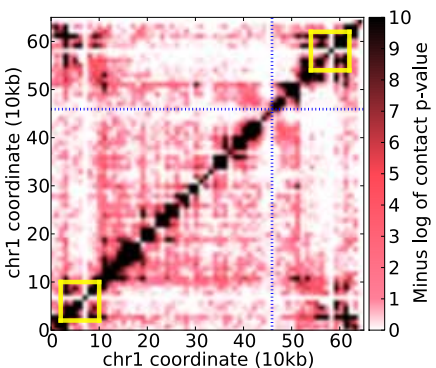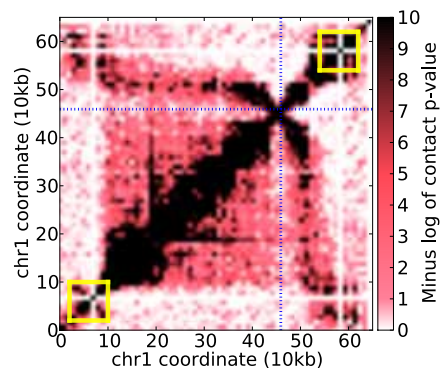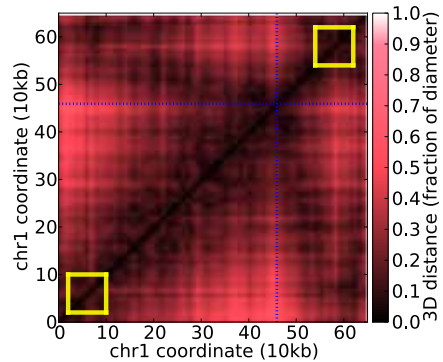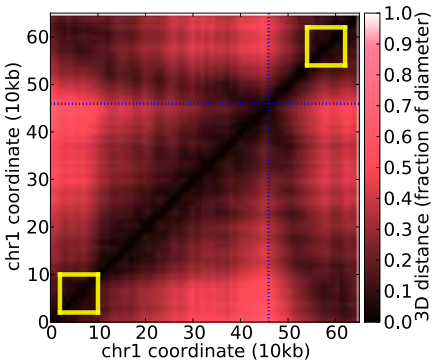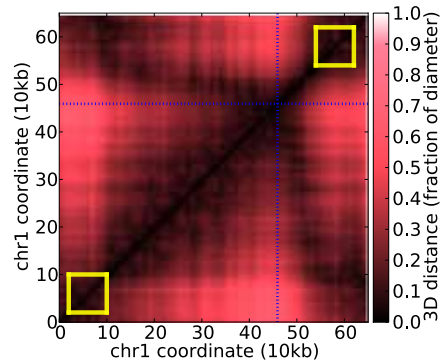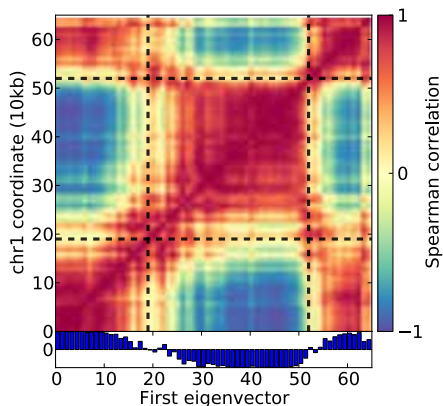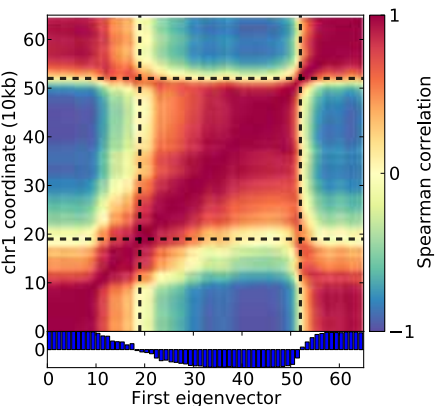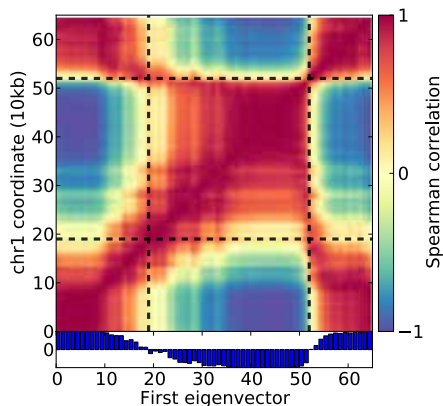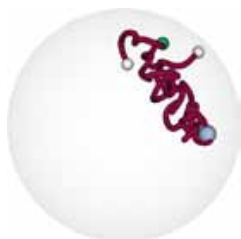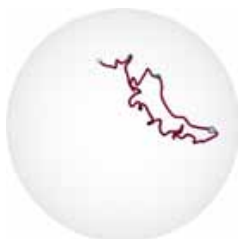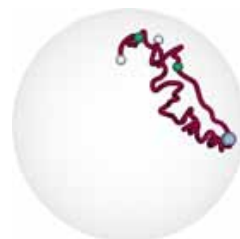

(a) Chromosome 1



## Chromosome 2

Rings

Trophozoites

Schizonts

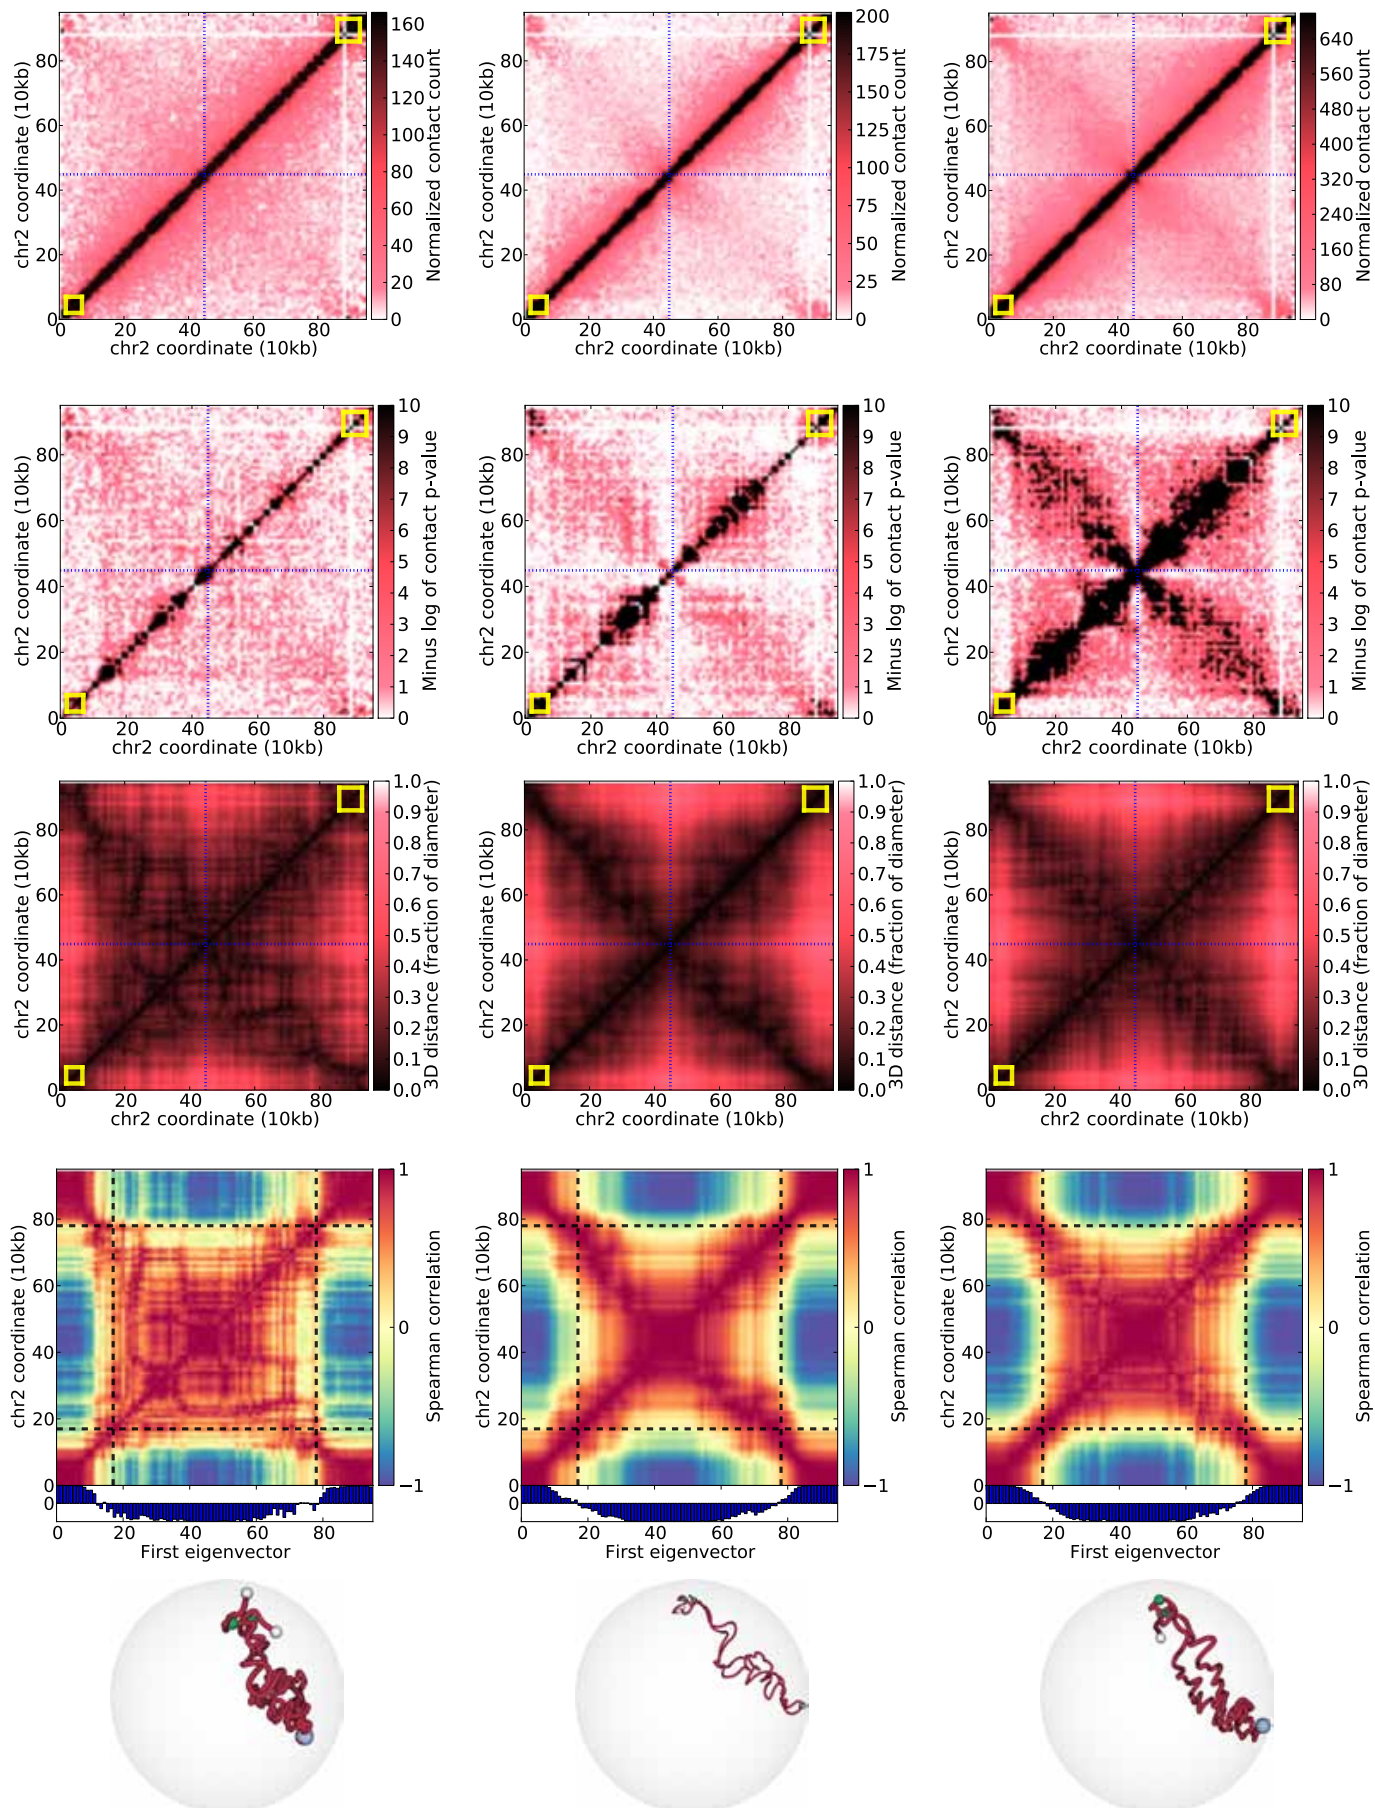

(b) Chromosome 2



### Chromosome 3

Rings

Trophozoites

Schizonts

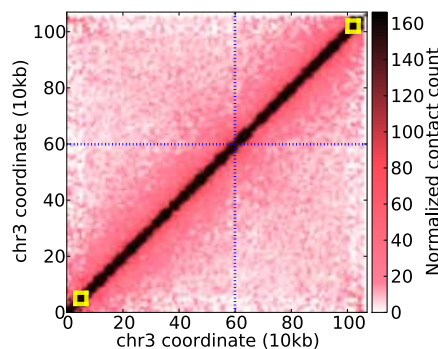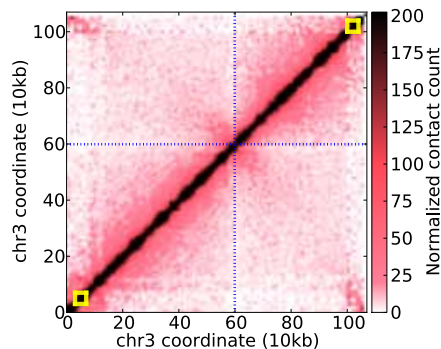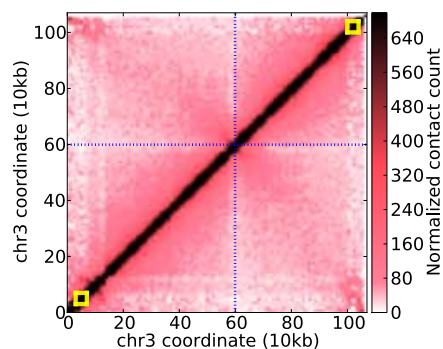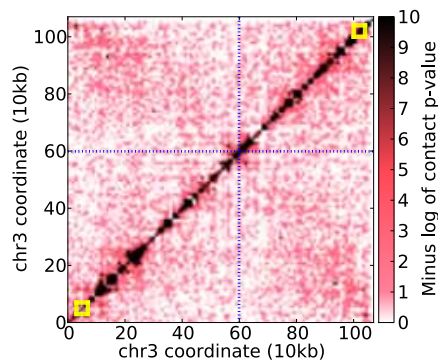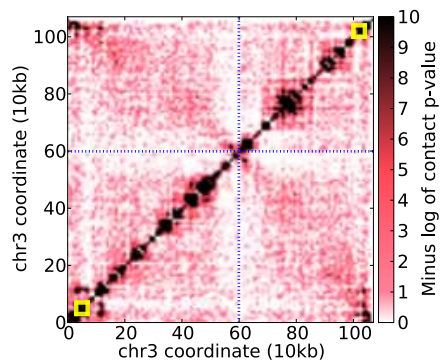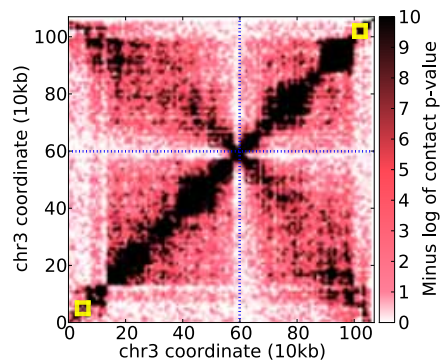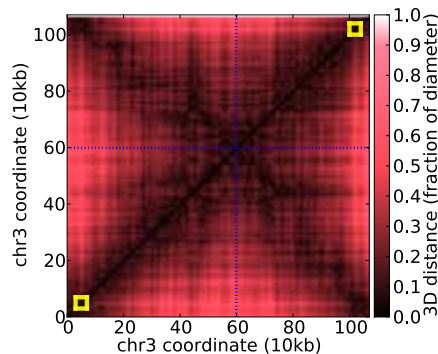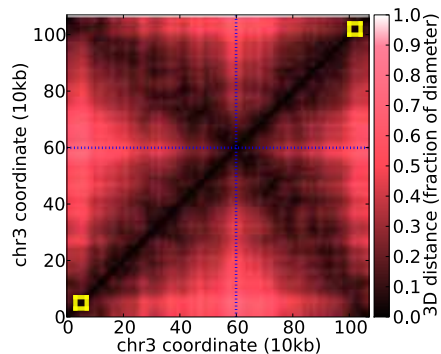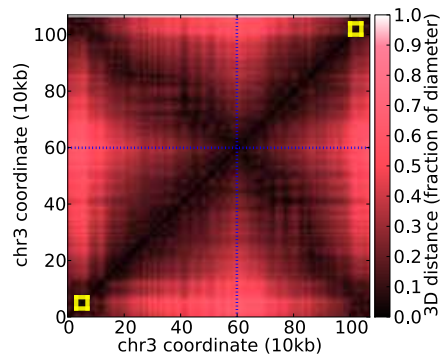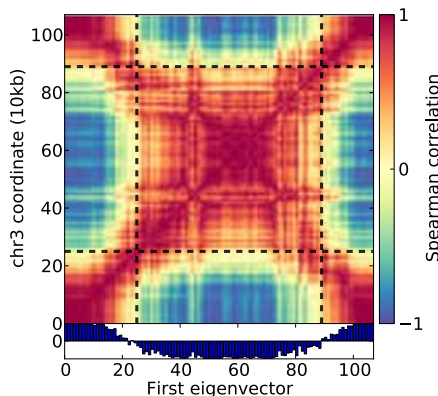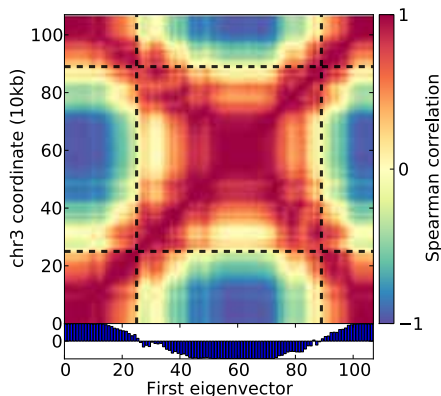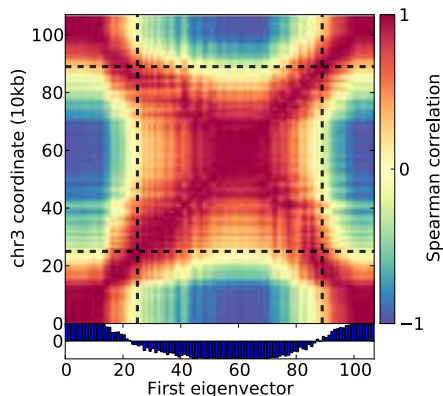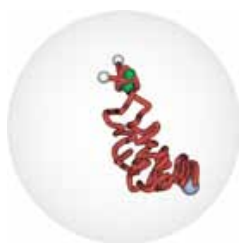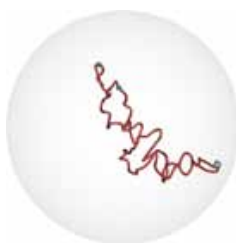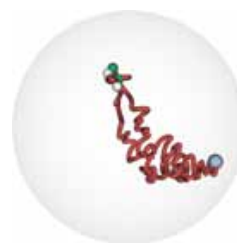

# Chromosome 4

## Rings

## Trophozoites

## Schizonts

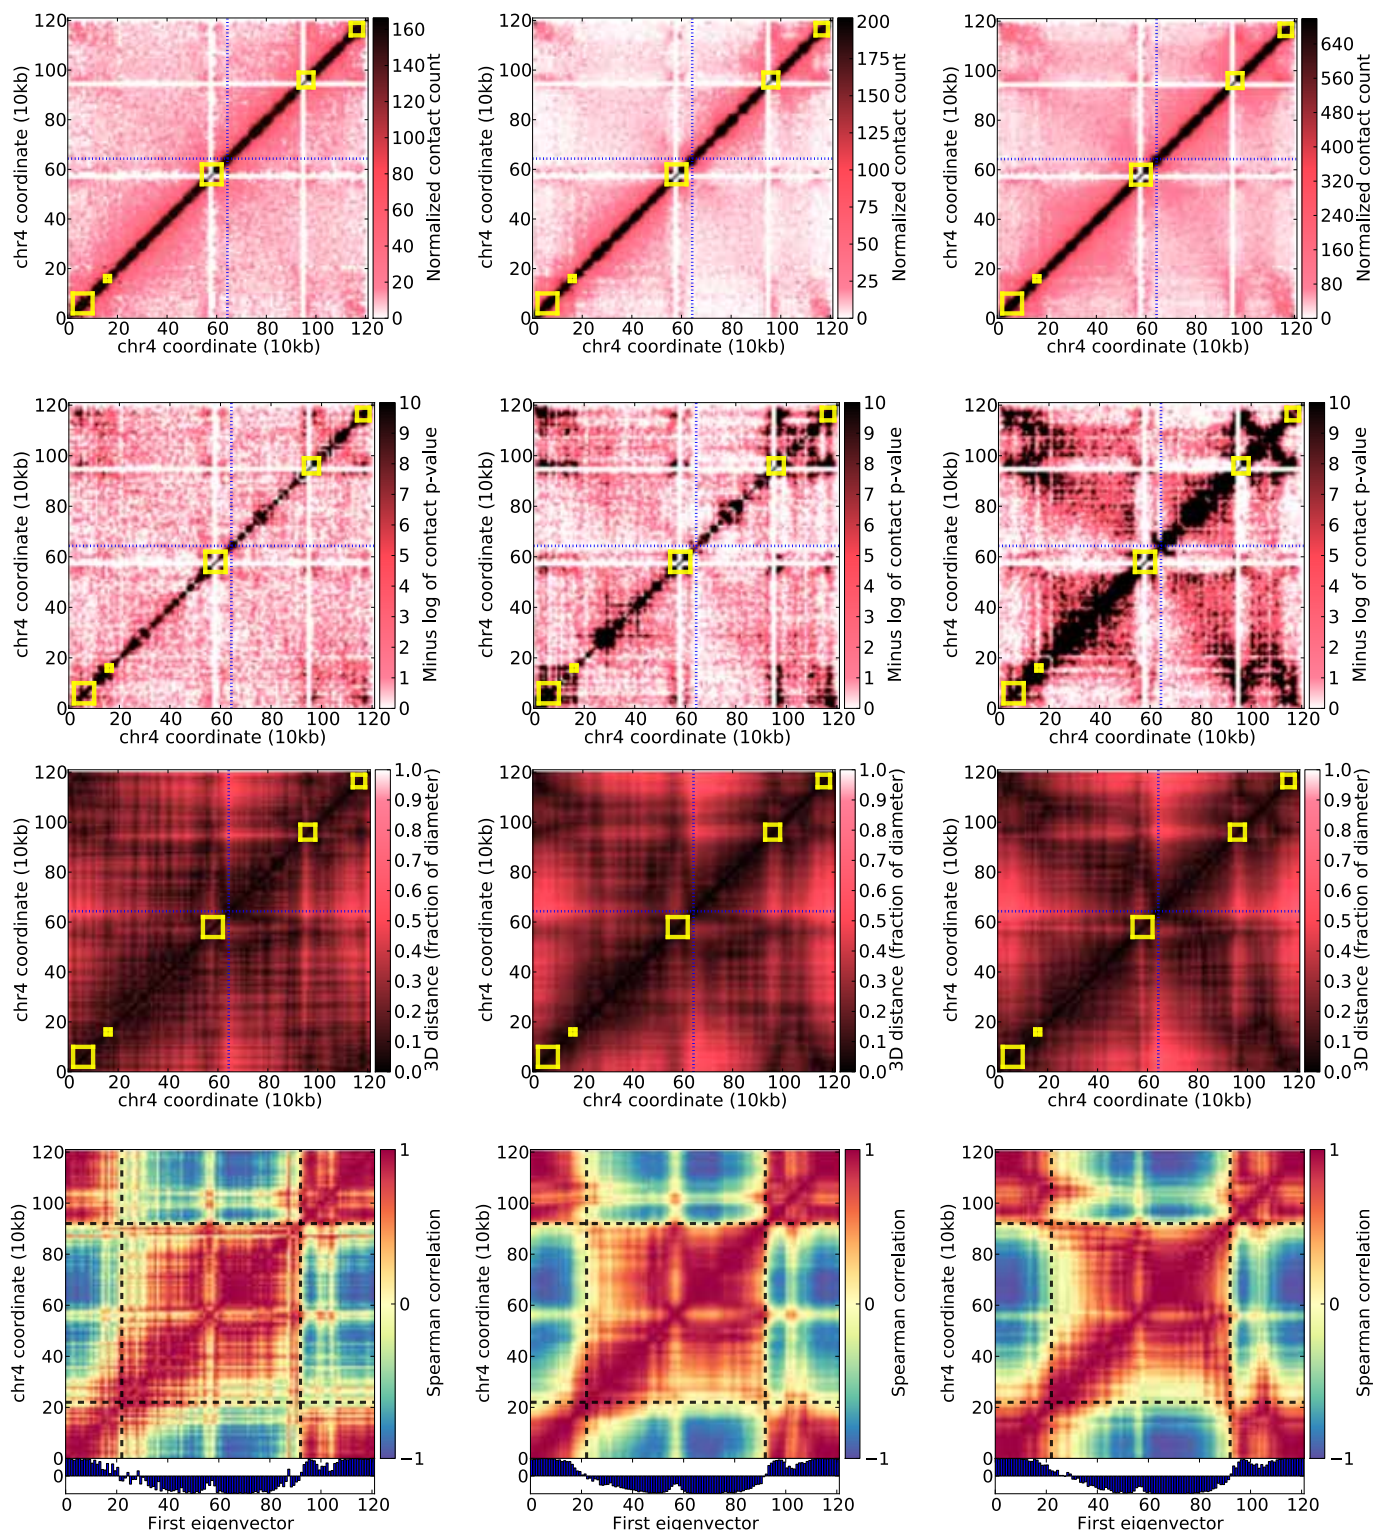



# Chromosome 5

## Rings

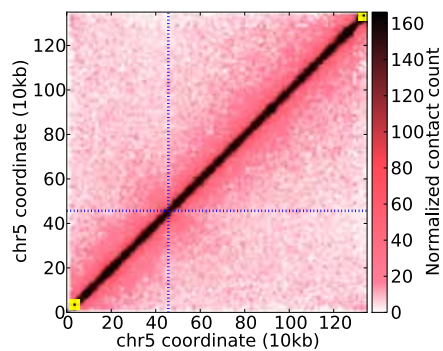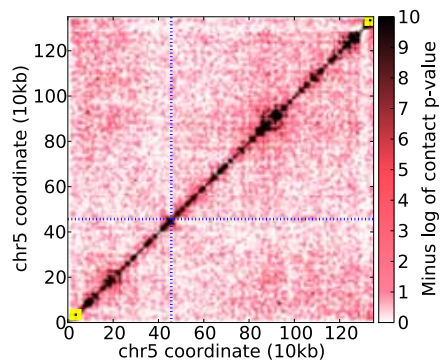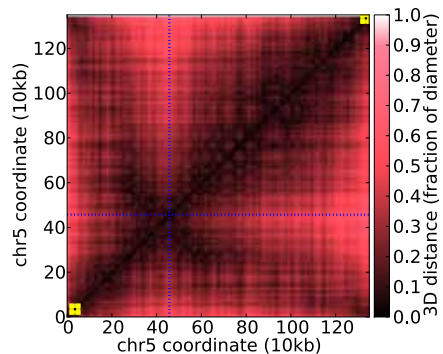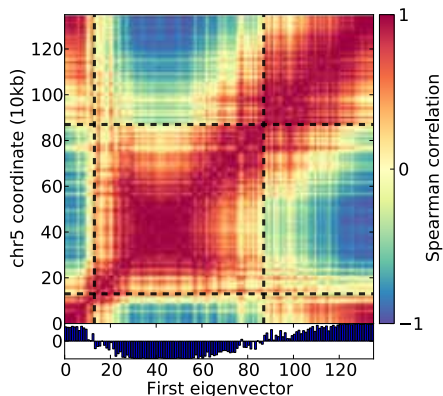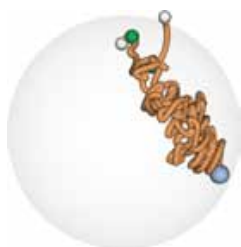

## Trophozoites

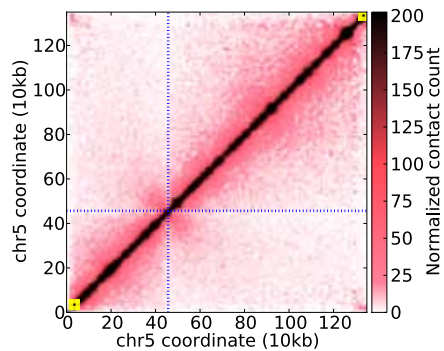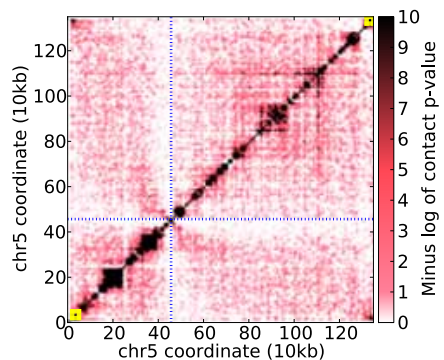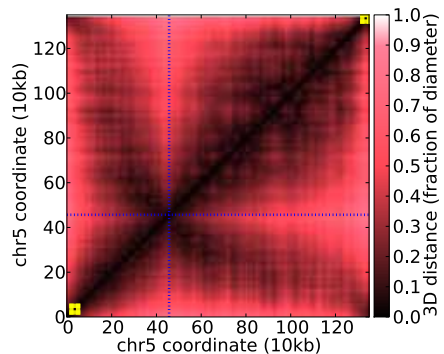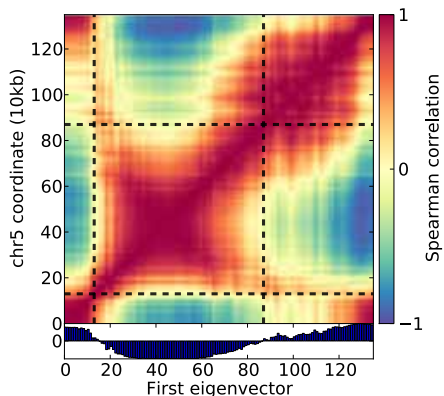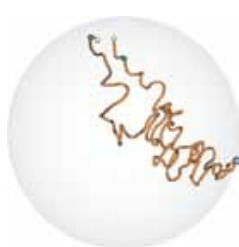

## Schizonts

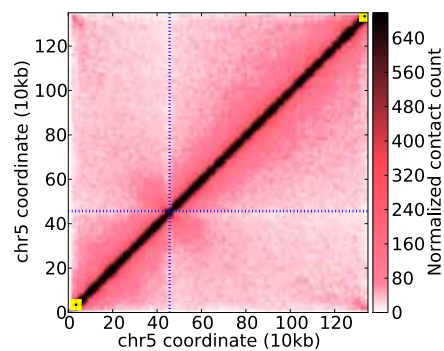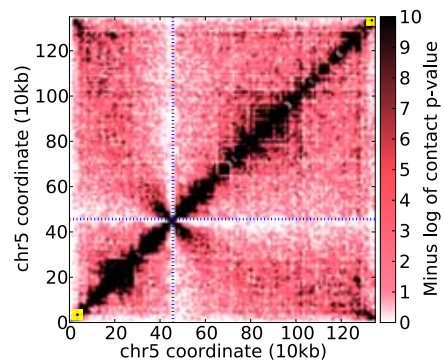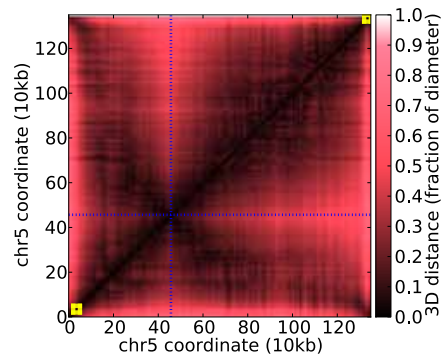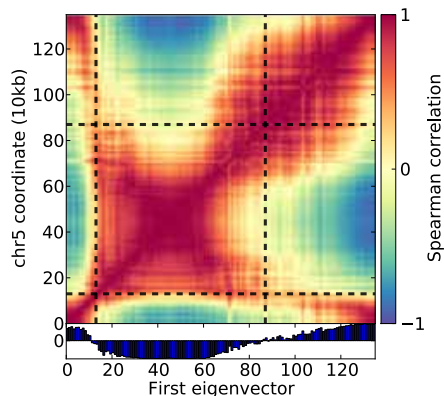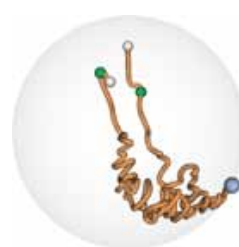

## Chromosome 6

### Rings

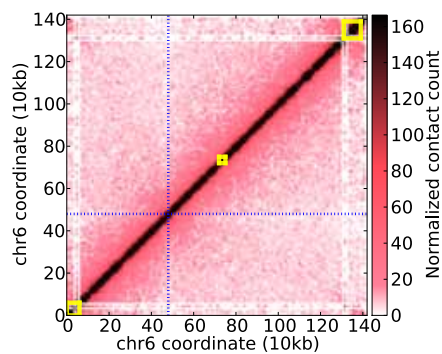

### Trophozoites

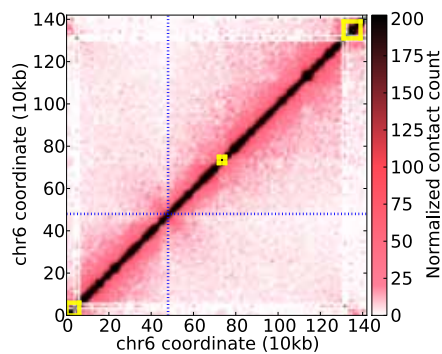

### Schizonts

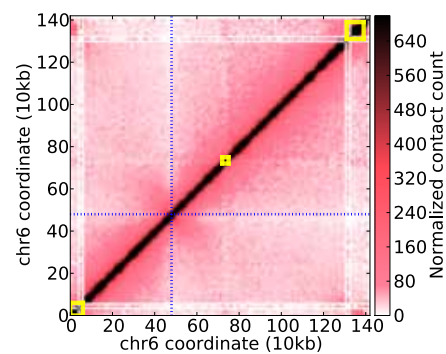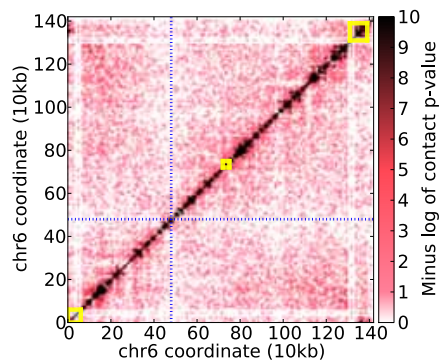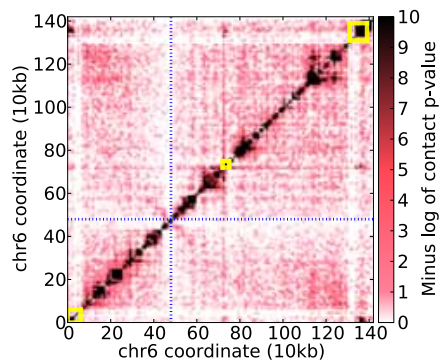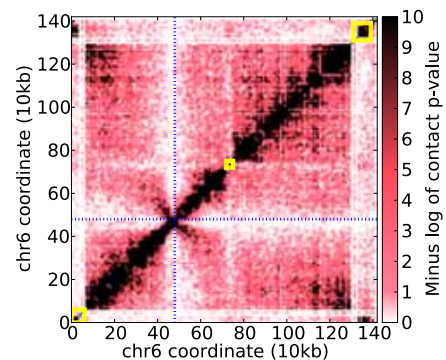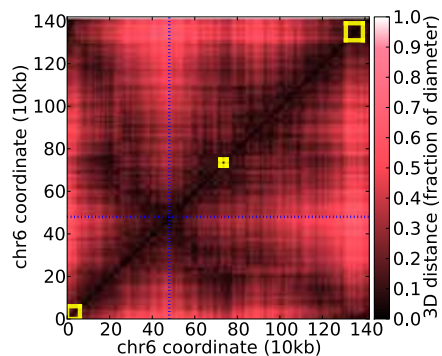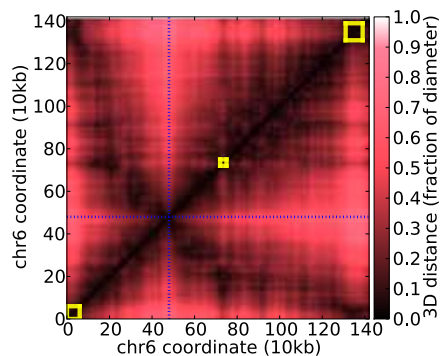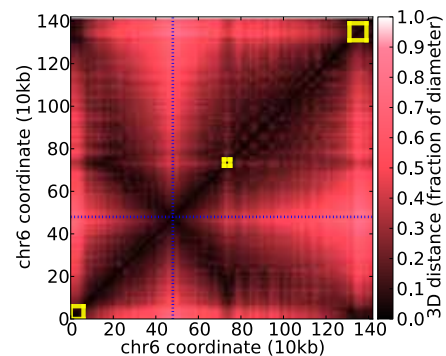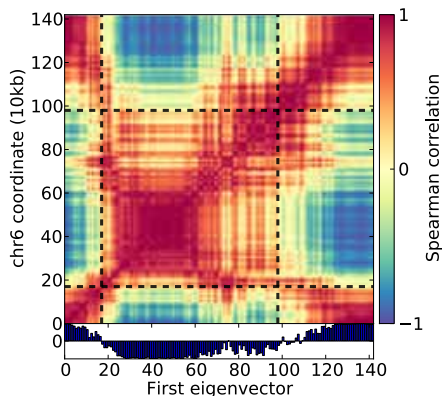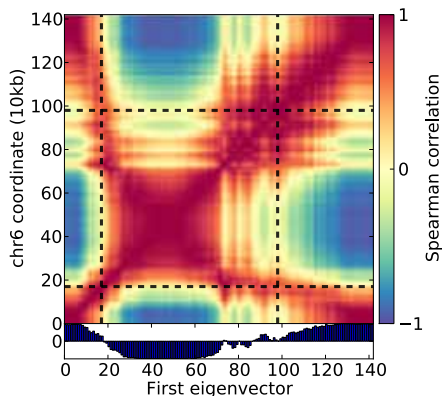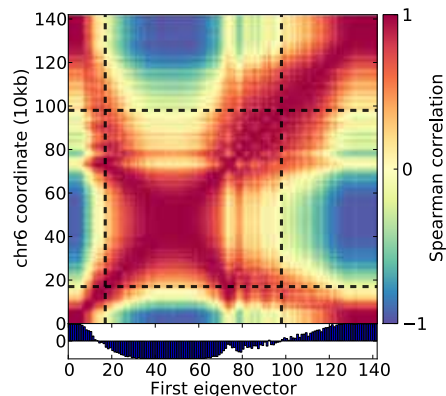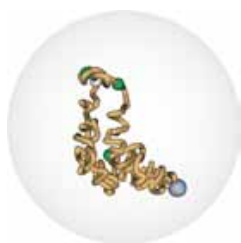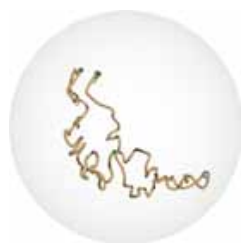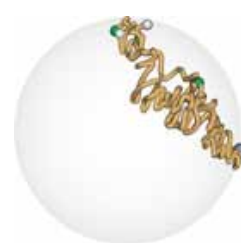



# Chromosome 7

## Rings

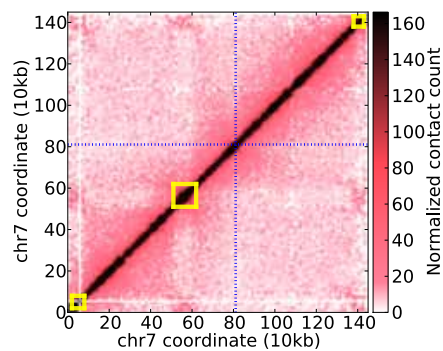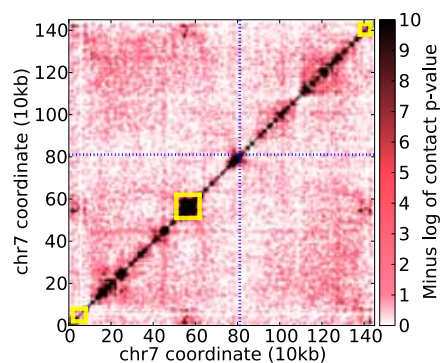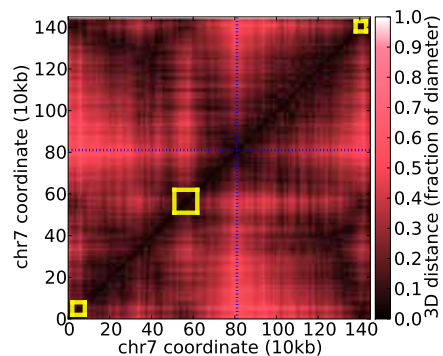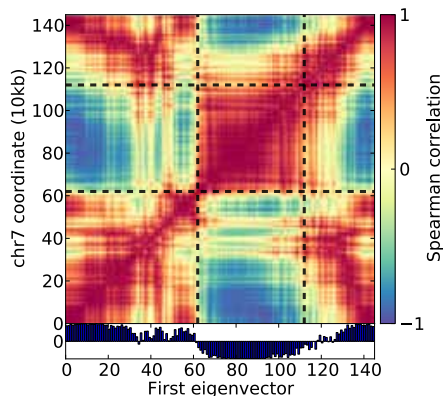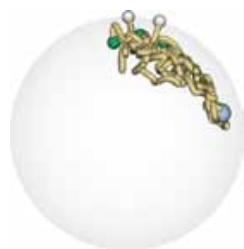

## Trophozoites

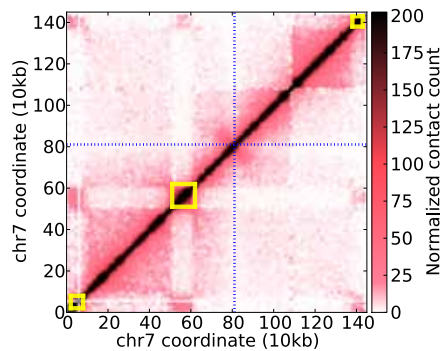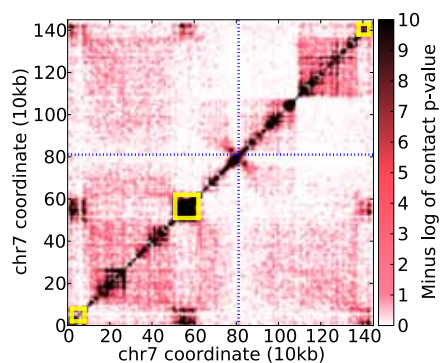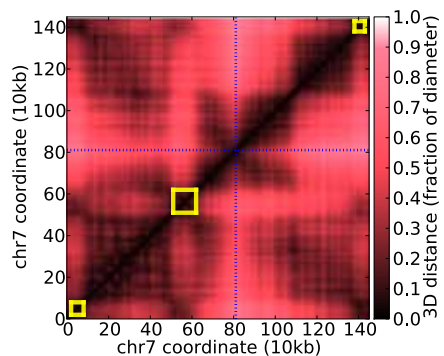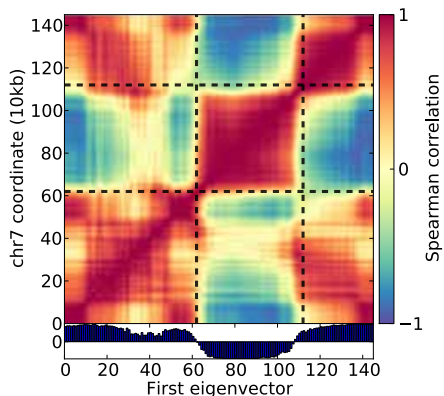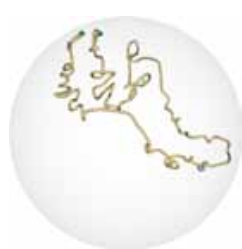

## Schizonts

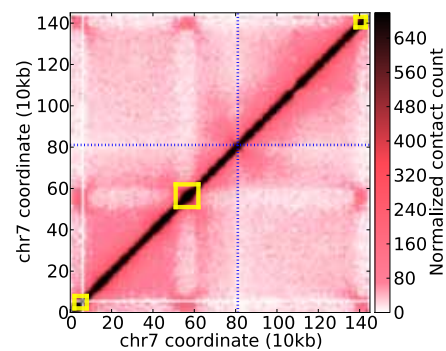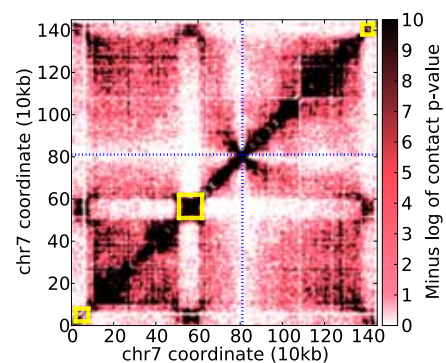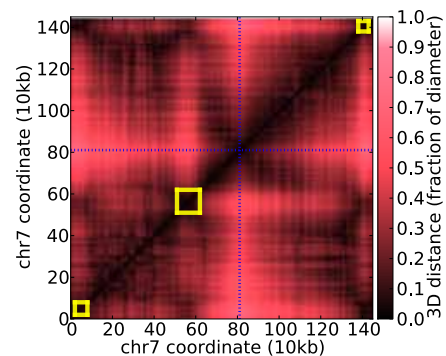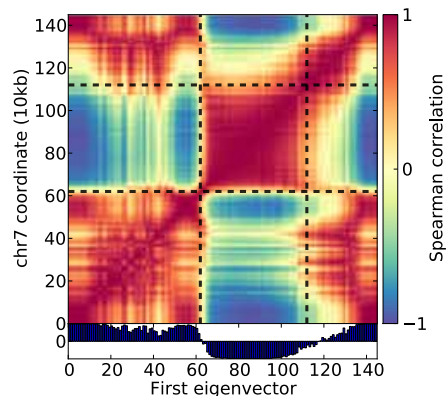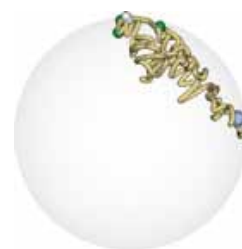

# Chromosome 8

## Rings

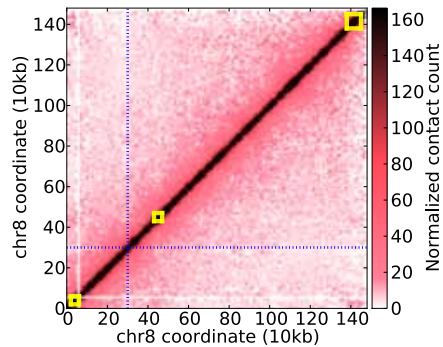

## Trophozoites

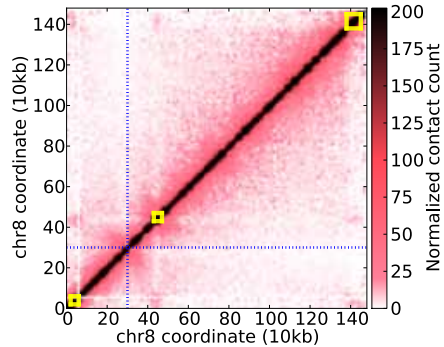

## Schizonts

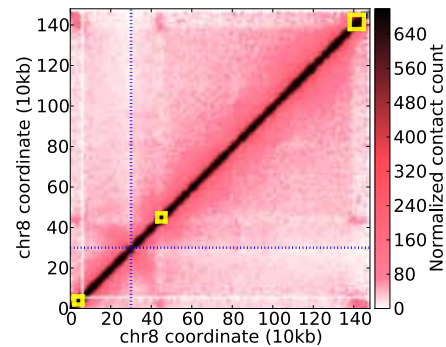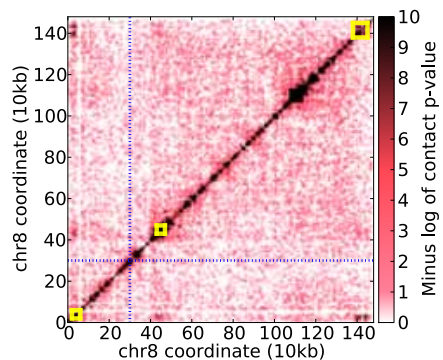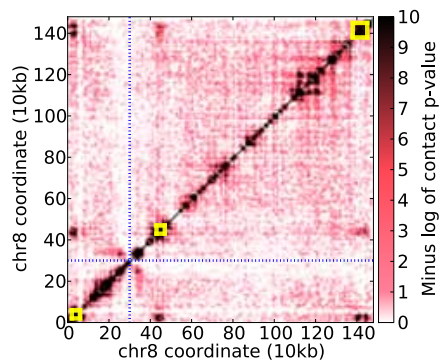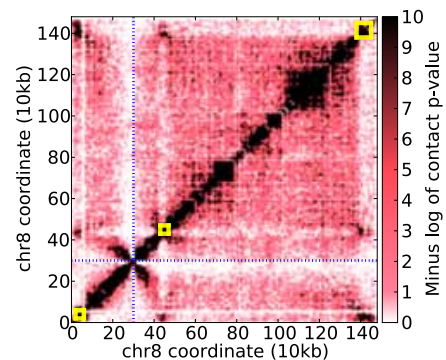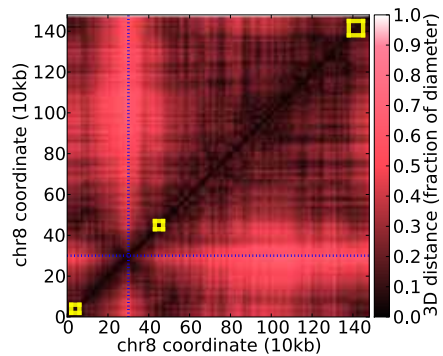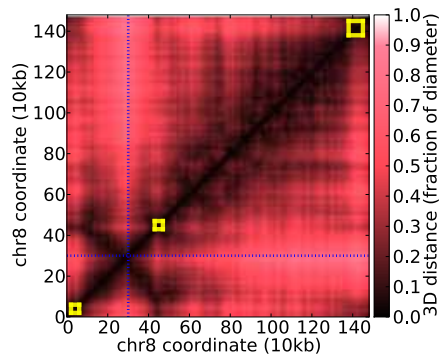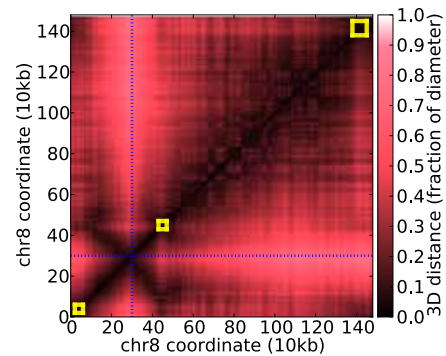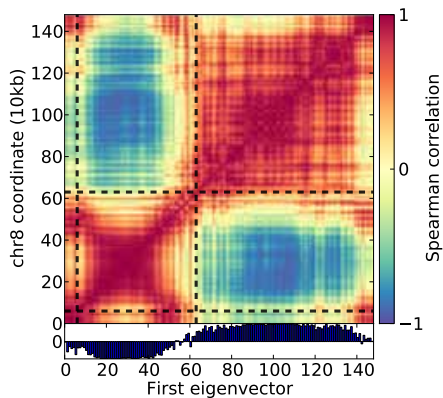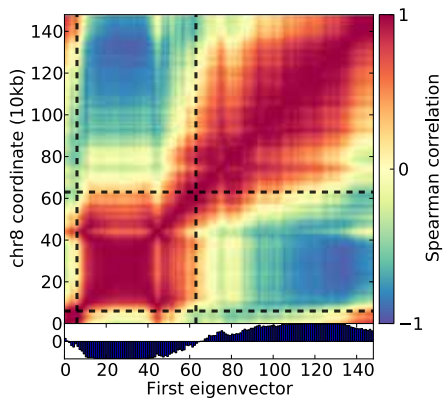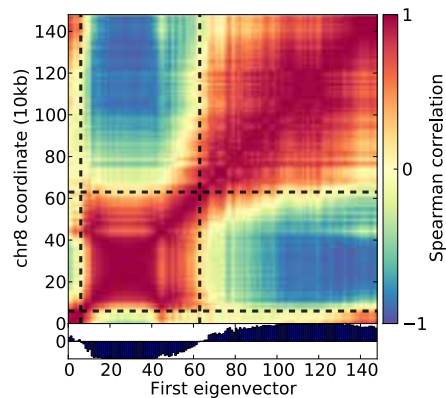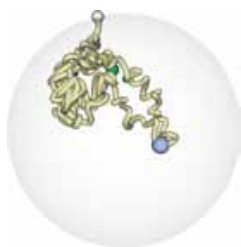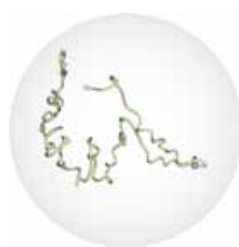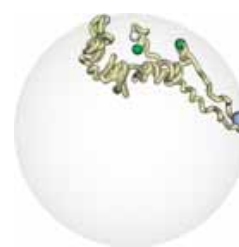



# Chromosome 9

## Rings

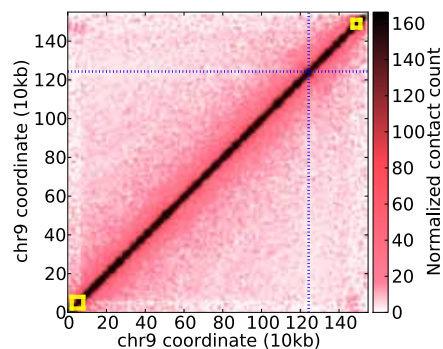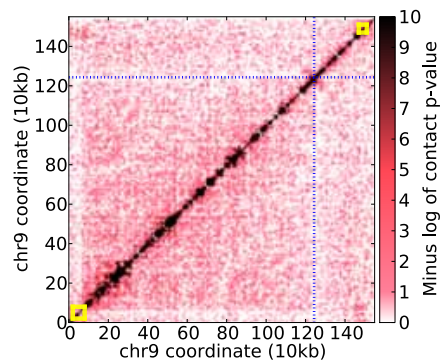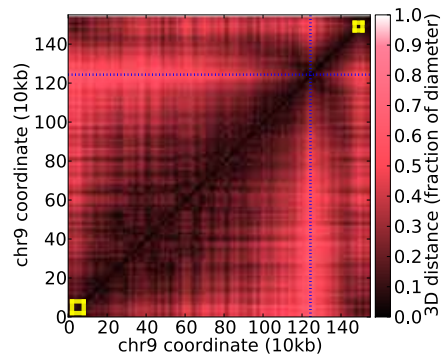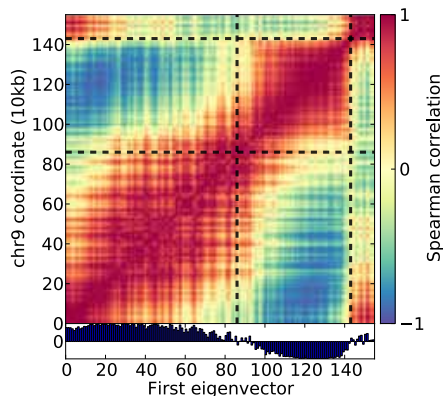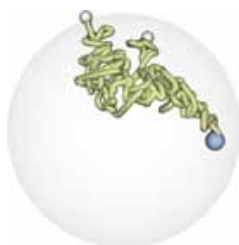

## Trophozoites

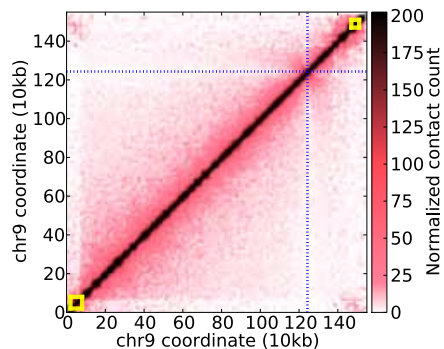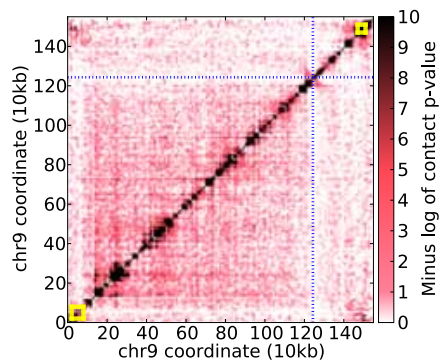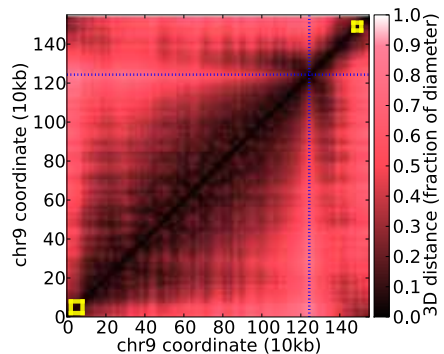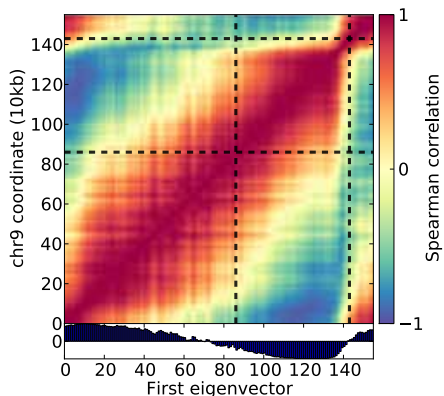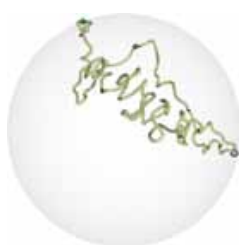

## Schizonts

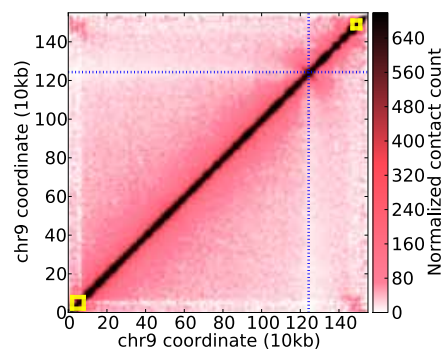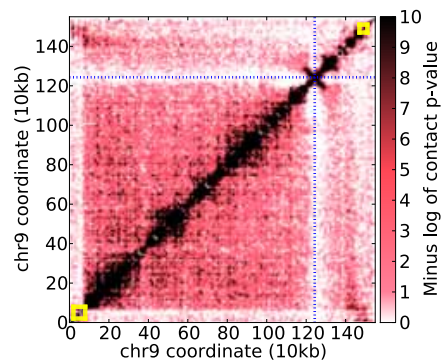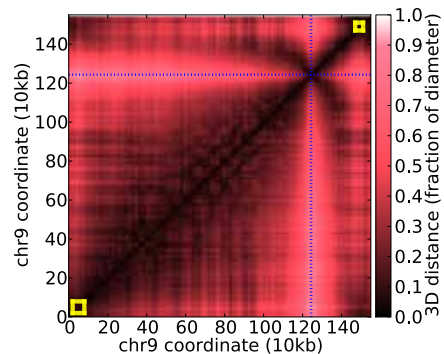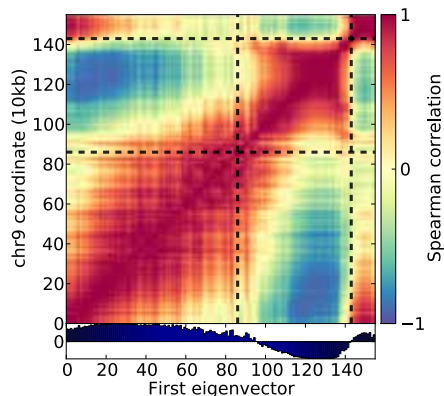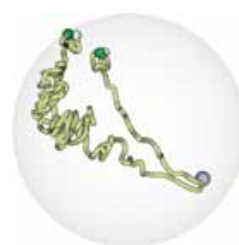



## Chromosome 10

### Rings

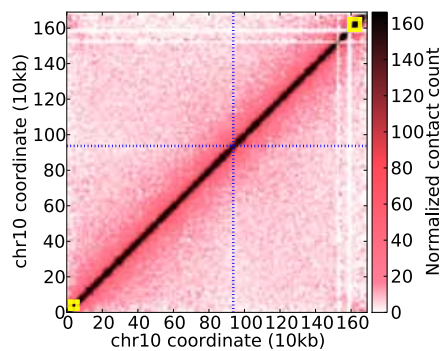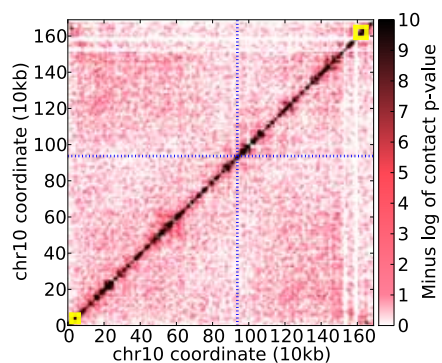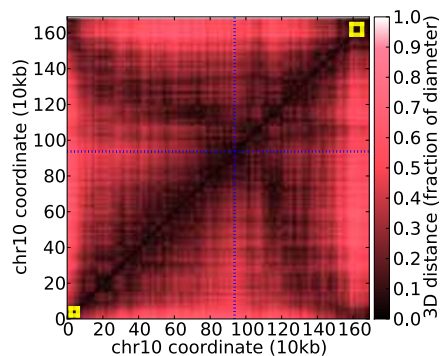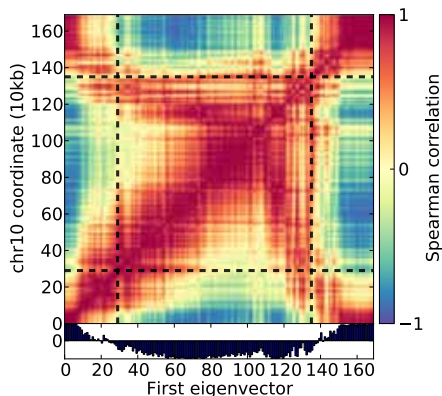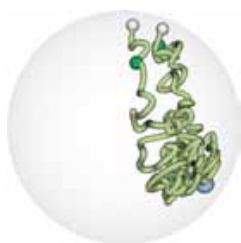

### Trophozoites

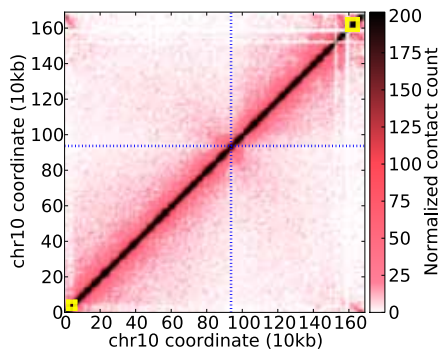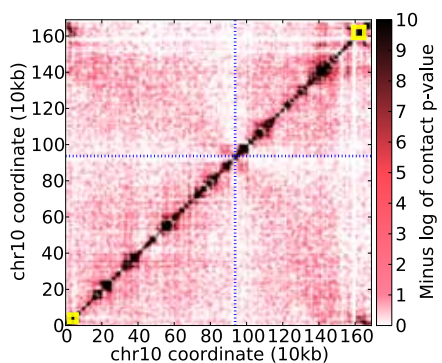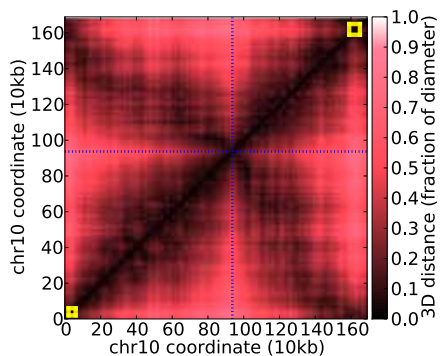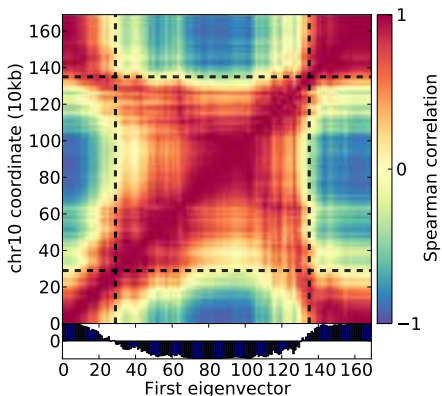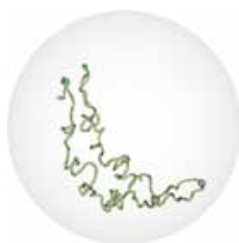

### Schizonts

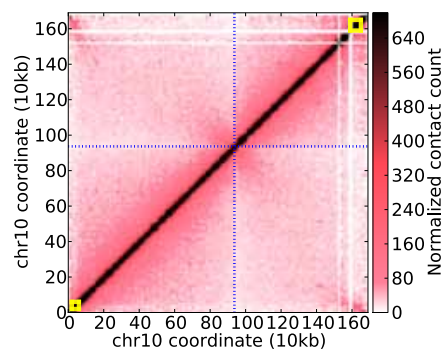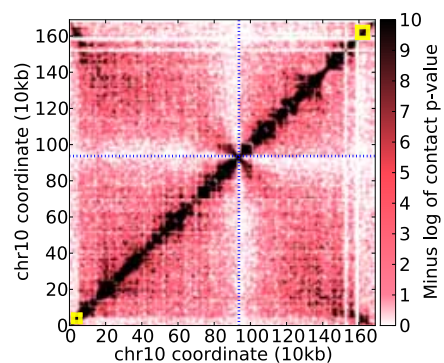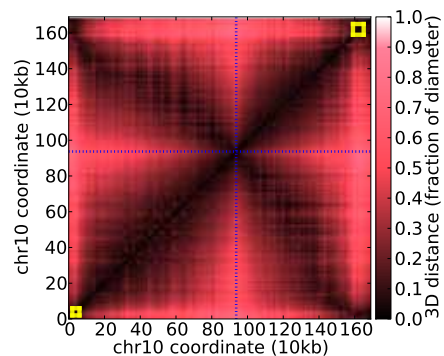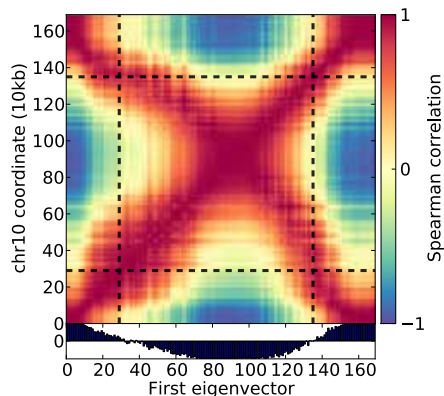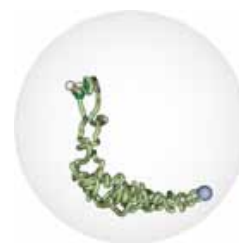



## Chromosome 11

### Rings

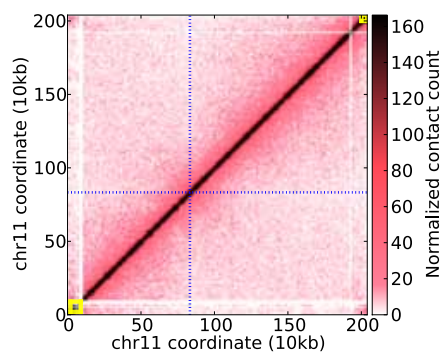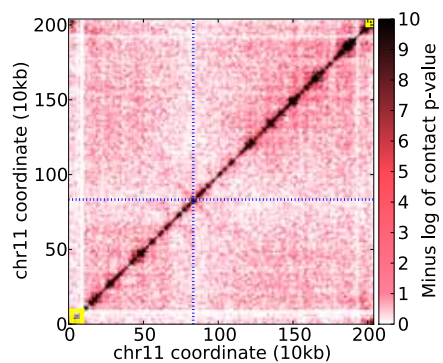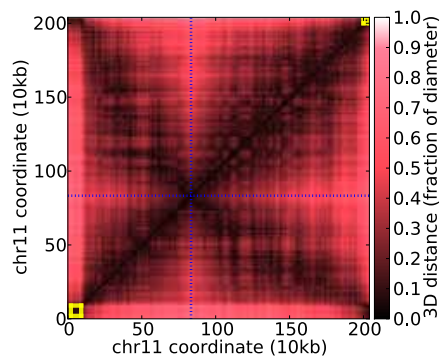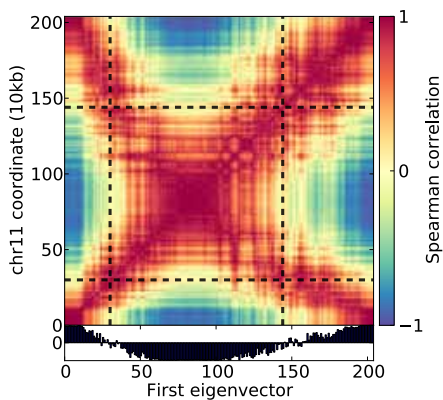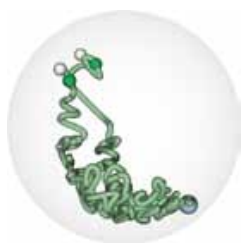

### Trophozoites

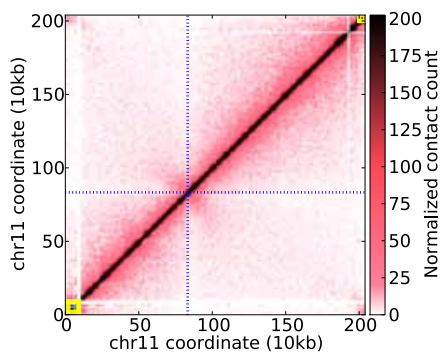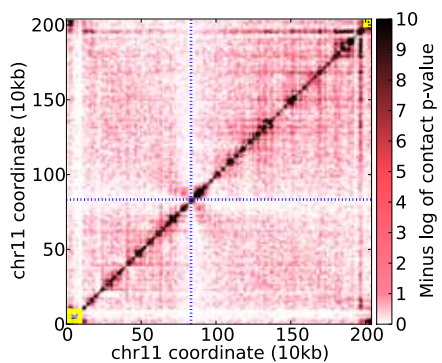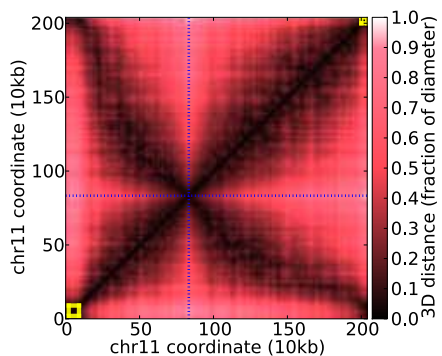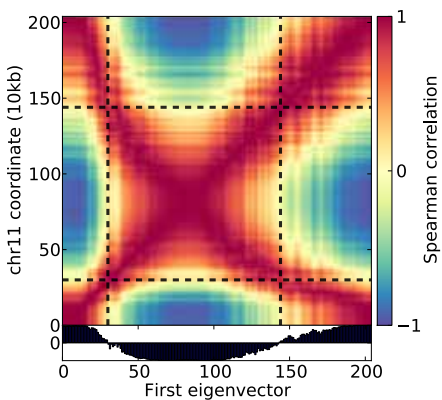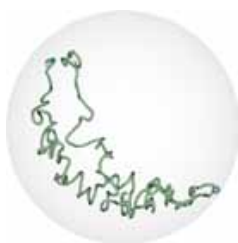

### Schizonts

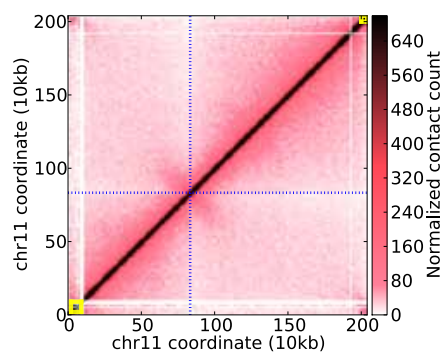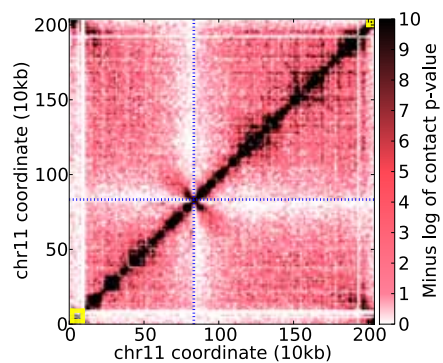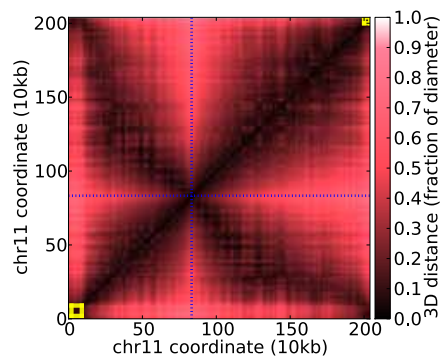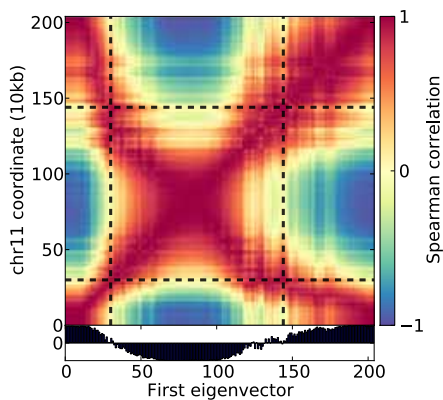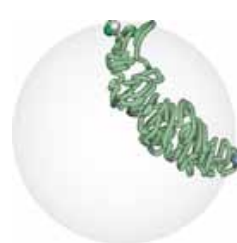

## Chromosome 12

### Rings

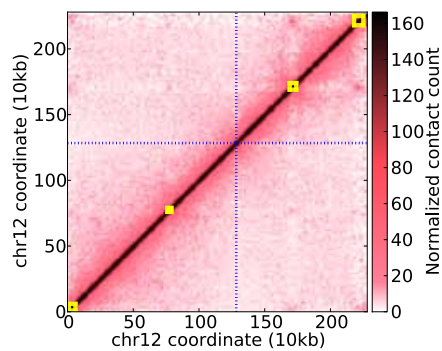

### Tophozoites

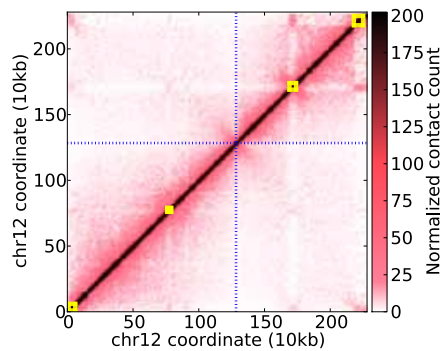

### Schizonts

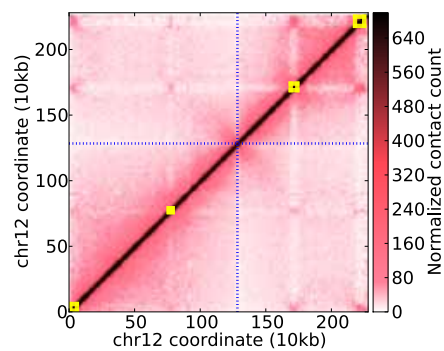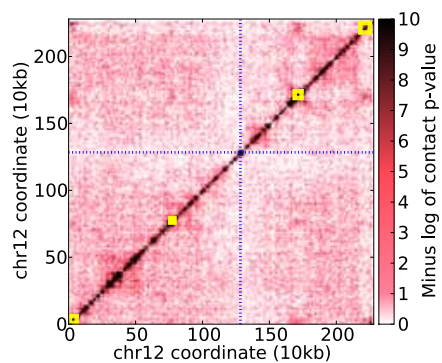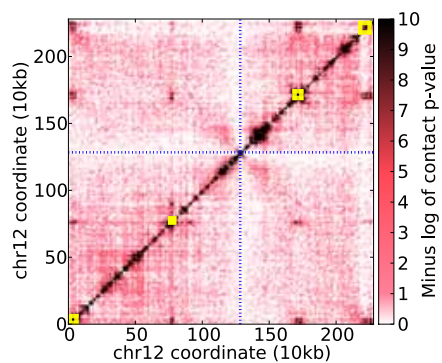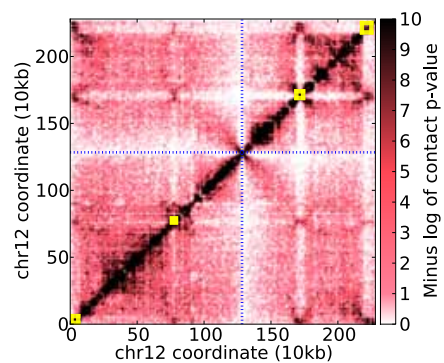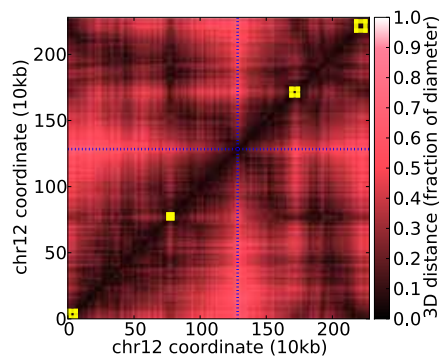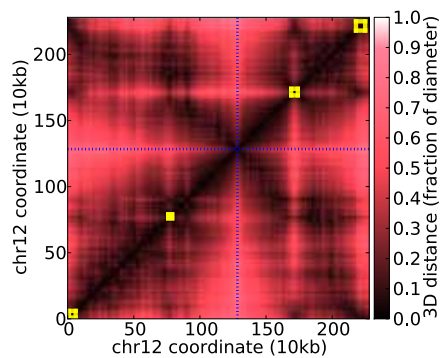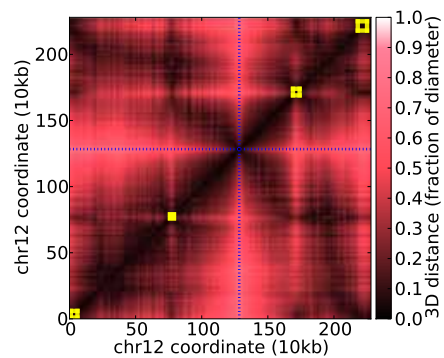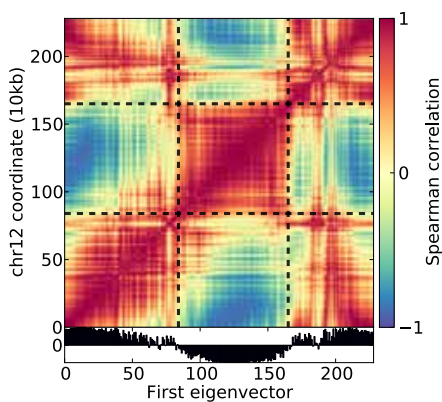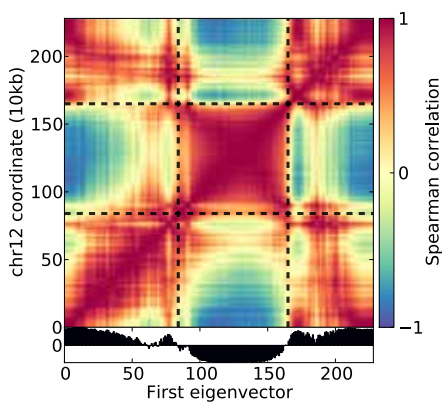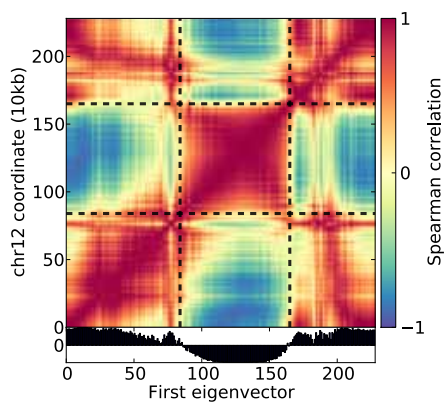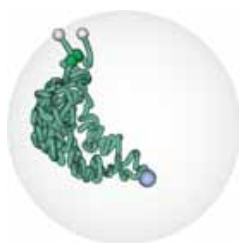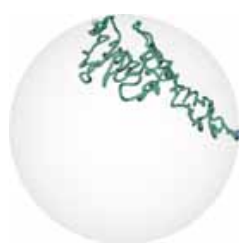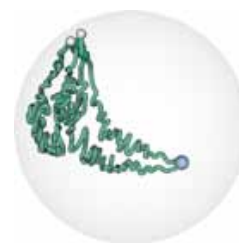



## Chromosome 13

### Rings

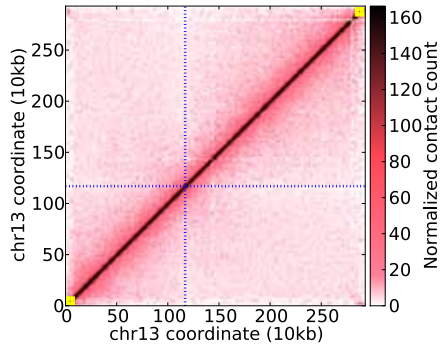

### Trophozoites

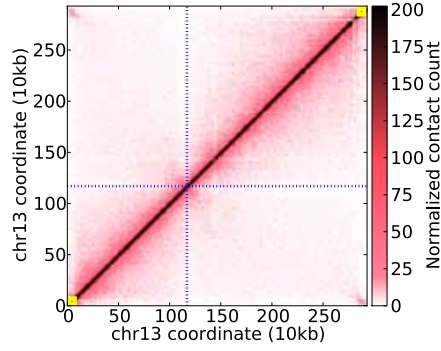

### Schizonts

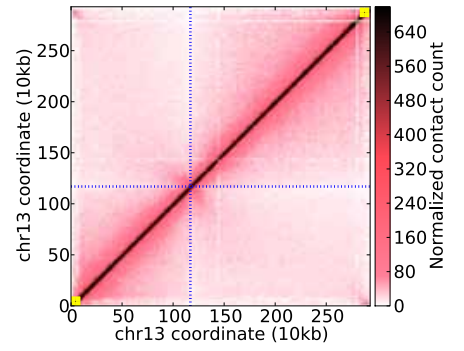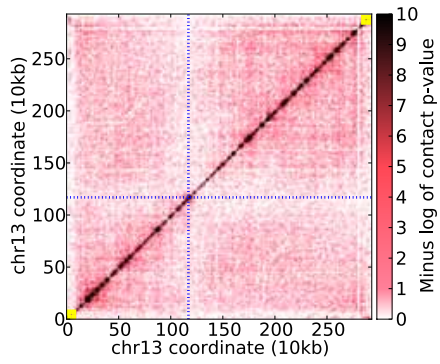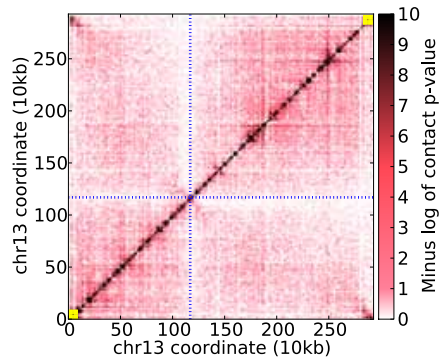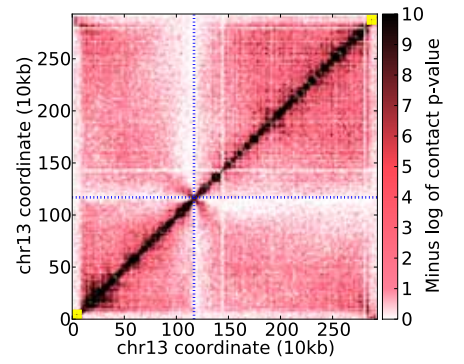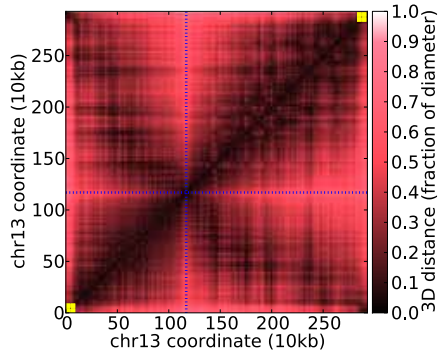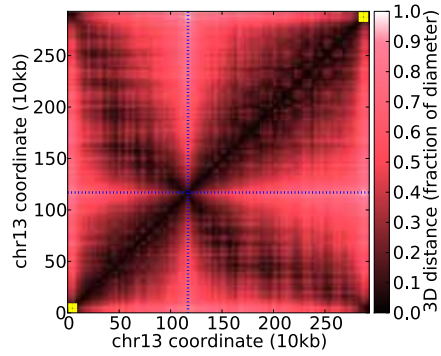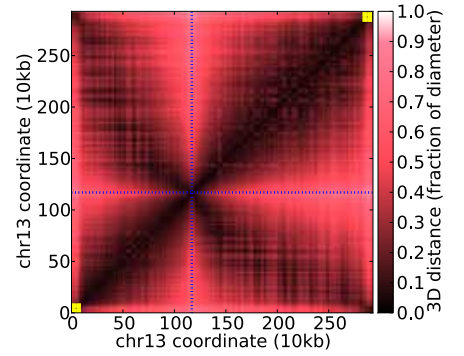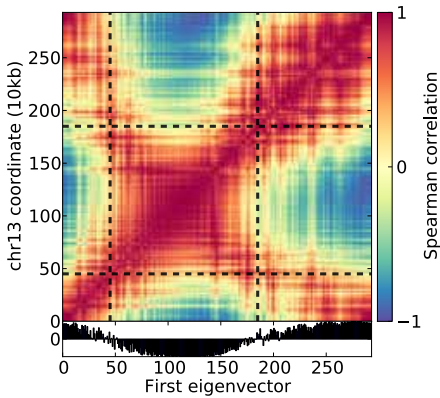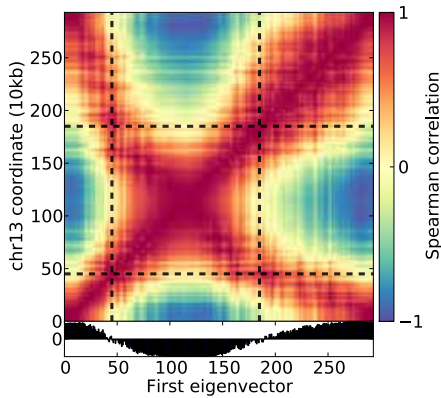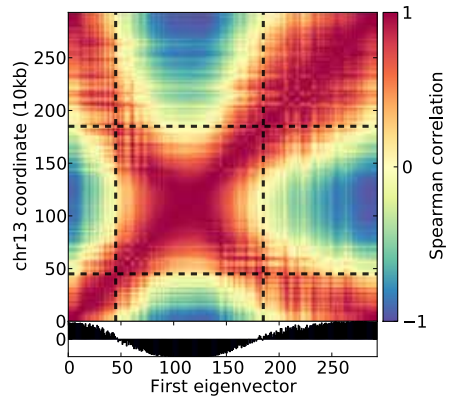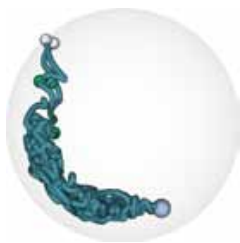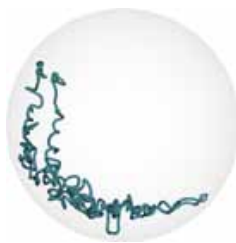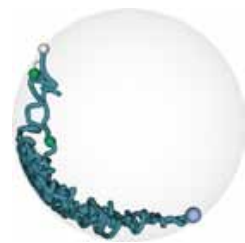

# Chromosome 14

## Rings

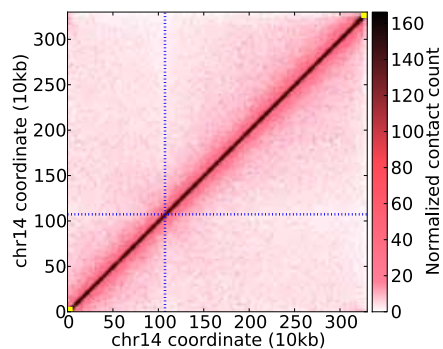

## Trophozoites

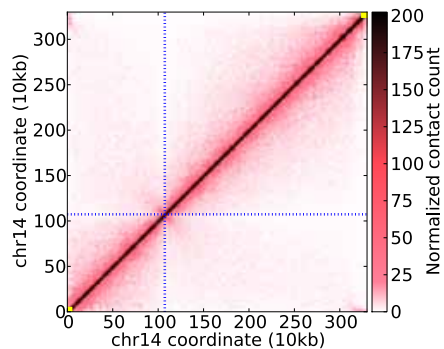

## Schizonts

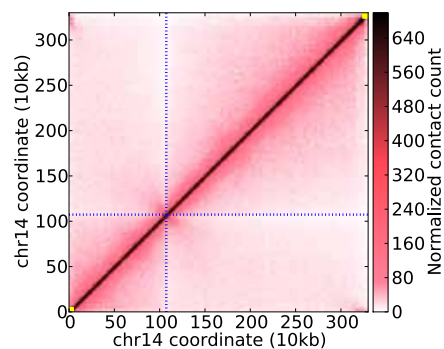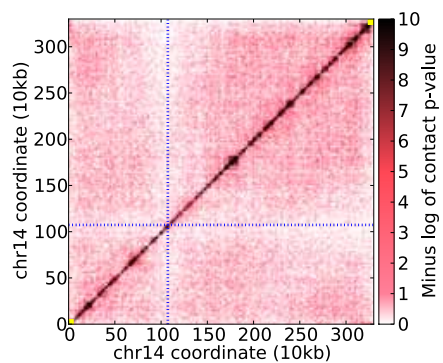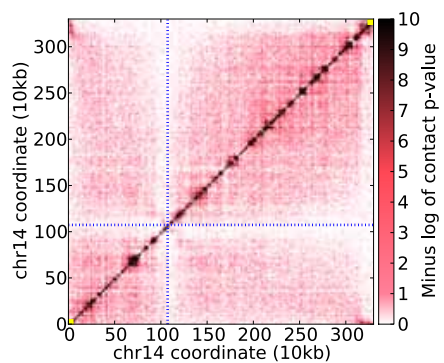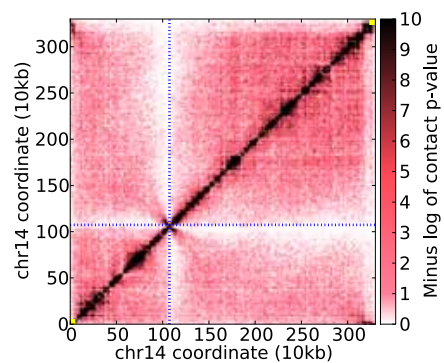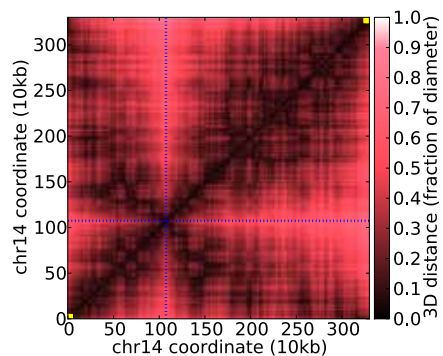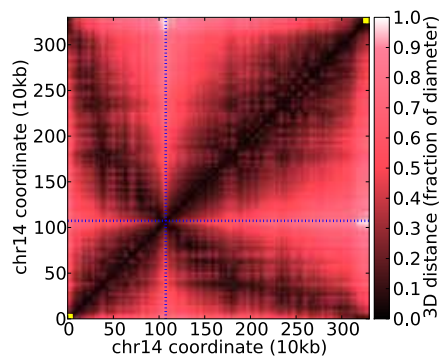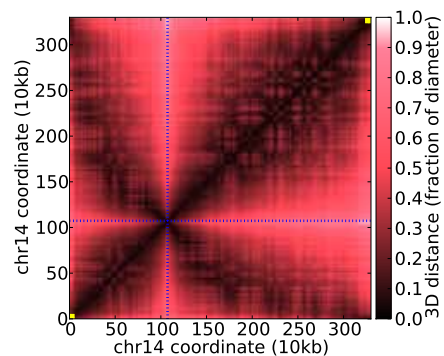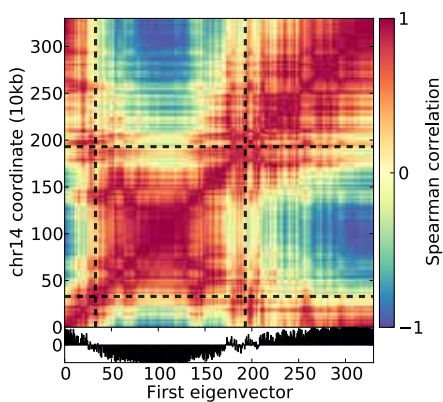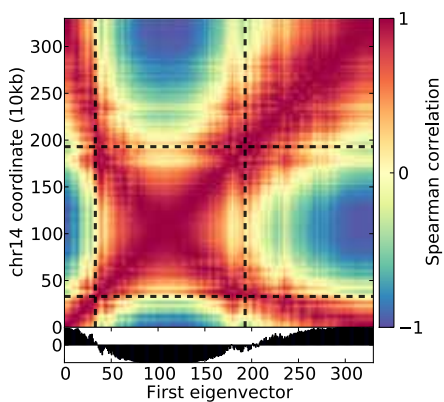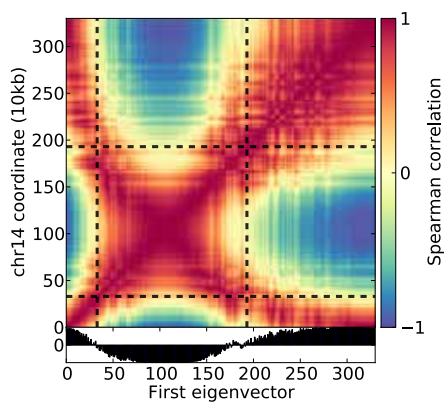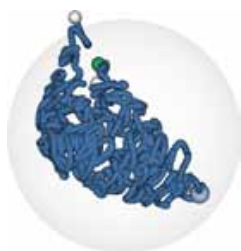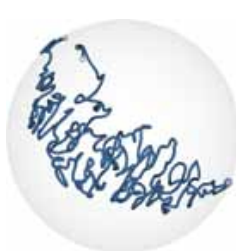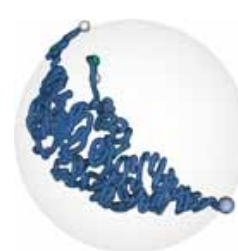



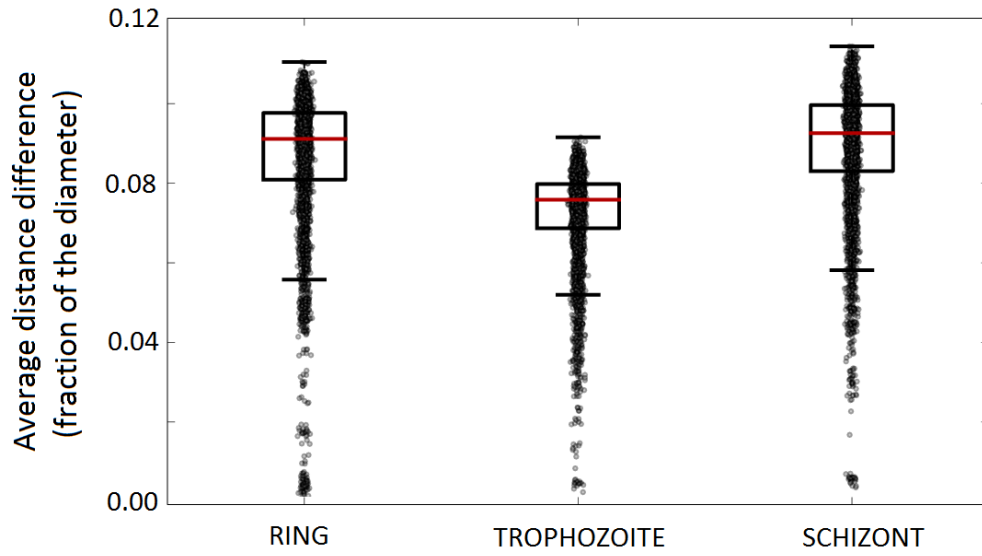

**Supplementary Figure 4: Similarity between 3D models inferred from 100 different initializations.**

We computed the average distance differences (Methods) for each pair of structures (i.e.,  $\binom{100}{2}$ ) that are inferred from different initializations and summarized these difference using a box plot for each stage. Each box extends from the lower to upper quartile values with a red line at the median. These results show that the 3D distance between a pair of loci varies, on the average, less than 10% of the nuclear diameter from one structure to another.

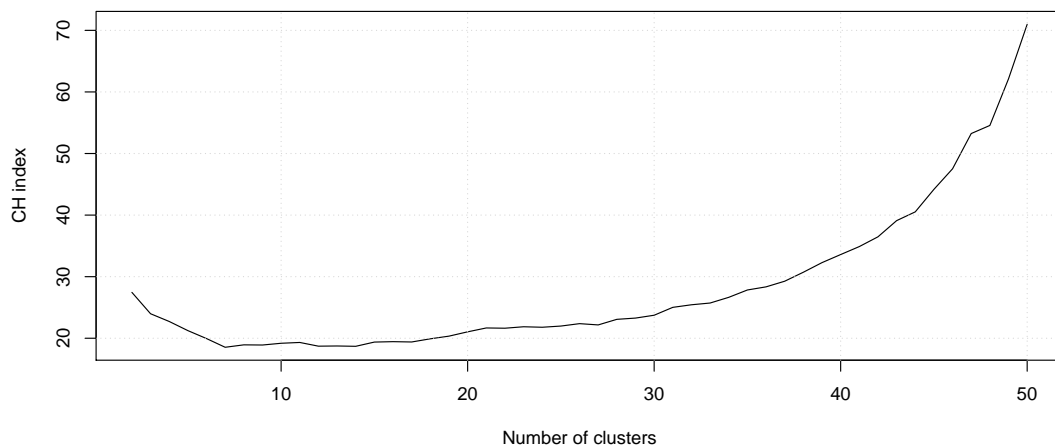

(a) Ring

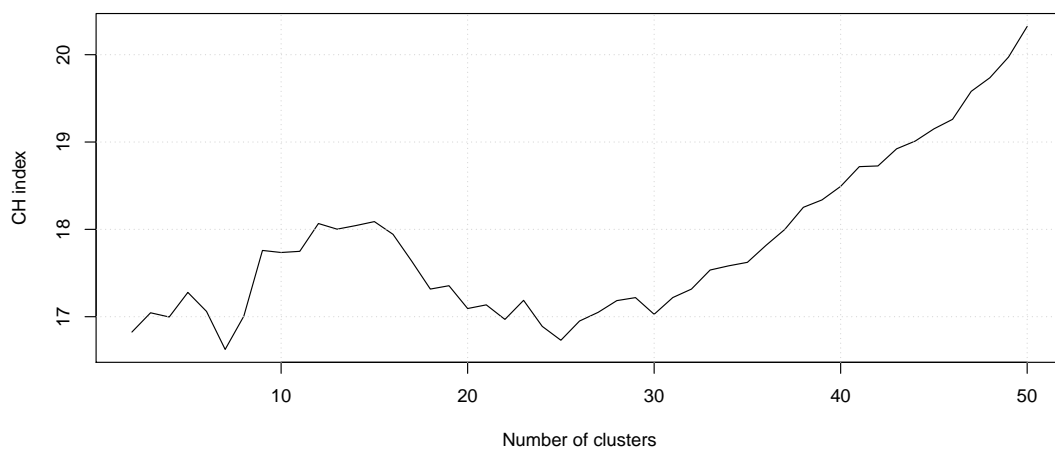

(b) Trophozoite

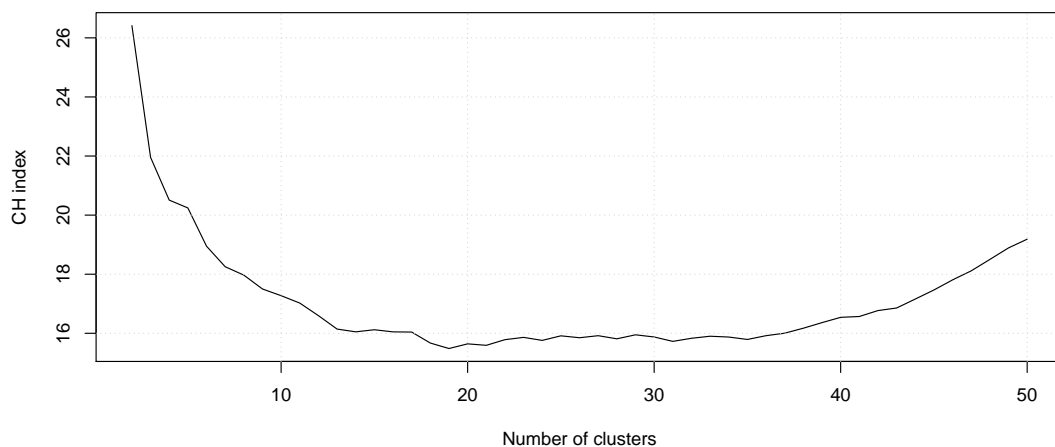

(c) Schizont

**Supplementary Figure 5: Clustering of the 100 structures using pairwise RMSD values.**

To assess whether the 100 structures generated from different random initializations fall into discrete clusters we performed hierarchical clustering on the pairwise RMSD matrix of each stage. We computed and plotted the Calinski-Harabasz (CH) index [9] for each clustering while varying the number of clusters from 2 to 50. None of the stages exhibited a clear peak of the CH index, suggesting that the set of structures do not fall into discrete clusters.

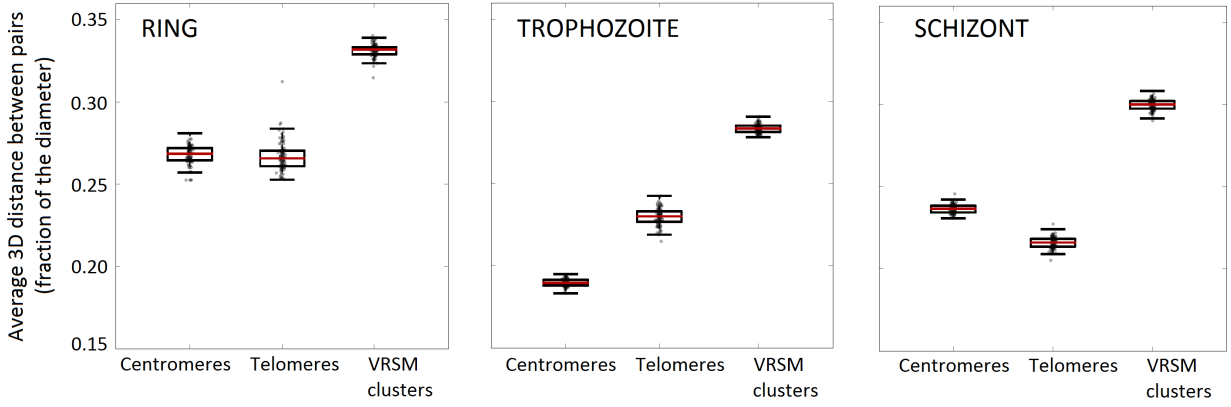

**Supplementary Figure 6: Conservation of centromere, telomere and VRSM gene colocalizations across 100 different initializations.**

We computed the average 3D distance between pairs of centromeres ( $\binom{14}{2}$  pairs), telomeres ( $\binom{28}{2}$  pairs) and VRSM clusters (8 internal, 28 subtelomeric clusters and a total of  $\binom{36}{2}$  pairs) for each of the 100 structures inferred from different initializations and summarized these average distances using a box plot for each stage. Each box extends from the lower to upper quartile values with a red line at the median. These results suggest that the major organizational hallmarks concerning colocalization of centromere, telomere and VRSM gene regions are common to all structures gathered from different initializations.

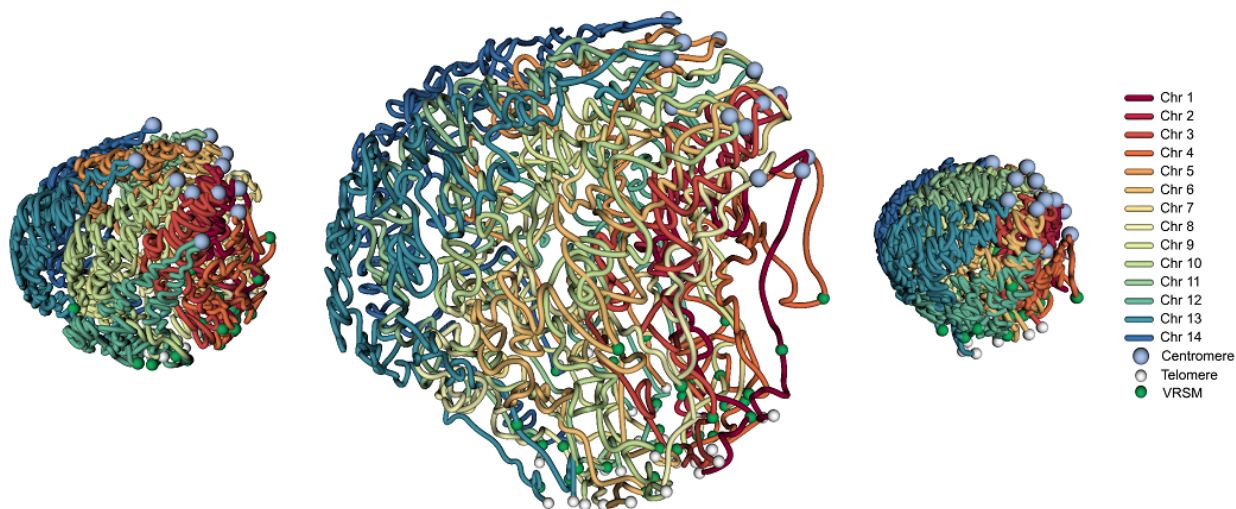

**Supplementary Figure 7: 3D structures of all three stages (centromere clustering).**

This figure is identical to Main Figure 2a except the view is rotated to visualize the centromere clustering for each stage. Centromeres and telomeres are indicated with light blue and white spheres, respectively. Midpoints of VRSM gene clusters are shown with green spheres.



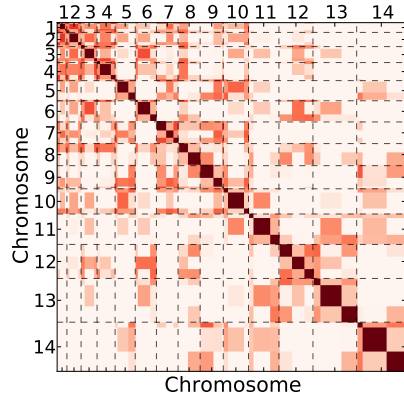

(a) Before clustering (Ring)

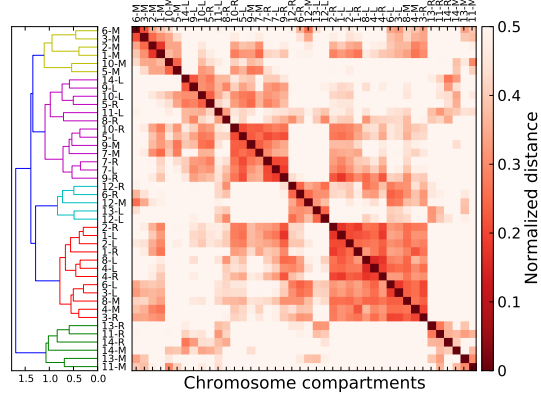

(b) Hierarchical clustering (Ring)

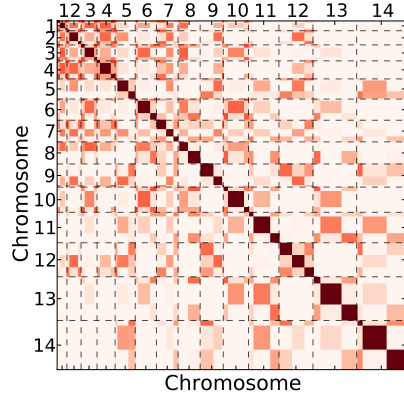

(c) Before clustering (Trophozoite)

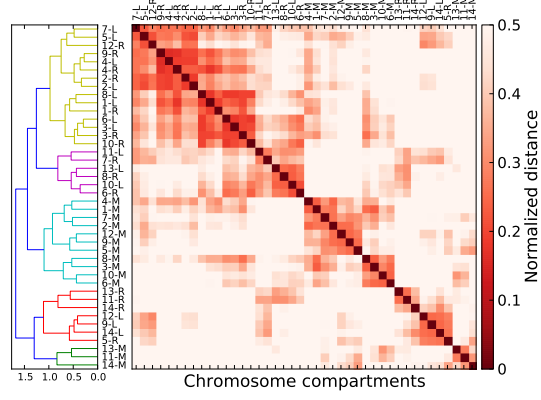

(d) Hierarchical clustering (Trophozoite)

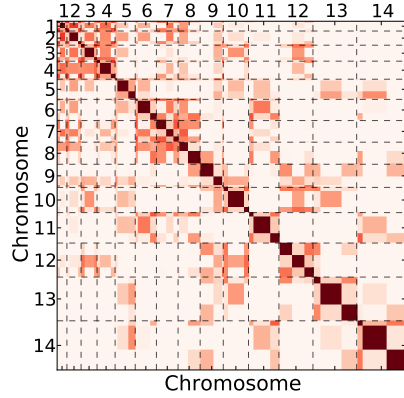

(e) Before clustering (Schizont)

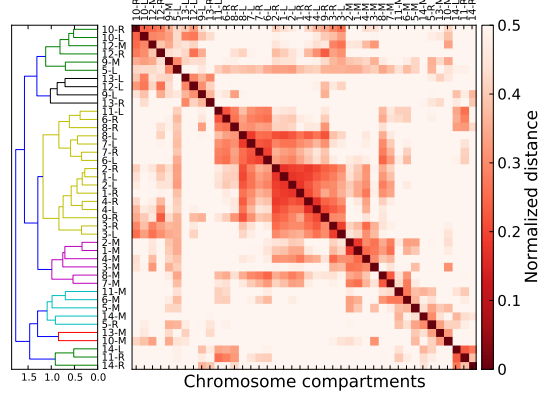

(f) Hierarchical clustering (Schizont)

### Supplementary Figure 8: Hierarchical clustering of compartment distance matrices.

Pairwise compartment distance matrices ( $42 \times 42$ , three compartments on each chromosome) that are identified by eigenvalue decomposition (Methods) for (a) ring, (c) trophozoite and (e) schizont stages. Distances are averaged over all pairs of loci between the two compartments and normalized using nuclear diameter to result in a fraction between 0 and 1. In the figure, the actual length of each compartment and each chromosome are preserved. Each compartment is colored separately, with dashed lines segregating adjacent chromosomes. Hierarchical clustering of pairwise compartment distance matrices for (b) ring, (d) trophozoite and (f) schizont stages. Clustering was performed using the average linkage score. Each compartment is represented by a fixed length, and L, M, R denote left, mid, right compartments, respectively. For all panels the color bars extend from 0 to 0.5 (i.e., distance equals nuclear radius).

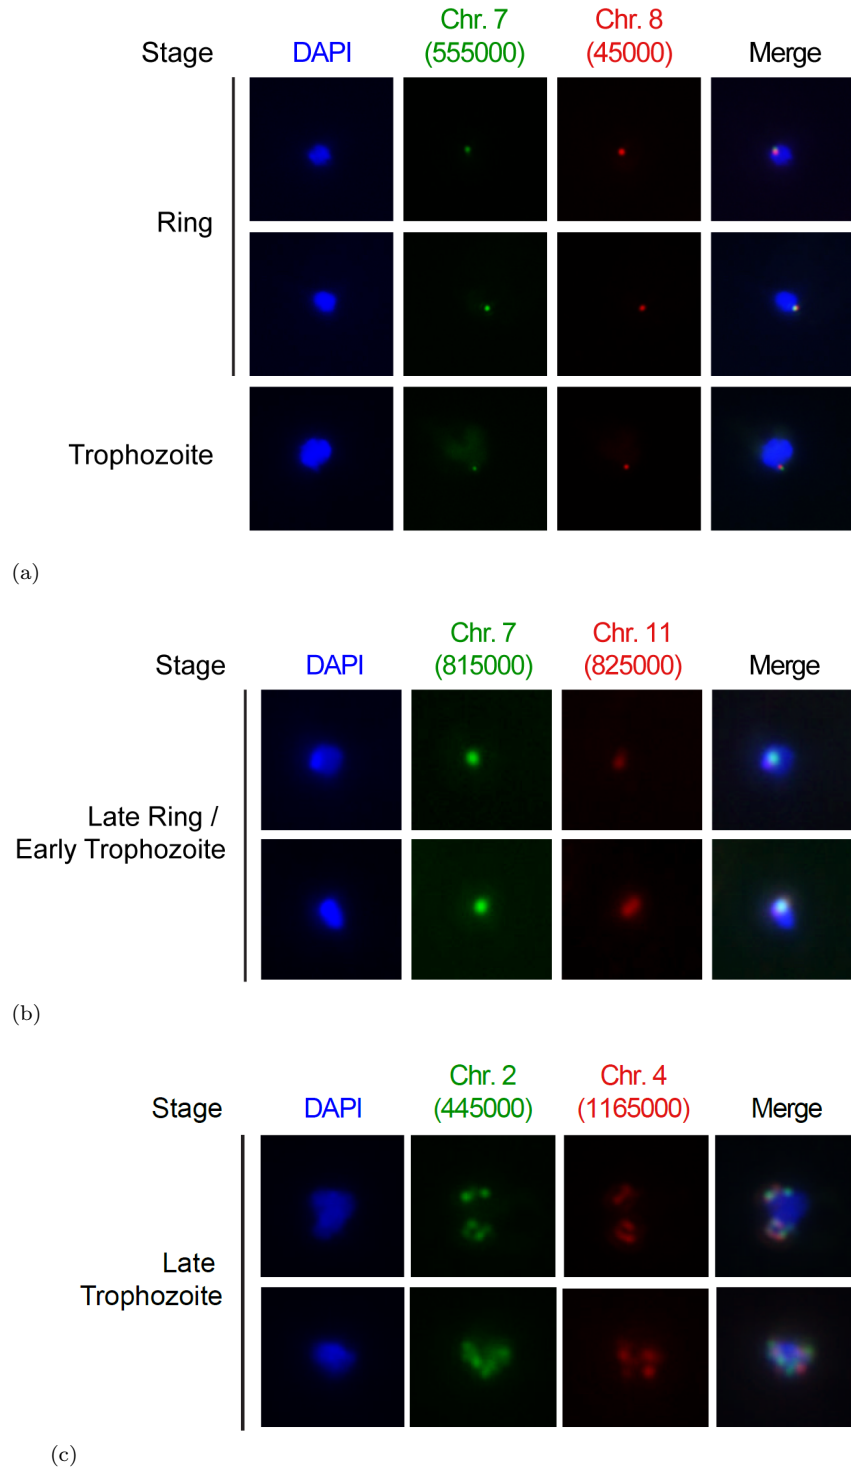

**Supplementary Figure 9: Validation of 3D models with DNA FISH.**

Additional FISH images for (a) a pair of interchromosomal loci with VRSM genes (chr7:550,000-560,000 containing internal VRSM genes and chr8:40,000-50,000 containing subtelomeric VRSM genes) (b) a pair of interchromosomal loci that harbor no VRSM genes (chr7:810,000-820,000 and chr11:820,000-830,000). (c) FISH images showing lack of colocalization as a negative control for a pair of interchromosomal loci that harbor no VRSM genes and have no contacts in trophozoite stage (chr2:440,000-450,000 and chr4:1,160,000-1,170,000).

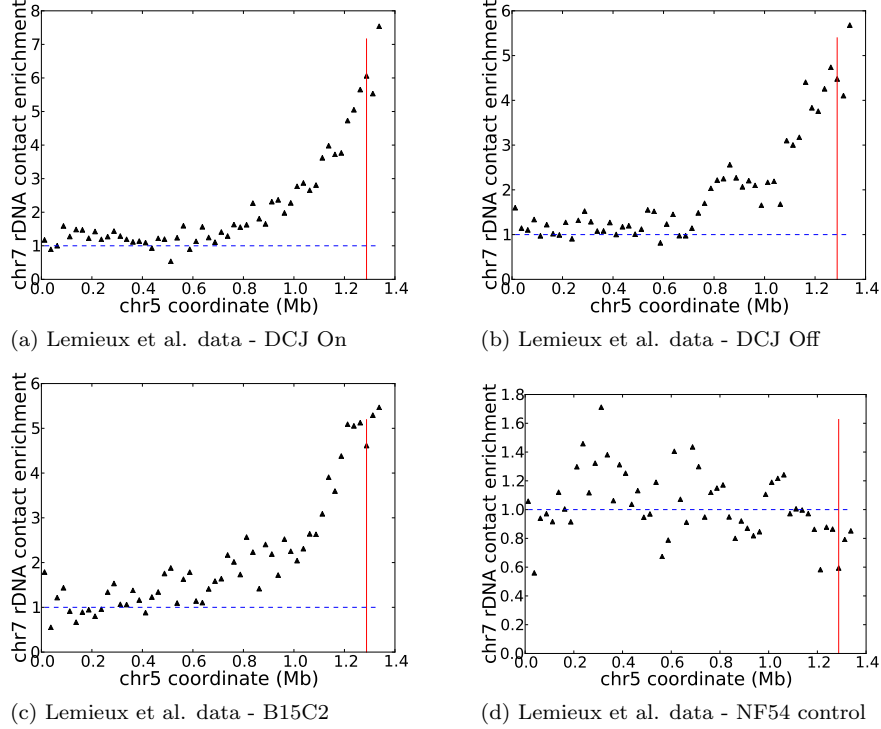

**Supplementary Figure 10: Clustering of highly transcribed rDNA units in Lemieux et al. data.** Hi-C libraries generated with MboI restriction enzyme from Lemieux et al. [10] were mapped to the *P. falciparum* genome and further processed using the pipeline we processed our data with to generate and normalize contact maps at 25 kb resolution. The normalized contact maps were used for virtual 4C plots using as a bait the A-type rDNA unit on chromosome 7. As suggested in Lemieux et al., contact counts from 50 kb up- and downstream of the 25 kb bin containing rDNA unit were used, and the rDNA-containing window itself was removed from the analysis. For each window  $w$  on chromosome 5, the contact enrichment was calculated by dividing the contact count between the bait and  $w$  to the average interchromosomal contact count for the bait locus.

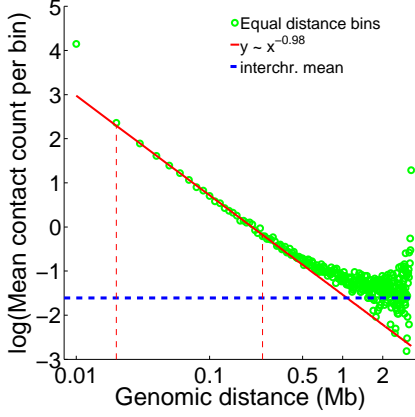

(a) Lemieux et al. data - B15C2

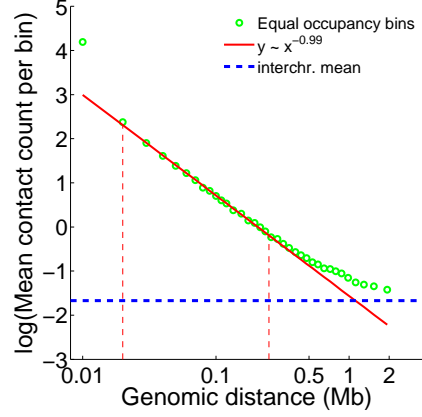

(b) Lemieux et al. data - B15C2

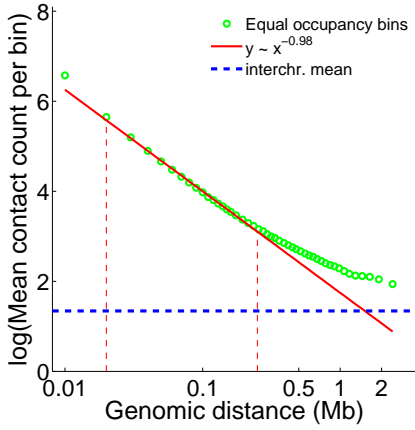

(c) Our data - Ring

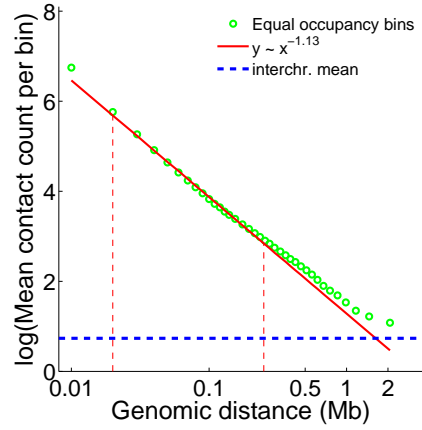

(d) Our data - Trophozoite

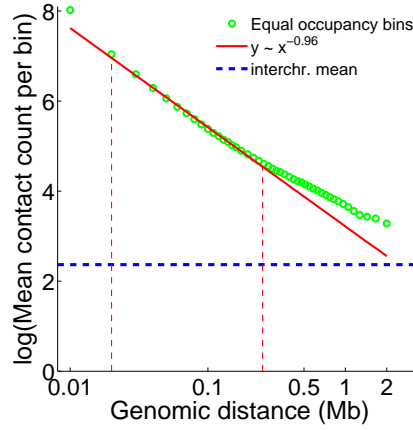

(e) Our data - Schizont

### Supplementary Figure 11: Comparison of inter and intrachromosomal contact prevalence.

The relationship between contact count and genomic distance is estimated using bins with equal genomic distances (e.g., 10 kb, 20 kb) in Lemieux et al. [10]. Due to the diminishing number of possible locus pairs with increasing genomic distance (e.g., only one locus pair for the bin with the largest genomic distance) this estimation leads to many high variance bins for large genomic distances. This issue can be addressed by using variable-width bins that contain equal numbers of contacts (see Methods). Plotted are the log (base  $e$ ) of mean contact count per bin when using (a) equal distance binning, (b) equal occupancy binning for B15C2 library of Lemieux et al. [10] and (c-e) equal occupancy binning for ring, trophozoite and schizont stage data from this work. Dashed vertical red lines denote the range used to compute the log-linear fit.

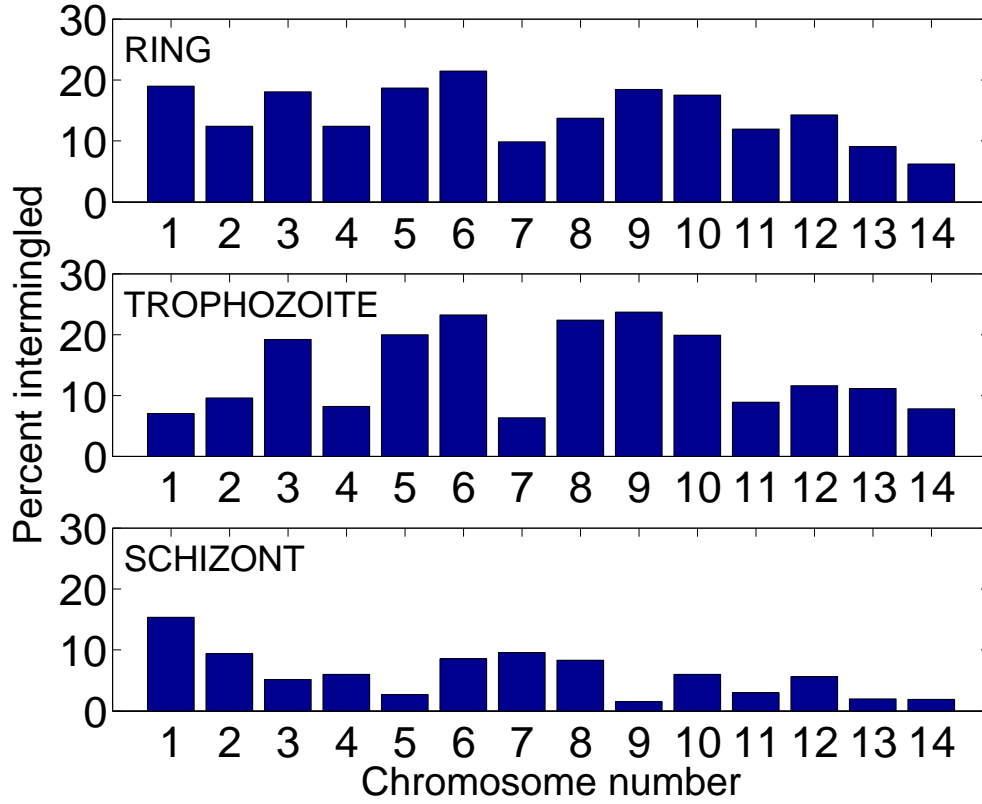

**Supplementary Figure 12: Changes in chromosome territories during the erythrocytic cycle.**

The extent to which a chromosome intermingles with other chromosomes is characterized by the percentage of nuclear volume that is jointly occupied by the chromosome of interest and at least one other chromosome, relative to the entire volume occupied by the chromosome. To compute the percentages on the y-axis, the nuclear volume was sampled using 1,000,000 randomly generated small spheres with radius 5% of the actual nuclear radius. For each chromosome  $i$ , two numbers were calculated: the number of spheres that contain a locus from chromosome  $i$  ( $n_i$ ) and the number of such spheres that contain no locus from another chromosome ( $e_i$ ). The percent intermingled (y-axis) for chromosome  $i$  is computed as  $100 \times \frac{n_i - e_i}{n_i}$ . Because the exact percentages are highly dependent on the selection of the random sphere size, the procedure was repeated using spheres with radii 2%, 10% and 20% of the nuclear volume. For each setting, the trophozoite stage exhibited the highest amount of intermingling, whereas the schizont stage showed the lowest. Also, the larger chromosomes (i.e., chromosomes with higher numbers) consistently showed lower intermingling compared to smaller chromosomes at each stage and for each threshold.

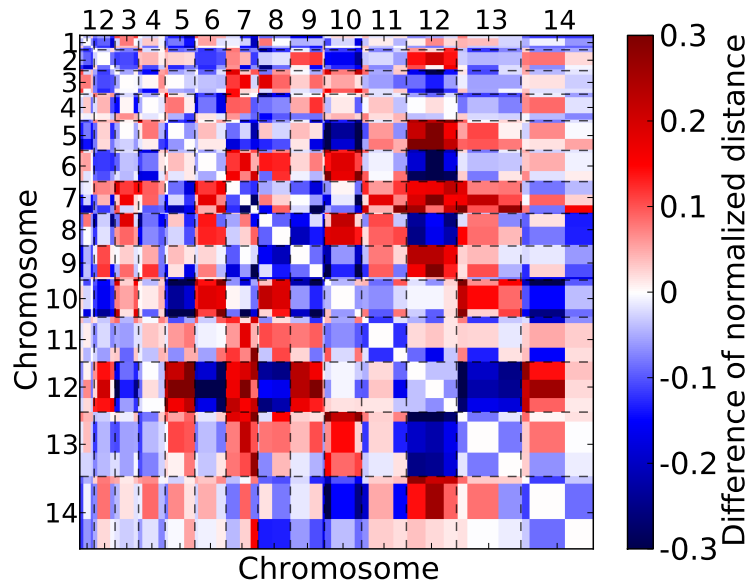

(a) From ring to trophozoite

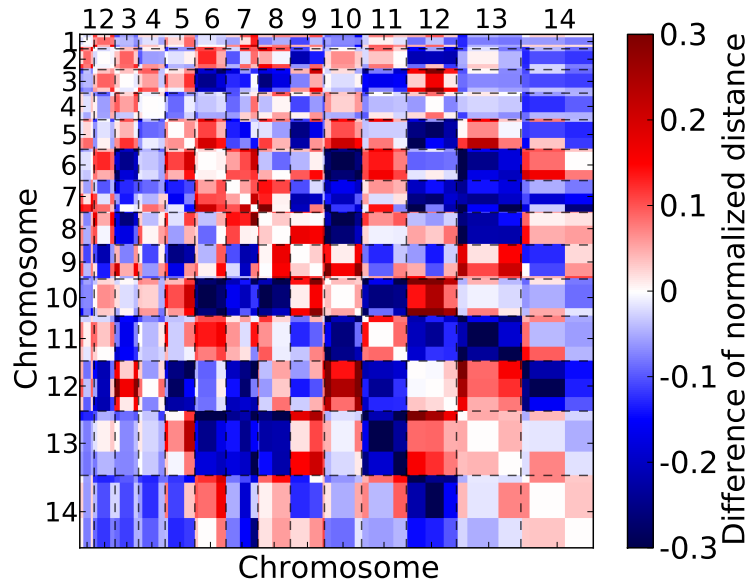

(b) From trophozoite to schizont

**Supplementary Figure 13: Movement of chromosome compartments with respect to each other.**

Each compartment movement matrix is generated by subtracting the pairwise compartment distance matrix (Supplementary Fig. 8) of one stage from the matrix of the preceding stage. Plotted are the movements (a) from ring to trophozoite (i.e., trophozoite minus ring), (b) from trophozoite to schizont (i.e., schizont minus trophozoite). Red color indicates that a pair of compartments are closer in the later stage compared to the earlier, and blue color indicates vice versa.

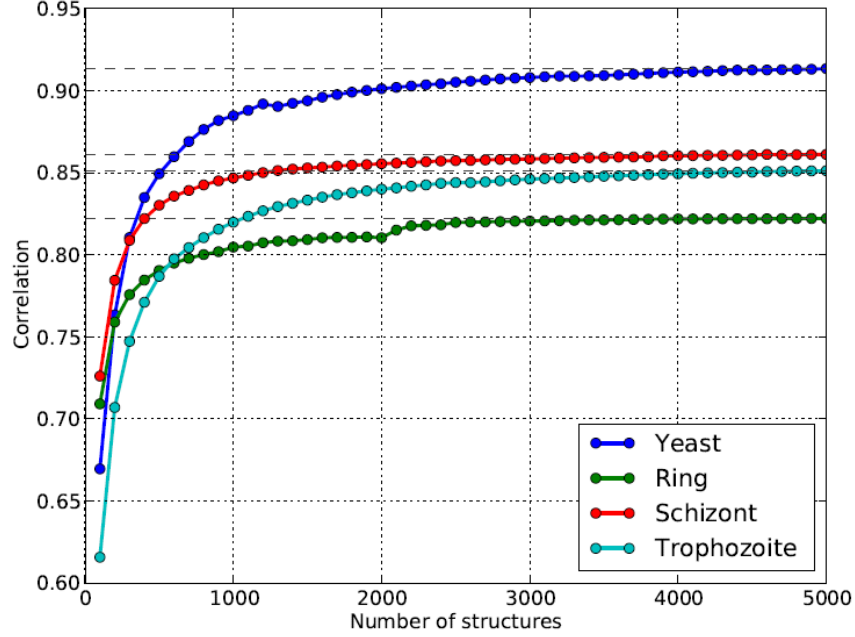

(a)

| Contact map 1               | Contact map 2                   | Row-based corr. | Normalized row-based corr. |
|-----------------------------|---------------------------------|-----------------|----------------------------|
| Yeast ( <i>Hi-C</i> )[1]    | Yeast ( <i>VE</i> )             | 0.915           | 0.573                      |
|                             | Yeast ( <i>expected</i> )       | 0.922           | 0.115                      |
| Ring ( <i>Hi-C</i> )        | Ring ( <i>VE</i> )              | 0.843           | 0.340                      |
|                             | Ring ( <i>expected</i> )        | 0.928           | 0.072                      |
| Trophozoite ( <i>Hi-C</i> ) | Trophozoite ( <i>VE</i> )       | 0.848           | 0.392                      |
|                             | Trophozoite ( <i>expected</i> ) | 0.908           | 0.063                      |
| Schizont ( <i>Hi-C</i> )    | Schizont ( <i>VE</i> )          | 0.864           | 0.487                      |
|                             | Schizont ( <i>expected</i> )    | 0.923           | 0.081                      |

(b)

**Supplementary Figure 14: Volume exclusion modeling and correlation calculation.**

(a) Row-based Pearson correlation between the observed *Hi-C* contact map and the average contact map from volume exclusion modeling as a function of the number of simulated structures. (b) Row-based Pearson correlation and normalized row-based Pearson correlation between the two contact maps listed in each row for various *Hi-C* libraries. *VE* refers to contact maps obtained from 5000 structures generated by volume exclusion and *expected* refers to matrices with expected contact counts generated from observed *Hi-C* matrices as described in Methods.

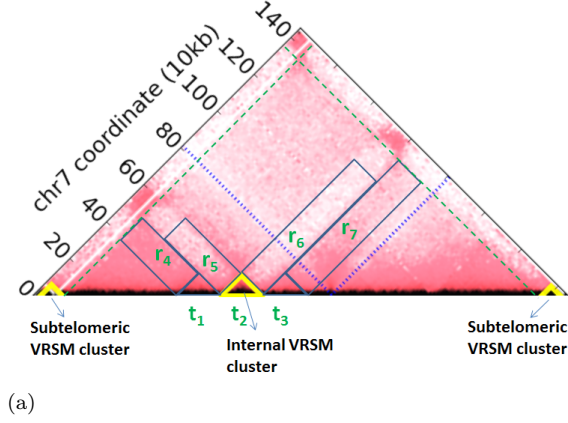

| <i>Internal VRSM</i> | <i>Stage</i> | $t_2$ vs. $t_1$ | $t_2$ vs. $t_3$ | $r_5$ vs. $r_4$ | $r_6$ vs. $r_7$ |
|----------------------|--------------|-----------------|-----------------|-----------------|-----------------|
| chr4(1)              | R            | 0               | 0.7             | 0               | -0.09           |
|                      | T            | 0.06            | 0.2             | -0.11           | -0.25           |
|                      | S            | 0.1             | 0.16            | 0.13            | -0.14           |
| chr4(2)              | R            | 0.13            | 0.12            | -0.38           | -0.27           |
|                      | T            | 0.15            | 0.15            | -0.42           | -0.33           |
|                      | S            | 0.14            | 0.13            | -0.37           | -0.3            |
| chr4(3)              | R            | 0.03            | 0.08            | -0.37           | -0.34           |
|                      | T            | 0.03            | 0.06            | -0.55           | -0.41           |
|                      | S            | 0.03            | 0.01            | -0.48           | -0.42           |
| chr6(1)              | R            | 0.12            | 0.1             | 0.02            | -0.06           |
|                      | T            | 0.19            | 0.2             | -0.09           | -0.16           |
|                      | S            | 0.16            | 0.18            | -0.08           | -0.14           |
| chr7(1)              | R            | 0.11            | 0.2             | -0.19           | -0.18           |
|                      | T            | 0.19            | 0.28            | -0.36           | -0.3            |
|                      | S            | 0.08            | 0.19            | -0.27           | -0.27           |
| chr8(1)              | R            | 0.15            | 0.08            | -0.05           | -0.09           |
|                      | T            | 0.17            | 0.09            | -0.17           | -0.13           |
|                      | S            | 0.14            | 0.09            | -0.11           | -0.11           |
| chr12(1)             | R            | 0.07            | 0.05            | -0.02           | -0.01           |
|                      | T            | 0.05            | 0.14            | -0.04           | -0.02           |
|                      | S            | 0.09            | 0.12            | -0.07           | -0.08           |
| chr12(2)             | R            | 0.09            | 0.09            | -0.09           | -0.11           |
|                      | T            | 0.17            | 0.1             | -0.27           | -0.24           |
|                      | S            | 0.09            | 0.07            | -0.19           | -0.23           |

(b)

**Supplementary Figure 15: Quantification of domain-like behavior of VRSM gene clusters.**

(a) Each internal VRSM gene cluster is characterized by a set of strong intra-cluster contacts ( $t_2$ ) and two sets of contacts with adjacent regions ( $r_5$  and  $r_6$ ) that are weak. For comparison, we also consider flanking, non-VRSM regions of the same size as the original VRSM cluster, including their “intra-cluster” contacts ( $t_1$  and  $t_3$ ) which should be similar to  $t_2$  for a contact map without domain-like structures around VRSM clusters and contacts with adjacent regions ( $r_4$  and  $r_7$ ) which are comparable to ( $r_5$  and  $r_6$ ). As seen in this example, a domain-like structure for a VRSM cluster leads to stronger contacts (+ sign) within  $t_2$  compared to both  $t_1$  and  $t_3$ , and weaker contacts (- sign) within  $r_4$  and  $r_7$  compared to  $r_5$  and  $r_6$ . (b) The table reports, for each internal VRSM gene cluster and each stage, the average normalized difference between the intra-cluster contacts within the cluster compared to its two flanking control regions, and similarly for the contacts with adjacent regions. The metric we use for comparing two contact sub-matrices  $X, Y$  of dimension  $N \times M$  is  $\frac{1}{NM} \sum_{i=1}^N \sum_{j=1}^M \frac{x_{ij} - y_{ij}}{\frac{1}{2}(x_{ij} + y_{ij})}$  where  $x_{ij}$  and  $y_{ij}$  are the  $ij$ th entries of  $X$  and  $Y$ , respectively. Values that have signs inconsistent with the expected pattern (i.e., +, +, -, -) are indicated with a grey background. Every internal VRSM cluster exhibits the expected sign pattern in at least one stage.



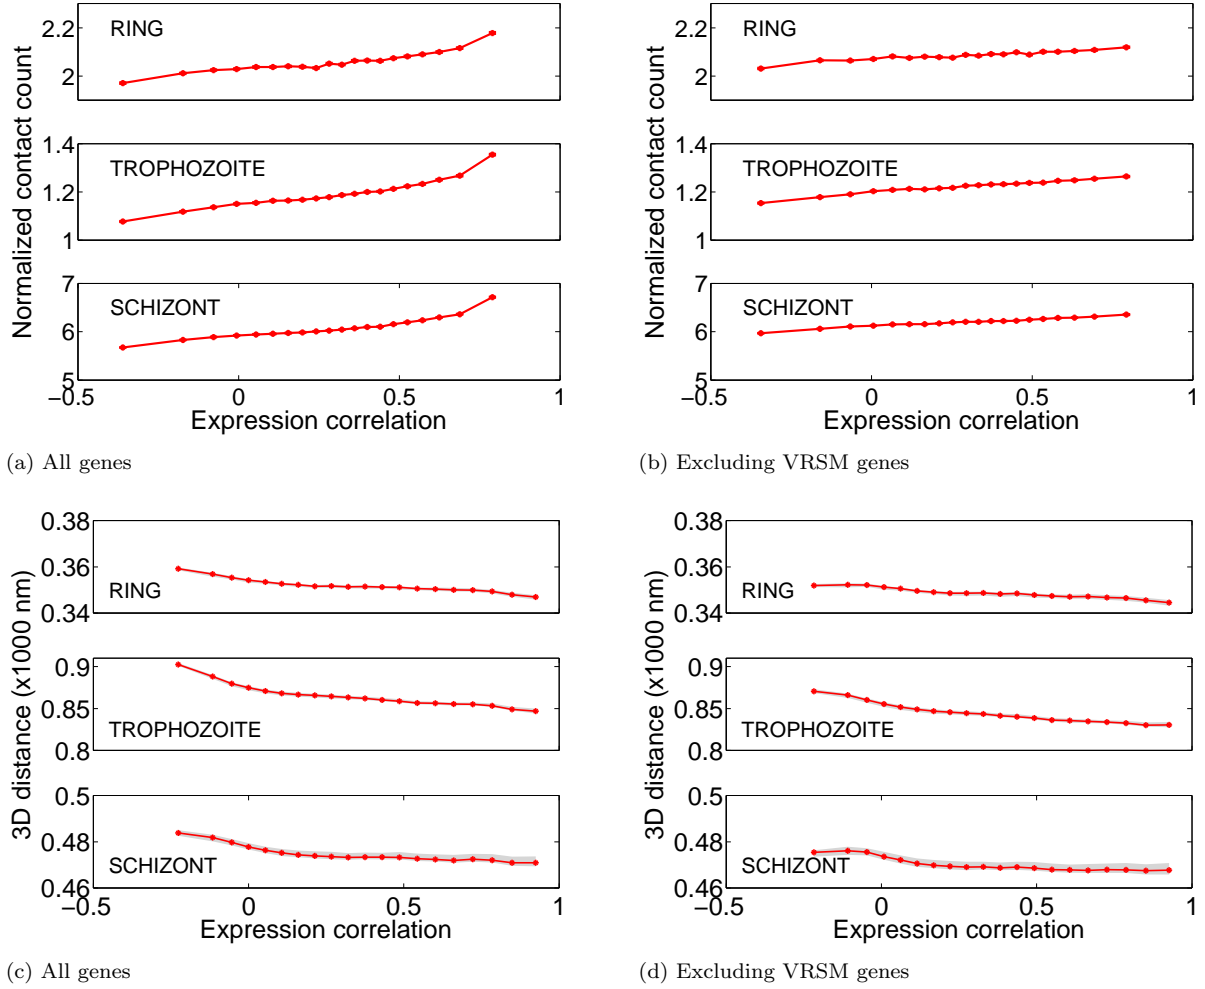

**Supplementary Figure 16: Revisiting the relationship between 3D architecture and gene expression by excluding VRSM genes.**

(a) is identical to Main Figure 6a and (b) is generated identical to (a) except all gene pairs involving at least one VRSM gene are omitted from the analysis. Re-evaluation of our hypothesis that interchromosomal gene pairs that have contact counts within the top 20% for each stage have more highly correlated expression profiles than the remaining gene pairs still yielded significant p-values for each stage [Wilcoxon rank-sum test, p-values  $1.07\text{e-}70$  (ring), 0 (trophozoite), and  $1.68\text{e-}302$  (schizont)]. (c) is identical to Main Figure 6b and (d) is generated identical to (c) except all gene pairs involving at least one VRSM gene are omitted from the analysis. Re-evaluation of our hypothesis that interchromosomal gene pairs closer than 20% of the nuclear diameter have more highly correlated expression profiles than other genes still yielded significant p-values for each stage [Wilcoxon rank-sum test, p-values  $3.27\text{e-}48$  (ring),  $1.32\text{e-}157$  (trophozoite), and  $2.16\text{e-}5$  (schizont)].

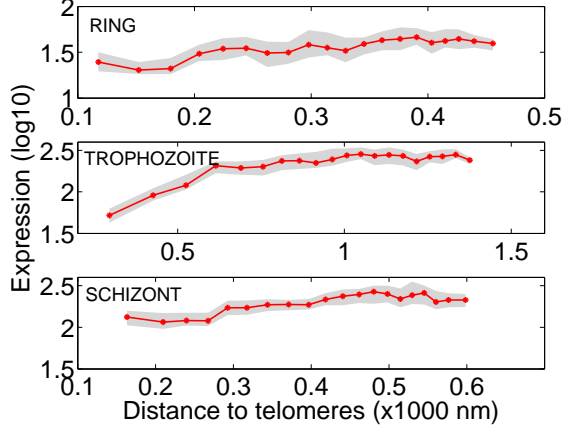

(a) All genes

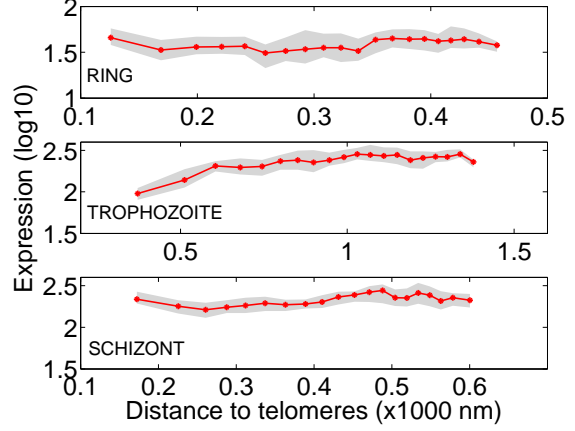

(b) Excluding VRSM genes

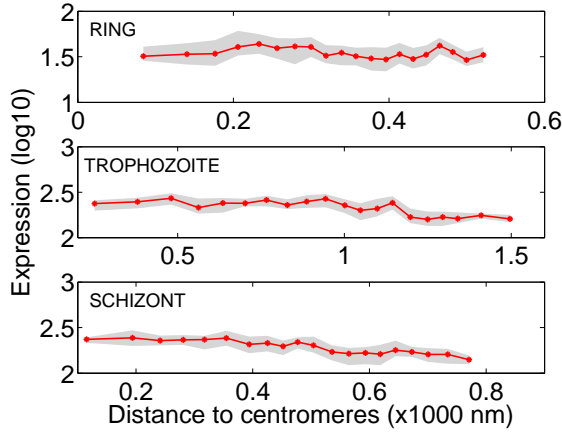

(c) All genes

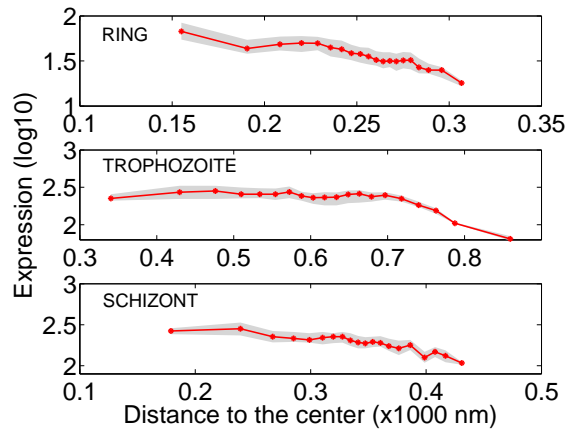

(d) All genes

**Supplementary Figure 17: The relationship between distance to the telomeres, nuclear center and centromeres versus the gene expression.**

(a) is identical to Main Figure 6c and (b) is generated identical to (a) except all VRSM genes are omitted from the analysis. Re-evaluation of our hypothesis that genes which lie within a distance of 20% of the nuclear diameter to the centroid of the telomeres exhibit lower expression levels yielded a significant p-value for trophozoite stage but not for ring and schizont stages at a significance threshold of 0.01 [Wilcoxon rank-sum test, p-values 0.21 (ring), 1.5e-3 (trophozoite), and 0.035 (schizont)]. (c) and (d) are generated identical to (a) expect the distance of genes are measured to (c) the centroid of the centromeres and (d) the nuclear center. For each figure, genes are first sorted in increasing order according to their distances to the landmark of interest and then binned into 20 equal width quantiles (5th, 10th, ..., 100th). For each bin, the average distance to the landmark (x-axis) and the average log expression value [11] together with its standard error (y-axis) are computed and plotted.

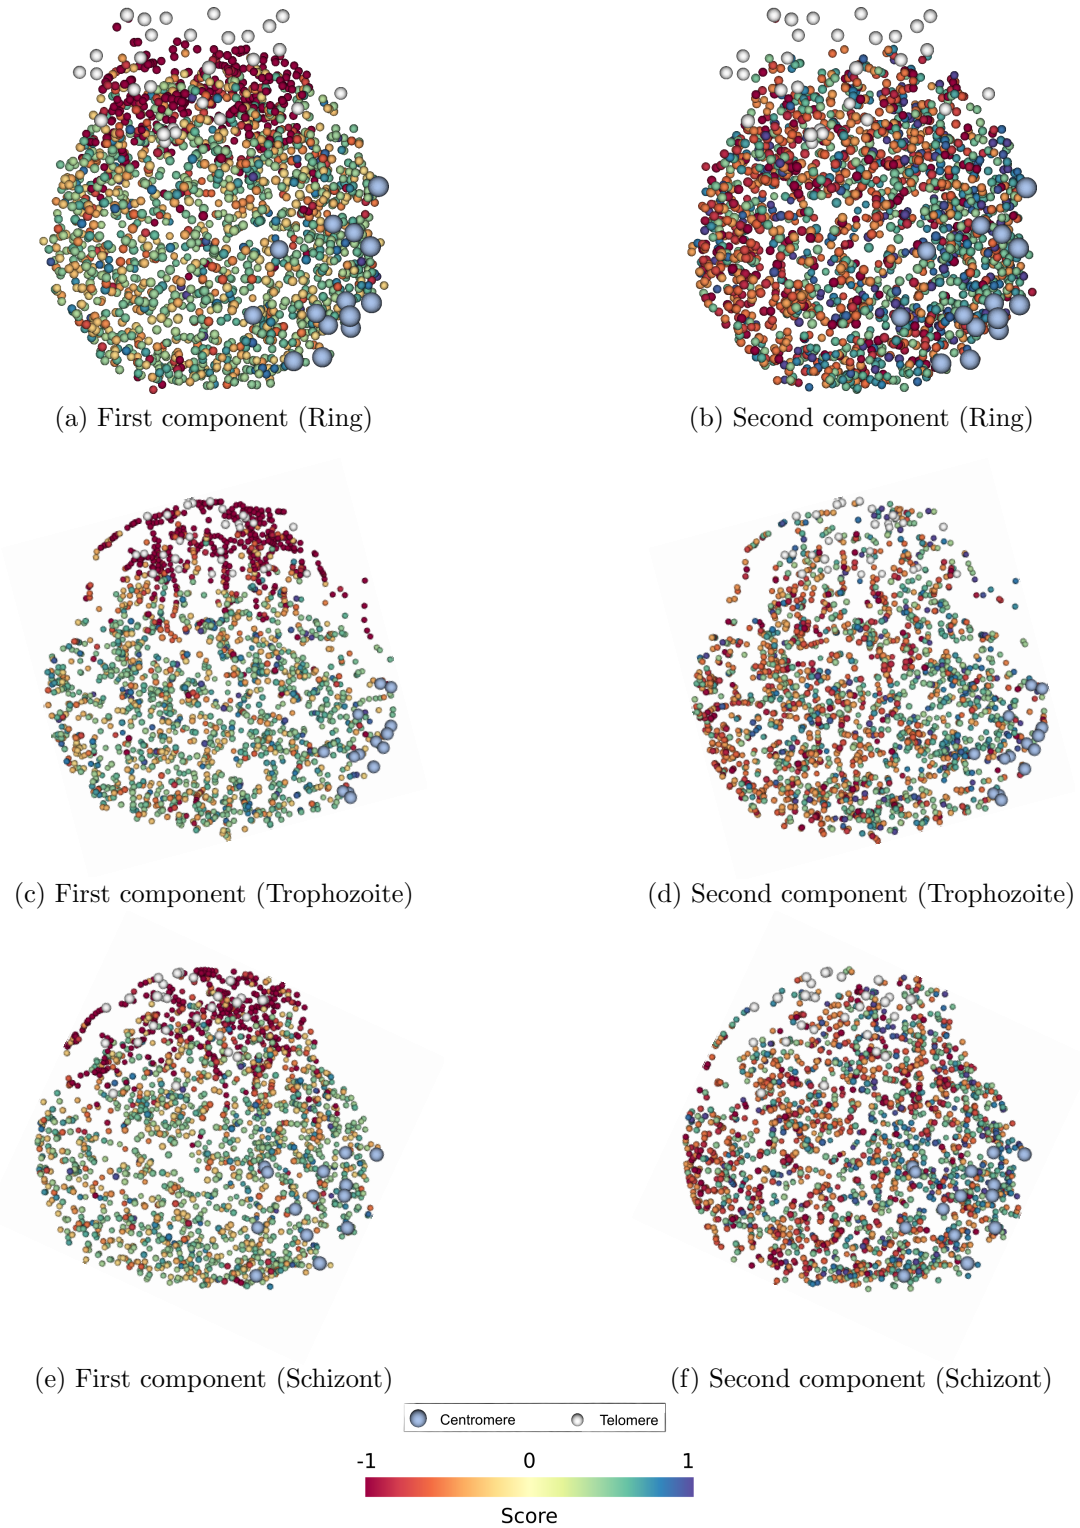

**Supplementary Figure 18: kCCA expression profiles component score.**

Each panel shows the projection of the gene expression profile onto one of the two extracted kCCA profiles for a specified erythrocytic stage, with the score of the projection encoded on the color scale. For the first kCCA component, the projections consistently exhibit a striking gradient from the telomeric region across the nucleus, while for the second component, which is less coherent with the 3D structure, the projection gradient extends from the centromeres across the nucleus.

## Supplementary Notes

### Supplementary Note 1: Tethered conformation capture procedure

**Day 1** Parasite pellets were thawed on ice in 550  $\mu$ l Hi-C lysis buffer (25 mM Tris-HCl at pH 8.0, 10 mM NaCl, 2 mM AEBSF, Roche Complete Mini EDTA-free protease inhibitor cocktail [Roche, Basel, Switzerland], 0.25% Igepal CA-630) per 140 mg. Parasite membranes were disrupted by passing the lysate through a 26.5 gauge needle 15 times using a syringe. Samples were spun at  $2,500 \times g$  for 5 min at room temperature (RT). Pellets were washed twice with 1 ml ice-cold wash buffer (50 mM Tris-HCl at pH 8.0, 50 mM NaCl, 1 mM EDTA) and resuspended in the same buffer to a final volume of 250  $\mu$ l. Samples were mixed with 95  $\mu$ l 2% SDS to a final concentration of 0.5% and incubated at 55°C for 15 min. Suspensions were cooled down to RT before they were mixed with 105  $\mu$ l 25 mM EZ-link Iodoacetyl-PEG2-Biotin (IPB) (Thermo Fisher Scientific, Waltham, MA, USA) to biotinylate proteins. After incubating for 1 h at RT while rotating, the SDS was neutralized by adding 1.3 ml 1 $\times$  NEBuffer 2 (New England Biolabs [NEB], Ipswich, MA, USA). Samples were mixed with 225  $\mu$ l 10% Triton X-100 to a final concentration of 1% and incubated for 10 min on ice, followed by 10 min at 37°C. Five  $\mu$ l 1 M DTT, 100  $\mu$ l 10 $\times$  NEBuffer 2, 415  $\mu$ l water and 35  $\mu$ l MboI restriction enzyme (NEB) (25 units/ $\mu$ l) was added to digest the DNA overnight at 37°C in a total volume of 2,530  $\mu$ l.

**Day 2** After digestion, samples were loaded into a Slide-A-Lyzer Dialysis Cassette G2 (Thermo Fisher Scientific) and dialyzed for 4 h at RT against 1 L of dialysis buffer (10 mM Tris-HCl at pH 8.0, 1 mM EDTA) to eliminate excess IPB remaining from the biotinylation step. Dialysis buffer was renewed after 3 h. Four hundred  $\mu$ l MyOne Streptavidin T1 beads (Life Technologies, Carlsbad, CA, USA) were washed 3 times with PBS + 0.01% Tween-20 (PBST) and beads were resuspended in 2 ml PBST. Dialyzed samples were divided into 5 equal aliquots of 500  $\mu$ l in 1.7 ml prelubricated microcentrifuge tubes (Corning, Corning, NY, USA). Four hundred  $\mu$ l beads were added to each tube and samples were incubated for 30 min at RT while rotating. To prevent interference of unbound streptavidin on the beads with later steps (adding biotinylated dCTP) 5  $\mu$ l neutralized IPB was added to each tube. IPB was neutralized by adding an equimolar amount of 2-mercaptoethanol. Samples were incubated for an additional 15 min at RT while rotating. Not biotinylated chromatin and not cross-linked DNA was removed by washing the magnetic T1 beads once with 600  $\mu$ l PBST and once with 600  $\mu$ l wash buffer (10 mM Tris-HCl at pH 8.0, 50 mM NaCl, 0.4% Triton X-100). Beads were resuspended in 100  $\mu$ l of the same wash buffer. MboI generated 5' overhangs were filled in by adding 63  $\mu$ l water, 1  $\mu$ l 1 M MgCl<sub>2</sub>, 10  $\mu$ l 10 $\times$  NEBuffer 2, 0.7  $\mu$ l 10 mM dATP, 0.7  $\mu$ l 10 mM dTTP, 0.7  $\mu$ l 10 mM 2'-Deoxyguanosine-5'-O-(1-thiotriphosphate), sodium salt, Sp-isomer (Axxora, San Diego, CA, USA), 15  $\mu$ l 0.4 mM Biotin-14-dCTP (Life Technologies), 4  $\mu$ l 10% Triton X-100 and 5  $\mu$ l 5U/ $\mu$ l DNA Polymerase I, Large (Klenow) Fragment (NEB). Samples were incubated for 40 min at RT while rotating. Reaction was stopped by adding 5  $\mu$ l 0.5 M EDTA to the suspension. After 2 min of incubation at RT while rotating, beads were washed twice with 600  $\mu$ l buffer (50 mM Tris-HCl at pH 7.4, 0.4% Triton X-100, 0.1 mM EDTA) and resuspended in 500  $\mu$ l of the same buffer. Each sample was transferred into a 15 ml centrifuge tube. For blunt-end ligation under dilute conditions 500  $\mu$ l sample was mixed with 4 ml water, 250  $\mu$ l 10 $\times$  Ligase Buffer (NEB), 100  $\mu$ l 1 M Tris-HCl at pH 7.4, 90  $\mu$ l 20% Triton X-100, 50  $\mu$ l 100 $\times$  BSA and 2  $\mu$ l 2,000 U/ $\mu$ l T4 DNA Ligase (NEB), and incubated overnight at 16°C.

**Day 3** The ligation reaction was stopped by adding 200  $\mu$ l 0.5 M EDTA to each of the five 15 ml tubes. The magnetic T1 beads were collected on the wall of the tube using a magnet and the solution was aspirated out of the tube. The beads were resuspended in 400  $\mu$ l extraction buffer (50 mM Tris-HCl at pH 8.0, 0.2% SDS, 1 mM EDTA, 500 mM NaCl) and the mix was transferred into a new microcentrifuge tube. Samples were treated with 5  $\mu$ l RNase A (20 mg/ml) (Life Technologies) for 45 min at 37°C and with 20  $\mu$ l Proteinase K (20 mg/ml) (NEB) overnight at 45°C.

**Day 4** An additional 5  $\mu$ l Proteinase K was added and samples were incubated for another 2 h at 45°C. Beads were collected on the wall of the tube and DNA was extracted from the supernatant twice with an

equal volume of phenol:chloroform:isoamyl alcohol (25:24:1) and once with an equal volume of chloroform. The aqueous phase was mixed with sodium chloride and glycogen to a final concentration of 200 mM and 25  $\mu\text{g}/\text{ml}$ , respectively. DNA was precipitated by adding 900  $\mu\text{l}$  ice-cold 200 proof pure ethanol and incubation at  $-20^{\circ}\text{C}$  overnight or at  $-80^{\circ}\text{C}$  for  $> 1$  h. Precipitated DNA was pelleted by centrifugation at  $16,100 \times g$  for 30 min at  $4^{\circ}\text{C}$ . Pellets were washed with ice-cold 80% ethanol, spun down at  $16,100 \times g$  for 15 min at  $4^{\circ}\text{C}$  and resuspended in 20  $\mu\text{l}$  10 mM Tris-HCl at pH 8.0.

**Day 5** Two to five  $\mu\text{g}$  purified DNA was treated with Exonuclease III (NEB) (60 units per  $\mu\text{g}$  DNA) in 120  $\mu\text{l}$   $1\times$  NEBuffer 1 for one h at  $37^{\circ}\text{C}$ . The reaction was ended by adding 2.7  $\mu\text{l}$  0.5 M EDTA and 2.7  $\mu\text{l}$  5 M NaCl, and subsequent incubation at  $70^{\circ}\text{C}$  for 20 min. DNA was transferred into TPX microtubes (Diagenode, Denville, NJ, USA) and sonicated using a Bioruptor UCD-200 (Diagenode) at high intensity for 30 min using 30 sec on, 30 sec off cycles. Agencourt AMPure XP beads (Beckman Coulter, Brea, CA, USA) were used to purify DNA, which was eluted in 50  $\mu\text{l}$  water.

**Day 6** All amounts mentioned for subsequent end-repair and adding of A-overhangs are per  $\mu\text{g}$  of DNA used as input at the start of Day 5. DNA ends were repaired by treating the DNA with 1 U of DNA Polymerase I, Large (Klenow) Fragment (NEB), 3 U of T4 DNA Polymerase (NEB), 10 U of T4 Polynucleotide Kinase (NEB) in 100  $\mu\text{l}$   $1\times$  T4 DNA Ligase Buffer (NEB) with 0.4 mM of dNTPs for 30 min at  $20^{\circ}\text{C}$ . Importantly, T4 DNA Polymerase and not T4 DNA Ligase should be used for end-repair (Reza Kalhor, personal communication). This was apparently written incorrectly in the original TCC protocol [2]. DNA was purified using magnetic beads and eluted in 40  $\mu\text{l}$  water. A-overhangs were added by treating the DNA with 3 U of Klenow Fragment ( $3' \rightarrow 5'$  exo-) (NEB) in 50  $\mu\text{l}$   $1\times$  NEBuffer 2 with 0.2 mM dATP for 30 min at  $37^{\circ}\text{C}$ . The reaction was ended by adding 1  $\mu\text{l}$  of 0.5 M EDTA. Ten  $\mu\text{l}$  of MyOne Streptavidin C1 magnetic beads (Invitrogen) were washed twice with 500  $\mu\text{l}$   $1\times$  Bind & Wash (B&W) buffer (5 mM Tris-HCl at pH 7.4, 0.5 mM EDTA, 1 M NaCl) and resuspended in 50  $\mu\text{l}$   $2\times$  B&W buffer. The DNA sample and the C1 beads were mixed and incubated at RT for 30 min. The beads were washed once with 500  $\mu\text{l}$   $1\times$  B&W buffer with 0.1% Triton, once with 500  $\mu\text{l}$  10 mM Tris-HCl at pH 8.0 and were resuspended in 10  $\mu\text{l}$  water.

The Encore NGS Multiplex System (Nugen, San Carlos, CA, USA) was used for adapter ligation and library preparation of the cross-linked and non-cross-linked trophozoite samples. Amplification conditions were 45 sec at  $98^{\circ}\text{C}$ , 5 cycles of 15 sec at  $98^{\circ}\text{C}$ , 30 sec at  $55^{\circ}\text{C}$  and 30 sec at  $62^{\circ}\text{C}$ , followed by 10 cycles of 15 sec at  $98^{\circ}\text{C}$ , 30 sec at  $63^{\circ}\text{C}$  and 30 sec at  $72^{\circ}\text{C}$ , and a final elongation of 5 min at  $72^{\circ}\text{C}$ . NEBNext Multiplex Oligos for Illumina (NEB) and NEBNext Library Prep Reagents Set (NEB) were used for adapter ligation and library preparation of the ring and schizont samples. Amplification conditions were 45 sec at  $98^{\circ}\text{C}$ , 8 cycles of 15 sec at  $98^{\circ}\text{C}$ , 30 sec at  $55^{\circ}\text{C}$  and 30 sec at  $62^{\circ}\text{C}$ , followed by 3 cycles of 15 sec at  $98^{\circ}\text{C}$ , 30 sec at  $63^{\circ}\text{C}$  and 30 sec at  $72^{\circ}\text{C}$ , and a final elongation of 5 min at  $72^{\circ}\text{C}$ . KAPA HiFi DNA Polymerase HotStart ReadyMix (Kapa Biosystems, Woburn, MA, USA) was used for all PCRs. DNA in the supernatant was purified with Agencourt AMPure XP beads. Library quantification was performed using a 2100 Bioanalyzer (Agilent Technologies, Santa Clara, CA, USA). Libraries were subsequently sequenced on a HiSeq 2000 system (Illumina, San Diego, CA, USA) at the Institute for Integrative Genome Biology (University of California, Riverside, USA), generating 50 bp paired-end sequence reads.

## Supplementary Note 2: Assigning statistical significance to normalized contact maps

We can describe our confidence estimation procedure as follows. Let  $N_{inter}$ ,  $N_{intra}$  denote the total number of observed informative paired-end reads between inter and intrachromosomal locus pairs and  $M_{inter}$ ,  $M_{intra}$  denote the number of such inter and intrachromosomal locus pairs, respectively. If we assume that an observed paired-end read is equally likely to come from any locus pair, then the null probability that the read comes from a specific locus pair is  $p_{inter} = \frac{1}{M_{inter}}$  and  $p_{intra} = \frac{1}{M_{intra}}$  for intrachromosomal and interchromosomal pairs, respectively. We use a previously described iterative procedure [8] to estimate

locus-specific biases and adjust the interchromosomal probability accordingly:  $\bar{p}_{ij} = p_{inter} * B_i * B_j$ , where  $B_i$  and  $B_j$  are the estimate bias terms.

For intrachromosomal locus pairs the assumption that each read is equally likely to come from any locus pair fails due to the significant effect of genomic distance on the contact probability. To account for this effect, we used a method that estimates the prior contact probability between two loci given their genomic distance by fitting a smooth spline and refining the underlying null distribution of contact probabilities [12]. For intrachromosomal locus pair  $(\ell_i, \ell_j)$  with genomic distance  $d$ , this spline is used to estimate the contact probability  $p_{intra}(d)$ . Similar to the interchromosomal pairs, this probability is corrected for biases of each locus  $\ell_i$  and  $\ell_j$  resulting in  $\bar{p}_{ij} = p_{intra}(d) * B_i * B_j$ .

Once the corrected null probabilities  $\bar{p}_{ij}$  are computed for each possible inter and intrachromosomal locus pair, we computed the significance of observing  $k_{ij}$  informative reads between  $(\ell_i, \ell_j)$  among either  $N = N_{inter}$  or  $N = N_{intra}$  total reads, depending on the contact type. Dropping the subscripts from  $\bar{p}_{ij}$  and  $k_{ij}$ , we calculated the significance as the p-value from the binomial distribution:

$$p(K \geq k) = \sum_{i=k}^N \Pr(K = i) \quad (1)$$

where

$$\Pr(K = k) = \binom{N}{k} \bar{p}^k (1 - \bar{p})^{N-k}.$$

Finally, we corrected the combined collection of  $p$ -values for multiple testing by estimating, for a given  $p$ -value threshold, the proportion of false positive contacts with  $p$ -values below the threshold. This proportion is known as the *false discovery rate* (FDR), which can be estimated using standard methods [4].

### Supplementary Note 3: DNA-FISH

DNA-FISH experiments were performed according to a recently published protocol [13] with minor modifications. *P. falciparum*-infected erythrocytes were pelleted by centrifuging at  $800 \times g$  for 5 min at  $4^\circ\text{C}$ , with minimal braking (brake = 1). To lyse erythrocyte membranes, double sorbitol-synchronized ring and trophozoite stage parasites were treated with 5 volumes of 0.015% cold saponin in cold PBS on ice for 20 or 10 min, respectively. Parasites were spun down at  $4,200 \times g$  for 10 min at  $4^\circ\text{C}$ , with minimal braking, and washed up to 7 times ( $2,000 \times g$ , 10 min, brake = 5) with cold PBS. Parasites were then resuspended 4% formaldehyde (in PBS at room temperature) and fixed on ice for 15 min. After this fixation, parasites were washed 2 times in cold PBS ( $4,200 \times g$ , 1 min, maximum brake) and resuspended in cold PBS.

A monolayer of parasites was deposited within a  $9 \times 9$  mm frame-seal slide chamber (Bio-Rad, Hercules, CA, USA) that was prepared on a standard microscopy slide, and slides were air-dried for 30 min at RT. The fixed, air-dried parasites were washed with PBS for 5 min at RT, treated with 0.1% Triton X-100 in PBS for 5 min at RT and washed twice with PBS for 5 min at RT. Hybridization solution (50% formamide, 10% dextran sulfate,  $2 \times$  SSPE, 250  $\mu\text{g}/\text{ml}$  single-stranded DNA from salmon testes) containing the denatured (5 min at  $95^\circ\text{C}$ ) probes was applied and slide chambers were covered with a coverslip. Slides were denatured at  $80^\circ\text{C}$  for 30 min followed by hybridization at  $37^\circ\text{C}$  overnight. After removal of the coverslip and the hybridization solution, slides were washed in  $2 \times$  SSC/50% formamide for 30 min at  $37^\circ\text{C}$ , followed by  $1 \times$  SSC for 10 min at  $50^\circ\text{C}$ ,  $2 \times$  SSC for 10 min at  $50^\circ\text{C}$  and  $4 \times$  SSC for 10 min at  $50^\circ\text{C}$ . Parasites were equilibrated in M solution (100 mM maleic acid, 150 mM NaCl, 1% bovine serum albumin) set at neutral pH, for 5 min at RT in a humid chamber, protected from light. M solution was removed and replaced with M solution containing Avidin, NeutrAvidin, Rhodamine Red-X Conjugate (Life Technologies) (1:1,000) for detection of the biotin probes. Slides were incubated for 30 min at RT, in a humid chamber, protected from light, and subsequently washed 3 times in TNT solution (100 mM Tris-HCl at pH 7.5, 150 mM NaCl, 0.5% Tween 20) for 10 min at RT with agitation. Cells were stained with DAPI (0.5  $\mu\text{g}/\text{ml}$  in TNT solution) for 2 - 3 seconds. Slides were then air-dried (protected from light) and mounted using gelvatol with 2.5% Dabco anti-fade (Sigma-Aldrich, St. Louis, MO, USA). Images were acquired using an Olympus BX40 epifluorescent microscope (Olympus, Center Valley, PA, USA).



## Supplementary Note 4: Volume exclusion modeling

Tjong et al. show the budding yeast’s dominant architectural features can be entirely explained by a simple volume exclusion model, modeling chromatin as a random flexible polymer with few biologically motivated architectural constraints [14]. Following their methodology, we computed a population of 5000 structures for the budding yeast using the same sets of constraints, and we successfully recovered high correlation between the contact maps generated from the population of structures and the observed Hi-C matrix (Supplementary Fig. 14(a)).

Even though the row-based correlation has been used as a measure of consistency between two contact maps [14, 8], we hypothesized that this measure may be dominated by the strong diagonal trend of contact maps and, hence, may not capture non-random similarity between two contact matrices. To test this hypothesis, we generated an *expected contact matrix* by setting each interchromosomal contact count to the expected contact count for its genomic distance, as defined in Methods. We obtained an even higher correlation between the observed Hi-C matrix and this structureless expectation matrix (Supplementary Fig. 14(b)).

To account for this problem, we developed a new scoring measure, the *normalized* row-based Pearson correlation, which replaces each count value with its ratio to an expected count in the correlation computation (Methods). Supplementary Fig. 14(b) demonstrates that the normalized row-based Pearson correlation is more effective for comparing contact maps: indeed, the correlations between structureless matrices (marked as *expected*) and observed Hi-C matrices are close to zero, while the correlations between the simulated (*VE*) and observed Hi-C contact matrices are conserved.

## Supplementary References

- [1] Z. Duan, M. Andronescu, K. Schutz, S. McIlwain, Y. J. Kim, C. Lee, J. Shendure, S. Fields, C. A. Blau, and W. S. Noble. A three-dimensional model of the yeast genome. *Nature*, 465:363–367, 2010. PMC2874121.
- [2] R. Kalhor, H. Tjong, N. Jayathilaka, F. Alber, and L. Chen. Genome architectures revealed by tethered chromosome conformation capture and population-based modeling. *Nat Biotechnol*, 30(1):90–98, 2011.
- [3] D. M. Witten and W. S. Noble. On the assessment of statistical significance of three-dimensional colocalization of sets of genomic elements. *Nucleic Acids Research*, 40(9):3849–3855, 2012. PMC3351188.
- [4] Y. Benjamini and Y. Hochberg. Controlling the false discovery rate: a practical and powerful approach to multiple testing. *J R Stat Soc Series B*, 57:289–300, 1995.
- [5] W. A. Hoeijmakers, C. Flueck, K. J. Francoijs, A. H. Smits, J. Wetzel, J. C. Volz, A. F. Cowman, T. Voss, H. G. Stunnenberg, and R. Bártfai. *Plasmodium falciparum* centromeres display a unique epigenetic makeup and cluster prior to and during schizogony. *Cell Microbiology*, 14(9):1391–1401, 2012.
- [6] L. Mancio-Silva, Q. Zhang, C. Scheidig-Benatar, and A. Scherf. Clustering of dispersed ribosomal DNA and its role in gene regulation and chromosome-end associations in malaria parasites. *Proceedings of the National Academy of Sciences of the United States of America*, 107(34):15117–15122, 2010.
- [7] K. G. Le Roch, Y. Zhou, P. L. Blair, M. Grainger, J. K. Moch, J. D. Haynes, P. de la Vega, A. A. Holder, S. Batalov, D. J. Carucci, and E. A. Winzeler. Discovery of gene function by expression profiling of the malaria parasite life cycle. *Science*, 301(5639):1503–1508, 2003.
- [8] M. Imakaev, G. Fudenberg, R. P. McCord, N. Naumova, A. Goloborodko, B. R. Lajoie, J. Dekker, and L. A. Mirny. Iterative correction of Hi-C data reveals hallmarks of chromosome organization. *Nat Methods*, 9:999–1003, 2012.
- [9] R.B. Calinski and J. Harabasz. A dendrite method for cluster analysis. *Comm. in Statistics*, 3:1–27, 1974.
- [10] J. E. Lemieux, S. A. Kyes, T. D. Otto, A. I. Feller, R. T. Eastman, R. A. Pinches, M. Berriman, X. Z. Su, and C. I. Newbold. Genome-wide profiling of chromosome interactions in *Plasmodium falciparum* characterizes nuclear architecture and reconfigurations associated with antigenic variation. *Mol Microbiol*, 90(3):519–537, 2013.
- [11] E. M. Bunnik, D. W. Chung, M. Hamilton, N. Ponts, A. Saraf, J. Prudhomme, L. Florens, and K. G. Le Roch. Polysome profiling reveals translational control of gene expression in the human malaria parasite *Plasmodium falciparum*. *Genome Biology*, 14(11):R128, 2013.
- [12] F. Ay, T. L. Bailey, and W. S. Noble. Statistical confidence estimation for Hi-C data reveals regulatory chromatin contacts. *Genome Res*, doi:10.1101/gr.160374.113, 2014.
- [13] M. Contreras-Dominguez, C. B. Moraes, T. Dorval, A. Genovesio, F. M. Dossin, and L. H. Freitas-Junior. A modified fluorescence *in situ* hybridization protocol for *Plasmodium falciparum* greatly improves nuclear architecture conservation. *Molecular and Biochemical Parasitology*, 173(1):48–52, 2010.
- [14] H. Tjong, K. Gong, L. Chen, and F. Alber. Physical tethering and volume exclusion determine higher-order genome organization in budding yeast. *Genome Res*, 22(7):1295–1305, 2012.
